# Supplementary material for: Proteome allocations change linearly with specific growth rate of Saccharomyces cerevisiae under glucose-limitation
Source: Research Square preprint supplement (doi:10.21203/rs.3.rs-464207/v1), 2021-05-18
Supplement: Supplementary file 4 [file 52abdbc0e4ce67b098cc6096.xlsx]

## Sheet: proteome_data_20201007
	Majority protein IDs	Gene Name	S1	S2	S3	S4	S5	S6	S7	S8	S9	S10	S11	S12	S13	S14	S15	S16	S17	S18	S19	S20	S21	S22	S23	S24	S25	S26	S27	Categories
			μ = 0.027h-1			μ = 0.044h-1			μ = 0.102h-1			μ = 0.152h-1			μ = 0.214h-1			μ = 0.254h-1			μ = 0.284h-1			μ = 0.334h-1			μ = 0.379h-1
1	P19097	FAS2	82452.3	79779.5	84618.6	118521	117489	117160	138977	144139	136448	125723	148611	162258	76841.7	102979	105007	83597.9	90792.7	91209.6	85063.3	93305.7	88758.9	78471.5	81948.1	72495.6	62546.1	56921.7	74664.1	lipid metabolism
2	Q00955	ACC1	80980	79181.5	83903.3	86035.3	79691.7	85331.1	67574.9	70916.7	68569.9	55942.4	66497.6	69310.6	34151.6	47097.6	49287	43879.9	47422.1	47966.8	50902.5	56970.9	53373.6	50524.9	51604	46928	40988.6	36394.4	48429.1	lipid metabolism
3	P07259	URA2	39354.8	38889.6	40467.6	42649.7	41779.6	41948.5	50886	52430.9	49829.5	47359.2	55812.3	60319.2	30892.4	43232.1	44807.2	40583.5	42159.7	44787.3	42549.3	52366.8	44115	52879	53874.2	50732	44877.3	41946	59242.8	Nucleotides
4	P07149	FAS1	70992.1	68074.7	71888.3	99290.4	98498.2	98328.5	116102	121263	114972	104024	124851	135125	63434.2	84290.6	87000	70126	74303.7	75095.9	70537.9	75996.3	72702.3	65449.9	68052.1	58567.9	51500.3	47162.5	59724.9	lipid metabolism
5	P06105	SCP160	15866.6	15589	16002	17532.3	16867.3	16872.1	22262.7	23154.9	21791.5	23585.2	26497.2	28712.6	15929.4	22234.4	22374.8	23560.6	24384.9	25720	25762.3	28125.2	25499	30447.9	30838.1	30500	28210.8	23627.6	35529.3	ER
6	P47169	MET5	20952.1	20588.2	21518.6	29175	30060.3	29814.3	43192.7	44949.8	41976	43433.1	51852	55842.7	30819.3	43928.2	44102.2	45505.7	47177.3	50884.3	51254.8	56176.4	52096.1	57857.2	57826	54824.7	49759.3	44786.7	67630.1	Other
7	Q05022	RRP5	4359.08	4399.46	4834.54	5186.6	5019.38	5003.14	6902.53	7178.12	6948.74	7284.79	8959.54	9264.53	5201.36	7387.68	7948.4	7988.35	8230.43	8949.38	8330.4	9116.09	8722.48	9738.57	9737.31	9376.22	8640.71	7961.24	12122.5	Other
8	Q12680	GLT1	8772.1	8700.59	9114.97	10594.7	10897.8	10735.9	16892.7	16655.1	15500	16449.1	19192.3	21941.2	11864.9	16190	16170.7	14590.5	15467.6	15859.3	15520.4	16450.1	15998.1	14899	15061.8	13749	12113	10721.9	14904.9	AminoAcid
9	P38249	RPG1	17910.7	17530.3	18108.4	19638.5	19911.8	19298.7	25637.4	26413.1	24757.2	27652	31389.5	33828.2	19535.4	28243.1	27503.5	29337.5	30590.6	30950.6	31630.9	33464.2	31737.5	33812	33925.3	32175.1	30208.4	24924.1	37231.5	Tanslation
10	P22147	XRN1	4305.24	3893.8	4260.29	4598.97	4297.8	4344.66	5852.98	6271.47	5334.12	5455.57	5940.99	6753.44	3815.7	5104.64	5543.93	4694.12	5158.44	5676.68	5472.54	5641.65	5195.16	5567.57	5659.11	5337.23	5059.97	4298.35	5853.72	Transcription
11	P10964	RPA190	5329.56	5125.2	5359.67	6075.16	6111.16	6081.65	7999.92	8279.47	7408.36	7855.54	9260.94	10106	5675.12	8078.46	8028.03	8051.66	8541.28	8670.68	8786.26	9753.15	8915.4	9314.65	9773.13	9033.38	8561.22	7935.76	11733.8	Transcription
12	Q03690	CLU1	13518.2	13669.4	13768.5	15157.4	14480.7	14709.4	23355.5	24317.6	20979.6	24799.3	30664.4	32015.4	19014.2	27958.8	27618.8	30408.4	32367.5	34081	40596.3	45626.4	40233.5	41183.9	42091.4	38286.1	34899.1	29809.3	42270.5	Other
13	P05694	MET6	140782	135205	141008	198847	202299	204050	342178	343749	319371	385870	433502	459201	269941	394242	383155	458219	462712	493245	549065	610468	552809	642455	628506	607484	554600	466989	698136	AminoAcid
14	P31539	HSP104	378453	375739	366486	325833	300339	311643	195694	199268	209426	145514	146096	156575	54910.2	58841.5	58860.7	37404.8	38295	36196.6	33882.2	39861	34153.6	40379.4	40319.5	37913.4	34136	26483.7	37925.7	Chaperon
15	P32589	SSE1	180355	183836	181652	181906	171485	173356	167215	167781	158056	168751	190382	201772	107651	154065	146340	154570	166127	162703	164666	164920	165077	171551	168018	163141	152342	126969	190011	Chaperon
16	Q12019	MDN1	585.506	621.963	571.212	646.043	639.941	628.587	864.282	712.849	747.147	600.939	565.153	872.84	468.065	720.751	331.476	748.986	430.318	639.567	682.301	474.466	745.694	467.886	683.124	644.858	395.416	494.455	548.628	Mitochodria
17	P08566	ARO1	13780	13059.8	13274.9	15796.4	15648.4	15240.6	18813	19210.8	17528.4	18323.6	19806.8	22791.4	11575	14792.5	15116.2	13820.6	14718.4	15419.3	16420.8	18457.5	16902.6	18303.8	18020.6	17438.5	15242.8	13898.7	20014.2	AminoAcid
18	P22137	CHC1	18735.5	18373.5	19373.9	19206.1	18038.6	19166.1	19709.1	19918.5	18496.6	17404.9	20445.4	22303.1	11426	15203.6	15922.4	13914.8	14661	15249.9	13578.6	15241.6	14158.2	13558.5	14276.6	12951.4	10963.9	9872.64	12284.5	Other
19	P16521	YEF3	74638.3	70167.4	75141.4	91540.7	90517.7	100381	171439	168256	160589	183770	219734	245350	139530	207174	208217	227488	240113	238960	252313	287211	257015	326446	317599	314174	289836	255631	389852	Tanslation
20	P33416	HSP78	75650.9	76178.4	73131.8	67874.2	63109.6	66059.9	48372.9	49943.1	50331.3	39594.2	40900.1	44230.4	20669.3	26433.8	26383.4	23028.5	23917.3	23148.4	21706	24609.6	21879.9	21074.5	21346.3	19961.5	16585.5	12535.3	17380.7	Chaperon
21	P07806-2:P07806	VAS1	23822.4	23040	23700.2	27387.3	26438.2	27297.8	36100.5	37568.3	34781	34268.2	41454.3	44523.8	24254.8	33183.2	33067.9	31595.7	34447.6	34686.7	35798.5	40607.6	37637.1	41925.7	43111	40161.5	36591.6	34607.6	48151.8	Mitochodria
22	P36775	PIM1	7402.58	7527.83	7565.55	7282.2	7323.96	7280.77	8972.04	9295.16	8285.41	8989.56	10255.5	10855.1	6462.38	9333.35	8923.1	9433.09	10081.2	9952.59	10869.7	12432.2	11701.3	11877.5	11929.9	11718.8	10465	8202.02	11642	Mitochodria
23	P39692	MET10	9036.82	8908.2	9557	14214.5	14891.5	14611.1	26053.2	26933.9	23862.7	27521	32564.1	35816.8	20039.6	28957.8	28769.9	29949.5	31474.5	32753.7	34338.1	37217.3	33830.2	37138.4	37346.6	35164.7	33304.1	29742.8	43776.8	Other
24	P07702	LYS2	10188.2	10114.4	10457.3	12627.3	12166.5	12629.6	16201.6	16690.1	15347.5	14170.7	16584.2	18447.6	8756.97	11556.3	11589.3	10200.8	11015.3	10965.7	11044.9	13057.5	11610.6	15116.3	15713.4	14827.1	14241.1	13991.8	20852.5	AminoAcid
25	P17255	VMA1	41338	38507.8	41602.3	39524.7	41373.1	39999.4	49705.4	50417.4	47828.7	52760.4	55430.9	59197.7	34994.1	49756.1	47172.4	49585.6	51147.7	51164.3	47965.6	53447	49161.4	59710.3	58784.4	56889.7	54044	43456.5	67043.8	Energy
26	P19524	MYO2	1871.99	1824.94	1737.97	1968.55	1807.52	1976.27	2735.05	2725.55	2450.6	2438.89	2863.23	2967.32	1615.01	2378.78	2395.06	2369.26	2424.35	2693.96	2411.19	2560.05	2557	2568.12	2676.84	2380.65	2181.81	2082.66	2717.4	Other
27	P40825-2:P40825	ALA1	17948.8	17266.4	18591.4	21269.9	21485.1	21478.1	28782.1	29843.6	27936.3	30030.4	34272.7	36942.2	21173.4	29935.3	29164.1	30594.3	32090.8	31578.2	32453.8	36076.6	32465.8	37829.5	37331.7	35830.1	32903.9	27677.9	40558.3	Mitochodria
28	P07245	ADE3	27346.4	26205.4	28459.6	32511.6	34344.6	33644.6	49261.7	51685.6	47048.3	51581	60039.4	63359.8	35229.8	49966	48568.6	49975.6	54067.1	53750.4	54389.9	58718.5	54683.9	60586.5	61276.5	59898.4	56806.2	48296.8	76946.9	Other
29	P26637	CDC60	19282.4	19334.6	19680.3	20926.3	20195.1	20534.5	26447.9	28199.7	25757.6	26772.6	30914.3	32356.6	18397.8	26203.2	26656.6	27479.5	27580.2	29744	29386.3	33007.8	29198.1	36781.1	36464.1	35200.7	33056.3	29222.1	45943.9	Other
30	P09436	ILS1	16792.6	15836.3	16357	18845.2	18037.2	18454.6	23956.2	24406	22863.4	21935.6	27263.7	28657.9	14862.1	20814.1	20134.5	18810.5	20459.7	20681.8	20649.7	24254.7	21439.8	26188.2	26257.4	24657.3	22714.8	22098.6	32965.6	Other
31	P32454	APE2	23591.7	22559.6	23553.9	21445.8	19696.5	21960.3	20422.7	20628.9	19771.3	17732.2	20511.9	23014.4	11523.3	14266.7	15031.4	12583.3	12825.2	13878.3	12242.6	11572.9	12347.8	11350	10911.5	9898.26	9618.77	7564.72	11602.2	Mitochodria
32	P22515	UBA1	26459.9	25986.6	27187.3	28782.4	28557.2	28431.5	32707.7	32486.4	30611.5	30955.2	34316.6	36952.5	19549.9	26084.4	28051.2	25309.8	26247.4	27048.1	25136.7	26785.2	24753.7	27824.7	27526.5	26798.8	24112.3	19353.9	30657.7	Other
33	Q02207	FOX2	51606.5	56511.5	52386.1	57096.3	57050.4	57672.2	42868.2	46739.7	41068.1	37744.1	39973.8	44222.7	22622.4	30696.7	29661.7	25537.5	26915.2	26514.5	19149	10017.2	19200.4	3745.95	4160.95	3210.54	2116.54	1207.77	1331.02	lipid metabolism
34	Q05050	EIS1	21150.3	22039.2	22874.3	24307	21790	23823.3	21417.6	19504.5	21192.1	19078.8	17754.3	21627.4	10188.5	13067	13958.7	11626.1	12252.8	12158.5	9566.61	9726.07	10126.1	9582.5	9491.97	9308.31	8061.37	6097.83	7908.29	other
35	Q08972	NEW1	7117.9	7002.29	7395.43	7562.85	7298.48	7249.03	8437.44	8453.84	7859.5	8030.54	9275.1	9701.14	5660.68	7771.41	7508.79	7695.46	8253.09	8722.28	8492.76	9863.78	8485.57	11953.8	11825.7	11526.6	11244.2	10040.1	16181.9	Mitochodria
36	P15108	HSC82	469677	469251	491394	437620	418994	417949	362891	364592	356527	352530	389886	440743	220878	302644	307211	324765	321525	346454	329645	318190	323676	331026	312165	319909	295666	230486	372835	Chaperon
37	P32324	EFT1	214726	214464	218610	222597	217058	207614	250694	259060	238942	265912	309225	325107	178777	254935	247754	259451	277265	278399	307970	354364	304681	367750	377219	356405	338224	286867	408888	Tanslation
38	P33892	GCN1	2242	2463.05	2340.52	2735.33	2426.18	2444.87	3301.96	3406.7	3216.87	3068.94	3503.8	4550.84	2262.6	2936.2	3361.12	2783.43	2691.93	3248.23	2939.8	3425.95	2991.59	3308.9	3569.37	3393.15	3089.32	2551.76	3875.12	Tanslation
39	Q02455	MLP1	2423.46	2345.27	2706.24	2879.42	2785.07	2673.78	3121.87	3379.75	3235.92	3667.89	5281.89	5329.79	2235.51	2208.3	3042.27	2294.08	2628.74	2819.31	2037.74	2288.85	2032.7	2480.6	1990.99	2588.83	2052.76	1722.53	2357.51	Other
40	P10592	SSA2	148892	154643	156732	154536	145300	151679	122706	125364	128098	113275	121083	129104	65751.3	88971.1	83994.6	83925.2	85832.5	87432.2	84610.4	90709.1	86260	95015.3	94341.4	92464	84945.5	69212.2	103570	Chaperon
41	P16861	PFK1	55652.1	58440.4	56757	57050	55232.4	55823.3	55216.2	57074.3	55349.5	53163.3	60584.1	65373.5	34804.1	48849.9	48972	49800.2	52126.8	53638	55463	62601.9	56194.5	62224.2	62226.9	59984.7	54828.5	46019	69447.2	Glycolysis
42	P46655	GUS1	40534.6	39767.7	40938.8	43269.7	43968.6	44588.9	53552.7	55060.6	52146.9	56993.1	65959.8	67701.3	41140	60519.4	57887.2	63228.3	64548	65052.8	62824.4	69770.4	63572.6	73292.5	71797.8	69188.7	63422.1	51901	77367.4	Other
43	Q07653	HBT1	14256	15145.2	14263	13261.7	11736.3	13686.3	9138.96	9968.1	10247.4	6882.25	6175.13	6872.93	1641.29	1196.65	1437.85	808.825	1211.57	1238.37	1018.24	947.826	1082.27	594.392	1198.78	2583.42	887.118	679.969	1777.3	Transcription
44	P10591	SSA1	1.28748e+06	1.34412e+06	1.39528e+06	1.46606e+06	1.31733e+06	1.23077e+06	1.02555e+06	1.06184e+06	1.03655e+06	914139	937375	1.01901e+06	495782	629293	625948	524762	564530	509873	486482	536893	500962	484725	489499	453878	387484	289673	373600	Chaperon
45	P15705	STI1	233937	247764	241837	221268	204911	212718	146629	149646	149405	128356	133685	139513	63626.5	88797.8	84143.2	80700.9	84816.7	83047.2	80787.7	74673	79936.7	70978.2	70411.4	67384	62162	50361.5	74858	Chaperon
46	P38972	ADE6	19247.8	19283.8	19371.5	22314.3	21928.6	23312.7	28171.2	28637.9	26065.8	28186	33373.1	35920.7	18838.1	26472.8	26402.5	26702.7	28515.9	30537.6	30160.4	33986.6	30786.1	33591.4	32094.4	31342.1	28371.3	26421.7	40405.4	Nucleotides
47	P39730	FUN12	13842.4	13837.7	14032.4	14804	14712.4	14296.1	19889.3	20381	18044	20601.6	25064.7	25827.1	15009.4	22245.8	20688.8	22156.9	24511.3	24496.9	25182.1	25884.9	25572.4	26310.3	26935.1	25822.1	24598	20298.9	30117.6	Tanslation
48	Q00402	NUM1	2609.64	2510.82	2679.16	2969.95	2622.73	2669.45	3083.3	3045.64	3101.26	3065.69	3713.42	4082.3	2228.84	2875.95	3200.26	3065.53	3086.29	3253.46	3088.67	3156.81	3167.06	2833.62	2953.56	2512.53	2206.37	1942.25	2651.39	ER
49	P07213	TOM70	23473.9	22866.4	23783.4	25513	25280.2	26425.7	36090.6	37134.9	34708	38871.1	44153.7	46963.5	28557.7	42836.9	40039.3	46171.4	46914	47590.5	52435.6	57715.8	54207.9	60006.2	59414	56046.1	52217.9	41978	58481.5	Mitochodria
50	P32590	SSE2	42358.5	43132.7	44059.7	40556.2	36940.6	40983.6	23672.7	23474.4	24177.1	17461.3	16610.2	17286.5	5310.62	4870.14	4962.7	2290.39	2396.61	2346.63	2121.04	1640.23	2137.28	971.769	1209.12	1376.77	1218.63	609.913	3014.58	Chaperon
51	P04801	THS1	35199.3	34557.5	36533	34225.1	33829.6	33003.2	45205.7	43861.6	42136.7	46372.5	51059.3	55678.1	32868.4	44727.4	44194.7	47433.8	48299.5	50402	48384.9	50541.5	51702.6	52087.3	52030.8	51293	46626.9	38221.9	58965.3	Mitochodria
52	P16474	KAR2	67551.8	66717.3	65235	66139.5	60506.7	63078	65629.4	65976.7	65339.2	66789	71132.7	73262.7	38730	52753.2	50162	47829.9	49119.8	48207.3	49428.1	54275.6	49838.3	57840.3	56399.8	55242	52489.8	41979.3	64360.8	Stress
53	P19414	ACO1	111209	108157	120966	123320	118213	117933	157535	163141	150849	166840	195761	196957	116419	172802	169484	199016	212135	220159	244925	289799	243882	271046	272901	249980	216345	167104	213545	AminoAcid
54	P38088-2	GRS1	1542.65	1507.19	1620.94	1613.54	1665.06	1719.89	2284.78	2305.76	2142.71	2462.08	2725.98	2855.87	1734.66	2556.14	2429.3	2651.6	2757.57	2728.72	2815.71	3013.61	2860.77	2985.18	3087.35	2944.3	2662.99	2195.35	3159.48	Tanslation
55	P02829	HSP82	70899.4	71980.3	70605	60928.8	52204.8	54993.7	37937	36547.2	38166.8	29790.2	31713.3	35622.8	15196.3	19049.4	20100	18893.8	17846.3	18842.1	21393.4	19923.3	20376.9	20794.1	19612.5	21073.1	19022.4	13694.7	22881.5	Chaperon
56	P03965	CPA2	34585.1	33169.6	36421.1	51608.5	52907.2	55816	74325.7	80198.8	76598.8	64073.5	70705.1	75215.3	32859.9	40277	43322.9	28899.5	28896.1	30971.8	27023.8	29789	28334.4	33513.8	31841.4	31807.6	28614.4	25974.8	41330.6	Nucleotides
57	P22855	AMS1	19516.8	13095.3	15829.9	15488.4	11645.1	13118	11166.5	8922.65	10788.6	7729.2	6351.5	8712.54	3061.18	3324.8	3978.02	2379.57	2170.89	2325.62	1735.13	1451.47	1905.68	1003.35	1341.07	1279.77	771.743	577.762	985.688	Other
58	P30624	FAA1	36192.5	34023.8	35006.5	35898.7	32288.1	33703.7	37304.4	37104.9	35880.6	32127.7	36490.7	40078.1	20890.4	26705.2	25846.3	21222.4	22821.5	20679.6	13915.1	11222	13725.7	13144.4	13060	12835.6	14365.7	13108.5	19608.4	lipid metabolism
59	P32565	RPN2	13823.5	14191	13478.9	14152.3	13523.6	13460	14536.4	14023.7	13026.9	12855	15180.5	16426	8126.29	10810.4	10898.7	9918.83	10442.2	10347.2	9963.76	10390.9	9773.36	10406.7	10553.2	9139.1	9007.79	8313.03	11529.7	Other
60	P04050	RPO21	5360.97	5218.76	5695.5	6000.03	5905.01	5528.82	7789.28	8033.61	6904.08	7007.55	8274.05	9170.63	4928.86	6829.71	7111.24	6453.76	6893.69	7055.77	6856.74	7516.5	7120.2	7365.72	7367.27	7013.31	6418.24	5789.29	7441.12	Transcription
61	P07264	LEU1	40071.1	37574.4	40102.8	44419.7	43274.5	44741.8	54946.5	57345	54597.7	60261	68670	73366.9	43890.1	63863.1	62978.4	70339.8	71323.2	72708.1	76476.5	77010	77942.1	74123.3	75140.5	71444.5	65585.8	52381.2	78444.6	AminoAcid
62	P21576	VPS1	22293.6	21687	23342	22571.1	22010.2	21087.3	23828.1	23397	22180.4	22983	25381.5	26632.6	15090.9	19793.5	19815.1	18605.5	18933.7	19902.8	18834.8	18680.7	18972.3	16833	17832.6	16632.8	15357.4	12221.2	17134.6	Other
63	P33327	GDH2	16165.9	14484.3	16016.6	15352.8	15144.5	15044.5	19314.9	19712.2	18509.4	18140.3	18615.2	22706	12103.1	15280.9	16748.1	14770.3	14249.2	15707	10222.8	5020.37	10219.4	2705.63	2759.63	2568.96	2008.55	1270.47	1858.73	AminoAcid
64	P00560	PGK1	1.14581e+06	1.16903e+06	1.16584e+06	1.16679e+06	1.10153e+06	1.15285e+06	816001	814978	854570	702903	728989	789593	347593	445374	439122	396939	418699	412952	449648	495313	452362	461265	456060	436091	390186	300448	466365	Glycolysis
65	P11154	PYC1	67275.8	68220.1	68857.6	73518.8	74857.6	77048.6	94942.8	100332	92242.4	89806.9	107017	109415	61038.1	87061.2	88634.1	95699.3	98412.7	104519	107598	115001	109221	117854	117402	108650	95647.4	81835.8	108937	AminoAcid
66	P46367	ALD4	1.47983e+06	1.3534e+06	1.45444e+06	1.39389e+06	1.39785e+06	1.5025e+06	1.35295e+06	1.50586e+06	1.41558e+06	1.33348e+06	1.46455e+06	1.58528e+06	873297	1.13074e+06	1.21499e+06	1.17173e+06	1.11823e+06	1.14716e+06	691654	287587	668430	142463	142430	123519	93343.4	64810.5	69871.9	lipid metabolism
67	P53278	YGR130C	24569.8	26695.2	24981.9	25429.8	25252.5	26069.2	23115.6	23934.7	23408.5	22261.4	21913.5	22533.8	11966.8	15496.7	14679.3	13390	13630.6	13348.8	10889.8	10494.2	10918.2	10330.7	10046.6	9251.6	8743.83	6499.03	8677.58	Other
68	P53622	COP1	13767.4	14066.4	14483	14054	13900	14176.2	16379.5	17134.9	15305.1	15327.9	19436.2	19826.2	10448.5	14327.2	13936.8	13578.4	14360.7	15543.9	14150.8	15389.7	14523.3	15018.6	14968.4	14323.2	12819.1	11037.7	16406.4	Other
69	P00958	MES1	5099.55	5321.4	5545.95	5845	5781.66	5709.33	8167.04	9105.28	7878.23	8952.93	10041.1	10524.3	6442.36	8983.2	9069.93	9483.59	9266.27	10183.9	9638.12	10708.9	10028.9	11929	12152.9	11746.6	11793.9	9717.5	15719.1	Other
70	P32499	NUP2	4224.14	4562.06	4601.62	4141.37	4322.86	3883.21	5134.41	5428.69	4755.04	5128.98	5457.23	5626.43	3156.87	4944.52	4131.34	4592.76	4980.11	4454.74	4516.35	4916.85	4555.6	4935.91	4944.27	4569.24	4634.91	3876.24	5564.01	Mitochodria
71	P38708	YHR020W	15672.2	15406.7	15829.9	17048.5	17030.9	18116.5	24375.3	25781.9	24645.1	26209.3	29952	32195	18473.5	26758.8	25807.3	27787.8	28366.4	28891.6	29713.4	32283.7	31618.8	35963.6	35701.7	35596.6	33538.1	28267.4	44562.3	Other
72	P38934	BFR1	31387.9	34767.3	33462.8	34770.4	35543.4	35943.1	46783.9	48655.5	47427.4	53120.8	57138.2	59974.8	33747.6	49455.7	46450.8	47323.4	48343.6	49019.2	51352.9	52093.6	53661.1	47627.4	48032.2	44724.3	42830	34428.9	49002.9	ER
73	P53852	YNL247W	5477.36	5244.62	5846.35	6184.44	6462.68	6189.21	9492.05	9960.59	8778.78	10279.5	11891.2	12447.3	7555.9	10649.2	10119.5	11170.4	11620.4	11556.7	11945.3	12793.2	12492	13771.5	13432.6	13140.6	12650.4	10482.8	14707.6	Other
74	Q06685	VIP1	3019.44	3216.29	3053.84	2914.35	3004.51	2682.49	3525.17	3437.15	3267.74	3275.4	3947.45	4389.37	2250.61	3120.24	3113.55	3027.54	3207.88	3327.27	2965.07	3001.28	3027.06	3370.84	3377.23	3115.67	3097.88	2323.01	3516.78	Other
75	P00925	ENO2	778879	819346	772489	927278	841446	869203	913026	826198	856831	825321	819715	950198	431735	583263	544496	595686	614137	633071	675105	700644	678252	780650	769045	779122	750812	631643	1.01595e+06	Glycolysis
76	P0CS90	SSC1	155948	155840	157869	145702	144224	142082	162367	166839	155889	173185	199212	203683	119504	183909	173618	199170	205172	208869	234655	283866	239494	283593	283321	266607	238636	186373	254958	Chaperon
77	P13188	GLN4	14054.7	13718.4	14488.4	13452.6	13180.5	13264.8	15990.6	16209.3	15206.6	16474.9	18649.2	19924.5	11690.2	16924.4	17105.8	18056.6	18897.4	19256.6	19633.7	21430	20532.8	22665.2	22998.9	22002.4	20457.3	17257.4	26023.9	Other
78	P19882	HSP60	153281	146249	150288	131186	125913	126965	146559	148239	140096	152506	171119	176652	105761	162171	150123	173888	176717	178683	201848	224022	210374	216431	215732	199213	178938	137273	188073	Chaperon
79	P32191	GUT2	152023	145389	154508	132671	134631	130773	111256	115212	109043	105669	119300	123003	66548.4	97175.1	90017.7	93578.6	96012.7	91321.1	80260.5	80797.2	80848.3	65242.7	69382	62843.8	47315.2	33364	32957.9	lipid metabolism
80	P32327	PYC2	9032.84	8812.34	8823.56	13060.7	12251.7	12209.6	15745.6	15654.9	14750.7	14464.1	15975.4	17694.8	8844.31	13399.4	12603.1	11674.4	12938.8	13167.3	12049.8	12485.2	12448.2	13692.7	12088.4	12518.6	11524.6	10434.4	13841.8	AminoAcid
81	P38144	ISW1	1134.83	1179.96	1204.21	1397.85	1298.51	1313.77	1899.76	2040.6	1756.29	1901.17	2264.98	2454.87	1285.13	1958.61	1824.38	1845.33	1825.63	1876.72	2056.46	1937.73	1886.07	2107.75	2146.88	1938.01	1837.21	1551.83	2228.74	Transcription
82	Q03640	TCB3	1671.67	1689.35	1675.56	1755.14	1828.34	1824.04	1963.07	1972.42	2077.07	1891.69	1939.37	2354.11	1277.54	1638.16	1485.59	1548.75	1512.83	1847.64	1592.74	1702.08	1415.26	1738.1	1629.11	1370.61	1427.42	1231.22	1657.3	ER
83	P09440	MIS1	4275.27	4051.17	4590.12	5182.1	5047.87	5010.88	8068.14	8513.48	7606.44	8019.19	10109.6	10024.9	6293.62	9187.38	8540.09	9723.09	10282.4	10504.1	11061.7	11917.6	11897.7	12775.2	12579.3	12486.6	12426.9	10004.2	16041.4	Mitochodria
84	P12945	NAT1	4565.81	4237.07	4790.14	4532.26	4769.55	4180.57	6162.39	6425.41	5502.75	6297.56	7124.97	7534.25	4203.76	5902.91	5702.37	5966.86	5984.72	6360.46	6640.26	6967.29	6740.65	6895.23	6768.99	6300.51	6294.27	5223.4	7554.67	Mitochodria
85	P13711	POX1	25123	19093.6	24107.5	27171.9	25197.8	26195.6	19354.3	21334.6	21641.8	17171.9	16622.5	18522	11068.3	14406.7	14306.7	13588.8	13481.4	15960.6	10806.3	6320.67	11335.8	3134.64	3575.02	2329.18	1868.4	1925.44	3731.06	lipid metabolism
86	P14126	RPL3	240877	248267	261091	267092	271571	286320	355717	372002	352134	401819	445802	474796	282206	401942	407957	432841	446106	455779	450593	491084	460345	539238	531604	522903	480326	402142	613474	Tanslation
87	P25694	CDC48	86878.1	88858.2	92263.8	85706.7	85326.5	82770.5	80634.9	85128.5	82150.5	80718.5	88119.4	91537.7	49610.4	65638.5	64177.3	60622.8	60739.4	61038.4	58922.3	59191.8	59871.7	59134.7	58603.9	56275.1	51734.3	41725.8	63347.4	ER
88	P31688	TPS2	12399.3	12424.7	13160	14051.1	14171.4	13963.4	18069.1	18647.4	16823.3	15823	16336	17360.5	8231.39	9297.07	9665.97	6728.94	6976	7035.4	6292.75	6578.73	6496	5966.34	6249.27	5776.04	4892.54	3531.81	4628.76	Stress
89	P38764	RPN1	20793.4	20725.3	20857.5	21798.5	19970.7	20175.5	22218.4	22801.5	21416.8	20438.6	23741.6	26402.4	13642.8	18162.1	19055.2	16067.7	16934	17664.7	16815.1	18052.5	16876.3	17733.9	17459.6	16245.7	15974.3	13304.6	18822.1	ER
90	P47047	MTR4	2215.59	2197.65	2354.87	2431.14	2092.12	2247.07	2927.37	3030.02	2355.53	2855.95	3159.35	3463.4	2063.68	3088.42	2836.57	2650.91	2998.16	3094.89	3037.75	3360.72	3361.19	3929.8	3786.22	3616.46	3133.09	2761.79	4470.12	Other
91	P00359	TDH3	1.96733e+06	2.07094e+06	1.99028e+06	2.02012e+06	1.85048e+06	1.96245e+06	1.556e+06	1.53897e+06	1.5882e+06	1.38456e+06	1.44754e+06	1.564e+06	740662	973348	907518	937944	942786	964431	997913	1.08469e+06	998538	1.12343e+06	1.1158e+06	1.08358e+06	1.01341e+06	787205	1.2784e+06	Glycolysis
92	P04147	PAB1	63299.8	64126	64396.6	64700.9	66799.3	67220	84265.6	85886.2	83514.2	90336.3	102591	106954	63300.8	92555.8	86118.2	92173.2	97239.9	97035.1	97876.4	105052	99757.2	108126	107804	103673	98609.1	79708.8	118089	Other
93	P23615	SPT6	2995.34	2770.01	3112.74	3234.19	3147.06	3240.74	4076.7	4024.94	4204.08	3615.95	4446.76	4775.66	2954.06	3441.21	3674.59	3646.44	3751.54	4228.58	3531.54	4123.59	4002.87	3800.22	4229.32	3906.13	3060.31	2746.25	4096.51	Transcription
94	P39935	TIF4631	9442.87	9718.44	9633.77	9532.88	9690.05	9248.12	12542.3	13511.4	11558.2	14171.4	16087.7	16344	9964.58	15131.8	13366.5	14411.8	16140.5	15550.8	17669.1	18631.9	17666.8	19527.4	19864.7	18559.6	18613.8	15443.5	22026.2	Tanslation
95	P00815	HIS4	38187.9	37532.7	39126.7	53447.6	53754.6	56909.7	78338.4	82240.6	77944.5	78747.4	84891	91623.8	45016.9	61564	59374.4	53232.6	54267.6	56535.9	58131.1	72849.2	59832.4	84058	81429.5	81147.1	78128.5	65044.7	102523	AminoAcid
96	P09624	LPD1	71935.3	71968.9	75339.1	78631.6	78543.9	80118.3	92964.5	95630.4	93340.9	97345.8	105479	110112	62104.4	92045.4	86294.8	87054.1	92405.7	89723.2	89575.3	99671.9	88758.2	88576.3	91727.5	83451.9	74094.5	55658.5	73905.5	Mitochodria
97	P20967	KGD1	70939.6	66346	72151.4	68919.9	67946.6	70308.3	73821.8	75553	71060.7	72264.4	79989.3	87147.8	48006.7	68952.5	69854.8	68411.5	70932.8	72455.3	80250	103819	82619.9	79783.7	84578.7	73748.6	61156.8	46335	59577.8	Mitochodria
98	P32898	CYM1	2495.23	2071.59	2440.62	2343.71	2256.99	2149.77	3155.51	3039.35	2702.87	3304.03	3739.2	3996.42	2194.36	3102.52	3232.86	3507.6	3594.7	3775.1	4041.07	4230.14	4171.15	4192.84	4047.81	3821.88	3720.9	2957.44	4465.18	Mitochodria
99	P40053	AIM9	8769.46	9039.7	8592.69	8446.83	8208.76	9046.86	10097.1	9767.05	9445.23	10184.8	11150.1	11319.4	6849.72	9805.45	8872.81	9499	9788.05	9951.52	9197.78	9766.54	10529.9	9442.18	9447.54	8826.34	8347.71	6175.18	8621.08	Mitochodria
100	P47068	BBC1	7340.62	7366.87	7450.05	7382.14	7496.13	7090.9	7826.11	8564.59	8106.15	7289.87	7755.78	8331.08	4953.5	6141.07	5821.42	5374.86	5581.83	5441.78	5098.16	4967.29	5156.07	4733	4658.43	4214.08	4087.22	3138.6	4516.89	Other
101	Q03104	MSC1	111223	109766	104360	109823	102141	114291	77930.1	76385.5	81074.3	53326.2	52822.6	54263.9	15050.6	12580.1	13311.6	3648.34	3607.22	3224.34	2172.11	2193	3761.83	2291.54	2663.08	5162.94	1973.44	2782.89	3544.85	ER
102	Q05506	YDR341C	25255.4	24138.3	24599.8	25126.3	24614.9	22363.6	26781.2	26554.2	26122.3	28056.2	29322.8	31228.9	18095.3	23011.1	23155.9	23618.7	23136.1	24708	24965.9	23914.5	23740.2	24737.8	23045.4	22499.4	20733.5	15938.4	27378.6	Mitochodria
103	Q06440	CRN1	11375.1	10944.1	11851	10628.1	10859	10725.1	14915.6	15409	14567.1	15419.4	17410.4	17435.3	10349.9	14121.3	13887.6	14039.6	14807.7	13501.1	13974.8	14909	14217.8	15699.4	14766.7	14684.8	13370.9	10223.3	15098.9	Other
104	Q12496	YOL098C	3047.42	3043.37	3027	3000.11	3104.17	3084.84	3500.03	3763.07	3056.26	3089.74	4380.63	4466.86	2103.06	3029.06	3334.68	2844.67	2632.91	3237.44	2633.41	3162.1	3232.97	3212.4	3297.53	3085.04	2804.03	2386.05	3906.48	Other
105	P00175	CYB2	61945.6	58988.1	61588.8	70699.4	75193	77132.8	78165.9	77642	76810.7	81527.7	88950.5	95932.8	57873.3	89322.4	84223.4	94057.7	95432.5	90104.8	89839.9	76952.5	89969.6	65995.2	67116.1	60608.1	52305.3	39670.7	48773.5	Mitochodria
106	P00931	TRP5	38429.9	40517	41257.2	53841	51786.5	54331.9	77099.5	77745.9	76222.1	75551.2	80125.3	87102.2	45164.7	61526.4	58060.8	52468.4	53504	54839.7	49193.1	53989.8	51093.7	62255.7	60762.6	62015.7	58020.8	48278.2	74344.6	AminoAcid
107	P05453	SUP35	30186.4	31137.9	30894.7	28681.6	27885.2	26205.6	28642.1	29716.4	27222.6	27077.8	33539.8	35871.1	18807.5	26377.6	27209.6	26636.3	26668.6	26928.5	26888.6	28558.6	27260.5	28543.8	29135	27747.7	26847.5	21863.6	31438.4	Other
108	P08518	RPB2	6062.5	5638.46	6065.79	6469.88	6125.32	6503.61	7472.37	7936.6	7311.82	7139.29	8257.29	9824.86	4906.28	6805.89	7097.73	6936.79	6911.28	7218.58	6977.77	7591.1	7039.76	8131.5	7943.77	7637.8	6992.68	6108.36	9371.91	Transcription
109	P11484	SSB1	157636	160135	154949	183924	173194	175725	240435	252729	256439	274147	322244	356162	210617	317270	290686	342389	352954	354175	392007	435816	420066	467003	478396	474055	443407	375368	550218	Chaperon
110	P32582	CYS4	40996.4	41344.3	40855.8	46835.7	46013.2	46460.2	54072.5	55301.8	54099.3	57783.9	63832	65254.5	39466.3	57870.8	51832	59839.3	62166.5	60891.5	62307.9	67839.2	62627.2	70528.2	69920	67790.3	65780.2	53143.2	82983	AminoAcid
111	P33338	SLA2	6549.54	6526.32	6567.19	6894.32	6802.83	5681.74	7559.88	8190.76	7521.37	6676.08	9000.84	9099.59	4778.06	6802.37	6122.98	6175.08	7195.58	6579.95	6264.45	7017.76	6686.94	7292.69	6730.42	6140.85	6242.9	5112.76	6950.13	Other
112	P37012	PGM2	59392.1	56763.8	57480.6	53352.2	55695.1	56470.4	41155.6	38782.1	38107.9	31645.5	31088.5	31997	14086	15245.8	15765.9	7937.69	7427.67	7140.69	5436.49	6630.12	5369.25	6372.09	6562.01	5942.53	4505.92	2983.35	4067.97	Energy
113	P38205	NCL1	10748.1	10384.9	10589.3	10974.4	11250.6	10722.5	13465.8	13898.9	13455.2	13895.9	16017.8	16456.8	9197.4	13709.7	12999	13247.7	14417.1	14304.6	13782.8	14020.9	13991.6	14605.5	14162.5	13486.3	13070.2	10468.5	15732.9	Other
114	P38968	SEC31	18601.6	18269.6	19341.6	17947.1	17095.3	17565.9	17977.7	19229.5	18879.9	18163.7	20746.9	22902.6	12567.4	16984.9	16796.5	16894.3	17871.1	18209.7	16949.7	19440.4	17636.1	20233.1	20100.1	19182.1	17275.6	15479.3	21891.9	Other
115	P40150	SSB2	3672.44	3556.67	3782.9	4239.04	4300.17	4030.02	5610.68	5642.52	5331.35	6105.56	7436.11	7363.72	4387.26	6520.88	6143.28	7458.92	7546.04	7348.49	7667.53	8719.14	7983.94	9275.71	9042.73	8745.05	8208.33	6803.78	10020.9	Chaperon
116	P41810	SEC26	6071.47	5804.62	5968.53	6111.8	6007.52	6242.7	7631.39	7571.39	7205.65	7165.12	8654.67	9260.75	4585.53	6385.43	6684.52	5924.81	6486.01	6349.23	5739.15	6375.39	6307.99	6172.2	6120.79	5734.38	5409.91	4573.05	6724.09	Other
117	P54115	ALD6	210496	197268	212747	264714	277581	279750	423471	431263	405676	486479	629490	680097	351963	493023	506380	490243	495894	450273	467650	364986	482743	294252	295469	284154	263566	210609	323053	lipid metabolism
118	Q02892	NOG1	4765.57	4826.08	5004.61	5978.8	6421.58	6403	10229.3	11353.7	9423.51	11927.4	14400	14617.7	9457	13800.5	13194.3	14831.6	14742.7	15601.2	14761.2	17183.1	16202.6	19314.5	18811.6	18963.2	17162	15081	23149.5	Other
119	P00358	TDH2	132978	134125	141716	128616	132722	141815	97903.5	90064.8	97498.4	77440.2	68024.4	66251	31510	37857.5	38089.5	31532.2	33175.7	32053	46080.3	56597.8	48310	61861.4	58589.9	60129.6	47452.2	47349.7	74838.6	Glycolysis
120	P00817	IPP1	157809	160184	162088	173218	170286	176794	191547	206572	196447	204627	223458	222544	125243	188376	179376	181410	189413	193376	188617	208365	192551	214749	213531	198789	184889	145835	210264	Energy
121	P04806	HXK1	452935	450639	458710	312724	303053	313552	188597	182607	177417	177268	186552	198328	104553	143581	131310	142582	148017	137519	145463	151711	150028	137838	143872	133488	122112	90531.6	125246	Other
122	P06103	PRT1	17900.8	17441.5	17365.1	19074.8	19341.3	19731.9	25434.3	26663.5	24388.8	27738.7	31027.7	31947.9	19663	28613.1	26263.5	29622.3	30341.7	30325.2	30740	33691.2	32334.2	34187	34631.8	32691.3	31046	24268.8	37773.6	Other
123	P22138	RPA135	4032.79	4307.23	4314.42	4575.89	4856.06	4776.65	6238.51	6581.61	5862.56	6381.52	7362.99	7823.93	4285.13	6060.6	6599.5	5804.77	6572.34	7153.52	6403.21	7352.46	7043.96	7378.73	7674.3	7207.86	6944.4	6199.66	9633.63	Transcription
124	P24276	SSD1	4396.2	3734.62	4125.59	3962.32	3893.89	3810.2	4255.8	4463.61	3948.24	4093.39	4390.44	4769.75	2387.72	3204.41	3355.38	2857.24	2987.99	2887.58	2791.64	3123.74	2948.44	3043.88	3091.58	3310.34	2641.28	2226.01	3255.41	Other
125	P32528	DUR1,2	190.231	168.029											112.738	123.054														Stress
126	P32558	SPT16	8900.08	9054.79	8957.35	9993.66	9520.56	9344.77	10949.3	11398.8	10737.4	10846.5	12088.7	13827.3	7347.61	9535.12	9800.79	9142.62	9480.73	10155.1	9667.28	10068.3	9932.8	10272.4	9640.15	8836.29	8224.8	7257.4	10468.6	Transcription
127	P40413	CCT5	17404.9	16963.7	17163.8	17848.6	17863.5	17755.2	21753.5	22982.2	20270.9	23127.7	25288.4	27425.6	14889.4	21606.4	21110.9	22065.3	22704.7	22689.7	21978.7	22025.3	22949.5	23290.7	23373.6	22184.2	21337.6	17370.6	26252.9	Other
128	P42945	UTP10	338.144	347.818	343.199	424.376	379.773	420.201	483.181	515.972	533.317	495.572		724.715	364.485	487.782		543.01	128.752	586.494	546.327	553.738	595.564	580.201	581.887	585.661	578.857	541.311	636.392	Transcription
129	P53978	HEF3	4456.69	3643.13	3504.23	4941.31	4172.41	3250.16	2018.83	2018.86	3322.65	1540.95	1480.51	1491.96	676.659															Tanslation
130	Q08179	MDM38	7720.88	8001.87	7844.71	9426.74	8890.41	8860.9	12717.1	12816.1	11277.6	12188.7	13978.9	14461.8	8302.64	11213.4	11014.7	10957	11883.4	12180.9	12361	12111.9	11851.1	11490.7	12266.9	10980.3	10875	8843.87	12356.6	Mitochodria
131	Q12460	NOP56	34185.4	33450.1	33913.1	35398.9	34071.6	33899.7	44529.4	45117.4	42941.6	48778.8	50020.2	55663	34094.7	48871.3	46041.3	52147.1	52391.2	54635.4	55966.6	56911.6	56755	62687.7	59993.3	59776	56462.6	45521.8	72691.3	Tanslation
132	P02994	TEF1	1.09711e+06	1.08127e+06	1.14997e+06	1.09937e+06	1.08732e+06	1.10025e+06	1.33683e+06	1.40129e+06	1.30541e+06	1.4137e+06	1.55708e+06	1.60905e+06	928366	1.36324e+06	1.2994e+06	1.42586e+06	1.47653e+06	1.47586e+06	1.49997e+06	1.54229e+06	1.50503e+06	1.57971e+06	1.54183e+06	1.46185e+06	1.39803e+06	1.10444e+06	1.64644e+06	Tanslation
133	P09435	SSA3	120328	130218	126633	131135	96791.8	124294	63517	51807.5	66428.1	35469.8	32224.7	38879.9	6551.27	3207.88	4275.84	971.15	640.382	1383.46	818.633	731.792	1207.2	854.906	1638.66	1224.68	491.036	558.599	1104.07	Chaperon
134	P14907	NSP1	5560.17	5473.31	5488.77	5938.04	5354.49	5333.15	6306.7	6593.15	6118.4	6661.75	7104.96	7354.3	4349.75	6190.81	5958.22	5743.38	6071.2	6419.85	5466.76	5951.86	5809.41	6010.15	5555.21	5400.26	5492.15	4051.62	6154.77	Other
135	P25582	SPB1	1145.18	1157.95	1230.02	1192.34	1204.24	1121.9	1772.09	1708.45	1392.97	1765.89	1924.42	1975.28	1182.53	1642.06	1753.76	1915.06	1816.66	1908.64	2234.15	2126.21	2200.34	2410.38	2200.62	2308.76	2172.88	2001.77	2868.63	Other
136	P37291	SHM2	137996	135486	143649	167768	166070	161090	219993	226133	213632	236859	263877	293767	162070	240006	229488	249495	255051	252616	264342	304888	276494	345355	337861	333814	321131	273663	429291	AminoAcid
137	P38009	ADE17	57726.7	56174	57565.4	73077.5	78636.3	71885.6	103562	107231	98055.2	113955	134722	133947	79862.1	118273	109246	121684	128268	131948	133491	156641	133984	158869	158887	153299	143489	116544	176897	Nucleotides
138	P39533	ACO2	13918	12580.9	14049.8	18341.2	18917.4	19325.1	27674.6	29421.1	26933	29259.9	33197.5	33300.5	19773.7	28874.1	26987.6	29457.9	29653.8	29835.7	28210.9	33037	29310.3	37908.9	37715.2	37187	34773.3	29943.5	48629.3	AminoAcid
139	P39683	NPT1	8935.83	9022.5	9458.18	8786.46	8973.2	9056.2	10275.1	10802	10788.2	10883	12045.9	12555.6	7086.02	9951.78	9690.35	10020.8	9621.06	10185.2	9139.31	10482.2	9952.88	10940.8	10731.1	10641.6	10412.3	7926.95	12249.8	Other
140	P39744	NOC2	2136.01	2099.01	2125.48	2438.81	2590.28	2393.89	3533.24	3330.19	2977.26	2956.25	3953.01	3805.53	2109.16	2910.27	3036.79	3054.15	3235.67	3176.32	3151.86	3383.98	3521.85	3089.83	3355.84	2548.08	2806.27	2514.8	3480.06	Mitochodria
141	P53914	KRE33	3722.35	3591.64	3609.57	4091.34	4109.96	3676.35	4954.79	5270.68	4389.62	4754.07	5894.77	6229.16	3469.24	4790.17	4959.76	4798.05	4695.02	5117.5	5098.14	5106.4	4498.18	5826.27	5544.97	5415.34	5223.67	4929.5	6601.94	Other
142	P54114	ALD3	20812.2	20352.9	19580.9	17180.8	17131	19846.1	11481.2	10630.1	12106.4	7380.56	7146.2	8522.39	2430.33	1935.57	1943.59	1181.55	1555.12	1874.11	870.431	2705.58	1255.47	2493.84	1578	1458.23	3427.67	1329.88	2694.49	AminoAcid
143	Q01574	ACS1	296430	286079	301747	273442	273096	272268	213121	212733	223115	182023	196559	210273	109874	139448	140903	106005	112078	109317	55474.7	11197.7	56770.3	3438.7	3230.8	5757.2	2357.32	1697.75	8009.25	Mitochodria
144	P00360	TDH1	210832	191176	188979	272538	231021	225878	181997	162295	165932	141350	124521	135990	46054.3	40540.5	41925.9	20860.6	19005.4	18576.4	19357.8	16304.4	17987.6	13814.6	13906.1	11768.8	8716.82	5261.89	7056.8	Glycolysis
145	P06169	PDC1	408816	411112	413290	403450	386121	390080	352621	342241	351510	306047	315688	368537	169655	217714	212162	212306	207557	225355	246852	275048	251647	327735	312723	335003	340326	298769	597113	Other
146	P11412	ZWF1	47892.5	48159.2	46090.9	46433.8	46212.7	47076.6	52267.6	54979.2	48904	52552.3	56394.8	59735.8	32644.5	47569	46911.6	45663.2	47299.1	45870.3	48065.3	52415.6	50194.7	56020	55933.8	55000.6	51212.2	41966.2	66673.6	Energy
147	P14540	FBA1	862079	897318	894785	969648	928152	970510	925041	925823	917552	892675	990738	1.05178e+06	509062	721439	709399	708872	735797	705229	686824	666454	700380	645109	642966	617612	562876	456862	667447	Glycolysis
148	P15625	FRS2	17815.6	17640.3	18095.8	18125.1	18940.1	18515.3	25014.2	26438.3	25485	28493.4	32744.8	32425.5	19958.2	29210.7	27195.4	30875.5	30897.6	31857.6	31525.4	33199.8	32546.6	36122.2	33920.2	34105	30749.3	25384.8	39160.1	Other
149	P16120	THR4	42603.8	42104.6	43656.5	48697.6	47086.3	47671.9	60331.1	63039.6	61967.7	62565.5	67953.4	74110.3	39525.9	54576	53676.4	51978.3	53650.9	55375.4	53868.9	53096	52528.8	53241.6	53769.8	51951.1	49387.5	38025.7	56142.6	AminoAcid
150	P22202	SSA4	90255	91983.6	88796.2	84861.5	73339.2	81914.8	41419.8	42251.7	41670.1	29669.8	27101.5	28601.5	7621.78	6042.03	6495.14	2714.64	3196.16	3715.37	2763.89	2378.89	3178.59	3512.35	3226.23	3428.89	2402.81	2195.61	3009.36	Chaperon
151	P25375	PRD1	6420.91	6698.62	6905.27	7363.12	6591.03	7233.74	8338.3	8336.84	8429.24	7910.19	8764.11	9445.85	5096.12	7127.74	8123.69	7142.46	7452.97	7743.44	7533.74	8141.2	7878.71	9169.37	8836.74	8689.12	8315.31	6682.06	10080.9	Mitochodria
152	P29453	RPL8B	204361	201206	202935	207501	214924	210049	279070	279143	280507	314955	342806	359287	211077	316246	287890	331686	340684	351048	340031	369211	348942	411512	410020	408720	382955	320210	487264	Tanslation
153	P30822	CRM1	3325.53	3558.87	3361.37	3194.83	3594.34	3363.51	3441.17	4111.43	3393.38	3212.16	4423.99	4287.05	2077.06	2776.91	2631.41	2528.3	2571.4	2699.98	2553.7	3097.24	2697.28	2533.94	2657.1	2509.95	2355.66	2127.23	2668.08	Other
154	P33734	HIS7	11768.7	11481.8	11897.3	13723.5	14201	14850.2	21720.3	22816.1	21403.9	22751.5	24112.3	25496.9	13733	19780.5	18532.3	17363.7	18795.3	18587.3	17790.3	18015.4	18216	18237.2	18512.4	17839.3	17108.8	13993.4	22332.6	AminoAcid
155	P38853	KEL1	1446.93	1398.91	1715.09	1377.37	1329.59	1297.64	1429.75	1403.61	1459.89	1368.42	1937.34	1621.97	829.768	1332.59	1334.55	1247.42	1383.73	1180.26	1178.21	1180.02	1538.49	1737.93	1185.01	1403.52	914.181	944.271	1161.75	Other
156	P39986	SPF1	3206.85	3160.31	3310.62	3865.21	3790.52	3664.21	5564.99	6072.62	5054.15	5188.94	7009.21	7199.51	3876.51	4907.69	5316.85	4817.48	5345.51	5694.12	4989.96	5564.51	5289.56	5417.02	5737.48	4988.97	4377.02	4694.32	5589.54	ER
157	P40010	NUG1	4614	4607.92	4811.93	5445.75	5780.49	5228.85	8298.88	8722.32	7635.67	8876.72	10341.1	10141.4	6577.88	9707.39	9146.09	9308.26	10192.4	10062.3	9975.29	9809.3	9938.62	10220.4	10189.7	9665.38	9543.07	8310.81	11790.9	Other
158	P40069	KAP123	16833.5	17117.5	17760.7	20389.3	19556.7	20228.2	27361.4	29047	26698.1	26971.3	34193.8	36584.1	19199.2	26548.8	28462.9	26124.4	28809	30312.5	28472.9	33863.9	29839	34469.9	34358.2	32316.5	28676	26950.6	36367.3	Other
159	P40215	NDE1	21002.7	19977.3	19770.9	25204	23779.9	21952.2	31342.2	31594.6	28590.4	29419.1	36926.5	38648.2	23817.1	32288.4	34819	32298.6	33794.4	36638.6	37880.7	38632.5	37192.7	37120.6	37226.3	35447.1	31746.1	25764	41263	Mitochodria
160	P49095	GCV2	6368.21	5946.51	6947.7	8945.22	9871.58	10940	17398.5	18340.9	16650	18161.4	20777.3	23075.7	11851	16376.8	16766.7	15825.1	16474.7	17074.7	15097	14270.1	15556.1	15102.7	14685.5	14688.7	13030.1	11891	17819.3	Mitochodria
161	P49367	LYS4	20464.1	19882.8	20974.5	23246.1	24639.7	24100.6	31641	31733.2	29464.9	30263	33314.5	35027.7	20483.4	28863.8	28151.6	28375.5	29569.2	28899.9	28989.8	30726	29268.5	32449.3	32040.6	31998.9	29713.5	24305.2	38445.2	AminoAcid
162	P80210	ADE12	34382.4	33613.3	34441.5	40618.8	43425.3	41381.8	60044.2	60903.1	57235	65365.1	72145.9	78798.2	45949.6	69609.1	64158.2	75036.6	76442.8	75113.8	79290.6	85506.7	84032.8	87434.1	86200.5	84012	75808.5	60479.3	93280.1	Nucleotides
163	Q01217	ARG5,6	23127.7	23317	23744.7	43833.5	44110.1	47771.4	75101	72828.4	71664.5	69320.1	72978.6	78138.6	36774.1	47615.3	46153.7	39201.8	42003.7	41104	38450.4	38783.8	39190.1	40508.8	42228.8	42457.4	38234.6	31169	49741.6	AminoAcid
164	Q12451	OSH2	1333.08	1294.82	1604.66	1565.49	2029.55	1613.14	1535.8	1458.89	1547.13	1832	1843.3	1270.37	906.012	1281.3	985.028	912.644	1301.69	1167.66	939.627	1323.62	1237.33	1163.82	1333.5	945.425	981.486	931.028	1037.88	ER
165	Q12754	RRP12	1365.71	1411.76	1575.79	1783.72	1846.96	1821.55	2405.86	2428.88	2229.24	2340.22	2767.28	3223.05	1921.05	2715.76	1814.11	2317.68	2994.95	2698.53	2483.14	2937.74	2702.82	2972.82	2858.29	2588.93	2355.16	2276.01	3075.75	Tanslation
166	P00924	ENO1	923524	1.03655e+06	960067	970868	937971	985044	651296	619268	632548	473785	468612	509792	161814	169660	158538	89106.7	91703.9	82068.1	94954.1	109993	96264.9	110263	111446	104638	90754.5	68359.6	100629	Glycolysis
167	P05030	PMA1	137059	139041	137226	192144	168573	172428	224242	232835	204147	180117	240099	238801	113297	143204	150408	127233	131034	138975	139018	197056	143844	206776	212495	192664	177123	172486	224616	Mitochodria
168	P12385	SUP45	12646.4	13281.1	13251.1	12305.5	12961.8	12607.6	15909.1	15768.9	15372.6	17112.2	18969.9	19816.5	12047.9	17006.3	16503.6	17651.2	18734.9	18729.4	17779.2	18662.7	18523.5	19446.9	19568.9	18761.9	17248.2	14318.3	20580.1	Other
169	P15424	MSS116	7534.49	7186.24	7966.97	8090.73	8211.37	8384.63	13891	14120.5	12369.8	15801.9	18860	20595.8	12728.4	19127.8	17662.6	22209.6	21427.8	21565.8	26545.8	29265	26786.2	32030.1	31155.4	29190.1	27313.4	22252.7	33211.4	Mitochodria
170	P17076	RPL8A	32433.1	31867.6	32145.3	40200.8	42939.4	43278.6	53475.5	57160.6	55739.8	65888.9	68473.3	72731.1	41964.1	66287.1	59561.7	65939.6	71261.9	70809.5	70435.4	76797	68684.5	76873.9	75679.7	75052	67882.5	56539.5	82083.1	Tanslation
171	P17967	PDI1	71109.2	72594.4	75517.7	74439	73741	76951.5	87435.6	90847.1	89103.5	89882.9	97803.4	98840.1	53277.3	73873.5	73136.9	68936.8	72168.6	70005.7	66104.6	67351.8	68733.1	69847	69016.7	67665.7	63533	50789.5	78274.9	ER
172	P27692	SPT5	4048.24	3743.43	3900.11	4164.72	3957.91	3809.68	5082.73	5317.9	4867.43	5206.84	6079.08	6253.04	3582.74	4893.63	5043.18	5294.34	5570.95	5125.41	5148.82	5497.94	5035.27	6066.87	6575.46	5870.4	5482.21	4670.77	6887.84	Transcription
173	P32316	ACH1	89102.4	87469.2	88931.8	107306	106947	111142	120608	122949	124981	123318	134322	143743	85879.8	129205	124393	139045	146645	146979	151743	174145	159424	127570	131924	118265	89323.2	64719.8	76843.9	Mitochodria
174	P32481	GCD11	16005.1	15634.6	16290.1	16925.1	16455.4	18003.8	23274.4	22612.4	22340.5	25134.3	29267.1	29907.4	18421.2	26956.8	25862.3	28773	29777.2	30357.1	31175.9	31205.4	31899.3	33219.3	32042.7	32035.3	29554.2	24071.1	36216.7	Tanslation
175	P34216	EDE1	8049.45	7588.35	8448.62	8181.09	7944.89	8267.49	9526.09	9886.76	8794.87	8788.13	10041.7	10578.2	6003.44	8215.21	8454.51	8151.13	8453.27	8757.9	7952.8	8493.91	8128.23	8098.63	8484.74	7747.68	7059.39	5764.04	8432.08	Other
176	P38811	TRA1	237.802			225.036	179.125		348.055	306.495		275.571	123.17		174.46	264.836			217.448		198.449				309.86		189.764			Transcription
177	P39522	ILV3	51393.1	52784.4	54206	63029.9	64024.2	65208.7	89340.5	92262.9	86159.5	93578	102796	109753	58900.5	84941.1	81238.7	81238.9	83447	78061.1	75975.5	87962.9	79207.2	100690	98765	95368	93594.5	80439.5	116231	AminoAcid
178	P43593	UBP6	9940.37	10666.2	10644.5	10741.2	9684.32	10852.1	11224.6	11525.6	10713.5	11030.1	11405.9	12517.2	6771.67	8865.4	8475.96	7935.38	8382.17	8212.44	7622.36	7708.7	7790.55	7404.65	7450.25	6757.72	6677.56	4990.56	7423.62	Other
179	P47035	NET1	1162.09	1304.94	1116.42	1380.35	1242.69	1318.3	1692.92	1901.75	1603.02	1827.81	2001.96	2165.03	1272.04	1615.8	1790.75	1606.8	1729.48	1859.83	1567.44	1797.81	1642.83	2041.01	1882.3	1787.57	1600.44	1334.32	1972.63	Other
180	P54861	DNM1	8135.6	7328.24	7741.28	8007.64	7925.28	7465.51	11390.2	11482.4	10458.8	12367.5	12870.7	14229.4	8655.89	12808.7	12591	13670.1	14217.3	14518.7	16188.7	17054.5	15742	16525.3	15732.1	15900.7	13230.5	9476.35	13752.8	Mitochodria
181	Q01163	RSM23	2899.72	2900.38	2955.91	3377.89	3789.72	3231.85	6185.97	6345.96	5845.1	6743.44	7635.35	7473.06	4662.35	6796.8	6111.79	6967.69	7773.43	7181.43	8079.69	9068.38	7803.18	9840.42	9466.04	8811.28	8597.61	6743.92	9558.19	Mitochodria
182	Q08208	NOP12	2377.81	2321.05	2312.55	2820.16	2837.73	2656.01	3865.94	4022.57	3575.35	4454.34	4834.75	4790.77	3098.35	4603.35	4197.74	4849.69	4986.72	4794.89	4827.01	4996.94	4821.13	5236.4	4997.55	4938.46	4845.15	4022.2	5908.68	Other
183	Q08965	BMS1	1451.32	1141.28	1238.21	1537.98	1499.02	1277.95	2082.73	2227.54	1762.68	2192.42	2549.52	2804.68	1663.86	2469	2298.53	2510.45	2721.28	2958.86	2621.87	3190.83	2749.82	3329.95	3107.98	3357.88	3217.36	2925.69	3553.08	Mitochodria
184	P04051	RPO31	553.61	597.321	595.818	625.056	600.09	548.63	784.844	806.903	734.719	918.413	988.337	1079.71	577.795	777.726	796.824	793.08	722.802	907.026	1015.47	935.254	981.368	917.724	959.789	867.225	745.571	779.578	1320.98	Transcription
185	P06101	CDC37	26007.6	25880.3	27116.4	22928.3	22899.4	23981.7	20444.4	20523.1	19991.9	20023.9	19723	22335.3	12132.5	16606.3	15423.7	15234	15126.8	14516.7	13982.8	13599.7	14198.5	13529.6	13936.8	13439.9	11423	9149.18	13526.2	Chaperon
186	P15624	FRS1	20197.2	19338.6	20734.2	19907	20405.7	21303	28367.6	28837.4	27366.3	30214.3	32758.4	35243	21350.9	30481	30440.2	34258.7	33025.3	33731.5	34189.4	35355.4	34286	38171.7	38435.3	37006.7	34085.1	27268.7	43015.9	Other
187	P15891	ABP1	17444.8	18825.1	19340.1	19831.1	18419.4	19041.8	22561.5	22709.2	20904.1	22665.3	25763.7	24987.7	15454.5	22601.3	20267.3	21764.5	23331.9	21837	19934.8	21906.4	20619.2	21136.4	21374.2	18835.7	17498.7	13955.5	18099.9	Other
188	P21954	IDP1	37221.8	36002	37793.2	36355.1	37855.5	39524.4	49250.2	50219.9	47966.6	54205.5	58076.6	61237.9	36173.6	54394.7	50706.3	54309	57078	58251.6	57986.6	63949.3	60026.1	63466.9	63021.7	60262.7	55725	43677	66942.1	AminoAcid
189	P25039	MEF1	4454.21	4039.54	4459.32	4427.27	4451.1	4403.32	8249.77	8447.61	7734.8	8867.49	9888.43	10896.9	6504.23	9454.47	9515.82	11286	11290.2	11878.8	12662.2	12675.4	12779.7	13777.3	13057.9	12820.1	11092.5	9534.34	14015.8	Mitochodria
190	P32266	MGM1	1671.75	1640.55	1715.14	1729.32	1818.11	1555.86	2007.99	1828.87	1903.78	2072.97	2334.58	2280.48	1396.58	1837.74	2117.93	2026.97	2057.63	2007.77	2199.8	2769.2	2267.63	2424.47	2512.46	2434.89	2484.23	1828.38	2413.92	Mitochodria
191	P32597	STH1	1264.29	983.501	1078.19	1163.47	1088.25	1094.05	1462.62	1336.65	1478.08	1509.22	1518.43	1962.28	1018.18	1307.62	1429.64	1472.23	1596.86	1686.4	1558.86	1785.28	1494.07	1596.87	1572.6	1530.72	1350.21	1129.64	1644.27	Transcription
192	P32796-2:P32796	CAT2	23400.3	24309.8	23596.5	24417.1	22163.2	23586	19712.3	20031.4	19011.7	18305.9	19662.5	19911.1	11219.5	15036.6	14680.8	13435.3	14490.8	13779.9	10264.8	5671.44	10221	3044.47	2696.06	3380.88	1812.15	1575.08	2224.3	Mitochodria
193	P32891	DLD1	22005.8	21853.4	21958.4	23184.4	23522.7	23396.5	30568.2	33276.9	29948.5	32662.4	37583.3	40870.8	25721.4	37424.7	35383.6	40008.8	39975.7	43512.3	44287.2	44139.7	47596.7	38682	40087.9	38161.5	33138.1	25370.1	35535.7	Mitochodria
194	P36008	TEF4	49115.8	46660.1	48370.5	53691.7	55547.7	55102.9	83592.7	84746.5	78845.1	91631.9	106875	110278	65569	98502.6	95466.6	109186	109155	111759	118750	128468	117948	136258	134030	128871	123485	98844	150957	Tanslation
195	P38219	OLA1	117100	119486	118586	98623.5	94956.4	94712.2	73881.2	75779.2	73550.3	73955.7	81295.1	84215.2	45843.3	72010.2	68405	73489.1	76189.8	75982.4	77389.7	84529.1	80923.8	93019.5	92887	91703.5	85037	70966.5	110876	Other
196	P38687	SRP68	4324.06	4213.07	4651.67	4255.92	4671.92	4138.33	5895.27	5920.06	5930.2	5724.6	6272.2	7120.56	3702.64	5342.73	5182.34	5358.32	4767.18	5863.44	5424.45	5263.93	5860.67	5204.54	4977.33	4771.02	4461.46	4021.03	5522.43	Other
197	P38720	GND1	132618	130872	141646	140279	164327	135495	191711	195348	184092	198492	217494	239230	139333	206199	196910	219139	224106	227469	229696	221637	236359	175702	166945	173880	164951	132190	233353	Mitochodria
198	P38788	SSZ1	37152.1	35352.8	36298.4	37658.6	39271.2	37518.9	51659.8	52726.6	49269.3	57923.8	63380.3	66083.4	39299.4	58208.5	54779.7	58395.6	61868.8	61003.3	60708	62148.7	60486	66966.4	65117	63323.4	59199.7	48461	73436	Tanslation
199	P38999	LYS9	62092.8	57187.2	58985	81055.9	76035.8	74621.3	103478	103086	97547.5	108937	122730	132918	76476.5	111441	100024	111818	117963	121089	114538	113871	118710	109977	109667	105765	97206.3	80167.9	122073	AminoAcid
200	P40563	AIM21	1925.31	1716.87	1470.57	1567.13	1357.01	938.53	1535.02	1570.41	1536.79	1779.63	2014.79	1880	1412.46	1841.14	1505.43	1876.83	1516.96	1892.87	1768.4	1688.57	1563.93	1742.11	1525	1267.09	1476.55	1049.41	1254	Other
201	P41811	SEC27	11220.9	10610.5	11550.3	11976.7	11650.4	11908.9	14382.5	15544.6	14059.7	14130.3	15731.9	18597.5	9895.64	13785.5	14152.6	14203.1	14400.8	14060.8	12832.7	15522.1	13938.4	17021.7	16211.3	15082.8	13189.8	10908.8	17235.9	Other
202	P53312	LSC2	52187	52446.2	54134.3	58153.7	58820	58271.1	67644.4	69214.7	67648.2	72500.5	77370.9	81964.6	48397.8	69591.4	67218.4	73783.1	72781.1	73629.4	65678.8	66904.4	69528.1	56194.4	56843.8	51545.6	43569.7	32626.5	41658.8	Mitochodria
203	Q08818	MSC6	1860.17	2059.64	1965.34	2018.85	2563.66	2348.76	3422.47	3216.43	3254.59	3407.59	4919.93	4637.6	2682.87	3788.52	4049.46	3756.69	4392.95	4634.69	5080.63	5790.5	5377.44	5663.5	5515.53	5540.9	5095.02	4113.11	5410.21	Mitochodria
204	Q12018	CDC53	2513.59	3177.61	3155.44	2953.83	2654.92	2621.35	2978.3	2950.36	2721.19	2708.97	2951.03	3609.68	1593.13	2221.68	2140.57	1935.6	2050.57	2101.43	1895.52	2136.87	2198.47	2246.01	2172.04	1876.7	1929.34	1684.3	2632.16	Other
205	Q12176	MAK21	881.588	910.402	1249.37	1074.29	1222.06	1231.5	1621.54	1638.99	1433.13	1504.27	1838.46	1919.64	1081.41	1458.95	1376.92	1454.35	1528.11	1705.77	1428.96	1592.5	1698.26	1725.58	1574.49	1452.66	1304.14	1288.52	2012.91	Other
206	Q12466	TCB1	3027.77	2795.77	3155.87	3116.57	3086.81	2967.48	3349.33	3375.95	2869.98	2451.73	3892.92	3784.72	1819.85	2553.2	2115.71	2088.4	2436.26	2585.76	2305.93	2404.3	2401.14	2626.96	2388.25	2053.37	1703.1	1704.15	2131.89	ER
207	P04802	DPS1	77645.6	73938.2	76361.2	69866.1	69315.6	71366.8	80637.5	80084.4	78003.1	78045.2	80843.5	88795.6	47535	66269.6	64317.4	59143.6	60735.1	62218.4	61934.2	61310.5	61868.7	64442.7	63541.2	61883.2	57570.4	45197.8	71378.3	Other
208	P10869	HOM3	29714	29683.1	29863.8	37119.7	35945.4	36447.3	40230.2	38943.4	37999.9	35954.6	36437.3	39871.5	20173.1	24836.6	25085.7	23403	23538.8	25541.5	30228.1	34613.8	29066.8	40536.6	42431.5	40268	40884.5	32743	50997	AminoAcid
209	P15180	KRS1	39129.1	37980.6	39969.5	42779.9	45518	45051.2	54120.1	57136.3	54072	57664.4	62639.5	66225	37858.8	54329.1	51759.1	52641.8	53197.2	55549.8	55829.4	58157.9	59518	63179.7	60564.8	61373.8	57122.7	47350.1	75004.5	Other
210	P16547	OM45	164383	158563	161125	164875	179739	175272	142367	139310	144362	121904	117431	123908	55300.2	67697.3	63783.9	40357	40089.7	39011.8	29979.8	30080.2	31708.8	19627.9	20275	18638.1	12921.2	8695.42	11571	Mitochodria
211	P16862	PFK2	59087	60658.8	62266	59894.8	58359.6	61656.7	60057.6	61076.2	59106.5	57941.7	63980.4	71790.4	38335.2	53121.9	52757.6	55020.1	53340.5	56233.5	58589.5	64063.7	58469.7	64436.1	64368.6	61168.2	55124.2	46086.5	69124.9	Glycolysis
212	P18759	SEC18	6249.26	6180.56	5572.21	5597.9	5623.52	5848.5	7704.36	8579.45	7760.28	8667.28	10022.2	9860.36	5662.53	8032.81	8480.01	8528.01	8617.05	8692.56	8841.96	8993.94	9366.54	8901.29	9840	8928.68	8001.35	6509.18	9549.46	Other
213	P19358	SAM2	219595	207889	220572	206141	223692	211516	245036	255461	249454	280693	323349	334907	195757	286513	286095	328696	342677	318839	348138	380840	365555	382821	376418	364989	336410	275517	410035	AminoAcid
214	P21538	REB1	3236.92	3248.04	3010.73	3576.58	3930.24	3822.68	5764.89	5894.35	5350.66	6170.24	7023.61	6755.1	3954.78	5846.91	5631.47	5765.68	6333.33	5698.53	5335.07	5607.52	5264.66	5393.52	5634.09	5129.03	5405.46	4084.4	5476.93	Transcription
215	P22276	RET1	829.21	809.231	919.727	883.514	1034.31	839.754	1170.76	896.485	1085.27	1139.62	1634.96	1665.5	911.861	1247.77	1287.28	1212.59	1157.24	1385.19	1531.85	1474.51	1326.9	1336.43	1501.81	1418.55	1401.42	1153.22	1756.16	Transcription
216	P25655	CDC39	1134.2	1233.66	1160.19	1380.54	1492.48	1329.85	1698.97	1614.95	1522.27	1621.02	2036.4	2071.89	1146.1	1422.2	1668.1	1415.68	1263.55	1488.59	1510.89	1519.31	1487.16	1374.8	1460.29	1328.56	1202.25	1021.47	1299.46	Transcription
217	P28240	ICL1	29259.9	29275.3	29616.9	42745.3	46755.1	45535.8	52915.7	54898.7	55071.8	60396.9	59762	67446.2	38588.7	51502	51727.7	37230.5	36617.4	37041.5	32597.7	35282.6	34142.5	17294.8	18203.2	16326.2	8849.92	6816.64	7416.64	Energy
218	P28274	URA7	6011.03	5852.44	6146.39	6895.21	7011.52	6755.38	9234.58	9674.78	8865.65	10355.6	11010	12043.6	6996.63	10161.8	9459.78	10473.8	10542	11053.9	11286.4	12171.4	11758.6	13752.6	12716.2	12939.8	12190.7	10089	16826.9	Nucleotides
219	P32340	NDI1	50479.6	48490.3	49079.4	58566.1	57504.7	58565.3	71862.3	73296.8	66583.5	67764	84906.4	86038.6	54069.1	77664.1	73538.9	70955.1	82918.8	83341.8	86369.6	98314.8	85460.8	73329	83352.2	69523.8	59128.9	47767.2	52962.8	Mitochodria
220	P35732	DEF1	15549.7	15901.6	16350.3	16113.7	16947.6	15740.1	19953.5	20352.5	19605.6	22420.1	23799.4	24233.9	15107	22397.6	20750.1	22535.2	23144.7	22639.5	22749.2	24447.5	22873.6	23604.5	23700.7	21740.4	20848.1	17105.7	23302.9	Stress
221	P36421	TYS1	24121.9	22734.9	22009.4	27091.1	26392.9	25180.5	40456.1	38964.2	36247	42579.8	44315.5	48497.2	28051.3	40031	36923.1	37602.3	39383.1	40838	42384.6	41036	40605.2	41638.1	42351.8	41452.7	39408.6	30175.1	49964.1	Other
222	P38081	YBR056W	10462.4	10131.5	9867.23	10251.7	9312.46	9920.64	9015.52	8517.88	9516.44	7484.41	8322.63	8753.85	3735.78	4179.82	3891.38	2983.31	2830.76	2664.44	2686.82	2540.64	2815.96	2524.89	2638.99	2254.26	2118.49	1608.6	1798.73	Other
223	P38625	GUA1	20406	19655.7	21909.6	23472.6	23250.1	23350.3	32246	33492.1	31113.6	34974.7	39934.9	40153.2	26575.5	38251.5	35803.6	39999.3	42285.2	43871.6	44010.3	46340.8	44472.2	50471.8	49183.3	48184	47414.8	38412	59026.4	Nucleotides
224	P39936	TIF4632	11476.3	9513.94	11813.1	12339.4	12045.6	13140.5	19914	22124.6	18014.5	22297	28371.5	29740.3	16446	25015.8	21306.6	21392.1	25826.5	23250.6	25534.1	25491.4	23947.7	26988.5	27964.8	27228.7	23492.5	20423.4	28685.5	Tanslation
225	P40047	ALD5	11635.5	11193.5	11334.7	17673.2	17970.1	18485.6	27101.9	27594.1	26924.9	27566.8	29935.1	31388.3	16671.9	22818.6	21748.9	22298.1	22640.9	22891.3	18866.5	15784.9	19073	19043.4	18341.5	18020.8	18114.1	15667.5	24254.9	lipid metabolism
226	P41921-2:P41921	GLR1	27802.1	29062.1	28508.6	24516.2	22385.3	23911.5	22479.1	22737.2	20723.6	20604.6	23307.2	24484.5	13593.2	19319.4	19203.1	18593	18688.1	17770.8	17742.1	19031.7	17693	20454.2	20352.2	18938.2	18480.2	14732.1	22262.8	Stress
227	P47079	CCT8	21551.5	20389.2	21034.3	22366.4	21407.8	22674.5	25828.4	27558.2	25390.7	28554.7	29114.4	32041.2	19634.2	26477.1	27182.2	28332.3	28309.5	29758.8	28557.9	28127.6	29549.6	30034.7	29587.6	28681	26909.5	21901.5	32342.2	Other
228	Q03195	RLI1	24367.9	23745.7	24017	23687.7	23563.4	22759.9	28136.5	28713.7	26147.5	27945.3	32009.6	34765.3	20945.4	28583.8	28596.6	29033.8	29981.3	30169.5	31154.1	32012.9	31905.3	31958.2	31008	30191.6	28979.1	23734.9	36234.7	Other
229	Q08647	PUS7	1869.65	1854.53	1880.79	2075.47	1924.84	2002.03	2717.58	2723.85	2383.29	2841.01	3046.07	3376.89	1961.15	2798.23	2645.94	2914.73	2962.75	3139.62	2880.15	2925.73	3070.38	3211.12	2997.87	2916.8	2948.13	2451.46	3740.31	Other
230	Q08822	CIR2	8177.84	8030.91	9005.91	9669.77	9027.92	10153	11545.7	11626.5	11166.2	13115.1	12386.5	13971.4	8641.37	12403.1	12310	13508.4	13830.7	14417.6	12736.2	12135.1	12015	12170.8	10915.3	11128.4	9536.89	7527.24	10820	Mitochodria
231	P06738	GPH1	18360.8	18087.3	19051.7	17268.8	17746.4	17679.6	13485.4	13592	13413.2	10713.6	11954.7	12725.4	5575.82	6878.12	6399.66	4927.44	5527.71	4721.81	4089.96	5430.22	3848.84	5839.41	5603.86	5126.47	4246.31	3155.35	3466.73	Other
232	P06786	TOP2	424.897	431.338	450.849	547.245	598.537	542.277	813.118	902.628	736.416	776.023	1065.56	1207.3	602.531	831.809	835.156	787.543	900.778	816.038	787.681	812.743	846.751	766.398	727.175	717.237	625.626	552.998	782.649	Mitochodria
233	P10659	SAM1	25443.6	22377.4	25396	26784.5	28606.5	28780.8	45175.5	48088	45747.3	54792.5	62085.2	66494.1	39123.5	64355.7	59942.2	74804.8	82263.8	83273.6	90367.8	99290.9	89999.9	110401	109795	108686	103740	86421.6	130442	AminoAcid
234	P15019	TAL1	180321	169511	165351	174598	165504	161045	166989	166968	171500	166809	166969	190753	108415	142423	143361	142622	139499	151410	149795	145732	153686	116938	115303	112435	101147	78193.8	124304	AminoAcid
235	P28273	OXP1	1614.1	1910.12	2073.31	2108.82	1908.17	1756.89	1974.32	2232.46	2103.36	1656.56	1963.93	2290.73	1170.26	1498.49	1623.54	1192.52	1421.88	1680.89	1542.45	1507.78	1504.85	1446.34	1423.12	1165.8	1041.2	946.153	1188	Other
236	P32190	GUT1	6821.64	6368.33	6414.15	8362.87	9617.81	7377.86	10586.2	10825.5	9215.44	10764.4	12704.1	14110.1	9245.52	14224.6	13172.4	16690.8	14405.3	16179.9	14885	11865.1	12143.9	10182.6	10285	8841.73	7090.07	4892.82	5163.52	lipid metabolism
237	P32527	ZUO1	49263.8	48519.7	49427.9	53509.8	50692.2	52692	70750.6	70315.8	67520.3	76784.2	86265.4	88533.8	51907.6	77321.8	72204.7	80913.4	84187.5	82445.7	80527.5	83381.9	83735.5	88751.3	86941.3	83678.2	80402.4	64668.9	104205	Chaperon
238	P35844	KES1	18317.1	18296.6	16917.8	18839.6	17373.8	16758.4	21057	20584.6	19391.8	21371	22339.6	25334.6	14320.9	20077.1	20099.6	19213.6	19384.6	20009.5	19435.5	22046.6	19345.8	22979.1	21967.3	21730	20324.5	15961.1	25250.4	Other
239	P38707	DED81	20355.7	19264.9	20205.8	21008.5	23149.6	22495	34647.7	35427.3	34066.2	34530.1	37641	41881.2	23510.1	33125.7	30731.7	31585.8	31376.4	33647	33966.6	34827.3	32944.4	36774.6	36473.1	36057.1	33827.6	27974.9	42709.5	Other
240	P39077	CCT3	21516.4	21719.4	22599.2	22991	22490	22500.8	28662.3	28231.2	25925.4	28958.1	30431.4	32348.5	19509.8	27041.2	26578.7	27397.4	28862.5	28819.5	28659.6	29128.3	28697.1	30272.3	29561.5	27550.1	27396.5	22019.2	34495.2	Other
241	P39518	FAA2	14124	13700.9	13002.1	14972.9	15389.7	14392	14847.3	15860.3	14778.9	14105.8	17509.8	17324.4	10261.1	13809.9	14450.9	13073.1	13150.8	13702.7	10193.5	6670.69	9779.55	3635.15	4115.88	3476.36	2761.79	1833.78	2158.69	lipid metabolism
242	P40477	NUP159	1123.67	1025.05	1061.97	1137.25	1075.81	1023.75	1126.74	1126.08	1220.74	1129.88	1355.28	1371.81	694.296	1092.25	864.429	985.514	1114.64	1114.23	991.278	1124.47	958.715	1043.43	842.54	1072.82	958.103	770.973	995.077	Other
243	P41807	VMA13	11746.8	11181.4	11821	12504.4	12601.8	13027.9	15164	15786.1	14385.6	14552.6	18027.5	18177.1	9868.18	13052	14310	11591	12322.8	13503.3	12317.9	13244.5	12701	14323	13313.2	13125.3	12263.4	11257.4	15754.1	Energy
244	P46672	ARC1	25174	25490.5	25702.1	25249.4	25486.1	23431.1	30243.8	28943.4	28342.4	31504.3	34065.7	36011	21251.2	31535.9	30770.4	32664.6	33321.4	33938.7	33342.3	35846.7	32751.1	37761.4	38298.1	36726.7	32735.7	26259.8	39914.2	Other
245	P47771	ALD2	4233.45	4361.03	3498.74	3420.19	3515.05	2925.88	2173.32	2230.31	1982.73	1716.14	2054.74	1541.66	778.343	905.428	875.487	721.542	540.208	529.885	679.085	601.982	638.55		493.073	471.273	463.021		510.425	Other
246	P49723	RNR4	185003	181319	180868	180275	170674	180154	166900	166992	161671	145522	153749	160714	69514.1	87838.5	83957.5	74757	79129.2	75414.2	65280.7	56027.3	65556.2	55873.3	56547.1	55541.8	52082.2	41979.7	63311.3	Nucleotides
247	P53254	UTP22	1249.25	1193.85	1321.45	1525.55	1553.28	1654.83	1933.35	2070.06	1905.96	2009.38	2343.42	2278.23	1351.99	1790.56	1733.11	1776.09	1041.41	1912.28	1922.76	2324.97	2081.21	2145.65	2102.01	2123.56	1829.17	1406.42	1934.62	Other
248	P53261	NOP7	5647.11	5884.69	5343.09	6900.7	6545.46	6464.36	9158.55	8662.28	8245.74	8703.95	10560.9	11354.7	6457.1	8530.31	9107.71	8943.63	9071.77	10609.4	10039	10682.7	10374.5	10923.8	10379.9	10306	9771.92	8797.7	12268.7	Other
249	P53883	NOP13	3601.11	3698.37	4305.97	3964.39	4432.24	4159.88	6699.87	6778.04	6169.69	7901.67	9049.48	8686.75	5338.82	8373.19	8117.18	8824.2	9223.06	9347.3	9716.07	9629.86	9775.46	10124.9	9488.96	9233.86	9821.25	7934.89	11183.8	Other
250	Q04439	MYO5	2016.69	1950.12	1964.43	1955.76	1800.54	1978.65	2239.24	2390.54	2095.78	1922.22	2307.74	2481.73	1214.29	1682.91	1716.18	1699.31	1675.79	1756.18	1651.69	1650.43	1863.33	1529.48	1591.4	1704.2	1420.55	1169.05	1977.91	Stress
251	Q06625	GDB1	2685.2	2450.26	2854.4	2351.7	2368.85	2776.87	2057.28	2060.47	1972.81	1281.99	664.724	1724.88	470.003	715.563	1138.88	426.735		568.353	614.389				447.95			402.358	578.378	Mitochodria
252	Q08977	YPL260W	24498.9	24273.2	25143.2	24510.2	23785.4	22952.7	28062.2	26981	25949.2	27880.6	29372.8	30276	18591.4	25768.9	23364.4	22123.6	25196.2	25260.7	25745.2	24997.3	25337	23094.1	24841.8	21255.1	20705.9	15899.4	22886.8	Other
253	Q12031	ICL2	24274.2	21846.3	22586.6	23044.9	23199.1	24189.2	25101.9	25682.7	23773.2	25833.7	29841.9	30432.4	19926.4	29315.9	30138.3	35131.5	32956.9	34476.4	26783.6	12184.4	26805.7	5664.25	5916.09	4907.18	3124.26	1984.74	1978.46	Mitochodria
254	P07257	QCR2	153520	147457	153647	164833	170435	172757	211008	210149	207243	234506	266293	277980	162151	246045	230867	255948	261985	262842	267564	311391	277490	292418	294483	271476	240526	181955	248369	Mitochodria
255	P07262	GDH1	74034.2	66013.5	79496.1	112224	136270	123326	280287	309267	277943	351364	406947	437898	277504	421390	394561	415490	418363	411135	384409	373511	400038	385215	382394	370336	348485	284455	423031	AminoAcid
256	P12709	PGI1	225111	219658	215106	220411	212989	204048	189448	193906	180126	168374	182476	206079	104126	140552	138232	134678	134763	142007	144032	146870	143195	142344	139131	133917	119947	93098.9	144223	Glycolysis
257	P19657	PMA2	3834.37	3577.38	3413.57	3886.81	3293.02	3849.27	2290.44	2121.11	1981.08		1307.48	1344.28																Mitochodria
258	P20447	DBP3	4014.5	4073.56	4280.32	4151.85	4660.67	4226.49	6799.64	7375.85	6316.34	8146.44	8939.24	9755.69	6945.13	10680.3	9376.25	11249.8	11741.7	11810.7	12353.2	13400.1	12453.9	14816.5	15250.5	14068.9	14724.6	11503.6	17097.8	Other
259	P21524	RNR1	3334.27	3178.71	3683.49	4635.28	4912.35	4606.24	8135.05	8168.46	7249.22	7912.3	9218.19	10291.3	5749.52	8257.2	8586.93	9107.61	9706.01	9684.35	8965.13	9901.62	8634.47	12076.5	11638.6	11140.8	10928.2	9347.19	14474.9	Nucleotides
260	P23254	TKL1	41599.1	39371.1	42513.8	54137	55200.5	53267.7	92582.6	98826.6	91137.8	103605	120522	128566	77138.6	111232	110752	114123	119016	119527	121359	131040	124560	116045	115559	110099	100556	84914.6	126389	Energy
261	P32497	NIP1	9714.45	9783.33	10153.4	11442.6	10623.8	11038.6	14556.6	14279.8	13424.8	13804	16870.5	17742.2	9937.27	14235.4	14593.4	14090.3	14914.7	15647.6	15736.9	17251	15754.2	16822.8	16722.9	15057.9	14678.8	13189	17956.3	Other
262	P37898	AAP1	3337.49	3084.62	3446.93	3542.56	3487.12	3724.75	4563.33	4827.06	3930.02	4265.6	4970.72	5325.18	2809.53	3792.08	3947.37	3485.36	3999.86	3856.85	3879.65	4095.76	3872.13	4517.71	4016.12	3940.17	3839.25	2966.49	4402.44	Other
263	P38431:P38431-2	TIF5	14002.7	14589.9	14431.7	14812.6	15971.4	16547.5	20768.6	21340.6	20448.9	23316	24978.9	26302.8	15550.4	23279.8	22677.4	23888.8	26025.7	24861.1	23960.1	25535.9	24272.7	26625.5	26758.5	26042	24521.1	20057.2	30509	Tanslation
264	P39002	FAA3	1909.95	1837.71	2849.45	2508.62	2252.95	2416.59	3683.44	3836.5	2981.2	3801.96	4845.15	5620.09	3019.6	4868.12	4762.22	4178.39	4829.92	4721.01	4141.16	4085.3	3782.07	3966.08	3994.38	3578.96	3480.74	3168.91	4356.43	lipid metabolism
265	P43123	QRI1	8374.29	8723.79	8739.93	7030.17	7943.7	7640.85	8263.24	8583.91	7803.68	8423.54	9050	9444.55	5423.04	7668.68	7008.03	6704.33	7836.56	6852.69	6529	6712.68	6824.79	6279.21	6266.21	5931.99	5442.68	4554.53	6368.21	Other
266	P43609	RSC8	2966.14	2988.41	3369.83	2954.19	2940.65	3014.34	4232.93	4265.95	3952.6	4445.91	4648.41	4850.84	2957.63	4138.79	4008	3941.1	3802.25	4014.69	3848.61	3947.35	4007.85	4092.25	4433.33	4218.31	3872.48	2957.46	4456.35	Transcription
267	P47037	SMC3	614.136	693.793	691.404	702.297	713.398		710.692	887.663	700.159	806.648	944.048	778.969	518.526	755.842		656.39	780.368	1000.71	734.431	922.385	802.762	744.645	748.915	700.974	535.378	502.412	1106	Other
268	P53742	NOG2	1230.92	1192.12	1362.84	1439.63	1770.96	1516.27	2731.13	2979.64	2383.48	3306.71	4095.78	4360.37	2588.77	4339.08	3332.29	4777.75	4543.66	4478.48	4537.75	5303.04	4948.99	6130.34	6351.31	6031.89	5761.88	4687.86	7675.76	Other
269	P54113	ADE16	18797	18575.4	20009.1	18033.2	15947.3	17495.2	16956.9	16810.2	17158.3	15809.8	17506.9	17678	9522.51	13419.7	13762.5	13608.4	13554.7	13179.6	11982.9	12917.3	13296	13366.6	12867.4	13018.8	11625.2	10180.8	14252.2	Nucleotides
270	Q04373	PUF6	7282.19	7176.35	7481.13	7033.63	7263.63	7087.31	8871.1	8902.2	8487.68	9062.29	10266.1	11483.1	6728.84	9529.56	9237.92	9781.16	10065.2	10256.7	9714.52	9821.45	9983.5	9854.72	9733.05	9742.68	8796.2	7433.92	11041.9	Other
271	Q05911	ADE13	69629.1	63698.1	66759.8	65098.5	68331.2	62051.3	88226.5	84889.9	79152.3	97414.2	102449	107625	66230.9	100576	89863.7	95585.9	106090	106025	113797	107690	105151	99783.3	108244	96141.3	99214	77739.8	121236	Nucleotides
272	Q08245	ZEO1	142082	153283	146164	150532	149328	150698	159818	159553	154663	155557	165504	158435	94058.4	135439	119501	124733	129769	122543	131315	134516	121540	126586	122408	104336	105310	79596.2	110560	Mitochodria
273	Q12250	RPN5	22237.6	21796.9	22767.4	21274.1	20532.2	21590.6	21013.1	21509.5	20659.9	19960.1	22298.7	24107	12269.4	16147.5	17130.7	15242.1	15938.6	16413.7	15519.5	15007.6	15944.5	13528.9	13398.9	12956.8	12051.5	9790.07	14592.7	Other
274	P06106	MET17	386356	372202	403581	391721	417354	431238	514870	544604	503459	553592	621478	649290	381521	566776	522341	570088	599106	595711	604699	616995	622718	553307	555612	529445	473647	359898	522567	AminoAcid
275	P07170	ADK1	124163	122501	126254	118238	122972	122262	131363	133857	130744	138349	145649	152204	96368	137108	133074	147780	149909	150726	166624	199533	175419	192135	192619	182229	164946	128702	181740	Nucleotides
276	P11075	SEC7	1327.6	1155.65	1299.17	1399.11	1391.05	1577.69	1492.55	1780.36	1558	1401.64	1727	1730.95	936.229	1552.58	746.678	1305.73	1504.97	1445.67	1297.64	1418.17	1365.62	1286.2	1222.58	1065.62	989.17	968.056	1324.14	Other
277	P12612	TCP1	21630.9	20473.5	20988.3	21290.1	22268.2	22108.1	25509.5	27541.7	24589.5	27186.1	28542.4	31697.1	18006.7	25352.4	25384.5	25831.9	26328.7	26936.6	25946	25887.3	26339.9	27415.6	27666.3	26029.5	24703.7	19539.3	30424.7	Other
278	P12687	MRP7	2732.04	2752.95	2724.57	2942.52	2889.26	3070.56	5253.16	5496.3	4856	5649.21	6667	6623.19	3874.07	6075.73	6090.48	7077.86	7013.62	6759.17	7359.02	8239.55	7251.35	7301.5	7650.45	6967.49	6623	5246.92	7490.67	Mitochodria
279	P14742	GFA1	37426.8	36503	36938.1	35896.3	33010.4	33815	32625.7	31909.7	31971.1	30971.6	32674.6	35580.5	19872.4	24597.7	24088.1	24035.4	22898.5	24411.1	24196	24027.3	24276.4	20993.6	21167.3	20096.4	18796.7	13938.1	21435.4	Other
280	P22579	SIN3	1429.89	1506.15	1540.76	1641.27	1397.21	1484.89	1958.27	2016.77	1952.55	1932.85	1491.13	2822.82	1179.27	1342.7	1737.21	1607.84	1725.94	1597.82	1308.24	1841	1656.75	1668.56	1667.06	1577.64	1466.44	948.737	1671.31	Transcription
281	P26263	PDC6	1042.33	1167.34	1034.32	1222.31	789.996	900.181	236.114	608.724	247.063	280.577	152.726																	Other
282	P26785	RPL16B	113167	112900	115207	121317	126738	128340	168070	173589	159679	182729	206853	230723	129863	192646	183078	211376	210704	217019	206847	232297	215226	247105	244202	239441	224429	188338	280785	Tanslation
283	P32657	CHD1	252.564	249.633	240.346	298.72	294.566	316.315	383.546	482.142	414.643	460.402	536.122	595.456	301.788	449.455	405.474	466.595	430.833	520.559	420.322	456.673	480.193	377.662	503.675	539.182	411.645	384.4	398.907	Transcription
284	P32790	SLA1	2185.01	2098.82	2051.51	2374.7	2097.18	2183.49	2793.41	2865.02	2648.17	2698.23	3043.5	3183.73	1663.1	2373.95	2191.65	2408.71	2334.89	2218.07	2205.58	2290.21	2043.42	2322.94	2200.68	1896.54	1911.27	1694.12	2375.14	Other
285	P32861	UGP1	32574.5	31588	30818.2	31110.2	30958.4	30487.2	32010.4	33050	30595	31942.6	33888.7	35167.2	18993.9	26149.2	25053.2	23604	24119.9	23168.7	20783.4	22251.2	21275.6	22193.9	22155.9	20014.8	19200.6	14684.4	22123.4	Other
286	P33322	CBF5	24107.9	24860	23165.6	24304.8	23560.3	25304.7	27617.2	30133.4	27853.6	29343.8	33292.9	35452.5	20290.6	30787	30266.4	30965.7	31139.2	32483.7	33519.1	34137.8	34183.6	36377.7	34906.3	33496.1	32636.8	26748.6	40347.6	Tanslation
287	P33330	SER1	32868.4	32752.6	32591.2	34552.1	32816.7	32398.7	41394	41900.4	40482.2	44353.9	47401.1	52042.9	28592.2	39174	38709.2	40871.9	41556.7	42464.6	45495.2	45503.6	45003.5	46514.6	44124.6	44666.3	41886.4	34159.9	56727.3	AminoAcid
288	P36049	EBP2	6343.6	6523.02	6527.03	7296.03	7769.03	6852.49	10106.8	10836.1	9561.24	11427.6	12319.1	12489	7711.67	11322.8	10336.6	11286.3	11887.4	11895.8	11811.5	11594.2	12109	12665.5	11858.1	11451.2	11199.9	9205.65	13828.1	Other
289	P37292	SHM1	30069.4	30140.7	31936.1	30542.7	31422.4	32360.4	44079.4	43812.3	43426.7	46873	52138.7	53828.4	32024.1	46491.2	42728.4	45088.2	47638.8	46455.4	42620.9	40908.4	43418.6	40187.7	40285	37903.9	34992.9	28445.5	42373.8	AminoAcid
290	P38427	TSL1	7647.57	7764.64	7727.94	9676.31	8458.13	8901.66	9840.96	9555.01	8782.19	7146.06	7935.68	8463.81	3348.43	3707.52	2995.29	2003.94	2031	2313.99	1685.32	2621.42	1624.9	2091.8	2313.89	2197.7	1605.76	1107.68	1634.38	Other
291	P38791	DYS1	10041.2	9643.46	10552.6	9807.32	9903.04	10269.3	14320.1	15483	13831.5	15620.7	18553.1	18761	10950.9	16325.2	14781.4	17033	17521.6	18003.1	17873	18912.9	18081.1	23090.3	23169	23594.7	24425	19885.2	32430.1	Other
292	P39015	STM1	70984.5	73448.5	73898.2	69703.4	72701.5	74365.6	96075.8	98651.9	95425.7	106012	116034	119646	73160.1	110260	104734	118260	123522	121601	123925	138146	129765	151544	149569	145125	138156	113365	167719	Tanslation
293	P39676	YHB1	84091.5	75218.4	85964.8	103152	116469	113940	190228	187298	169923	246761	269039	293977	201099	303096	285637	328810	328653	317085	366177	399786	383341	377693	391698	351316	305231	232702	320646	Stress
294	P40462	TMA108	1524.08	1434.75	1498.58	1395.08	1406.61	1233.97	1923.24	1856.55	1757.4	2023.46	2236.34	2387.39	1356.83	1669.98	1774.14	1721.78	1583.93	1945.37	1977.56	1894.01	1935.39	2379.26	2300.98	2114.02	2107.59	1591.82	2485.77	Other
295	P41939	IDP2	96548.9	94173.5	95843.2	89966.8	89197.8	91746.3	86723.4	90337.8	87868.1	86885	89104.9	94696.7	57365.3	84268.1	78049.3	75995.6	72513.5	75358.8	71121	79207.7	74868.9	36900.7	39798.3	31361.6	21759	12674.5	11093.5	AminoAcid
296	P43535	GCN20	5832.02	5798.48	5511.76	5541.69	5756.85	5612.96	7880.09	7903.22	7573.52	8659.07	8278.29	9533.72	5528.54	7654.78	7541.38	7283.08	7848.76	8365.61	8274.43	9097.16	8361.77	10456.4	9925.45	9843.3	8540.26	7422.34	11053.2	Tanslation
297	P43616	DUG1	44114.3	46451.2	47445.7	38646.6	39897.9	45253	43514.3	43653.4	41815.3	43799.3	47620.3	50850.2	27759.2	39346.6	38060.7	37851.6	40189.7	39235.7	37386.1	41816.2	38375.7	41067.1	40773.3	38406.5	34655.6	27386.5	38039.1	Mitochodria
298	P48582	BRO1	2670.95	2852.96	2211.77	2821.57	2978.94	2327.14	2658.37	2694.88	1707.66	2521.46	1938.72	3358.6	1695.82	2018.86	1458.47	1813.3	1674.21	1433.45	1701.01	1757.6	1390.81	2490	1700.22	1259.33	1433.61	2847.16	1602.31	Other
299	P52910	ACS2	34247.6	29189.5	34345.1	38577.1	41693.7	41322.6	78952.3	80217.1	74464.1	87272.2	102166	112023	64800.8	92004.9	91923.7	89057.3	92315.9	94792.2	106109	125272	110273	123999	123526	117166	106067	85956.5	121712	Other
300	P54838	DAK1	20152.9	20684.8	20905	19092.5	20109.8	19739.2	19697.8	20048.3	18387.5	18280.5	19614.8	20746.9	11678.7	14869.3	14733.4	13389.8	13513.5	13367.1	12205.2	12453.2	12099.7	12471.9	12538.4	12364.8	11564	8897.24	13272.4	lipid metabolism
301	P89105	CTR9	1523.39	1268.07	1173.4	1548.91	1534.25	1136.23	1838.07	1863.47	1772.64	1704.46	1919.36	2207.34	1260.54	1688.47	1653.15	1388.48	1630.1	1972.25	1614.44	1703.93	1588	1872.34	1920.88	1632.79	1487.78	1398.12	1943.9	Transcription
302	Q01477	UBP3	1004.24	1057.95	1118.64	1048.2	1022.44	1135.54	1427.56	1657.81	1264.14	1512.43	1794.73	1858.74	999.118	1465.69	1396.15	1598.17	1638.08	1555.56	1538.78	1816.05	1794.85	2040.06	2010.82	2002.69	1853.02	1582.44	2394.41	Other
303	Q02776	TIM50	5423.86	4849.88	4828.59	6162.17	6305.87	6553.75	11109.2	10656.7	9853.23	11457.1	14236.7	14350.4	8633.35	12572.8	12797.9	13456.1	13926.5	13805.5	14357.3	14863	14407.3	16144.4	15107.9	14638.1	14234.7	11927.8	15751.8	Mitochodria
304	Q04660	ERB1	4062.69	3844.62	4006.21	4258.96	4362.15	4331.29	5741.11	6709.62	5390.53	6345.77	7328.75	7289.79	4556.1	6336.96	5954.42	6171.2	6846.91	6548.41	6749.38	6451.66	6415.43	6443.46	6476.15	6652.03	6182.95	5402.32	8040.95	Other
305	Q04728	ARG7	16235.6	15462.6	17170.3	24393.3	24950.6	25689.1	34105	34957.5	35825.6	31005	33642.8	33966.2	14845.6	19115	18616	13127.4	13864	13569	12193.2	12819.2	12689.4	16263.2	15324.3	15309.6	14910.2	13113.7	21322.2	AminoAcid
306	Q07551	YDL124W	70472.7	63588.1	75323.2	67597.2	64067.6	68086.1	51610.1	51793.1	53879.7	43277.1	41762.4	44503.2	18157.9	20977.1	20822.9	14822.7	14815.3	14060.5	12817.6	13645.8	12565.6	9951.85	10082	8901.17	8002.93	5638.98	8877.86	Other
307	Q07878	VPS13	443.292	285.205	461.583	292.802	280.3	491.004	421.636	348.119	527.392	187.251	381.028	339.115	269.521	112.233		111.771	284.909	448.721		413.37		124.016	73.8394	171.85				Mitochodria
308	Q12428	PDH1	48228.4	47745.1	47124.8	43143.5	44833.5	43009.8	52793.5	55076.5	49673.8	61631.5	66108.8	74230.9	47073.5	72487.5	68604.2	86244.8	90811.2	94588.9	86822	62842.9	88060.8	40399	39994.7	35940.9	28236.2	21442	25560.1	Mitochodria
309	Q12499	NOP58	23972.2	22249.6	23225.3	24516.7	23781.9	23688.5	31349.1	31334.9	30377.7	34384.6	36698.8	37715.2	23506.1	34057.3	33666	36811.7	35917.1	37274	38530.6	39675.3	38906.8	42380.5	43321.3	38585.3	39287	30907.2	45463.1	Tanslation
310	Q99287	SEY1	2531.08	2539.92	2828.5	3045.37	2742.9	2826.69	3165.52	3810.2	3158.12	3176.02	3471.11	4666.42	2274.43	2965.79	2305.23	2416.32	2433.36	3145.23	2970.54	2972.75	2760.02	2860.59	2633.63	2399.42	2314.4	2234.46	2571.31	ER
311	P00331	ADH2	748229	505010	906325	721856	524084	605750	592890	501848	734974	538326	843210	819768	298642	440871	606930	463301	464735	407198	189676	86999.8	185999	95713.9	93264	89713	76800.2	49116.5	33586.4	lipid metabolism
312	P00549	CDC19	346542	370282	360610	368083	338092	370964	319753	334655	338472	292060	312902	354607	156262	205480	211003	197281	210351	203026	209747	221425	220290	224433	221494	222021	212967	178387	306327	Glycolysis
313	P00890	CIT1	164382	147332	142013	169582	154281	143646	189984	178757	162295	199724	207676	231283	147153	208285	218453	266633	257096	281129	337779	350899	327239	299558	282534	269575	219171	145915	203622	AminoAcid
314	P00937	TRP3	8875.44	8483.38	8873.11	11678.9	11682.8	11805.3	19518.5	20156.3	18970.2	20927.4	21147	22488.3	11648.3	16094.6	15140.8	13016.5	14705.9	13154.5	13490.7	14024.7	13076.9	14342.1	13991	12910.3	12868.5	10466.1	15882.2	AminoAcid
315	P04173	LEU2	103264	100016	102799	98557.6	100057	97246.8	106093	111424	107873	116295	126254	133141	80407.8	119276	111197	123123	129885	132208	138640	137139	138333	119611	120839	112794	102940	79672.8	115401	AminoAcid
316	P07244	ADE5,7	31816.1	32962.5	33184.9	39448.8	38896.4	38991.9	53600.3	56468.2	49798.9	58347.3	63998.8	71490.6	41488.7	60346.7	60235.9	63193	64986.2	67462.3	67565.1	70244.8	68185	71633.1	68934.9	70016.3	62222.3	52744.3	84557.8	Nucleotides
317	P07278	BCY1	50096.4	51502.8	52115.5	40274.1	37970.8	43159.8	31269.1	32248	32029.5	29283.4	28733.8	31094.2	15976.3	20709	21096.1	18207.5	18379.3	18655	16843	15528.2	17094.6	14387.8	14398.6	13629.1	11710.2	8959.26	12143.3	Other
318	P07284	SES1	43892.5	43475.8	46768.9	39857	39197	40577	43255.1	43079	42383.8	46962.5	52656.6	56117.7	33160.9	49946.7	45746.6	51815	55706.1	55154.7	57050	58293.7	58452.7	58217.6	58514.1	56973.1	51307.9	40592.7	62302	Tanslation
319	P25087	ERG6	87798.4	83440.5	89001.9	141857	147796	144272	225682	231352	227321	218176	238231	263532	123979	160359	152787	125675	124863	117231	85968.2	68108	86868	63149.4	62142.8	57798.1	55147.9	44185	63031.6	lipid metabolism
320	P25386	USO1	503.346	450.45		560.012	464.765	384.164	735.351	427.695	361.171	643.79	466.4	742.366		364.858	542.829	578.974	738.874	263.013	446.505	580.752	372.055	718.398		516.637	274.048	426.885	542.464	Other
321	P26784	RPL16A	58045.8	61995.6	69037.7	56755.1	63201.3	61896.8	75975.4	82225.1	79026.4	91545.3	107139	100201	60182.7	95600.8	87079.5	92308.8	101072	96086.6	99129.9	106957	102316	119108	113601	113685	107321	89329.2	136343	Tanslation
322	P26786	RPS7A	191222	194052	194914	213318	206928	219883	289987	291165	278597	324563	335156	376310	208960	302418	292236	325201	338972	334976	338957	372010	346427	404461	394505	380217	367264	305011	448212	Tanslation
323	P27929	NAM9	3026.59	2753.65	2894.59	3274.94	3437.01	3580.17	6110.59	6415.57	5598.02	6727.94	7868.38	7475.27	4710.92	7440.27	6707.13	7988.25	8149.88	8328.6	8451.65	10032.6	8883.22	10420	9672.05	10075.7	9217.18	7334.5	10322.6	Mitochodria
324	P32457	CDC3	9594.99	10157.8	10266.4	9855.9	9356.01	10156.8	12260.7	12953.8	12378.5	13269	13390	14642.2	8210.03	11802.9	11073.6	11350.7	11690.1	11816.5	10148.1	11696.4	11730.9	10993.3	11659.3	11181	10227.2	8078.05	12302.4	Other
325	P36037	DOA1	2802.57	3375.52	3248.75	3304.91	3185.78	2731.47	4154.72	3890.41	3194.22	3925.85	4160.59	4013.98	2724.95	3449.8	3582.5	2665.94	3255.47	2705.18	3322.79	2908.43	3389.41	3538.68	3778.49	2729.7	2585.75	2181.77	3241.33	Stress
326	P36046	MIA40	6893.94	7353.71	7262.91	7078.32	7706.39	7542.02	9225.16	9835.63	9065.78	9878.39	10970	11028	6493.76	9700.73	9177.71	9847.73	10631.4	10122.4	10974.6	11940.1	11701.6	10851.1	10977.1	10095.4	9234.93	7093.01	9356.84	Mitochodria
327	P38230	ZTA1	9615.66	9021.63	9714.47	10771.8	10411.1	12048.1	11900.9	12100.8	11994.6	10448.1	11639.1	11947.1	5322.39	6629.58	6394.79	4803.27	4912.19	4284.81	3010.46	2398.78	3131.02	1472.73	2045.16	1474.3	1240.34			Other
328	P38250	IST2	4259.96	3879.91	3770.94	4153.29	3803.92	3404.58	3714.81	4548.64	3501.76	3119.47	4191.02	3780.03	1963.54	2764.35	2489.53	2559.77	2713.91	2558.75	2475.35	2845.77	1975.34	2435.98	2298.53	2039.97	1884.75	1974.52	2291.67	Other
329	P38254	PBY1	2621.43	2172.71	2122.93	2549.82	2071.68	2278.46	2342.74	1980.82	2228.53	2260.69	2203.28	2676.02	1283.43	1985.69		1182.79	2046.05	2124.53	1876.01	2054.7	1360.4	1726.16	1761.04	1946.52	1829.29	1424.36	1812.98	Other
330	P38682	GLO3	11340	11562.2	11543.2	11171.7	11677.7	11280.3	13112.5	14024.7	12171.2	14585.1	15991.7	15881.8	9236.41	14161.3	13148.8	13683.2	14236.2	13095.6	13011.1	13982.8	13341	14870.7	14623.7	13199.8	14059.9	10939.1	15753.8	Other
331	P38737	ECM29	880.991	792.796	923.801	1089.76	837.442	830.493	1047.83	1355.23	1265.14	982.764	1284.72	1434.95	801.139	913.67		1028.67	1195.5	866.887	1027.78	1172.12	950.788	963.623			1009.62		1044.63	Other
332	P39960	BEM2	637.571	846.38	780.62	798.853	856.294	695.096	877.929	1017.58	799.616	823.706	1166.91	1147.25	596.069	752.825	892.804	774.679	942.593	976.581	706.432	972.902	798.282		959.781	813.095	683.521	570.26	795.529	Mitochodria
333	P39976	DLD3	8653.69	8017.41	8746.09	10214.4	12150.4	11547.4	25678	25865.6	24198	35495.7	39822.1	43452.8	27515.3	41158.4	40807.7	45904.5	45670.7	49038.6	58061.5	57472	61075.2	59662.9	58733	58607	59409.1	49848	86243.5	Other
334	P40016	RPN3	20897.5	20139.4	21350.2	21663.9	19332.3	21848.8	20566.3	21590	21668	18303.1	23346.6	24123.7	12003.8	16478.3	17091.9	13631.5	15184	15841.1	15085.7	16188.3	15441.7	14732	15136	13865.4	12380.7	12071.2	15604.1	Other
335	P40327	RPT2	19559.6	20191.5	19826.2	19803.8	20167.2	20881.3	20051.7	22341.3	20797.8	20668.1	21918.6	24102.8	12330.5	18094.5	17002.4	16281	17136.4	17110.8	16855	16724	17484.3	16844.9	17186.5	17727.9	15062	12797.8	19680	Other
336	P47912	FAA4	17059.8	16704.8	17899	16886.8	16047.1	15803.6	14399.7	13728.9	14193.5	13026.2	13241.4	16752.6	8716.73	11160.4	12050	10961.4	10676.6	11058.2	9971.16	8755.79	9371.7	6607.64	7305.15	6406.04	6109.99	5334.36	7123.44	lipid metabolism
337	P49089	ASN1	28324.9	28244.1	28510.8	36978.5	36262.1	38972.4	56691.6	58566.7	55954.1	57127.2	63813.1	66341	33637.8	46423.5	45968.4	41583.2	42451.9	43412.4	41252.9	39187.5	44217.1	45828.7	45533.1	45856.1	43734.1	38443.2	64255	AminoAcid
338	P50101	UBP15	2677.62	2690.06	3664.19	2486.86	2520.81	2798.51	2387.09	2732.32	2552.81	1872.67	2594.3	2322.27	1228.71	1678.98	1694.94		1355.88	1292.42	1035.91	859.835	917.131		895.181	946.497	942.802	858.377	1367.07	ER
339	P53326	YGR266W	3287.98	3412.2	3655.98	3196.15	2932.54	3082.88	3697.6	3264.41	3240.8	3098.69	3894.72	4012.89	2254.26	3027.91	3298.23	3265.81	3337.15	3380.11	2976.28	2893.31	3076.56	2371.34	2446.19	2420.1	1947.11	1654.14	2407.06	Mitochodria
340	P54839	ERG13	48826.3	46028	49356.9	52563	59142.8	55349.3	87772.8	88293.4	82898.9	94631.3	100170	116189	58054.2	80320.5	74172.1	71999.1	72434.7	70325.5	68715.9	72349.3	71820.6	70877.9	68608.4	65897.7	60535.5	49207.3	71992.6	lipid metabolism
341	Q01476	UBP2	1343.88	1113	1339.69	1503.2	1377.5	1189.23	1479.58	1347.08	1582.85	1426.77	1682.39	1734.53	806.371	1059.59	1096.89	1100.09	1023.1	1151.39	1029.27	1148.04	1226.23	1133.67	1043.04	1057.89	905.455	964.302	1198.89	Other
342	Q02959	HOS3	505.721	482.656	497.632	506.013	527.865	483.974	741.104	819.865	737.112	768.262	945.798	939.902	638.157	786.031	978.173	880.231	877.387	771.395	832.071	829.019	847.243	951.606	874.517	723.95	624.999	584.816	857.582	Transcription
343	Q06010	STE23	2452.93	2467.96	2816.31	2656	2609.21	2482.41	2926.54	2815.22	2504.72	3073.09		3377.82	1687.98	2309.94	2296.39	2683.32	2917.71	2773.53	2498.39	2714.02	2920.56		3071.97	2790.69	2410.97	2155.3	3108.65	Other
344	Q06106	MRD1	603.529	555.6	908.486	847.289	877.345	856.816	1459.93	1355.21	1420.95	1647.7	1921.86	2307.95	1206.63	2014.21	1756.04	1851.04	2107.58	2216.44	2184.42	1888.12	2293.77	2088.93	2140.99	1959.63	1887.89	1712.59	2847.59	Other
345	Q08911:P0CF35	FDH1	106171	103162	105424	118039	125774	116650	57089.9	55475.9	60602	43175.5	40796.8	41177.9	19248.6	23306.9	21150.3	14587.9	16406.2	14887.6	6219.38	5160.9	6296.31	13165	9804.43	12369.4	5346.46	6793.53	8599.57	Other
346	P00830	ATP2	327640	308625	315105	374062	423268	397305	524352	513273	528016	565971	705666	698013	384544	564092	521576	607187	632280	618553	605143	660685	617903	631393	631149	582812	513071	388353	523228	Mitochodria
347	P00950	GPM1	875548	914915	872775	1.02166e+06	923612	900733	741824	751622	703639	617972	611005	717983	294158	355186	330680	318106	320212	329851	358457	356385	342568	335518	337486	322749	313327	254916	413952	Glycolysis
348	P07251	ATP1	266770	265701	269925	320661	335447	339942	440767	438363	428969	462613	510306	549696	322346	471419	469592	500752	516567	515714	526389	592319	529309	551119	554632	508520	443549	343044	445872	Mitochodria
349	P0CX38:P0CX37	RPS6B	187594	195663	214105	202392	208729	221477	274611	285755	275340	298039	340723	362359	206156	301618	286186	320703	331842	345427	341765	370674	339895	419722	410777	404011	388356	320732	478916	Tanslation
350	P13663	HOM2	100118	90509.8	96290.1	112369	104951	110125	140210	140647	135463	133373	136112	153535	75867.5	97369.2	104412	89855.3	88916.2	97980.8	94842.1	103409	97348.3	110487	103084	107482	95928.4	71143.6	122626	AminoAcid
351	P14904	LAP4	27920.7	26535.4	27784.8	26944.2	25727.2	25954.5	28229.3	29783.2	25790.9	23589	22862.7	25823.4	11627	14385.4	14019.9	10921.2	10794.2	11500.1	10379.3	10549.4	9658.05	11920	11132.3	10273.1	8836.49	7536.88	10446.8	Other
352	P16387	PDA1	48299.9	49099.5	51025.9	50890.9	51293.7	52925.3	59834.4	63430.1	60636.7	63714.2	76656.5	77839.2	43051.3	64256.4	60158.9	63221.4	66664.6	64208.9	55504	56309.2	58705.9	53294.7	53793.3	49842	44284.2	35639.7	51523.7	Mitochodria
353	P16467	PDC5		5280.81	2517.66	3488.67		2529.81	2137.88		2388.09				1279.6					1601.73		2434.8	1725.48		2551.48	2386.95	2116.35		4663.03	Other
354	P17555	SRV2	15029.8	14387.8	14999.4	15022.7	13603.9	15845.3	16892.3	18432.6	16845.8	17531.8	18943.2	19360.1	10500.4	14946.8	14951.2	13873.1	14121.2	13870.9	13902.9	12911.4	13592.4	12888.8	13357	11633.5	10638.8	8634.99	12435.4	Other
355	P21264	ADE2	19925.5	19780.4	20219.2	22512.5	22650.9	22928.2	30203.3	30593.3	27791.9	31956.5	33897.2	36144.6	21666.4	29714.1	29616.2	29078.4	31449.2	31195.6	30518.6	31384.4	31203.1	31975.4	32628.9	31127.1	30000.4	24218.5	38660.2	Nucleotides
356	P22336	RFA1	5876.18	5674.47	6384.81	6027.78	6270.09	6057.21	7249.61	7461.45	6818.43	7192.86	7869.24	8450.78	4949.33	6818.88	6489.4	6484.03	6540.92	6628.54	6251.77	6025.02	6376.45	6029.22	5933.99	5671.51	5188.34	3963.39	5955.75	Stress
357	P22768	ARG1	130257	118084	124240	182080	169794	179010	262143	260546	256720	248102	253516	293798	123112	144998	152469	101943	99877.2	103906	103045	113610	104547	127747	121198	128516	115658	90452.5	164183	AminoAcid
358	P23248	RPS1B	24444.2	25248.9	24515.4	26251.9	28327.8	26303.2	35048.5	36896.3	33796.6	38958	45676.6	45953.3	25525.7	39731.2	37516.5	41643.1	45127.4	41914.5	43276.1	50133.7	44925.4	56088.1	54491.6	52361.9	51983.1	42364.7	62390.9	Tanslation
359	P23542	AAT2	31315.2	29937.8	31378.6	34816.7	35873.4	36744.6	52854.2	55429.6	53423.9	56349.4	62177.1	64491.7	37033.1	52159.4	48514.5	50068.2	51924.2	52283.2	55373	61912.4	56329.3	66044.5	66540.2	62710.8	58159.3	46626.7	66452.1	AminoAcid
360	P31116	HOM6	91866.3	90359.2	85302.9	101629	95290.7	89027.6	127307	124062	114543	133232	135944	152257	88930.3	110346	120664	121303	118829	134200	130682	123589	123905	126399	111357	123642	107167	76583	144243	AminoAcid
361	P32074	SEC21	6733.61	5849.92	7346.75	7744.57	6813.56	6951.53	8275.71	8789.73	8382.28	7834.38	9710.92	10801.8	4985.65	7356.36	7328.56	6353	7258.67	7246.25	6489.51	7436.81	7046.32	7369.73	7876.63	7242.87	6120.44	5448.05	8264.6	Other
362	P32521	PAN1	3437.92	3443.88	3700.78	3243.39	3011.18	2849.75	3153.54	3558.77	3286.7	3330.52	4208.42	4621.58	2292.12	3086.6	3482.31	3347.06	3601.72	3455.68	3598.05	3715.21	3357.13	3421.88	3693.78	3085.4	3005.65	2433.38	3762.9	Other
363	P32599	SAC6	31518.2	29970.3	30143.3	31302	29893.7	29485.7	31841.9	31271	29367.2	29152.2	31805	33718.8	18936.6	24696.3	25677.5	22412.6	24163.6	26727.9	24939.3	24323.7	24515.8	25505.7	27047.4	24198.3	23303.5	19601.7	28117.9	Other
364	P32916	SRP101	3063.28	2651.51	3010	2964.12	2886.44	2540.4	3237.45	3308.2	2829.47	3157.08	3515.91	3390.21	2089.32	2641.32	2537.51	2969.79	2773.14	3091.47	2652.55	2425.66	2884.25	2361.34	2434.86	2458.01	2274.4	1515.82	2767.33	ER
365	P36112	FCJ1	12280.4	13469.1	12777.6	13395.6	14855.5	14524	19328	19588.2	19047.6	20785.9	24231.3	24484.7	14860	22055.4	21081.6	22656.2	24750.5	23674.3	25798.2	28754.7	26377.4	23916	24776.4	22290.3	19528.6	14736.4	18571.6	Mitochodria
366	P38631	FKS1	2918.26	2584.66	3665.64	4256.09	4452.29	3294.31	7053.62	8588.74	5377.61	6843.62	8597.16	7547.27	5166.73	6352.48	6996.24	7207.05	7182.53	7274.57	7393.73	8279.21	7117.01	8394.1	8585.52	7832.92	7919.62	7110.15	8875.51	Mitochodria
367	P39078	CCT4	22452.4	20604	20891.9	22142.6	22200.3	21294.4	25430.7	26392.6	25667.4	27026.7	28729.7	30263.4	18135	24876.8	24386.7	24988.7	26250	26017.1	25068.9	26472.5	26376.9	26721.4	26226.4	26442	24145.8	19377	30959	Other
368	P39101	CAJ1	9762.3	10072	10588.8	8845.56	9370.02	9021.24	10181.4	10036.5	9900.44	10098.7	10517.1	11441.7	6356.58	9561.68	8366.77	9302.28	9567.37	9862.33	9225.48	9343.39	9332.85	9301.04	8976.9	8310.35	7932.35	6231.18	9113.04	Other
369	P40032	TPA1	3262.34	2963.84	3402.91	3457.18	3476.05	3690.15	4407.47	4644.47	4230.56	4843.08	5090.31	5353.91	2989.29	4170.25	4375.51	4009.42	4008.14	4410.32	4451.95	5101.28	4544.16	4555.77	5133.69	5050.76	4967.83	3780.55	6472.86	Other
370	P41805	RPL10	174983	176071	183199	184716	188307	202987	253774	255804	255124	270989	316152	317373	186334	286772	271796	297100	305370	301668	305941	340594	315832	368100	353372	351154	332108	272947	417057	Tanslation
371	P42943	CCT7	12600.2	12215.5	12688	13767.1	12867.5	12963	15177.7	15963.9	14656.6	17116	18449.2	18804.5	11467.5	16025	15323.3	15528.5	16512.4	15497.3	15633.1	15091.9	16806.8	16084.9	15510.4	14812.9	13689	11666.3	17154.1	Other
372	P47008	SFH5	9387.58	9899.57	8804.26	7494.39	7910.17	7179.12	8358.83	8743.08	8062.78	9289.47	9990.87	9901.16	6461.44	8737.53	8780.33	8727.91	8830.24	9064.03	8558.82	8169.69	8828.77	8735.43	7765.95	7944.99	6856.31	5666.45	8331.2	ER
373	P53228	NQM1	79579.2	88039.8	79143.2	63778.4	54889.4	70971.3	37410.2	32457	38154.2	21477.5	25704.6	26350	8127.13	7688.58	7608.94	2132.64	2031.19	2358.41	1611.45	2271.64	1627.68	846.761	941.909	847.041	1359.69	729.934	1789.55	AminoAcid
374	P53235	YGR054W	7349.33	7646.5	7253.69	8638.21	8485.59	8367.99	11933.2	12421	11978.7	13568.4	15542.6	16267.2	9835.98	14310.4	14155.5	15843.9	15885.9	16912.2	17196.8	19317.5	17181.4	20727.4	19171	19096.2	17594.4	14890.8	21276.3	Tanslation
375	P53885	MDG1	5633.87	5708.08	5704.1	5299.02	5258.79	5031.01	4618.53	4913.57	5216.14	5096.65	5420.48	5794.53	3104.67	4673.84	4773.66	4742.44	4641.05	4779	4056.98	4285.02	4319.12	4370.46	4079.94	3961.24	3233.97	2499.96	3817.48	Stress
376	P54781	ERG5	3537.21	3253.62	3351.25	5123.84	4892.45	4644.06	9865.6	9498.63	8610.73	8469.81	9711.51	11309.3	4909.61	5325.44	6100.8	4515.51	4893.92	4654.95	4416.88	4743.88	4327.61	4960.8	4940.84	4644.47	4509.6	4350.52	4968.52	lipid metabolism
377	Q01852	TIM44	13200.3	11862.2	13535.3	11916.2	12748.6	13305.7	17886.7	19412.6	17760.7	20325.9	21554.8	22887.4	13922.5	20426.7	19777.2	21417.3	23450.9	21926	24621.3	24083.8	24520.6	23763.7	22509.5	20418.5	19618.3	15645.9	22198.4	Mitochodria
378	Q03280	TOM1	333.205	356.152	308.752	288.308	346.953	298.388	359.816	332.163	324.028	267.83	389.582	357.476	189.919	288.675	361.718	206.632	262.291	271.553	273.889	288.686	266.948	315.317	348.292	206.315	198.971	142.993	210.134	Other
379	Q04279	SEG1	1282.45	1298.1	1428.51	1335.87	1435.09	1148.34	1754.67	1492.24	1902.83	1572.13	1812.06	1919.61	997.584	1395.05	941.2	1378	1294.99	1483.72	1359.05	1414.73	1348.21	1594.58	1603.57	1490.34	1448.57	1127.34	1627.86	Other
380	Q07527	TRM3	456.637	395.296	458.686	506.432	493.228	434.416	530.187	675.76	469.137	434.442	599.267	787.474	420.068	657.541	324.911	408.964	330.495	511.625	419.558	398.919	493.105	341.786	526.133	480.622	366.38	293.302	466.959	Other
381	Q12109	WRS1	7966.42	7835.38	7498.78	8241.6	8075.08	8222.54	11678	12445.2	11560.5	13057.7	14610.3	15128.6	8844.75	12937	11637.1	13283.6	13632.6	13737.6	13515.8	15017.8	13858.5	16564.5	16220.8	16349.5	15751.5	12598.2	19268.7	Tanslation
382	Q12220	DIP2	832.002	1090.31	887.245	949.509		763.403	1152.08	1499.01	1005.24	1209.07	1238.81	293.053	828.217	1187.54		1148.49	1289.09	1232.1	1339.63	1640.45	1256.84	1470.92	1551.94	1373.43	1331.15	1241.09		Other
383	Q12449	AHA1	47817.4	50559.2	51879.8	44199.8	41470.1	40311.5	30521.6	31754	32045.3	27506.9	29436.4	30527.3	15967.8	22251.4	21142.7	21308.6	21498.9	21235.4	21929.3	22292	21625	21688.4	20960.5	20467.1	19157.5	14724.2	22594	Chaperon
384	P00330	ADH1	218532	238473	242895	256659	251282	253265	344942	350099	337777	402559	461957	493641	271713	404461	392377	503118	524663	486257	485358	450492	483010	399942	410311	387220	349501	266959	405405	lipid metabolism
385	P04807	HXK2	46852.4	49510.7	48324.2	49736.8	49183.6	47929.1	66827.2	65776.3	61724.1	73467.3	82774.5	91055.7	55999.7	79718.7	77025	91594.7	95040.8	95165.6	107531	130319	112692	135638	136840	130860	126735	103068	150981	Other
386	P06115	CTT1	10918.3	9095.85	9743.6	7519.77	6859.79	7168.18	3780.22	3529.51	3645.61	2156.42	2172.12	2194.58	473.146	382.738	692.403		1354.55	466.33							387.717		1589.39	Stress
387	P06168	ILV5	316620	293856	318426	350953	369886	360062	518548	550089	516096	570823	610531	644566	367657	522268	516610	536760	554197	552575	511501	455452	518702	465950	456391	434735	406410	332187	475362	AminoAcid
388	P08524	ERG20	76977.7	77675.9	81379.7	92565.7	92653.4	92685.6	133919	134257	126879	127387	149826	159103	86953.2	114048	115292	108075	108376	117508	110907	110464	109039	106778	108478	105895	97691.5	78949.9	117324	lipid metabolism
389	P0CX36:P0CX35	RPS4B	336025	326752	330134	356347	353571	372358	462151	464850	444122	514909	568354	589613	343628	512504	483207	535347	551707	568516	571576	641904	574125	700688	691760	669153	636381	525029	801300	Tanslation
390	P14065	GCY1	59864.8	63003.7	62432.5	61701.1	62670.8	65534.6	47098.1	46536.3	47682.8	35806.9	35478.8	36390.6	15226.4	18464.3	18860.5	13028.8	13461	13032.1	12818.2	9906.48	12340.3	4450.76	5546.29	4959.97	3076.08	1822.5	7946.41	lipid metabolism
391	P14743	NMT1	2778.85	2736.59	2794.01	2224.28	2254.43	2392.39	2910.71	3381.45	2858.58	3233.4	3742.98	4432.61	2400.53	3538.05	3537.66	3363.86	3489.94	3715.48	3735	4094.73	4013.04	4624.98	4630.31	4291.82	4279.97	3269.69	5396.92	Other
392	P15274	AMD1	3694.13	3619.1	4242.32	3424.19	3424.26	3580.45	3799.44	3826.73	3305.79	4119.52	4703.51	4576.35	2764.28	3873.61	3613.56	4378.41	4237.6	4198.79	4519.8	4645	4608.09	4480.61	4248.08	4242.57	3817.11	3117.55	3980.7	Nucleotides
393	P16140	VMA2	47000.5	46151.3	50777.1	46358.6	48439.8	48016.5	60714.4	62917.5	58950.4	67312.5	72200.8	78255	43349.7	63747	60543.5	64317.8	68123	67568.2	62936.5	74345.9	63408	80614.9	81619.2	80074.4	76116.7	63259.1	93919.6	Energy
394	P16603	NCP1	3606.25	3456.79	3720.88	4677.75	4535.59	4089.94	6581.38	6599.21	5973.59	5544.59	6522.65	7453.68	4139.62	4468.35	4348.18	3121.12	3640.76	3975.79	3050.93	3552.03	3602.17	3543.52	3400.86	3628.49	2913.23	2363.67	4222.98	lipid metabolism
395	P17536	TPM1	34268.4	36192.2	32619.9	31070.9	33065.9	32614.6	34926.4	38180.6	34021.1	37342.3	37305.6	38466.6	21993.5	30116.1	30605.7	29055.2	30645.6	27687.6	28510	28143.6	28350	25958.4	26276	24323.4	23744.5	19718.4	26616	Other
396	P17883	SKI3	553.099	468.919	470.082	471.141	463.876	494.103	558.244	630.382	448.175	591.199		648.785	352.31	562.868	546.67	436.797	565.459	479.085	544.589	543.765	446.125	620.323	501.394	462.482	401.713		478.739	Other
397	P31384	CCR4	2680.95	2313.1	2579.92	2752.35	2764.18	2635.38	3031.43	3345.77	3079.11	3199.61	3252.84	4031.19	2112.64	2754.03	2966.33	2930.63	2589.32	3073.94	2820.07	3042.15	2835.86	2798.61	2745.31	2567.38	2509.76	1924.91	2671.6	Transcription
398	P33442	RPS1A	287436	280731	260246	289348	284844	258423	338379	337838	335531	359158	384783	404551	227174	369599	316526	373521	377851	367266	370741	415920	387566	420529	431318	409188	398406	324308	490726	Tanslation
399	P33750	SOF1	887.262	767.454		841.965	951.398		1183.94	1255.61	1090.43	1190.79	1619.11	1726.38	958.789	1555.82	1440.71	1503.77	1501.32	1759.3	1848.17	1953.28	1937.55	2087.92	2089.54	1860.88	2055.07	1655.97	2198.86	Other
400	P35191	MDJ1	11868.4	12348	11108.4	10687.8	11474	10524.4	11568.6	11627.9	11318.8	12007.3	14249.2	14848.2	8785.81	12501.2	11520	13374.4	13966.3	13570.3	14859.3	15649.1	15252.2	14689.3	16189.4	15107	12913.8	11112.9	16031.2	Chaperon
401	P36013	MAE1	8425.72	8250.36	8331.97	12308.9	12969.9	13285.9	17133	16635.2	16728.1	17210	18908.4	19909	11275	16653.1	14966.1	17062.6	17919.4	17627	18400.2	19677.7	19396.2	20220.2	20397.6	19436.1	18083	15549.3	24422.4	Other
402	P36016	LHS1	2385.16	2296.95	2300.57	1941.55	2449.61	1781.84	2307.65	2575.19	2447.65	2557.41	2985.7	3289.27	1497.32	2041.99	2434.32	2004.93	2283.32	1903.37	2302.36	2288.92	2041.74	1959.19	2154.24	2503.02	2069.78	1684.89	2548.06	Chaperon
403	P38713	OSH3	1028.34	1619.03	1004.63	1358.82	1273.95	1715.78	1399.57	1430.66	1457.17	1367.84	1564.66	1992.91	1109.29	1225.36	1501.09	1322.31	1299.43	1363.98	1390.09	1015.91	1782.36	1528.94	1784.18	2195.38	1415.52	1069.23	4293.55	ER
404	P38715	GRE3	50026.8	49028.4	49151.8	46642.3	42957.5	45132	35525.2	34992.8	36827.3	30710.4	29899.2	32580.5	14420.2	17830.8	17970.3	13576.6	13714.2	13097.3	12779.2	15473.4	13199.2	14819.3	14329.4	14330	12763.5	10220.7	14755.2	lipid metabolism
405	P38779	CIC1	3812.88	3956.96	3855.96	4499.99	4501.72	4130.56	6226.93	7350.31	6103.71	7605.89	8764.22	8632.4	5081.04	7712.6	7320.71	8023.4	8460.9	8403.07	8075.43	8615.02	8805.54	9206.55	8433.5	8909.86	8500.39	7083.58	10498.5	Other
406	P38795	QNS1	3605.36	3360.37	3637.74	3776.68	4138.65	3390.73	4263.75	4712.42	4214.27	4277.94	4614.47	4712.48	2825.27	3814.25	3547.05	3140.35	3159.93	3306.53	3121.63	3065.43	3117.99	2879.26	3253.72	2842.71	2727.31	2335.03	3221.05	Other
407	P39958	GDI1	27355.6	27589.3	27583.1	28773.3	30699	29201.6	33433.2	34798	34213.5	31037	34920.8	36849.7	21202.9	27201.9	25336.6	25814.3	26705.2	26443.2	23995.1	22540.8	24275.5	21351.7	21016.3	20562.2	17885	14306.1	20649.3	Other
408	P39985	POL5	549.276	632.571	691.516	597.243	811.051	744.438	1083.21	1347.75	982.471	1352.65	1047.1		896.079	1407.09		695.683	1404.75	1496.19		1609.93	1210.86		1213.9	1392.52	1155.77			Transcription
409	P40024	ARB1	23897.8	24112	24159	24883.9	24462.7	25477.3	27236.2	27455.4	26461.6	27651.3	30404.5	32226.9	18857.5	27560.6	26101.9	27262.2	29424	28866.3	28142.8	27962.7	29432.4	29457.6	28554	27953.3	26450.9	22164.9	34202.6	Other
410	P40341	YTA12	1635.27	1494.57	1558.78	2097.54	2286.42	2006.48	2807.19	3256.28	2835.57	2863.73	3849.71	3415.4	1896.39	2889.88	3015.95	2755.62	3493.07	2892.2	3257.24	3912.16	3817.62	3811.7	3149.83	3150.9	3068.1	2667.89	2916.06	Mitochodria
411	P40564	DJP1	3225.65	3647.4	3357.33	3052.07	3408.3	3155.57	4940.92	4629.12	4184.38	4995.7	5659.14	5559.03	3409.24	5372.67	5275.19	5369.78	6365.22	5256.86	5550.34	5960.14	6029.72	5983.01	6211.34	5151.96	5041.32	4106.95	4968.68	ER
412	P46680	AIP1	15900.6	14717.5	16000.4	14817.3	15445.8	15220.8	17762.6	17704.6	17382.2	18029.5	19165.5	21006.5	11084.4	15251.5	14875.5	14698.3	14980.9	15204.3	13862.8	15522.6	14821.6	15120.6	15138.6	14449.4	13664.5	9885.53	14744.1	Stress
413	P49090	ASN2	14564.4	15729.9	16226.5	20908	20945.9	22019.5	34400	36075.2	34258.1	35957.3	40644.6	41823.1	23433.9	34023.8	31621.8	33207.9	35189.4	34783.5	34697.4	38854.4	36502.7	44468.2	43540.3	42662.1	39855	32555.9	48665.1	AminoAcid
414	P53140	RMD9	1856.65	1581.22	1766.76	1976.85	2018.98	1398.21	3808.04	3781	3485.64	3996.89	4102.69	4421.06	2665.89	3852.08	3947.49	4387.39	4388.33	4859.07	5225.9	5437.23	5076.91	5023.9	4688.21	5188.66	4724.39	3859.74	5069.96	Mitochodria
415	P53550	DCP2	788.679	678.402	770.075	880.492	870.793	775.529	1123.45	1201.1	1004.16	1135.45	1186.91	1382.53	879.445	1129.8	1071.55	1036.11	1162.43	1157.92	1101.45	1109.77	1236.78	1130.92	1101.3	1176.78	1088.97	849.056	1337.95	Other
416	P53981	YNL010W	20487.5	19417	19838.7	19265.5	19218.6	19551.3	24337.9	24268.2	24190.9	26727.9	28617.9	29093	17604.4	26621.7	24596.8	26650.4	29233.9	29425	28190.6	27795.5	28879	28527.6	27583.6	26057.9	25401.3	19682.4	30195.5	Other
417	P54783	ALO1	11063.6	10587	10457.1	13049.1	11112.7	12226.7	12721.9	12058.4	11967.6	11357.5	13912.1	14649.9	8536.19	11328.4	10649.5	10368.6	11107.7	11380.1	10346.2	10525.6	10218.4	10207.7	10737.6	9807.54	9363.07	7388.99	10762.1	Stress
418	Q03161	YMR099C	36315.3	35370.1	33504.6	34282.4	32233.5	31768.7	35999	37257.4	34764.8	36709.6	38348.1	41280.3	25756.5	31181.5	29317.4	30427.3	30332.7	31632.5	29210.4	27725.5	29863	25075.6	25349.4	23973	21617.1	17046.6	25402.3	Other
419	Q03862	ARX1	7874.52	7610.02	7827.81	8049.38	7921.48	7866.77	10366.7	10763.8	9898.23	11599	13152.9	13833.5	8380.9	11921.1	10952.3	12329.1	12841.6	12678.8	12848.5	12109.2	12607.9	13340.6	13254	12794.2	12458.1	9582.4	16157.7	Other
420	Q03940	RVB1	22980.9	22348.2	23428.8	22618.4	21969.3	21851	22237.6	23958.4	23219.5	24390.3	25888	26252	15187.8	22056.1	21019.3	20989.5	22644.4	21408.4	20653.5	20664.8	20745.7	20260.5	20046.5	18849.5	17525.1	14398	21806.6	Transcription
421	Q04336	YMR196W	2845.1	2429.26	2350.71	2734.55	2176.07	2694.14	2554.97	2306.46	1908.22	1992.13	1628.64	2189.56	1154.27	1061.39	821.422	1047.49	782.867	1071.98	515.031	580.541	764.801		591.374			201.91		Other
422	Q06218	DBP9	2382.26	2197.53	2534.88	2579.39	2620.21	2687.4	3787.32	3936.59	3146.52	3319.72	4353.94	4784.61	2708.44	3711.97	3568.02	3619.84	3924.64	4002.28	3965.06	4084.26	4183.49	3997.7	4047.1	4032.37	3778.02	3148.01	4571.38	Other
423	Q06706	IKI3	1678.89	1461.9	1686.18	1452.3	1300.72	1407.17	1623.07	1769.34	1637.22	1374.44	2066.44	2397.14	1151.78	1640.73		1562.75	444.185	1591.63	1543.18	1795.02	1514.03	1900.25	1863.19	1900.13	1561.72	1243.48	613.854	Transcription
424	Q12118	SGT2	84224.6	91479.8	89081	92956.1	89279.7	91585.5	92094.9	95834.7	92093.7	95970.5	100500	106219	58155.6	82823.8	76547.3	80168.2	84771.4	83213.5	81619.9	79894.6	81574.9	80771.4	78246.6	77336.8	71042.2	58267.1	86089.9	Other
425	Q12211	PUS1	4549.11	4809.8	5522.87	5838.26	6113.75	5694.46	8566.31	8804.81	7434.91	8556.75	9173.25	9646.57	5113.77	7435.35	7092.92	7163.17	7249.71	7004.38	6970.46	7334.35	7214.62	8183.75	7439.13	7713.52	7245.53	6437.18	9794.93	Other
426	Q12263	GIN4	705.08	713.529	839.902	834.298	879.869	785.296	1445.1	1409.65	1295.49	1630.49	2244.41	2015.36	1205.22	1868.67	1723.74	1705.21	1676.68	2100.18	1822.61	1703.25	1968.74	1490.7	1311.87	1553.04	1283.28	1130.16	1686.17	Other
427	Q12377	RPN6	38294.4	37549.5	36310.5	36213.5	35227.4	36219.2	37237.8	37291.1	39063.7	39127.3	39962.3	43414.1	22981.9	30158	31192.1	29493.4	28649.3	30986	29005.8	27528.7	29647.5	27398.2	25810.2	26633.8	22928.5	16493.1	29701.6	Other
428	Q12389	DBP10	1217.88	1114.21	1108.14	1362.16	1320.5	1344.34	1800.84	1833.95	1841.02	1927.76	2268.2	2293.71	1398.14	1965.19	1728.24	1944.28	1998.55	2036.17	1989.08	2167.39	2089.18	2057.46	2096.52	1957.84	1901.9	1603.19	2381.07	Other
429	P00927	ILV1	15092.3	14577	15328.7	18362.1	17796	18133.2	24923.4	24527.5	23617.4	24618.4	26083.3	28092.5	14813.6	19808.3	19754.4	18942.4	18809.5	18867	18021.4	19468.4	18897.8	21329	20870.3	20531.4	19321.5	15260.1	25502	AminoAcid
430	P05755	RPS9B	262776	266653	271366	276361	282133	273946	380827	410294	364675	410062	452961	483831	280336	417586	383239	439832	445557	449749	462258	507604	459467	551105	555146	527670	511818	424971	640161	Tanslation
431	P07275	PUT2	18412.4	17364.8	17817.2	17859.7	18572.8	18525.5	20553.9	21239.2	20166.6	21275.3	24667.1	24234.5	14842.1	21410.1	20566.2	23737.7	23136.1	23182.8	22150.2	24805.9	24240.9	23936.2	22999.4	21555.1	18950.1	15733.7	21030	Mitochodria
432	P07342	ILV2	63354.6	60400	66305.1	79251.6	81082.8	83474.2	113518	114061	112739	112730	125036	133769	69781.1	101783	96004.4	96997.7	97391.4	96454.4	96861.1	101681	98718.6	102540	104593	96427.4	89537.7	73621.5	105656	AminoAcid
433	P11325	NAM2	701.976		718.463	786.003	796.512	518.615	1093.75	988.711	856.054	1272.81	1083.16	1189.16	945.848	1267.03	1108.12	1574.33	834.87	2191.11	1310.36	1260.67	1621.71	1765.08	1324.48	1735.38	1480.88	1221.62		Mitochodria
434	P11986	INO1	34292.6	32019.4	33724.5	48092.5	47811.8	45839.9	52325.7	52037.6	47627.1	53404.2	51700.2	59174.9	37605.7	48651.9	48936.4	48733.6	48364.7	54007.8	66942.9	74127.5	68723.8	61144	57769.4	54500.3	45373	28218.6	34663	lipid metabolism
435	P14906	SEC63	2689.97	2573.56	2603.41	2936.64	2666.29	2684.53	3681.7	3667.18	3304.65	3599.76	4149.21	4124.11	2788.43	3126.18	3284.28	3748.13	3402.93	3264.06	3469.08	3276.13	3344.51	3459.4	3351.86	3025.16	2557.12	2657.19	3200.4	ER
436	P16451	PDX1	8327.48	8388.99	8287.23	8159.51	8515.35	8129.4	8302.88	8980.49	8577.43	8668.28	10437.1	10253.5	5771.48	7964.69	7770.88	7473.15	7476.62	7352.6	7253.09	7529.21	7546.12	6433.81	6580.21	6264.51	5726.96	4566.71	6250.68	Mitochodria
437	P17709	GLK1	195128	197904	195984	217627	207837	219001	187964	193725	191120	166323	174279	177019	84220	108740	102625	84509	86489.2	81502.2	67749.2	72619.9	69107.9	59855.1	63000.1	54327.7	45560.6	29696.6	37778.8	Other
438	P18544	ARG8	18436.8	18620.3	18799.9	28193.6	27224.4	29372.2	45268.5	40576.1	43454	40380.8	44115.8	47034.4	22432.4	29278.3	28624.5	22123.6	23299.2	21722.5	19031.8	15665.8	19022.4	19010.1	18291.9	19021.8	17260.7	14387.4	23508.4	AminoAcid
439	P20459	SUI2	30087.5	32392.8	30761.1	29679.4	29606.5	30055.6	34721	35830	34835.7	37589.8	40296.8	43202.8	25598.3	37019.8	34573	35950.5	37149.3	37510	36233.8	35741.1	37908.1	33532.5	34213.9	32011.3	30428	24648.3	36162.6	Tanslation
440	P22213	SLY1	2555.47	2313.31	2874.49	2445.21	2356.39	2327.79	2650.35	2717.44	2367.51	2554.05	2911.51	2954.65	1677.65	2237.94	2462.75	2277.07	2137.8	2488.11	2002.25	1810.56	2118.71	2097.82	1946.14	2072.27	1766.97	1352	2480.63	ER
441	P25623	SYP1	6586.79	7641.88	6947.53	6349.28	7321.84	7169.86	7850.89	8248.41	7156.47	7445.3	7743.5	8296.13	3983.35	6185.32	5669.75	5268.7	6018.82	5548.84	5069.11	4939.73	5436.94	5047.45	4856.94	4659	4506.28	3583	5318.66	Other
442	P32614	FRD1	13767.5	12195.3	13486.3	10824.2	10653.6	12387.8	10598	10860	10806.9	11545.1	12216.8	12301.9	7727.02	9948.18	10892.2	9660.39	9887.7	10940.8	9847.13	8765.94	11262.2	8878.74	8248.95	8460.48	7351.05	5621.25	7663.42	Other
443	P32775	GLC3	9157.95	10112.2	11142	10192.6	9090.71	10131.3	8798.01	8005.8	7926.14	6354.93	5735.47	6746.98	3016.34	3472.71	4117.26	2042.01	1912.71	2014.05	1556.37	1932.78	1622.99	1785.45	1872.2	1690.69	1515.4	1167.64	1114.74	Other
444	P33297	RPT5	34587.8	35188.5	34776.7	35380.7	35156.3	35301.9	35336.9	36791.6	36015.4	37037.8	39830.2	41026.6	22539.7	32371.6	30104.3	30465.5	32277.7	31213.6	28550.4	28690.7	29585.3	27988.6	29638.2	27388.6	25936.9	19361.6	30903.6	Other
445	P33313	CNS1	2241.72	2515.6	2579.81	2260.19	2283.18	2542.96	2980.3	2725.42	2871.1	3116.67	2945.64	3168.42	2020.96	2673.3	2861.73	2884.31	2955.96	3199.05	3153	2749.67	3048.15	2938.08	2929.66	3119.89	2776.21	2615.02	3916.58	Chaperon
446	P36006	MYO3	453.174	415.952	357.459	408.164	378.116	213.308	77.3913	476.328	295.456	270.09	285.389	183.642	165.809	252.657	89.8888		232.246	95.6705		207.229			187.746	90.3467		124.675		Stress
447	P36060	MCR1	134744	132933	134248	134283	134966	142148	122284	124312	125445	116691	123491	135220	66562.5	93284.1	89846	83138	81771.4	81697.5	79577.4	99353.2	89604.6	90297	91370.1	83313.5	70362.4	54505.8	65356.2	lipid metabolism
448	P36148	GPT2	3886.8	2708.86	3925.04	4332.37	3171.3	3889.53	3777.2	3330.38	3777.08	3242.87	2244.69	4988.41	1840.31	2529.29	3565.96	2456.96	2745.98	3384.05	2277.65	1952.86	3015.27	1805.06	1635.81	1471.14	1239	1103.05	1019.19	lipid metabolism
449	P38011	ASC1	232246	230515	235497	242149	255658	256098	324178	337808	317150	362504	422501	441909	240512	353180	342738	398489	393979	395958	394646	456335	407187	483678	478307	475170	449716	369741	555111	Tanslation
450	P38339	RGD1	457.715	499.609	473.636	426.602	354.592	327.062	424.036	539.893	392.832	438.651	724.388	417.904	247.178	445.892		312.036	436.577	394.195	389.554	399.864	360.409	339.044	315.345	366.286	343.633	297.087		Other
451	P38628	PCM1	8364.56	9242.66	8533.94	9146.09	8394.38	8031.09	10854	9633.11	9797.72	10163	11261.1	12065	6945.65	8544.98	8994.7	8995.23	8735.17	10042.3	9656.12	9283.38	9309.55	9254.6	9094.7	8699.99	8173.23	6680.43	10023.3	Other
452	P40469	MET18	212.097	222.509	236.701	168.755		118.805	243.893	166.319	342.219	197.195	221.029	296.656	133.859	167.861		153.913		223.238	152.101	183.021	251.616	184.782	318.554		141.039		201.423	Stress
453	P40991	NOP2	11945.3	12377.6	11746.1	13276.4	13799	12750.7	18290.2	18815	16437.5	18820.3	22117.2	22151.8	13452.3	19464.1	19405.9	20312.1	20780.6	20897.5	20593	20904.6	20421.4	20872.5	20097.5	19143.8	18756.8	14899.7	22371.7	Other
454	P41895	TFG1	1507.46	1635.82	1836.53	1796.5	1929.09	1680.82	2419.11	2627.22	2189.5	2684.26	2964.34	2842.18	1603.98	2452.36	2123.19	2258.3	2453.43	2416.64	2177.3	2242.81	2405.15	2518.53	2261.76	2168.68	2527.18	1821.7	2610.43	Transcription
455	P41940	PSA1	69861.2	60745.3	67533.9	61711.5	62025.1	64074.3	72082.4	72975.6	69547.8	75678	80979.7	94574.4	51862.5	71310.9	69138.3	76122.1	77890.3	79737.2	77830.6	93602.8	80816.9	107835	106144	104166	99819.6	79054	118700	Other
456	P48015	GCV1	23663.5	23258.4	24664.8	24367.9	24633.1	26297.9	33144.3	34188.9	32578.3	35930.7	38402.8	38762.7	21651.2	28138.3	28338.6	29227	29176.5	29100.1	28043.7	28246.2	28888.9	30999.2	30512.7	29215.4	28383	22442.4	33584.3	Mitochodria
457	P48164	RPS7B	38322.6	35938.7	37983.7	48064	45056.5	42180.2	51540.9	53324.6	47317.4	52061.5	64125.9	65890.1	36901.7	56132.8	49818.4	53766.1	59935.7	57117.8	54915.6	67774.3	58942.6	73525.2	76279.8	71474.4	67729.2	58789	90520.2	Tanslation
458	P48570	LYS20	49445.9	48221.7	54615.3	55281.5	57158.3	63399.4	87456.8	86949.7	85914.5	89948.6	88556.9	97220.7	52861.4	77462	75028.9	71990.9	69848.9	77548	74646.6	86680.2	81881.4	100647	100056	104878	99154.8	84616.9	141983	AminoAcid
459	P49687	NUP145	971.091	988.257	848.182	864.56	704.384	933.81	908.806	991.204	1155.86	930.812	983.844	1727.01	740.052	1061.45		822.848	1035.77	866.552	1028.12	932.387	1043.23		873.223	826.511	691.543	609.971	832.142	Other
460	P53091	MCM6	1688.48	1776.66	1741.95	1668.71	1623.15	1673.8	1873.48	2328.48	2152.43	2112.24	2879.54	2535.88	1327.63	2398.68	2174.4	2000.3	2311.68	2155.82	2162.37	2236.79	2001.07	2061.43	2130.26	2282.28	1925.68	1788.72	2424.94	Other
461	P53297	PBP1	5994.61	5818.6	5682.97	6678.53	6528.44	6176.53	8219.1	8439.5	7961.43	9552.93	9838.58	9735.28	5704.61	8924.98	7976.92	8989.86	9446.63	8679.19	9218.1	9502.74	8355.19	10386.8	10275.4	9581	9131.84	7449.97	10507.8	Mitochodria
462	P53319	GND2	46885	46816.5	38309.3	44753	39494	38384.4	25907.4	24136.2	27097.2	16714	16172.5	18185.7	4447.65	3289.26	3507.8	651.104	1403.77	1023.14	795.526	687.574	950.149		1180.82	909.551	441.684	414.646	2179.9	Energy
463	Q00711	SDH1	68925.7	62936.9	68761.3	81230.4	88862.9	87127	118144	118045	114303	130561	142296	154163	95877.5	146882	138743	155053	160239	155680	162496	194717	168765	163265	169357	153370	129157	96201.7	119365	Mitochodria
464	Q01532-2:Q01532	LAP3	29774.9	31755.6	32657	33745.9	33604.3	32183.7	43507.4	43001.4	42480.8	42980.8	44577	49647.4	28081.3	39795.4	39194.9	37463.9	34952.5	37836.6	32945.1	25628.9	33375.6	22601.5	22459	20720.8	18312.9	13568.1	19420.4	Mitochodria
465	Q02046	MTD1	18308.8	18221.6	19064.6	20447.2	21396	22394.3	26240.2	26399.9	25871.4	28413.3	30350.3	32034.5	17707	24953	22948.5	23743.5	24287.8	24795.1	22685.1	24495.7	23878.1	27322.1	26671.7	27554.9	25640.2	21020.4	33889.4	Other
466	Q04947	RTN1	55933.4	50426.9	53233.8	58713.1	53366.8	53802.8	55113.8	54667.7	50977.5	44537.3	56207.9	55042.9	27643	34522.1	35984	30292.9	32546	33889	32035.7	33601.8	31746.6	29382.7	30421.5	25841.8	22792	22430.2	27922.6	ER
467	Q05543	RTT103	3842.33	3434.7	4077.98	3590.44	3482.79	3492.08	3293.32	3293.78	3636	3548.29	3586.86	2954.83	1974.92	2846.61	2414.08	2551.78	2693.62	2580.97	2617.36	2378.8	2446.77	2216.9	2331.26	2063.42	1898.68	1502.15	1884.35	Other
468	Q06336	GGA1	3871.87	3409.55	3681.86	3054.75	3186.68	3909.69	3900.73	3657.17	1960.64	3571.59	2847.9	1928.78	1287.68	2193.21		1830.79		1858.88	1775.7	1754.4	1765.93	1934.92	2446.05	1838.96	1240.27	1455.53	2099.18	Other
469	Q06523	YPR148C	7573.69	7271.65	7034.16	8570.11	8359.78	7805.1	10972.6	10768	9917.23	10456.4	10745.7	11382.7	5841.2	7815.15	6936.72	7109.67	7320.07	7163.1	7267.35	6121.31	7037.67	5951.3	5433.75	5285.69	4903.79	3860.93	5688.5	Other
470	Q06704	IMH1	6312.25	4192.8	3587.34	2976.47	8325.91		5496.83	6066.17	5536.74	4620.49	6797.54	5999.38	3355.34	4273.07	4991.68	5284.01	6147.36	5272.52	6322.19	5112.34	5811.42	5865.32	5319.24	5272.39	4801.48	3875.08	5000.97	Other
471	Q08220	GSH2	6663.84	6652.35	6720.6	6981.37	7015.95	6980.75	8530.75	8135.19	7944.52	8340.91	9463.16	9872.64	5497.56	7374.2	7112.48	7442.76	7605.89	7107.73	6912.25	7669.51	7470.2	7018.73	7557.69	7157.13	6815.36	5175.44	7802.28	Other
472	Q08225	YOL057W	4368.77	3962.82	3644.67	3956.29	3960.61	4021.81	4449.73	4603.52	4280.56	4298.27	4730.17	4266.77	2634.41	3595.51	3165.88	2946.65	3489.44	3366.96	3151.86	3373.01	2848.42	2899.39	3061.19	3050.11	2523.02	2077.39	2838.25	Other
473	O13516	RPS9A	9784.71	9908.34	10301.9	9745.98	9893.55	9288.54	9817.95	8941.33	9933.56	11096.9	11278.7	11826.3	7200.47	10334.8	9248.1	10609.3	10654.8	10591.1	10607.6	11860.1	10531.1	11883.3	12328.7	11535.2	9875.89	8214.27	10947.1	Tanslation
474	P04840	POR1	204464	202889	207194	225620	231893	228560	286136	293945	279619	283905	322635	327058	186040	274317	254137	281551	280326	280001	281549	336564	273097	327738	323629	298190	261359	204140	281193	Mitochodria
475	P05374	CHO2	1056.46	1246.68	1084.44	1221.07	1269.57	1247.27	1937.79	2131.23	1891.8	1930.4	2992.39	2964.81	1552.78	2561.63	2643.91	2927.4	3483.08	3456.58	3697.6	3878.5	3965.42	3864.24	3957.86	3638.94	3225.83	3086.19	3702.91	lipid metabolism
476	P05739	RPL6B	228963	219931	233243	223977	241471	218834	307331	309998	303577	339556	381993	413380	225326	359349	324720	366597	388970	392802	384132	427924	397423	443727	445576	432894	410936	339107	512203	Tanslation
477	P06634	DED1	20785.3	20346.5	21409.2	25035.2	26453.3	25990.5	43338.2	42198.1	39983.1	49553.7	56185	56494.8	36644.5	52402.7	52912.1	55881.3	59822.1	60485.6	60159.8	67952.4	61816.7	76666.9	73553	74390.5	70624.3	58860.6	86472.4	Other
478	P07256	COR1	96232.2	98360.4	92644	105338	109470	109876	138683	145315	126624	147994	160478	163474	96207.2	161177	149386	156114	169058	155751	171091	199024	171597	191553	190764	173621	153603	119431	154063	Mitochodria
479	P08417	FUM1	58039.5	56752.3	54459.4	66448.4	67569	65351.4	99909.5	94648.4	91284.3	107914	116547	127702	78005.8	114490	113369	132208	130943	139392	151993	168759	151462	155528	153173	144671	121789	87607.7	112524	Mitochodria
480	P0CX44:P0CX43	RPL1B	139225	132395	129278	147012	131872	123525	189857	165715	150726	201711	186668	218554	149126	148996	179380	184258	161598	221249	237203	191173	207579	221636	188987	223001	178194	135341	304108	Tanslation
481	P0CX46:P0CX45	RPL2B	258187	256884	267340	269239	270390	281938	354450	364491	355081	404520	436667	462449	276510	420364	394150	434063	460250	448236	458132	494105	465956	542657	528488	512627	487011	399562	607041	Tanslation
482	P10664	RPL4A	285389	265248	292792	320088	310526	303711	409696	421761	374213	430231	459106	514604	309838	447206	404125	461628	481390	498487	485123	523939	494588	564944	552251	535177	505746	423608	624462	Tanslation
483	P10963	PCK1	2772.22	3794.08	2651.24	4210.97	3618.55	4138.11	4499.71	4928.42	5151.45	5670.4	7614.38	7375.07	5263.22	7360.28	7072.78	10434.4	10550.5	11370.7	13218.5	14432.6	13792.9	5017.12	4485.32	3717.38	2329.53	1518.01	2911.94	Energy
484	P12683	HMG1	7677.35	7773.58	7692.03	10726.2	10421.7	9379.39	12086.9	10984.9	10686.8	8989.8	12001.1	12872.1	5705.43	6647.65	7290.93	5197.11	5769.65	5679.89	4561.07	5110.28	4888.81	3723.79	4095.85	3575.63	3312.16	3216.91	3729.21	lipid metabolism
485	P15646	NOP1	50875.7	48883.7	49294.9	51966.5	52333.5	55901.8	64087	65264.9	62776.6	70340.5	78737.2	80154.4	49725	74248.1	68850.6	74331.3	79944.8	80221.9	77910.5	87695	81584.3	90547.8	91448.9	88291.1	82533.8	68411.1	102224	Other
486	P16649	TUP1	7516.3	7386.35	7996.52	8032.76	7919.06	8324.67	9526.01	10473.6	10075.5	10914.4	12638.2	13570.1	6707.93	9809.73	10851.2	9337.4	9833.46	10256.8	9831.7	10581.2	9610.21	10865.9	10630.8	10022.5	8387.35	7399.01	10836.8	Transcription
487	P17649	UGA1	20557	21138.9	21577	19275.6	19800.4	18826.1	17708.4	17958.2	16692.2	14856	15726	16237.5	7521.77	8541.88	8328.67	6644.32	6943.82	6736.9	6604.7	5312.41	6340.58	4617.29	4250.16	4121.04	3429.39	3312.49	3374.45	Other
488	P18239	PET9	189835	186478	179209	257612	241279	242137	389144	379589	335283	391164	431754	460904	284737	325704	370526	348656	348838	435550	447354	391232	412694	405622	375488	359196	313026	252576	391019	Mitochodria
489	P20448	HCA4	1044.97	980.223	801.682	2626.65	1105.12	2019.22	1678.67	1595.71	1529.43	1875.29	2890.76	2293.28	1404.15	1905.06	1869.53	2029.01	1853.27	2571.82	2064.5	2039.11	2298.93	2037.3	2072.21	2030.24	1926.94	1742.62	2463.41	Other
490	P20485	CKI1	2485.74	2541.76	2626.58	2287.36	2485.3	2142.53	3066.11	2926.4	2922.16	2961.91	3643.27	3590.22	2117	3325.54	2941.99	2902.2	3400.3	3293.87	3658.68	3749.56	3362.07	4000.57	3949.4	3587.96	3672.95	2790.73	5086.93	lipid metabolism
491	P21560	CBP3	7006.98	6840.67	6951.84	7385.78	7949.09	6935.47	10409.1	10657.2	9483.24	10332.3	13638.3	11920.5	6618.2	10874.2	9861	11316.7	12834.5	11685.3	13900.1	16921.3	14651.3	15397.4	15491.4	14315.8	14677.7	11599.8	15238.8	Mitochodria
492	P24280	SEC14	22126.9	21596.9	22684.6	23845	23763.8	25220.1	33904.2	33651.5	32554.4	35443	37529.9	39061.9	22650.7	30796.5	28827.9	29818.6	31648.3	31221	28680.5	28595.6	28645.1	30978.4	30446.6	29287.5	28495.9	23135	36248.6	Other
493	P28777	ARO2	16231.3	16607.9	16170	20404.6	20846.7	21879.8	32795	34163.9	33033.7	34946.8	38806.4	40250.3	21936.8	31218.8	30763.8	29981.8	32622.1	30315.5	31620.4	34160.4	32195.7	38796.7	38042.4	36983.7	34741.2	29788	45179	AminoAcid
494	P31412	VMA5	15436.8	16148.8	15045.3	16426.1	15078	14236.1	18835.2	18803.6	16715.2	18944.4	20165.9	21623.5	12529.2	16949.2	16900.9	17225	16575.5	17900.4	16847.6	17342.1	17330.4	19188.7	18535.5	19119.4	19198.5	15166.3	24571.7	Energy
495	P32356	NTH1	5044.13	4718.53	4168.54	5149.22	4954.26	5413.08	4666.08	5367.67	4857.82	3525.8	3625.08	2347.87	1654.52	2023.77	1777.6	1530.27	933.021	1510.44	1475.74	1360.35	1501.89	1535.96	1641.47	1564.47	1327.47		1207.55	Stress
496	P32449	ARO4	50018.7	52958.7	52388.7	62044.5	63755.8	65985	81932.9	84980.2	80244.5	82857.1	88474.1	93453.3	46312.4	66228	63364.9	56953.6	60729.2	58320.2	61238.9	62250.8	62590.3	64794.8	65307.9	63999.7	59583.6	48246.4	71417.1	AminoAcid
497	P32471	EFB1	116762	119428	112443	118544	119593	117325	148131	150160	147436	159078	176894	184117	110912	163113	152924	173505	170653	178570	174331	193381	189451	204065	201485	197245	181991	147848	219596	Tanslation
498	P32843	YME2	3544.11	3350.07	3772.4	3653.2	3524.53	3378.5	3545.8	3755.56	3391.11	3152.6	3664.65	4041.97	2134.37	2786.66	2948.73	2249.15	2693.95	2934.81	2705.24	2783.62	2750.11	2359.6	2506.34	2273.98	1964.07	1589.21	1838.75	Mitochodria
499	P32908	SMC1	1062.07	1191.47	788.023	1093.52			1161.7	1099.22	984.473	1161.58		967.649	777.388	1154.45	879.2	1079.38		1054.86	1037.67	950.249	1019.07		915.471	781.083	647.399	482.825	791.573	Other
500	P33315	TKL2	19889.2	22567.1	19973.7	21170.1	15811.3	15719.9	12629.3	8703.39	7729.55	6583.15	4075.15	7230.31	1792.49	1378.51	1899.26									303.753			327.86	AminoAcid
501	P33401	PGM1	1977.83	2197.81	2064.68	2188.93	2174.45	1861.65	3122.54	3558.59	2750.67	3433.58	3490.11	4156.31	2365.87	3315.25	3263.85	3409.61	3540.79	3714.1	3710.18	3849.27	3530.84	3939.31	3861.66	3423.98	3313.36	2835.52	4462.1	Energy
502	P35817	BDF1	1835.49	1932.94	1940.02	1599.91	1833.86	2046.53	2945.62	2631.29	3023.19	2838.15	2761.07	2725.02	1552.28	2325.25	2003.17	2352.6	1839.52	2146.94	2011.98	2253.18	1950.6	3578.69	2183.77	2038.71	2160.73	1607.2	2004.92	Transcription
503	P36041	EAP1	1852.59	1840.69	1892.75	2055.78	2039.74	1772.94	2588.61	2736.8	2295.41	2688.72	2806.56	2972.46	1679.46	2606.37	2320.34	2984.44	2459.71	2973.54	2575.62	2704.76	2797.24	2573.21	2368.69	2424.03	2303.93	1819.99	2236.69	Translation
504	P36516	MRPL3	4841.89	4355.51	4749.11	5191.19	5198.95	4679.61	9171.2	9329.26	8326.89	9308.44	10725.6	10681.6	6717.79	9805.16	9052.11	10686.3	10400.5	11139.5	11091.4	12369.9	11521.4	14330.9	13239.8	13334.1	12313.2	10016.1	14987	Mitochodria
505	P36528	MRPL17	3276.87	3580.59	3543.01	3484.3	3777.65	3747.61	6584.35	6404.33	5647.13	6823.41	7913.49	7935.36	4820.87	7425.18	7071.06	7968.25	8213.34	7973.96	8790.23	9157.46	8683.48	9340.73	8517.27	8364.16	7781.4	6289.65	9119.42	Mitochodria
506	P37838	NOP4	2754.67	636.456		1912.43	1081.28			1813.35		1826.2	2062.53	2097.06	2457.32	1976.61	3676.23	2461.93	2498.73	2552.13	3438.06	2622.63	2318.48	3330.95	2833.22	2711.2	2860.66	2335.52	3571.34	Other
507	P38426	TPS3	2713.16	2481.92	2524.22	2826.16	2937.82	3179.39	3062.07	4100.72	3240.54	3697.51	3978.84	4285.72	2203.89	3229.16	3481.9	2574.71	3262.53	3138.34	2852.1	3230.9	2902.79	3681.36	3764.68	4267.84	3114.93	2517.43	3874.26	Other
508	P38630	RFC1	1414.32	1379.91	1286.61	1342.33	1438.8	1288.57	1385.14	1377.77	1286.22	1526.51	1176.69	1530.98	898.982	1230.68	1008.11		1278.46	1286.78	1171.8		1037.94	1081.69	986.823	952.455	1124.1	716.402		Stress
509	P38755	OSH7	13040.3	12280.3	13332.9	11355.9	11781.7	12230.3	13972.8	13434.5	13373.4	13114.8	13672.3	15416.5	9340.96	12040.8	13333.2	12473.5	12694.8	12673.3	12308	12920.4	12865.7	13260.4	12088.9	12174.9	10625.7	8090.94	11790.4	ER
510	P38793	TRM5		1594.86	1777.78		2429.19	1648.66	3231.44	2166.94	1837.52	2682.12	2921.4	2852.64	1519.07	2454.21	2027.7	1927.26	2457.06		2085.45	2142.74	2608.03	2538.13	2416.47	2477.99		1701.52	2702.06	Other
511	P38821	APE4	15051.8	14896.2	14871	12475.9	11247.3	12377.1	11467.8	11808.3	11740.4	10971.8	11534.5	12550.6	7021.82	9930.02	9462.88	9280.23	8740.55	8563.94	8353.84	8207.37	8777.1	7451.41	7465.92	7221.51	6482.16	4860.41	7013.88	Other
512	P39708	GDH3	4423.01	3995.43	4858.53	3001.84	2954.01	3711	2310.92	2278.47	2037.9	2006.16		2365.31	1502	1993.97	2040.61	3123.64	2326.65	2262.25	2085.8	1604.65	1842.05							AminoAcid
513	P40055	UTP7	1369.85	1305.79	1334.64	1546.64	1751.87	1384.89	1956.55	2200.34	1864.06	2385.66	3029.22	2699.45	1624.91	2420.69	2285.31	2682.86	2576.89	2581.74	2568.78	1533.14	2783.54	2473.17	3275.3	2729.39	2369.38	2079.94	2899.41	Other
514	P47077	NOP9	1063.66	952.516	852.946	1199.23	1191.53	1203.23	1891.33	1042.43	1320.15	1477.35	1871.62	1649.37	639.536	1244.14	1496.95	1113.15	1453.03	1347.35	1166.37	1353.22	1340.59	1310.44	1155.12	1157.61	939.408	895.237	1433.01	Other
515	P49626	RPL4B	25866.4	25090.7	26154.4	25643.6	24974.8	25505	28334.4	29022.8	26247.4	28875.3	32615.9	32029	20741.2	28702.7	26042.9	32633	32909.5	31230.8	32672.1	34727.7	32388.4	36848.9	37315	35691.9	33083.2	27923.5	42891.3	Tanslation
516	P53090	ARO8	33463.9	31437.9	33090.1	50584.5	52608.5	51657.8	85529.9	85743.9	80467.7	87918.1	96212.2	100864	52527.1	75367	73245.5	64676.1	67555.6	66005.5	66391.6	68916.7	65844.1	73936.8	71961.7	71011.4	65989	54703.9	83610.2	AminoAcid
517	P53316	YGR250C	1397.5	1456.34	1613.46	1476.04	1382.24	1245.57	2053.67	2317.6	1801.5	1718.13	2156.65	1873.21	1217	1825.61	985.744	1646.39	1049.92	1214.66	1325.66	1608.62	1395.57	961.595	1377.27	1146.47	1077.18	806.579	722.132	Stress
518	P54885	PRO2	19698.3	19381.4	19704	20974.7	21331.3	21601.2	29634.7	30145.2	28605.1	31543.4	33727.7	35248.5	19214.7	28217.3	26890.3	26181.8	27606.3	27729.4	26611.9	28797.4	27949.6	29528.9	29195.1	28680.4	28210.7	22536.3	34567.3	AminoAcid
519	Q02354	UTP6	863.95	790.271	767.237	873.789	921.411	822.684	1256.16	1295.78	1130.41	1396.44	1307.85	1658.95	984.195	1427.79		1140.3	1501.39	1499.01	1440.45	1563.07	1498.78	1831.74	1550.06	1500.97	1641	1015.4	1849.06	Other
520	Q02486	ABF2	182540	184518	188959	177567	165277	170169	141766	157350	154625	141600	148549	153644	78352.3	111972	101215	93526.3	97137.1	96824.6	85325	90714.4	92947	80328.2	82332.4	76756.9	67186.8	53148.4	73486.9	Mitochodria
521	Q03532	HAS1	4771.91	4645.08	4981.11	5657.08	5930.02	5822.15	9473.44	9285.15	8327.36	9796.01	11866.7	12956.6	7648.23	11154.1	11173.2	12140.5	12572.6	12866.8	13515.3	14328.1	13044.6	14901.4	14544.6	15038.3	14632.9	12130.2	19319.8	Other
522	Q04458	HFD1	15877.1	15646.6	14656.8	14653.9	13426.6	13607.8	12693.5	11585.3	11482.7	10590.9	10469.2	11208.6	5793.57	6597.39	6465.85	4559.19	5244.61	5165.93	4594.17	3968.63	4127.74	3118.8	3257.85	2973.92	2669.02	2018.21	2500.55	ER
523	Q05946	UTP13	1190.38	1152.38	1255.94	1291.23	1403.93	1219.09	1684.95	1772.32	1722.47	1880.83	2145.14	2353.5	1330.62	1931.22	1903.65	2037.54	2122.53	2027.14	2133.25	2325.45	2223.14	2430.67	2344.3	2297.63	2138.96	1886.49	2695.72	Other
524	Q06344	ESF1	1060.26	1089.17	1189.56	1051.74	1226.83	1326.15	1452.14	1498.49	1750.35	1566.75	1466.2	1819.62	900.466	1305.46	870.124	1349.94	1235.25	1502.21	1284.13	1803.96	1318.27	2611.96	2779.46	2859.12	2927.6	2185.77	4204.43	Other
525	Q06678	MRPL35	3804.42	3930.66	3890.73	4036.67	4341.88	3951.95	6833.49	7022	6243.68	7927.92	7821.37	8528.41	5529.58	7372.72	7555.48	8618.25	8822.72	9031.33	10068.3	10511.4	9928.08	10224.1	9298.35	9441.9	8776.06	6774.93	10809.4	Mitochodria
526	Q08645	MET7	3353.97	3132.01	3577.83	3465.13	3347.87	3296.12	4426.83	4480.43	4082.7	4101.86	4307.15	5051.19	2566.31	3591.07	4521.72	3539.7	3876.05	4033.78	3707.58	3908.23	3910.15	3811.93	3863.98	3821.07	3928.13	3022.78	4926.44	AminoAcid
527	Q10740	LAP2	5511.92	5298.84	5426.65	4980.39	4883.64	5188.67	4986.36	4839.56	4435.08	4331.2	4511.19	5302.3	2671.16	3710.32	3519.84	3329.54	3337.27	3424.84	2892.05	3272.7	3287.42	3146.66	3261.17	3271.13	2711.8	2388.45	3118.52	lipid metabolism
528	Q12122	LYS21	18192.4	17642.5	17462.4	19865.9	20214.4	19291.7	24476.1	25761.6	23573.6	25766.3	26394.7	28099.5	15021.5	20956.4	20624.4	17847.8	18651.1	18789.1	18309	22029.7	18518.9	24929.6	23614.9	24626	23582.8	19003.8	32177.3	AminoAcid
529	Q12363	WTM1	188233	180701	189226	181026	170941	172039	153247	149628	155652	142392	139041	150430	66493.3	79973.7	78520.1	56163.3	60520.5	54585.7	44688	44023.3	43622.4	46027.1	45772.6	44025.8	40176.1	31358.3	43764.3	Transcription
530	Q12532	TAE2	1430.14	1110.85	1437.13	1311.27	1339.61	1361.88	1397.9	1660.89	1591.6	1495.51	2008.69	1824.33	962.699	1415.62	1166.76	1007.44	1441.96	1352.57	1339.97	1524.8	1394.26	1373.3	1329.75	1411.88	1419.49	1218.28	1765.95	Other
531	O13297	CET1	1004.28	1416.75	1069.14	1304.02	1081.61	990.297	1235.55	1355	1229.17	1309.08	1455.75	1406.45	703.238	1175.95	960.404	1118.29	1069.47	1179.1	986.405	1055.62	1001.56	889.283	1124.89	1073.2	858.702	765.221	1016.74	Other
532	P00899	TRP2	15678.3	15274.6	15157.6	19032.4	19825.6	20238.9	32526.8	33872.6	32652.3	32304.3	34729.3	36468.6	19214.9	26725.9	26026	23417	24387.6	23614.8	22563.3	23289	23414.9	25670.4	25470.5	24976.1	23695.4	18252.4	30599.4	AminoAcid
533	P04786	TOP1	750.817	1209.39		1065.22			1818.1	1784.34		2111.78	2258.49	2026.56	1304.48	1903.34	2097.71	1917	2175.79	2001.21	1704.71	1808.89	2205.66	2111.86		2799.13	2077.18	1629.45	2113.38	Transcription
534	P05737	RPL7A	213492	211220	215217	238282	226229	227168	329169	307209	295245	343205	384996	429161	237186	347148	327393	370864	367756	385206	401058	417600	395809	455231	425573	434326	406005	318104	516721	Tanslation
535	P05748	RPL15A	221227	207919	213630	210687	222369	243257	311872	319548	311175	333336	366962	423791	228731	352191	329454	366661	379369	385297	377770	407284	392711	444678	431920	424896	404373	330464	495997	Tanslation
536	P06102	NOT3	1834.98	1888.41	1520.21	1757.74	1911.69	1783.24	2382.07	2421.77	1968.99	2289.77	2152.82	2873.42	1520.91	2152.41	784.068	2174.79	2137.48	2399.71	2096.53	2419.51	2411.5	2245.08	2206.94	2223.24	2147	1291.41	2317.68	Transcription
537	P07991	CAR2	47583.8	46157.2	45718	40758.8	40066.7	41336.2	34601.5	34282.7	34374.6	27319	27758.4	28936.6	14693.6	18845.3	17401.4	15256.1	15161.9	14601.2	8566.1	4512.08	8654.29	3661.35	3716.07	3510.7	2748.93	2046.76	4590.91	Other
538	P12695	LAT1	51552.3	49915.3	52921.2	52939.5	53504.2	54791.6	59016.4	61793	59638.4	61080.3	64066.7	66825.7	38282.4	53478.4	50391.5	50862.7	53664.7	53430	49679.1	51643.6	50396	48797.5	48246.6	45431.6	41238.6	31010.1	46174.9	Mitochodria
539	P20449	DBP5	12911.8	13109.5	13795.3	12344.2	12042.6	12363.3	13028.9	12588	13031.6	13318.4	14980.6	15931.6	8799.69	11845.5	11398.2	12732.2	12522.9	12802.2	13113.4	13310.7	12417	15413.4	13424.6	13740.2	12854.9	10800.6	15559.2	Other
540	P20676	NUP1	734.131	1050.81	845.469	748.292	732.635		673.655	944.328	798.073	855.05	1241.96	1677.13	537.549	981.791	1172.74	1448.08	818.863	998.225	801.366	858.853	739.662	1367.22	1030.14	621.543	754	816.401	728.774	Other
541	P27616	ADE1	44114.3	44406.4	45807.5	49660.7	53713.7	53439.8	65596.6	66289.3	62879.5	73775.8	80013.7	83138.8	50212.2	73841.5	70056.9	76435.7	78203	78236	79053.2	77295.8	77927.1	66660.7	67070.9	63512	59387.2	48179.2	73091.8	Nucleotides
542	P29952	PMI40	32352.4	33310.8	32319.9	35478.1	34883.9	35884.5	42457.4	42470.2	41068.6	43131.4	46447.6	50016.9	28019.6	40434	37316.4	38676.3	39711.2	38951.6	37458.9	40047.7	38271.7	42390.2	42740.4	41719.6	38422.4	31710	46179.9	Other
543	P30665	MCM4	893.736	1134.37	1276.05	1170.97	1057.49	1110.69	997.708	1330.58	1192.81	1324.14	1364.33	1570.07	969.673	1351.9	1447.59	1353.75	1557	1437.13	1170.85	1452.35	1174.3	1517.84	1398.42	1476.28	1369.33	826.497	1402.15	Other
544	P32386	YBT1	672.135	671.052	686.294	752.885	759.256	691.055	896.623	993.361	857.639	789.931	956.067	1028.02	512.536	640.697	533.47	650.347	769.924	704.187	694.895	722.275	636.726	785.85	717.337	710.403	611.192	604.695	798.954	ER
545	P32769	HBS1	2434.06	2018.53	2245.52	2664.05	2669.42	2319.19	3499.39	3660.93	3454.73	3700.6	4188	3806.85	2474.98	3618.87	3440.04	2911.23	3386.95	3268.13	3618.17	3738.68	3284.89	3629.02	3888.2	3621.62	3837.62	2663.21	3612.34	Other
546	P32892	DRS1	1314.3	1436.03	1352.62	1462.75	1485.47	1333.22	2156.57	2187.74	2028.07	2235.07	2667.78	2594.75	1618.99	2464.38	2357.05	2871.73	2732.92	2624.35	2661.46	2824.95	2840.85	3123.24	3117.64	3065.33	2947.49	2478.29	3808.72	Other
547	P34077	NIC96	1628.33	1719.46	1325.33	1621.17	1370.11	1442.99	1732.41	1722.17	1510.58	1751.27	1609	2026.52	1149.92	1269.17	1543.91	1369.44	1434.49	1274.95	1247.96	1203.3	1306.56	1426.8	1533.04	1243.44	1088.01	1200.86	1548.4	Other
548	P34160	STO1	1719.08	1957.03	1916.35	2102.54	1753.64	1947.36	1915.29	2094.06	2191.87	1754.79	2479.25	2571.8	1312.03	1785.66	1810.63	1877.57	1609.76	2150.94	1697.27	1785.45	1818.99	1746.03	1794.65	1764.73	1297.61	1412.53	1802.48	Other
549	P35197	GCS1	3853.19	3660.51	4079.14	3875.07	4019.87	3721.86	4562.64	4861.41	4587.97	5168.3	5694.82	6210.71	3362.03	5387.91	4723.94	5214.2	5410.08	5391.08	4984.54	4936.97	4968.81	5522.46	5206.81	5726.31	4998.82	4251.84	5835.26	Other
550	P35207	SKI2	848.437	991.275	1105.03	928.032	1009.81	664.952	979.39	1182.36	836.125	979.076	1119.36	1440.89	669.274	1016.44		748.635	1169.59	881.578	1042.02	1272.11	930.79	1009.44	956.923	881.703	687.128	790.137		Other
551	P35719	MRP8	24228.8	24477.2	23842.5	24548.7	24445.8	25904.9	25580.9	25397.8	25616.7	22726.4	24410.9	25779.9	11838.7	16150.4	15374.4	13509.1	13005.8	13194.7	11985.6	10964.8	11526.5	9675.42	10444.4	9601.99	8529.93	6545.13	8990.9	Other
552	P36139	PET10	50951.9	58389	50789.7	43588.8	36535.5	37558.8	30268.4	29146.3	25670.2	27856.2	24320.4	22410.8	11863.8	11963.5	9100.49	7256.7	9592.83	8855.26	10828.5	8360.76	10093.5	7474.42	10107.8	8330.67	9496.7	7702.47	11419.7	Other
553	P38181	NUP170	590.899	512.872	586.822	683.03	773.983	594.745	851.581	1046.74	705.929	738.605	861.826	954.859	466.077			607.797	683.402	718.488	578.779	608.593	682.998		520.054		692.506	551.434		Other
554	P38688	SRP72	1558.06	1435.76	1605.47	1563.69	1686.48	1525.54	1988.74	1733.01	1776.29	1812.92	2171.53	2432.88	1218.19	1625.76	1718.8	1533.3	1781.45	1724.04	1430.88	1633.88	1733.06	1536.38	1590.03	1384.61	1220.08	1224.64	1619.55	Other
555	P38845	CRP1	25156.8	28397.1	26590.7	22000.8	18267.4	21549.4	17417.7	16041.3	17873.2	15989.4	17119.5	19956	9143.81	11877.5	10906.4	10784	11573	10714.6	9235.18	10058.5	9676.99	9612.09	9526.69	8931.26	8189.53	5825.65	10159.5	Other
556	P38929	PMC1	1029.04	1111.16	992.224	1303.32	1111.53	1151.94	1226.78	1266.14	1455.73	1082.02	1490.18	1773.55	718.809	899.86	955.387	708.228	707.365		521.57	682.328	544.37	566.215	610.962	486.851	526.591	438.844	470.08	Other
557	P39685	POM152	973.772	971.037	1032.89	1128.14	1036.31	993.567	1251.93	1163.3	1039.05	951.975	1186.57	1342.72	792.611	921.068	1000.19	1101.01	990.825	950.962	980.588	947.068	867.613	1048.54	1021.06	932.769	838.111	695.588	958.35	Mitochodria
558	P39705	NUP60	1029.35	1157.95	1063.43	987.222	1013.63	1127.27	1344.35	1340.14	1004.21	1492.97	1412.4	1433.72	801.565	1177.02	997.013	1022.81	1060.06	1071.35	1007.92	1132.53	1111.42	1077.51	1223.51	1220.62	1268.43	891.406	1381.71	Other
559	P39954	SAH1	139941	135688	140087	176000	166617	161359	308396	320602	310311	339185	395475	434118	260408	374162	373878	449255	460707	458930	469722	476690	503243	442716	454130	444188	391493	322164	465915	Other
560	P40017	YAT2	5743.74	5552.35	5965	6001.41	5896.5	6622.8	8197.06	7394.4	6633.67	7267.39	7652.78	8850.32	4735.51	7059.26	6124.77	6078.27	6267.78	6153.12	5949.54	4325.47	5950.26	2391.86	2829.73	2406.76	1872.12	1334.43	1726.14	Other
561	P40495	LYS12	43864.4	40610	42786.4	39754	42784.2	42247.9	53840.5	54806.3	54144.2	58134.8	61987.6	68005.8	38879.7	58251.7	56502.1	60209	60943.6	62312.3	60475	67498.6	64209	74092.8	70990.4	68816.6	64957.1	52022.7	77409.3	AminoAcid
562	P40531	GVP36	78187.9	78403.8	79810.3	64674.9	66324.9	66384.4	69236.1	67786.2	67135	70226.2	74588.9	76321.1	43029.3	59899.7	55974.5	56250.5	59926.5	57813.6	55027	56127.5	56874.2	53291.8	54458.1	51797.1	47596.4	38240.9	52382.6	Other
563	P40989	GSC2	378.358	349.056		343.924	360.774	471.41	516.942		569.702	348.098			271.764	290.754					218.197		236.042		146.904					Other
564	P41338	ERG10	38983.1	38796.7	40564.9	42985.8	43085.9	43743.6	58859.3	58707.3	57222.7	58785.3	59542.3	63205.8	32231.2	43949.9	43604.5	37672	37939	38226	34337.6	37928.1	35494.8	36464.5	35335.1	33968.2	30170.5	24596.1	36702.5	lipid metabolism
565	P42842	EMW1	1097.14	1081.33	1010.87	1176.07	1284.39	1182.42	1575.29	1793.69	1785.35	1571.81	2057.66	2054.79	1157.66	1522.84	1655.88	1588.53	1702.22	1644.07	1537.51	1817.45	1553.32	1517.27	1473.39	1439.3	1578.53	1218.98	1581.32	Other
566	P42935	ELP2	1272.39	1279.87	1496.67	1528.88	1171.64	1351.33	1791.61	1563.58	1615.63	1652.47	1645.89	2055.13	1150.09	1706.05	1698.6	1784.82	1694.01	1868.29	1867.39	2062.56	1828.03	2293.35	2114.17	3095.84	2385.59	1578.41	2743.25	Transcription
567	P43583	BLM10	128.993	95.5642		100.457		124.077					53.9877		93.0347	111.961		98.9947				197.168	126.865			104.85				Other
568	P43597	YFR016C	287.955	274.016	268.47	493.593	306.012	321.94	366.159	325.42	317.501	380.756		451.365	285.841	433.075			418.596	372.522	553.162	355.613	461.383	456.071	398.891	435.027	352.788	253.158		Other
569	P47075	VTC4	1749.72	2620.51	2606.81	2171.18	2440.3	2277.63	3376.29	3654.73	3200.22	2996.4	3408.91	3778.24	2609.83	2741.2	3733.16	2936.12	2977.18	2942.54	3402.12	3806.74	3406.8	4043.79	4012.17	3654.31	3174.8	3116.78	3973.12	ER
570	P50095	IMD3	49695.1	46308.2	49261.7	41521.9	42695.2	44930.3	54588.2	54377.4	52205.8	58462	63212.6	67501.7	43583.6	70187.7	66111.2	77125	82096.9	80606.3	78688.6	85490.4	84164.4	85393.7	87110.3	85603.9	77766.6	61600	91190.5	Nucleotides
571	P53075	SHE10	8177.32	8581.01	8236.33	8977.87	8002.77	8681.49	10046.5	9919.89	10043	9141.82	10369.9	10255.5	5361.86	7828.07	7862.05	6287.69	7076.95	6997.24	7013.74	6424.44	6299.74	5646.16	5993.11	5701.71	5874.23	4460.47	6473.86	ER
572	P53598	LSC1	51669.1	49229.1	53829.6	57431	59408.5	61063.9	81535	84551.9	80305.7	88793.5	97447.7	99485.8	58608.1	86084.1	81931.8	85615.7	85408.6	83928.5	69713.4	64627.5	74236.4	50797.9	53053.5	47097.3	41127.1	31260.5	40126.7	Mitochodria
573	P53691	CPR6	60146.6	62427.7	63838.2	52164	47718.3	49590.1	37548	39690.2	41454.2	36373.9	37327.3	39109.5	19406	28552	25668.7	25850.2	28024.3	27481.5	25236.4	23577	26535	23842.8	23530.7	22727.2	20818.5	17446.9	26788	Chaperon
574	P53741	BRE5	2673.15	2872.64	2577.02	2575.88	2968.65	2492.48	3515.94	3415.34	3071.89	3597.61	4020.46	3775.21	2262.31	3416.69	2991.99	3446.47	3780.84	3335.47	3744.34	4241.81	3595.76	4490.07	4908.24	3864.49	4449.65	3704.35	5179.38	Other
575	P53946	ARP5	2104.25	1958.38	2736.77	2180.34	2089.77	2183.16	2861.51	2678.16	2926.05	2689.65	3013.39	2782.45	1626.21	2570.08	2415.29	2317.43	2723.74	2407	2527.88	2579.14	2486.81	2789.25	2481.49	2383.06	2309.83	1899.7	2620.17	Other
576	P54780	RPL15B	52255.6	45652.8	42193.4	44943.2	54854.4	64702.1	65684	69714.3	57830.3	66875.9	73250.7	74355.2	45121.9	72655.8	65813.3	65513	75613.3	72911.8	66523.7	84836.5	79055.9	87762.4	85545.3	77653.4	80935.6	65713.4	100122	Other
577	Q02785	PDR12	2749.89	2630.76	2670	2577.57	2300.01	2485.83	3751.49	4012.41	3914.43	3193.58	5017.85	5342.23	2814.22	4348.16	5090.15	5940.19	6370.67	6734.55	6416.47	5267.35	6985.01	3470.03	3322.95	3166.11	2054.54	1979.18	2006.81	Stress
578	Q02931	NAN1	2475.14	2393.06	2232.11	2636.68	2663.09	2334.89	3849.72	2966.32	2590.82	2764.69	3852.63	4440.81	2057.47	2916.4		3456.54	3221.87	3322.75	3270.37	4484.22	3199.25	3851.87	3774.01	3744.4	2853.11	3276.7	4927.16	Transcription
579	Q03497	STE20	661.375	800.396	749.041	765.284	713.456	678.86	951.773	1112.73	836.825	938.097	1202.21		484.208	904.14		1112.89	1095.4	971.631	1018.2	1163.51	1064.08	1201.04	1158.98	1200.9	930.257	231.654		Other
580	Q04264	PDS5	226.331	231.372		308.721	322.179		463.894	418.841	608.279	496.183	524.023	603.267	481.949	519.295	626.92	440.876	486.408	578.587	551.782	728.041	478.272	553.388		441.274	303.268	394.014		Other
581	Q04697	GSF2	27848.2	26515	27774.7	27068.3	26092.7	25568.5	30072.5	31184.4	27635.2	27253.5	34794.6	35531.3	19622.9	25642.3	27696.5	24344.5	25665.7	27192.4	23196	22839.8	23871.8	19537.5	22069.5	19572.6	16579.3	16109.6	20492.2	ER
582	Q04894	ADH6	22723.4	21907.5	24747.2	29158	32888.4	31120.7	56802.4	54916.5	52776	63116.7	72746.8	75226.6	45498.9	66420.6	61075.7	68139.8	73116	69943.1	71726.5	64532.4	71825.3	57810.4	57626.3	56555.1	53068.6	44372.9	66518.5	lipid metabolism
583	Q05016	YMR226C	42186.3	45288.5	42579.3	41246.3	43785.8	41099.1	47927.8	47609.4	43076.1	48035.4	54293.1	52661.7	32320.4	46040	42071.7	43682	44207.2	41824.5	42940.2	48910.3	43739.2	53403.3	50322.1	50946.7	47945.7	38367	58798.6	Other
584	Q06103	RPN7	16441.7	16167.8	16243.6	15684.2	16119	15053.5	17438.3	17102.4	15779.9	15822	17531.7	18846.2	10208.3	14267.5	13422.6	12874.2	13258.6	13057.3	13362	12945.6	13287.2	12255	12309.1	11755.9	11327.3	8886.38	13787.4	Other
585	Q07381	TSR1	1416.05	1214.4	1456.7	1236.21	1413.65	1279	1648.07	1570.67	1594.96	1682.89	1859.88	2024.61	1206.46	1819.17	1758.32	1798.93	1977.86	1879.15	1999.04	2087.38	2022.36	2048.9	1963.77	1885.06	1955.04	1539.78	2363.11	Other
586	Q07457	BRE1	1405.09	1904.21	1594.5	1622.48	2040.75	2991.55	1735.45	1609.91	1850.67	1774.92	2399.1	2352.34	1436.38	1821.46	1715.07	2227.36	1669.04	1833.24	2103.83	1515.14	1473.63	1530.97	1845.14	1991.27	1498.19	150.296	1981.41	Other
587	Q07478	SUB2	43663.3	41117.6	44372.1	42324.8	43230.2	43520.6	48450.5	50767.4	47267.8	51481.3	54929.8	58231.5	32582.3	46844	45272.5	46732.8	49553.8	47763.2	45510.5	49415.3	47079.2	52734.4	52755.3	50829	48181.3	38347.3	59196.9	Other
588	Q08162	DIS3	1660.6	1675.7	1451.54	1562.39	1545.83	1579.03	1761.24	1989.61	1597.06	1662.37	2366.49	2214.29	1106.68	1870.32	1555.48	1598.16		1994.21	1657.73	1784.71	1710.09	1757.45	1976.77	1719.77	1667.48	1564	1380.32	Mitochodria
589	Q12166	LEU9	13890.8	5308.26	6175.1	10710	7730.27	6585.9	11120.4	13797.7	11115.8	11281.6	12649.2	13188	7619.11	13114	10000.2	14127.9	11063.8	9877.71	11826.4	12816.7	11789.4	15918.4	15121.1	16407.3	15037.3	13022.5	22630.3	AminoAcid
590	Q12213	RPL7B	40861.9	39820.7	37796.9	39474.2	39111.4	38838.8	46520.4	40249.2	38341.1	41712.9	41843.1	46875.4	25174.6	35078.9	37521.9	38087.8	36482.3	39882.1	40300.7	36409.1	39073.1	36063.2	35609.4	36112.8	32120.5	26213.1	42198.6	Tanslation
591	Q12271	INP53	536.074	552.541	658.233	565.245	574.188	598.915	612.747	610.66	777.901	239.95	240.643	806.886	453.256	598.94	829.717	179.825	580.73	531.511	382.285	344.553	537.541	419.063	308.335	615.986	162.824	196.335	931.294	Other
592	P04076	ARG4	24755	22563.8	24634.3	39713.1	38038.5	40543.7	61438.8	62154.5	60493.6	52860.2	58911.5	64636.1	27374.9	34168.1	34678.5	21102.4	23252.2	24859.8	22927.7	27989.3	24683.6	31593.8	33749.9	33163.3	30477.9	26415.1	42218.9	AminoAcid
593	P05150	ARG3	40930.9	40851.1	40958.1	56183.9	55811.6	61246.9	80479.1	81994.4	79896.2	83095.8	87178.4	93857.7	49778.1	66748.4	63934	67489	69650.4	69556.9	71114.8	65523.8	70697.3	65998.7	66062.1	63400.2	56475.9	45907.9	70237	AminoAcid
594	P09032	GCD1	2678.22	3273.02	3389.16	3182.01	3481.32	2911.58	3529.13	4352.02	3533.31	3017.59	4251.74	4488.67	2891.76	4149.38	4369.66	3945.62	3783.56	3309.8	3786.54	3943.08	4080.84	4848.21	4164.39	4053.25	4317.93	3314.69	5028.15	Tanslation
595	P09880	TRL1	857.31	732.448	947.037		858.212	820.068	970.063	961.017	947.529	1133.18	1177.17	1238.87	711.669	1000.82	1121.1	750.933	980.909	1172.44	1181.2	1027.68	1126.7	1052.76		1104.59	1099.01	748.988	975.326	Stress
596	P09938	RNR2	171348	164442	181531	170308	160516	169513	149263	147781	148301	130902	133621	155186	65350.4	78961.6	80628.5	69166.6	69211.5	71098.7	53909.2	41240.4	52788.1	40226.5	39979.2	39328	36362.6	28357.6	45730.8	Nucleotides
597	P0CX40:P0CX39	RPS8B	210079	218427	219172	234245	232643	245929	304579	309750	302820	337096	366315	396196	225151	337650	322433	355614	361430	372475	374967	414355	372853	466763	460539	444368	423373	356001	535166	Tanslation
598	P0CX83:P0CX82	RPL19B	201094	229807	225264	244420	233688	264933	321329	324625	327153	351206	389313	413523	246335	373466	341226	400571	410405	418298	410790	429183	408850	473108	467399	456902	430661	353951	536642	Tanslation
599	P13433	RPO41																127.911		295.461	363.295	192.568	336.885	301.213	299.394	494.757	250.996	264.396	499.889	Transcription
600	P20424	SRP54	2882.2	2331.59	2696.59	2890.12	2843.11	3223.66	3558.56	3918.7	3361.89	3869.7	4892.97	3917.32	2668.45	3798.26	3298.28	4100.79	4227.43	3940.71	3943.47	4058.87	3788.58	4428.11	4335.64	4112.33	4087.7	3306.62	4822.84	ER
601	P21304	PWP1	6587.75	5786.66	6125.91	6146.96	6056.96	6373.3	7940.76	7558.45	7570.55	8082.61	7604.68	8774.21	5477.32	8010.59	6663.77	7451.33	8300.65	8530.87	8332.7	7851.05	7908.83	8885.58	8231.77	7784.12	8218.14	6204.17	9753.07	Other
602	P25298	RNA14	527.785	531.49	636.058	611.935		497.764	938.096	556.181			859.996	1171.27	681.477	535.558		946.625		893.117	791.377		915.2		602.995		1070.29	891.45		Mitochodria
603	P25491	YDJ1	62665	63737.8	60970.4	57956.8	56946.6	58683.3	50812	52062.1	51293.2	51259.7	55779.1	55087.7	32159.8	47435	43864.8	45876	48885	50227.3	49989	49627.4	49507	48138	48586.9	46624.4	44733.9	35246	55692.8	Chaperon
604	P25644	PAT1	3340.85	3326.97	3720	3489.22	4158.88	3844.24	5085	4610.43	4495.29	4543.94	4804.39	5903.75	3470.93	4229.1	4935.31	3977.06	3804.55	4493.38	4418.77	4576.76	4468.43	3936.82	4469.98	3953	3648.57	3197.52	4209.18	Other
605	P29547	CAM1	33999.3	33728.1	33186.7	32132.8	30669.8	29589.9	30954.2	29480.3	30023.4	29234.2	31823.2	33528.5	17553.2	24333.7	24317.2	22840.6	23538.1	23668.1	22272.4	24601.3	21915.2	25315.8	25343.1	24116.8	21151.8	16256	26290	Tanslation
606	P30902	ATP7	67929.6	70207.6	71396.8	82860.7	89983.5	86210.6	117249	122615	115975	132010	147933	149297	89055.3	132784	117406	135299	141364	137720	139331	148205	136392	133411	134598	123432	110970	87360.1	117495	Mitochodria
607	P30952	MLS1	28965	29189.4	29657.3	42604.5	39187.3	44206.3	50226.5	48622.2	50868	56232.5	58856.3	63638.9	41055.4	52906.7	53721.2	61012.8	59333.1	65709.1	70945.5	70882.3	71676.7	37531	38159.4	30040.7	16319	11748.4	14977.5	Other
608	P31383	TPD3	8690.21	9086.52	8888.48	8614.1	9116.91	9103.5	8628.52	9523.39	9124.94	7666.58	9740.57	10112.5	4742.48	6333.22	6897.28	5110.9	5706.54	5971.5	4893.71	5589.86	5570.57	5197.83	5198.43	4784.31	3980.7	3739.89	4981.86	Other
609	P32288	GLN1	20370.2	20530.1	20780.9	26730.2	28825.8	29019.4	49439.1	51184.3	47801.4	61093.8	71831.5	69923	46163.6	70917.1	66436.5	70414.9	73553.4	75167.7	75416.8	87365.2	79751.9	91653.1	92165.2	92540.7	83634.6	66626.1	98290.4	AminoAcid
610	P35845	SWH1	2251.68	2327.42	2405.31	1888.77	2303.39	2048.3	2117.27	2058.08	2085.01	1989.59	1757.54	2030.11	1267.07	1514.97		1520.33	1483.93	1782.05	1444.75	1638.27	1937.58	1499.08	1331	1379.63	989.081	953.765	1217.35	ER
611	P36114	YKR018C	4837.89	5107.55	5536.56	4340.33	4213.25	4497.56	3996.22	3987.92	3884.66	3609.26	4248.75	4595.27	2061.11	2469.78	2921.68	2255.11	2942.05	2543.87	2535.43	2729.52	2432.81	2346.24	2901.64	2281.69	2157.35	1969.08	2431.19	Other
612	P36161	NUP133	697.367	664.666	703.039	806.949	474.072	711.602	732.505	830.8	859.143	619.694	770.014	987.62	437.411	674.255	531.896	596.261	594.671	751.708	677.81	694.903	718.495	740.019	692.948	786.662	535.742	518.246	689.597	Other
613	P37302	APE3	38115.1	36749.4	38268	36871	34115.7	38664.5	37563.5	36254.5	38397.8	34069.5	35805.9	41311.6	19827.8	25482.8	25148.1	21743.6	22366.9	22562	18547.7	17390.3	19819.8	17394.2	17786.9	16489.9	14589	11372.6	16199.9	Other
614	P38137	PCS60	10344.7	9936.5	10573.3	15976.8	15490.7	16187.1	16656.8	17342.9	16045.9	15138.3	14415.2	17948.5	8051.84	9443.19	9592.27	7025.25	7164.68	7122.88	6767.35	6934.96	7005.35	6575.53	6325.71	5981.14	4952.21	4054.62	5466.14	Other
615	P53341:P38158	MAL12	8994.17	8572.32	9177.09	8493.93	8422.35	8855.43	6132.89	6679.79	5901.2	5143.55	5935.92	6435.03	4060.58	5972.07	5845.33	7104.4	7652.15	7924.91	9632.65	13057.4	10366.6	13627.5	14112.3	13437.4	11886.3	8934.32	11170.1	Other
616	P38167	ECM21	921.123	883.679	926.396	1067.22	961.383	1044.9	1557.42	1697.12	1678.49	1557.1	1515.44	1881.02	657.448	1077.93	1030.08	805.05	1192.9	866.348	631.384	742.497	855.096	598.801	526.185	517.178		344.391		Stress
617	P38295	EHT1	11201.8	10816.5	10756.4	13789.7	14811.7	14583.2	23921.7	24691	22491.5	24851.3	26847.2	29700.6	16439.5	22963.3	21635.5	20701	22148.4	22418.9	23985.1	34057.7	25619.2	33511.9	34906.1	32326.6	29619.6	22000.9	33441.2	Mitochodria
618	P38333	ENP1	1915.23	2043.4	2047.01	2616.52	2410	2165.16	3155.22	3252.4	3133.36	3480.8	4277.96	4204.79	2627.13	3687.92	2772.33	4235.83	3653.92	4053.79	4165.49	4376.94	4323.09	4321.99	4220.31	4770.23	4319.46	3435.55	5626.01	Other
619	P38810	SFB3	1878.97	1818.08	1956.64	1991.04	2145.83	2035.68	3006.58	3174.08	2788.94	2707.38	3146.09	3136.3	1969.01	2599.41	2567.33	2712.47	2805.59	2822.87	2686.02	3145.43	2895.07	3287.05	3361.27	3141.88	2804.09	2252.36	3364.24	ER
620	P38891	BAT1	35893.6	34313.9	36980.4	39601.4	39473.1	39472.3	45663.1	48415	46797.4	49277.6	52889	54751.9	32513.4	46959.1	45185.7	46579.8	49852.3	48758.8	49762.9	52434.6	50728.1	58914.9	57903.4	56813.6	57007.8	46772.8	71772.4	AminoAcid
621	P39076	CCT2	21918.9	20981.1	21175.2	21171.5	23092.7	21301.6	27833.9	27555.3	27385.1	28858.3	28016.2	32503.9	18833.6	28391.9	25152	28462	29379.5	28283.8	27756.4	27689.3	27677.3	29410.8	29313.1	27144	26571.2	20755.4	33890.4	Other
622	P39079	CCT6	16078	16371.6	15962.4	16569.3	17018.6	16738.2	19827.6	20310.6	19466.9	20873	22738.6	24443.8	13901.1	19551.7	19213	19916.3	20308.2	20459.1	20397.7	20353.3	20356.3	20802.8	20481.6	20827.4	18638.9	15111.6	23361.3	Other
623	P39517	DHH1	7064.24	6367.86	6564.13	5967.53	6957.95	6873.41	8227.37	9077.84	8791.01	9393.33	10652.3	10772.6	6722.8	9428.34	8521.21	8918.53	9342.07	9150.92	8771.78	9650.45	9049.28	10373.1	10850.2	10027.8	9849.5	8102.4	12666.9	Other
624	P40414	TPM2	25761.5	22624	27873.7	21663.6	22520.1	22931.8	22674.9	23423.1	24280.4	24452.5	22287.7	25961.1	15240.6	21055	21276.9	18440.2	22169.3	19703.3	19392.6	18411.9	20180.1	16602.6	14669.3	15062.4	12449.7	10172.3	14464.7	Other
625	P40510	SER33	32020.4	30751.4	31674.9	32663	32937.4	35560.1	41125.5	41486.8	39343.4	41980.8	46282.4	52215.3	28574.6	40775.9	41633.3	42456.2	42760.8	45527.9	46765.7	47475.5	49590.2	48308.5	45928.2	46745.7	42648.9	34813.5	59616.1	AminoAcid
626	P47018	MTC1	4661.14	4359.46	4927.45	4783.54	4873.96	4211.61	6049.43	6585.6	5703.06	6714.61	6876.37	7384.97	3631.27	5400.13	5465.43	4768.36	5515.5	5105	4534.77	5230.01	5171.51	4179.09	4950.49	4478	3903.05	3336.45	5440.59	Other
627	P47166	SGM1	1122.41	1030.87	1456.69	923.19	980.025		997.059	1176.05	1291.31	844.686	1174.95	1148.38	744.48	924.429		891.586	1081.36		838.377	3722.76		700.345	692.143		684.567	653.219	753.13	Other
628	P48415	SEC16			412.474				652.966	720.328		671.809				575.828		357.418	638.974			495.682	866.319				319.847			ER
629	P52893	ALT1	14768.8	13391.9	14494	12209.7	11339.7	14603.4	15501.4	15092.4	14678.5	15731	19562.4	19333.4	11929	15630.1	16194.6	16657.9	14916.1	14324.8	10415.7	8849.31	11430.8	9199.84	8553.24	7514.15	7414.85	5948.48	8814.82	AminoAcid
630	P53101	STR3	7824.43	7579.34	7814.24	12457.5	12590.9	13131.9	16725.5	17358.2	17182.8	14116.3	14391.6	16667.9	7132.03	9498.87	8632.87	6221.42	5512.68	6536.15	5471.09	5019.88	5748.82	5720.26	5555.18	5663.48	6010.69	4095.53	6900.57	AminoAcid
631	P53303	ZPR1	18532.3	17682.6	18335	16946.4	14471.1	15930.9	12181	12580.9	12103.2	12003.6	12680.8	13696.7	7241.66	10224.2	9826.26	10693.4	10442.2	10934.4	10758	10552.8	11411.3	11678.9	11676.3	11334.5	10974.4	9141.43	15269.7	Other
632	P53881	MRPL22	3710.61	3564.27	3736.47	4645.77	4434.73	4117.6	7479.99	7758.83	7680.82	7935.36	9825.65	9797.23	6153.81	9071.85	7490.21	10170.3	10259.8	10321.1	11790.9	12659.3	11582.5	12786.8	12689.8	10886.6	11260	8697.34	13364.6	Mitochodria
633	P53982	IDP3	609.031	766.365	844.047	808.515	704.68	732.711	823.521	1101.35	1054.05	711.532	819.811	766.848	455.335	321.676			502.422	329.212	394.759									AminoAcid
634	Q00055	GPD1	66278.6	66404.8	64796.1	61313.7	58910	62281.2	51685.2	52567.8	53502.7	44212.6	42831.5	46328.5	20130.5	23603.9	24443	15724.1	15081.4	14735.3	12886.1	16223	14013.4	18673.1	18327.9	17903.3	16687.1	12842.4	20483.4	lipid metabolism
635	Q01939	RPT6	40479.4	41353.1	41700.8	39792.8	39990.1	40163.4	41382.5	43363.4	41797.5	42427	45199.4	48210.8	25918.6	37507	34916.4	33883.8	33563.3	34502.2	33282.2	33497.6	32978.9	33451	33761	32226.4	30636.8	24131.4	36317	Other
636	Q02792	RAT1	879.477	611.468	809.076	826.553	912.452		1131.24	1314.84		1204.97	1436.52	1415.81	835.202	1120.34	714.593	1101.47	1249.52	1207.21	1160.69	1588.01	1001.49	1385.09	1361.02		1207.5	1032.15		Transcription
637	Q03834	MSH6	132.477	156.389	256.277					202.537	80.0666	519.165	325.009			191.335				352.152	194.867	203.834	266.699		146.67		179.713			Stress
638	Q04062	RPN9	36418.8	35174.4	34543.7	36016.8	32802.5	35318.1	36175.1	33281.1	31597.2	33480.8	33346.5	37066.4	21349	26573.5	26861.7	22062.6	24617.6	25754.8	25997.1	21817.9	24407.3	19695.8	21766.3	20132.2	21059.3	15626	25149	Other
639	Q05567	DPL1	4636.42	4256.14	7012.88	4885.31	5069.2	5868.3	5031.02	6165.05	5099.77	4409.26	5546.79	5973.98	2389.05	4316.07	4743.85	4314.67	4675.02	4248.7	3528.84	3341.41	3934.29	2904.23	2809.76	2709.44	2272.37	2084.79	2998.54	lipid metabolism
640	Q06839	YPR097W				263.513		167.404	300.036	270.085	228.61	282.517	256.197		84.8361	240.425			186.979	319.41	168.654		163.765	180.483	151.276		179.275		168.26	Mitochodria
641	Q08968	FMP40	709.469	884.487	767.987	1018.21	690.355	959.679	556.182	532.943		457.902		288.402	226.036	286.211		229.404		284.372	203.645			160.163						Mitochodria
642	Q12114	CHS5	4409.08	4151.15	4458.23	3772.93	3723.13	4004.78	4295.76	4489.37	4110.51	4281.49	4610.68	4624.18	2676.56	3626.29	3625.96	3736.09	3707.58	3754.47	3554.94	3677.39	3477.98	3467.5	3236.68	3439.56	3191.04	2340.63	3582.51	Other
643	Q12386	ARP8	1695.33	2034.37	1891.73	1650.72	2025.67	2031.39	2295.61	2535.06	1937.2	2093.43	2090.99	2400.23	1555.28	2247.72		2100.91	2108.17	2181.26	2024.96	2170.71	1877.34	1335.18	1807.81		1533.05	1423.63		Other
644	Q99297	ODC2	5687.44	4729.49	4562.73	9077.26	7962.15	8509.57	11706.9	11166.8	10042.6	11865.5	10529.9	12848	7021.41	7303.49	8676.32	8241.51	7207.29	9052.21	10384	10460.2	9811.05	11989.3	9123.42	11873.2	10051.6	6168	15493.4	Mitochodria
645	P00724-2:P00724	SUC2	60369.4	68097	69355.2	39282.8	38643.3	37241.6	19503.4	20872.3	20591.6	19919.9	19286.8	21630.9	12350.5	16245.4	15200	13202.7	14335.4	13071.2	14770.5	11880.1	15235	12079	12089.7	11444.2	11549.5	8504.36	12227	Mitochodria
646	P02381	VAR1	1763.55	1980.04	1799.86	2181.89	2198.14	2523.24	3585	3931.73	3484.69	4401.22	4556.67	4417.82	2344.7	3858.72	3795.45	4339.51	4183.91	4673.58	4598.35	5164.37	4824.32	5383.82	5149.17	5768.23	4874.59	3729.19	5723.09	Mitochodria
647	P02992	TUF1	25900.2	24243.2	26311.7	32485.1	30866.5	33566.7	57020.9	58122.6	54536	61799.5	67595.1	71999.1	41964.1	64881.7	60516.7	69520.3	75903.1	75664.2	81114.7	93233	81448	94638.7	94577.8	90550.2	82236.9	65090.4	92311.8	Mitochodria
648	P05626	ATP4	76460.1	73024.1	73775	91403.3	89783.9	92549.8	122813	120642	116435	124591	138500	150114	91966.3	116327	119406	133923	120794	142556	141899	146398	138798	136405	119200	130319	111988	70615	125364	Mitochodria
649	P07246	ADH3	62377.6	62387.6	68909.8	60957.7	63244	65059	66938	68472.8	66881.6	73806.1	80378.2	86901	50810.3	77076.9	72941.9	81954.9	85496.8	86062.9	90220.2	93795.4	89304.2	92741.8	92326.4	85735.7	77341.4	60551.1	90222.4	lipid metabolism
650	P07273	DST1	3258.44	3537.16	3815.73	3895.87	3611.07	3952.45	5507.59	5850.59	5385.47	6138.07	6436.68	7231.69	3988.24	5518.53	5698.63	5692.26	6212.25	5648.75	5683.57	5958.21	6038.72	6183.63	5854.32	6016.55	5638.67	4396	6980.19	Transcription
651	P09064	SUI3	9380.76	9950.72	10260.7	9482.59	10316.7	11675.5	14149.4	14909.9	14315.1	15150.6	18113.2	18226.4	11019.1	17299.2	15007.9	16791.5	18659.4	19007.3	18983.1	21628.7	20059.3	21074	21158.7	20250.6	20422.4	14710.9	24119.9	Tanslation
652	P0CX30:P0CX29	RPS23B	151952	152752	164006	154303	158555	168885	205494	210023	218806	227580	248127	261133	153729	224651	219337	239389	241053	263544	261003	287790	255279	313937	303302	304303	287959	237391	360651	Tanslation
653	P0CX52:P0CX51	RPS16B	208193	206646	210161	211093	220890	223166	290150	289472	276208	317642	347731	363771	215007	323882	286033	331823	345850	346556	358700	390989	354553	438938	429824	416357	400895	331039	499008	Tanslation
654	P10080	SBP1	78171.5	82502.8	84052.2	78204	75756.1	80342.2	79876.9	77672.4	78218.4	76637	84151.7	86896.6	49915.7	72144.5	65865.6	65987	68813.3	68966.7	66113.1	68418.2	66602.1	67502.8	67693.4	62936.5	59670.4	46341.1	65849.9	Other
655	P10081	TIF1	148041	147891	150328	148730	153044	156689	191552	210201	187359	200704	232813	246246	139639	207680	191401	205375	214772	221373	221772	236672	230118	250482	250286	246572	233685	186484	285044	Tanslation
656	P10614	ERG11	8542.21	7619.29	8677.08	12195.9	11700.8	12243.8	28474.2	29218.3	26501.4	25722.3	33417	38616.1	16807.3	20385.4	22287.1	16614.6	17446.5	18208.6	16753.3	15537.4	17589.6	15451.4	14762.8	13744.7	11457	11535.2	14027.1	lipid metabolism
657	P10662	MRP1	3853.96	3896.59	4349.39	3983.99	4140.6	5007.54	6682.14	7609.17	6337.46	7881.23	9140.52	8655.34	5743.1	9231.87	8240.82	9884.75	10528.1	10339.9	11627.2	13460	12365.6	13233	12082.3	11975.6	11553.6	9391.83	12113.6	Mitochodria
658	P11914	MAS2	6622.19	6562.97	7741.26	6600.82	7153.2	6869.38	10487.4	10843.1	10299.3	11608.1	13467.1	14459.4	8731.84	13538.3	12879.5	14238.8	15433.4	15509.1	17077	20868	18681.8	22376.5	22623.3	20794.4	19188.5	14438.7	21458.6	Mitochodria
659	P11938	RAP1	2301.54	2008.12	2178.46	2524.99	2504.12	2455.12	3602.02	3663.35	3596.95	3705.74	4373.09	4608.47	2714.1	3709.55	3851.21	3650.77	3798.88	3848.03	3406.21	3666.88	3125.47	4320.65	3774.89	3863.95	3742.46	2874.83	4088.28	Transcription
660	P15303	SEC23	9229.31	10061.6	9920.85	9794.56	9342.85	9514.54	11519.1	12134.2	11419.2	11762.4	13532.4	15112.8	7674.17	10766.7	13086.8	10491.4	10992.8	11759.2	11242.9	11791.1	11077.5	11744	10943.4	10724.7	9434.22	8561	12277.2	ER
661	P18899	DDR48	24175.2	26718.9	25275.4	28085.9	28697.6	29792.6	23592.3	24529.9	24441.7	18748	18956.8	19092.7	8146.49	9249.76	10665.1	4168.36	4388.39	4077.4	3515.13	3993.92	3315	3904.75	4204.74	3935.46	3496.4	2717.57	4135.17	Stress
662	P21182	SPE2	2339.83	2168.08	2382.14	2207.48	2240.91	2098.52	3387.13	3158.15	2922.05	3671.41	4646.08	3828.67	2432.52	3212.38	3552.55	3531.99	3566.81	4040.14	4072.32	3888.93	4206.6	3728.01	3518.62	3799.61	3449.43	2411.84	4881.56	Other
663	P21951	POL2	55.7122						6.05724												35.9518	59.9228				33.9786	43.5585			Stress
664	P21965	MCK1	15731.2	15915.9	17424.6	15875.5	17371.4	15735.6	18674.1	20936.5	18469.9	20305	23385.9	23948.1	13125.1	19825	18393.5	19288.1	19898.9	17787	17944.3	17831.5	17692.8	17686	16991	15315.4	14131.7	11578.2	16211.2	Stress
665	P22203	VMA4	49633.6	54396.2	52653.3	50445.6	53138.2	55850.3	66857.2	68102.8	68229.6	73392.8	77945.7	77309	46364.2	67262.7	59701.4	65141	68994.4	65485.1	62297.2	69657.6	65029.7	76614.4	73554.8	71943.1	70149.8	56911.2	88403.6	Energy
666	P27614	CPS1	20577.9	19039	19791.8	17808.4	16240.4	16599.7	18033.5	17582.9	16011.2	17819.3	18720.9	19458.2	10667.1	13419.1	15471.5	14404.9	13361.7	13744.9	11170.1	9214.36	11071.9	8653.51	8140.09	9244.36	6930.58	5255.61	8890.26	Other
667	P28834	IDH1	55923.8	55623.1	58501.4	60212.7	67694.1	68319.3	97297.8	102247	98286.8	116276	128365	134401	87425.9	135945	131545	157500	168932	171522	202493	242410	203718	224320	220652	208750	176997	130927	169106	AminoAcid
668	P30771	NAM7	1708.02		1949.21	2015.07	1520.47	1344	1753.07	2114.14	2113.54	2317.11	2260.31	2361.19	1421.25	2263.14		2177.53	1970.98	1893.5	2098.29	2076.34			2576.19	3233.39	2068.98	1489.97	1960.66	Other
669	P32179	MET22	16941	16830.5	17387.4	18589.6	19733.6	20665.1	24767.5	24982	23899.6	24316.5	26633.8	29999.7	15165.7	19843.6	19932.4	19589.8	19444.4	19127.8	19413.8	19818.6	19547.9	23149.7	23013.8	23183.4	22696.8	17912.6	30304.3	Stress
670	P32368	SAC1	3470.99	3432.17	3570.27	3923.83	3685.74	3930.66	4892.32	5170.22	4720.83	4632.33	6098.17	6909.74	3518.35	4683.03	4753.09	4611.71	5305.62	5377.59	4703.42	5166.19	5037.77	4990.02	5111.46	4576.19	4231.79	3897.49	5235.42	ER
671	P32419	MDH3	57574	53962.2	57589.2	49839.1	53745.9	51719.5	50695.3	52649.3	48346.9	52038	53813.2	56437.9	34082.5	48572.5	46945.1	43784.3	47392.8	45443.1	41465.5	39171.5	39566.4	33740.3	33479.4	31257.8	26929.3	19416.4	27859.3	Energy
672	P32468	CDC12	9813.19	10803.1	11383.9	11044.7	10300.8	11002.8	13226.3	14132.7	13043.3	14875.3	15762.1	15885	8974.3	12849.6	12299.7	12305.2	13218	13408.8	12560	10863.3	11766.6	10772.8	10545.8	10398.1	9174.61	7381.5	11223.4	Other
673	P32795	YME1	2069.77	2028.06	2374.55	2300.52	2662.22	2206.13	3323.22	3616.93	3049.41	2543.23	4497.37	4650.38	2774.57	3909.39	4291.81	4504.11	4767.55	4821.68	4636.04	5562.53	5078.2	5586.2	5485.25	5275	4626.15	3777.99	5951.31	Mitochodria
674	P34237	COY1	4033.75	5295.06	3701.06	6889.6	4978.36	2512.48		2731.4	2389.48	2171.72	1697.56								1470.02									Other
675	P38069	MNN2	2679.54	2317.07	2712.19	2743.53	2730.2	2550.15	3221.13	3883.32	2805.01	3457.51	3669.26		1935.92	2675.9	3255.17	2617.51	3074.04	2954.57	2833.47	3333.91	2245.49	3530.02	2993.51	2579.33	2741.29	2080.69	2977.32	Other
676	P38071	ETR1	70807.2	74843.8	75028.1	71203.5	67217.4	72913.5	52686.1	55998.2	52538.6	45713.4	43992.3	47186.9	21935.7	28822.7	26214.8	21351.9	22669.6	20305.8	15110.1	12362.8	15187.4	9570.94	9258.46	7589.03	6689.16	6552.71	6327.86	lipid metabolism
677	P38627	URA8	8269.01	7262.17	7658.58	6743.04	4886.41	7836.81	5801.46	5500.8	6347.38	4836.62	4525.84	6385.07	3004.69	4451.38	4320.78	3620.82	3088.74	4224.64	4078.77	3984.17	3814.44	3280.96	3808.01	3227.92	2754.96	2420.33	3121.05	Nucleotides
678	P38697	IMD2	1889.39	1762.47	2008.96					1427.55		1603.6			1634.35	2957.98	2740.81	4000.95	4279.88	4377.15	4758.45	4896.73	5281.09	5194.99	5556.49	5559.17	4973.78	3463.52	4479.24	Nucleotides
679	P38789	SSF1	2620.13	2601.04	3502.14	3647.91	3502.19	3426.3	4574.58	4822.69	4840.55	5503.81	5597.8	6321.99	3743.45	4701.44	4608.03	5365.51	5710.94	5424.95	5158.56	5680.2	5964.01	6226.81	4857.03	6742.25	5947.5	3598.99	7359.05	Other
680	P40157	VID27	1602.49	1669.86	1825.57	1768.05	1271.1	1571.63	1190.6	1773.55	1461.91	1667.62	1482.9	2630.39	1090.3	1436.87	1559.29	1451.12	1540.34	1849.27	1711.12	1664.92	1768.19	1653.62	1626.17	1478.59	1430.48	1159.21	1714.27	Other
681	P40217	TIF34	11621.4	11200.9	11758.5	11935.3	11632.2	12293.3	15768.9	16245.5	15418.2	17876.4	19310.2	20564.1	12472.8	18045.8	17565.2	18849.7	19819.3	19554.8	20252.4	20354	21005.6	20721.1	20767.5	20491.3	18809.5	15131.5	23348.8	Other
682	P40482	SEC24	26446.3	26332.8	26419.8	24936.2	23245.4	24111.9	25449.2	26204.1	25622.5	24773.7	29441.7	30257.1	16521.9	23019.8	23996.5	22401.6	22394	23892.4	22817.9	23345.7	22097.1	25568.2	24641	24050.9	22202.6	19231.6	27367.2	Other
683	P40498	UTP25	1845.12	1795.21	1865.33	1824.08	1754.36	1703.53	2164.19	2252.48	2012.43	2217.09	2637.64	2711.91	1619.98	2214.17	2294.91	2540.83	2483.8	2433.18	2422.68	2295.95	2323.62	2367.65	2503.44	2317.59	2273.42	1848.22	2798.31	Translation
684	P40850	MKT1	5752.78	5838.1	5973.92	6514.79	5930.09	6306.34	8238.11	8299.22	6886.3	8112.17	9898.3	10274.8	5375.71	7606.2	7612.48	6759.48	7907.49	8451.67	7860.4	8935.59	7378.04	8538.34	9208.3	9006.89	6998.98	7292.16	10172.4	Other
685	P41277	RHR2	28841.5	29941.9	30222.6	28417.4	28181.9	29096.5	30864.2	28248.9	29536.9	25786	25858.4	28479.8	13145.6	15300.6	15535	12371.1	13191	13282.8	10578.6	13905.7	13006.9	16449.9	15525	17678.5	18893.4	18772.7	41601.6	lipid metabolism
686	P41697	BUD6	528.618	404.646	645.986	479.554	444.626	341.586	587.852	624.028		413.045	470.385	656.866	415.172	484.416		455.49	434.355	443.485	452.621	416.84	451.224	393.502	487.767		323.416	269.691	336.508	Stress
687	P43567	AGX1	18614.5	18962.9	18754.6	26803.4	29374.4	28138.6	42326.4	41587.8	39579.8	50502.8	53087.8	58531.7	38137.4	60668.2	57841.4	62538.3	61911.7	61163.4	62117.9	67089	62844.9	45352.6	48119.4	40452	31580.2	20707.9	23659.8	Mitochodria
688	P46681	DLD2	8693.86	7119.47	7932.48	8778.01	8914.04	8520.94	9896.24	10610.5	10324	10606.5	11644	12955.2	8107.22	11478.7	11654.6	11753.2	10788.2	12156.6	12231.2	10003.7	12064.4	9668.3	10803.9	10534.1	9759.84	7280.21	10678.4	Mitochodria
689	P47176	BAT2	18900.1	18473.2	16954.9	18342.3	18133.4	17281.1	20036.3	19878.4	17982.3	18426.9	18240.6	24015.2	12730.6	20584.1	14588.2	22149.8	18470.1	21948.4	17231.1	6701.51	18716.3	4163.19	3702.35	3171.27	2868.6	1584.35	3641.75	AminoAcid
690	P48234	ENP2	704.424	580.286	754.907	614.016	596.884	968.498	882.154	1000.86	875.063	1011.9	1136.22	1161.61	694.455	1067	1016.23	982.194	1101.17	1110.67	1140.42	1201.53	1124.37	1240.11	1220.2	1222.5	1313.23	977.744	1526.87	Other
691	P48360	ARH1	1933.24	1964.92	2095.66	1816.7	1856.74	1876.82	2006.62	1886.63	2102.76	2057.3	2714.5	2735.51	1362.49	2118.19	2012.33	1985.62	1942.07	2298.6	2345.64	2432.57	2102.97	2261.8	2191.24	2047.22	2047	1625.8	2401.22	Mitochodria
692	P52488	UBA2	4634.66	3909.58	3923.1	3846.71	3904.46	3573.62	3548.2	4193.59	3488.13	3792.14	4494.8	4432.52	2399.18	3295.7	2994.18	3409.23	3117.44	3010.78	3253.54	3512.41	3135.39	3739.7	3389.49	3143.72	3226.3	2282.76	3697.02	Other
693	P53276	UTP8	1309.09	1030.27	1339.57	1766.4	799.118	1440.41	1204.42	1843.65	1898.38	1328.61	398.456		1046.68	917.319		1464.69	599.79	1784.33	1541.63	1299.93	2042.95	1627.8	1404.81	2628.75	582.978	715.441	1910	Transcription
694	P53292	MRPS35	2112.78	2146.79	2456.3	2709.89	2642.17	2874.4	5135.99	4863.23	4444.52	5352.63	6318.17	6287.34	3668.17	5657.05	5146.56	6213.95	6845.15	6729.78	6988.91	7988.86	6826.94	7825.71	7907.02	7110.11	6744.3	5382.95	7438.39	Mitochodria
695	Q02326	RPL6A	48661.9	49278.4	51918.5	57303.9	56759.5	58845.4	62538.8	74264.2	70544.5	80043.9	92414.5	92960.3	54786.8	82380.2	80403.5	85779.5	91490.8	96711.6	92843.3	100538	94286.9	108394	107152	104779	99923	83291.7	124003	Tanslation
696	Q04175	SXM1	1533.5	1404.01	1622.75	1536.3	1498.29	1374.64	1624.52	1708.07	1611.11	1482.71	2116.62	2153.96	1373.73	1408.88	1580.03	1464.63	1507.46	1632.12	1387.99	1694.52	1696.97	1611.25	1767.37	1655.02	1413.07	1422.13	1916.85	Other
697	Q05040	FAR8	1685.33	1930.12	1992.2	1733.96	2231	1993.6	2327.1	2533.85	2138.42	1982.41	1651.94	2880.57	1599.64	2008.46		1982.24	1836.91	1869.52	1803.48	1652.96	1824.55	1812.66	1548.4	1668.4	1715.72	1109.72		ER
698	Q05775	HCR1	27127.6	27338.5	26816.3	22488.2	23159	23272.3	27758.1	29566.6	28147	28772.9	33399.2	33819.6	19294.5	28771.3	26262.9	27617.8	29479.6	28179.6	29259.7	31336.8	29269.8	32009.5	31943.4	31681	28581.8	23557.7	34946.4	Other
699	Q06151	DCS1	25449.2	23695.9	25576.8	21540.8	22422.4	22315.7	20726	19436	20641.5	17130.2	17215.9	19519.7	8821.47	11861.7	10853.7	8531.5	9079.8	8507.86	7543.36	8078.24	7454.07	8022.72	7521.76	7305.41	7168.5	5048.28	7323.48	Mitochodria
700	Q06505	SPN1	2514.43	2402.6	2595.41	2749.97	2894.4	2891.06	3616.67	3822.37	3376.44	3963.94	4232.08	4393.07	2489.69	3910.02	3338.09	3328.75	3673.52	3392.36	3420.32	3415.53	3534.38	3445.78	3281.93	3043.59	2967.99	2212.49	3315.21	Transcription
701	Q06506	RRP9	2426.4	2343.35	2927.81	3789.83	2608.17	2417.58	2427.14	3649.91	2497.44	2557.31	3528.81	3454.26	2201.33	3044	2857.56	3288.03	3525.66	3453.42	3398.91	3705.52	2873.79	5145	3789.55	4002.7	3134.51	2760.57	4740.18	Other
702	Q08641	ABP140	2581.26	3199.43	3148.63	2920.74	2986.22	2486.14	4089.21	3817.45	3675.39	3860.54	3812.64	4873.32	2611.28	3836.4	4130.91	3812.35	4013.73	3745.26	3608.15	3783.13	3422.94	4143.29	3937.29	3394.59	3496.79	2711.26	4280.53	Other
703	Q08723	RPN8	25697.3	25031	24753.2	24928.5	24348	22921.3	26181.8	26264.6	25123.8	27392	29050.2	28672.9	16419.3	22865.8	22035.3	21074	20765.9	21305.4	20673.8	19855.1	20713.5	18328.2	17673	17802.1	16427.5	12330.2	19842.7	Other
704	Q12000	TMA46	2515.31	2879.91	2431.13	2845.35	2971.53	2947.1	4459.15	4673.33	3988.35	5033.2	6374.63	5364.09	4309.33	5980.99	5340.37	6473.05	6499.27	6305.85	6617.41	6879.29	6941.4	7077.57	7077.86	6622.39	6342.28	5021.11	8132.56	Other
705	Q12123	DCS2	42390.9	45980.2	47345.2	44018.2	43701.4	47507.9	35318.6	33645.4	35360.5	26900.1	25518.6	27942.7	9594.75	9540.15	9751.8	3158.58	3225.85	2984.61	2439.5	2692.25	2026.44	2265.97	2288.33	2669.57	1815.27	1609.9	3462.84	Stress
706	Q12189	RKI1	6219.62	7085.5	7052.47	9321.09	8226.69	8673.48	12105.6	11758.4	12128.1	15019.7	16426.5	16526.8	10596.6	16695.1	15087.9	17875.3	17553.4	17476.3	17072.8	18199.1	18328.7	16702.7	15919	15218.7	13561.5	10686.3	14954.8	AminoAcid
707	Q12230	LSP1	295369	317871	311147	321107	301885	286066	248963	253239	265278	218266	226296	236347	109326	149236	146838	127182	125479	120812	95939.9	87197.5	96694.5	77821.8	79224.5	72588	66169.2	50014.8	62039.7	Stress
708	Q12265	PRS5	11379	10301.7	12962.1	11724.5	11596.7	11115.5	14671.9	15048.1	13730.6	16191.8	18033	18490.1	10750.2	15426.1	16446.1	16683.8	17102.3	16433.7	14948.2	15884.6	15361.7	17023.3	15869.3	15439.2	14535.1	11947.5	17212.1	AminoAcid
709	Q12443	RTN2	10139	12737.5	15093.6	14603.8	10625.2	13034.6	8447.68	6025.58	7783.88	5375.08	5538.5	5222.64	1769.96	1078.1		449.359	537.7	1005.3		380.013		379.973	431.024	1676.91	458.344	312.941	1269.69	ER
710	Q12458	YPR1	20066.3	18612.5	20337.4	15920	15903.6	16138.3	12846.7	12378.2	12903.8	11547.5	12633.6	13459.5	6876.68	8440.94	8304.1	7108.84	7248.04	7367.51	6167.4	7740.88	6501.84	10258.3	9507.64	10354.1	10236.9	8399.77	14419.5	lipid metabolism
711	Q99207	NOP14	272.786	302.865	305.192	338.023	336.573	374.139	470.462	469.731	422.295	353.456	500.681	681.367	281.305	510.52	546.888	399.942	539.694	484.89	343.846	469.847	528.254	548.742	467.316	285.96	430.838	457.838	629.967	Mitochodria
712	P04046	ADE4	16473.2	15213.9	15893.8	19518.6	20341.1	19972.1	30100.4	30782.7	27948.1	34100.3	37487.3	39337.8	23480.5	34544.4	32056.9	36139.2	38841.8	38022.7	40108.6	43514.2	38757.7	42499.2	42318.8	40433.6	39160.7	31490	48613.1	Nucleotides
713	P08679	CIT2	4549.9	4472.91	4343.78	3313.75	3467.93	3187.25	4643.08	4824.45	4770.35	5121.03	6123.13	6234.68	4160.42	6389.15	7029.21	10321.1	10673.4	12219	15591.6	12991.5	14925.5	7556.19	8116.91	8060.94	6724.41	4468.27	7041.66	AminoAcid
714	P09232	PRB1	51216.3	49827	50805.5	53209.7	51604.7	55558.5	57901.1	66240.1	60423.9	52126.3	50786.9	55385	24102.5	29322.4	29034.5	20235.1	20921.9	20725.1	15448.3	14133.9	16689.6	13775.6	13836.5	12532.9	12633.8	9103.51	14148.6	Stress
715	P10507	MAS1	3236.73	3067.45	3338.15	3519.02	3654.6	3800.65	5834.14	6430.92	5629.63	6826.36	7109.99	7861.36	4557.06	6333.7	6240.31	6835.36	7270.89	7023.94	7584.11	8219.39	7392.97	7394.45	7547.31	7412.08	6859.18	5637.58	7727.71	Mitochodria
716	P11353	HEM13	2893.53	2903.13	3045.67	3366.27	3417.77	3436.43	5309.69	5692.48	5265.82	6997.97	7102.62	7518.08	4429.55	6632.78	5846.91	6923.21	6932.71	7402.55	7264.97	9923.86	7588.16	11114.5	11281.7	10637.6	9393.46	7777.8	9655.67	Other
717	P13185	KIN1	1245.9	1254.16	1389.11	1600.09	1390.25	1066.48	1362.3	1430.85	1242.43	1242.3	1499.1	1391.07	845.023	994.015		997.044	1196.01	1060.16	763.712	1134.44	636.162	703.764	1325.72	712.522	857.776	834.791		ER
718	P13586	PMR1	1492.68	1747.18	1731.65	2126.44	1819.32	1879.49	2206.95	2512.29	2015.58	1818.13	2324.13	2405.4	1210.78	1307.67	1300.28	1223.62	1397.65	1307.49	1340.92	1325.1	1260.76		1303.62	1044.81	1092.95	1082.48		Other
719	P14164	ABF1	3518.01	3516.91	3652.22	3780.64	4292.23	4112.77	5443.54	5424.96	4549.91	6071.98	6314.54	6178.34	3427.33	5404.89	4659.43	2702.27	5555.27	5000.42	4536.56	4734	4895.25	4621.52	4946.66	4382.38	4374.2	3543.5	4576.59	Transcription
720	P16550	APA1	25863.1	27810.5	27738.6	23882.7	24099.6	24415.8	21621.3	23228.6	23468.1	23034.6	24131.2	26044	15178.4	20659.2	19321.8	21277.8	21471.6	21296.1	19047.7	19383.9	19837.2	19130.4	19164.3	19012.8	18087.5	14451.3	23287.8	Nucleotides
721	P16622	HEM15	9019.25	9059.35	9425.51	9009.42	10485.6	10162.6	11373.1	12724.3	12585.2	11687.4	11926.8	14113.9	7368.02	10902.9	11324.9	9050.07	9226.85	9472.36	8025.97	9648.82	12989.1	11499.8	10815.2	9534.38	9641.57	7497.41	10540.4	Mitochodria
722	P17558	PET123	3485.83	3754.46	4084.66	4159.19	5143.46	5992.51	8229.85	7918.21	8053.9	8857.8	10705.3	11135.6	6888.9	9957.09	9971.86	11954.5	11163.4	11235.8	12235.7	13623.8	12714.3	13725.2	14175.3	13303.6	12830	10118.5	14086.7	Mitochodria
723	P21147	OLE1	7857.39	6778.29	7369.92	12230.6	11302.4	12037.4	22414.3	21358.6	19000.5	19398.6	23082.5	23038.4	14197.7	16730.5	18302.7	19201.8	17988.6	19008.8	22713.5	25880.5	24635	23484.7	26299.7	22246.8	18646.4	18953.9	19919.7	lipid metabolism
724	P23180	AIM17	23525.4	22764.1	24195	22201	22757.8	23259.1	22080.6	22796.8	22100	21965.3	23140.4	25547.1	12929.9	16928.1	16814.4	13906.1	13723.4	13480.5	10717.4	9133.24	11019.2	8143.99	8865.07	7782.19	6098.65	4125.88	5712.04	Mitochodria
725	P24279	MCM3		425.214	465.491	611.094	475.336	448.714	976.567	1246.43	854.572	1210.4		1174.88	881.108	1564.06	1305.56	1427.58	1582.78	1612.63	1403.33	1706.61	1641.95	2337.72	1746.45	1417.41	1549.33	1394.58	1476.58	Other
726	P25294	SIS1	112353	119444	112114	101839	102431	109432	78987	80054.9	81621.3	69477.2	72204.5	74914.8	36202.2	45897.2	44303	39470.5	41876.9	41336.6	37378.2	37387	38761.3	33855.4	32280.5	31084.3	29109	23584.1	35788.9	Chaperon
727	P25586	KRR1	2494.25	2538.77	2610.23	2673.33	2860.57	2629.31	3779.55	3888.42	3638.45	4301.67	4897.5	4768.73	2975.55	4335.74	4082.12	4204.82	4658.17	4496.68	4648.71	4428.73	4152.49	4737.53	4445.68	4586.36	4217.78	3702.87	5740.44	Other
728	P25847	MSH2	470.754	466.141	490.062	531.074	486.898	476.985	643.762	633.772	647.648	593.08	540.433	807.173	460.992	545.302	565.014	606.581	773.579	632.267	703.177	717.528	674.632	566.413	637.063	592.119	533.062	522.289	867.1	Stress
729	P26321	RPL5	128020	134116	134220	140537	135834	138037	188807	192896	184526	213032	242725	249079	142508	210294	202998	224545	244475	238073	236336	258024	240944	275892	276466	269457	253100	207331	330856	Tanslation
730	P27466	CMK1	5478.45	5008.54	4701.46	4565.5	4656.69	4862.28	5302.77	5552.17	5348.1	5003.16	5856.7	5789.48	3235.24	4310.94	4386.65	5677.96	5177.93	4916.11	5613	6740.13	6620	9004.19	8806.76	8765.69	8355.89	6433.61	9378.32	Stress
731	P27472	GSY2	8723.92	5831.06	8432.83	8487.96	7987.27	6893.43	6379.82	6562.78	5676.74	4795.49	5305.65	5639.21	2464.16	2545.6	2581.06	1861.55	1602.88	1636.5	1273.11	1461.9	1422.42	1354.42	1091.72	1495.57	1247.23	896.771	3199.62	Other
732	P29509	TRR1	33186.7	32678	34360.5	33798.6	36145.9	33748.8	38665.8	40237.7	37237.9	44080.3	47650.5	46685.2	28211	42822.4	37199.7	42000.6	44798.1	43426.8	41488	44936.4	44249.9	46601.6	45588.3	44707.2	42926.3	34691.2	51348	Nucleotides
733	P32380	SPC110				487.198				623.422	580.63	566.029	755.95			582.843		381.397	376.008			464.111		329.433	369.216			284.994		Other
734	P32451	BIO2	2546.65	3025.36	3269.99	4123.7	4786.85	4713.39	8850.01	9567.06	8600	10783.3	13775	14460.6	9806.31	15977.1	14416.9	19930.4	20600.6	20176.6	22944.2	19567.2	23291.5	19395.8	18859	17687.8	18456.8	15098.9	20782.9	Mitochodria
735	P32496	RPN12	21895.9	21111.5	21121.5	21884.9	19913.6	19555.4	23045.5	22972.7	22454.8	24346.3	22785.5	25966.4	13941.1	19186.4	18405.4	18748.6	17201.5	18406.2	18006.4	16700	17328.8	15406.4	14715.7	16450.1	14224.2	10715.5	18799.8	Other
736	P32643	TMT1	8892.08	8857.89	9247.39	11071.9	11339.1	11800.4	17096.1	19055.4	17108.1	16584	16286.7	16333.3	6054.94	8382.66	7856.64	5270.74	4816.93	4447.99	4116.53	3634.23	3734.66	4421.32	4160.96	3184.4	2866.1	3327.78	3459.83	Other
737	P32835	GSP1	2730.1	2671.86	2695.92	2227.46	2551.5	2668.7	3120.29	3082.89	3293.08	3596.01	3845.37	4155.88	2392.46	3147.95	3403.13	3767.47	4071.25	4255.06	4064.89	4469.27	4211.71	4901.68	4871.12	4769.9		3713.19	5899.7	Nucleotides
738	P32836	GSP2	100033	100324	102051	97983.7	101114	93791.8	106385	101209	107032	103728	107636	112978	67673.7	94539.4	86499.5	89507.9	100079	102508	96751.5	102733	101846	109457	109258	106674	98932.7	80968.3	117507	Other
739	P32909	SMY2	811.573		1413.19		1760.54	2097.51	5213.27		1327.03	1293.03	1676.71	2397.85	1591.58	1812.68	1840.73	2326.09	2479.12		2474.36	2799.64	2328.59	3062.56	2067.32		2056.37	1659.75	2291.36	Other
740	P33299	RPT1	24077.2	23338.8	24348.5	23727.7	22864	23880	25359.7	25629	24876.1	24064.6	24069	28235.2	15823.5	21483.9	21832.4	21539.5	20759.2	20771.5	18601.4	18546.3	18992.5	20264.3	19731.3	20196.3	18849.7	15363.4	22777.3	Other
741	P33302	PDR5	351.167	325.026	533.177	391.692	544.809	645.957	779.332	1018.83	1257.22	785.59	1005.75	1357.31	622.47	1034.73	773.394	970.416	1026.84	1236.22		914.666	977.452	953.011	1153.12	928.501	836.084	870.498	1039.1	Mitochodria
742	P33303	SFC1	48468.2	47577.3	44589.1	57360.3	60354	56208.9	60085	60548.7	59673	64739.1	67509.6	69979.8	43803.5	60957.6	60595.1	57014.7	56759.3	56163	51636.7	48174.5	53015	13574.4	15068.8	9400.62	3935.99	2228.27	2956.75	Mitochodria
743	P33755	NPL4	4663.39	5181.9	4424.14	5073.19	4417.96	4413.79	5743.58	4615.05	4847.24	4386.53	4158.69	4821.27	3079.12	3461.44	3614.73	2777.1	2837.61	3319	3756.06	2470.37	3059.64	2124.02	3067.39	2596.5	2171.02	1833.81	4027.99	ER
744	P36120	DBP7			1203.42	674.748	776.687	621.171	902.904		777.901	1277.17		1166.07			1200.56	1615.48	868.401	945.632	1229	748.168	805.67	1505.71	1053.17	1052.15			1238.05	Other
745	P36520	MRPL10	4920.16	4816.48	5450.7	5603.29	5479.2	5876.86	9952.67	10766.8	9293.02	11167.5	12361.1	12776.3	7642.59	11743.8	11381.8	12818.5	13905.6	13487	13729.6	15716.1	14801.1	16249.9	15592.9	15220.3	14344.6	11463.9	17576	Mitochodria
746	P36525	MRPL24	3254.23	3876.39	3393.68	4244.99	3794.37	3483.44	7353.94	5985.44	6249.14	7080.82	8721.81	7856.47	5029.48	7527.79	7529.91	8635.87	9827.99	8884.83	8810.63	9214.37	8988.36	10996	10982.8	10344.4	8794.26	8064.7	9990.09	Mitochodria
747	P36534	MRPL40	4204.24	4648.03	4381.29	5097.28	5517.1	5285.15	9132.42	9546.69	10070.6	10978.1	11643	11041	7017.3	11544.4	10595	12103.1	12637.2	13341.2	13991	14037.5	13583.5	16713.5	16107.3	16684.2	14891.1	11848.4	17472	Mitochodria
748	P38351	PAF1	2352.55	2535.6	2413.41	2213.3	2555.21	2856.54	2897.82	3162.41	2937.89	3240.74	3335.63	3243.96	2334.67	3199.2	2841.64	3230.8	3009.04	3288.05	2908.21	3079.63	3019.12	3190.93	3137.94	2509.16	2722.47	2175.17	3207.28	Transcription
749	P38623	RCK2	1005.23	1046.23	1071.31	1075.03	987.599	880.211	1431.19	1361.49	1186.41	1127.8	1480.24	1509.38	947.108	1324.06	1068.06	1022.1	1081.52	1124.32	1261.17	1141.48	1149.48	1136.61	1011.89	930.212	941.336	746.538	907.677	Other
750	P38694	MSC7	3287.24	3894.33	3895.71	4041.13	3700.79	4546.32	6881.04	6174.19	5847.63	5882.61	7221.31	6908.45	3685.94	3443.71	5422.57	2674.93	2975.31	3073.75	2648.99	2728.59	2777.08	2474.18	2808.64	2447.68	2612.17	2204.1	2867.92	ER
751	P38817	GGA2	4403.91	4422.26	4590.1	3861.66	4219.83	4572.48	5237.48	6059.75	5091.02	5565.84	6820.2	6994.34	4402.5	5511.59	5557.81	5831.41	5977.12	5984.86	6306.53	6323.66	6058.93	6199.96	6367.55	5912.5	5404.13	4388.36	6538.94	Other
752	P38822	BZZ1	2055.45	2279.12	1957.8	1793.35	1739.97	2031.02	2030.43	1774.41	2744.49	1810.28	1732.94	2341.92	1474.66	1832.59		1948.59	2007.53	1885.86	1664.99	1843.63	1764.64	1872.43	2091.92	1748.96	1667.39	1046.95		Stress
753	P38825	TOM71	3371.07	2857.82	3511.88	3397.06	3098.41	3102.74	4907.51	3935.42	3324.53	4572.63	4288.32	5099.33	2790.68	3669.08	3191.67	3519.9	3747.56	4156.04	3940.94	4048.23	4087.1	4079.93	3775.01	3835.1	3863.82	2921.41	4360.31	Mitochodria
754	P38996	NAB3	6057.31	5608.29	6293.26	6066.71	6620.15	6315.96	7165.7	7188.18	6809.87	6686.49	7719.58	8761.13	4365.78	6043.54	5608.34	5437.46	5408.54	5211.48	5329.52	5553.22	4990.15	5983.07	5786.96	5160.98	4602.61	3746.63	5599.32	Other
755	P40433	PFK26	695.62	128.435	254.078	664.823	164.481	695.05	304.472	131.471	543.904		155.143						133.924											Other
756	P40457	MLP2					59.1023								31.5463		75.7365													Mitochodria
757	P40693	RLP7	5397.77	5636.23	5154.87	5901.89	6263.71	6026.69	9303.96	9867.57	8732.54	11248.8	12110.6	13194.3	8278.6	11606.3	11165.5	11786	13155.3	13293.5	13415.1	13301.4	13662.5	14552.7	14437.9	13786.1	12987.8	10747.9	17677.2	Other
758	P41911	GPD2	18557.8	19022.8	18644.1	16975.3	16013.7	16760.5	16481	16400.2	15838.4	15677.7	16032.9	17319.8	9821.39	12579.2	12945.2	12850.7	12981	12799	11813.1	11737.1	12225	8473.11	10067.7	9340.8	8221.88	5834	10977.6	lipid metabolism
759	P47039	BNA3	23497.7	21302.3	22879.4	22564.5	21962.9	23466.2	24738.1	24953	25613.7	24266.5	26315.8	28650.7	14915.6	20844.3	20739.6	21046.4	20283.2	20661.1	19711.7	19841.5	19878.5	21682.4	21249	20635.4	20634.4	15602.4	26169.4	Mitochodria
760	P47054	NUP192		259.694	185.16		289.272	202.89		173.167		235.547				240.872	164.599		236.774			172.609	184.25	212.317		209.295		231.692		Other
761	P47083	MPP10	1125.51	1066.66	1044.35	1163.59		1302.2	1524.47	1714.96	1372.63	1734.18	2021.03	1858.23	1245.97	1773.29	1928.65	2139.19	2143.97	1907.39	2058.35	2304.5	2086.65	2173.7	2141.95	2090.95	1780.44	1754.79	2424.14	Other
762	P47120	LIA1	14668.5	16054.6	14657	16264.8	18673.2	17578.9	25609	24433.8	22722.4	28971.5	31861.2	35471	21745.5	29362.5	26234.2	32394.6	34479.9	33090.8	34268.6	35922.3	34397.2	40016.9	37973.1	37376.4	36928.8	30703.9	46037.6	Other
763	P47137	YJR096W	10468.2	10419	12050.1	11797.4	10187.8	12674.3	8167.03	6887.73	9228.51	5254.66	3478.55	5998.17	1769.03	1681.4	1659.19	712.251		810.739	771.064	745.385	1260.47		632.134	1282.46	506.248		839.376	Stress
764	P48527	MSY1	1372.95	1280.25	1262.51	1182.69	1371.54	1281.54	2403.97	2754.77	2661.64	2892.04	2917.47	3757.14	1899.2	2871.8	3022.17	3473.65	3241.4	3602.86	4357.31	4126.73	4397.26	5723.75	4172.11	4408.13	3645.19	3122.5	9381.73	Mitochodria
765	P50086	NAS6	10070.4	9825.4	9419.28	9273.64	9615.92	9969.84	11653.5	11658.2	11025.3	11997.2	12270.1	13142.4	7728.96	10836.3	9997.88	10550.5	10617.7	10449.6	9978.25	10205.8	10248.3	9757.74	9365.4	9131.39	8076.1	6781.36	9561.84	Other
766	P50109	PSP2	3102.29	3391.34	3602.43	3388.61	3782.42	3844.11	4521.71	4972.43	4444.83	4846.81	5195.52	4686.91	2995.16	4196.49	3977.44	3580.74	4259.76	3707.45	3720.94	3622.1	3533.19	3711.38	3233.18	3464.23	2896	2416.93	3407.13	Other
767	P51401	RPL9B	6637.44	7119.44	7027.96	8041.82	8609.43	8731.56	9157.72	9779.94	9224.89	9799.85	12048.9	13128.7	7315.99	10682	10086.5	10890.2	11364.1	11353.9	11287.6	11962.3	11734.3	12741.8	12493.1	12162.9	11402.8	9354.92	14262.4	Tanslation
768	P52593	NUP188	222.821	286.304	307.66	372.156	314.354	255.335	252.981	396.185	252.701	403.044		592.404	209.027	252.612		272.223	321.036	264.817	290.67	305.001	269.959	308.967	342.816	272.944	348.391	239.095	274.427	Other
769	P53064	RTF1	1889.82	2191.3	2414.75	2325.83	2385.83	2240.59	2987.15	3179.4	3017.01	3041.52	2964.13	3961.34	2250.48	3254.24	3187.92	2984.13	3206.31	3158.05	2671.13	3149.66	3216.01	2610.33	2962.55	2601.23	2325.76	1968.07	2066.61	Transcription
770	P53145	LSG1	2625.73	2786.16	2983.47	2933.23	3027.43	2695.67	3486.84	3321.81	3397.55	3838.32	4749.78	4477.97	2589.78	3967.18	2960.56	4129.49	3998.51	4450.3	4148.94	3658.37	3664.81	4505.97	3921.32	3830.08	3935.06	3226.41	4548.89	Other
771	P53199	ERG26	10803.3	9359.19	10427.6	13954.7	14278.1	13945.6	25466.5	24369.4	23308.5	27971.6	27745.9	31725.3	17441.5	22351.3	22202.1	19676.9	19234.1	19164.6	17766.9	17873.5	17540.6	19174.3	16395.8	16384.5	14598.1	12343.3	17544.4	lipid metabolism
772	P53295	RBG2	5132.76	5214.73	5185.25	4422.58	4924.86	5382.71	5478.25	6264.15	5390.57	6162.94	6702.29	6628.66	3819.52	6472.84	5407.04	6156.71	6583.72	6708.3	5782.56	6763.76	6138.03	6738.65	5926.81	6355.44	5965.87	4632.34	7078.41	Other
773	P53549	RPT4	46862.7	47287.1	48224	46794.1	45388.9	46110.3	48233.4	48094.4	47203.2	47635.9	52779.5	54937.1	29813.8	42070.9	38327	38151.6	41290.5	37574.8	36087.8	37345	37917.7	37126.9	38041.9	36653.2	33077.2	27230.8	42430.5	Other
774	P53839	GOR1	70186.2	66873.8	72270.1	62996.8	56488.7	64279.8	43398.7	41271.5	42207.2	36507	35286.2	38289.4	18577.8	23998.8	24792	21121.7	20617.6	19328.8	17550.5	16318.5	17502.8	11728.7	12755.3	10543.1	9896.12	7371.6	10734.5	Mitochodria
775	P54730	UBX4	3160.54	2868.89	3073.75	3003.58	2748.86	2867.48	3337.59	3982.84	2777.96	3066.47	3264.85	3685.24	1926.38	2645.79	2214.05	2689.26	2590.56	2679.63	2828.82	3063.78	2490.14	3037.57	2745.67	2359.23	3238.5	1853.36	2948.91	Other
776	Q00816	REG1	2733.28	2802.01	2869.42	2736.99	2685.43	2479.03	3080.74	2814.84	2840.37	2726.66	3203.71	2905.56	1666.94	2500.1	2444.48	2325.24	2303.14	2226.56	2120.15	2258.56	2141.93	2356.33	2323.94	2285.06	2205.53	1571.63	2343.74	Other
777	Q01454	CTF4	1147.05	899.234	1006.71	712.949	908.028	768.351	1162.98	1303.4	971.446	706.475	1517.15		552.303	814.449	1045.16	938.027	1046.43	797.424	656.735	977.167	865.782	931.856	919.413	808.376	514.929	710.013		Stress
778	Q02201	OSH6	2726.32	2809.65	3061.3	2955.52	3109.95	2878.28	3530.24	4100.86	3652.73	3144.81	2241.69	3496.98	1940.27	2630.08	2309	2410.43	2325.47	2502.69	2161.46	2438.3	2680.9	2933.82	2234.99	2786.3	2239.04	1660.09	2965.82	ER
779	Q03088	SVL3	2741.87	2707.96	2835.92	3341.38	3325.83	3415.81	3999.16	4604.38	3969.98	3933.47	4864.72	3970.63	2638.06	3383.17	2471.07	2758.58	2677.05	3704.83	3194.97	3795.22	3860.36	4445.98	4214.86	3330.33	4181.61	3066.51	4593.43	Other
780	Q03102	YML131W	54574.8	54027.8	55920.3	60256	51978.8	58327.7	30588.6	31011.5	30106.3	21949.6	25141.7	25963.2	11355.4	12833.7	13902.9	8381.63	8509.45	8005.75	5062.29	3417.18	5022.67	2848.03	3219.43	3291.24	3069.39	2876.52	4316.75	Other
781	Q04409	EMI2	13279	11952.5	13259.4	9272.16	8691.94	9797.82	7179.74	6398.61	6542.96	6850.59	6771.7	8075.73	3985.74	5611.4	5324.73	6023.01	6265.13	6064.75	5912.74	5860.57	5739.3	6537.71	6135.19	6006.91	5701.26	4505.68	6483.91	Other
782	Q04636	POB3	6634.78	6655.58	6549.15	6740.67	6234.87	6867.48	8223.15	8334.03	7894.98	8416.67	9000.29	9117.9	5111.2	7372.21	7762.81	6922.59	7009.53	6664.2	6208.82	6574.04	6047.08	6472.7	6432.82	6236.75	5703.23	4838.16	6056.51	Transcription
783	Q05931	SSQ1	2911.01	2958.09	3180.06	2676.07	2484.38	2367.41	2636.32	2927.25	3124.64	2835.02	2920.2	3157.94	1726.47	2468.5	3202.23	2377.8	2756.72	2295.38	2436.86	2594.9	2704.3	1039.62	2214.54	2060.05	2154.33	1615.75	2832.8	Chaperon
784	Q06053	DUS3	1466.38		1888.6	1831.16	1842.72		3106.14	2247.48		2853.84	2459.47	3357.21	1583.7	2027.92		2134.51	2698.42	2127.91	2913.65	2740.62	2624.67	2987.38	2823.17		2440.7	2370.38	3443.45	Other
785	Q07807	PUF3	1468.46	1297.39	1413.42	1356.96	1065.71	1286.95	1980.44	1980.71	2823.99	2377.79	2389.35	2631.23	2180.7	2573.03	2922.09	3246.39	3130.16	4022.6	3641.09	3552.12	4185.57	4260.94	3550.92	3892.93	3501.47	2627.07	3883.95	Other
786	Q08773	ISW2		148.3		143.085			180.491	161.591	158.992	188.505	278.249			175.397		167.703	162.914		178.81	202.789	363.726	282.781	340.586		275.732		215.063	Transcription
787	Q12154	GET3	25622.8	25911	25977.2	21796.3	23717.9	22922.7	24453.2	27292.6	25485.6	25960.5	29234.4	30181.8	18048.4	22651.5	23480.3	22974.7	23653.1	23470.9	22473.2	22841.8	21536.3	24411.6	24485.7	24144.1	22603.9	18225.8	27864.8	Stress
788	Q12246	LCB4	588.872	572.32		729.228	617.408	2601.13	912.481	935.338	880.359	1047.59	1246.31	1228.47	742.962	1148.41	1300.25	1108.13	1168.52	1343.13	1306.64	1347.47	1252.19	1397.08	1449.41	1481.52	1452.98	1178.31	1875.63	lipid metabolism
789	Q12406	ARP7	3656.01	3844.96	3348.02	3391.84	3307.53	3210.49	4759.08	5015.92	3966.08	5018.74	5511.97	5632.11	3148.73	5672.15	4551.42	4656.72	5650.17	4535.18	4640.26	5503.92	4662.19	5769.18	5126.34	5058.44	5066.64	3859.78	5614.95	Transcription
790	Q12480	AIM45	12432	12941.4	12997.7	13789	13712.7	12462.1	17869.3	18864.4	17821.4	19230.3	21327.9	22502.3	13164.5	19296.9	18627.1	20439.9	20720.4	20751.1	20378.8	22003.9	19931.2	21198.9	21175.1	19047.1	18257.1	14747.1	19885.7	Mitochodria
791	Q99383	HRP1	11446.9	12451.1	12626	12173.4	12767.8	11899.2	15348.8	15799.7	14862.4	16056.8	17478.9	17794.8	9766.08	14825	13833.1	14149.9	14393	13428.7	13819.2	15535.4	13535.1	15874.7	15881.4	15425.1	14573.4	12068.8	17800.9	Other
792	P00498	HIS1	24895.5	22314	22994.3	35796.1	32165.1	33232	55842.1	51869.8	48836.3	56104.9	51318.7	61925.9	31804.3	37047.4	41905.4	36682.3	34000.3	38870.7	38715.5	35563	36305.3	47516	39970	46425.6	44083.7	32500.6	64482.2	AminoAcid
793	P00546	CDC28	7750.44	7273.82	7391.58	6846.06	6864.91	7312.1	8459.82	7774.3	8178.91	8101.63	8949.99	8648.6	5201.16	7759.22	7468.96	7633.71	7372.86	6505.05	6160.12	6208.09	6686.68	6752.44	6161.49	5594.35	5388.66	5424.91	7232.38	ER
794	P00942	TPI1	575428	588142	573531	537492	557445	568445	503660	490061	498151	478161	487094	539834	280603	390382	371312	380984	401285	403997	422001	472670	432567	478293	471834	450608	422972	332354	509499	AminoAcid
795	P02406	RPL28	113518	126989	112180	131495	136509	124143	154234	172707	175312	170336	191390	222281	127649	186668	178405	197013	197188	204423	192279	216207	207968	229829	228864	223434	209793	174053	263245	Tanslation
796	P03962	URA3	5625.91	4943.45	5981.62	5366.8	6577.38	6142.84	7213.49	7444.38	7202.17	7846.96	8763.95	8609.31	5674.21	7708.97	8733.12	8061.47	7665.11	7708.43	7732.2	8251.13	7634.99	8795.64	8769.28	7942.76	7871.65	6201.23	8636.61	Nucleotides
797	P05738	RPL9A	83811.9	83035.4	90145.6	96894.7	107294	106925	162475	171868	173078	206670	215361	235496	137273	213382	197956	227118	233924	241924	258415	286292	258278	331290	321898	314416	302438	261376	404639	Tanslation
798	P05743	RPL26A	578621	417234	396329	419231	583749	451851	550239	650903	550502	615226	607559	735988	385359	613664	534039	596977	610781	573522	609516	626549	590762	646316	642120	626244	639370	465640	715491	Tanslation
799	P07267	PEP4	47291.8	49339.6	51174.8	50024.4	48309.1	50460	55965.1	58139.6	58363.4	50569.2	43608.8	58359.7	24217.9	31953.9	30972.4	25802.4	30240.8	26143.7	20947.8	19475.4	21866.5	16673.4	18299.7	15959.3	15129.9	11717.1	15996.1	Stress
800	P07285	TRP4	4463.13	4768.28	4333.28	4262.92	4467.86	4604.19	8181.55	7002.96	7970.17	7112.17	6440.55	7765.81	4471.69	5383.38		4748.8	3805.89	5712.38	3639.22	4122.61	4106.06	4020.05	3082.35	5734.8	3024.62	2642.86	7704.23	AminoAcid
801	P08539	GPA1	1215.16	2179.49	1351.34	2626.48	1979.71	1111.3	1907.77	2381.06	2092.26	2311.94	2422.6	2336.88	1503.28	2098.55		2022.38	1854.45	2450.84	2162.29	2029.3	2211.27	1909.28	1809.87	1998.65	1715.31	1064.4	1847.12	Other
802	P09950	HEM1	835.395	711.922	888.492	974.698	1057.51	991.943	2111.11	2282.37	1862.68	2489.35	2892.64	2960.49	2198.25	3548.27	3244.32	4537.8	4495.54	4581.67	4903.09	4876.12	4644.72	5560.5	5175.38	5196.1	4862.06	3732.55	5714.22	Mitochodria
803	P0CX50:P0CX49	RPL18B	99346.7	98193.3	104987	103167	109254	109754	140158	145111	134152	156551	171396	184765	100731	151194	149538	168822	172849	178304	174907	189342	183175	203862	202029	200616	191006	155794	242895	Tanslation
804	P10363	PRI1	1142.74	1123.6	1030.3	973.041	1046.94	1054.2	1323.13	1895.85	1434.62	1662.3	1787.32	1635	1074.08	1441.26			1962.93	1491.56		1113.66	1330.38	1029.79		1156.02	1291.32	830.3	1284.94	Other
805	P11433	CDC24												689.879															380.992	Stress
806	P11745	RNA1	11279.6	11708.6	10825.5	12221.4	11492.3	11786	15808.3	16924.5	15704.9	16987.7	19048.1	16530	11520.3	15256.8	14658.5	14940	14327.5	16065	14924	13247.4	14509.8	12725.5	13582.4	12868.4	12659.2	9935.23	13353.4	Other
807	P12754	GCD2	4541.04	4440.84	4375.47	4601.73	4323.39	4262.51	5142.51	5224.87	5237.54	5096.28	5130.57	6536.27	3546.03	4429.69	4371.49	4551.29	4312.45	4827.76	4751.26	4593.76	4777.88	4630.2	4833.21	4769.24	4730.92	4234.55	6074.89	Tanslation
808	P14832	CPR1	780012	835804	877061	825425	799545	849568	710128	723805	689801	618134	642189	681862	300265	386207	356241	320751	322939	313347	310322	350006	320009	371810	363636	354526	332565	265368	386855	Other
809	P14843	ARO3	23447.9	23583.3	23904.8	28127	29096.1	29841	35739.9	38057.5	37489.1	34756	34589.2	38390.3	16747.8	22234.9	21049.7	16207.6	17049.8	16547.9	14660.1	14811.7	16092.4	17442.4	17636.4	16942.4	15977.3	13341.7	20932.9	AminoAcid
810	P15565-2:P15565	TRM1	3164.15	2820.74	3391.72	3515.12	3493.54	3361.98	4491.71	4801.22	4314.09	4946.68	5329.53	5840.25	3556.65	5373.1	5422.31	5618.96	5458.86	6100.14	6069.62	5694.5	6214.65	5736.98	6005.31	5648.67	5370.83	4872.82	6913.43	Mitochodria
811	P17442	PHO81	161.597	536.63	397.781		216.201		134.103			310.262	339.425			226.406						247.672	202.454		288.785		173.782	159.686		Other
812	P18408	MET16	2771.79	1937.78		2584.76	1946.07	2642.66	4368.24	4643.5	3687.05	5320.42	5375	4547.91	3992.5	6004.88	4580.76	6726.76	6057.31	6655.98	7708.99	7629.95	7414.04	10002.7	8969.68	8788.81	9700.7	6135.42	12587.3	Other
813	P18961	YPK2	255	374.119	336.103	457.497	397.285	383.564	512.35	415.561	393.965	428.844	634.206		320.287	411.886		367.179	561.668	470.947	394.075	416.181	470.47		377.92	344.222	380.079	233.356		Translation
814	P21827	SRM1	8061.92	7887.74	8170.75	8209.68	8863.54	8198.82	10708.9	11380	10744.6	11834.4	13437.2	13744.1	7751.4	11712.3	11478.6	12381	13148.6	12292.3	12608.8	12561.3	12292.1	13087.2	13040.6	13511.8	11706.9	9584.68	13000.4	Other
815	P23201	SPA2	294.429	480.176	816.566	736.069	526.685	1279.74	860.127	2137.03	1701.06	1293.44	809.093	2774		1996.48	1506.87	3359.1	1191.79		1353.48	1240.5	2660.38	2639.67	1384.33		1024.68	1237.6		Other
816	P23641	MIR1	79857.3	80780.5	73355.1	104314	102138	94667.1	181844	143962	125066	179500	153964	156836	125064	125586	114074	94583.8	124563	146241	177324	111705	125335	97074.7	121097	97731.6	104966	77771.9	127191	Mitochodria
817	P25339	PUF4		1108.15			1323.97	1433.35	1651.82	1162.76	1548.09	1514.36	1672.15		877.383	1052.32	1726.42	1615.16	1230.84		1687.47	1301.76	1476.21				1615.49			Transcription
818	P25349	YCP4	78092.7	72696.7	72999.4	67780.4	65729.2	61889.7	69598.1	68486.2	65086.2	75780.1	76377.8	83237	48040.7	62580.4	59110	62033.2	61359	63320.7	51963.3	41762.3	47783.7	36006.3	34734.8	32995.1	27770.4	20756.7	32287.2	Mitochodria
819	P25382	RSA4	1201.17	1258.23		1601.74	1401.65	1212.37	1277.53	1686.89	1444.74	1599.1	1728.65	2074.14	1138.48	1568.44	3371.5	1913.14	1703.65		1607.42	1795.88	2236.94	2061.74	1853.17	1732.3	2002.08	1420.14	2728.86	Other
820	P25443	RPS2	223305	213496	229155	243069	226112	232222	295896	317746	307040	345982	367513	389558	226765	335870	312147	370004	362931	365456	387258	431884	387391	469485	459154	454020	432694	350767	534859	Tanslation
821	P25574	EMC1	2008.56	1929.7	1842.48	2158.75	2127.97	1832.85	2266.88	2280.05	2043.98	1180.34	2528.76	2456.47	1183.25	1519	1719.55	1438.93	1408.64	1425.59	1471.55	1496.19	1484.4	1192.34	1345.43	1110.56	1072.98	1062.95	898.48	ER
822	P28789	HEM3	3784.45	4396.44	4133.06	3933.71	4472.83	4297.63	5750.84	5925.6	5400.65	6398.59	6487.99	7160.11	5017.23	8069.94	7779.66	8487.21	8550.27	9111.21	9641.42	10939.9	9818	10071.8	10235.7	9280.08	8707.49	6715.04	8852.3	Other
823	P29468	PAP1	1181.11	1573.83	1044.94	1386.66	1345.29	1055.94	1433.27	2505.53	1395.62	1473.74	1992.48		936.206	1567.6		1635.34	1725.5	1504.75	1346.51	1274.07	1424.48	1294.52	1392.16	1314.55	1426.79	1313.86	1316.7	Other
824	P32317	AFG1	2681.99	2764.99	2490.47	2932.33	3057.6	2939.5	3570.9	3712.83	3545.66	3800.66	4355.82	4367.54	2753.81	3325.05	3594.16	4271.16	3642.48	4023.8	4187.82	4171.28	4045.55	3870.36	4030.23	4014.56	3532.39	2783.67	4023.65	Mitochodria
825	P32337	PSE1	1835.1	2115.22	2349.29	16794.1	2274.47	2387.89	2996.16	2915.93	2417.91	2620.46	2549.05	2492.45	1841.36	2161.2	2565.47		1959.72	2147.85	2423.32	2526.29	3276.31	3432.13	3581.07	3066.81	2722.57	2596.83	4526.44	Other
826	P32377	MVD1	30353.3	29298.8	30754.4	33729.8	32878.4	34129.7	45540.5	45369.3	43528.1	47459.6	53375.7	57113.2	32836.1	45311.5	44103.9	41568.2	42475.8	43734	41374.7	45805.3	45057.1	45151.5	46458.6	42590	39572.1	31197	45971.1	Other
827	P32476	ERG1	11478.5	8685.67	11223.9	38116.9	39657.7	35106.9	98515.7	94377	90175.3	84832.8	91729	105269	38521.6	39077.8	41263.3	18507.6	16336.5	15120.5	7720.07	8878.81	8621.31	10903.1	10113.1	9836.46	9090.9	8154.82	10857.9	lipid metabolism
828	P32477	GSH1	2374.58	2582.12	2410.49	3394.54	3029.63	3739.24	4249.83	4301.24	3713.27	4097.74	4827.25	4818.22	2627.6	2941.4	4046.1	2950.19	2945.45	3642.95	3658.65	3643.62	3606.36	4973.85	5267.41	5621.81	5242.88	4619.02	7967.83	Other
829	P32591	SWI3	351.219	363.675	411.596	469.984	472.87	476.731	659.968	719.156	643.991	706.958	726.571	804.191	479.699	702.274	604.845	592.109	706	685.851	639.74	658.734	675.16	632.525	641.792	672.832	692.605	468.584	544.165	Transcription
830	P32602	SEC17	11079.3	11481.5	11891.3	10025.2	10956.1	11570.4	12344.8	12308.4	12272.1	12684.1	13974.4	14498.2	8383.02	12228.6	11573	11072.6	11451.2	10799	10590.6	9963.66	10916	10030.8	10048.6	9380.5	8600.74	6170.08	9502.05	Other
831	P32660	DNF1	358.802	448.428	498.959	412.274	526.491		466.235	497.14	456.158	523.239	509.922	603.605	296.651	499.686	93.6036	416.049	350.619	88.0335	484.525	507.427	569.73		459.95	91.12	405.501	328.557	426.983	ER
832	P32771	SFA1	19208.7	19057.9	21009.3	16370.4	15881.4	16488.6	11537.8	11979.5	12102.4	10861.9	10985.6	11895.4	6265.56	8587.31	8587.47	7238.55	7758.23	7513.18	7190.55	7174.33	7427.21	8444.1	8195.99	8335.24	8093.08	6496.66	11004.1	lipid metabolism
833	P33307	CSE1	530.294	535.055	510.177	534.509	519.819	670.428	759.221	652.659	655.926	553.245	868.463	948.772	438.149	567.225	599.436	645.031	602.721	565.447	574.385	670.827	497.52	620.92	708.581	641.131	670.169	633.675	711.572	Other
834	P33399	LHP1	8642.05	9292.72	8846.04	7726.29	8885.01	8474.66	9653.57	10161.9	11271.8	10413.5	12217.6	13240	6964.87	10927.4	9525.58	10666.5	11637.2	11059.8	11103.1	11801.9	11279.6	11372.1	11454.7	10443.7	11047	8845.52	13727.2	Other
835	P33753	TRM2	1066.82	1018.84	1165.67	1742.73	1305.46	1344.73	1304.33	1436.09	1440.31	1481.15	1386.03	1855.59	814.494	1152.81		1622.21	1645.93	1421.3	1651.59	1152.23	1340.32		1176.05	949.898	947.837	1109.19	1797.6	Other
836	P36047	SDS22	16491.4	16080.7	16560.8	14190.5	13574.6	14654	12634.9	12846.7	12459.7	11561.6	14211.5	9753.49	6718.01	9321.48	9606.33	8147.17	8659.78	8184.75	7483.23	7397.52	7792.04	6618.73	6438.28	6240.1	5584.49	4637.85	6081.78	Other
837	P36059	YKL151C	13098.6	11654.5	13522.4	11358.8	9828.12	11180.4	8737.87	8952.15	9319.85	7153.11	6940.02	7214.28	2768.39	3065.91	2888.09	1878	2093.07	1866.98	1624.87	2140.42	1715.31	1662.76	2296.92	1438.58	1542.78	1309.83	1798.33	Energy
838	P36105	RPL14A	21834	23136	22503	24021.4	24978	25138.7	33684	35585.3	32888.9	38055.9	42517.3	46997.6	25215.3	39314.5	37057.8	41781.4	42693.1	42731.7	44257.7	46651.8	43111.5	51479.1	49893	48724.8	46645.9	38389.8	57967.7	Tanslation
839	P36156	ECM4	17223.8	17453.4	18700.3	18941	16535.1	18209	12145.5	13030.2	13546.6	9963.76	9104.81	9670.66	4404.9	5410.98	5117.77	3838.14	4283.54	3811.27	3046.95	2477.78	3428.97	2083.82	2077.07	1822.67	1497.08	1179.4	1836.37	Other
840	P38074	HMT1	9696.94	9732.04	9092.7	10003.5	9655.38	9994.84	13086.7	12750.2	11491.6	13331.1	13556	16067.6	10164.3	14098.1	13390.6	16081.6	13268.2	16894.4	17153.2	16568	18906.5	15470.5	15321.5	16104.1	13478.2	11431.3	17157.5	Other
841	P38077	ATP3	70837.3	66805.8	70407	79567.8	87336.8	83570.4	106359	112467	109717	121851	131014	139493	79822.3	122635	112803	120036	128455	127071	122064	131661	125321	120680	121665	114698	102431	78701	108281	Mitochodria
842	P38112	MAK5	2109.78	1607.52	1964.63	1918.55	2108.92	2072.1	2308.99	2811.04	2582.45	2887.17	3032.2	2935.71	1869.96	2960.91	2604.31	2565.6	3081.81	3086.71	3006.89	3197.53	2924.04	3191.44	3194.85	2749.07	2754.18	2273.43	3204.74	Other
843	P38115	ARA1	74745.8	74915.9	70458.6	76207.3	72954.3	71136	75360.8	71282.7	75229.5	69272.4	74416.4	73919.4	39954.1	56152.1	50057.5	45938.3	49747.8	43620.5	37835.3	33175	36834.7	26020.4	27634.7	25494.8	21402.4	12815.8	20987.9	Other
844	P38235	YBR053C	2476.63	2360.71	2342.99	2421.96	2404.47	2191.16	1778.42	2257.76	2309.76	1714.6	1893.76	1961.16	1027.55	1204.75	1214.14	1037.26	760.767	979.772	858.487	824.288	949.148	686.737		700.973				Other
845	P38741	RIM4	6904.99	6920.89	6925.79	7363.18	7329.94	7227.71	7941	8658.46	7996.33	8216.55	9035.46	10193.5	5538.77	7346.84	7146.84	7249.27	6867.04	6887	6573.71	5789.14	6316.15	4897.34	5152.65	4606.95	3849.04	3031.25	3987.78	Other
846	P38754	RPL14B	397836	381368	429180	383517	411097	413494	443686	447233	450007	482774	502903	551685	333564	484259	470063	484394	540274	533815	512001	576065	546230	666389	622139	627612	596916	490154	778669	Tanslation
847	P38777	FSH1	2057.97	1904.81	2199.28	2059.46	2106.44	2197.24	2814.98	2856.27	2639.38	3439.99	3360.05	3577.49	2524.4	3414.38	3195.6	3792.64	3839.9	4277.72	5588.64	7367.9	5927.46	13626.9	13187.4	14314.9	15436.7	12631.4	22740.9	Other
848	P38787	PAN5	2804.71	2194.69	2408.69	3077.89	3304.57	2861.47	6600.65	4698.08	4286.79	7661.14	6413.6	7613.15	6223.34	5993.4	5878.7	4664.46	5663.75	8039.29	8161.17	5678.2	5664.82	5761.17	6276.69	5410.6	5960.8	4846.67	8235.76	Other
849	P38840	ARO9	5264.87	4390.1	5535.9	5954.34	5956.98	6246.08	14578.9	13825.4	13238.3	14121.5	15194.3	17276.4	10069.6	14102.9	13601.6	13017.2	13763.9	13162.6	7273.04	2988.2	7104.08	1107.48	1307.92	864.093	1042.87	413.997		AminoAcid
850	P38988	GGC1	17099	14376.6	15818.6	20647.4	20570.7	20597.1	36291	34791.5	32968.9	39496.6	36322.2	43072	25008.8	30527.8	32528.9	32393.5	30469.1	33852.5	36012.6	36229.5	33873.8	37084.2	31933.1	33934.2	30267.6	20868.2	39393.3	Mitochodria
851	P39106	MNN1		157.646			264.838		645.013	691.015	521.349	562.126	698.799	717.938	310.457	296.8		411.359		298.994	478.145	818.75	455.076	1303.81	1037.95	1170.82	1113.77	1231.84	1637.37	Other
852	P39109	YCF1	395.956	313.328	255.003	356.196	335.177	323.087	409.96	336.739	287.949	271.523	360.449	344.946	233.361	247.28		259.589		234.527	239.945	308.825	272.603		363.844	270.045	290.632	200.681		Other
853	P39743	RVS167	9765.47	9754.39	9503.07	9633.13	9677.62	9323.21	10692.2	10136.6	10662.7	9283.96	11068.7	12055.3	6359.7	7960.71	9011.32	8142.9	7788.46	8328.08	7686.41	7432.43	8292.81	8274.5	7982.91	7729.36	7869.11	5352.8	8700.1	Other
854	P40054	SER3	9570.44	9143.99	10705.5	13380.6	13426.2	14269.2	19444.1	19310.1	17319.8	19297.1	21813.4	24550.5	13789.8	19044.2	18045.1	19435.1	19248.3	20461.8	21235.5	19360	22059	17988.9	18414.1	17416.2	15605.1	12896.5	18638.4	AminoAcid
855	P40075	SCS2	16608.6	17359.6	16787.9	18027.9	16112.6	15842.8	18489.5	18824.8	17596.6	16337.6	21714.7	22044.1	11119.3	14887.6	15246.4	13583.1	16344.7	14169.3	13294.8	15563.5	13832.9	14162.8	15447.3	13648.7	12212.7	11680.3	15356.6	ER
856	P40517	YRB2	3153.7	3249.24	3355.75	2773.85	2767.13	3459.93	3096.67	3213.75	2849.01	2999.1	2926.4	3176.86	1756.61	2549.79	2464.91	2405.67	2629.86	2618.03	2412.95	2123.56	2352.05	1948.73	2005.59	1678.87	1864.31	1386.64	2068.93	Other
857	P40961	PHB1	37399.5	35766.4	38631.1	36004.1	35906.6	37331.5	41401.8	40969.3	38998.9	43114.3	44046.3	49379.7	28450.9	42219.2	39417.3	42805.7	44041.3	43446.3	48142.1	53386.5	48913.3	51569.3	49773	48600.9	41063.7	32268.4	46112.8	Mitochodria
858	P43588	RPN11	32022.1	32525.8	33032.1	31883.5	31981.4	32409.9	33448.4	35547.2	32750.3	35105	37143.6	37604.5	20907.2	30188.6	28616.1	28068.5	28736.1	27564.5	27589.3	27070.3	27282	27240.2	25972.5	25036.2	24059.7	19208.4	28564.5	Other
859	P43590	YFR006W	4590.23	8113.15	8800.32	5086.86	5965.94	7596.46	6320.98	7112.03	7189.48	6548.92	6361.37	7408.72	3451.85	5287.42	5657.27	4714.62	5112.95	4998.97	4373.06	4505.06	4570.53	4087.82	4453.28	4306.99	4296.03	3023.01	4781.36	Other
860	P43621	RET2	15535.2	13807.7	14764.9	15817.6	16129.2	17740.6	20815.6	20167.9	19718.5	21777.3	22822.2	25648.7	13506.5	19872	19369.4	17728.8	17943.5	19033	19323.6	17876.8	17750.4	18334.8	17380.6	18441	16808.8	12909.8	20937.6	Other
861	P45818	ROK1	1744.71	1642.37	2003.54	1712.5	1901.97	1365.04	2941.81	3295.94	2676.73	3405.36	4308.24	4246.04	2556.69	4273.48	3435.23	4606.61	4942.15	4100.07	5092.95	5205.69	4397.42	5448.58	4981.24	4709.14	5196.69	3974.1	6001.77	Other
862	P46675	STU2	461.748	375.314		355.919	323.409		449.495	448.381	863.041	501.123	245.825	572.469	296.353	541.538	211.941	542.48	358.642	502.306	395.559	520.163	408.68	503.11	501.37			287.811	346.371	Other
863	P47127	AIM24	6567.68	6585.57	6658.6	6966.74	6629.57	6812.27	8488.45	8976.16	7988.23	9358.62	11104.9	10226.3	6018.95	7996.46	9176.73	10486	10465.8	10619.9	10142.1	11350.8	11185.7	10652.2	9855.64	10246.9	9157.67	6680.83	9331.59	Mitochodria
864	P47143	ADO1	55780.3	54171	56376.1	68882.7	68279.6	71153.9	108399	111844	101455	120684	131801	137938	82871.6	122795	116271	127815	134393	130827	136544	145045	140032	142881	141728	133245	121497	97887.1	141991	Nucleotides
865	P48567	PUS4	1343.5	1306.46	1493.8	1394.1	1379.8	1259.22	1534.12	1466.66	1542.43	1704.25	1874.6	2039.81	1153.01	1831.23	1654.15	1698.48	1670.96	1704.95	1630.81	1638.22	1801.02	1725.35	1585.76	1537.96	1523.49	1164.61	1857.65	Mitochodria
866	P48837	NUP57	5160.13	5334.89	5624.69	5814.75	5978.18	5657.14	6989.16	7470.98	6631.8	7098.05	8288.48	7785.23	4489.78	6676.36	5963.32	6195.74	6458.28	6161.89	5690.2	6110.44	5992.77	5901.8	5947.39	6001.37	5449.1	4355.38	6276.91	Other
867	P50107	GLO1	25259.1	29586.6	25632.7	27159	23969	27944	18467.2	17782.3	18185.8	12481.1	12186.9	13867.7	4360.67	5337.31	5386.41	3853.89	3976.28	3842.51	4204.04	4902.71	4935.66	4421.07	4778.29	4190.21	4041.91	3154.53	5733.99	Other
868	P52917	VPS4	2249.5	2026.56	1757.94	2193.07	1963.89	2353.59	2895.8	2856	2751.09	2550.37	2474.94	3365.53	1778.44	2588.28		2636.21	2715.31	3284.45	2476.04	3018.16	2901.78	2963.02	2067.41	2873.04	2728.64	1865.68	3543.62	ER
869	P53043	PPT1	2585.14	2399.04	2450.36	2367.75	2492.96	2924.34	3275.83	3444.98	3244.49	3644.54	3946.08	4738.55	2224.98	3904.76	3744.1	3715.62	4231.19	4033.12	4183.42	3945.04	4541.3	4220.83	4180.62	4481.8	3612.46	3217.77	4511.66	Other
870	P53115	INO80					248.024		573.283	479.432			782.475						489.876						584.569			495.24		Transcription
871	P53128	MET13	3147.43	3160.38	3193.76	4053.04	4143.87	4046.84	6520.21	6574.03	6031.71	7224.49	8959.9	9242.08	5887.72	8865.45	8985.42	10293.5	11233.1	11636	10852.2	10332	11323.1	13563.1	10823.2	11794.7	10663.5	9166.68	15151.9	Mitochodria
872	P53166	MRH4	293.823			477.739			859.765		850.216									834.507		1104.47	825.39			842.782	962.458			Mitochodria
873	P53221	RPL26B	1109.34	1129.46	1211.29	1307.29	1216.68	1275.54	1610.83	1723.53	1676.5	1919.29	2078.23	2176.81	1245.84	1996.47	1856.41	2098.82	2142.53	2113.35	2177.89	2306.45	2157.44	2496.98	2434.8	2353.78	2228.63	1855.75	2805.5	Tanslation
874	P53252	PIL1	314504	332394	328208	337676	319279	315157	299640	317971	326842	296943	299856	297521	143136	202118	200912	162939	164096	163919	135760	145794	140039	158736	148959	146629	136108	105760	151628	Stress
875	P53731	ARC35	17528.4	19790.2	18008.3	17990	18147.3	17507.2	17816.8	17688.3	18065.2	17048.8	19232.1	20028.3	9628.96	13942.2	13401.7	13205.3	13680.8	13603.6	12775.3	13236.6	12243.7	12287.3	13231.7	11998.1	11240.4	9211.03	12882.2	Other
876	P53860	PDR16	3259.1	3227.46	2887.6	2786.59	3026.83	2517.23	4418.37	4730.84	4324.12	5322.16	5147.26	6156.59	3943.87	5125.52	5558.44	6484.02	6081.63	6526.6	6640.62	6584.8	6443.96	7114.94	6502.51	7040.81	6169.63	4687.05	7743.83	Other
877	P53920	NMA111		1588.04	1359.07	1520.25	1608.46	2002.49	3635.81	2293.41	3451.7	2640.19	4907.61	4326.86	2174.82	1806.8	3245.49	3413.04	4624.65	4879.21	3403.56	3776.39	5269.49	3838.12	3606.73	4281.6	3341.57	3202.5	5030.07	Other
878	Q01662	MAP1	7453.06	7089.87	7327.1	7217.16	7043.67	7139.77	9966.54	10405.1	10169.4	10782.2	12046.2	11638	7618.46	11167.3	10258.7	11401.9	11092.3	11036.6	11058	13042.2	11114.9	16372.4	16515.4	16207.3	16961	14115.6	22771.9	Tanslation
879	Q02204	MRPL13	4046.68	4352.52	4434.85	4688.38	5160.76	4806.97	9098.81	9221.03	8082.86	9779	11605.3	11425.9	6991.59	10987.6	9284.25	12348.6	12718.2	12402.6	13496.2	15658.1	13931.3	16137.7	15736.1	15093.1	14512	12119.3	16408.8	Mitochodria
880	Q02206	RSC4	1089.48	985.087	1110.67	1103.78	1163.09	1147.65	1467.31	1518.87	1459.89	1784.7	1599.66	2092.11	1127.43	1393.71		925.825	1469.72	1626.54	1605.47	1715.76	1771.68	1748.83	1640.54	1515.2	1673.88		1751.82	Transcription
881	Q03430	RSM28	2602.91	2782.76	2923.66	3159.74	3542.29	2983.57	5326.96	5861.16	5194.84	6324.72	7590.31	7214.81	4004.98	6349.27	5502.38	6931.15	6932.72	6788.23	7148.67	8559.78	7458.32	8946.28	8656.66	8491.07	8252.53	6224.27	9095.58	Translation
882	Q03653	EFR3				183.417	379.664			500.259		184.312									207.897	487.692					142.49			Mitochodria
883	Q03921	DOP1		83.5009	80.9635		72.3697			86.4315		39.4977	63.4281	84.9238	63.7576	40.9403			63.6643				136.439	59.3415	67.8173					Mitochodria
884	Q04013	YHM2	19362.7	18991	18859.1	24378.2	25165.6	24746.8	35420.5	34749.5	33523	40365.3	38802.8	46300.2	27038.5	33694.1	36731.8	38959.2	34963	42671.8	40612.4	36359.5	40474.1	33703.3	29812.6	33390.4	27656.5	17998.4	34914.9	Mitochodria
885	Q04305	UTP15	1571.33	1464.55	1574.37	1884.71	1774	1546.79	2093.69	1765.35	1605.63	2558.78	2100.21	2459.4	1393.53	2079.32	2213.22	2085.3	2198.01	2482.06	2599.88	2295.23	2593.18	2671.21	2098.12	2831.31	2622.02	1862.49	3314.09	Transcription
886	Q04371	YMR027W	7831.49	8352.65	8725.4	8965.24	8381.52	8601.28	10608.1	9933.96	9198.99	9142.73	10358.8	11633.9	6187.74	8110.31	7984.99	7575.64	8300.39	8594.14	7500.08	7965.89	7569.23	8032.07	8191.09	7044.32	7334.52	5764.77	7630.29	Other
887	Q05812	MSC3	4922.39	4454.41	4119.2	4090.11	3695.95	3304.31	3116.05	3303.19	3231.9	2895.1	3356.16	2922.91	1471.92	2070.71	1838.55	1750.98	1940.5	1512.8	1906.68	1584.44	1510.44	1574.97	1410.06	1288.78	1516.76	1099.25	1571.1	Stress
888	Q06078	UTP21	1958.65	2141.53	2949.78	2476.29	2427.69	2078.38	3028.9	3129.54	3121.55	3053.35	3654.33	3886.71	2194.96	3142.96	2744.85	3323.5	3125.19	3540.98	3494.04	3538.78	2880.45	4024.11	3823.19	4389.49	3760.17	3059.08	5098.73	Chaperon
889	Q06489	MRI1	3477.23	3704.01	3901.07	4001.4	3669.84	3916.84	5191.9	5005.26	4818.51	5297.35	6229.75	5868.32	3315.29	4680.01	5033.38	4967.11	4844.06	5073.56	4424.7	3723.16	4507.94	4179.83	4097.75	3972.5	3706.11	2804.78	5045.31	Other
890	Q06494	YPR127W	22424.5	24105.5	24234.7	24860.7	17643.8	23616.9	12269.9	11241	14056.4	8436.48	7904.59	8906.85	2292.34	2222.03	2034.49	1109.12	1093.28	1379.85	1053.33	1343.37	1246.08	1247.54	1171.29	1307.85	1359.31	867.956	949.078	Other
891	Q06631	BFR2	1128.72	1003.4	1172.58	1164.86	1258.49	1023.4	1686.85	1706.11	1547.83	1775.6	2202.5	1749.42	1227.11	1792.91	1380.09	1944.54	1803.82	1865.59	1903.06	1708.56	1779.87	1827.31	2154.91	2049.06	1756	1594.33	2384.71	Other
892	Q06668	OMS1	7156.42	8804.33	6571.92	9131.66	8190.25	6399.83	12818.2	12954.2	11451.4	16946.2	16413.8	15891.4		13981.6		15141.3	15454.1	19389.2	15285.3	17826.8	17081.2	15084.9	18330.2	14383.9	14704.6	13554.7	17990.5	Mitochodria
893	Q06679	UTP4	1384.67	1350.83	1582.6	1420.46	1530.35	1517.12	1836.56	1920.48	1918.46	1839.06	2060.67	2224.6	1444.15	2363.79	1943.78	2101.11	2480.48	2405.91	2362.84	2732.01	2686.31	2851.66	2699.01	2600.75	2478.27	2250.58	3212.49	Transcription
894	Q06698	YLR419W	184.558	216.02	265.163	185.541	269.785		339.557	288.888	325.631	221.567	332.905	281.137	185.182	328.687	436.05	333.266	333.586	268.796	264.243	417.482	372.124		266.173	279.12	231.438	232.53	328.351	Mitochodria
895	Q06705	CSR1	4012.32	4967.07	4230.2	3491.66	3259.98	3750.89	4226.7	4557.99	5171.41	5522.84	3927.41	6884.84	3221.13	4557.83		5210.79	5048.09	5684.96	4472.54	4554.15	5135.1	4767.14	4649.47	4187.8	3900.08	3159.21	5127.82	Mitochodria
896	Q07418	PEX19	2932.52	3056.3	3168.93	2612.35	3121.13	2471.58		3213.08	2867.93	3124.97	3281.09	3618.64	2169.96	2907.38	2410.47	3471.91	3021.71	2974.1	2947.37	2901.75	2677.34	3230.21	2758.38	2491.36	2685.26	1981.25	2814.67	ER
897	Q08444	NOB1	2150.21	2540.41	2648.07	2394.71	2621.56	3040.52	3243.12	4815.54	3121.16	4033.76	3925.45	4963.46	2882.61	4350.7		3592.24	4738.64	5104.92	5176.21	4501.39	5397.04	5225.05	4600.09	4138.47	4172.39	3514.29	5578.73	Translation
898	Q08686	TUM1	5043.94	5894.38	4973.03	4845.87	4454.13	4667.37	4950.45	4666.55	5181.69	4626.52	4747.26	5213.34	2488.07	3989.98	3588.7	4093.17	4013.46	3465.49	3674.16	3201.37	3499.17	4014.76	2951.74	3428.48	3295.67	2708.52	3836.44	Other
899	Q08924	RTT10			572.632	1131.28			1037.27	1324.6	1467.73	1095.89			695.405		1060.91			1547.37	1188.54	1228.39			1698.12		1611.91			Other
900	Q08951	APL5	588.954	611.247	679.992	609.475	676.119	412.656	847.865	981.763	704.477	703.403	672.323	719.046	538.992	660.032		510.563	563.615	648.462	515.15	670.783	639.598	574.137			422.194			Other
901	Q12032	AIM41	55815.1	53831.1	57284.4	56068.3	52544.9	58092.1	48319.1	50697.5	54612	47242.1	48446.8	53605.1	26112	34140.4	33430.3	30911.4	32170.1	31820.6	26853.9	25425.6	29032.7	21834.2	20195.5	18936.4	15942.3	11731	14149.4	Mitochodria
902	Q12034	SLF1	2849.77	3230.48	3354.01	2704.15	2949.27	2933.57	3522.91	3565.93	3207.25	3876.31	4823.77	4600.87	2981.3	4264.97		3998.76	5041.63	5123.93	5416.35	5755.09	5691.43	6296.87	5713.28	5147.39	4642.96	3863.7	5539.42	Translation
903	Q12068	GRE2	17715.6	20210.2	17558.7	16409	18828.6	16931.5	13359.1	14381.7	13397.4	10373.8	10327	11021.4	3851.4	4187.4	3813.65	2001.62	2354.09	3097.3	1900.81	1929.65	2458.44	2545.41	2291.51	4584.32	2472.71	1651.08	4306.31	Other
904	Q12153	SSF2	816.573		847.984		770.941	1259.66			955.672			917.636	526.248		902.414			904.747			795.213			763.713		770.261	868.999	Translation
905	Q12464	RVB2	11236.3	11538.6	11585.9	11794.4	11781.3	12346.5	13177.6	13100.5	12457.1	13740.6	14403.8	15171.6	9020.22	12415.4	12286.1	12496.4	13542.2	13839.1	12266.9	12826.5	12840.3	11094.5	11801.4	11657	10600.4	9268.27	12323.5	Transcription
906	Q99247	YOL087C	531.593					355.225					486.415						276.511	248.273				394.689						Other
907	P00044	CYC1	87066.2	90120.1	91717.2	96995	95744.3	107358	148633	159654	138363	195442	196413	228023	138085	220688	219841	258001	267434	278297	324765	381666	335527	385040	370811	351749	299645	235257	306812	Mitochodria
908	P00431	CCP1	10080.8	10841.4	10155.9	9959.49	9680.13	10625.5	9146	9914.76	9890.29	10122.5	11196.3	11059.1	6321.46	9460.37	8447.29	8210.24	9113.59	8343.98	7153.37	7330.18	7504.56	6630.67	6721.36	5527.42	5157.91	4250.76	5613.81	Stress
909	P01120	RAS2	15612.7	15409.4	14975.6	15410.6	16057	14581.3	16977	18873.3	17156.1	17101.2	17789.4	18918.8	10475.8	14535.2	13451.9	13255.3	15244.6	12947.9	11045.7	11765.9	10924.8	11436.9	11805	10965	10263.4	7716.17	11164	Other
910	P05750	RPS3	192988	194332	213689	205769	224165	222842	275337	284428	274840	301915	314512	332363	202897	300244	279290	306355	314986	336493	332216	371826	335016	413097	402732	395373	372521	303710	466745	Tanslation
911	P06782	SNF1	1923.49	1856.38	2168.17	2257.58	1612.76	2363.46	2733.46	1817.57	2482.84	2676.53	3164.67	2811.16	1947.6	2604.04	2680.29	2492.87	2118.61	3133.7	2834.18	3270.95	3125.75	3400.31	3372.48	2867.28	2537.77	2152.57	2909.55	Stress
912	P08536	MET3	59200.6	58724	56804.1	68173.8	66735.3	55900.4	82601.5	75993.8	71153.3	92910.2	85568.5	107783	69730.2	79585	94249.9	101906	91900.2	108804	116260	112878	112500	117929	98449.5	112578	95156	62990.3	128281	Nucleotides
913	Q3E757:P0C0W9	RPL11B	170902	173835	177883	176335	185178	203204	252870	277601	247180	278070	337268	346502	187021	300941	265508	294203	314041	312616	316131	334043	326012	356864	353455	343238	325444	267705	407464	Tanslation
914	P0CX48:P0CX47	RPS11B	196865	192998	206931	212200	244791	256640	277191	321020	326345	293259	326613	325955	201470	311485	283105	301832	315838	327869	322012	371312	335586	400706	391354	390835	360964	302219	453404	Tanslation
915	P0CX56:P0CX55	RPS18B	261477	242254	255031	254041	266894	290337	343684	343571	367768	384960	401691	430569	248209	383239	345066	379707	396133	411327	411950	447623	421035	502424	487492	492416	461466	382950	572343	Tanslation
916	P12686	MRP13	4731.48	4739.81	4917.01	5271.18	5271.9	5438.67	9707.42	9582.48	9075.95	10514.5	11760.3	12318.3	7251.31	10419.6	10502.7	11277.4	11759.9	12274.1	11383.3	12401.1	11773.1	12478.3	12798.1	11942.1	11477.6	9338.81	13379.8	Mitochodria
917	P12688	YPK1	1238.75	1229.58	1397.88	1665.4	1435.29	1630.85	1824.43	2188.8	2071.71	2703.03	2678.21	1907.29	1644.77	2013.89		1976.16	1860.17	2017.51	2026.73	1967.68	2028.29		2028.55	2057.75	1802.83	1039.9	1781.35	Other
918	P12753	RAD50	160.763		190.283	106.841				139.544						180.281					216.611							110.518		Stress
919	P13298	URA5	13414.8	13526.7	11794.8	14714.5	13147.1	11272.9	19875.9	16485.1	14114.2	19549.1	16872.1	19769	13088.1	14512.4	15362.3	13067.5	13447.6	17838.2	21050.4	13028.6	15128.1	13960.7	12704	12353.2	11085.5	9608.39	16742.6	Nucleotides
920	P13382	POL1													181.882	329.4		374.032	388.695	340.636	271.086	248.942		362.583	260.885		256.957	201.443		Stress
921	P15992	HSP26	3.65696e+06	4.33924e+06	3.97178e+06	3.7861e+06	3.06248e+06	3.84062e+06	2.15762e+06	2.14862e+06	2.25448e+06	1.4139e+06	1.25136e+06	1.4434e+06	316758	233694	237924	36811.3	28787	34151	29966.4	24192.5	34886.7	18221.8	18855.7	29468	12755.7	8716.93	20371.5	Chaperon
922	P17505	MDH1	78449.6	76938.1	80639.4	77507.1	85065.7	83922.3	89398.7	90778.1	92739	93431.9	103095	108713	67557.8	99597.8	89424.3	104608	109997	108959	117273	147688	121460	128675	130972	118806	102182	74429.9	92021.5	Mitochodria
923	P19262	KGD2	77075	80430.9	77618.1	74837.3	81907.2	82339.5	84831	83057.8	80681.8	85948.9	87600.5	92701	56692.1	82438.1	86081.8	84134.3	85585.3	87466.5	86388	111902	86924.7	93626.3	96663	88603.6	76123.5	55771.5	72798.3	Mitochodria
924	P19454	CKA2	5795.7	5306.38	5142.89	5268.86	4616.7	4631.2	6031.99	5636.38	5250.44	5798.61	5796.4	6684.63	4074.73	5153.04	5470.45	5911.27	5304	6257.09	5656.76	5322.62	5813.63	5691.18	5273.79	5525.61	4649.47	3444.55	6152.47	Stress
925	P19881	PHO13	4074.64	3643.35	3796.96	3656.59	4266.13	4113.66	6283.85	5491.5	5739.59	7084.48	7418.02	7920.89	5483.58	6765.08	7692.35	7347.02	7662.26	8605.43	7474.1	7780.17	7876.39	8901.02	8071.33	8525.3	7526.33	5486.35	9784.5	Other
926	P21242	PRE10	67400.9	68536	69550.4	66833.2	68579.6	70872.8	75381.3	78061.9	72480.7	74035.3	81139.3	85299.5	42716.3	69191.1	60639.9	63011.3	65359.3	62364	54627.7	63001.4	61369.3	62258.1	64564.9	58453.5	56683.1	44627.4	67668.7	Other
927	P21243	SCL1	43135.7	43555.4	44948.3	45203.8	43132.3	43777.7	46080	50172.4	47162.5	50114.4	51191.4	54112.3	28606.9	40325	37017	37834.5	39805.9	37278.1	35321.7	35781.9	37829	34592.5	36547.5	33676.6	32218.6	25565.6	38526.7	Mitochodria
928	P22517	CMK2	3845.04	4310.73	4057.53	3934.3	3969.36	4213.79	4295.01	3938.26	3851.25	3864.94	4447.8	4448.2	2089.5	3313.28	2350.12	3075.39	3452.93	2769.13	3176.14	3505.27	3166.53	3434.71	3524.22	3316.86	3563.25	2485.44	3523.1	Other
929	P22936	APN1	1660.61	1448.86	1646.19	1551.67	1662.05	1545.56	1614.34	1951.95	1863.29	1601.59	2181.19	1843.08	1123.87	1958.28	1625.85	1580.53	1717.98	1624.35	1932.64	1803.82	1587.11	1568.15	1979.84	1791.59	1573.85	1184.66	1873.25	Stress
930	P24583	PKC1	649.848		564.854	632.809	566.85	531.542	609.64		452.664	502.974		522.411	376.641	495.498	529.361		362.274			502.851	422.281	507.031	453.596			457.51	431.13	Other
931	P25038	IFM1	566.958	313.256	703.858	558.717	819.202		910.376	1101.06	832.726	916.303	1453.21	1480.67	909.834	1259.44		1546.31	1482.09	1242.84	1612.15	2175.2	1720.28	1782.95	1647.65	1777.38	1469.24	803.331	1783.03	Mitochodria
932	P25343	RVS161	15406.6	14437	15164.6	14355.2	14245.5	14940.5	15982.8	16650.3	15307.8	16243	17153.7	18062	10155.5	12562	13046.4	11885.1	12893.2	11938.7	11638.3	12075	11711.6	11987.5	12056.4	11203.3	10558.3	8040.1	12446.5	Stress
933	P25374	NFS1	5539.9	5831.93	5779.16	5694.06	5845.13	5741.16	7080.73	6981.76	6596.31	7511.86	8410.35	9076.28	5333.96	7833.34	7370.39	8495.08	8806.24	8512.62	8927.97	8840.36	8800.98	8932.37	8699.91	8608.14	8463.72	6122.59	9350.6	Mitochodria
934	P25567	SRO9	2305.42	2397.13	2310.07	3190.52	3448.19	3289.49	6071.26	6408.28	5574.64	7698.99	8259.34	8548.59	5858.56	8696.2	7964.6	8815.52	9248.73	9346.84	9772.3	11291.4	9627.43	12912.8	13028.4	12232.7	13268.4	10667.2	16605.5	Other
935	P27796	POT1	28985.3	31319.4	25104.3	23380.5	24188.4	24805.3	18847.7	16680.7	18500	14131.5	13113.9	12687	6858.62	9591.59	9019.19	6834.5	7405.76	6949.25	5940.54	2966.31	6189.46	2077.78	1779.12	1220.53	997.868			lipid metabolism
936	P29704	ERG9	7496.95	5867.68	6298.73	7707.47	7409.46	7435.83	12063.1	11426.5	10077.7	9411.54	11060.1	13430.6	7405.07	8054.84	9393.5	7403.14	6761.71	8030.83	6986.49	7751.3	7045.51	7833.85	8667.03	7594.75	7286.04	6632.36	8587.49	lipid metabolism
937	P32263	PRO3	13663.3	11002.4	12246.4	14418.1	13141.6	11857	18435.5	16129.6	15707.8	19303.9	18692	19176.7	13669.7	16190.8	16729.4	17640.2	16736.9	19768.6	19898.3	18598.1	17972.8	18608.3	15820.8	18883.7	15223.3	10816.1	21328.6	AminoAcid
938	P32381	ARP2	28263	28237.9	28348.8	25624.2	22337.9	23564.3	23063.6	23579.5	23719.1	21722.1	25409.5	26755.8	13909.4	19105.9	19550.8	19827.8	20447.9	19289.1	18837.1	19082.4	18778.9	17999.5	18357.1	17298.5	16636.3	12595.8	17648.7	Mitochodria
939	P32485	HOG1	3702.95	2815.59	4017.1	3182.62	3035.09	3326.17	5746.92	5648.68	5073.71	5916.59	5992.32	7150.17	4748.94	7134.91	5589.63	7095.82	7049.95	8665.03	7159.52	8364.02	8448.52	7600.23	7828.99	8204.04	6987.52	5229.31	8155.11	Transcription
940	P32492	MYO4																			13.6471									Mitochodria
941	P32501	GCD6	3416.48	3162.27	3365.78	3380.75	3250.97	3518.7	4356.9	3983.92	3991.14	4322.67	4662.32	5290.56	2865.76	4347.97	4047.86	4236.32	4444	4298.11	3944.9	4241.51	4546.36	3408.68	4794.35	4588.89	4824.83	4198.33	5589.76	Tanslation
942	P32566	SMI1	8720.02	8743.8	9262.38	10036.6	10903.3	9894.83	17331.3	17244.7	15264.2	17825.5	20223.8	21343	13413.2	20034.7	18421.8	21774.5	20584	17586	17247	20537.3	18965.4	19569.9	19347	17287.4	16002.2	13100.2	17469.6	Other
943	P32787	MGM101	10781.8	11943.8	11282.6	11524.3	11346.9	11029.1	13515.4	14185.3	13533.5	13926.5	11148.3	15366.8	8588.24	12441.1	11646.5	12073.7	12671.2	12425.9	12274.8	12491	11629.2	11462.3	11617.5	10766	9838.23	8125.59	11359.6	Stress
944	P32832	NPL6	2464.93	2592.46	2546.7	2645.81	2615.01	2486.02	3447.28	3819.49	3152.72	3408.77	3963.16	3817.39	2465.36	3683.21	3529.96	3396.13	3466.31	3425.03	3431.48	3697.51	3570.26	3872.24	3728.06	3687.8	3458.69	2859.42	3921.95	Transcription
945	P32839	BCS1	1221.72	1171.9	1192.25	1565.12	1772.76	1412.25	2500.92	2813.18	2351.12	2744.15	2896.18	3445.3	1994.34	3319.42	3076.06	3383.76	3744.82	3646.69	4350.28	5573	4619.37	4688.52	4771.01	4542.3	4114.26	1867.63	4748.57	Mitochodria
946	P33333	SLC1	2791.36	2597.15	2680.36	2412.01	2648.11	2311.3	3033.15	3024.86	2830.24	2908.49		3910.26	2460.71	3410.69	4030.82	3619.39	4014.84	4121.33	4280.03	5177.26	4248.05	4500.21	5175.07	4325.01	3984.62	3026.44	3824.14	lipid metabolism
947	P34730	BMH2	407811	407147	404486	401107	356946	388671	380541	376344	368288	378556	409416	414515	210947	296525	288455	274557	283951	280517	256207	273283	272983	254356	252231	244114	220288	172754	247352	Other
948	P35194	UTP20		157.419		300.808	323.006	506.977	352.023	334.42	350.731	465.831			209.478			336.626		639.659	395.391	520.264			491.412	468.707	486.213			Other
949	P36150	MET1	2605.97	2699.85	2626.7	3127.08	2993.3	2954.7	4206.17	4416.66	3794.22	4691.57	4363.36	5087.8	3180.19	4849.38	4752.6	5193.52	5556.32	5540.2	5412.2	5423.59	5825.9	5392.43	5401.59	5551.02	5153.72	3933.34	7488.39	AminoAcid
950	P36160	RPF2	3712.61	4891.4	3488.71	4340	4698.93	5027.05	7012.46	7477.69	6184.08	7122.19	7638.12	8358.39	5129.23	7282.19	7408.45	7590.69	8510.12	7608.76	8063.6	7383.38	8006.98	8228.28	8515.88	7545.5	7688.55	6391.41	9658.19	Other
951	P38065	APL3	263.512				364.08	425.028		442.359	405.699					425.135				418.65	278.801		456.05		443.998		446.151			Other
952	P38120	MRPS9	3230.45	3034.93	3139.91	3748.13	4420.75	4117.64	7496.6	7274.26	7860.22	8273.61	9733.29	9238.76	5751.44	8998.38	9256.85	9846.05	10277.3	10290.7	11273.2	13046.3	11096	14504.1	13636.5	13022.5	11546.9	9489.79	13357.9	Mitochodria
953	P38169	BNA4	1370.1	1279.5	1201.23	1499.61	1631.21	1166.65	2335.1	1876.71	1662.11	2609.13	1982.08	2447.21	1861.53	1415.08	2098.99	1696.34		1852.19	2337.39	1622.19	1822.74	2199.34	1408.43	1466.09	1508.08	854.756	2114.3	Mitochodria
954	P38174	MAP2	7305.86	7440.84	8866.47	6709.4	6701.22	6994.14	8436.2	8881.13	8351.06	8788.12	9511.15	10281.1	5574.73	8248.89	8060.13	7012.19	8197.7	8690.92	7726.65	8078.15	7947.02	8952.31	8652.14	8369.9	8335.45	6660.66	9356.79	Other
955	P38260	FES1	17850.9	17666.2	18235.3	16839.1	14610.9	15145.8	13336.2	12810.6	11368.4	11837	10734.7	12155.8	6443.16	8247.91	8277.87	7866.12	7551.9	8905.29	8898.15	7322.11	8158.36	7037.86	7021.12	7240.33	6494.73	4953.05	8806.82	Tanslation
956	P38264	PHO88	31114	28109.2	29565.5	35277.5	32718.4	33964.7	46829.1	48043.2	43504.4	42296.8	53116.3	58549.7	31140.9	42827.8	42875.4	43442.2	44760.9	45865.1	46344.3	45281.8	45260	43081.9	42857.3	38697.3	36296.1	34328.3	44677.1	ER
957	P38323	MCX1	3947.59	3591.77	3915.74	4290	3682.07	4087.76	5623.53	5662.02	5599.72	5528.8	6190.25	6710.73	3763.54	5567.65	4661.68	5599.2	5159.81	6119.49	5817.38	5623.36	5459.55	5690.95	5557.03	5647.93	4939.2	3962.01	6427.2	Mitochodria
958	P38698	PPX1	2973.75	3014.97	2945.9	2774.48	2906.48	3031.8	4287.34	4389.94	4202.5	4750.04	6109.91	5182.59	3163.32	4553.1	4433.62	4387.35	4513.67	4319.02	4561.87	4180.64	4433.12	3817.83	3929.5	3653.96	3475.9	2948.12	4288.68	Nucleotides
959	P38712	RRP3	1324.12	1416.69	2022.45	1962.37	1819.8	1913.97	2747.02	3155.62	2409.98	3118.5	3836.67	4163.92	2646.84	3855.48	3743.17	4419.47	4345.97	4694.78	4562.13	5001.81	4327.09	4741.92	5212.33	4608.43	4149.08	3651.48	4388.24	Other
960	P39925	AFG3	2708.6	2865.26	2832.97	3378.99	3548.18	3474.95	5020.48	5940.07	4671.89	4184.62	5289.89	6433.27	3698.64	5025.81	4760.42	4758.19	5366.85	5700.15	6123.23	6618.11	5858.85	5867.01	5765.73	5080.38	4816.99	4685.12	5375.73	Mitochodria
961	P39966	PTC2	5346.04	5301.65	5274.83	6056.39	6185.55	5547.54	8297.45	8649.22	8141.18	8824.06	9467.58	9679.18	5491.78	7671.45	7932.51	7246.13	8452.78	7916.51	7306.8	7880.6	7453.01	8029.55	8194.34	7662.66	6513.59	5845.32	7985.78	Stress
962	P39993	GEA2			968.062		946.314		2052.03	1726.92	1537.08	1520.32				1027.1		373.315		1221.57	1064.18	1429.69			1270.01	1387.38	1148.69			Other
963	P40008	FMP52	55155.6	52361.3	56264.4	55790.5	47343.3	58561.9	49867.3	48746.2	48614.7	45482.3	48742.9	49726.9	26468.2	33220.9	34452.5	31472.4	34292.8	30466.9	26224.6	25361	27760.2	23426.4	24554.4	22177	20387.6	14844.3	22577.7	ER
964	P40012	HEM14	2382.82	2289.49	2144.23	1879.47	2431.47	2608.68	1992.05	1731.92	2763.28	2097.66	2566.87		1327.35	1955.82	1672.53			1528.3		1386.13	998.414							Mitochodria
965	P40040	THO1	6568.46	7187.6	6742.28	6758.72	6550.45	6638.71	8076.85	8422.8	7545.72	8649.82	9475.26	9251.76	5560.07	7827.37	7185.84	8000.52	7937.23	7605.04	6768.41	7455.58	7109.94	8377.93	8299.74	7564	7043.59	5990.95	8034.41	Transcription
966	P40078	NSA2	1595.07	1558.54	1644.45	1714.44	2153.64	2064.66	3069.22	3359.39	2778.63	3481.4	3997.89	3840.93	2424.71	3553.96	3475.57	3644.14	3952.46	3702.81	3947.37	4035.78	4097.34	4694.71	4627.72	4556.66	4415.76	3474.23	5704.58	Other
967	P40541	IRR1			56.8097		58.6261		81.0189	119.373	80.761	81.0755	90.6918	88.3369	71.8951	153.012		92.1204	99.1465	113.986	82.9843	124.197	99.4422			73.9592	138.752	72.4803	95.5044	Other
968	P41903	TES1	11456	11063.5	9671.16	11929.7	12480.7	11005.1	13550.7	13439.3	12678.4	13196.1	13886.8	15236.8	9063.31	12389.5	11250.6	12573.5	12962.6	13360.7	11213.4	9131.01	11634.2	5814.31	5955.57	5647.55	4638.68	2786.31	3523.75	lipid metabolism
969	P42073	REF2	606.403	632.168	465.15	928.494	747.484	560.856	699.383		686.545	672.115		946.91	517.181	750.833				653.207	619.62	708.522	601.643			552.767	570.665	521.074		Transcription
970	P42826	XKS1	1634.39	1446.36	1626.12	1791.06	1731.62	1785.76	1939.72	1812.13	1816.23	1925.19	1787.63	1984.28	1213.22	1530.32	1253.96	1359.09	1316.81	1242.99	1207.12	1517.94	1511.73	1640.03	1643.42	1311.54	1263.19	895.813	1228.81	Other
971	P42938	TDA10	19541.6	19247	20039	21250.2	18001.8	17114.9	18226.8	17044	16349.7	18133.4	18927.3	23050.6	11483.6	14075.5	15305	15299.7	15175.6	14804.3	11922.6	10254.8	12154.8	10437.5	9172.46	9349.56	7235.04	5461.78	8767.24	Other
972	P43555	EMP47	1967.46	1596.91	1621.1	1705.66	1599.2	1670.66	1866.68	2086.07	1747.18	1650.23	1708.91	2055.51	1015.41	1572.51	1391.64	1292.16	1655.09	1650.24	1372.81	1392.45	1401.72	1171.18	1203.2	1032.39	974.587	891.518	1023.48	ER
973	P43556	RGD2	1212.38	1173.99	716.196	1184.85	653.296	988.044	1351.95	1193.04		1470.28		1484.4	870.754	920.189	1186.68	1674.42		1560.19	1531.83	978.833	1146.89	1127.93	888.191	1203.88	865.124	348.399		Stress
974	P43612	SAP155	564.213	567.314	488.813	610.731	592.63	826.894	687.098	818.71	739.276	622.081	509.906	867.083	364.859	699.193	452.49		685.854	748.319	738.463	575.812	697.474	735.554	796.586	623.093	555.297	556.813	661.473	Other
975	P43638	MHP1	267.033	275.873	305.45	314.057	378.82	242.691	337.844	336.33	356.289	288.208	392.405	430.27	270.391	354.611	325.375	242.949	326.268	310.565	261.245	239.196	360.12	312.389			194.261	190.26		Other
976	P46985	MNN11	2037.98	2025.82	2152.64	2397.27	2371.1	2239.79	3089.93	3414.3	2639.94	2996.73	3689.36	3571.01	1695.61	2760.55	2738	2803.44	2992.38	2792.86	3099.62	3233.84	3095.16	3080.26	3103.56	2506.76	2490.49	2347.63	2821.49	ER
977	P46995	SET2		23.2507	32.8555	21.4077	37.8064	99.1095	31.0177	34.2707		30.281			28.9352	32.7474					23.9569	30.8398			32.1386		31.4853			Transcription
978	P47006	RPA34	2383.88	2614.07	2242.91	2289.71	2732.9	2612.24	4007.02	4139.2	3939.79	4270.07	4730.01	5051.07	2924.34	4364.12	4932.63	4631.63	4660.95	4779.17	4686.33	4759.67	5434.76	5660.5	4986.45	5146.93	4868.04	3996.28	6310.65	Other
979	P47052	YJL045W	3766.4	6259.8	4758.11	5569.2	5343.36	5755.93	4098.36	3724.76	3907.45	2642.89	3141.1	2395.16										760.07						Mitochodria
980	P47089	TMA22	11377.8	11320.4	12389.9	9990.86	11204.9	11249.5	12706.5	13326.2	12875	13986.2	14777.2	15353.1	8843.54	13108.9	11914.9	12809.4	13602.6	13422.7	12808.4	13577.9	13108.8	13936.3	13662.6	13384.9	11262.3	10055.8	15419.2	Other
981	P48231	TCB2	158.42	171.454		233.832			399.615	289.38	320.245	456.993	414.127	587.247	312.738	438.521		473.365		478.012	394.489	456.217	315.681	399.197	463.143	485.414	392.105	350.067		ER
982	P48526	ISM1	222.346																		1190.45			1595.16			1130.8	943.839		Mitochodria
983	P48563	MON2	37.9959	12.2958	55.2067	13.3884	17.5284		57.5622	43.2926	50.7265	43.7651	38.5398		27.8124	33.9941					33.9657	37.9697		22.5478		37.7682	30.5861			Other
984	P53131	PRP43	4292.3	4084.51	4684.11	5743.22	5366.08	5399.58	7320.57	8224.85	7673.03	6864.56	9101.26	9424.26	5505.41	7015.76	7595.72	7323.82	7422.77	8227.74	7950.1	8430.85	8785.25	9505.63	9795.56	8647.33	9372.06	7869.83	12397.2	Mitochodria
985	P53136	NSA1	1708.43	1537.55	1812.36	1697.36	2034.53	1837.69	2372.01	2352.24	1670.18	2277.02	2116.63	2395.68	1532.12	1337.4		1271.07	2192.68	2444.74	2627.82	2383.89	2354.13	1924.77	2634.21	2034.38	1848.38	1819.33	2875.26	Other
986	P53313	SDA1	249.725	275.455	315.726	462.425	237.83	352.586	375.111	430.498	453.642	372.54	698.165	763.881	410.545	455.898		492.098	602.404	604.651	591.002	701.241	590.243	758.241	755.605	776.151	766.556	639.48	1082.97	Other
987	P53552	THO2		14.0509		111.556	98.6043			14.4537					94.5688	97.9782		113.084						10.6924				70.6957		Transcription
988	P53848	FOL1	1368.68	1148.36	1284.72	1556.41	1416.91	1446.5			1049.11	1719.92						1584.15	1754.42		1525.16	1958.63	1595.42	1892.24	2349.61	2025.07	1896.31	1524.5	2020.48	Mitochodria
989	P54860	UFD2	1118.04	1063.75	1312.59	1186.19	1227.6	1194.4	1361.08	1293.49	1332.2	1227.5	1684.55	1562.52	797.287	939.095	1308.31	1222.69	1204.09	1235.34	1198.7	1116	1306.92	1198.93	1068.39	1005.98	1048.32	967.762	1169.41	Stress
990	P89886	TMA20	6794.91	6693.82	6367.76	6183.62	6285.11	6271.65	6976	7554.01	6990.44	7980.97	8887.59	8598.71	4731.33	7079.34	6301.68	6710.13	7133.65	6927.91	6314.3	7486.92	6777.59	7645.58	7433.54	7283.2	6968.81	5432.33	8095.34	Other
991	Q00362	CDC55	4436.42	5102.81	5620.61	5031.08	5211.09	5160.73	5301.03	5634.15	5793.76	5231.82	5959.73	5640.3	2670.38	4331.95	3916.45	3677.69	4241.5	3776.57	3806.43	3994.78	3747.93	3945.41	3636.88	3579.17	3736.12	2862.09	4015.68	Other
992	Q01080	RPA49	1855.63	2138.96	1980.03	2187.49	2458.82	2185.86	3479.75	3481.38	3279.2	3264.8	3812.22	4220.18	2389.4	3587.16	2883.06	2950.86	3486.49	3577.46	4098.22	3940.46	3691.92	3180.67	4061.99	3895.27	3804.83	3258.72	4605.4	Transcription
993	Q02196	MET14	40580.2	40895.1	42855.3	43956.3	45129.7	46459.4	61767.1	63016.2	60789.8	70921	81125.9	84101.7	51842.8	79207.1	75257.1	90961.7	93634.8	92382.5	93246.4	93602.1	94416	97465.2	95334.8	94015.2	89129	72418.6	112231	Nucleotides
994	Q03010	UME1	1050.69	1119.09	831.941	1268.06	1411.63	1163.22	1470.63	1607.6	1272.31	1243.71	1847.35	1528.72	907.474	1443.39	1261.55	1231.84	1486.01	1438.99	1269.01	1345.12	1288.53	1214.92	1139.69	1212.18	909.559	827.644	1287.45	Transcription
995	Q03028	ODC1	4579.68	4294.6	3721.83	6002.59	5366.69	4635.05	9004.16	6761.92	6096.07	9043.2	7892.26	9139.06	6912.4	7105.6	7580.85	6743.87	7932.05	8948.66	10635.6	7235.29	7869.99	5948.04	6854	6130.36	4525.83	3279.63	5322.65	Mitochodria
996	Q03516	RSN1	619.423	556.396		896.691	780.891		576.052	1014.96	818.72	801.641	1098.2	763.945	583.145	784.85		1250.53	582.131	316.352		817.548	705.596			649.439	613.69		929.071	ER
997	Q03558	OYE2	44845.8	43469.7	47000.2	42957.2	47326.7	42062	45688.5	45333.1	41357.6	44375.5	48341.5	51136.8	26338.2	36390.7	34128.4	32798.3	36535.7	33281	35487.4	52339.1	36784.3	70064.2	70621	72771.7	79228.6	66867.3	115504	Mitochodria
998	Q04225	RRB1	4309.46	4288.63	4571.91	4772.24	4825.46	4845.98	6141.21	6639.64	5921.01	6619.38	7634.44	7280.48	4742.73	6673.99	6171.14	6779.76	6717.02	6769.75	6673.22	6311.99	6564.64	6448.45	6217.48	6440.25	5699.93	5003.83	7033.33	Other
999	Q04500	UTP14		304.839			568.356			956.402	734.659	763.805	1039.81			772.808			921.935	831.628		1276.34	850.126	1306.19	1380.49	566.001	1418.78	1045.71		Other
1000	Q04792	GAD1	3203.66	2767.76	1836.54	2249.85	2861.24	1633.46	2482.7	2210.97	2231.49	1403.48	1722.22																	Stress
1001	Q04869	YMR315W	47547.3	50512.6	45582.8	47631.2	49327.2	52439.3	54634.9	54850.5	54586.4	52871.6	52479.5	58167.8	31331.2	43473.4	42269.3	36291.2	42722.2	39756.6	38432.6	41568.2	42513.4	34194.4	33100.9	30973.7	29121.9	20947.5	32719.5	Other
1002	Q05029	BCH1	3551.36	3357.03	3372.98	3411	3218.9	3124.96	3152.22	3480.05	3243.92	3428.89	3871.94	4177.29	2027.92	3077.44	2917.22	2472.02	3122.99	2658.03	2679.27	3198.02	2789.92	2664.71	2884.01	2604.95	2529.9	2777.76	3400.25	Other
1003	Q05515	SVF1	11702.4	10541.7	11054.6	9799.31	9421.05	8827.25	9433.7	9353.61	9522.07	10047.4	13466.5	13671	7490.51	9871.28	10453	10803.7	11052.9	10800.3	11529.9	9624.28	10505.6	13257.2	9563.71	10149.2	8603.49	6726.15	11019	Other
1004	Q06488	RSC2	364.384	407.882	442.793	318.354	356.593	458.748	444.08	465.755	437.437	431.791			403.833			596.346			565.241	552.412		494.407	586.876		458.187	420.889		Transcription
1005	Q06697	CDC73	3314.32	3233.96	3384.91	3095.86	3504.69	3046.78	4167.21	4640.19	4126.98	4652.68	4918.35	5223.13	2647.69	4344.33		4189.36	3814.78	3826.21	3927.99	4022.53	4040.8	2831.45	3245.93	3494.11	3169.71	2444.14	3412.39	Transcription
1006	Q07938	MEU1	9837.91	8251.99	8527.42	7746.63	9524.23	8648.03	16205.8	15826.3	15100.4	17640.7	21174.3	20479.4	13913.7	20866.6	20878.5	21563.5	22817.1	22613.2	20186.4	20939.2	20405.1	23581.2	22603.1	22063	20980.6	17453.1	25350.3	Other
1007	Q08224	THI20	294.995	448.371			429.522						493.525																	Other
1008	Q08446	SGT1	2031.03	2042.74	2337.72	2135.69	2158.18	2120.83	2175.53	2124.56	2540.52	2276.13	2563.26	2660.42	1456.55	2090.29	2230.11	2027.82	2126.69	2188.6	2359.03	1851.23	1918.34	1856.81	2415.24	1562.58	1562.77	1595.66		Chaperon
1009	Q12009	TRM8	5698.34	5358.69	6489.92	5412.23	5641.48	5209.97	6628.39	6856.36	6703.68	7273.72	7758.33	8725.53	5317.35	7570.03	7158.92	7566.16	8271.49	7679.25	7779.59	7984.59	7806.18	7562.89	8106.92	7761.27	7292.06	5579.8	8447.69	Other
1010	Q12074	SPE3	55896.1	53192.6	55477.7	52114.5	53540.1	55532.2	64233.3	69985.6	65683.1	74604.6	81405.1	84152.1	51225.5	79632.4	73526.6	84261.3	90710.1	87241.7	81085.9	79011.5	84128	82748	79344.5	82348.8	76524	59082.9	88529	Other
1011	Q12080	NOP53	2573.7	2686.89	2585.53	2319.49	2467.75	2582.06	2920.18	3331.84	2781.81	3350.83	3838.32	3391.07	2574.52	3799.61	3352.58	4237.63	3883.04	3930.62	3859.38	4066.3	4234.23	3874.41	4139.32	3810.93	3940.67	3232.32	4503.79	Other
1012	Q12136	SAS10	659.555	639.669	638.04	755.344	777.53	751.615	880.447	1236.4	925.792	1290.39	960.76	1289.58	782.758	1202.92	1179.3	1032.71	1260.93	1176.79	1290.46	1468.12	1320.65	1123.03	1269.87	1315.23	1512.23	1118.22	1716.53	Other
1013	Q12181	TAH18	349.925	309.688	269.168	302.388	284.036	295.851	496.372	437.799	395.231	448.757	490.981	548.707	303.467	399.477	496.941		341.428	430.189	520.344	375.372	433.53	441.043	403.992	377.877	431.414	298.148	463.41	Other
1014	Q12289	CRC1	3312.97	3671.13	3453.16	2760.4	2214.51	21070	2490.94	2511.85	4757.95	3357.38	2913.21	5078.32	2715.22	2843.12	8959.56	4447.44	3950.03	10051.2	4031.41	2954.35	7424.12	1808.74	1525.78	6034.06	1115.96	991.732	7993.36	Mitochodria
1015	Q12298	YDR061W	2424.72	2318.87	2410.76	2214.71	2538.69	2160.91	2648.67	2797.49	2639.24	2821.21	3220.22	3186.25	1917.33	2993.75	2849.66	2958.24	3166.47	2925.13	3261.6	3388.36	3310.58	3535.31	3431.49	3156.83	2823.92	2413.26	3292.64	Mitochodria
1016	Q12314	SFM1	11541.6	11208.4	11478.6	11368.1	10848.5	11004	13138.4	14239.9	13471	14477.1	16151	17325.7	10203.8	15029.1	14099.8	16031.2	16695.8	16399.4	16744.1	17536.1	17327.9	17355.8	17466.1	16728.6	15619	12517.3	18599.2	Translation
1017	Q12387	MDM20	149.827	181.67	123.506	236.537	202.929		293.261	278.297	247.618	267.022	368.382			303.966		262.913		257.265		286.283	227.038		337.489	320.157	273.8		300.23	Other
1018	Q12453	CEX1	1615.04	1650.44	1440.33	1600.96	1841.66	1587.14	1912.72	2019.89	1823.27	1787.44	2486.75	2499.35	1318.85	1504.42	1711.25	1774.67	1563.15	1718.52	1562.65	1676.35	1702.13	1501.27	1837.22	1540.94	1404.67	1209.35		Other
1019	Q12494	KCS1		175.208					183.515						143.928	192.761		179.251			202.271	206.017		324.88			202.334			Other
1020	Q86ZR7	YKL033W-A	6839.51	6513.92	7485.17	9434.46	9149.82	8943.67	15590.1	17628.2	16265	17130.6	17062.6	17767.3	10235.2	13683	12638	13459.4	13850.6	13869.4	13316.4	13280.6	11755.4	10414.1	10079.8	10206.7	10163.8	7495.78	10056.1	Other
1021	P00729	PRC1	33515.1	36707.3	35752.2	30106.4	30142	31643.4	23797.7	24687.9	25318.1	20180.3	23723.3		9785.99	12677.7				8757.62	8021.42	7284.53	8395.36		6628.53	6360.08	5308.07			ER
1022	P03871	REP1	3817.94	3437.39	3395.88	4451.64	4439.5	4432.79	5238.06	5583.13	4839	5355.89	7006.38	7375.28	4305.27	6028.03	6292.24	5762.27	6162.87	6283.34	6588.62	7447.81	7084.03	4164.13	4548.57	4239.13	6015.73	4569.5	7617.91	Transcription
1023	P03874	CBP2	721.962	769.37	774.432	788.351	713.975	842.575	1486.2	1282.38	1102.34	1155.56	1316.27	1396.87	490.216	1046.18		1476.28	1198.67	1535.52	1638.55	1719.91	1402.54	1514.4	1272.32	1564.44	1557.83	1101.84	1547.01	Mitochodria
1024	P04449	RPL24A	255133	268529	265561	283905	283102	319042	385683	381597	398148	428455	472444	514639	298465	421106	421801	446657	462805	470082	468800	501998	469570	533189	531973	506761	485645	405595	605107	Tanslation
1025	P05756	RPS13	142378	150496	153651	152813	158612	170314	203668	214579	208782	227997	260176	289979	152518	229420	228314	236335	246234	252944	266942	290192	266978	334623	321434	307483	304106	252556	363673	Tanslation
1026	P07253	CBP6	12435.8	13030.6	12834.4	12346.6	12833.9	12868.4	17180.2	17362.8	16401.4	18508.9	20683.3	20924.5	12407.7	19493.1	17794.5	20658.8	21002.9	20564.8	22974.8	29168.6	24270.7	27791	27323.3	25571.2	23207.2	18279.2	25125.5	Mitochodria
1027	P07283	SEC53	22545.1	23372.3	23646.8	25392.5	25313.5	27782.9	49135.3	48874.5	45499.3	51418.4	57936.8	61914.9	35254.8	51169.4	46907.7	52708.3	53071.2	55854.1	53213.6	55615.7	54426.8	56726.2	55130.1	54378.1	48964.3	40607.8	60191.8	Other
1028	P07560	SEC4	6728.62	6545.06	6978.94	7699.27	6994.95	6559.91	7881.74	8068.81	7386.71	7054.45	8109.88	9535.03	4451.19	6147.19	6577.67	5577.8	5398.07	6772.58	6261.8	5041.98	6056.03	5703.39	6389.34	5328.92	4781.18	4395.85	5744.28	ER
1029	P07703	RPC40	8592.62	8463.05	9545.09	9522.45	9242	10076.3	12919.4	13266.7	13130.8	13766.8	14799.4	15423.6	9371.8	14338.6	13628	14218.2	15089.3	15364.1	14020.2	13945.7	15075.7	15643.5	15824.1	15808.9	14422.8	12133.3	19109.9	Transcription
1030	P08018	PBS2	1350.64	1430.84	1498.23	1742.26		1493.49	2381.79	1971.04	1660.39	1979.83		2618.5	1595.89		1557.03	1676.07	1905.15	1602.58	1799.29	2672.78	1592.66	2063.38	2408.65	1934.74	2497.36	1840.89	2086.48	Other
1031	P09457	ATP5	91016.1	91839	91650.4	102508	113392	108187	147596	144497	140704	160363	170589	175702	107189	164110	156448	167384	174349	171121	174863	188385	174048	169815	171833	154999	135208	107313	149440	Mitochodria
1032	P0CX85:P0CX84	RPL35B	238819	253756	252729	268452	264133	281577	397836	357535	346581	393913	448071	532548	287031	416603	389637	441977	444580	459744	439448	482312	451755	511598	514792	492969	464751	386173	583409	Tanslation
1033	P10849	MTF2	920.173	753.702	997.639	827.442	964.551	1282.99	1294.46	1446.25	1327.45	1259.89	1370.23	1821.98	1090.81	1188.14	1515.28	1528.13	1318.64	1618.95	1362.82	1391.04	1517.27	1213.62	1207.09	1315.52	1211.92	915.959	1635.59	Mitochodria
1034	P14306	TFS1	116829	120088	127995	107017	101884	115065	85427	88355.1	91713.2	66350.5	61935.7	68052.4	23051.3	23916.9	25522.4	10735.7	10473	10562.1	8690.18	9037.7	9087.89	6554.1	7106.66	8229.79	5744.95	3126.38	6320.56	Other
1035	P14922	CYC8	5895.76	3882.68	6104.68	4794.75	6488.59	6627.31	7041.16	9183.31	7692.51	8154.06	9611.08	8684.39	5792.75	8333.47	8013.87	8692.41	8452.56	8286.31	6732.33	8712.03	8389.82	9832.72	6884.78	7929.33	7020.01	6244.09	8632.08	Transcription
1036	P15179	MSD1		1029.13				1651.3		1516.8			1427.12					1763.57		1646.92	2099.37	2298.2	1838.58		1835.93	1985.89	1537.73			Mitochodria
1037	P15202	CTA1	42199.7	42104.9	41812.7	36926.6	37915.8	36395.1	30481.3	31878	32939.2	26166.2	24400.8	27982.6	17260	23644.4	22240.4	16397.2	17522.6	17620.3	11581.9	5871.97	11625.7	2045.57	2177.03	1705.72	972.709			lipid metabolism
1038	P15454	GUK1	45908.4	42159.1	42783.7	40962.3	42143.6	42636.9	50224.9	50939.8	48569.2	56599.7	59005.3	63271.1	37282.2	57006	50807.7	57111.6	57419.4	56736.8	56469.7	59627.6	56076.5	63120.5	61514.9	57846.6	57095.4	43867.1	65967.2	Nucleotides
1039	P15496	IDI1	10002.9	9764.75	10370.7	10738.5	10566.2	11128.5	16135.5	16512.6	15585.5	17672.2	19150.7	18495.5	11168.9	16878.9	15666.1	15819.5	16890.7	15968.1	15149.6	16718.4	15368.2	16744.4	17822.8	16009.8	15827.5	12732.6	18360.1	Other
1040	P15700	URA6	10762.5	11927.2	12017.8	13950.5	13744.1	13139.8	16709.1	17456.3	16413.4	17859.9	20513.2	19349.9	12497.1	18230.4	16359.6	19492.9	19678.6	18235.9	19224.5	18351.7	18151.6	18629.6	18389.7	17136.5	15412.9	13219.7	19359.1	Nucleotides
1041	P15873	POL30	11156.9	9821.47	8564.51	11268.8	10716.2	9116.83	14358.4	11174.1	12287	13724.3	13580.2	16941.7	8943.86	10847.3	12480.2	11993.2	9688.58	12030.6	13012.9	10839.9	11273.8	11532.3	9728.19	11555	10272.5	7355.85	12402.8	Stress
1042	P17157	PHO85	4302.15	3932.39	6379.25	4736.05	4604.16	4533.54	5518.32	3950.4	5403.32	5917.34	6594.22	6943.84	3675.1	5704.1	5658.73	5138.02	4995.69	5922.83	5219.32	4480.21	5457.88	5086.67	4620.33	5426.82	4241.8	3508.71	6875.07	Other
1043	P19659	GAL11	69.8622	123.147		86.2028	75.5083	120.852	168.915	85.011		100.287		165.694	72.68			98.2076		251.81		64.0393		128.554	175.309			41.2212		Transcription
1044	P20049	TYR1	3782.67	3182.31	3401.53	3140	2831.29	3188.87	4033.77	3739.42	3684.18	4116.25	3865.42	4214.06	2206.79	2437.47		2672.67	2392.87	3167.87	2639.01	2150.94	2615.68	2815.46	2617.12	2561.43	2738.04	1828.95	3073.1	AminoAcid
1045	P20051	URA4	8765.49	8178.2	8677.38	7905.02	8004.71	8083.53	10049.8	10131.8	8894.42	9660.86	10895.6	10523.9	6712.36	9038.32	9007.67	8766.92	8455.1	9031.28	9035.13	7950.24	8679.96	8288.79	7922.13	7979.73	7567.14	6316.83	9652.02	Nucleotides
1046	P22135	ATP12	2438.59	2079.52	2267.77	2704.49	2448.53		4686.69	4063.22	3435.65	4824.79	5854.24	7275.67	3294.48	4610.87	4843.08	6372.7	6205.77	6096.99	6868.8	7200.74	6086.27	7448.45	6944.46	7325.04	6477.03	5661.11	6996.54	Mitochodria
1047	P23644	TOM40	28378.9	29211.1	30927.1	29531.8	31314.6	32400.2	41090.6	42662.7	39156.3	45268.7	47161.1	51379.2	31526.5	44759.9	39882.3	51475.2	51183	51619.2	53178.8	58161	56251.3	54293.4	55472.6	51604.6	43326.8	39676.9	52149.1	Mitochodria
1048	P24521	ERG8	5330.82	5332.24	5008.49	5684.66	5752.3	5279.97	7960.71	7977.53	7980.25	8346.57	9121.2	9328.35	4930.71	6720.58	6689.19	6006.57	6136.38	5848.3	5658.3	6301.1	5954.11	6026.19	6525.61	6629.82	5378.26	3846.57	6062.71	lipid metabolism
1049	P24783	DBP2	7888.87	7831.13	8157.09	9610.61	10575.6	10630.4	17737.5	17235.2	15744.8	19519.8	22595.4	24543.2	15282.1	23677.5	21452.2	23131.2	26053.7	25603.3	24099.3	26347.1	25076.9	30236.7	30759.2	30742.1	29683.8	25728.3	39195.9	Mitochodria
1050	P25037	UBP1	1796.19	2337.89	2089.7	1883.27	2412.68	2091.96	2215.32	2628.48	2317.66	1964.46	1997.65	2250.47	1451.53	2333.55	2568.58	2042.78	2092.89	2493.3	2498.04	2315.5	2609.91	2718.39	3523.91	2664.54	2705.43	1645.84	3146.35	ER
1051	P25293	NAP1	8270.6	8230.37	7875.88	8266.91	8816.23	8473.29	10083.4	10056	9990.01	10119.3	12577.7	10549.6	7145.81	10125.9	9502.05	10212.7	10201.2	9976.59	9537.1	9640.62	9198.33	10216	10640.6	10274.9	9599.1	7332.49	11361.6	Other
1052	P27476	NSR1	27320.3	30242.4	29918	34715.2	35346.4	37197.6	40999.5	42483.8	41421.1	45750.5	48995.6	50988.3	31035.9	46506.1	41630.4	43567.3	48570	44390.9	45064.6	46813.3	46664.2	48088.1	49039.2	39008.3	46351.7	39505.7	44193.6	Mitochodria
1053	P28321	YJU3	7934.19	8203.4	8201.12	8156.99	8862.87	8162.16	10063.9	10283.4	9779.01	10537.1	10972.3	11212.4	6716.56	10115.6	9301.76	8966.95	9235.59	8899.73	9132.48	10346	9865.39	10194.8	10162.6	9962.07	9223.75	6726.03	9461.93	ER
1054	P28625	YIM1	9490.96	8824.54	8253.86	7998.98	7097.69	8390.82	6193.75	6838.45	5647.31	5318.37	4792.85	3867.19	3098.09	3903.48			4559.64	3865.68	3234.23	3137.57	3486.34	2371.47	2843.21	2573.95	1880.84	2121.71		ER
1055	P29311	BMH1	61993.1	61612.1	63321.6	62909.9	69552.5	66183.3	65976.8	66709.3	62991.1	72286.9	82012.4	76106.4	41826.5	59503.3	56615.4	56154.5	56793.9	58813	55013.1	57646.2	56627.4	55859.4	57421.7	54340	48306.9	39890.2	56642.5	Other
1056	P29366	BEM1	862.955	817.632	1257.55	1084.3	516.151	1381.24	1479.77	1361.69	1427.69	297.432	677.171	1652.47	1091.12	1061.73		1445.96	681.932	1608.36	911.956	1562.72	1499.57	1500.33	1299.12	1557.35	517.923	1112.3	1468.73	Other
1057	P29478	SEC65	6038.82	6566.37	5353.88	6148.73	5445.13	6000.94	8246.61	8006.45	7182.65	8686.33	9727.86	10512.9	5626.16	8619.97	8180.38	8300.49	8780.72	8551.45	7901.5	8874.75	8473.74	8662.43	7901.54	8132.13	7319.8	6321.09	8859.34	Other
1058	P30619	SEC1	2984.34	2809.38	3275.3	2537.01	2675.13	2367.33	3039.92	2356.98	2337.54	2589.51	2988.15	2335.16	1628.56	2009.34	3754.14	1665.65	1703.6	1909.87	1914.34	1863.97	1775.42	2357.94	2143.12	1768.66	1836.08	1471.66		Other
1059	P31373	CYS3	100280	83477.7	90990.5	98807.5	101198	96179.5	114245	121386	112036	131358	146317	150522	93060.8	128595	125769	139083	141606	148629	149879	146836	152950	155120	151447	147654	142131	113000	191173	AminoAcid
1060	P31380	FUN30																	286.285								257.621			Mitochodria
1061	P32335	MSS51	6797.4	6213.73	6274.99	6336	6237.15	6769.1	9146.2	9398.68	9358.51	9439.7	10447	10335	6561.73	9586.65	9156.8	9393.09	8634.31	9940.25	10635	11665.7	10209.8	11231.5	10043.1	10571.3	9007.71	6105.35	10408.9	Mitochodria
1062	P32563	VPH1	5199.05	5051.23	5329	5114.57	4739.6	5104.79	5419.25	5206.5	5525.08	4216.78	5449.77	5572.1	2517.32	3570.6	3662.03	3388.86	3679.25	4123.07	3002.52	3331.88	3099.41	3258.61	3338.01	3018.18	2820.32	2955.52	4115.97	Energy
1063	P32604	FBP26	5552.06	5214.7	5688.68	5102.03	5325.93	5266.27	4330.38	4524.02	4370.36	3764.03	3693.54	4240.29	2356.74	3144.14	2873.44	2221.64	3609.58	3023.44	2320.42	2543.84	2857.47	3522.83		2249.27	1789.45			Stress
1064	P32794	AFG2	1673.39	1152	1852.26	1707.07	2293.9	1698.45	1946.55	2294.97	2214.52	2326.71	2906.18	3079.69	2021.3	1418.75	1919.11	2195.46	1850.38	2418.84	3047.46	2503.66	2800.2	2553.52	2807.59	2792.09	2419.26	1102.52	2646.77	Other
1065	P33332	SEC3													157.188													111.449		ER
1066	P33759	MRPS5	3214.4	2870.41	3911	4285.29	4537.44	4346.45	7588.79	8269.64	7594.98	8551.95	9617.22	9896.3	6222.43	8924.92	8995.9	9877.87	10512.4	9432.53	11001.2	12700.8	11203.2	13191.1	12696	11360.3	10770.6	9210.05	12675.9	Mitochodria
1067	P33775	PMT1	1288.7	1158.28	1104.9	1601.31	1343.07	1316.32	2001.88	1820.65	1851.67	1905.96	2292.6	2775.09	1576.49	1837.73	2002.9	1781.07	1851.25	1938.27	1825.79	2034.21	1837.19	1899.36	2181.04	1787.3	1689.38	1622.9	1895.7	ER
1068	P34167	TIF3	27996.7	29031.9	29669.5	29930.4	27976.1	30115.4	34065.7	34871.5	32491.7	36235.7	39815.7	40415.8	24844.7	36655.3	34988.6	37559	38565.4	39465.5	39508.3	41575.1	39342.4	45018.4	44100.9	42804.6	42176.3	33941.1	50637.1	Tanslation
1069	P34241	URB1		140.131		130.187	145.42				218.594	219.278	375.647		132.483		207.829	317.017	365.447	248.309	290.434	299.876	255.751	291.581		306.284		211.96	359.02	Other
1070	P35729	NUP120	1618.79		1823.2	1467.82	1465.36												971.62			1079.05								Other
1071	P36015	YKT6	13446.8	13345.3	12843.7	13376.8	13461.4	13494.5	13925.5	14981	13031.4	13885.6	18129.4	17269	9683.38	14160.4	9482.73	11738.7	15069.6	12397.3	12141.4	14148.9	13923.7	13118.9	13435.2	10472.5	10190.1	8944.08	12423.3	Mitochodria
1072	P36101	YKL027W	2225.43	1699.61	2332.16	2637.71	2891.5	2689.41	3966.06	4168.69	3776.51	4234.64	4774.8	5014.79	2707.61	4004.47	4171.39	4339.76	4609.52	4476.94	3959.08	3908.37	3925.87	4518.34	3819.29	4186.52	3718.58	3094.43	4538.1	Mitochodria
1073	P36519	MRPL7	2662.76	3032.09	2839.26	2735.15	3795.14	3089.04	4449.34	5844.85	4693.13	5215.17	5819.3	5846.6	3602.78	6236.92	6010.05	6229.52	6546.61	6665.27	7352.98	6098.06	7816.53	7346.17	7826.9	7322.51	6585.08	5043.42	7783.52	Mitochodria
1074	P36521	MRPL11	3806.55	3710.66	3879.49	4582.43	4471.02	4586.35	6794.89	7791.92	6928.29	8536.83	10252.5	10003.1	6041.11	9427.12	8671.82	10413.5	11260.2	10569.3	12141.7	13810.8	12308.9	14877.4	14484.4	13702	13420.6	10416.9	14515.2	Mitochodria
1075	P38013	AHP1	285447	286708	301371	271310	245469	266398	186791	191717	201128	130205	122699	130925	42946.8	44852.9	49333.7	29049.3	27264.8	32243.8	32144.7	36207.4	38643.1	39487.4	39312.5	40299.6	36792.6	30911.2	53465.2	Other
1076	P38149	DUG2	949.417				530.729			911.728		867.297					782.112		722.196	1648.92			1607.5			2075.09	800.784			Other
1077	P38152	CTP1	8182.8	7578.44	7841.74	10769.8	10796	9728.49	15073.3	14440.6	12085.6	15412.1	16302	16603.3	10598.5	12570.1	14306.6	14375.5	14446	16428.2	15849	13808.4	16353.5	13033.2	11351.7	12521.3	10816.3	8703	17340.5	Mitochodria
1078	P38197	YBL036C	6750.4	6315.63	6990.01	6153.1	6044.53	6404.98	7278.86	7416.97	6939.61	7464.74	8483.11	8754.6	4865.22	6422.68	6177.46	6253.36	6332.41	6460.6	6360.51	6646.51	6036.65	6879.02	6712.86	6139.28	6052.76	4849.06	7373.54	Other
1079	P38297	FZO1													244.366										486.053					Mitochodria
1080	P38626	CBR1	17081.1	15304.4	17628.1	13132.1	15293.6	14972.6	17812.1	17325.6	17311.2	17554.6	19500.9	20745.3	11820.4	15905	16561.1	14223.9	15513.7	16713.9	15639.8	16258.5	14601.6	14114.6	15789.8	13575.9	12176.5	11326.6	14959.6	Mitochodria
1081	P38689	PRS3	12408.1	11238.3	11601.3	11656.8	12019.4	12563.3	17013.5	16577.5	15907.3	19848.2	20057.7	21313.7	14335.4	18874.8	19013.1	20428.3	20273.8	22374.1	20739.6	19486.5	20469.1	21345.4	19683.3	20378	18501.3	14212.7	23886	AminoAcid
1082	P38701	RPS20	179075	184599	207167	211801	188208	190253	279723	270785	272318	269708	320730	401650	208581	294991	283939	308441	315244	329763	317085	357279	337286	397425	387140	377541	359696	298833	457034	Tanslation
1083	P38716	YHR112C	5992.04	5531.34	4383.83	4766.41	5505	4404.48	4232.52	6705.62	6624.68	5590.33	5315.03	4840.52	3181.98	4884.79		4257.7	5022.55	5764.53	5031.44	6076.73	5650.34	6264.34	5371.58	5929.52	6270.01	4719.56	7303.19	Other
1084	P38765	YHI9	7834.31	8410.45	8053.82	9314.21	10216.4	9874.27	14348.5	14963.9	14647.9	14635.4	15510.2	16526.2	8043.76	10999.2	9791.46	8084.75	7932.22	7830.53	6693.58	6562.19	6880.31	6827.59	6696.55	7597.46	6399.29	5057.83	7878.33	Other
1085	P38771	RRF1	8545.49	8858.41	8907.34	7748.85	8158.95	7911.86	9999.48	10546.1	9741.08	11996.8	12927.7	12583.9	7667.19	11172.7	10694.4	11438.4	12747.1	11661.2	13216.4	15138.9	14168.9	12539.1	12827	12224.4	10990	8320.44	11922.8	Mitochodria
1086	P38798	NMD2	28.905		33.2545	34.6935	25.7661	25.6444				34.3426			18.1627						31.9303	20.7604	20.8826		25.6205	21.6388				Other
1087	P39013	END3	3912.84	5096.18	4191.61	3170.67	4368.17	4706.88		5220.79	3091.11	4569	5386.75		2845.09	3902.05		5332.68		4089.25	3831.8	3859.52	4036.1		4185.68	4108.14	3523.7			Other
1088	P39714	BDH1	53907	55907.1	58533.7	46416.6	45804	48695.9	44956	45188.1	43321.7	48087	51675.1	54797.3	35028.5	55401.5	51441.8	62512.4	68256	69329.8	78105.3	74690	74851.3	60583.9	57872.5	53703.4	46114	36089.5	48746.7	Other
1089	P39969	BOI2	78.9687			350.81		269.74			307.108	330.346		309.215	190.53					247.672	263.36	230.738	232.646		209.574					Stress
1090	P39998	EDC3	3090.28	3534.83	3266.16	3552.56	3439.75	3238.42	4541.26	4603.65	4056.47	4640.24	5176.54	6072.3	3580.95	4398.08	4121.81	4157.42	3819.59	5072.64	4219.62	4294.04	4281.45	4203.04	4085.97	4436.86	3922.08	2894.42	4678.77	Other
1091	P40029	MXR1	50910.1	53142.3	58331.6	52354.5	48613.3	51465.3	45896.4	50538.4	49462.6	50373.5	50186.1	52428.1	29540.1	42223.4	38708.3	40343.9	42494.6	43631.9	40376.2	37157	40388.8	34558.2	36178.1	34216	30099	25099.5	36889.9	Stress
1092	P40087	DDI1	13222.3	13785.1	14549.6	12295.6	13027.7	13328	13825.1	15399.1	12525.1	14799.6	15019	16110.4	9391.96	13249.7	12046.3	10672.4	11683.9	11713.1	10485.9	9870.43	10455.6	8837.8	8871.1	9073.46	6528.94	6217.19	8761.78	Other
1093	P40093	YER156C	14513.5	13745.8	15518.8	14655.1	14216.1	15744.7	21304.5	20669.5	20912.6	22608.9	24461.7	27237.8	17188.5	24564.9	24091.6	26413	26492.8	26103.2	25183.4	27176.1	26008.3	27097.6	26300.3	25162.5	24075.7	19315.9	27338.9	Chaperon
1094	P40106	HOR2	3352.81	3578.66	3617.85	4903.05	4782.67	4880.75	5455.69	5154.51	5812.2	4765.83	4314.66	4867.49	2122.49	2142.03	2193.48	1382.77	1066.27	1861.28	1975.37	1677.73	1842.14	3090.11	2896.05	3202.06	3582.69	2746.04	5309.82	lipid metabolism
1095	P40212	RPL13B	209016	232694	245234	245166	254503	269406	346307	379500	354201	369124	430075	476330	259952	409080	366783	404908	423513	429940	429067	455117	425454	490752	481634	469200	450018	367275	553561	Tanslation
1096	P40343	VPS27	634.014	611.981	621.485	536.393	577.049		563.787	558.664	557.969	657.878		636.141		523.778		394.735	475.006		403.474	454.187	422.502			344.149	342.006			Other
1097	P40363	YJL068C	6274.14	6595.38	5015.83	5653.53	4691.93	6081.15	5038.46	4392.77	5153.28	5175.75	5595.79	5962.89	3200.91	4147.41	4410.26	4112.64	4282.92	3854.71	3394.22	3894.7	3564.02	3725.57	3287.98	3471.98	3125.29	2426.29	3599.89	Other
1098	P40485	SLM1	3475.17	3654.64	3358.38	3593.12	3175.71	2909.86	3001	4769.7	3109.74	2158.6	2430.78	3594.14	1562.9	2048.89		1584.75	1857.27	2540.46	2353.11	1429.99	1868.63	1900.81	1624.49	1508.7	1413.98	1161.62	1887.57	Mitochodria
1099	P40580	IRC24	22345.3	22345.8	22602.9	18068.2	17175.8	18567.6	17668.7	16873.2	16383.5	16282.2	16679	17254.7	9268.41	11876.6	11900.9	10132.7	11446	10673.9	9716.5	9840.24	9699.72	9216.02	9761.6	9427.07	8856.41	6239.36	9954.42	Other
1100	P40959	MVP1	1015.84		1421.11	1076.79	1056.56	803.151	1184.59	1199.1	1259.75	911.079	953.045	1267.63	993.682	907.137	914.98	850.336	971.478	1303.28	1033.18	992.536		928.947	723.343	1121.88	1068.72	624.959	939.078	Other
1101	P42940	CIR1	17519.8	16143.4	16049	16437	16646.9	17552.4	22108	23336.5	21903.9	25438.7	27947.6	28357.5	17432.1	25978.5	23808.2	27440	27724.8	27338.5	26832.2	29386.9	27530.3	29148.8	29280.3	27550.6	25413.9	20367.7	27160.2	Mitochodria
1102	P43594	AIM13	11457.7	12252.8	11598.8	13776.5	14523	14591.5	19946.3	20467.6	19074	22338.1	25707.9	26091.2	15897	25435.4	23095.1	26803.5	28348	28368	30010	32882.8	30893.4	29735.2	31761.9	27384	24080.6	17988.5	23745.6	Mitochodria
1103	P43635	CIT3	16947.5	16408.7	15245.1	14118.2	13672.8	11776.4	11642.6	12290.7	9929.97	10136.9	11246.9	12566.8	5993.15	8510.24	8132.84	9163.58	8279.72	8611.77	6718		6420.88							AminoAcid
1104	P46151	MET12	2406.27	2538.11	2603.47	2984	2932.81	2801.75	3454.32	4072.24	3604.96	3688.54	4085.95	4220.62	2659.8	3384.15	3441.2	3331.71	3439.41	3775.06	3453.26	3586.92	3392.68	3594.55	3472.07	3476.41	3109.6	2291.87	3760.32	Other
1105	P47025	MDV1	709.643	586.012	690.947	640.521				1146.15					974.181	1254.54		966.054		1665.14	1882.64	1424.4		2017.17	1625.59		1282.25	1774.45		Mitochodria
1106	P47045	TIM54	1053.45	1113.48	789.375	1111.39	1238.27	1244.64	1617.74	1502.82	1317		1689.19	770.807	1109.14	1500.29			1704.15	1588.39	1776.66	2105.52	2114.32		1968.45	1837.09	1454.31		2226.04	Mitochodria
1107	P47057	SNX4	1888.94	2258.89	1932.5	1610.95		1693.2	1956.13	1765.84	2079.3	1827.79			1249.15	1412.46				1348.49	1485.2	1480.21	1271.93		1089.3	1128.5	900.499			Other
1108	P47085	YJR008W	30653	29584.6	29307.5	24341.8	24782.3	23260.2	16426.9	13381.2	16932.7	11237.5	13100	14936.2	5434.82	7303.05	7626.44	6537.08	6704.15	5562.75	5899.95	4805.29	5645.08	3649.55	3735.76	5125.72	2748.86	1607.24	1934.8	Stress
1109	P47117	ARP3	26509.8	26550.2	27109.2	27129.9	27170.8	25101.1	27650.8	30455.4	28217.2	25958.6	30063.1	32980	16988.3	23983.3	23825.8	22932.7	23457.5	23638.3	20333.7	25639.4	22095.8	22248.6	22273.4	22047.5	19011.8	15416.8	22543.7	Other
1110	P47160	ENT3	7143.05	6226.95	6962.48	7479.69	7579.65	7017.01	9446.67	10126.8	8693.89	10553.2	11316.5	10344.8	6505.29	10161.8	10007.4	8975	10369	9838.21	9513.19	10258.1	10122.8	9569.58	10335	9511.57	8920.84	7009.56	10250	Other
1111	P47164	STR2	1562.02	1651.7	1575	1706.47	1697.74	1703.36	1975.6	2171.85	2056.98	2026.2	2274.42	2185.47	1030.23	1550.38	1276.74	1121.85	1134.28	1024.2	998.167	993.071	1082.31	918.06	899.478	715.06	740.35	815.294	908.739	AminoAcid
1112	P48362	HGH1	6202.27	5894.97	5903.21	5896.7	5735.99	5586.65	7331.86	7253.89	6963.45	7179.81	7571.53	8290.8	4754.56	6367.54	6314.89	6195.13	6356.66	6906.31	6624.67	6322	6308.73	5873.19	6415.22	6659.33	5852.96	4735.66	7979.82	Other
1113	P52918	MSN5	407.932	481.545	407.465	409.206	351.494	424.103	425.805		474.903	334.235	627.494	562.241	301.805	428.981	371.816	375.328	448.558	431.121	280.538	399.723	389.734	379.081	465.086	362.573	362.99	365.239	383.728	Other
1114	P53051	IMA1		231.981					295.086															566.152			403.034	493.827		Mitochodria
1115	P53081	NIF3	12079.5	11970	11690.1	10819.6	10943.8	11652.5	11501.9	12075.5	12580.1	13383.8	12878.2	14466.7	8190.03	10683.7	10816.9	10509.6	10971	10953.1	10522.8	10840.2	10508	10437.8	10305.9	9901.11	9751.8	7499.11	11090	Mitochodria
1116	P53100	YGL185C	2427.34	2591.64	2436.41	2462.71	792.798	884.393	2233.33	1870.55	1810.71	2070.09		2260.9	585.704	1311.41	1952.81	1770.8	1833.85	2245.45	1337.3	775.801					1588.38	880.041	682.002	Other
1117	P53331	RNH70	1344.24		1270.89	1777.14	1652.34	1372.62	1930.2	2459.27	2164.41	2835.68	2884.47	3131.29	1801.52	2528.38	2317.59	2767.77	2901.49	2669.38	2504.93		2801.8	2949.04	2317.41	2416.9	2361.67	1928.37	2668.83	Translation
1118	P53551	HHO1	5402.22	6280.45	5962.43	6090.96	5924.52	6058.08	8460.83	8272.05	7931.39	9194.24	8799.64	9640.23	6183.2	9278.87	8393.27	9547.45	10528	9840.04	8207.14	7978.27	8447.2	8113.93	7935.04	7057.67	7050.81	6543.9	7713.09	Other
1119	P53878	YNL181W	1575.27	1569.48	1680.87	1565.38	1269.35	1185.1	1436.18	1481.51	1413.84	1393.86	1740.11	1763.8	1001.9	1361.95	1305.03	1061.01	1203.78	1067	1396.68	1477.1	1315.46	1056.37	1220.44	1022.65	1184.07	882.968	1171.87	ER
1120	P53893	RIA1	461.321	596.427	541.852	683.947	748.48	572.793	556.611	631.959	567.925	567.326	800.47	770.806	621.79	592.19	587.615	576.339	562.816	631.016	636.726	626.897	704.409	641.782	511.058	561.011	486.852	448.914	600.451	Other
1121	P60010	ACT1	377484	406307	409713	383966	386796	399501	416107	405474	409238	412944	485970	558431	245740	352450	351740	362302	348341	360892	361559	366471	371864	348278	344297	329180	296177	229360	339217	Stress
1122	Q02773	RPM2	224.276	213.395	211.447	261.206	215.543	221.94	368.941	228.367	181.103	280.033	348.265	172.048	95.8827	213.893	126.848	187.304	147.816	155.862	163.226	175.171	266.48	173.153	188.29	194.712		168.552	163.757	Mitochodria
1123	Q02875	SYH1	885.249	902.372	1001.59	1009.68	1155.67	990.6	1386.83	1452.38	1159.17	1586.12	1934.81	1707.75	1021.56	1358.34	1296.35	1461.45	1428.72	1242.49	1321.05	1391.2	1311.69	1477.99	1398.54	1093.06	1197.74	947.007	1244.7	Mitochodria
1124	Q02950	MRP51	3113.7	3094.4	3062.47	3285.4	3540.01	3548.75	6192.81	6900.23	6319.84	7756.71	8848.02	8209.18	5274.24	6973.07	7157.74	8137.3	8494.97	7954.08	9605.64	10588.9	9447	10637.8	10544.9	9988.54	9463.65	7583.31	11604.5	Mitochodria
1125	Q03761	TAF12	1228.48	1444	1265.51	1313.11	1514.72		1881.33	2009.92	2042.68	2031.02	2401.8	2328.87	1279.23	1760.89	1993.31	2106.36	2127.73	1711.85	2004.38	1994.78	1667.9	2043.02	1893.78	1920.43	1894.75	1444.41	2145.75	Transcription
1126	Q03774	TRM82	1126.67	1079.65	1094.44	1095.53	923.67	1033.82	1271.91	1321.37	1209.7	1230.7	1399.73	1577.57	868.474	1150.45	1274.42	1359.22	1444.07	1416.88	1336.41	1408.2	1342.04		1488.72	1539.65	1476.65	1048.2	1835.57	Other
1127	Q04304	YMR090W	16287	13959.1	18537.4	15644.6	16616.2	18978.1	10442.4	12873.5	11501.2	7418.79	6691.26	7873.3	1961.19	2969.02							1078.04		2683.79	1746.76	1384.54	918.716		Other
1128	Q04347	BUD22	180.707	244.509	166.061	299.314	210.725		286.39	248.076	262.876	368.24	360.138	300.217	233.432	334.383	293.47	313.143	346.442	339.402	357.803	436.105	361.65	360.434	326.17	336.45	477.609	258.97	385.148	Translation
1129	Q04432	HSP31	23937	24850.7	23300.5	22043	20239.1	22112.1	12411.8	13552.5	13380.2	9165.69	8464.54	8455.76	2710.33	3442.31	4060.18	3367.08	2484.99	4078.64	2837.39	3722.12	3850.05	6836.19	6158.2	7616.4	8807.18	7747.76	14377.2	Chaperon
1130	Q04599	MRPL1	4579.3	4518.83	4122.35	4726.85	4179.35	4936.17	7279.32	7782.09	6950.76	8219.19	9192.39	11372.2	5355.88	8929.37	8107.42	10237	8814.85	9416.67	10004.9	12206.2	11194.2	13599.8	12915	12583	11631.5	9393.41	12795	Mitochodria
1131	Q05584	GLO2	7986.29	7996.64	7921.5	8051.97	7640.5	8225.56	8649.77	8325.18	7579.19	8633.29	9358.79	9039.97	5014.28	6549.02	6683.25	5931.71	6323.32	6115.98	6973.39	6457.94	6479.24	6259.75	6516.26	5959.23	6217.7	5017.03	6616.59	Other
1132	Q06142	KAP95	8902.72	8836.4	9675.37	8251.77	7902.47	7781.59	8393.5	7513.31	8612.44	6842.36	8539.24	9690.88	4998.35	6548.06	6626.1	5595.99	5874.93	6718.12	6384.85	7438.59	6177.08	7136	7422.61	7353.91	6631.03	6001.01	8754.98	Other
1133	Q06252	YLR179C	6884.98	6979.35	7264.71	6283.54	6998.48	6691.51	9975.16	10454.7	9334.73	13098.5	15733.9	15354.6	10377.3	17006.3	15380.1	19977.9	21244.7	20281.5	23982.6	21945.3	23889.3	19508.3	19802.9	19033.2	17063.3	13282.2	20665.6	Other
1134	Q06493	YLH47	2102.03	2076.37	1933.92	2519.28	2455.11	1977.88	3396.33	3398.21	3116.12	3806.16	3534	3798.2	2340.77	2834.6	3214.77	2996.95	3074.07	3657.27	3495.27	2805.2	3197.59	2542.36	2704.92	2546.37	2354.65	1751.79	3136.35	Mitochodria
1135	Q07505	YDL086W	36577.5	33287.8	35026.9	28222	28212	27993	26811.7	25254.6	24769.1	26330.9	25510	28460.5	15418.5	22366.4	19739.9	21041	19052.5	20835.9	19855.5	20321.5	17545.1	16191.4	17845.9	17355.9	15199.1	12023.8	16485.4	Mitochodria
1136	Q12024	YTM1	5050.14	4840.35	4824.72	7687.13	6135.72	6341.18	8132.4	7555.23	6988.84	7921.97	8566.41	8815.07	5141.9	7738.55	7692.25	6953.04	8213.05	8512.42	6908.97	7918.74	7799.25	7320.72	8036.21	7097.17	7013.95	6822.13	9428.08	Other
1137	Q12159	YRA1	22100.9	22097.9	24528.1	22377.8	23966	24924.7	31717.5	32349.4	31906	33435.3	36550.2	37431.8	23075.5	35175.8	34161.5	35418.1	37083.4	37098.2	34186.4	36587.3	35054.1	35600.1	35393.7	33167.4	31218.5	24782.6	36895.6	Other
1138	Q12434	RDI1	19034.7	19672.4	21059.9	15900.9	16019.9	14977.7	16793.6	16441.3	13925.3	17324	20359.4	19156.7	10538.4	16424.6	13845.7	15537.5	16617.8	14603.8	13930.1	13305.5	13345.8	12102.5	12734.5	11911.4	10363.5	8060.37	12347.1	Other
1139	Q12690	RPL13A	9746.43	10732.9	10754.2	8982.83	10024.1	9763.77	12019.1	12488.6	11732.7	14177.5	15053.9	15176.8	9532.93	14235.6	13212.6	15143.3	15905.8	15591.9	16920.5	18501.1	17233.4	20563	20532.2	20098.4	20459.3	16397.1	25357.5	Tanslation
1140	Q92331	VPS5	656.309	677.239		655.099	694.244	707.162		150.974	678.581	764.82	916.219			733.838	667.049		737.367		592.893			689.346		634.845	662.487		681.461	Other
1141	Q99257	MEX67	2839.64	2475.4	2973.29	2838.07	3043.02	3015.18	3586.7	3762.24	3030.43	3759.25	5209.53	4470.94	2493.23	3680.4	3284.5	3566.24	3931.97	3816.73	4291.32	3636.6	3708.45	4122.62	4727.47	4385.5	4014.93	3672.65	5690.23	Other
1142	P04819-2:P04819	CDC9	865.699		825.013			612.55		1397.47	920.225			1582.53			738.346			977.539	1093.92	1262.9	1227.49	1203.85		1174.24	1047.99	944.598	972.142	Stress
1143	P05740	RPL17A	207883	214732	210423	226624	246204	239957	314518	324806	308283	351624	386194	395893	238247	363121	343973	377457	396924	401247	391752	426045	402269	465368	458390	448904	417090	346377	534148	Tanslation
1144	P06785	CDC21	2576.12	2543.47	2378.31	2872.87	3346.38	3196.9	5094.32	5252.59	4999.86	5642.87	6538.2	7318.07	3901.9	6074.41	6338.79	5910.73	5955.99	6351.14	5493.65	5873.4	5387.66	6656.31	6441.97	5727.62	5760.2	3851.63	7055.52	Nucleotides
1145	P07236	MST1		394.713	438.439	472.686			735.876		713.862	951.941		1010.1	451.521	714.397				757.882	705.184		1036.61	1101.8		1066.99	822.161	768.64	1584.95	Mitochodria
1146	P07258	CPA1	6377.86	9817.22	4443.82	4126.26	19856.1	5091.92	8308.85	9449.92	7568.67	9604.24	12952.1	12024.8	8297.03	12885.7	12512.8	16938.6	17248.3	19284	17738.8	16443.4	18977.3	20304	19724.9	20497.5	20832.3	17567.8	30035.9	Nucleotides
1147	P08067	RIP1	15477	15486.4	15160.7	16927.5	17745.9	16975.3	21326.9	22009.2	20940.5	22361.5	25421.2	29071.2	15412	22093.2	21907.2	25124.4	28679.8	25993.4	28357.2	31444.5	28292	31277	30272.3	27158	24709.8	20643.3	27832.2	Mitochodria
1148	P0C2H6:P0C2H7	RPL27A	260763	265520	281447	313451	285047	302230	388247	405659	379378	443123	494039	513145	303592	427125	430862	445046	486850	490788	505317	527483	505100	575707	565211	556452	516669	431885	645239	Tanslation
1149	P10823	GPA2	4213.04	4242.24	4006.43	3864.26	3543.52	3608.67	3642.84	3469.39	3193.52	2932.48	3305.07	3563.65	1623.39	2102.23	1948.04	1715.1	1739.05	1725.56	1550.12	1660.56	1510.53	1681.95	1534.17	1406.57	1277.76	942.48	1310.47	Mitochodria
1150	P15790	CKA1	2555.75	2287.88		2312.28	2039.57	2453	2760.85	2290.14		2710.83	2342.63	2891.83	1946.64	2664.9		2286.52	2415.73		2343	2784.21	2498.15	3068.05	2903.18	2878.49	2110.97			Stress
1151	P20434	RPB5	14756.2	15877.5	16417.8	14436.1	15135.1	15269.9	18477.1	19837.9	18090.4	19986	22060.1	22547.9	13818.3	20750.4	19801.1	21403	22165.7	22137.7	21519.3	20366.2	21980.8	21828.7	22805.3	21153.2	20908	15821.1	24369.8	Transcription
1152	P21771	MRPS28	3562.92	3935.32	3509.56	4071.83	4499.63	4117.14	7312.69	7740.72	6439.99	8163.59	9185.33	9189.96	5377.04	9124.9	7719.76	10206.5	9188.25	8982.91	10247.4	12125.9	10428.2	11899.4	12447.5	11046.8	11164.7	8351.1	12023.9	Mitochodria
1153	P22217	TRX1	65342.4	74961	68218.8	69966.5	66219.9	67197.1	89094.3	94225.9	84600.9	96357	120081	102959	64156.9	87267.4	85691.6	93649.7	99058.5	104923	95468	100382	98139.2	99980.8	100946	97693.9	87694.3	69709.1	98427.6	Stress
1154	P22353	MRPL8	7501.14	8669.78	8857.45	8023.85	9468.3	10158.8	14242.8	16799.2	16184.7	17281.3	19363.6	21135.7	11115.8	17406.5	18395.8	19133.4	22089.3	23809.8	21631.1	24368.1	22970.1	28966.4	25564	27794.1	24817.9	20104.5	28205.2	Mitochodria
1155	P22696	ESS1	15241.1	15411.7	15578.7	14205.2	14208.8	14771	15902.7	16573.8	16730.7	16619	17247.8	18697.6	9712.67	14149.4	14750.8	14708.8	15234.9	14801.9	13926	14568.7	13785.7	14111.9	13623	12802	11700.6	9022.01	13818.7	Other
1156	P22943	HSP12	638729	665394	715653	651147	567299	653752	368912	355713	410992	251035	218708	212197	51710.6	40388.2	42724.5	7668.6	6479.56	7461.76	6169.81	9993.19	6879.77	9492.56	8861.12	9437.2	6422.28	4738.63	12766.4	Chaperon
1157	P23287	CNA1	2421.12	2706.44	2399.8	2382.76	2147.05	2141.34	2346.4	2151.27	2197.47	2228.67	1893.11	2367.3	1078.71	1450.04	1655.3	1305.57	1358.89	1574.56	1500.47	1557.92	1368.7	1390.6	1547.03	1486.23	1525.32	916.844	1359.63	Other
1158	P23301	HYP2	553399	556786	541168	551949	593066	569130	645591	655219	661132	628425	669199	743860	387470	543692	532808	517129	530122	520398	496449	483329	501628	448663	462006	423866	392414	306939	456178	Tanslation
1159	P23638	PRE9	56106.8	57004.7	55993.2	56335	57075.4	56329.2	60955.1	64479.6	63107.3	64810.2	69806.9	69427.1	39687.6	53355.5	50260.2	49389.7	50760.9	48670.9	48193.4	50064.2	48805.5	45948.6	44889.6	42749.4	42095.6	34100.1	48332.8	Other
1160	P24000	RPL24B	16705	16605.6	17128.5	17310.7	18365.6	17848.5	25150.8	25759.5	24856	28844.6	32182.8	31909.3	20514	30288.9	28378.8	30979.5	33045.3	31989.6	31093	34343.5	34019.9	37783.7	37607.4	37519.1	34893.4	28777.4	45593.4	Tanslation
1161	P25642	IMG2	4183.08	3808.53	3849.83	4451.3	3883.31	4677.42	7810.93	7152.27	6922.44	8046.37	10386.1	9995.16	5954.84	9132.8	8518.27	9311.12	10770.7	10360.1	11419.6	12743.4	12043.6	13960.4	13018.3	12918	12267.9	9212.7	12562.2	Mitochodria
1162	P26783	RPS5	205126	199724	215524	227758	232181	220795	296818	295202	308409	342536	354508	411381	225839	320663	319498	368380	352797	376503	350693	402517	374741	467870	440018	433102	402218	342546	522843	Tanslation
1163	P26793	RAD27	1873.36	1779.94	1787.35	1715	1799.74	1692.86	2556.89	2945.35	2291.45	2892.57	3129.86	3222.12	1734.22	2381.14	2279.75	2414.14	2439.83	2461.23	2413.59	2400.95	2794.93	2313.27	2274.18	2561.21	1962.5	1680.08	2282.56	Stress
1164	P28241	IDH2	50697.6	49189.6	49829.3	55618.6	59543.4	59563.2	86997.7	96768.2	82337.8	104284	117033	120299	80210.6	122166	113024	142264	147065	148482	187282	231268	188121	227676	229102	202707	178862	142997	169769	AminoAcid
1165	P28272	URA1	15258.3	15411.8	15839.5	15142.5	15115.1	15668.7	17400	18358.6	18818.1	20697.3	22946.5	24046.3	14282.8	20319.7	21165.2	21441.4	22311.3	22843.1	22631.4	27482.7	24837.7	31158.5	30104.1	30427.9	29174.6	25164.7	38117.1	Nucleotides
1166	P32319	PEP1	968.633	571.505	986.231	837.755	1045.63	854.899	1208.76	1013.35	984.976	811.267	442.723	838.177	634.888	919.413		569.044	649.594	699.716	705.361	866.968	853.7		924.293	961.475	767.625	646.191		Other
1167	P32347	HEM12	5782.46	6482.84	6449.24	5781.5	6214.13	5696.8	7208.8	7010.76	6974.17	7569.19	7126.36	8585.56	5216.72	6581.26	6316.72	5778.33	6036.63	6920.79	6193.6	6211.59	6280.14	5783.97	6415.57	6216.42	5605.13	4543.08	6775.68	Other
1168	P32349	RPC82														624.933								645.157	1520.88					Transcription
1169	P32387	MRP20	2404.51	2697.52	2464.6	2556.64	3106.07	2931.34	4980.92	5204.64	4652.89	5617.66	6517.12	6225.36	4153.51	6255.45	5588.3	6763	7179.72	6838.71	6693.06	7534.72	6943.13	8613.36	8860.91	7589.08	7804.31	6025.27	8501.26	Mitochodria
1170	P32453	ATP11	3854.42	3934.77	4681.66	4384.76	4237.24	4405.4	6487.12	7033.86	6776.15	7605.54	7659.57	9097.16	5276.53	8133.86	7457.77	8987.17	9085.97	9144.41	9911.27	11879.2	9790.49	11438	11282.3	10685.4	10051.8	7801.44	11697.2	Mitochodria
1171	P32608	RTG2	4934.59	4937.35	4656.89	4884.83	4993	5345.66	5527.86	5681.17	5223.07	5260.69	5900.81	6087.21	3190.82	4997.23	4424.78	4250.94	4878.39	4429.05	5115.27	4395.38	4275.09	3778.75	3647.49	3610.53	3407.16	2988.62	3690.43	Other
1172	P32783	ABD1	2060.53	2465.8	2923.67	2159.84	2402.23	2442.28	2401.53	3381.09	3636.51	3289.86	3261.6	3745.75	2573.36	3129.91	2983.24	3344.79	3479.68	3440.47	3121.8	3521.52	3888.36	3410.72	3303.47	3216.28	2646.88	2210.24	3062.94	Other
1173	P32875	LIP5	1891.55	2051.78	2599.84	2705.01	2878.77	2791.64	3896.53	3921.01	3939.29	5499.95	5356.46	5774.67	3660.22	5131.81		6274.22	5604.91	6294.01	5653.63	6200.84	6566.57	7029.02	6651.25	6357.51	5758.29	4976.04	6773.08	Mitochodria
1174	P32896	PDC2	609.459	651.633		465.937	689.265	650.15	905.979	884.147	592.077	749.31		932.887		821.58		856.731		904.451	757.93	810.069	838.96	914.015	977.664	741.29		727.165		Transcription
1175	P32913	VPS17	1682.01	2268.07	2135.4	1911.94	2193.79		2380.66	2153.3	2427.13	2688.31	3406.57		1347.27	2047.94	2255.49	2341.66	1933.02	1845.22	1703.71	1552.62	2003.36	1637.23	2160.67		1947.69	1388.72	2194.7	Other
1176	P33298	RPT3	16854.5	16305.2	17076.2	16334.7	15772.4	15221.9	16490.6	16967.2	16816.5	16005.2	17790	18912	9646.4	15304.6	13562.9	12990.7	14254.3	12326.1	13366.3	13495.5	13113.7	13199.1	13354.1	11802.8	11599.2	9497.73	13447.2	Other
1177	P34247	UTP11	2470	2161.82	2557.23	2630.42	2765.02	2880.81	4095.2	3970.15	3364.22	4287.08	4439.08	4305.6	2707.9	4254.75	4246.26	4637.2	4332	4649.71	4422.34	4868.52	4477.79	5179.66	4776.64	5463.26	4701.68	4290.59	5173.89	Translation
1178	P36056	RSM22		174.532	276.225				426.45	352.504				375.01	225.701	370.764			426.489	479.715	499.606	384.67	441.617	417.311	573.558	471.729	435.299	314.88	370.851	Mitochodria
1179	P36076	CAB3	1050.57	675.061	1958.11	1127.67	1053.76	1075.39	1568.98		1303.56	1623.64	633.115	736.001	857.365	846.107	1347.59	1831.83	1673.29	1346.73	2086.75	1033.16	1625.88		2096.58	1471.29	791.35	524.589		Stress
1180	P37303	GLY1	3781.61	2978.15	7625.56	3615.94	4567.24	7271.24	6085.18	6460.37	7030.32	9086	9012.27	9628.7	6944.44	9110.56	8975.8	11613.2	12060.2	12583.8	13803.9	13917.2	15679.4	15583.1	15340.7	14303.4	15367.8	12327.9	19667	AminoAcid
1181	P38041	BOI1						122.572					67.9937		184.587	170.434	166.825		124.865	269.239	181.354	147.116					213.623	168.916		Stress
1182	P38067	UGA2	7634.3	7517.04	7619.31	6747.22	6766.98	6397.13	5438.66	5837.57	5311.12	4754.84	5133.1	4925.77	2544.76	3534.79	3064.75	2808.68	3168.25	2695.98	2624.77	2616.65	2726.33	2529.07	2477.19	2149.74	2021.42	1445.58	1797.88	Stress
1183	P38217	KAP104	1579.97	2008.9	1774.1	1774.03	1398.89	1234.81	1506.36	1955.08	1448.13	1737.61		1636.87	1157.32	1730.79	1671.68		659.349	1745.09	2045.2	2587	1749.23	1971.43	1414.07	1885.41	1416.11	1034.35		Other
1184	P38314	SDS24	20221.3	21055.4	18353.4	21789.3	19407.5	24114.2	19428.4	22762.2	25179.7	18239.2	22013.1	26205.1	10921.1	13747.6	12615.6	9207.5	8961.81	8997.8	7590.93	6141.72	7186.24	8002.07	4845.55	3782.74	2981.67	3081.64	4359.95	Other
1185	P38604	ERG7		307.061	379.442	496.091	469.619		670.67	595.473	630.145	605.931	758.769	807.362	395.95	483.937	541.258	338.564	389.378	361.456	304.875	393.258	414.725	336.017	308.6		272.57	224.32	359.698	lipid metabolism
1186	P38624	PRE3	11093.4	10879.2	11720.7	11243.4	11250.2	12430.3	12779.8	13372.5	12409.9	12971	11961.6	15041.2	7851.43	10909.9	11118.3	9573.82	10383.2	10356.2	8612.15	8467.07	10964.2	9185.61	9490.62	8304.33	8370.42	6551.9	9935.73	Other
1187	P38858	SOL3	23616.9	25039.6	23742.4	22468.9	23880.4	22698.8	28604.5	30297.9	28609.8	32189.5	34950.2	35292.4	20618.5	32176.9	28376	29723.1	30351.4	30807	28540.9	25290.2	28952.5	20869.9	21048.6	19448.6	20138.5	15871.2	24671	Energy
1188	P38861	NMD3	3902.65	3843.95	3901.41	4165.11	4549.84	4443.5	5836.14	6448.53	5739.26	6362.39	7815.02	8375.8	5027.35	6982.56	5929.52	7048.67	6830.42	7770.94	7503.17	7445.1	7609.53	7668.61	7634.83	6989.42	6980.04	5506.34	8606.07	Tanslation
1189	P38879	EGD2	83758.3	83926.4	86270.9	87492.7	89152.7	87582.2	100577	110074	104081	118454	126209	131376	80932.6	112779	107815	117011	120918	115886	116371	118360	115043	119425	115970	109553	101017	83504	122102	Tanslation
1190	P39940	RSP5	9670.2	9255.71	8843.63	9241.52	9115.34	9580.67	10200.7	11599.7	10823.8	10680.9	10644.6	12960.2	7060.09	10185.9	9788.36	9483.4	9532.11	9685.11	10033.7	10048.3	9384.14	10714.5	10311.7	8598.69	9475.81	7119.73	10651.9	Mitochodria
1191	P40007	NOP16	2394.42	2461.92	2413.53	2727.97	3181.53	3040.72	5044.19	5010.16	4837.05	5765.74	7300.51	6376.5	4234.91	6330.07	5918.75	7094.14	7144.96	6313.49	7281.83	6981.23	7274.43	7320.96	7180.27	6722.22	6720.46	5491.82	8410.93	Other
1192	P40064	NUP157	274.993	234.053		347.476	304.93	271.34	472.59		344.212	247.517		277.22	184.781	111.583		196.587			199.398	219.344	261.973			228.53				Other
1193	P40165	YNL200C	8714.69	9057.14	10108.4	11455.7	8611.88	6862.83	7325.43	6429.35	7128.65	5520.09	6062.52	5744.93	2625.69	2962.7	3751.26	2343.19	2257.42	2178.31	2184.56	1585.28	1699.11	1280.88	1350.35	1460.16	1068.69		782.711	Mitochodria
1194	P40302	PRE5	49135.2	47361.9	48523.7	45754.4	46939.7	46169.6	53159.5	52884.8	51445.4	51595.8	55223.6	60906.8	32481.6	44639.1	42025.1	43558.5	43614.8	41587.2	37979.8	38438.5	40452.5	39625.2	37877.1	36459.5	35244.9	28512.3	43562.7	Other
1195	P40340	YTA7	284.328	211.131	251.557	299.325			282.259	307.719		271.025	364.748		214.431	365.055	278.11	273.236	278.638		302.905	271.932		336.517	337.292		284.84	240.077		Translation
1196	P40364	MPM1	30316.9	29867.7	29597.2	25815.3	23519.3	23428.1	19050.7	19429.3	18273.4	19177	21754.6	19429.7	11628.7	16177.8	14981.1	15405.2	16108.4	14618.5	16275.6	17015.4	15647.3	14264.8	14353.4	12403.3	10935.6	8139.2	9839.31	Mitochodria
1197	P40557	EPS1	1978.44	1442.04	1878.83	2075.42	1550.96	1671.55	1682.66	2299.37	1822.53	1401.37	1986	2453.1	1149.47	1184.48		1149.26	1304.57	1527.62	1208.43	736.551	1021.38	930.505	989.106	770.844	959.802	709.018	887.911	ER
1198	P40581	HYR1	98065.5	100003	99522.3	83293.2	75843.3	81065.9	63109.2	63131.6	67456.2	61917.1	60136.8	64455.6	33120.9	43659.5	43199.5	38672.4	37667.7	39207.3	37055.8	37513.8	36401	33240.6	34762.1	31979.3	28769.3	22294.7	32143.8	lipid metabolism
1199	P40582	GTT1	20804	19595.8	17403.4	23326.4	14401.9	18264.9	23232.9	20460.2	19490.5	16112.7	15873.8	19693.2	8629.75	6313.27	8169.99	6045.86	4645.95	6555.47	5684.49	4698.53	4966.02	4026.14	2845.65	3576.95	2645.92	1341.2	3246.36	ER
1200	P42222:P0CX11:P0CX10	ERR3	6520.87	13891.9	9572.18	9379.22	5467.28	11181.8			3912.97																			AminoAcid
1201	P42846	KRI1	2680.01	3572.61	2932.71	4012.86	3130.75	3142.49	4233.58	4338.8	4520.01	5034.94	5426.9	5308.1	3129.32	4912.08	4502.37	4752.63	5391.93	5050.53	5477	5589.79	5400.06	5259.9	4915.2	5558.84	4750.31	3768.13	5671.79	Other
1202	P43585	VTC2	485.12	520.585	608.108	613.148	698.895	868.283	841.672	742.96	824.54	706.712	993.4	1123.53	629.536	720.999	746.658	681.266	803.899	842.341	800.32	980.447	764.769	965.844	1000.46	805.847	764.869	696.756	982.51	ER
1203	P46676	SUM1	41.2634	54.9026		44.4493				58.1909					45.697					49.1305	51.1226	51.9188					66.734			Transcription
1204	P46969	RPE1	16462.8	16406	15799.7	15844.5	16331.7	16602.7	19855.2	20613.4	19951.5	22604	24470.6	25488.5	14667.3	21667.7	21257.5	22545.1	22815.1	22476.5	22735.5	22965.7	22640.6	23628.3	23969.7	23363.8	21707.5	16698.4	24224.2	AminoAcid
1205	P46990	RPL17B	29344.8	30690.4	30871.7	29959.9	30251.3	32973.9	37224.4	37281.7	37538.8	42196.5	45946.8	47483.1	30673.8	46920.2	40133.2	45291.7	44851.4	45676	46482.7	51343.9	47305.7	55451	54439.1	52309.4	50564.5	41624	62249.9	Tanslation
1206	P47103	CPR7	1415.18	1279.17	1400.12	1438.45	1265.28	1369.02	1483.62	1254.72	1400.22	1271.36	2785.35	1750.4	958.793	1022.07	1165.59	1309.88	631.51	1353.93	1332.11	1376.9	1240.96	1107.76	1235.44	1042.69	1128.03	1333.57	1426.54	Chaperon
1207	P47150	RSM7	3889.69	3937.59	3896.71	3985.74	4908.89	4572.03	7826.88	8660.73	7401.34	9612.3	11577.1	9952.56	6880.09	10980.6	10698.5	11790.2	13376.1	12534.4	13489.7	15826.5	14147.4	16592.5	16938.1	15577.2	15196.1	11713.4	16132.6	Mitochodria
1208	P49017	COQ5	1698	1450.07	1589.58	1731.7	1771.25	1366.15	2183.9	1736.05	2056.89	2430.98			1604.91	2680.9			1350.21	3858.48	3182.65	3482.45	3102.59	4236.82	3324.27	2891.23	2747.47	1275.93		Mitochodria
1209	P49954	NIT3	13542.5	13086.1	13613.3	11666.7	11546.4	12533.4	13626.1	14011.3	13847.7	15265.8	14112	15777.8	8265.62	12669.5	11920	12360.3	12450.3	12508.7	11753.4	12992.2	12553.6	15061.6	15361.7	13121.3	10961.8	9484.23	15160.4	Mitochodria
1210	P50085	PHB2	32017.8	30129.8	29558.9	31101.7	29568.1	30290.4	33660.6	32026.6	29988.5	33593.6	32516.4	37828.9	22308.5	30916.2	31077.8	35053.5	33162	35192.3	37512.2	40570.4	39045.4	40356.2	40556	38781.4	35818.7	25451.4	37636.7	Mitochodria
1211	P50094	IMD4	3659.04	1610.45				1610.29	2573.6		2517.51	1891.54			1647.08	2496.91		1825.28		2229.02	2501.97	3808.55	3375.53	3999.49	4543.33	4865.98	4396.62	3302.37	6203.28	Nucleotides
1212	P50945	AIM37	5420.36	5958.06	4949.2	5944.4	6479.05	9607.5	8477.9	9030.16	7936.26	9343.56	9897.61	10707.1	6050.3	9151.1	9208.26	9717.06	10105	10144.4	11649.1	11938.3	12699.7	10492.6	10534	10036.9	8785.98	6437.16	8716.19	Mitochodria
1213	P53008	CWH41	1698.18	1436.28	2002.53	1657.8	1188.81	1919.5	1520.1	2036.09	1923.04	1737.1			979.656	1368.53				1346.07	1346.86	750.026	1308.23		1069.73	1574.92	938.02			ER
1214	P53070	MTO1										406.572			704.99	617.829	747.192	1443.01	695.242	848.569		1472.37	1368.46	1486.57	1337.02	1479.07	1602.5	948.642	1812.94	Mitochodria
1215	P53095	DSD1	3741.85	4129.94	4120.68	4421.56	4845.46	5178.72	4866.53	4313.5	4280.24	4429.64	4581.69	4931.87	2496.31	3004.64	3088.16	2807.26	2573.62	2792.78	2254.38	2370.47	2657.37	1689.49	2165.48	1913.12	1468.06	1139.37		Other
1216	P53139	YGL108C	2697.82	3135.18	3047.85	2562.91	2539.62	2370.3	2242.15	2241.8	2175.58	1918.87	2320.77	2274.2	1381.5	1989.1	1733.66	2109.31	2037.02	1821.77	1799.25	2023.18	1624.5	1748.69	1662.64	1290.99	1510.06	829.47	1518.14	Stress
1217	P53191	PIB2	902.362	985.706	862.682	948.343	1202.09	649.127	1080.81	1193.38	1148.28	1174.16	1380.59	1240.88	867.95	1099.45	1204.28	1292.19	1509.95	1285.36	1319.94	1193.93	1243.89	1030.94	1140.31	1211.14	857.155	621.86	804.717	Mitochodria
1218	P53720	SMM1	1243.12	1351.82	1278.31	1491.35	1584.38		2021.64	2556.27	1979.22	2709.82	3052.02	2776.83	1654.96	3145.18	2670.58	2492.1	3364.05	3086.62	2540.1	3349.57	2852.73	2430.33	2605.66	2621.83	2258.86	2016.49	2886.54	Other
1219	P53723	YNR021W	7586.02	7621.5	7815.15	7862.42	7518.13	7685.63	8356.41	8907.53	7994.37	7536.22	9493.96	10060.5	5400.64	7068.58	8007.54	6962.88	7925.44	7965	6964.71	7469.58	6803.63	6949.98	7288.25	6540.61	5983.04	5613.81	7169.58	ER
1220	P53743	ESF2	644.897	677.859	885.61	797.226	776.846	869.631	847.805	833.727	1107.99	1044.22	951.319	1169.99	712.092	882.569	1144.37	1293.25	997.065	1040.78	1078.39	887.272	1061.32	1111.86	1336.61	1079.12	1088.11	919.134	1465.44	Other
1221	P53877	IPI3							2012.16	4150.13		2208.28	2614.38	2231.82	1571.53	2805.67	1953.49		2298.99	1974.82	2453.61	2928.66	2181.46	2544.14	2721.43	2067.43	2585.38	2145.6		Other
1222	Q02630	NUP116	1467.88	1670.75	1463.6	1654.21	1634.49	1402.56	1797.42	1925.2	1774.74	1744.02	1963.99	2081.47	1111.28	1651.43	1662.95	1527.45	1637.9	1590.13	1461.37	1449.88	1439.44	1475.86	1543.46	1380.44	1288.17	1002.59	1669.81	Other
1223	Q02648	TRM44	1113.04	964.078	1012.43	1019.77		1009.23	1311.18	1363.37	1215.36		1306.76	1576.05	914.255	912.67	1082.59	1221.83		1378.26	864.102	1112.58	1251.14		1353.02	1326.07	925.473	978.408	1434.12	Other
1224	Q02753	RPL21A	38498.5	28876	30952	40876.8	32016.1	33047.6	38820.9	51456.3	38153.6	44972.8	56776.4	52960.7	29746.4	45278.2	46327.8	48510.6	51765.7	53113.8	50902.4	55174.2	51622.6	58903.5	58862.8	55853.3	55410.5	44563.2	66740	Tanslation
1225	Q02908	ELP3	2496.92	2672.37	2343.73	2833.82	2293.7	2268.9	2860.51	3471.2	3588.68	4014.93	2732.04	3596.07	2128.26	2998.8		4167.08	2976.28	3273.44	3226.56	3330.5	4091.35	4222.15	6279.54	3892.27	4116.29	2926.84	5214.42	Transcription
1226	Q02979	GDE1	367.274	426.468	792.98	855.177	618.23		522.949	438.481		423.027								349		420.537								Translation
1227	Q03148	SNZ1	8052.64	8444.01	7878.09	7124.55	7129.29	7785.88	7187.27	8047.44	8340.81	5681.27	5547.74	5879.15	1865.15	1847.62	2193.71	1195.89	893.196	2018.04	1060.67	586.46	991.726	988.96	946.329	1050.29	600.518	411.603	1723.69	Other
1228	Q03153	ATP25	234.051	266.19	165.264	233.821			394.383	367.123	286.359	422.778	511.896	495.492	237.891	648.24	322.55		348.104	441.352	491.35	442.529	434.71	492.801	545.112	532.407	483.664	331.122	585.183	Mitochodria
1229	Q03529	SCS7														231.809					510.777	635.57	403.33		1043.8	969.652	962.509	348.698		ER
1230	Q04217	ECM16		134.275		200.572		197.634		318.643				127.884								283.356					306.926		348.738	Mitochodria
1231	Q04418	RBA50	712.509	556.453	716.624	757.704	806.487	691.971	982.329	903.304	671.845	1117.01		1596.19	653.234	911.095	537.362	738.928		813.133	897.735	780.15	763.294	894.742		814.811	655.87		998.022	Transcription
1232	Q05123	ARP9	2474.92	2268.74	2587.57	2476.74	2165.58	2454.14	3482.51	3375.91	3919.81		3819.14	4358.6	2388.59	3310.62		3012.21	3115.76	3272.42	3595.86	3422.38	3955.43	2973.19	2921.65	3642.68	2821.06	2616.93	3847.78	Transcription
1233	Q05905	HRI1	12862.5	11960	11826.1	11562.4	11158.8	10565.4	14521.7	16786.7	15880.6	16511.9	16207	17868.5	9545.47	13169	13304.2	13422	12690	13925.1	11675.2	13568.1	13101.3	15723.4	14348	15421.8	14357.6	11514.3	18438	Other
1234	Q06287	EMG1	6538.88	6799.44	6399.73	6513.4	6348.32	6201.35	8141.56	8372.93	7580.85	8735.88	9218.07	9195.44	5627.43	7551.57	6872.91	7549.47	8278.26	7984.07	7709.43	7607.24	7459.8	8556.19	8336.48	7573.04	7809.8	6238.21	9908.99	Other
1235	Q06385	VPS74	4127.39	4642.16	4870.43	5000.5	4443.72	4524.49	5559.26	5213.94	5122.62	6083.33	5791.86	6054.55	3546.26	3969.66	4434.69	4021.11	3632.99	4496.31	4931.34	4643.41	4265.37	3947.59	3663.75	4833.18	4074.19	2606.84	5434.93	Other
1236	Q06630	MHR1	2750.44	2311.71	2987.81	2958.7	3211.38	3061.15	5387.88	5422.22	5304	6090.59	7177.79	7047.63	4294.99	6480.38	6792.64	7166.24	8367.52	7681.58	8757.43	9379.46	8981.16	10625.6	10655.4	10784.8	9918.55	6899.63	10718.7	Transcription
1237	Q06709	REH1	3754.06	3927	4143.22	3702.88	3625.91	3535.26	4907.65	5281.8	5660.31	5359.35	5929.72	6119.03	3055.32	4718.21	4925.79	4386.97	4432.42	4786.33	4108.76	4373.69	4303.92	4446.55	4249.72	4561.59	3973.73	3272.68	5260.46	Translation
1238	Q07844	RIX7	1481.32	961.141	1107.73	1231.34	1112.88	1002.86	1571.52	1516.93	1208.77	1942.77	1804.32					1392.87	1616.67	1285.17	1413.01	1481.26	1269.95		1204.09	1123.62	1485.45	1064.33		Other
1239	Q07897	CMS1	4425.88	4434.44	4135.59	3815.3	3786.74	3354.06	3285.66	4213.03	4348.3	3417.14	4169.61	4652.27	2684.74	3919.73	3679.15	3511.54	4288.5	3651.59	3854.75	3249.3	3480.13	2872.82	2829.87	2954.67	2270.72	2288.1	3170.37	Other
1240	Q08412	CUE5	6298.02	5568.66	6268.01	4717.68	6216.54	6271.82	5268.25	4165.73	5966.4	5214.18	4528.87	6533.57	3049.6	3607.5	4127.24	3849.08	3841.22	4633.22	3669.12	2603.17	4007.12	3888.95	3649.78	3888.92	3416.97	3091.34	4902.21	Other
1241	Q08421	ETT1	4003.56	4461.67	3987.67	3916.31	4137.98	3752.96	4297.56	4212.06	4172.46	4751.36	8838.43	5198.82	2667.3	4700.29	3741.39	3239.48	3135.36	5332.14	4297.29	4352.86	4193.58	2829.85	4335.58	4639.03	4517.81	4435.76	6401.55	Other
1242	Q08926	UIP4	11732.7	6166.75	5529.98	6598.16	6344.67	5599.04	5611.63	2991.81	6413.29	3687.87	2221.88	5533.24	1804.96	1820.98			1012.46		927.713									ER
1243	Q12017	PLP2	1460.84	1564.42	1419.02	1787.71	1561.34	1632.88	2131.83	2305.43	1863.53	2541.44	2620.16	2877.65	1549.44	2460.76	2202.51	2302.52	2542.33	2385.07	2354.31	2421.17	2372.01	2558.92	2328.88	2444.09	2410.24	1766.65	2689.68	Other
1244	Q12028	APL4	312.001	383.847	502.159	378.084	357.356	476.775	427.579	710.12	489.445	399.51				491.356		394.665	348.166	476.408	445.375	406.719			378.264	422.257	301.131	279.235		Other
1245	Q12100	RTK1			448.023	588.225	598.525	821.731			518.731		635.664	671.213	325.737			539.091		634.083			722.977		456.352	776.398		391.628	609.686	Other
1246	Q12276	HER1	626.779	413.246	520.93	420.466	402.823		599.961		316.282	289.576			199.297				173.801	373.694	275.545	142.455								Mitochodria
1247	Q12285	MDY2	7337.67	7807.19	7376.13	6995.69	7284.3	7263.19	7595.65	8047.82	7691.53	8131.06	8117.63	9548.33	4931.84	6623.96	6595.68	6243.95	7239.99	6719.93	6268.55	6589.14	6196.07	6578.43	6694.41	6276.65	5940.97	4668.73	6863.07	Other
1248	Q12447	PAA1	70895.4	70590.2	72331.1	68552	69740	71406	69946.6	69407.7	67748.3	72448.3	79962.3	78173.9	48925.3	68736.9	62140.7	68521.6	69795.7	66668.3	62752	65888	64353.6	62873.7	63991.8	59793	52413.7	43217.5	59983.6	Other
1249	Q12500	AVL9	993.966	956.511	1039.23	1083.5	931.618	793.824	990.248	1007.81	1143.67	1074.82	1625.67	1267.26	762.036	1057.63	825.662	1045.48	1197.61	807.065	651.639	1161.8	920.956	1041.09	980.935		764.558	872.24	1155.55	Other
1250	Q99216	PNO1	2388.44	2482.48	2335.94	2759.08	3048.31	1622.13	3593.96	3609.37	3104.04	3856.36	5177.08	4473.73	3083.3	4055.2	4004.52	4897.19	4307.99	4368.46	4425	5078.31	3842.52	5738.11	5034.94	5276.31	5564.25	4583.49	6295.01	Other
1251	P00445	SOD1	287565	300988	311717	324696	331327	320548	300512	299240	302769	286266	299235	307088	162502	232954	214092	230060	235557	245244	270784	332749	266429	330298	335466	314548	280518	219533	312388	Mitochodria
1252	P00812	CAR1	3316.09	3244.76	3376.89	3340.02	3423.73	3247.37	3096.35	3469.41	2831	2607.3	2810.85	2924.69	1234.46	1591.14	1470.36	1351.68	1316.73	1433.33	1722.17	1815.65	1648.39	1759.12	1761.61	1622.53	1536.3	1036.5	1514.75	AminoAcid
1253	P01123	YPT1	37829.1	37719.6	41286.6	46808	45209.6	47698.5	59309	57570.8	51943.4	55137.4	65799	69179.4	36163.1	51595.9	50950.8	46574.9	55267.5	51181.1	48971	50422.3	49104	47488.8	46221.3	42878.7	38392	34432.1	45277.5	ER
1254	P05373	HEM2	30178.5	30319.3	31666.7	33016.3	33546.3	33038.9	48309.1	49001.3	43663.6	55163.9	60753.8	65801.2	39234.2	57682	53991.1	61795.7	65293.1	67543.2	76612.3	91461	72774.9	85680.9	82807.2	80242.8	69117.3	51141.2	75531.1	Other
1255	P05759	RPS31	147509	133322	158974	149671	140741	151003	173151	155514	165467	141525	179432	207014	97879.5	145065	147587	146245	149762	148855	147411	160149	155895	181197	170452	161230	144980	122148	203358	Tanslation
1256	P07280	RPS19A	219440	227935	237405	249087	260510	255136	320848	346102	319434	346179	405191	427638	241871	386590	343518	363664	375621	402652	389870	450216	420989	495912	479234	476040	457776	374427	554186	Tanslation
1257	P08465	MET2	2696.94	2856.76	2782.82	3856.6	3589.55	4027.81	5567.58	6275.28	5801.21	5442.87	6213.27	6854.92	3456.96	4801.73	4601.16	4445.24	4625.68	4506.88	4881.09	4649.32	4626.15	5022.39	4990.14	4685.2	4672.9	3639.15	5899.23	AminoAcid
1258	P09620	KEX1	227.795	227.434	276.039	243.604	268.584		361.602	378.869	384.772	436.413	358.143	427.333	304.375	265.985		315.949	342.742	493.424	288.675	368.654		421.526	349.755	275.72	317.769		342.218	Other
1259	P09733	TUB1	46921.4	46846.7	46855.9	45414.6	46164.9	47364.4	56379.9	55904.9	54164	58789.4	60519.6	67115.8	38755.4	52808.4	51341.8	51865.1	50362.1	51477.5	47141	49318.7	48053.3	48595.6	46138.6	43797.1	40672.9	32143.7	45939.1	Other
1260	P0C2H8	RPL31A	182773	197095	202353	199216	213007	219412	270196	276757	266402	304581	347456	347756	207906	323102	300207	341087	338477	332841	342935	371497	345595	398807	396328	387196	367767	303039	454303	Tanslation
1261	P0C2H9	RPL31B	15958	19431.7	18296.6	22024.2	17509.8	17798.6	22792.4	24430.3	23466	27686.9	29374.2	30849.6	17055.6	28346.8	22883.4	27945.9	29609.7	29923.3	30038.2	34834.3	28782.8	36483.3	35715.2	34901.3	32420.7	27080.1	41123.8	Tanslation
1262	P0CT04	PBI2	129076	133468	131393	144423	150027	142939	144018	141480	141844	140856	142286	144143	81289.3	117155	102309	104504	109824	109268	114804	130468	117165	104157	109300	95058.8	78158.5	57021.4	65586.8	Other
1263	P0CX24:P0CX23	RPL20B	242529	269757	243953	284174	291349	270176	368490	382216	357717	424326	460629	481524	276863	422952	394099	451321	464814	471046	466589	519094	492372	568301	554248	547730	517535	427238	646973	Tanslation
1264	P0CX32:P0CX31	RPS24B	299965	313239	345832	339053	338711	386512	444350	466891	444251	512470	527887	592554	335872	495347	468782	520876	529508	554185	547351	596746	553355	658612	645102	639822	601714	498594	733199	Tanslation
1265	P0CX54:P0CX53	RPL12B	208652	218079	211244	230999	231483	230797	337550	315156	300522	339837	366451	458588	244333	342510	333115	378470	400059	392274	374079	411800	390963	471457	457903	439935	418450	345901	545868	Tanslation
1266	P11792	SCH9	828.972	896.517	770.367	712.759	809.027		716.992	1089.86	982.687	961.539	1098.16	1245.66	737.714	910.47	958.363	1051.94	977.937	948.218		1030.25	892.476	1029.27	1145.94	940.272	912.708	815.722	1278.61	Stress
1267	P11978	SIR4		52.2263		42.5473			53.0206	57.8923	28.9845	45.0599			29.3135			40.4428						37.9038	51.2799		36.2351			Transcription
1268	P13259	PCT1	1042.46	1275.54	1071.55	1011.02	1452.29	1251.28	1867.1	2173.09	1899.05	2235.74	2244.14	2487.57	1461.17	2374.01	2114.3	2339.38	2357.12	2285.69	2693.24	3084.35	2440.16	3293.26	2909.86	3183.54	2957.24	2428.88	3435.31	lipid metabolism
1269	P14020	DPM1	29798.8	28982.4	27473.5	30363.6	25530	25794	27994.9	28833.2	30207.3	27346.1	35434.2	36726.1	21198.2	27037.8	29062.3	24517.7	28544	28815.1	28264.7	29847.6	26247.7	25689.4	25483.1	22320.5	19605.8	18890.7	22376.4	ER
1270	P14747	CMP2	3543.51	3448.97	3865.79	4298.32	3980.65	4474.9	5501.57	5903.12	5247.36	5358.52	6019.03	6602.7	3435.84	4359.31	5020.84	4478.23	4257.89	4799.51	3902.12	4280.08	3168.95	3915.09	3826.7	3567.95	3514.43	2672.68	3961.33	Other
1271	P17891	CLC1	18905.7	20137.8	19481.3	18562.7	18887.7	18679.5	21199.9	19945.1	20372.5	19975.3	21900.6	22317.1	12866.8	16829.3	17596.9	15964.3	18381.2	18021.2	17262.5	18177.9	17074.5	17831.1	17782.3	16992.8	15478.8	12084.7	16706.5	Other
1272	P18900	COQ1	718.656	756.935		883.473	952.743	840.981	1608.44	1745.2	1355.41	1897.81		2938.7	1293.87	1894.22		1645.85		2201.75	2578.34	2867.13	2501.25	2561.17	2548.87	2887.29	2526.23	1954.67	2988.05	Mitochodria
1273	P18962	DAP2	828.932	960.981	1622.22	807.796	917	1408.47		904.604						778.583				973.251							914.545			Other
1274	P21734	UBC1	25517.5	24811.9	27661.6	24135.8	26308.7	26368.8	30227.4	29275.9	28920	30485	30122.4	39644.6	20669.1	31475.9	31966.6	32971.2	29499.3	32076	29822.6	30912.3	32075.2	30132.3	30181	29757.4	26080.6	20655.9	31965.8	Other
1275	P22082	SNF2								178.726																				Transcription
1276	P23337	GSY1	879.648	1020.56	939.638	691.524		781.205	816.811		914.137	674.311			405.778		370.795			529.788		743.741	502.81		773.653	501.086	577.387			Mitochodria
1277	P23369	MRPL25	4037.95	5583.3	3704.35	4226.11	5112.16	4574.72	7953.01	8788.64	7153.97	9825.83	10789.7	10630.4	5986.51	9831.5	9108.65	10688.9	11465.4	12560.7	10778.3	14301.8	10246.6	11408.1	11521.9	12952	7811.19	11870.2	15057.3	Mitochodria
1278	P23561	STE11													4644.72			6668.08											2535.11	Stress
1279	P23639	PRE8	31362.2	31118	32707.8	31109.2	32252.3	32857.4	36277.4	37671.7	35570	38766.4	39440.4	39331.3	22394.7	32875.2	31558	28829	32201.5	31951.6	29377.7	27807	28743.8	28127.3	26766.5	27356.7	25659.7	18736.1	30374.5	Other
1280	P25335	DAL2			768.652	1530.13				1432.24									2758.13		2302.64	4991.92	2624.32		1802.22					Nucleotides
1281	P25617	YCR016W	1110.24	1097.3	1023.22	1067.26	1158.14	966.07	1541.9	1513.92	1478.96	1670.79	2285.26	2038.5	1095.09	1621.89	1523.76	1601.48	1612.26	1438.63	1427.39	1430.06	1775.74	1486.9	1374.67	1303.11	1370.66	1228.88	1975.53	Other
1282	P25635	PWP2	1200.52	1064.81	1120.67	1274.43	1446.59	1076.95	1719.54	1997.52	1571.02	1805.72			1370.35	1862.78	1443.71	1301.96		1956.31	2196.17	2388.14	2046.44		2442.47	2257.06	2006.98	1667.22		Other
1283	P25719	CPR3	49232.3	48632.7	51123.4	50571.4	53418.4	51722.6	66996.2	74716.3	66348.2	74384	83166	87358.7	49290.2	76009.4	71970.3	77228	86158.3	76713.9	83786.6	96327.2	79883.5	92716.8	87601.5	79217.4	70586.1	57583.4	75898.8	Mitochodria
1284	P27697	COQ8	1893.18	748.009	2404.14	1625.16	2426.73	2661.46	869.033	1817.85	1400.36	1967.05	1825.78		1109.58	1064.75		1511.73	554.74	1798.04	1715.95	546.385	2659.57	1410.75	1291.92		1010.76	1070.93	3371.94	Mitochodria
1285	P27809	KRE2	2842.6	2069.08	2735.74	3245.65	2755.72	2643.42	4066.03	3914.76	3737.03	3701.57	4385.4	4227.59	2342.57	2178.79	3003.56	2579	2336.35	2918.85	2705.63	2547.1	2256.84	2758.7	2500.58	2267.88	2130.46	1869.3	2861.97	Other
1286	P27810	KTR1	2330.66	2214.83	2360.04	3121.3	2690.8	3002.86	5163.88	4882.82	4629.11	4579.98	5816.26	5642.17	2613.51	3678.05	3707.14	3425.45		3384.05	3037.9	3498.96	3443.94	3461.96	3709.68	3380.21	3035.12	3003.75	3813.94	Other
1287	P31334	MRPL9	5363.47	5026.29	4815.9	5532.72	5509.66	5244.14	10301.9	9886	9139.81	11320.6	12562.8	12881.7	8243.66	12149.1	10756.5	12327.4	14721.3	13586.7	14328.2	16934.5	14604.3	16431.3	17461.5	14923.3	13222.7	11536.7	18039.3	Mitochodria
1288	P32178	ARO7	3027.32	3388.14	3785.73	3683.95	4422.15	4309.74	5633.82	5994.56	5588.98	6018.25	6048.69	6605.43	4032.07	5897.6	5545.02	5905.26	6073.9	5667.32	5939.49	6020.99	6306.54	6816.21	6478.86	6622.5	6426.64	5384.55	8133.75	AminoAcid
1289	P32264	PRO1	3715.77	4073.76	4521.19	3985.26	4286.79	3559.34	4543.27	3965.21	4096.36	4644.31	6033.72	6053.53	3303.75	4898.35	4738.96	3904.98	4650.18	4697.16	4801.58	4227.96	4736.86	4953.05	6205.22	4879.03	3188.4	4389.47	6428.71	AminoAcid
1290	P32461	DPH2	1221.64	1195.51	1311.66	1291.73	1380.05	1307.91	1920.88	1947.05	1095.61	1517.96	2154.42	2102.76	1330.98	1999.35	1786.53	2010.86	2300.9	2091.02	2342.67	2150.45	2200.99	2505.21	2395.35	2151.4	2325.21	1619.41	3157.29	Other
1291	P32473	PDB1	138477	141706	138518	142589	141388	136133	167330	164642	164370	174705	187221	191187	111903	166005	153566	174097	167844	168193	159985	155338	160842	148725	150316	138582	124538	97556.9	135653	Mitochodria
1292	P32523	PRP19	1981.35	1872.32	2033.71	1684.53	1944.63	2183.26	2206.06	2000.3	2106.37	1706		2689.07	1388.13	2243.64		2083.4	2248.76	2281.59	1911.08	2177.44	2186.78		2239.57	2209.5	2047.47		2552.96	Mitochodria
1293	P32569	SRB4	1594.01		259.6			271.097				277.275																		Transcription
1294	P32573	SPS19	18592.5	17940.7	15815	17229.7	16702.6	18473.4	14620.7	16393.2	18305.1	14001.8	16405.1	18982.9	10332.7	14747.4	14292.2	13684	13683.2	14582.6	9599.78	4946.82	10006.2	2584.43	2773.39	2376.43	1845.13		1018.14	lipid metabolism
1295	P33309	DOM34	1210.75	1137.09	1066.79		1172.69	1035.78	1454.32	1756.66		1919.22	1576.25		1067.31	1318.57			1907.1	2184.25	1533.76	1469.36	1677.51	1804.09	1542.33	1501.02	1429.99	987.286	1781.97	Other
1296	P33324	YKL091C	2114.32	2129.34	2421.09	2125.86	2323.01	1766.2	1942.14	1997.92	1592.79	1706.86	1763.06		1194.72	1233.53		2250.28		1577.78	1317.46	1656.25	1259.6		1198.37	1299.74			1977.16	lipid metabolism
1297	P34110	VPS35	145.138	148.799	249.597	153.334				184.736			181.016						166.279											Other
1298	P34227	PRX1	73800	77441.1	76288.4	64566.3	61844.8	65442.6	44497.4	44685.4	44876.3	38372.7	38955.8	40599.4	18115	24789.3	23078.2	19125	18130.5	19286.4	18531.6	24124.7	19247.2	26115.5	26463.7	23908.5	22658.4	16807	22051.3	Mitochodria
1299	P35189	TAF14	4749.5	4937.5	4781.24	5022.82	5308.31	5045.12	6586.12	6591.23	6338.17	6681.41	6956.81	7509.55	4156.7	5849.66	5368.08	5216.95	5652.42	5512.49	5572.65	5693.26	5585.37	5405.74	5316.61	5231.71	4824.78	3665.1	5757.28	Transcription
1300	P35691	TMA19	143777	150753	155048	149831	154902	161334	200285	194866	196331	221754	242824	246435	154338	235509	213365	250095	258953	259480	279661	317608	277495	331060	332491	313300	299456	245176	363544	Tanslation
1301	P36000	APL2	915.92	789.264	869.116	897.103	884.8	950.297	1118.05	742.656	1042.92		1062.3	940.378	645.401	885.566			413.724	947.685		944.425			812.822	958.916	647.768		886.71	Other
1302	P36007	SRY1		3162.45	1606.83	1516.09	1177.39	1817.54	1512.43	1272.11	1436.65	2102.11	2068.94	1962.14	763.222	2064.74	1331.8	1373.67	2348.06	944.747	2396.11	4216.9	2536.95	4983.29	4873.5	4644.41	4568.29	3647.55	5813.25	Other
1303	P36080	RRP14	4117.98	4307.5	4468.92	2844.21	2175.07	2289.51	3460.25	2845.36		2830.25	3401.58	3509.95	1963.01	2898.35	2569.7	2355.52	2243.36	2925.3	3038.58	2398.83	2872.71	3298.46	2778.59	2946.39	2934.79	2161.37	3118.41	Translation
1304	P36145	TFA2	820.622	800.541	539.215	790.49	852.933		1182.18	989.016		1048.91	1008.28		821.273	908.482			921.473	981.374	630.797	994.623		1153.84	1152.85	914.995		809.779		Transcription
1305	P36152	DRE2	1437.67	1464.5	1557.4	1644.57	1637.52	1677.02	2312.82	2305.05	2201.13	2705.38	3104.17	4922.67	2031.61	2989.84	2899.67	3410.11	4422.59	3611.89	3636.9	3834.34	3934	4401.67	5009.12	4472.5	4628.37	3813.2	6309.3	Other
1306	P36523	MRPL15	4760.72	4649.54	4791.84	5397.69	5386.17	5442.22	9558.01	10187.4	9166.86	11053.2	12688.8	12600.4	7707.49	11247.6	10672.5	12072	12692.9	13265.4	14171.2	15928.8	13826.2	16826.9	16491.6	16177.2	15389.4	11712.4	17582.6	Mitochodria
1307	P37293	NAT2	847.593	860.039	851.72	1031.75	1192.68		1361.78	1150.9	1014.91	981.949	1621.81	1167.48	834.291	1251.45	1098.05		849.086	1165.17	1087.57	1475.48	1239.86	1163.47	1474.82	1240.84	625.111	865.753		Mitochodria
1308	P38061	RPL32	276372	231127	244517	301073	292429	294543	356362	380464	349747	382374	430237	463018	257507	360728	347874	382539	383403	392092	393275	420438	414035	440666	439173	427950	405055	332608	505117	Tanslation
1309	P38063	PRS4	3518.36	3864.26	3491.35	3811.47	3362.24	3006	4449.2	4124.9	4400.26	4399.31	3623.13	4831.61	3026.77	3283.36	4057.71	4614.75	4495.04	4671.17	3952.86	4322.29	4418.62	4229.38	4115.94	4204.39	3755.74	3324.85	4710.21	AminoAcid
1310	P38113	ADH5	3474.14	3388.61	3866.75	3946.3	3816.67	4190.62	3986.16	4024.47	3961.03	3954.8	4000.91	5299.24	2233.87	3236.23	2449.84	2244.96	4992.68	2540.82	2798.44	1999.2	2420.24	4948.59	1793.3	1636.01	1511.55	3095.17	7325.55	lipid metabolism
1311	P38129	TAF5	888.4	844.647	968.559	894.56	864.061	801.618	1269.97	1089.73	696.915	1074.12	1204.89	1551.95	843.944	1124.53	1024.71	1054.28	1076.5	1469.57	1428.65	1099.59	1205.83	1239.43	1353.85	1273.66	923.586	1316.26	1256.2	Transcription
1312	P38225	FAT1	181.517	213.93	195.99	224.855	208.702	179.31	230.919	313.689	191.821	223.915	319.059		187.142	230.732	237.154	199.054	181.737	215.065		149.465	243.39		223.858				345.648	ER
1313	P38286	IFA38	2461.07	1988.45	2053.56	2614.98	2479.76	2320.86	3320.63	3235.52	2661.32	2522.61	3515.02	3700.75	1942.17	2523.5	2484.93	2067.88	2484.8	2909.33	2328.59	2179.32	2415.77	2378.2	2371.38	2097.77	1991.81	1837.28	2485.09	lipid metabolism
1314	P38620	PRS2	3023.64	3334.87	3278.54	3339.25	3164.76	2910.51	3883.51	3593	3286.67	3665.66	3090.82	3489.85	2907.77	3806.08	3677.19	4855.64	3686.36	4076.09	3808.47	3406.08	3627.73	3931.66	3056.12	3683.58	3467.39	2609.58	4486.36	AminoAcid
1315	P38629	RFC3	2961.57	2632.43	2200.4	2873.75	2333.81	2798.15	3107.45	3067.71	2878.87	3393.25		3962.74	1925.28	2906.67	3451.52	2636.41		4186.01	2899.76	3035.6	3103.79	3308.93	3524.3	3155.3	2955.4	2033.42	3475.34	Stress
1316	P38732	EFM1	1192.57	1066.83	933.685	1382.79	1012.84	969.554	892.285	891.108	785.233	411.337	534.149	1162.88	687.005	767.467	847.695	399.865	452.93	838.456	944.368	1069.86	925.754	1017.79	1178.15	843.311	906.702	876.076	828.016	Other
1317	P38758	TDA3	2183.32	1983.43	1989.07	2110.08	2205.43	2163.97	2558.23	2751.14	2617.15	2620.64	3435.54	3114.44	1873.88	2760.01	2607.53	2724.29	2858.17	2868.51	2894.09	3210.09	2958.06	3475.52	3633.52	3284.43	2979.08	2242.13	3879.02	Other
1318	P38809	YHR097C	4251.04	7217.41	4672.27	6695.25	7312.68	5570.92	8839.1	8678.04	6917.39	6533.41	7644.29	7842.47	3355.05	4530.63	2029.48		3644.76	2987.16		3043.47	3289.43			2189.57	1975.33	2573.01		Other
1319	P38828	LSM12	4708.44	4252.76	4319.2	4612.66	4365.95	4584.9	5994.14	7050.17	6500.8	7315.09	7580.59	8115.35	4242.88	6887.89	8449.23	7162.03	7664.62	7178.98	7898.23	8587.28	7377.9	8291.85	8180.62	7460.2	7556.75	5947.37	7955.97	Other
1320	P38866	FMO1																			537.715	662.244		641.977			559.1		694.987	ER
1321	P38882	UTP9	997.051	981.924	1119.5	1142.04	1149.68	1148.71	1200.49	1410.43	1252.41	1346.58	1757.91	1610.09	907.375	1512.11	1293.55	1588.07	1381.58	1592.88	1299.81	1362.67	1549.62	1559.6	1976.64	1812.59	1956.51	1434.89	2061.76	Transcription
1322	P38883	RIX1	1262.62	1440.52	1186.57	1686.22	1339.24	1456.77		2064.27	2173.69		2847.09	2542.74	1570.74	2234.56	1749.84	1985.52	2084.75	2260.64	2131.43	2018.3	2024.72	2474.9		2245.04		1817.99	2641.99	Other
1323	P38884	AIM18	4365.31	6266.96	5293.52	4537.22	4749.61	4753.27	6009.65	5841.56	5548.85	6046.62	6221.57	7002.11	4221.31	4579.74	5571.65	5820.21	5890.67	5593.6	5912.92	6196.05	5655.02	5804.17	5766.57	5114.63	4930.57	3390.1	4370.62	Mitochodria
1324	P39523	YMR124W	520.923	1067.5	623.013			495.396	629.483	708.026	671.53		907.967	836.021	447.495	640.638	616.544	608.202	853.662	823.276		788.113		728.98	681.005	672.031	630.701	482.129	679.59	ER
1325	P39721	AIM2	13703.5	15322.4	13138.2	13482.6	12760.6	13137.9	11874.7	11028.4	10134	10853.6	11220.7	12004.4	6536.18	9165.05	8541.89	8671.28	8656.31	9188.54	8235.12	9160.52	9247.06	9314.8	9741.67	8961.04	8966.95	6000.64	7956.85	Other
1326	P39929	SNF7	6037.8	5795.72	5753.7	4996.99	5427.1	5179.1	5689.17	5234.73	4967.19	5067.87	5999.43	5900.29	3430.26	5234.45	4596.63	4487.67	4285.75	4043.27	3809.29	4220.17	4491.51	4049.31	4151.5	4216.63	3649.97	2961.26	3986.95	Other
1327	P39965	AIM10	610.117	864.371					654.081		1071.4	813.788	1041.51		778.989	913.058	1065.25	790.577	713.353	979.176	1028.28		796.502	810.104	1044.12	681.886	1059.48		832.433	Translation
1328	P39968	VAC8	9397.32	9082.14	8013.33	8889.65	6551.19	5619.03	8156.69	6124.27	5635.04	7307.46	6358.46	7301.56	4243.35	3499.77	5298.13	3766.33	3545.31	4848.29	4521.96	3813.09	4506.14	4469.46	3393.84	3858.63	3274.73	2648.77	5347.57	Other
1329	P40050	YER077C			68.6052				113.284		137.372	117.915		164.57			118.081		156.902		168.901	196.203			186.594	101.239				Mitochodria
1330	P40094	COG3	185.975	156.048	35.0361			216.848		256.134					172.721	256.028						135.575	202.418		292.642	230.992				Other
1331	P40188	RGI2	14596.2	21528.6	20532.8	12245.9	8003.26	16070.5	5104.27	4087.31	5784.12	3572.41	2558.36																	Energy
1332	P40339	RFC4	3447.1	3576.81	3755.28	3604.29	3470.08	3381.14	4141.63	4377.01	4150.08	4367.88	4466.06	5175.75	3246.56	4337.8	3870.44	3202.02	4431.09	4114.23	3791.06	3749.28	3885.04	3694.85	3632.81	3895.7	3505.45	2484.97	3942.16	Stress
1333	P40348	RFC2	1999.18	1986.51	2023.98	2146.95	2247.26	2224.52	2366.34		3887.24	1952.35	3380.77	2815.99	1519.28			2102.54	2202.11	2619.86	1985.03	1980.69	1897.75	2425.24	1696.4	1886.16	1826.13	1344.46	2530.07	Stress
1334	P40362	UTP18	3026.3	2744.79		2738.69	3175.19	3513.28	3934.19	4164.75	3748.68	4292	4732.09	4974.28	3223.87	4164.54		4689.51	5624.65	5246.56	4773.59	5728.46	5507.66	6707.57	5910.72	5592.99	6387.63	5189.32	7931.73	Other
1335	P40368	NUP82	1020.95	1119.45	1049.3	1003.9	827.477	623.319	1070.21	1024.3	1372.37	1174.39		1336.82	710.626	880.336		1098.35	1171.33	989.137		956.951	1114.02	985.653			984.172	777.46	1161.12	Other
1336	P40483	YIL108W	3015.48	1908.56	2560.8	2083.91	1153.1	1682.1	1296.85	1285.23	1923.44	1178.29	2182.84	2234.1	1078.57	1625.36	1538.81	1623.39	1021.41	1366.96	1247.25	833.71	1668	1003.41	835.021	1699.85	1221.98	750.708		Other
1337	P40506	CAB2	7004.35	6926.25	7521.6	5279.08	5428.27	5379.63	5791.26	6152.96	5561.47	6153.57	6231.06	7006.24	4158.68	6449.95	6037.72	6224.53	6294.8	6614.47	6604.78	6210.39	6716.5	5506.56	5452.31	5048.73	4700.15	3018.41	5051.25	Other
1338	P40509	SEC28	2820.09	2634.08	2721.83	2803.16	2671.62	2301.26	3362.99	2928.72	3102.26	3040.37	4141.34	4126.32	1912.09	2838.91	3196.14	3038.26	3752.2	2967.42	3202.35	3030.72	2852.56	3111.77	2769.7	2820.89	2777.66	2258.4	3999.47	Other
1339	P41818	GLC8	6229.24	7009.7	6514.52	6863.46	6962.41	6952.48	7002.69	7130.56	5943.09	6761.8	6985.14	7164.81	3948.42	5044.37	4996.51	4790.6	4833.55	4875.79	4800.34	5007.52	4765.22	4860.89	4460.79	4502.8	4326.62	3428.58	4252.88	Other
1340	P41819	DIM1	1338.94	1033.41	1264.13	1325.02	1454.41	1415.18	2121.24	2315.93	1935.8	2412.51	2784.88	3682.97	1853.38	2331.74	2391.8	2753.72	2698.46	2763.25	2762.27	2673.03	2498.29	3078.06	2759.37	2601.25	2627.82	1913.7	2985.27	Other
1341	P41920	YRB1	30866	34813.6	28768.5	29056.9	31078.9	27123.9	31398.6	33354.4	30798.7	33851.2	35502.2	37186.2	22218.8	33477.2	32421.1	33841.7	35140	34642.9	33285.9	34643.5	33885.9	36607.9	35691	34209.2	32296.3	26859.5	40520.4	Other
1342	P42900	SLS1			156.507	106.54													381.368	310.522		471.196	549.917		478.926	445.016	440.232			Mitochodria
1343	P42941	SER2	3503.23	3134.66	3921.99	3315.5	3731.29	3535.76	4626.7	5067.85	4890.39	5077.09	5509.7	5784.34	3411.59	4910.54	4858.45	4499.1	5088.34	4817.05	5032.89	5268.85	4973.68	4816.89	5285.52	4678.22	4822.28	3931.08	6628.72	AminoAcid
1344	P42949	PAM16	4338.39	3906.21	4890.5	4723.74	5554.83	5953.4	10314.9	9657.2	10124.2	11147.9	13292.1	13147.6	8408.55	13542.5	12240.7	13821.9	12471.2	15389.9	15883.1	17100	17490.7	17476.5	18918.6	16637.8	16080.1	13579	19134.7	Mitochodria
1345	P43603	LSB3	13873.8	12754.7	13822.1	12215.7	13048	11925.4	12314.3	13899.1	12605.4	13237.2	13848.4	14594.5	7650.15	11223.6	11210	10063.7	11509.9	10572.4	10449.8	10780.9	10699.5	11754	11205.9	11362.7	10489.9	8387.95	11595	Other
1346	P45978	SCD6	4447.05	4570.91	4421.68	4306.99	4782.07	4254.2	5818.59	6869.16	5974.41	6357.44	7122.83	7263.98	4407.17	6170.95	5786.75	6386.67	6311.22	6418.86	6312.51	6425.91	6590.99	6561.76	5928.25	5925.3	5702.63	4449.31	5974.82	Other
1347	P46971	PMT4	779.776	1172.6	928.083	657.02	614.952		1413.67	1207.44		660.84	1034	1365.34	810.102	999.323	1564.95	972.731	1037.95	991.311		1239.59		1747.59	1370.41	2649.63	1115.62	1133.13		ER
1348	P47096	BNA1	11563.2	12249.1	12139.5	12629.3	12556.8	13209.4	19220.5	18998.3	16471.4	16806.9	18212.7	21793.5	10596.6	12848.3	13148.8	11991.9	11452.7	11335	10740.2	9791.44	9770.33	10010	10574.5	9035.2	8478.62	6803.16	8788.95	Other
1349	P47108	URB2	983.914										49.3345					787.814							235.288					Other
1350	P47165	XPT1	11031.2	11691.5	11408.1	11294.7	12011.1	11896.1	15884.8	16218	15776	16292.4	18541.6	19603.7	13283.7	20357.8	18180.8	22721.2	23845.7	21094.9	23462.9	24835.8	24187.1	24103.1	23428.4	21691.1	19316.9	15529.8	21312.5	Other
1351	P48237	CCM1			545.005									385.409				366.652		450.54			497.449			300.32			454.585	Mitochodria
1352	P48524	BUL1		708.956					742.32	384.992		381.278						544.614	322.621	776.021	325.566		241.674	1006.68			503.408	625.337		Other
1353	P49166	RPL37A	64633.6	66826.2	75435.7	69430.9	73569.6	71927.3	99869.4	106620	95982.6	112359	121684	126158	73914.8	111101	102889	118451	125292	121772	124689	138084	121170	149598	147706	138096	136641	114431	167814	Tanslation
1354	P50623	UBC9	9658.91	8632.15	9340.28	8695.89	9375.21	9386.84	9407.64	11019.3	8941.67	9871.55	9998.47	11102.2	6463.92	9653.66		9553.49	9782.27	8836.61	9146.2	9178.49	8977.3	9037.52	8470.44	8237.59	8429.08	6580.89	9435.66	Other
1355	P51402	RPL37B	37857.9	37869.8	38288.4	40015.2	40299	46266.1	55743.1	52848.2	53608.7	63233.9	66048.8	69283.8	41976.4	59342.1	61946.2	67888	70166.9	70322.2	75989.2	79680.9	72766.9	89199.8	83113.5	86347.7	76169	66281.9	102172	Tanslation
1356	P51601	FOL2	7938.46	7784.52	7129.34	9222.41	8914.72	9680.72	14124.5	13717.6	13492.9	13481.4	14537.7	16543.3	9022.6	10887.2	10488.2	11365	10549	10444.9	11122.1	11160.9	12338	12540.9	12067.8	10943.1	11366.7	9129.67	13821.5	Other
1357	P52489	PYK2	3219.36	3954.57	3480.7	3233.31	2957.74	3627.49	3546.39	3412.18	3021.89	3451.64	3619.19	3687.6	2612.36	2371.09		2814.79		3887.26	2670.9	3071.55	2947.89	3189.68	2770.16	2883.68	2377.78	1849.52		Glycolysis
1358	P52891	NUP84	1004.92	667.609	1294.45	1110.1		978.866	826.092		959.485				613.919	734.246							764.904							Other
1359	P53072	TAN1	3305.13	3896.66	3404.69	3964.2	3137	4446.86	3747.02	4002.83	3558.59	3856.88	4644.93		2477.09	3773.6	3403.11	3423.91	4083.51	2761.94	4177.86	3757.28	4153.72	3455.67			3178.69	2628.86	3746.94	Other
1360	P53111	ARI1														1435.77														Other
1361	P53258	MDR1	125.139	94.299	198.769	104.549	92.4623	72.8907	135.275	90.1663	105.337	100.013	110.439	140.192	50.7055	73.7526			86.1247	93.3004		89.945				79.169			92.0804	Other
1362	P53275	YGR127W	1564.49	1538.44	2326.09	2363.54	1350.83	980.574		944.865	1552.24	1330.37				724.32					421.818									Stress
1363	P53890	BNI5	583.808				596.423		950.574	1046.59	993.674	964.662	1404.79	1423.18	931.738	1309.95		1407.07	1433.15		1313.9	1370.78		1493.01	1286.7	1310.81	1256.32	1050.32	1754.04	Other
1364	P80428	ARP4	2262.81	2170.43	2422.76	2078.45	1770.08	1894.71	2284.34	2302.73	2086.93	2406.68	2147.9		1521.7	1941.13	1554.33	1897.5	1785.04	1714.53	931.118	1780.99	1701.8	1672.07	1590	1340.42	1400.06	1022.91	1552.67	Transcription
1365	Q00764	TPS1	56176.3	55564.3	54200	60669.4	60986.7	60396.1	71559.6	69964.9	67828.6	63197.1	61775	65852.8	31739.3	39478.5	36479.4	30364.8	28661.2	28751.4	24422.9	30345.6	24868.8	28976.9	29094.2	25824.1	22974.8	16854.5	23962.4	Stress
1366	Q01159	CEG1	1236.17	1059.71	1175.66	1269.67	1427.17	1249.08	1327.87	1503.83	1417.31	1443.29	1508.62	1335.57	840.048	820.232		1380.87	1524.38	1353.83	989.672	1219.24	1271.69	1159.55	1272.3	1623.27	1209.64	674.398	1570.67	Other
1367	Q01590	SED5	2189.82	1642.05	2155.35	2001.76	1942.67	1655.17	2367.61	1845.87	2046.97	1493.51	1541.43	2679.85	994.13	1871.4			1510.28	2817.82	2347.17		1829.64			1743.71	1469.84		1788.57	Other
1368	Q02724	ULP1	197.826	219.83	251.057	346.664	238.693	232.452	348.989	354.025	319.707	321.136	256.817		229.192	372.814		354.05	253.626			272.35	328.527		281.144	295.061	279.271	224.783		Stress
1369	Q02932	KAP120	185.421		172.469	155.715	208.023	218.356	206.123		178.806	160.979			94.6849	162.308				184.661	123.489						135.077			Other
1370	Q03254	FCP1	1477.18	1552.48		1412.61	1719.55		1546.56	1966.81	1665.95	1568.71	2169.63	1620.55	1007.91	1398.53		1530.81	1550.78		1670.1	1655.7	1685.13	1750.93	1684.25		1728.89	1101.14	1359.68	Transcription
1371	Q03262	PGM3	4762.65	3924.65	4405.13	4075.2	4013.93	4542.74	3136.6	3138.68			1942.56	3617.74	1945.71			2115.41	1921.54		2730.46	1592.05	1316.24			1656.84				Energy
1372	Q03407	PKH1	320.303		176.384	235.57	266.248			567.402	403.241										337.074	348.536			385.06	176.381				Other
1373	Q03661	ESC1	174.639	207.759		198.949	181.763		210.881	180.861		188.787	249.978	140.503		187.839		143.645	178.342		138.87	166.719		98.6861	25.5762			97.7507		Transcription
1374	Q04182	PDR15								277.504					216.246			179.22			222.741					295.929	310.586	177.59		Stress
1375	Q04491	SEC13	57375.9	57832.4	59078.5	49518.2	46082.6	49914	52664.4	55706	54312.2	54043.8	58185.8	61572.7	35719.8	50625.7	49690.8	50220.8	51673.4	51451.1	44012	48461.2	50532.5	50139.4	51917.7	51912.9	45811.2	36158.7	57928	Other
1376	Q04600	TMA64	973.703	980.252		769.823	869.964	898.922		425.551	718.501				861.9	686.328			555.186		967.363	609.572	1091.45		713.231		833.172			Other
1377	Q05881	YLR287C	1901.29	1629.54	1522.89	1619.33	1585.54	1143.68	1837.51	1866.32	1536.21	1902.82	1702.88	1849.38	1164.18	1402.05	1366.04	1500.43	1422.02	1469.49	1362.48	1602.07	1415.35	1469.87	1624.28	1156.84	1330.86	1288.09	1383.45	Other
1378	Q05902	ECM38	424.768	718.599	608.375	614.163		399.075	704.42	687.288		736.953			401.288	63.6455		517.742			459.273							251.268		lipid metabolism
1379	Q06137	YLR345W	5324.25	3132.07	6009.75	5406.17	4311.55	4168.43	2934.97	4040.15	3905.35	3767.27	3069.4		1919.16	1613.89				1904.9	3019.38	1645.18	2077.6		1433.82	1542				Other
1380	Q06146	YLR257W	5589.67	5257.78	5956.25	6286.81	6782.99	6826.17	9975.81	9884.78	10104.9	9490.04	9306.66	9851.86	4368.39	5685.24	5148.59	4486.49	4457.35	4202.84	4207.72	4969.44	4565.74	5227.22	5156.32	5166.05	4730.36	3524.84	4828.52	Other
1381	Q06338	BCP1	3179.57	3635.64	3279.15	2930.17	3162.32	2994.21	3337.57	3227.55	3204.32	3860.55	3610.89	4264.82	2708.09	3913.18	3506.2	3949.44	3850.05	4140.37	3945.54	3959.2	4307.18	4386.27	4120.65	4018.34	3690.76	2895.23	4510.06	Other
1382	Q06708	VAC14	439.595	403.478	317.073	398.14	371.044	335.817	345.641	344.782	423.573	354.514	311.058		214.437	319.844			283.86	383.051	291.436	373.81	244.329	338.65	321.662	246.899	270.104		303.686	Other
1383	Q07362	PBP4	3955.14	4252.02	4712.85	4549.08	4740.68	4352.75	6865.73	7408.13	6669.35	8357.06	8938.19	8724.46	5769.38	8515.25	7809.62	8913.04	9701.88	9325.89	9472.52	9411.9	9082.23	10724.4	10260.2	8929.97	8772.86	7332.55	10379.9	Other
1384	Q07657	SHS1	3793.03	3584.84	3690.38	3953.09	3398.1	3760.9	4389.98	4592.86	4266.61	4754.74	5411.76	5922.85	2995.91	4747.26	3889.72	4069.24	4540.13	4309.7	3737.25	3799.18	4209.88	3778.79	4064.4	3818.2	3035.23	2662.89	3496.89	Other
1385	Q07979	RSC58	1519.28		1301.96	1009.82	1706.72	1517.38	1708.53	1565.96	1619.69	1688.3	1662.2	1926.88	1170.5	1698.8	1591.6	1486.61	1998.34	1762.95	1913.15	1450.34	1853.43	1817.73		1400.83	1774.11	1198.29	1845.44	Transcription
1386	Q08096	RCL1	1399.81	1456.2	1504.07	2016.58	1651.49	1583.18	2554.84	3138.77	2367.58	2925.1	3734.55	3917.89	2141.67	3636.34	3565.42	3349.55	3780.74	3732.39	3397.99	3415.32	3421.49	3591.97	3600.94	3293.34	3339.27	2698.87	4019.77	Other
1387	Q08235	BRX1	9242.96	9119.68	8992.47	10110.5	10089.9	9983.94	13332.2	14292.9	13171.9	15153	16257.5	16374.6	10272.2	14947.7	13568.5	14780.6	15114.9	16202.3	15791.2	15679.2	15141.7	16203.2	16148.7	15853.2	15582.8	13309.2	18853.9	Other
1388	Q08581	SLK19											125.808								350.582									Transcription
1389	Q08954	YPL199C		2412.27	1959.68	2706.1	3281.6	2332.9	5121.95	5304.25	4042.95	5557.02	6747.59	6009.95	3855.43	5385.32	4972.94	5260.62	5603.61	5434.13	6274.34	6162.43	6863.42	6541.58	6529.19	5931.92	5687.29	4987.01	8052.5	Other
1390	Q08960	TYW1	609.593		540.737	947.756	916.429		1786.21	1239.22	1089.62	2038.58	1730.97	1698.36	1210.88	1467.75	1611.86	2035.03	1977	1930.27	1762.71	2065.49	1758.81	2108.2	1945.19	2060.76	2001.32	1430.57	2160.13	ER
1391	Q12125	GET4	2528.16	2597.53	2573.11	2564.93	2439.41	2301.12	2628.28	3194.9	2080.61	2214.08	2500.29	2996.53	1419.78	2133.51	2042.45	1651.73	1650.83	1545.2	2303.63	1777.42	1776.31	1966.63	1062.67	1810.65	1863.63	1617.69	2301.78	Other
1392	Q12329	HSP42	140279	145684	157346	151023	134302	146133	100679	102055	103388	75705.8	72357.9	75700.2	23844.1	23299.4	23856.5	12085.6	11220.2	10715.1	9105.32	9523.54	9275.28	8229.92	8145.65	7934.57	6506.07	4837.44	7362.92	Chaperon
1393	Q12341	HAT1	1780.09	2055.58				1460.22	2074.2	2358.34				2244.09		1748.45			1549.47	1826.67		1358.51	1463.38			825.401				Other
1394	Q12400	TRM10	2132.79	2523.77	2484.74	1946.35	2059.01	1901.25	2543.85	2710.51	2180.21	2704.11	3393.55	3426.3	1813.28	3305.28	2548.21	3476.78	3350.35	3579.87	2938.42	3151.39	3201.72	3170.29	2942.8	2819.79	2851.42	2127.71	3658.76	Stress
1395	Q12452	ERG27	2841.4	2486.89	3051.89	3066.44	3094.34	3131.25	5243.08	4009.44	5038.53	4562.37	5861.7	7082.33	2875.91	4076.35	4878.24	3522.47	3544.15	3800.57	3240.34	3596.89	4054.77	3948.08	3291.63	3483.59	2418.33		3097.66	lipid metabolism
1396	Q12514	NOT5	1374.51	1336.13	1596.5	1115.04	1404.39	1457.36	1784.29	1950.51	1573.52	1303.3	2232.52	2181.54	1089.28	1487.56		1301.13	1714.76	1699.66	2115.41	1109.52	1982.59	1461.15	1498.79	1791.07	926.021	1168.13	1831.08	Transcription
1397	Q12672	RPL21B	270312	271612	235307	309899	295015	293529	370312	344616	342738	409792	436001	412628	247186	394362	330924	439360	417410	452016	420932	435404	437418	473480	453139	451319	411789	346201	550718	Tanslation
1398	Q99312	ISN1	5267.77	5541.31	5916.08	5168.9	5830.75	5085.15	5943.28	7690.81	6754.86	7161.07	6290.63	7273.51	4056.04	4587.62		4568.56	4600.82	5081.22	4556.08	4948.2	5626.1	4670.9	4771.9	4207.6	4196.21	3256.61	4638.73	Other
1399	Q99316	MPD2	3243.48	3093.73	3642.32	3483.87	3754.37	3716.09	5172.35	5642.95	4891.44	5753.91	5170.61	4957.71	2848.34	4525.82	3431.96	3578.42	3671.66	3512.64	2911.23	2338.89	2927.53	2231.29	2073.32	3244.52	1543	1486.47	3608.76	ER
1400	O14467	MBF1	147505	156967	151045	136384	133086	133567	118990	119022	120626	115379	119807	121961	64290.5	90805.3	87780.2	82648.8	86340.1	88145.8	85516.7	93203.8	85970.3	106616	104007	101705	99670.4	80272	126460	Transcription
1401	P00447	SOD2	144753	142994	153620	129812	134644	133073	110031	115495	108586	105241	105893	113840	54924.7	78540.7	72414.8	71593.3	77195.8	75895.1	81809.5	103989	82136.9	98167.5	102121	92469.6	81808.5	61287.3	80778.6	Mitochodria
1402	P03872	REP2	3590.29	3498.36	4157.74	4000.68	3734.29	4279.45	6666.9	4998.28	4760.68	6137.6	6172.21	6755.41	5054.08	6753.12	6751.63	6931.17	7275.69	7014.74	7689.39	8843.69	8099.14	4618	5049.05	5245.21	6203.67	5771.07	8583.83	Transcription
1403	P04037	COX4	26983	27473.2	28494	29800.4	30263.1	30937	31886.6	32979	32470	33463.8	33853.5	35477.7	20964.7	31921.3	30901.1	31584	34795.9	32142	33327.8	40095.9	32565.3	34241	36056.6	31995	27642.3	20581	29455.8	Mitochodria
1404	P04456	RPL25	235178	241654	248152	266188	267865	264952	337307	364310	340582	387766	427374	446233	266955	409750	362859	432574	440143	450124	444545	473349	452492	544434	513961	508982	483424	390627	590517	Tanslation
1405	P05317	RPP0	316789	280773	274147	327466	305463	277173	431427	374030	365593	444541	506850	545771	324723	421689	420440	446184	420863	455601	503544	464997	452908	512693	491969	490493	462471	366123	615202	Tanslation
1406	P06367	RPS14A		194766	248668	250137	222330	255705	319087	323066	348414	413054			267720	435304				456706	458680	479957	476203		532298	535970	499932			Tanslation
1407	P07260	CDC33	33819	29566.2	33322.8	31569.2	31709.5	32013.9	41261.7	41222.2	40340.4	44815.9	50226.8	53463.3	31665.1	47952.5	45612.5	48799	51312.8	51175.3	50768.6	56970.9	52858.1	56606.7	56498.2	54856.2	50876	40584.3	60321.6	Tanslation
1408	P07277	ERG12	4705.42	4614.16	4609.31	5200.33	5478.26	4523.8	6330.84	5972.7	6058.44	5799.2	6680.12	7269.09	4042.38	4777.51	5147.9	4415.3	4858.64	4406.59	4256.56	5054.4	4607.16	3958.41	4412.9	3795.56	3435.91	3309.84	4130	lipid metabolism
1409	P07281	RPS19B	45577.1	48790.9	43600.5	57753.9	54748.7	56361.8	68505.1	67181.5	65838.3	80065.1			51910.7	75474				76247.8	81384.2	85424.9	81061.7		99242.8	97983.1	90091.5			Tanslation
1410	P07347	ARD1	8733.2	7631.03	9092.07	8549.26	8232.29	8042.54	10589.1	12646.8	9362.12	11453.3		12213.2	7648.36	11287.5	12517.7	9814.5	11982.8	10903.6	10853.6	11843.1	11473.4	13045.5	11385.7	12267	11836.5	7935.31	13176	Other
1411	P07884-2:P07884	MOD5			263.759				711.876	612.473	455.534			614.541	360.781			533.097		574.636	620.709	576.064	632.783	626.808		693.468	558.606	476.325	732.212	Mitochodria
1412	P08425	MSF1		1460.48	1136.06	1365.92	1613.04	1378.96	1940.16	2172.66	1516.76	2343.96	1807.92	2292.78	1540.98	2082.58		1991.51	1947.5	2718.89	2277	2146.51	2290.03	2392.41	2228.85	1780.39	1956.83	1338.83		Mitochodria
1413	P08678	CYR1	338.82	398.991			331.106				188.151																			Nucleotides
1414	P0CX42:P0CX41	RPL23B	138024	138043	136585	159574	153394	141655	200713	208740	194931	227520	250606	270990	152424	236611	217217	244716	253617	258558	245335	268925	260596	292474	286464	277569	261291	214295	328954	Tanslation
1415	P12904	SNF4	2142.7	1823.67	1731.41	2369.11	1947.25	1530.27	2901.7	2365.76	1862.14	2959.41	2093.01	3172.75	1928.95	1740.72	2417.36	2342.18	1984.04	2790.83	3064	2147.34	2569.8	2688.44	2448.49	2240.11	1718.76	1281.71	3012.67	Transcription
1416	P14681	KSS1	1595.87	1397.21	1263.28		1245.09	2328.46	1759.54	1854.83		1283.46	1258.68	1627.52		1668.99		1238.29	1008.03	1768.43	1596.99	1308.9	931.865	1838.69	1056.46		1348.13			Other
1417	P15703	BGL2	85364.6	88397.8	77407	85673.1	74399	77691.5	79478.3	81317.7	81829.6	77722.4	80164.2	87338.9	40066	60642.8	54858.8	57732.5	57002	56066.9	45772.8	48454.3	50014.8	46472.2	46439.5	44915.5	42320.1	33403.7	50058.8	Other
1418	P17121	SAC7						36.2907			57.5297																			Other
1419	P19812	UBR1				93.059	188.32		146.871	262.53		167.428	235.264	304.229	144.016	182.084		139.967	211.94	153.622		139.305	203.581	178.852			183.209	143.149		Other
1420	P21825	SEC62	6150.35	6904.03	9045.32	7264.85	6969.67	6421.17	10764.2	9793.59	8439.06	7974.19	11693.5	11109.5	8531.71	8778.66	9219.5	8798.99	9597.88	7847.1	8088.55	8104.09	8550.76	6736.16	7377.03	5612.39	5791.98	5573.18	8023.58	ER
1421	P22803	TRX2	83428.9	80188.4	79659	81290.2	90035.5	84163.3	75511.1	78665.9	74451.2	69544.6	70542.4	72731.7	35035.5	48281.1	44405.9	38811.7	40339.2	39263	36476.7	34664.9	36762.8	32858.5	33075.4	31781.6	28775.9	22190.7	33190.1	Other
1422	P23724	PRE7	38079.1	41764	38412.3	39511.4	39309.4	40765.7	42838.6	41922.6	39075.8	41329.4	46395.6	46158.8	24413.8	36036.8	32083.8	31930.7	32569.1	32864.2	30283.2	30604.4	31109	29846.7	28921.2	27295.8	25693.2	19909.8	29353.3	Other
1423	P25040	TSR4				906.683										1197.88		914.683		855.218							892.474			Other
1424	P25342	CDC10	13017.2	12694.8	13927.7	12101.6	12966.1	12795.1	17943.3	19317.2	15557.4	17513.2	17196.1	19822.6	12135.9	14997.2	14613.9	16693.8	15228.9	14823.8	15535.1	14224.3	15308.9	14911.8	13847.2	13146.5	13257.9	10196.7	13995	Other
1425	P25368	RRP7	1951.28	2496.54	2765.39	1874.57	2506.86	2839.49	3756.88	3799.17	3492.87	3192.6	4351.54	4480.32	2528.7	4004.06	4314.06	4345.08	4337.26	3862.98	3685.75	4707.53	4186.64	4150.95	4732.16	4572.11	4093.94	3525.64	5028.19	Other
1426	P27351	APL1	617.698	490.205	541.105	428.564	357.178	416.809	427.288	450.133	491.987	530.062		434.787	350.409	583.889				481.374	516.132		434.75		525.505		424.022			Other
1427	P29055	SUA7	1769.48	1490.55		1684.97	1798.11		1962.07	1848.43	1950.28	1592.8	1638.53	2512.16	1437.44	1995.81		1920.16		2009.36	1718.26	1882.19	2224.49	2165.66	2196.62	2555.38	2228.06	1545.8	2896.9	Transcription
1428	P31382	PMT2	4954.33	4486.63	4707.89	5717.45	4803.27	4933.34	7192.67	7541.18	6930.55	7008.73	10355.7	9709.34	5114.63	6834.02	7395.9	7074.14	7212.68	7717.24	6915.9	7892.47	6901.92	7648.54	7959.34	7269.91	6076.27	6063.06	7444.72	ER
1429	P32048	MSK1										541.735				532.578				584.766		980.108	778.125	845.666	697.743	1245.66			904.596	Mitochodria
1430	P32332	OAC1	4220.65	4074.22	4577.75	5303.93	5259.57	5174.01	7090.68	7451.67	5555.4	6821.8	7994.26	8595.86	4491.44	6516.94	7015.01	5989.52	6648.27	7037.05	7155.6	6782.33	7381.63	8556.03	6729.32	6597.86	6747.36	5820.08	9534.6	Mitochodria
1431	P32364	SMY1	443.245	432.234	392.291	431.562	406.172	445.217	465.665	411.504	414.346		494.613		337.887	466.693		428.385	412.801	582.912	505.79	348.222	355.056			229.114			370.496	Other
1432	P32379	PUP2	26332.7	25476	27209.4	24110.5	26690	25198.7	28083.4	28739.5	28933.3	30564.8	32035	32853.1	18004.6	26755.5	23169.4	24464.7	24303.8	24176	23237.8	23152.2	22794.7	22062.1	22530.4	20466.6	19574.5	15557.8	24210.1	Other
1433	P32388	MRP49	4540.73	4856.82	4991.97	4553.9	4870.62	5023.82	7293.92	8803.01	6687.49	9673.34	12085.1	11494.7	6352.88	10927.7	10565.3	11353.8	13088.4	10208.7	13210.2	15859.1	7800.41	14532.1	15266.9	12744.9	13372.1	10368	15610.6	Mitochodria
1434	P32621	GDA1	779.05	830.772	736.82	1123.31	1160.69	1207.87	1651.09	2125	2061.38	2048.13	2278.78	2148.66	2573.37	1724.79	1932.3	2062.79		1782.2	1710.15	2041.94	5417.32	1984.29	4227.12	1718.84	1671.01	1741.76	2432.97	Other
1435	P32639	BRR2		32.2161						21.9626	20.7952	85.241							26.2507		25.4684	35.4997	38.2775	36.0739			36.0557	34.6424	50.4376	Transcription
1436	P32799	COX13	40067.8	39937.9	38550.8	45070.6	44746.4	46421.9	45140.9	46961.1	43918.9	49685.6	53906.5	53951.8	31496.3	45516.5	43564	45919.6	46006.5	46350.8	43805.4	56530.8	45593	51407.9	51333.1	47314.1	41767	31235.7	48059.3	Mitochodria
1437	P32899	IMP3	1268.37	1203.24	1350.84	1296.06		1354.24	1783.17	2166.6	1915.34	1967.56		2493.97	1500.65	1973.7	2121.14	2161.5		2221.69	2105.55		2455.54	2793.8	2490.3	2743.34		2196.31	3108.68	Other
1438	P33311	MDL2	409.166	373.311	529.172	530.349	483.015	465.131	252.747	603.699		243.63	232.266	455.416		544.165					246.27				272.192					Mitochodria
1439	P33891	TIP20	77.0455								317.282	53.5877							394.153				265.384						183.341	ER
1440	P34111	TFC3		62.1482			82.6455								86.907					83.5373		79.3891	70.7206							Transcription
1441	P36018	YPT52	4385.87	4443.64	4166.68	4832.82	4757.42	4593.6	5488.46	6515.55	5944.11	5717	6979.69	7196.55	2425.95	4632.69	4206.69	3301.39	4272.53	4229.53	3784.06	4215.46	3916.98	3637.56	3579.64	3090.79	2824.89	2669.06	3758.13	Other
1442	P36024	SIS2		2336.52			1856.07											1972.03			2071.89							2736.23	2686.31	Stress
1443	P36035	JEN1	8351.5	6197.74	6331.38	4134.79	7110.68	6721.85	6103.65	6459.66	4716.98	5004.22	7593.45	7594.87	4119.74	6819.31	7629.03	7901.73	7767.83	6210.92	4281.04	2421.34	4092.2	1091.2	1163.68	870.71	518.889	366.667		Mitochodria
1444	P37267	CBP4	12426	11530.6	12687.4	12501.9	10909.4	12603	15921.9	12533.5	12479.8	15294.5	14727.4	16742	10459.5	13602.3	14556.1	15693.4	14754.3	16124.8	17494.9	15513.2	16757.7	16111.7	15548.5	16311.2	13498.9	9963.27	12473.6	Mitochodria
1445	P37370	VRP1							1582.34	1415.36						927.915		866.552			1249.7		1156.5		985.86		825.328			Stress
1446	P38075	PDX3	21438.4	20397	20705	23848.8	27376.6	25938.6	41179.3	43325.3	40918.1	46563.5	47167.2	51326.5	28377.6	39241.2	36419.3	34417.2	37142.2	33750.7	33808	33131.6	33789.4	33582.2	32240.5	30281.8	29342	23274.1	34719	Other
1447	P38080	AKL1	159.655			235.617	184.442		180.33			169.557	270.025	279.791	111.573	213.869	238.929	169.491	133.04	145.514	108.791	157.9	120.932	177.786	142.598	128.015	157.779	107.126	173.946	Other
1448	P38132	MCM7	15505.4	17628.1	17361.8	17678.6		18629.9	24263.4	33666.2		32261.4			26807.1	32115.9				39774.4	32892.9	50431.1	37931.1		36265	35262.7	33918.6			Transcription
1449	P38234	RFS1	8446.95	9220.88	9037.06	8813.09	8446.24	8331.79	9943.96	10113.1	10237.7	10032.8	10391.3	10971.5	7085.89	9749.78			9851.88	10267.7	9862.46	9992.58	10292.4		11192.2	11048.1	9645.5	7181.55	11420.5	Other
1450	P38272	SHE3	842.95	948.381	671.556	1251.89	904.854	678.404	1048.98	1166.19	783.905	1038.48	1343.2	1242.23	761.082	1156.16		1294.71	1366.93	924.269	893.883	1244.3	1217.18	1267.23	1547.29	1296.91	1243.15	949.655	1776.46	ER
1451	P38281	APD1	3913.85	3760.69	4579	3936.49	4154.98	4604.98	4353.57	4821.74	4575.97	4421.18	5048.59	5423	3206.34	4371.08	4498.47	4471.71	4565.27	4914.51	4627.21	4868.29	4888.51	4405.58	4443.18	4135.8	3689.77	2668.95	3647.9	Other
1452	P38349	UBX7	3312.72	2228.34	3422.61	2784.03	2749.29	2546.22	3049.38	2860.97	2434.13	2998.04	2709.7	3897.8	1595.07	2082.23		2136.35	2236.76		1980.79	1744.71	2046.41	1632.47	1547.03			1163.21		ER
1453	P38439	LEO1	2577.61	2587.5	2711.3	2559.43	3021.47	2732.76	3919.8	3632.22	3653.5	3522.17	3945.13	4107.77	2357.58	3037.82	3337.84	3598.24	3250.18	3265.87	3084.31	3626.95	3157.78	2928.75	3180.17	2886.62	2892.03	2326.03	3156.98	Transcription
1454	P38523	MGE1	25809.1	26945.6	25690.8	26967.9	28818.4	28694.6	37927.7	37888	34966.4	42771.6	48772.3	44618.9	27795.8	44475.9	42030.7	45704.4	50189.8	49128.7	50518.4	56985.8	51921.1	55371.6	54387	52539.8	47126.2	37531.8	52793.9	Mitochodria
1455	P38705	DIA4	442.526	480.804	466.465	520.86	470.529	504.161		659.279	546.832	498.417		822.576	417.664		470.218	668.446	656.704	769.716		632.69					455.484	231.925	599.138	Mitochodria
1456	P38719	DBP8	1023.97	1208	1000.74	1101.89		1287.59	1516.36	1488.17	1354.76	1603	2020.03	2176.76	1261.15	1833.66	2163.46	2029.52	1884.7	1789.44	1810.09	1935.9	1826.54	2314.89	2173.74	2037.07	2265.93	1874.2	2939.23	Translation
1457	P38781	RSC30	534.158	730.495	727.599	894.086	670.576	605.909	1037.29	986.636	857.805	920.562	1285.23	1250.74	617.887	408.264	836.261	691.846	819.03	868.164	1067.35	764.545	844.024	1132.88	989.291	749.361	750.861	671.398	924.062	Transcription
1458	P38862	ATG7	376.742	475.163	451.557	683.942	591.33	613.923	492.999	403.414	506.649	429.837	406.663	400.956	271.512	387.393				275.969	304.361									Mitochodria
1459	P38903	RTS1	482.101	491.112	430.799	524.148	517.71	448.197	649.031	679.668	468.758	587.38	810.73	690.347	336.136	459.415		450.116	479.586	447.73	404.3	464.865	437.385	457.697	419.626	428.497	357.792	342.504	429.617	Other
1460	P38932	VPS45	1209.99	992.839	1044.5	1094.54	1152.18		1220.71	1360.75	1090.6	1244.74	1270.26	1363.95	740.198	1033.78	1061.87	988.548	965.033	848.291	941.497	906.509	1058.05	822.067	831.598		815.828	597.696	1022.73	Other
1461	P38970	HAL5					378.789	654.441	596.306	496.542	431.533									580.27	486.05				487.984					Other
1462	P38986	ASP1	4832.54	4386.59	4565.59	4743.19	4319.35	4726.16	6344.08	5913.21	6238.37	5903.14	8050.82	8245.86	4268.96	6665.17	6644.72	6651.16	8050.11	7682.33	7191.89	8294.05	7792.58	9452.58	9571.25	9654.9	10006.5	7902.69	12242.4	Other
1463	P39006	PSD1			1561.45				1959.78		2273		3657.59	2328.23		2155.18						2819.98	3049.03	4361.67	3435.59	3502.03		3311.78	3026.42	lipid metabolism
1464	P39107	MNN9	12019.1	13027.9	11953.8	14438.4	12956.1	12323.1	15514.6	15937	12229.4	15102.7	16973.7	18270.9	10262.2	13060.2	13327.4	11800.4	13689.1	13362.2	14099.9	12736.8	13477	12753.4	12911.1	11631.9	11730.8	10164.1	13936	ER
1465	P39516	RPS14B	4175.05	3484.54	3449.76	4338.96	4652.55	4182.94	5440.15	5641.15	4954.61	5342.83	6123.39	6441.91	3508.01	5316.11	4503.45	5240.27	5425.22	5408.83	5496.13	5992.25	5418.92	6499.93	6478.01	6133.95	5976.57	4828.13	7431.86	Tanslation
1466	P39945	AST2	535.088	512.1	532.81	641.192	484.927	537.822	677.63	489.054	555.841	519.489	572.594	612.23	384.487	479.24		589.13	477.54		440.827	472.192	431.158	467.03			421.879			lipid metabolism
1467	P40036	GIP2	581.738	578.595		511.663	537.035																							Other
1468	P40037	HMF1	35107.8	40392.4	42738	40977.1	40091.5	40335.5	44442.3	44975.8	43270.8	44264.8	44933.3	49976	27972.2	41409.6	34937.9	41381.5	45000.1	44100.7	38589	35277.9	39459	33153.5	33262.3	33775.2	30692	22498.8	34602	Other
1469	P40043	RGI1	23171.3	21680.7	23385.2	20142.6	21296	22500.5	11641.9	11228.2	11861.6	9171.51	9452.27	9367.97	4672.62	5895.55	5765.94	4392.43	4301.83	4384.02	4852.88	8612.88	5586.49	8681.09	8979.69	8146.62	6718.65	4305.9	5179.38	Energy
1470	P40098	FMP10	15104.1	15158	14538.1	14517.8	14651.9	14196.2	18449.8	17631.1	16767.3	18616.6	21089.9	22079.8	11934.5	17207.4	15727.2	17432.5	17427.2	17437.8	16987.4	16433.1	17863.5	14599.4	14611.2	13274.3	14030.4	9513.99	13207.9	Mitochodria
1471	P40160	RIO2	1722.96	1490.39	2170.33			1567.27	2387.58	2406.4	2460.21	2622.25		3038.94	1668.18	2527.99	3496.62	2650.05	2832.61	2654.46	2499.98	3028.87	2747.32	3112.6	2868.02	2831.17	2554.44	2340.27	3534.21	Other
1472	P40202	CCS1	6894.9	7098.05	8745.69	7416.17	7556.02	7385.45	10311.2	9630.5	8414.06	11120.6	11873.1	13851.4	7475.52	10933.8	10913.5	11850.6	12655.5	12185.3	10632.9	11971.5	10971.3	13500	12714.4	12450.6	12148	11161.7	16421.4	Mitochodria
1473	P40535	CST6		732.398		1094.89	1036.23	1127.52	2037	1755.68	1847.94	1768.3	1912.5	1990.39	717.955	1448.46	1596.52	995.404	1457.5	2114.27	1086.48	1276.6		977.935	1154.15		731.504		910.41	Transcription
1474	P40545	HIS6	2867.53	2665.69	2877.15	2146.83	2514.41	2478.18	2495.1	2831.29	2549.05	1881.38		2742.94	1599.74	2182.68	2318.2	2114	2558.37		2149.04	2756.57	2455.93	2734.28	2851.29	2979.67	2681.21	1973.51	3514.52	AminoAcid
1475	P40553	DOT5	7682.74	7536.94	7485.66	6366.41	7153.1	6884.06	10318.2	10061.7	10160.6	11280.6	11751.1	12157.3	6533.41	10436.5	10710	10300.5	12515.7	11660.7	10396.9	10780.5	10432.7	8778.97	9089.07	7495.11	7435.32	6284.58	6835.72	Other
1476	P40579	YIR035C	2693.18	3131.73	3545.13	2870.68	3419.64	2545.6	2618.66	2447.26	1849.73	1278.12	2910.33	2048.1	817.017	2074.52	962.277	2639.24	1889.6	1743.85	2403.03	1885.46	1485.98	1595.35		1336.6	1547.5		1281.15	Other
1477	P40858	MRPL49	6999.03	7717.26	6726.4	8934.76	8424.43	8236.84	14750.2	15852.9	15013.2	17191	18691.9	19571.8	11997.1	17769.2	14664.3	20585.2	20199.9	21106.3	22995.2	25362.4	23688.6	25505	26409.4	24008.9	24742	17961.4	27467.8	Mitochodria
1478	P40896	YJL213W									1670.34					1623.46				1342.68			1688.05		2011.78	1553.46	2968.14			Translation
1479	P40970	LCB2	3976.39	1940.71	3648.1	3401.75	3471.52	3199.45	3348.38	4794.31	4541.56	3462.57	4385.59	4684.41	3083.22	3274.22	3235.21	2870.4		4835.6	2057.74	3487.1		4238.46	3009.11	3728.91	1110.66		3076.98	lipid metabolism
1480	P41543	OST1	6012.64	5414.11	5338.98	5624.76	5649.33	5409.05	6936.96	7621.43	6596.56	6487.1	6925.32	8714.35	4395.78	5406.88		5388.06		6476.51	5728.88	5769.22	5318.6	5456.08	5233.11	6028.82	5395.45	5117.76	7412.96	ER
1481	P41814	GCD10	834.433		1933.13	1026.68	882.034			1260.58		1499.34	1480.06	2024.03	874.398	1542.74	1352.12		1134.98	1521.22	1714.41	653.932	1728.86	1738.19	729.726	1803.72	1403.5	789.97	2301.95	Other
1482	P41896	TFG2	3045.44	3052.49	2578.35	3119.91	3858.11	3118.45		5071.64	4036.38	4459.38	4938.97	4244.18	2526.33	3533.94	4159.64	4139.31	4371.82	3874.2		4391.13	4113.29	3793.96	3900	4356.3	3412.52	3339.64	3523.71	Transcription
1483	P42847	MRPS18	2227.38	2176.91	2701.43	2656.95	3493.46	3154.78	5303.14	5860.95	5435.85	6089.33	7728.51	7339.09	4293.22	6193.89	6714.31	6633.4	6788.84	7056.66	7731.24	7011.5	8061.1	9817.02	9430.66	8966.88	8166.22	6685.01	9473.93	Mitochodria
1484	P42942	YGR210C	2029.58	1789.3	2100.81	1895.56	1948.3	1460.14	1719.67	1991.28		2046.08	2204.32	2270.95	1421.69	2079.4	2059.63	2477.36	2295.27	2373.45	2293.72	2744.31	2606.25	2538.24	2393.43	2525.49	2416.46	1728.44	2683.33	Other
1485	P43569	CAF16	3090.11	3317.48	3510.37	3477.85	3272.97	2694.66	4349.65	4373.09	4491.5	4591.58	5065.03	5168.82	2733.56	4297.19	3640.16	3606.47	3625.65	3764.64	2919.64	3345.91	2658.5	3203.85	3190.21	3005.84	3051.54	2366.25	3793.55	Other
1486	P43619	BNA6	14069.2	15050.1	13621.6	11730.3	12581.1	12888.6	12253.1	12838.8	12272.4	13168.4	14155.6	15187.2	9535.23	13138.3	13121.2	12601.1	13235.1	13313	13422.7	14276.5	13115.8	12372.9	12773.7	11608.6	10615.7	8003.82	12048.4	Other
1487	P46683	YAR1	10843.6	11581.7	12199.8	10181.3	10731.3	11593.5	13536.1	14397.8	13553.7	14662.2	16268.6	15853.2	8883.93	13863.1	13019	12909.6	13434	13159	12624.5	13887.9	12850.2	13814.3	13224.4	13500.4	13257.3	10543.7	15622.6	Other
1488	P46982	MNN5	1032.82			1092.82	432.211	633.025		1037.23	1095.86	1234.83	2924.23	1995.5	892.504	1244.69	2105.89	2036.27	1382.84	2176.61	1199.26	1014.48	1679.17	1090	1579.21	1010.77	1035.34	873.673	1324.84	Other
1489	P47015	AIM23	330.373	365.429	316.091	437.228	535.804		744.738	720.199		589.879	727.764	636.753		585.336		535.014	678.449		680.896	799.918		713.683	686.834		618.71	425.968	496.466	Mitochodria
1490	P47031	IML2	782.297	746.335	842.34	958.829	848.358		1061.72	876.627	952.658		922.849			1056.18			678.678					561.86	666.113					Mitochodria
1491	P47119	HAM1	11389.6	10630.8	11436	10495	10996.4	11202.9	14323	15556.2	14127.5	16916.3	18733	18229.6	10584.6	16141.5	15772	20640.7	18233.9	17019.2	17247.2	17082.6	16910.9	16840.5	17943.6	16341.5	14694.8	12422.6	17846.7	Other
1492	P47154	STE24	1482.9	1137.69	1218.2	1468.73	1067.36	1104.19	1308.3	900.653	951.901	1008.41	1010.48	1347.79	719.832	743.215	845.919	677.599	815.546	772.178	778.171	733.967	674.175	1078.31	727.373	698.647	514.824	555.351	725.82	ER
1493	P48365	GYP7	2242.65	2052.1	2134.83	1440.36	2002.26	1710.01	2264.36	2311.11	1971.35	1998.95	1890.42			1650.77			1787.1		1210.81	1376.05	1294.55							Other
1494	P50105	TAF4					700.855				903.769			1132.8			1355.42			1176.38		1187.92	1083.94		1063.68	1023.87			1577.07	Transcription
1495	P50896	PSP1	2178.96	1935.79	1824.16	1582.19	1555.69		1993.75	1818.63		1872.2	1880.11	1943.04	1146.4	1723.96		1451.63	1521.93		1231.12	1846.28		1789.29	1918.27		1643.85	1173		Mitochodria
1496	P51998	YML6	2238.72	2040.08	2508.21	2560.47	2999.59	2562.86	5025.76	4888.3	4957.58	5433.55	5873.8	5952.09	3856.41	5605.28	5438.66	6268.29	6584.71	6652.91	7239.51	7888.17	7855.47	8376.6	8193.57	7942.2	7461.58	5897.56	8129.52	Mitochodria
1497	P53040	TAF6	991.803			890.774	1014.85		2179.28		1478.57				880.423	1250.96		1420.48										1025.71		Transcription
1498	P53141	MLC1	15248.5	14784.4	16192.3	15502.7	15135.8	15926.7	19688.4	19390.9	19669.8	20539	22848.4	22447.5	14498.2	23196.8	20667.4	18655.9	23673.8	22167	22328.3	23209.6	22623.5	23424.2	24422.4	23278.1	20918.9	17488.3	25603.8	Other
1499	P53163	MNP1	11602.8	11592.8	11742	12939.5	13056.1	12723.5	21874.6	23488	21943.8	24757.4	28088.6	27983.7	17601.2	27293.7	25897.4	30443.6	31492.3	32217.9	34560.1	40860.1	33925.1	41134.4	43135.5	39050.9	36186.9	28332.5	39842.2	Mitochodria
1500	P53172	SDS23	4984.44	5405.44	4608.19	4520.78	4519.93	4459.52	5466.68	6489.43	4547.99	5415.25	5519.66	6043.82	3723.41	5408.01	5199.33	5210.41	5460.63	5296.13	5084.79	4608.64	5200.25	4905.77	4889.47	4720.45	3950.5	3204.66	5023.31	Other
1501	P53206	YGR012W	2480.54	2030.66	2297.45	2415.27	3193.55	2944.11	3543.14	3578.81	3058.11	3394.73	3853.19	4031.11	2245.05	2738.44	2425.72	2646.8	3145.47	3051.49	2749.93	3221.26	2791.83	2819.21	2860.2	2905.7	2534.51	1648.05	3364.67	Mitochodria
1502	P53220	TIM21	3849.85	3825.74	3885.54	4065.65	4038.62	4258.55	4296.39	4611.63	4159.47	3448.05	5332.56	5058.98	2469.29	3608.52	3508.15	2816.08	3693.68	3080.29	2883.77	2992.61	2372.84	2543.32	2698.63	2053.54	2303.83	1764.81	2123.09	Mitochodria
1503	P53236	RSC1				261.891																			371.824					Transcription
1504	P53250	TWF1	7626.27	8152.16	8255.53	8438.46	7464.21	7609.29	8762.87	8184.82	8472.04	8323.33	9037.67	9074.27	5366.29	7211.33	6321.99	7165.42	6838.71	7015.03	6643.13	6068.83	6693.32	6433.99	6025.78	5607.23	5186.02	3930.23	5614.16	Other
1505	P53265	YGR111W		820.776	771.11	940.111		1002.1						3241.23						2907.58	2021.38	2290.4	1690.32	2414.55		2451.66	1239.37			Other
1506	P53315	SOL4	4410.81	4778.24	4185.92	4812.79	4432.13	4413.74	3548.27	3582.51	3011.23	2528.19	2472.03	2261.35		713.088			134.15	478.542	178.362	199.159		136.362						Energy
1507	P53615	NCE103	12558.6	11692.5	11716.5	15008.2	17337.1	20316.3	29366.2	31963.1	29248	19512.9	25665	22123.5	10808.6	13039.9	18144.5	12708.1	9835.85	14601.3	11393.9	9356	12746.4	9776	7522.19	9847.75	7789.69	6963.1	10195.2	Stress
1508	P53617	NRD1	3458.78	3477.28	3924.98	3948.03	4064.1	4160.1	5578.16	5708.04	5368.99	5529.98	6908.89	7258.94	3470.38	5430.22	5500.08	4949.35	5103.27	5061.93	4861.29	5320.17	5296.3	5032.84	5147.08	5327.61	4676.32	3861.58	5812.08	Other
1509	P53843	IST1	1053.49	1082.44	754.094	1173.94	840.347	937.147	1140.93	1551.81		4949.2	1131.78	1196.26				825.382	591.99	4097.59		619.511	1022.97	555.588		670.527	718.397			Other
1510	P53879	RHO5	3692.89	3783.2	3194.72	3923.2	3616.78	3435.4	3402.53	2426.35	4047.15	2694.02	2203.26	2769.02	1308.56	1371.39		1076.66	903.613	1348.73		1038.72	1100.43	1689.88	1237.48	1299.23	1001.67	944.09	1941.76	Other
1511	P53909	AAH1	908.085	1154.9	944.387	1366.92	1797.1	1692.21	2967.76	3100.27	2546.3	3991.69	4803.43	4796.66	3342.94	5248.11	5036.18	5480.98	6082.6	5730.66	6262.09	8040.18	6589.15	9265.77	9316.79	9400.05	8926.8	7830.35	12385.8	Nucleotides
1512	P53927	NOP15	7288.41	6873.47	7388.87	7814.82	7799.99	7748.87	12017	12918	11465.1	13966.4	15318.6	14891.2	10144.5	15008.3	12900.7	14045.1	16070.9	15622.8	15911.8	14017.2	14914.3	14357.9	15272.5	14498.4	13672.5	11860.7	17445.8	Other
1513	P53959	COG6		331.773		163.822					220.107																			Other
1514	P53968	CRZ1	833.347	740.615		1025.69	978.969	720.495	1178.48	657.007	829.014	799.384	850.243	969.661	450.787	691.546	744.683	642.247	729.057	680.175	588.184	651.972	725.745	561.06	545.431			424.514		Transcription
1515	P61830	HHT1	18906.2	23223	18175.6	27950.3	26093.4	19427.8	35876.3	40693.9	33007.9	38740.9	49240.8	46584.5	24355.5	37882.3	38053.4	38173.3	38725.4	37587.8	33003.4	35350.6	31478.5	37571.9	35145.4	35028.1	36992.8	24013.8	36577.9	Other
1516	P80235	YAT1	9541.2	9729.19	8978.47	9426.8	9735.66	9571.58	11932.5	12036.7	10402.5	11987.8	12925.3	13520.1	7690.76	10762.9	10869.7	9892.68	9835.08	10041.3	8304.61	5905.46	8640.6	2830.68	2814.45	2495.26	1591.85	1203.27	2277.92	Mitochodria
1517	Q01329	PTA1	440.938																											Other
1518	Q01855	RPS15	146699	149815	152960	152427	164398	168671	223340	221649	221124	241161	269529	282632	165495	239348	235213	252290	259861	272305	262540	301338	269970	321651	326700	319811	301382	249979	373179	Tanslation
1519	Q02933	RNY1	1059.08	1224.88	1220.83	936.682	1013.18	994.402	628.665	1192.95	770.544	730.146	616.789										175.49							Stress
1520	Q03103	ERO1	2187.69	2143.12	2229.62	2137.53	2289.1	2252.4	2797.74	3231.49	2550.5	2510.25	2500.83	3158.21	1709.98	2165.87	1951.9	2012.73	2127.61	2164.91	1975.43	2378.27	2424.47	2153.69	2142.94	1992.09	2309.74	1680.92	2766.89	ER
1521	Q03219	YMR178W	2910.95	2846.06	2999.48	2571.8	2616.19	3012.29	3436	3431.27	3380.24	3824.33		3797.2	1864.17	3114.69				2945.54	2288.78	2372.02	2684.95		2637.45	3213.51	2715.16		2419.59	Other
1522	Q03656	SKY1	601.206	1012.2	582.533	665.892	818.953	617.986	834.139	927.718	854.62	702.618	1559.03	1568.2	521.46	932.049	775.675	717.405		1051.34	1323.05	1010.56	823.536		1273.76	1565.67	1243.8	1065.2	1929.84	Stress
1523	Q03976	RSM24	1596.36	1590.73	1640.62	1488.22	1539.85		2115.66	2922.22	2520.5	3129.2	3096.55	3333.31	1828.4	3087.33		3082.71	3422.26	2987.62	3438.26	4326.49	3445.81	4579.33	4750.6	3473.56	4309.16	3090.67	4008.52	Mitochodria
1524	Q04178	HPT1	39886.3	38171.4	39120.1	40389.6	41249.4	40761.1	52012.3	47773.4	47798.3	60636.7	58703.2	67687.4	41513.5	54083.2	59923.4	62928	62597.8	68292.5	63168.1	58291.2	63712.7	58414	53124.2	56098.6	48328.7	37419.3	65484.1	Other
1525	Q04935	COX20	2481.48	2379.99	2447.87	2464.82	3060.8	2366.91	3732.92	3326.11	3409.89	2964.67	3887.42	4595.52	2183.03	3371.8	2986.85	1839.21	3032.58	2863.17	2405.34	2993.27	2864.25	2468.44	3190	2784.64	2732.24	1948.32	2539.62	Mitochodria
1526	Q06169	PEX30	372.358	352.993	325.954	342.021	301.453	349.358	355.24	306.292	330.245	261.657	300.973	448.315	175.183	246.355	219.431	223.248	210.897	207.546	209.619	202.045	190.27	157.154	194.246	159.759	144.339	165.95		ER
1527	Q06205	FPR4	8687.88	9568.58	8761.53	7530.41	7303.67	6853.31	7774.88	8187.9	7771.31	8369.03	8986.51	9665.31	5258.85	7309.14	7622.99	7895.9	8104.75	7695.12	8124.44	7652.4	8051.52	7808.11	7629.09	6888.51	7114.78	5739.88	8666.39	Other
1528	Q06639	RSC3										485.194	674.698	546.407				377.312		332.472						371.82		321.136		Transcription
1529	Q07500	NDE2	4240.08	6357.75	5196.69	4720.89	6211.96	6778.05	5815.8	5594.83	5485.57	3501.49		3273.87	1699.12															Mitochodria
1530	Q07623	NOP6	2341.62	2066.86	2478.39	2214.3	2692.76	2409.29	3394.88	4609.62	3192.41	4059.25	4635.89	4372.67	2946.72	4733.9	4005.43	4503.29	4564.08	4231.65	4352.69	4151.71	4444.72	3933.75	3722.36	3545.31	3573.72	2947.89	4493.27	Other
1531	Q07688	YPD1	2892.69	2708.23	2740.65	2802.6	2871.9	2761.22	2959.5	2986.65	2569.88	2634.42	3032.02	3186.1	1947.01	2484.21	2628.22	2800.31	1763.27	2723.88	2846.58	3076.82	2604.2	2897.73	2653.86	2664.51	2436.91	1366.29	2724.39	Stress
1532	Q12008	GPM2		1891.15				1393.08					1136.86																	AminoAcid
1533	Q12012	YOR289W	5293.43	5168.97	5652.32	4904.44	4647.38	5837.01	3615.03	4540.78	4820.24	4264.01	4023.54	3830.02	1944.78	2054.8	1755.76	938.728		1898.34		1342.37	1091.78		1719.27		2250.2			Other
1534	Q12149	RRP6	1446.41	1325.65	1901.47	1472.55	1845.7	1543.89	2052.35	1901.68	2233.3	2508.92		3637.67	1779.08	2266.77				2628.07	2657.46	2693.74	2555.79		2812.83	2767.44	2389.46			Transcription
1535	Q12242	RUP1	1589.64	1752.64	1026.9	1546.32	1662.35	1475.39	2152.22	1478.76	2097.93	1391.17	1200.9		1060.72	1753.82			1095.36	1173.13	836.554	1406.86	1016.33		1063.89	1317.81	761.1	649.518	1128.46	Other
1536	Q12404	MPD1	882.269	752.864	633.765	636.055		758.765	972.883		1110.02	613.457	1935.88	1576.93	746.339	890.938	914.012			1141.56	1168.36		767.955	1315.09		854.253	666.836			ER
1537	Q12524	PCD1	443.796	284.426	382.634	179.387	191.387	292.428					195.569	177.415	52.443			71.3069	149.533					100.806			86.9827			Stress
1538	Q3E846	COA6	8708.8	8009.99	9095.77	8586.96	8608.86	8482.18	10243.7	11161.3	11042	12869.1	11621.5	12447.6	7538.69	11154.6	10269.4	11536.3	11062.5	11571.5	10975.7	12915.2	11865.8	12457.6	12154.2	11915.9	10658.4	7930.86	11360.3	Mitochodria
1539	Q96VH4	HBN1	7051.46	8292.44	8364.88	7893.93	7551.86	7900.88	8629.16	8957.87	7913.04	9510.01	10954	11594.8	7097.6	9839.31	12353.2	9505.17	9609.27	8814.55	9588.42	7821.27	8806.41	7518.36	7164.38	6121.99	9121.46	5717.38	8573.07	Stress
1540	O14455	RPL36B	273786	267708	283172	295944	277917	297211	370209	392557	398922	433274	489599	454728	289999	459214	405990	440580	488425	467818	509117	546232	504807	571646	587658	570612	540073	439444	678052	Other
1541	P05744	RPL33A	37522.3	33731	30829	34938.5	39288.5	37711.9	55587.1	53445.2	45383.1	48802.4	62438	65663.1	36216.8	50079.4	48979.7	55617.3	57134	57130.8	56428	60947.1	54979.3	65514.9	64577.2	62081.8	59424.3	48271.2	74201.6	Tanslation
1542	P06633	HIS3	10441.3	9996.96	10889	13194.8	14087.3	15254.4	21189.9	22183	21499.8	24227.7	24122.5	23955.9	13621.8	17768.7	19117.8	15404	14647	16570.6	14868.8	14694.7	13670.3	16197	16378.8	16627.1	15356.3	11568.3	18722.6	AminoAcid
1543	P07266	MRS1	455.737	387.548	403.567	289.829			545.797	70.4315	400.706	450.115		619.261		502.481			204.604	723.716	250.388	486.472	581.11	341.287	673.566	592.298	232.383			Mitochodria
1544	P0CX26:P0CX25	RPL43B	182889	181209	207133	204510	193607	204210	255704	275216	271932	294415	321575	331396	207466	311642	280119	328824	339278	344817	340008	369632	347215	405028	403592	393865	361049	308288	483320	Tanslation
1545	P0CX28:P0CX27	RPL42B	92245.4	87674.7	102550	109255	110473	111049	126550	124875	144898	143102	165113	168004	99512.8	136341	142869	156147	165291	159715	166897	170497	168309	179349	180224	178772	172203	139861	208869	Tanslation
1546	P12611	WHI2	2371.62	2749.72	2476.2	2830.87	2384.13	2345.52	3630.51	2364.8	1928.69	2769.46	2613.04	2223.74	1474.16	1775.19	2059.97	2089.6	1875.88	2244.01	1860.55	2178.24		2032.48	2260.52	1845.49	1481.47	1200.7	2341.88	Stress
1547	P14063	MRPL31	10083.7	8780.31	8585.56	10008.4	10428	9695.24	17954.1	16453.7	13738.3	18165.3	19990.9	19103	13030.2	18447.9	18065.3	20942.7	21523.9	21600	22988.9	26420.4	22952.1	27313.1	27360.2	24413.6	25459.1	21258.2	24579.5	Mitochodria
1548	P15436	POL3																	314.718		185.017									Stress
1549	P17065	SEC2		714.495		735.224	1103.63	367.502		859.31	685.81	783.389		1031.83	572.523	748.196				775.835	692.786		760.78			780.304	812.297			Other
1550	P19955	YMR31	27812.2	29131.1	32541.1	33543	33692.3	34841.1	41755.7	43559.4	41624	44119.6	42491.4	48734.2	27949.8	41747.1	39253.1	40440.7	44170	42826.6	42549.7	51792	42551.2	46508.4	49105.3	43338.7	38552.2	28165.2	37949.5	Mitochodria
1551	P20433	RPB4	3460.63	3639.73	3685.21	4078.71	3490.81	3628.09	4422.64	4741.34	4306.87	3956.32	4688.7	5040.11	2846.52	4193.43	4127.53	4311.89	3513.51	4072.95	5294.99	4189.14	4357.99	4258.48	4862.88	3898.3	3782.11	3077.82		Transcription
1552	P20484	MAK11	3218.17	3000.44	3118.16	3285.36	3364.24	2984.32	4404.92	4288.23	4114.17	4580.07	5418.93	5439.25	3114	4763.91	4767.52	4610.77	4875.79	4769.07	4232.07	4867.9	4631.78	4768.99	4795.4	4192.85	3943.82	3642.99	5359.36	Other
1553	P21801	SDH2	40006.6	39599.4	38796	48715	51217.6	54929.6	60885.5	61793	58545.8	68480.1	71844.8	78356.5	46652.9	73392.5	67507.5	76526.2	84040.5	77058.5	75481.4	89126	77671.7	76013	80756.5	72730	61641.9	46607.4	60264.2	Mitochodria
1554	P22133	MDH2	24495.6	25174	23487.2	23088.1	19248.4	19726.7	16330.6	14373.9	14041.9	13790.5	14983.6	14746.9	8408.47	9518.01	9051.35	6756.92	6154.75	4877.86	5169.17	4236.74	5421.84	1626.78		1084.8	1936.29	1275.04	2771.15	Energy
1555	P22134	MAG1	1346.1	1173.48	1151.68		1154.51		1649.87		1198.31		1756.46						375.284			1195.9					1084.39		1070.99	Stress
1556	P22136	AEP2		339.681	308.125	307.092			591.174	499.459	410.569	453.151				531.896					333.945	558.049				534.569				Mitochodria
1557	P22141	PRE1	31395.8	34626.6	33063.5	33289.7	33493.5	34793.8	34584.8	36655.9	35423.6	35471.5	37989.4	38665.1	21835.9	29824.3	27410.9	27008.4	29194.8	28338	27605.8	27015.2	28200.3	25956.7	26311.8	24998.3	23863.7	19517.5	27903.1	Other
1558	P22146	GAS1	21433.2	20866.7	21829.8	29513.7	27335.4	30385.1	43796.2	47792.3	42572.1	44676.1	59512.3	60342.4	32219	47711.3	48840.7	49909.8	54405.8	54284.9	44565.5	49898.6	47514.8	45936.5	46771.4	43130.5	39014.4	35941.2	48946.8	Mitochodria
1559	P22224	SEC15		166.667			272.275						302.615		110.318	265.203					443.084			342.523			245.665			Other
1560	P23293	SGV1	710.17	651.39		709.135	616.593																							Transcription
1561	P24784	DBP1	4783.02	4675.51	4771.08	4044.43	3596.28	4386.42	3086.27	2607.16	2981.68	1205.57	973.124		1139.6						956.012									Translation
1562	P25045	LCB1	2514.05	1836.6	2392.49	2546.94	1989.86	2514.07	3186.07	3132.67	2784.16	2780.24	3523.63	3691.96	1983.9	2607.28		2441.19	2673.97	2967.35	2677.41	2850.42	2970.87	2762.71	2492.49	2497.27	2276.94	1890.63	2674.09	lipid metabolism
1563	P25441	RPC53	448.805	414.239	496.544	399.11	437.895	422.289	530.01	563.54	537.35	608.379	727.087	650.189	480.257	660.57	620.617	646.495	702.571	749.162	677.549	730.938	694.341	797.236	683.766	685.316	731.323	603.689	958.018	Transcription
1564	P25555	GBP2	3563.01	1487.22	2007.5	1553.58	1901.85	2453.15	4593.35	4048.12	3902.6	4586.56	4862.92	5456.24	2889.9	4564.15	3941.61	4559.6	3280.35	4708.67	4745.21	5240.39	4467.89	6515.04	6738.07	6273.28	6084.01	4377.94	7412.26	Other
1565	P25569	GID7	2407.51	1350.76	1482.76	2455.79	2428.3	2301.31		2321.57	1918.22			3360.81	1063.93															Other
1566	P25573	MGR1	701.184	759.654	600.34	736.422		660.377	714.956			839.968	993.881	1026.48	636.067	677.829	626.307	721.961			650.987	599.359	1148.82				450.203		582.362	Mitochodria
1567	P27637	BUD14	271.352	397.452	257.687	262.705	296.521		285.966	423.764	248.181	477.474		427.583	351.141	400.816	345.584	803.701	412.988	486.109	509.089	555.217	470.024	365.04	319.795	406.877	486.013	238.09	406.951	Stress
1568	P28000	RPC19	4796.35	5293.07	5960.34	5760.51	5879.34	6109.98	7368.48	8497.71	6708.48	8845.61	11432.2	8768.91	4555.05	9016.83	8002.95	6904.54	9174.41	9438.13	9877.28	9297.96	8734.52	9747.87	10050.8	7085.85	9547.59	8210.87	10969.1	Transcription
1569	P28495	CAP1	26437.5	24223.5	26733.1	24609.3	23084.2	24444.4	22576.6	24569.2	25912.2	25563.8	25106.3	28465.9	15301.2	21263.9	20809.2	21754	20634.1	20235.7	17872.1	16575.9	19128.2	18870.6	20563.2	18156	17195.3	12499.6	18283.9	Other
1570	P28737	MSP1	1020.85	999.255	698.872				1452.91	1986.34		2591.42		2827.54	1633.55	858.711		1755.73	2094.07	2217.8	2469.22	1318.85			2474.82		1925.73			Mitochodria
1571	P28778	MRP17	6353.89	6643.6	7541.74	6951.86	8009.3	7791.19	14145	14252.9	13163.1	15877.1	16726.2	15415.3	8825.94	15807.7	15405.5	17999.4	17952.9	18889.4	18356.4	24115.5	25937.1	25353.4	25846.4	22074.1	22602.2	17330.8	23050.8	Mitochodria
1572	P29295	HRR25	1025.38	1068.52	1217.24	1389.2	1328.25	1149.71		1101.62					864.644	433.782				2246.71	538.858	470.747			1215.99		402.286			Stress
1573	P32353	ERG3	3817.21	2677.75	3749.7	8793.61	9185.03	9292.07	26723.4	26242.1	25203.4	24044.4	23817.7	30216.4	14354.7	16393	17129.2	8924.68	8963.48	9370.55	6300.41	6568.9	6334.12	7482.95	6863.62	6852.35	6217.04	5723.84	6964.21	lipid metabolism
1574	P32469	DPH5	7102.14	6776.23	6830.16	6166.59	5877.01	5988.49	7500.31	8039.95	7841.19	7614.24	8640.28	8936.19	5758.23	8553.58	7278.03	8050.1	10360.4	8090.95	9010.88	8890.34	8638.73	9411.52	8938.53	8748.49	8652.33	6109.34	9959.72	Other
1575	P32474	EUG1	3277.47	3720.63	4033.6		3001.93	3717.99		3462.81	4040.97			2916.65							3175.64		2367.41		2291.96		1380.77		2662.84	ER
1576	P32505	NAB2	2417.91	2567.82	2239.83	2558.84	2341.63	2031.9	3191.91	3143.98	2921.8	3199.36	3782.98	4015.61	2106.5	2927.08	2969.31	2954.69	2909.81	2935.63	2791.6	3188.95	2881.15	3077.63	3195.2	2857.39	3031.85	2276.41	3286.97	Other
1577	P32583	SRP40	6911.68	5471.59	5942.44	5493.9	5626.27	8962.77	7081.44	8409.96	12496.8	8394.54	9863.31	9788.32	6579.66	9056.93	8435.8	8030.43	10255.4	8584.27	7005.44	9563.02	8308.84	9859.29	11072.4	8253.94	11183	8670.82	13755.1	Other
1578	P32606	PET127		327.864		41.9418			412.221				612.342		79.814	493.839		486.167				586.775		107.107			88.3603	371.291		Mitochodria
1579	P32629	ANP1	1034.46		378.322	1890.86	970.81	1107.01	1256.87	1312.57	1192.55	1070.8	1362.67	1313.99	697.654	879.641			924.37	943.082	799.763	953.659	911.62	809.853	1032.15	932.841	943.585	783.975	1093.66	Other
1580	P32793	YSC84		13779.1	12321.7	11888.9		10849.9	13092.1	11711.3	11129.2		12618.2		6582.37	9000.39		10685.9	7431.18		8740.46	8590.67	7537.36			7635.44	7601.36		9952.9	Other
1581	P32860	NFU1	10426.4	10765.8	11454.7	9723.07	10906.4	10952.5	11724.1	12762.4	11753.6	12775.7	13972.7	14854.5	8378.89	12147.5	11649.7	10994.4	11607.3	12272.3	11107.5	11960.1	11256.3	10652.6	11426.1	10754.1	9865.28	7881.06	11688.1	Mitochodria
1582	P32864	MRS6		897.287			1216.66									2288.87			2160.93	2120.46			2142.47		2283.87	2171.04			995.113	Other
1583	P32897	TIM23	9541.83	9715.69	9904.32	10733	11679.3	10844.6	14006.6	17922.7	16056	18167.4	19865.3	20983.5	12279.6	20164.6	19360.3	20352.4	22112.9	22663	25323.3	28633.8	25454.4	29405.6	29039.9	28309.2	22836.4	19985.6	26529.9	Mitochodria
1584	P32902	MRP4	1780.56	1767.65	1660.97	2446.04	2079.06	3221.94	3272.71	3585.51	3565.37	4276.21	4656.71	4926.22	3325.98	5108.44	4616.66	5057.2	5842.6	5591.52	5888.03	8461.7	6564.99	7940.39	7885.29	7544.95	6857.91	5169.37	7487.99	Mitochodria
1585	P32904	MRPL6	4796.5	5439.84	3135.68	4097.34	3512.74	4194.64	6046.2	5593.19	5394.36	5778.37	6495.46	7835.51	5560.56	5627.89		7990.9	7858.97	8145.27	7631.54	7297.53	8892.02	8323.51	8297.27	7606.57	6057.47	5850.63	8969.95	Mitochodria
1586	P33202	UFD4	318.937	262.186	343.035	380.047	318.382	210.32	343.705	319.57	361.127	264.457	339.877		129.126	204.041	129.016	190.919	165.818	128.285		167.131	148.788				165.732	121.248		Mitochodria
1587	P33417	IXR1	2459.57	2250.47	3521.78	3013.41	2920.78	3401.63	5551.84	5803.78	4883.38	6323.86	7103.38	7042.28	3920.29	5793.47	5970.88	5735.88	5725.12	5523.78	5669.41	5617.62	6521.16	5479.65	5580.1	5565.89	4939.9	3737.46	5652.41	Transcription
1588	P33767	WBP1	3580.9	3495.11	3951.79	3646.85	3371.73	3930.05	4523.93	5024.97	4317.11	3842.42	4635.09	5158.47	2540.02	3368.12	3253.35	3030.04	3593.81	3732.58	2996.84	3443.6	3073.35	3389.72	3254.33	3012.42	2929.21	2648.76	3502.94	ER
1589	P33893	PET112					6959.89																							Mitochodria
1590	P34163	TGL1	493.231	522.833	308.038	359.575	219.015	272.797		164.214																				lipid metabolism
1591	P34221	PTC3	9850.66	10221	10688.9	11727.6	10325.2	10575.8	13335.9	13658.5	13884.2	13659.4	14603.1	15396.5	9240.56	11809.2	12266.7	11711.4	12225.6	12662.2	12097.7	12553.1	12218.1	12660	11372	10863.8	10106.3	8200.53	12251.8	Other
1592	P34223	SHP1	10941	11486.6	12056.9	10754.5	10945.4	10770.8	11311.1	11762.3	11673.3	11624	12095.3	11893.8	6677.38	8933.35	8702.1	8321.54	9398.8	9320.41	8201.02	9284.84	8674.41	9689.68	9753.37	9120.78	8826.7	7147.73	11007.1	Other
1593	P35176	CPR5	16641.8	14606.8	14382.7	14113.7	13735.6	14839.5	17461.1	17653.7	17167.1	17282.1	16948.7	17246.4	9996.55	14164.6	14244.2	13423.3	14136.1	14659.5	10892.4	9982.29	11277.4	9495.16	9789.34	8738.71	8669.74	6268.33	10314.4	ER
1594	P35184	SQT1	5937.56	5921.26	5865.98	5563.84	6004.3	5116.49	7932.15	7740.29	7080.17	6666.08	8646.06	9123.81	5762.1	7439.85	7842.52	8323.66	7983.04	7475.2	7433.35	6780.25	8012.46	9290.54	7463.28	8006.37	6593.22	6447.85	10066.2	Tanslation
1595	P35202	THI80	1237.21			514.015					1068.34								1052.05	1231.17						1351.62	1267.49	964.928	1053.66	Other
1596	P35723	YET1	10755.4	9429.34	10241.5	9056.63	7390.67	9788.04	5154.74	4065.95	9349.32		8766.52	8646.89	5333.01	6091.46	5601.1			5261.58			4301.35			2795.45		3203.03	3154.02	ER
1597	P36036	YRA2	3538.54	4590.93		4083.95	4674.3	2541.16	5225.26	5488.35	3129.81	5264.11	6085.77	5727.63	3410.66	5216.15	6324.88	5338.15	5465.21		4735.57	4839.82	5330.59	5385.72	5464.62		4985.38	3969.55	6003.09	Other
1598	P36144	UTP30	454.579		482.265		582.187		566.261	535.678	522.003			437.59		532.825			552.199			343.633	417.078		590.973				580.507	Other
1599	P36159	TRZ1	348.654													432.378		336.241			406.945	721.861		635.719		635.154	528.935	505.835		Mitochodria
1600	P37254	ABZ1								890.568												251.622								Stress
1601	P37262	SOL2	4476.34	4775.04	4726.97	4234.57	4031.21	4558.89	4760.04	4823.01	4781.14	4924.18	4321.67	5365.96	2861.7	4059.71	4367.18	4074.8	3267.97	3817.56	3324.1	3810.66	3213.76	3505.7	3540.16	3329.39	3185.48	2555.79	3963.24	Other
1602	P38122	ECM31	1213.08	1291.9	1255.39	1104.95	1385.26	1125.97	1182.36	1334.37	1281.94	1332.68	1195.15		923.021	1239.38		993.458		1116.66	1053.47	1324.38	1277	1239.36	1220.78	928.488	1446.65	866.704		Mitochodria
1603	P38199	HEK2	7763.28	7897.49	7048.47	8438.06	8266.91	8080.08	10799.8	11328.4	10329.1	11024.2	12528.4	11994	7190.75	9857.16	9984.61	9708.42	10603.1	10625.1	9502.43	10104.2	9840.55	10290.8	9998.26	10178.3	9504.1	7380.87	11628.2	Other
1604	P38221	CDS1	27580.4	24164.3	27015.6	31832.6	31585.1	30300.4	45469.8	45553.4	39105	41928.6	50539.1	58210.6	36478.8	44785.3	48009.9	50262.4	53688.9	55034	55827.8	52636	51885.6	52703.6	54843.1	44824.1	38611.3	38185.1	44788.4	lipid metabolism
1605	P38238	TRM7	2278.72	1985.99	1161.54	1984.84	2118.85		2208.68	2730.93	3336.62	2727.73			1584	2702.19			2769.18	2749.41	2729.34	2827.92	2580.29		3336.03	3261.57	2470.84		2558.48	Other
1606	P38251	RFC5	2138.61	1819.01	1872.23	2076.18	2010.89	1444.51	2377.23	2076.32	2029.44	3018.02		2377.18	1713.54	1904.25	2284.91	1932.65	1580.1	2535.76	2500.59	1724.76	2158.31	1909.88	2499.47	1839.73	1299.84	1213.86		Other
1607	P38321	YBR225W							252.033	382.306		385.64	295.037	558.163		158.561			319.212			244.758			337.638			259.272		Other
1608	P38344	REI1	1306.83	1466.52	1379.35							1624.7		2008.68		1531.64			1524.65	2790.99	2004.47	1989.3	3074.87	4041.41		2735.13	2313.8	1904.64		Other
1609	P38555	YPT31	6175.16	7272.17	6087.21	7695.04	8094.25	7898.66	10367.4	10952.6	10423.6	10011.8	12833.8	13704	7053.94	10139.6	9631.51	9154.72	10148.2	10155.1	9682.17	10654.9	9823.03	9899.16	10290.1	8904.7	8359.16	8137.81	10982.8	Other
1610	P38747	OTU2											583.078																	Other
1611	P38797	PTC7	1249.17	1617.11		1268.16	1647.56	2147.68	2604.18	2578.91	2922.02	1999.68	2471.09	2944.16	1676.72	1977.21	2077.44	1984.5	1981.59	2231.37	1752.35	2020.04	2186.54	2056.19	2019.8	1653.64		1637.01	1823.97	Mitochodria
1612	P38805	RPF1	345.233	345.843		391.128	385.257	343.291	571.132	608.152	513.21	658.922	779.487	671.285	469.396	755.362	807.449	712.923	750.647	578.07	742.511	909.001	801.961	802.651	743.503	702.688	758.954	635.442	767.813	Other
1613	P38885	AIM46	231.674	270.53	254.057	341.08	258.247	256.363	343.521	350.155	398.809				145.581			207.49		236.922	175.744	315.051	279.768	198.837			201.193	207.245		Mitochodria
1614	P38902	RPB11	13031.9	13270.2	12515.6	12194.2	12030.6	12473.5	15592.4	15731.8	14371.7	16984.8	17931.5	18434.1	11671.7	16303.8	15147.7	15965.8	16670.4	16709.8	15521.1	17458.2	16126.8	16485.5	16872.3	15756.7	14693.6	12465.6	18150.3	Transcription
1615	P38961	RRP8	1106.32		1193.37	1305.87	1306.78	1344.28	1734.89	1967.03	1646.74	1884.77	2302.18	2189.67	1173.15	1982.45		1674.12	2081.19	1789.52	1980.09		2035.85	1997.7		1954.04	2030.84		1855.75	Other
1616	P39715	ECM1	1556.2		3032.95	1804.24		3572.66	3446.32	5381.93		5255.43	5997.07	5608.31	3446.06	4337.33	3559.99	4935.58	4865.4	4615.98	4902.27	4543.31	4750.29	4550.66	5001.51	4540.4	5137.11	4347.97	4949.03	Other
1617	P39727	ERV46		733.926	651.965	825.348	764.819	574.223	1044.86	863.026	974.495	1166.56	1163.97	1335.59	761.37	737.257	962.516	932.227	833.359	1073.73	874.079	717.268	842.896	840.437	995.557	1059.41	818.039	579.535	1078.71	ER
1618	P39729	RBG1	3604.68	3670.71	3811.71	2999.26	3774.28	4518.86	4653.37	6717.6	5364.38	6611.26	6081.31	8361.6	5029.02	8827.48	7837.57	7643.29	9126.9	8665.62	8633.46	8494.25	9476	10019	8460.61	9201.07	7709.94	6544.95	11004.2	Other
1619	P39927	PTI1	1297.68	977.712	1280.96	1129.28			1536.27	1556.77	1257.61	1588.82		5370.4	1177.42					1552.31	1430.65	1301.02	1346.04	1380.54	1345.25				1504.35	Other
1620	P40051	ICP55			1625.96		1556.51	1498.73	1759.06	2087.9	1848.44	2219.8	2407.75	2742.78		1886.81	2116.61		1892.59		2083.53		3012.25	3063.51	2430.37	2578.77	2194.83	1926.93	2613.61	Mitochodria
1621	P40091	PEA2	322.094	284.254		348.665	361.663		515.6	698.142		586.701	779.256	702.874	541.264	639.282		586.875	667.423	667.379	669.044	643.36		727.595	668.098		608.391	429.903		Other
1622	P40161	RTT106	490.749	529.398	520.717	446.37	555.188	464.247		713.254		548.768			392.304	509.314					628.647	735.125	489.489		528.741	608.706	524.877			Transcription
1623	P40208	GID8	739.603	530.176		649.383	568.548		425.894	256.682	595.422	424.494	276.614							353.028		222.6			280.288					Other
1624	P40303	PRE6	24182.3	27729.9	28387.5	25556.5	27779	28687.2	27466.6	29492.7	28151.9	28363.5	29315.7	32247	16260.4	24844.4	24700.3	23690	24962.2	22547.3	20561.1	22653.9	21953.9	21328.9	21274.1	19918.4	18333.2	14529.6	24260.7	Other
1625	P40395	RIC1	159.148		205.929	77.5235		94.0792	90.2315			145.273			91.3391		122.043		173.77	159.024	173.002		163.281	170.679		159.333	144.608		156.959	Translation
1626	P40487	DPH1	211.737					257.531		321.944	310.275	285.564		301.51	252.073	293.927			368.868		280.81	355.202	350.279		326.89	417.393		278.87		Other
1627	P40496	RSM25	2578.38	2514.56	2623.01	2970.49		3462.63	5103.97	5496.37	5230.66	5164.64	6329.56	6910.44	3925.5	6332.88	6141.46	6475.02	7104.03	7906.1	7635.52	9625.18	8562.59	9134.91	10997.4	9447.62	8475.1	7293.96	10018.3	Mitochodria
1628	P40523	YIL055C	2412.9	1670.91	2114.2	1291.43	1491.03	1959.19	1460.04	2010.87	1418.1	1204.77	1332.63	1587.43	693.177	826.847			647.182	645.608			1075.54							Other
1629	P40893	REE1	16862	17100	16150.6	17301.5	17749.6	18725.8	19837.9	19107	17837.5	18558.8	19351.3	20624	11684	18434.8	15872.8	18165.2	19702.3	19599.9	17364.4	15113.1	17555.9	12842.5	12562.8	11530.1	10120.7	7155.96	9729.07	Other
1630	P40957	MAD1	360.128	284.053	352.126				484.676					545.64						388.032										Other
1631	P41832	BNI1									56.8877														83.5771					Stress
1632	P43573	BUD27	187.716	170.034	183.446	181.809		290.44	231.982	270.04	175.057	237.385			185.427			219.416		268.684		302.35	243.457		220.999	244.465	258.791		320.444	Translation
1633	P43586	LOC1	6738.78	6557.81	6323.49	7296.4	7891.24	8106.3	11581.1	12226.5	11045.7	13799.1	14807.2	15785.1	10124.1	14304.3	14259.4	15433.8	16258.3	15560.6	14719.4	12471.7	14589.8	12191	12199.8	11640.3	11233.5	8778.75	12784.1	Other
1634	P46677	TAF1												212.613					172.185								148.663			Transcription
1635	P46682	APL6	461.483		464.387	648.365	536.427		550.879	649.948		710.337				351.024											360.272			Other
1636	P47044	YJL055W	8038.8	7713.61	7975.11	8672.84	8824.33	8258.73	12521.7	14171.8	13315.9	15397.6	17461.5	17112.4	10203.2	15180.8	15920.6	15302.6	16463.8	15963.3	15354	16461.5	15568	16621	16426.8	15985.2	14769.4	11161.2	16982.5	Other
1637	P47102	GEA1																			62.2427		19.4938							Other
1638	P47173	YJR142W		1187.36		1115.81	1289.56		1493.04		1335.79	1311.3	1425.43	1524.94	737.313	931.77				1063.54	972.424			1034.95						Other
1639	P48589	RPS12	186701	195514	194702	203970	201923	213239	271641	273146	257880	297276	306642	346488	194348	265979	287938	291106	293170	332584	313592	331945	336419	381186	351529	374830	345611	262243	449908	Tanslation
1640	P48606	RBL2	17462.8	15588	16682.3	14931.9	15748.9	15386.6	18239.5	16746.6	16976.3	17386.8	19627.7	19342.1	11680.9	14826.3	15481.7	15831.1	14576.6	14345.5	13977.3	11979.7	14104	11272.4	11373.1	11469.2	11487.5	8214.23	11790.7	Other
1641	P48836	VMA10	33608.1	32947.4	32975	32284.1	30987.9	32512	40935.3	40950.3	40485.2	42253.2	43377.8	49083	28236.6	40756.4	40939	38543.7	41097.6	42759.1	36868.6	43318.3	39838.8	46491.4	48958.2	48069.5	43134.3	35858	56895.7	Other
1642	P50087	MIC26	3757.52	3511.42	3602.7	4436.26	4037.7	4013.31	6013.48	6912.61	5529.49	6629.86	7226.81	7564.01	4456.41	6270.81	5557.52	7161.47	7163.74	6974.01	7497.67	8576.2	7171.66	7453.5	7674.82	6716.36	6472.15	5016.83	6142.76	Mitochodria
1643	P52286	SKP1	15258	16307.3	15361.5	14591.7	16088.4	14247.6	15565.5	13566.4	17329.5	15087.5	14692.1	16210.4	9068.96	12146.8		12496.5	11852.9	12526.4	11395.7	10964.2	12098.5	8814.6	10227.6	8497.63	8392.2	6082.98		Other
1644	P53063	RAI1				657.978						692.698								644.439			828.736	843.997		828.758		614.935	956.683	Transcription
1645	P53107	YRB30	423.297		438.387	705.989					375.245	467.749	331.487	526.838	289.953	395.165	451.023		466.609	502.57	439.206			428.073					360.005	Other
1646	P53112	PEX14	1961.88	1799.75	2018.49	1960.89	1996.56	1937.64	2682.26	2711.66	2628.37	2640.05		2973.24	1742.06	2649.96		2528.68	2782.37	2565.05		2192.31	2592.95	2179.54	1767.94	1632.75	1785.03	952.666	1495.89	Other
1647	P53219	IMO32	1596.2	1769.82	1792.38	2232.51	1937.37		2081.62	2589.15	2169.89	2621.05	2924.11	6893.83	1958.65	2110.74	2197.89	2104.65	2772.43	2695.1	2843.54	2449.37	1843.17	2195.08	1847.06		1652.9	1599.55		Mitochodria
1648	P53759	DUS1							2551.14					1652.49	1621.82					2026.93			1986.99	1874.04				519.878	1327.17	Other
1649	P53847	DSL1	388.028		513.198	483.43						340.73	282.553		323.478					652.598		311.065								ER
1650	P53874	UBP10					325.708			744.683									291.101	599.677	792.262	977.684	814.261	1155.7	1156.97	533.644	720.525	469.763		Translation
1651	P53889	FMP41	7313.99	6036.32	6893.52	6925.47	6338.65	6518.66	8683.23	8080.87	7635.73	8374.75	8997.76	11414.5	5480.72	7362.58		6955.16	7381.91	7908.5	7644.71	6651.12	7685.51	6619.13	6842.47	5675.57	6172.53	5514.93	9179.87	Mitochodria
1652	P53925	YNL115C	2141.31	2054.91	1976.68	1860.27	1612.21	1828.1	1358.23	1465.07	1284.38	1158.66	1158.21	1445.42	631.198	875.439	629.659	442.746	492.094	558.048			335.053			325.813	284.803	300.181		Other
1653	P53941	IMP4	2377.89	2620.26		3082.42	3292.15	2911.66	4020.03	3894.37	4966.49	4749.03	4583.79	4900.27	3125.8	4710.62	5996.33	4704.7	5117.15	5259.53	5093.11	4957.21	6435.49	5715.53	5471.75	5773.33	5255.53	4553.45	6382.67	Other
1654	P53972	RCM1	130.888							212.231		290.318													358.474		493.738		438.768	Translation
1655	P54787	VPS9	311.962									314.35		774.032			556.068	575.099					485.526	589.547			568.377		581.17	Other
1656	P54858	DOS2	2088.5	1939.52	1432.68	2024.52	1776.64	1865.92	1837.09	1950.39	1886.11	1617.57	1521.93	2118.73	1271.36	730.808	3767.61	1549.97	1678.49	1686.75	1782.55	1713.68	1652.53	1810.24	1585.31	1648.05	1370.34	1307.71	1255.78	Other
1657	P69771	DID2	6542.27	6794.74	7889.65	6617.89	7219.68	7933.28	9394.75	8136.56	8998.72	10057.5	10167	11231.2	7672.06	9490.71	10188	10701.9	9451.4	11911.9	11564.4	10641.2	11961.6	10282.5	10299.1	10014.2	8202.58	6760.49	12805	Other
1658	Q00416	SEN1																											162.05	Transcription
1659	Q00873	CYT2	1035.96	1315.97		1421.37	1469.8	1425.01	2532.42	2965.03	2357.32	2895.55	3431.84	3314.13	2008.18	3003.03	2573.14	3115.08	3614.98	3289.43	3901.05	4848.01	3925.15	5055.24	5337.13	4686.88	5065.8	3862.77	5598.17	Mitochodria
1660	Q02256	YVH1	1305.04	1149.59	1220.73	1123.29	1112.39	817.606	1363.51		1380.06	1508.61	1632.17	1892.08	1092	1138.76	1045.87	1556.78	1661.86		987.689	1547.25	1904.44	1523.84	1772.37	1507.87	1773.09		1790.82	Other
1661	Q02629	NUP100			1100.4	1325.32				1707.88		1472.38			997.055													1044.35	1325.55	Other
1662	Q03246	MRPS17	5645.91	5355.93	6034.1	6485.95	6150.18	6987.33	11973.6	12570.1	11429.3	15346.5	12669.6	15174.9	9223.19	15894.3	14788.7	15989.7	15586	17314.5	18978	22818.2	19342.5	20832.5	21739.6	21028.2	21937.1	13952.7	21273	Mitochodria
1663	Q03629	YML079W	6000.56	6248.66	5323.88	5370.72	5497.06	5353.8	6303.9	6760.83	5768.54	5557.89	5888.02	5834.84	3243.93	4374.61	4302.36	4673.45	5962.07	4650.37	4542.18	4857.4	4404.03	4466.98	4808.68	4041.75	4155.07	2971.95	3909.98	Other
1664	Q03771	YDR161W	353.75	441.628	358.382	382.154	362.272	301.695		56.0964	312.226	432.682	369.354	462.137	219.845	336.017	327.75	337.057	409.72		284.634	324.685	350.879	372.034	66.4507	318.009	347.306	235.586	409.445	Other
1665	Q04119	PPN1	398.772	472.756	473.47			365.316	316.416		282.167				281.107	270.765	172.272			300.704	217.22		239.16			214.006			347.413	Other
1666	Q04772	IRC21	1664.35	1709.28	1678.37	1658.34	1930.67	1656.57	2350.22	2562	2510.58	2607.08	3034.57	2837.45	1664.55	2450.04	2289.07	2481.73	2256.41	2373.18	2182.32	2206.71	2458.25	2539.09	2294.78	2323.52	2145.72	1641.54	2345.09	Other
1667	Q05778	PBA1	1578.36	1479.6	1081.64	1439.89		1304.08		1375.75					757.27								2433.06							Other
1668	Q05892	YLR290C	3268.74	2767.41	3742.21	2893.26	2743.64	2710.61	2769.07	3449.7	3436.37	2553.08	3119.28		1281.36	1463.14		1270.09	1405.51			1466.75		1219.25	1164.12		1054.31	721.844		Mitochodria
1669	Q06096	COG4		103.037							20.7447																			Other
1670	Q06511	RRP15	4173.77	4064.61	4114.27	4609.63	5272.76	6265.69	7147.81	6929.54	6317.26	7593.57	9027.87	8971.74	5316.76	8035.77	6546.37	8339.08	9819.69	8422.89	8249.3	8466.66	8257.16	9268.17	8736.87	8973.04	8125.68	6667.1	9622.04	Other
1671	Q07528	ATG20	279.16	334.392	377.555	306.086	349.358								201.506															Other
1672	Q07589	YDL144C	9468.53	7823.98	9930.28	8672.2	7653.7	8155.84	6636.65	6295.57	6924.37	6799.53	7207.34	6195.74	4293.33	5355.03	5901.79	6426.8		5464.74	4960.07	4741.53	5043.05	5240.4	4276.34	4731.91	4216.58	2643.76	4080.14	Other
1673	Q07825	FRA1	2879.86	2483.81	2666.32	2510.55	2259.7	2202.8	2348.62	2310.55	2237.95	2051.38	2148.19	2598.92	1392.2	2374.68	1584.36	1519.44	1711.89	1872.12	1736.57	1822.8	1514.3	1645.16	1867.89	1427	1601.52	1133.97	1896.52	Other
1674	Q08023	FMP25	367.25	377.008			329.201		177.02					615.33				278.981	371.554		338.68	403.367	417.529							Mitochodria
1675	Q08732	HRK1	1490.75			2365.19	1634.16		2215.97	1706.35	1724.41	1756.23	1795.38	2782.58	964.831	1582.03	1441.89	1599.04	1574.55	1482.4	1427.58	1839.23	1592.73	2390.73	1841.17	1706.21	1775.66	1410.13	1808.8	Other
1676	Q08742	RDL2	21666.1	21385.4	22104	20633.5	22335.6	22519.5	28763.2	28127	30935.6	34325.7	39025.2	38718.6	24410.9	38000.7	34115.9	41722.8	43200.2	41317.5	45950.2	54022.9	47463.1	53325	57458.2	52381.2	49010	38496.4	53469.7	Mitochodria
1677	Q08979	KEL3	686.189	659.286			804.115		1326.29	1459.67		1243.79	1439.08		1022.32	1290.79		1454.34	1569.46		1764.29			2119.94	2050.75	2400.89	1597.98	1452.39	2163.27	Other
1678	Q12033	RIM20											708.883																	Stress
1679	Q12178	FCY1	3540.84	3225.38	3570.75	4241.91	5035.97	4731.58	7636.02	8127.76	6793.31	9610.18	9872.37	10791.6	6582.41	11427.2	9747.09	13385.1	12640	12011.8	13651.4	15026.1	13095.1	14129.6	14859.7	13815	13026.8	10795.6	14241.9	Nucleotides
1680	Q12191	BUG1	412.457	183.808	251.701		341.807	122.502	212.996	408.511		159.351	343.015	350.505	189.11	278.782		255.807	88.8132				129.258		114.343		181.519	55.1985		Other
1681	Q12234	RUD3		610.476	643.104		672.709				705.148	676.912		850.071	488.944	730.862		687.523	162.345	712.602	773.421	466.04	186.368	866.283	37.886	480.52	70.0939	104.472	757.209	Other
1682	Q12247	FYV7	1084.77	1070.88		1075.52	1348.15	1100.19	1849.41	1951.66	1478.21	2111.29	2015.34	2370.75	1602.55	2459.74	2579.2	2735.14	2921.98	3038.17	3003.95	3272.2	3349.25	3553.96	3083.49	2693.09	2995.55	2325.05	3427.67	Translation
1683	Q12335	PST2	180695	181941	195043	151753	143812	142950	129021	125892	125342	130750	125793	139103	75750.3	92879.3	94792.3	85694.6	83739.5	81388.8	70486.4	65397.5	66116.1	60046.9	60673.9	57969	50964.9	38487.4	54652.3	Mitochodria
1684	Q12429	DPH6			397.538	427.396					528.663	549.374																		Other
1685	Q12487	MRPL23	5538.11	5692.79	6478.07	6520.3	6889.24	6245.24	11687.6	12074.7	11057.6	14371.4	15616	14960.4	9286.22	15300.3	12441.7	14193.4	17628.3	16346.6	17309.7	20128.4	17201.5	20873.7	21632.8	18426.1	17976.8	14296.6	20014.8	Mitochodria
1686	Q3E772	YGR169C-A	6497.41	7115.69	7242.62	6447.2	6682.33	6779.07	7209.03	7820.48	7358.46	7567.46	8621.46	8366.92	4850.6	6616.65	6462.86	6719.85	6941.43	7145.47	6534.11	6673.58	7282.87	7059.53	6940.53	6635.76	6072.69	5032.37	8098.59	Translation
1687	P02309	HHF1	237495	249891	225555	264911	251930	241281	386713	379626	359477	401710	482878	474184	263255	391778	392393	410016	420279	386137	326478	371711	341702	384439	374171	345274	328934	259948	368346	Other
1688	P02400	RPP2B	104153	107418	111694	112488	116399	125208	159970	168151	156481	184167	232573	210655	121673	185414	186708	190832	208930	204799	203845	224219	201169	243619	237652	230353	226958	183102	275473	Tanslation
1689	P04161	ADE8	8123.5	8651.81	8541.32	9027.98	10171.2	9367.94	12578.1	13553.8	13372.7	14376.5	16869.4	17598.4	10456.8	14708.7	14646.3	14666.6	14623.7	15873.2	16931.7	16296	17540.6	15002.2	14355.8	15098.5	14224.1	10990.8	20214.8	Nucleotides
1690	P05745	RPL36A	15089.5	14791.3	15124.3	15109.7	16390.3	17417.5	19657.4	22464.2	21868.4	22887.9	26883	24549.8	16489.4	24307.8	23985.8	26107.9	25770.7	28739.6	27316.5	29868	26345.7	34173.1	34219.6	32675.2	32556.7	27482.9	45377.9	Tanslation
1691	P06245	TPK2	5399.33	5606.6	5980.8	5574.63	5773.63	5513.79	5332.92	5730.92	5839.51	4042.7	4448.28	5069.77	2417.77	3010.44	2150.96	2184.69	2481.15	2782.98	2009.38	2973.19	1794.32			2360.69	1485.66			Other
1692	P06778-3:P06778-2:P06778	RAD52	902.763	879.771	962.33	1020.93	1315.16	1075.64	1389.16	1588.87	1180.8	1287.01	1724.72	1751.71	934.666	1611.88	1257.01	1104.67	1344.73	1115.32	1162.04	1612.2	1194.17	1330.36	720.117			1371.81	3041.27	Stress
1693	P07172	HIS5	13875.4	14467.7	14200.6	14830.8	14414.2	15355	19297.6	19746.6	18894	18165.4	18719.9	18897.1	9395.02	12184.6	12353.1	9869.95	10295.1	8732.17	10088.1	11648	10981.6	11960.4	11809.9	12238.6	11935.9	9345.32	15172.5	AminoAcid
1694	P09734	TUB3	7554.25	6347.71	7080.3	5073.26	7933.4		7967.08	10944.9	7559.74	10001.2	12346.1		6628.74	9670.44	8588.9	8362.28	11607.6	7413.34	9738.39	10807.7	8165.43		11397.8	8957.37	9221.85	8327.49		Other
1695	P13393	SPT15						1231.63					2457.71		1594.71	2113.93	2242.55	2137.97	2326.47	2411.72		3337.45	2506.13		2352.66	2292.45	2600.33		2580.09	Transcription
1696	P14120	RPL30	113903	116347	112830	124251	112300	121685	167942	171351	162030	179300	198399	211109	123847	189931	188522	204625	218911	215569	214823	229343	209609	256947	244703	250492	225388	196099	300516	Tanslation
1697	P14908	MTF1	843.431	833.414	815.041	730.443	812.069	761.846	798.761	908.66	648.135	925.54	1212.78	1114.4	681.842	1069.08	995.044	1118.51	1114.27	1091.25	1256.68		1258.75	1403.25	1286.29	1323.74	1292.3	917.312	1198.52	Transcription
1698	P16370	RPB3	2691.68	2562.07	2648.18	2496.31	2564.36	3186.59	3509.36	3114.72	3027.25	3481.63	3682.9	3743.98	2365.59	2994.77	3278.92	3113.93	2974.82	3806.5	3116.46	3111.79	3464.99	3072.55	3164.96	3034.23	2746.17	2352.73	3418.17	Transcription
1699	P16661	ALG1				473.757	416.941	314.364	603.271	519.752				443.651				412.427					323.601	516.277	401.703	280.125			420.203	ER
1700	P17106	CBF1	989.208	1089.34	1046.68	1228.53	1160.82	1075.36	1575.51	1767.36	1701.13	1862.39	2107.09	1834.51	1203.23	1866.54	1667.99	1677.39	1784.46	1646.2	1492.61	1569.94	1574.15	1413.79	1534.15	1589.11	1421.08	1066.65	1659.41	Transcription
1701	P17695	GRX2	56077.7	58159.9	62283.2	53807.2	52624	55570.8	46197.4	44308.2	44543.5	41261	42030.5	44839.3	21347.3	27226.6	25711.4	22841.8	22947.2	23181.8	20825.1	22410	21563.6	21395.3	18645	16670.6	14983.5	11416.9	15582.9	Stress
1702	P18562	FUR1	9183.09	9534.2	7608.03	10192.1	8569.33	8738.63	8781.93	9881.43	9027.21	11170.5	12048.8	12755.9	7261.64	12001.9	12434	11601	14765.1	12078.3	13756.8	15333.5	13175.1	17155.3	16666.8	15388.2	15270.7	11795.4	18450.3	Nucleotides
1703	P18851	STE4	3282.08	3274.28	2748.51		2618	2804.16	2686.86	3348.14	2523.17	3129.38	3570.33	3335.67	2139.95	2783.2		3593.64	3597.11	3595.52	2696.64	3568.22		3529.64		3622.66	2964.79	2559.7	4082.7	Other
1704	P19880	YAP1	521.633	698.953	1287.41	582.175		1228.06	904.867	863.003	613.038			1248.85		778.503		662.302	758.361	1633.71	811.358	742.035		926.009	966.342		907.695	451.738	478.873	Transcription
1705	P20081	FPR1	195954	202106	196226	184035	193835	195660	209651	224738	226955	228428	248447	262138	158365	216361	200065	218698	234037	223684	219283	204033	226798	179257	184262	163952	141834	104937	154296	Other
1706	P21375	OSM1		413.096		349.76		496.735	251.994	502.88	715.79	577.441		980.491	203.349					445.135								218.964	423.755	ER
1707	P22211	NPR1	1411.68		1528.55		1858.49		2604.52	2695.67	2468.58	2546.73	3318.4	3370.51	1953.93	2906.79	9567.02	2934.34	3014.04	3027.41	2951.8	2944.23	2962.33	2834.24	2897.59	2913.11		2065.57	2906.01	Other
1708	P22434	PDE1	1544.06	1433.99	1475.28	1698.95	1267.73	1261.58	1135.51	1340.75	541.175	1571.43	1043.94	1246.64		882.003		742.294	768.343	829.269				949.385	693.815	903.842	643.545	436.388	1353.07	Nucleotides
1709	P23291	YCK1	270.839	244.931	272.107	285.213	266.172	373.715	390.846	416	375.281	357.179	459.243	449.966	267.862	381.989		343.196	410.694	387.208	358.613	376.364	338.98	390.11	405.57	483.286	312.602	321.701	421.495	ER
1710	P23292	YCK2														1783.8			1683.75	2046.8	227.014			1763.84						Other
1711	P23776	EXG1	6786.93	6977.9	7109.9	5905.75	5854.25	6531.26	6240.1	5427.59	5829.28	5387.04	5077.6	6556.55	2800.11	3777		4155.86	3682.09	4044.99	3459.68	3696.92	3093.02	4597.31	4841.64	4930.82	5061.75	4227.17	6412.28	Other
1712	P25369	LSB5	4428.93	4025.47	3935.05	4625.6	4271.21	3546.41	5916.15	6023.51	5359.31	5865.18	6499.12	6581.56	3671.48	5677.49	5979.99	5473.09	5957.23	4909.39	5154.17	6588.78	4736.46	5989.52	5603.12	5487.17	4714.98	3829.06	6530.77	Other
1713	P28007	GAR1	28136.3	27930.9	28105.6	27151.7	28471.9	27666	33937	33999.9	32843.2	35626	40016.1	40364.2	24602.7	36128.5	33051.5	34790.2	38238.3	36558.6	38204	39605.6	37580.5	41547	41997.5	38255.1	37959.7	31726.4	45040.1	Tanslation
1714	P28239	PPA2	1764.88			2239.51		2048.3	2287.25		2485.26	2887.11			2099.56	3358.2	2685.3		3607.35	3269.04	3186.1	3814.61	3349.84	3720.1	3305.88	3594.09	2920.47	2411.19	3675.76	Mitochodria
1715	P31115	DEG1	96.671	75.5989			74.2957								132.152			269.358	196.058				164.945		57.5756	164.615	102.215	50.9944	192.746	Translation
1716	P31374	PSK1		140.941																		49.3747					18.6194			Other
1717	P32367	TFC1				688.68				566.715											421.582									Transcription
1718	P32495	NHP2	33085	33755.9	35703.3	32084	30242.6	33096	36953.8	39055	38008.7	40748.3	41517.6	46377.3	26568.8	39299.2	36837.1	40252.9	41926	41814.4	39281.5	39244.5	42488.1	43915.5	42475.5	41856.5	38779.6	32474	48873.1	Other
1719	P32598	GLC7	13806.2	14734.6	14262	13857.5	14269.8	14208.2	15103.1	14996.6	14727.6	15971.5	16728.9	16307.3	9522.2	13316.3	11343.3	12044	12743.2	12661.7	12185	13388.2	12580.8	13208.5	13165.2	13412	11598.4	9389.18	11764.3	Stress
1720	P32610	VMA8	7040.28	8155.91	8127.16	8230.41	8171.29	10994.3	10583.5	10433.5	10290.7	11575.6	12758.9	12979.6	8073.52	11890.7	11123.4	11302.7	11958.9	11563.2	11117.6	12214.7	11628.6	12676	12152.5	12141.5	12460.6	9713.59	14702.1	Energy
1721	P32611	RML2	3338.05	3725.6	3242.88	3599.17	3975.3	3892.93	6862.1	7541.59	6552.42	7237.03	8426.43	8346.97	5335.59	7955.97	7589.91	8937.14	9432.08	8495.48	8994.83	10497.5	9798.97	11664.2	10577.5	10101.4	10317.3	7754.74	12118.7	Mitochodria
1722	P32644	ECM32	111.168		280.573	95.8874		82.2348			89.4624			150.782			129.171	136.949	177.184	127.893		185.509	121.408	196.607		141.313			148.882	Translation
1723	P32831-2:P32831	NGR1		501.399		616.471	369.49			382.413	537.727	572.801	430.362			589.308			428.787											Mitochodria
1724	P32895	PRS1	14381.2	14504.5	14247.1	14596	15538.6	15309.6	20348.4	21589	20573.7	23130.8	24702.2	26310.2	13266.8	25086.6	22370.2	20910.8	22511.8	25515.3	20144.5	19342.9	24727.3	19045.5	19910.9	19166.1	17730	15811.7	25023	AminoAcid
1725	P33334	PRP8	8.6908																											Other
1726	P33441	MFT1	214.958	301.898		239.853			315.175						22.5618	44.5075		349.004		276.629									332.417	Transcription
1727	P33754	SEC66	4661.54	3488.35	5913.71	2036.06	3755.51	4938.99		6115.03	4975.46	5487.45	6318.37	6590.88	3700.99	4805.26	5623.54	4996.92	5352.28	5036.3	5245.01	4635.34	5124.95	4582.13	5299.93	5501.47	4855.59	4145.75	5113.36	ER
1728	P34220	YBL055C	943.046	843.69	1039.88	930.918	903.614	786.332	705.207	786.536	961.596	1157.31	1221.58	1223.57	652.062	941.513	1125.75	902.16	1031.22	1003.04	1014	932.878	1009.83	292.098	832.686		828.078	637.253	908.356	Other
1729	P34253	KTI12	2204.26	2190.66	2714.24	2035.01	1702.12		2580.38	2870.45	2259.48	3504.39	2403.55	3422.08	2124.23	2564.36		2458.32		2733.42	3074.38	2416.97	2658.13	2200.93	2484.15	2988.96	2141.59	1510.49	3298.2	Transcription
1730	P34756	FAB1	73.1425	68.1394	45.3054	64.8247				68.4015	27.7433	62.8027	69.7868		38.7466	52.6164	41.3402	41.6418	52.3815		49.4612	55.6187								Stress
1731	P34760	TSA1	158450	174677	172802	177121	185525	176753	205125	206407	205050	201650	199084	228209	125260	177859	178022	168049	172488	174533	176172	194052	186771	182815	191494	179850	157970	117131	175651	Stress
1732	P35178	RRP1	918.114	685.626	995.225	741.013	765.273	766.472	902.071	808.502	915.186	877.836			728.741	684.668		957.157	791.532	823.064	878.435	681.103	812.902		683.33		860.615	608.482		Other
1733	P35180	TOM20	2221.07	2031.2	2003.54	2691.62	2357.1	2576.26	4235.93	3958.42	3659.6	4454.33	3324.69	5993.29	3470.64	4179.77	4872.4	5632.48	4981.25	6148.37	6975.06	6375.04	6599.87	7420.24	6360.73	7056.11	5891.22	4172.66	6870.06	Mitochodria
1734	P36048	SNU114	301.325	229.514	197.881			287.901	277.903	318.188	328.712	253.721			150.432	265.142		266.801			198.468	221.951	252.363		144.525	237.609		190.162		Other
1735	P36069	PMU1	1886.74	613.989	756.864		782.945		1583.87	1400.4	1891.24	1377.35	1389.33	1696.92	1224.85	1505.82			1521.48	1418.37	826.715	1513.26		2551.92	1820.08	1803	1803.9	1455.72	2580.06	Other
1736	P36094	SPC42	792.559	885.985	1519.4				1413.83	1537.65		1269.27	1399.59		2158.73	1154.37			1159.07	1155.73	1236.2		1368.76	2386.74	1107.15		2384.79	765.351	3206.63	Other
1737	P36526	MRPL27	3842.7	3801.74	4000.66	4470.22	4572.44	4187.66	7481.14	8004.68	7641.83	9030.86	9973.9	9698.02	6114.89	9729.85	8390.83	10614.1	11324.1	11211.7	11637	14037.1	13869.6	14441.7	14190.4	13690.1	12405.6	10684.9	14645.4	Mitochodria
1738	P37366	CCL1				554.412								734.041					699.788	701.035		902.806	815.073			832.051				Transcription
1739	P38064	MRPL16	1896.18	1999.11	1952.35	2136.43	2807.28	2464.88	3874.25	4545.4	3577.01	4653.61	5013.07	5291.19	3052.65	4407.55	4519.89	5118.74	5003.1	5828.03	5457.29	6622.46	5835.3	6124.3	6224.74	5871.36	4882.41	4050.8	5813.27	Mitochodria
1740	P38127	RIM2	939.263						1553.82		954.466	1362.39											709.832							Mitochodria
1741	P38130	KTR3	2066.13	2499.03	2217.63	2129.45	2114.86	2302.57	2049.17	2028.89	2221.82	2341.06	3173.49	3196.86	1705.88	1065.6	2077.69	1947.88	2262.31	2393.55	2275.93	383.669	2191.77	2034.18	1997.74	1830.57	1236.83	1465.22	2123.76	Other
1742	P38138	ROT2		582.139		431.156	637.89	521.307	669.863	980.752	648.439	734.189	771.296	915.058		428.455		533.689	545.518			371.134	380.792	480.445	531.786		735.923	396.013	423.772	ER
1743	P38175	MRP21	4517.57	4590.84	4594.23	4803.64	5528.83	5580.36	9213.82	8622.56	8224.3	10178.2	11672.3	11368.2	7486.51	11452.6	11519.3	13954.9	14699.2	14090.4	17008.4	21110.4	16251.6	20358.5	21235.4	17952.6	17715.9	13778.8	16370.5	Mitochodria
1744	P38187	UBP13			77.6512	65.0445	71.5539		73.8304		111.561					66.0251	48.9899	79.6775												Other
1745	P38202	YBL028C	951.991	977.915		1066.71	1303.8		2126.24	2292.07		2600.43	2918.95	2892.45	1972.34	2939.86		2749.88	2970.79	2792.76	3416.8	3816.99	3241.62	3783.86	4461.77	4035.24	4103.62	3519.84	5116.77	Translation
1746	P38237	UBP14	1886.94	2286.34	2281.99	1049.12	1772.43	2127.7	2241.7	1435.72		2262.83	2601.18		1405.35	1869.19			2041.47	2109.37		1559.08			1636.95		2319.08	977.216		Other
1747	P38325	OM14	61046.2	59468.2	47696	67323.8	57915.3	42248	63513.5	40747.8	41214.5	60933.3	37859.9	41930.6	34973.2	26513.1	27941.9	20456.6	18891.7	23474.6	26647.1	17291.9	21799.3	15514.6	16001.5	15957.5	11478.5	8016.79	13237.9	Mitochodria
1748	P38841	YHR138C	9784.96	8290.7	10936.2	10081.8	9493.74	10204.4	10103.7	10316.1	8801.26	8083.54	9292.13		2920.48	3644.17				3646.12	1532.77	2665.51	2868.38			2309.53				Other
1749	P38889	SKN7	583.733	684.965	534.916	650.995	680.164	648.428	965.875	943.652	886.772	865.552	1048.44	1064.79	592.234	855.506	821.954	744.008	832.736	804.801	734.335	812.951	808.608		823.166	960.747	895.731	676.915	1040.61	Transcription
1750	P38912	TIF11	31103.2	32966.8	33127.3	29860.8	34439	34087.3	39906.2	43695.3	40638.7	46503.3	50498.4	49242.5	30234.8	46190.7	40995.4	46130	51444.8	47685.2	45727.4	53119.4	51494.3	53267.8	52642.7	47359.5	46656.5	38800	56659	Tanslation
1751	P38922	HRB1	3905.91	4375.33	4613.61	4676.88	4847.47	6803.17	5158.08	6655.28	6430.07	6706.29	7705.65	7717.09	4577.42	6606.94	6232.5	5928.78	6697.71	6752.01	5218.93	5430.96	7135.22	6055.63	5845.83	5347.07	5072.07	3158.84	5827.56	Other
1752	P39011	BEM4																			94.2995									Other
1753	P39742	SEC72	856.839	803.186	779.645	913.202	870.181	1031.89	1112.61	1410.54		1495.51		2327.39	886.69			1271.29	962.496	1332.44	1232.51	1047.49	1204.47			1131.19			1773.94	ER
1754	P39938	RPS26A	178173	188362	180287	187893	199812	196492	258779	270477	251894	287287	320314	314128	189886	281647	276110	283746	297419	311868	313738	345754	323696	373555	365444	363916	346527	284321	435985	Tanslation
1755	P39939	RPS26B	23856	24595.2	26835.7	26183.5	26695.3	28756.4	36406.4	38592.6	35675.7	41069.5	46769.8	47848.9	28372.6	42801.4	39152.9	48823	47512.5	51781.8	52582.2	59474.1	53893	71961.3	70839.5	70925.9	67497.7	57180.8	88520.5	Tanslation
1756	P39962	YCK3		355.135	560.656	316.676				461.231	632.718		840.418	604.135	284.414	553.603		573.421	485.424	1026.47		430.915			449.521	458.004	377.367		1110.86	Other
1757	P40035	PIC2	698.954	638.532	768.144	796.639	764.387		1240.28		715.111										381.685	818.832								Mitochodria
1758	P40066	GLE2	3430.91	3341.44	3436.73	2516.52	2946.47		3519.54	3359.89		3722.08	2976.56		1944.89	2945.38		2595.53	2154.57	2868.98	2294.75	2122.84		2540.04				1737.68		Other
1759	P40210	SIP5	1326.15	1712.23	1115.13	1547.44	1674.3		1898.86	2268.91	1606.08	1747.05	2559.18	1682.41	924.898	1299.86		1440.69	1324.29	946.943	1233.88	1126.08	1066.77					607.292		Stress
1760	P40328	YTA6			90.4046										40.2903								91.1549							Other
1761	P40335	PEP8	1269		1139.88	1422.2	1439.31		1399.76	1551.15	1406.09	1262.15	1047.18	1797.29	776.259			1009.72	1114.85	977.368	1061.29	1099.56		1069.93		1022.66		694.288		Stress
1762	P40459	PAN6	2237.89	2367.06	2937.66	2500.79	2698.8	2047.14	3412.69	3247.52	3275.55	3619.13	6010.61	3552.27	2327.5	3937.52	2491.99	2783.79		3267.24	2910.76	2199.72	2365.75	3017.86	1977.49	2611.01	3012.14	3515.71		Other
1763	P40525	RPL34B	37270.7	36806.7	38082.2	47743.7	53034.5	39766.3	65697	64874.1	48564.5	66874.6	74075.3	78775.8	44952.6	64925.2	52136.9	65385.3	66906.5	63093.6	66068.1	70353	65932.5	76663.9	75858.6	73275	68647.1	57958.2	84728.5	Tanslation
1764	P40529	AGE2	1689.86		1678.27		1894.3	1710.56	1992.23	2138.31	2413.86	2427.44	2768.82	2612.12	1495.35	1982.82			1968.16		2306.66	2000.48	2591.71	2237.9	2189.74	2120.25	1950.75	1449.72	2656.59	Other
1765	P41056	RPL33B																							465544					Tanslation
1766	P41816	OYE3	9996.72	8979.17	10254.8	11372.3	9076.54	10244.7	6045.51	6811.27	5885.37	5198.97			1922.19	1324.11	954.097									2806.55	2723.51			Stress
1767	P43558	OTU1	3893.41	3743.51	2811.72	3496.83	2951.4	3505.04	2840.93		2591.74			2939.9	991.914	2079.7	1980.07	1970.25		1894.26	1597.25	1033.15	1752.28	1149.83		1739.51	1684.84	1294.59	1833.58	Chaperon
1768	P43561	FET5	6155.34				5442.81	6603.91				5678.61		7477.31	6588.58					8008.63	3724.36	4173.7	5290.91	4686.87					6367.54	ER
1769	P43577	GNA1		1930.7		2214.99	2507.34			4647.79			3908.01	3992.36								2707.06		2407.15			1858.32			Other
1770	P46669	RPA43	6744.07	5660.14	6491.83	7971.17	8469.72	8071.81	10423.9	12046.3	9089.98	12359.9	12653.1	12710.6	7979.83	11705.5	9247.27	10877	11406.2	11416.9	11448.5	10429.4	10974.5	12985.9	14381.3	10597.2	12795.4	7778.29	13988.9	Transcription
1771	P46943	GUF1																						376.008	351.347		325.185			Mitochodria
1772	P46949	FYV8	162.946	165.894	187.755		177.705	140.997	200.495	133.62				171.942		118.989			79.9399	156.103	170.013		110.907	168.272		145.372	136.866			Other
1773	P47076	RPC17			790.959	918.9		1366.46	1200.22		1230.53	1525.79	1972.55	1867.42			1469.23		1684.31		1482.57		1604.04	1741.71				1304.28		Transcription
1774	P47084	MRX12						335.154			797.338																			Mitochodria
1775	P48412	UPF3	252.74	240.949	254.607	252.816	268.482		267.097		282.361	254.157	322.496		183.14			260.192	273.255			186.584		273.987	246.777		230.177	217.745	282.482	Other
1776	P50278	SOL1	5554.68	6270.16	7248	6165.74	5149.3	5014.74	4390.06	4219.14	3177.21	3632.8	3394.96	2888.53	2112.44	2569.84		1972.91	1712.71	1543.51	2236.81	3072.85	1743.62	2280.29	2854.32	1954.89	2359.6	1300.8		Energy
1777	P52553	YKE2	6661.19	6237.23	7310.66	6011.36	5679.82	6547.44	6734.18	8706.59	7718.36	8654.94	10255.6	8773.1	5131.29	7926.42	6879.87	7130.15	8517.96	7133.13	7329.48	8112.62	7398.55	8177.64	7469.94	6603.24	7264.07	5164.99	8200.34	Other
1778	P53044	UFD1	4261.58	4055.01	4084.42	4339.54	4186.2	3912.13	4385.24	4729.22	4548.48	4687.94	4924.19	5089.13	2895.87	3840.95	3873.99	3560.03	4097.56	3898.12	3382.02	3194.17	3075.85	3524.9	3577.69	3258.55	3319.68		3754.76	Other
1779	P53045	ERG25	143.015	121.535	138.808	461.619	427.796	455.664	1396.37	1118.09	1130.29	1042.81	1150.53	1359.9	646.326	499.446	530.942	290.587	243.26	219.63	156.779	170.903	151.834	227.491	187.816	195.165	187.698		230.238	lipid metabolism
1780	P53067	KAP114				45.241												50.7621												Stress
1781	P53076	VID30		144.978																										Other
1782	P53183	YGL039W	478.17			1022.26	519.265		706.57			876.775		992.683	719.186	951.797	1274.71	1213.88	1224.1		1254.33	1156.51		1101.4	1223.05	1190.6	976.394	879.072		Other
1783	P53184	PNC1	119226	130836	139057	125644	124855	126371	97810.3	105257	106078	85925.6	85307	85956.3	33673.9	39796.5	38070.7	23888.7	22778.6	21039.2	18385.2	22482.9	19297.4	23808.6	23176.3	22999.5	19245.2	15758.4	22905	Other
1784	P53201	SWC4			137.075			119.942	323.044	207.096	151.034						183.94			198.941			234.811			209.312			284.599	Other
1785	P53266	SHY1	1874.27	1607.57	1611.42	1880.68	1572.33	1757.82	1972.38	2398.03	1921.02	2127.35	2335.66	2493.22	1413.73	1900.51	1930.87	1729.66		2062.86	1947.87	973.643	2119.66	2244.1	2084.07	2062.21	1659.04	1240.7	1770.48	Mitochodria
1786	P53334	SCW4	9609.9	7922.14	7869.36	8894.06	9496.56	9952.52	12427.7	13654.9	13035.4	14433	14537.3	13932.4	8435.27	13862	10893.1	12530.8	15411.9	12865.7	11824.8	11282.3	11834.7	12191.5	12040.4	11362.6	10528.5	8464.93	12755.9	Other
1787	P53721	RCF2	6337.76	5713.11	7229.78	7906.22	6861.32	7916.72	9497.9	10179.1	10094.2	9986.82	10028.5	12694.4	7796.02	10454.8	9537.97	10371.9	10378.4	10297.4	9317.52	9627.8	13026	10088.4	7836.42	10441	7704.08	5849.18	10434.3	Energy
1788	P53736	YNR040W				2210.88	2521.58		3605.81	3781.21	4270.24	3499.79	5269.93		3371.95	5059.63	5294.59		5439.13	4579.21	5947.9	7356.96	5504.97	6930.89	7543.09	6357.79	6739.64	5066.41		Mitochodria
1789	P53834	HCH1	28071.8	32350.2	13733.6	26669.8	23046.6	18076.6	18163.1	20954.4	20066.9	21177.8	22885.6	23655.5	13669.4	20719.1	11116	19380.4	20737.7	21415.4	22676.6	22962.6	22962.4	18179.7	22471.9	21049	19548.5	15582.4	24457.8	Chaperon
1790	P53899	CUZ1			788.778					1083.99								1604.21		1109.83	1427.81		1211.86				2263.39		1800.71	Stress
1791	P53929	YNL108C	1759.93	1512.14		1393.89	1777.29		2247.94	1235.62	2713.64	2402.1	1174.55	2518.54	1730.58	2105.24		2199.55	2167.11		1677.92	2054.88	1882.71	2482.43	2564.85	2886.91	2992.93	2574.75	4078.38	Other
1792	P53935	NST1							1876.39				225.914		1124.42	600.046			334.818						590.672			459.208		Stress
1793	P53954	ALG11			420.203	339.927					344.024																			ER
1794	P53960	YNL040W	1459.85	1628.58		1932.88	2088.65	2151.56	2098.2	2417.96	2158.49		2486.33	2415.06	1385.99	2497.68	1869.06	1802.61	1729.26	1690.48		2097.6	1621.46		1692.11	2457.31		1411.25	1697.07	Other
1795	P54000	SUB1	1290.45	1936.67	1261.89	1484.21	1342.65		2114.7	2050.03	1966.57	2636.49	2768.23	2596.25	1461.56	2284.61				2330.23	2479.26	2038.06	2141.55	2664.36	2338.71		1918.73	1473.84	2357.56	Transcription
1796	P87108	TIM10	10617.5	10400	11065.4	11410.1	11251.7	11648.7	18454.1	18259.8	17375.7	21582.8	23002.7	22972.3	14318.4	22648.3	20607	23693.7	25031.6	25497.1	29413.7	33115.8	31419.7	33592.9	33741.9	31650	29615	22933.9	34696.8	Other
1797	P87262	RPL34A	118642	114019	122279	132948	140182	134194	192520	198203	168018	189897	226731	231900	129860	199358	188404	206147	218684	214974	219951	237377	223212	253464	251226	238711	232725	189230	286372	Tanslation
1798	Q00772	SLT2	4509.96	5610.11	3953.27	4041.8	4259.68	3624.22	4295.94	4265.05	4119.92	3782.92	3986.43	4518.18	1802.59	2834.66	1794.26	2335.83	2155.49	2320.38	2217.83	2305.44	2281.63	2363.48	2013.4		2015.16	1557.14	2138.12	Other
1799	Q01519	COX12	53787.1	51542.2	53268.4	56942.3	57264.8	59933	64747.3	66560.9	63764.8	70460.2	73703.8	78050.2	49155.7	72678.1	68843.6	77122.6	84979.3	80173.1	83491.8	97012.2	85742	90364.9	95234.5	86667.5	71033.3	57234.1	77269.1	Mitochodria
1800	Q01976-2:Q01976	YSA1	13848.4	12535.1	11849.9	16637.9	14139.2	16610.2	15796.3	10339.2	17076.9	12686.7	10813.6	21453.9	7448.46	13331.3	10456.6	7083.09	13102.2	9042.2	11257.4	13212.6	12726.1	7237.38	4253.47	10581	6313.24	3608.81	20092.3	Nucleotides
1801	Q02608	MRPS16	910.354	934.445	1124.68	1145.83	1256.74	1270.59	1995.65	1878.49	2014.9	2182.75	2653.12	2769.95	1526.76	2719.87	2734.87	2441.01	3075.15	2746.59	3052.68	3787.65	2948.84	3581.77	3379.96	3335.32	3172.19	2268.3	3895.3	Mitochodria
1802	Q02793	SKI8	3847.67	3904.07	3547.37	3720.02	3802.76	3412.41	3709.28	4811.59	4258.37	4066.55	3362.63	4733.77	2210.53	3893.1	4049.96	3309.74	3407.72	4597.59	2823.06	3651.92	3604.04	3950.57	4431.33	4359.19	3083.68	1792.63	5011.63	Other
1803	Q02821	SRP1	22405.4	21318.9	23100	25577.9	25532.6	25488.2	32362.3	33816.1	32214.4	34542.1	37528.7	41036.7	23027.4	32335.7	31945.5	31895.7	32657.8	31144.6	30011.7	28086.7	30200.5	28420.5	28981.5	27282.1	25345	20843.4	30068.7	Other
1804	Q03124	RSC9	488.674	501.135	600.593	660.648	610.647	498.538	806.285	813.859	774.854	668.558			492.89	615.375				706.96	701.417	643.056			800.135	658.864				Transcription
1805	Q03264	NGL2	225.883	243.078		342.506				580.757	355.79	843.572	899.624	1012	635.27	1091.2		1011.37	1235.72	1211.29	1127.58	1218.61	1119.87	1670.22	1363.74	1493.91	1348.51	1053.3	1769.56	Translation
1806	Q03305	RMT2	1267.19	887.789	1113.06	822.899	1338.75	1536.01	1116.22	1251.83	1031.8	1141.03	1205.12	1434.52	1074.63	1300.7			1340.87	1546.04	1254.15	1115.06	1263.12	1678.24	1609.12		1335.19	973.672	1628.05	Other
1807	Q03330	GCN5	515.699	403.97		622.668	479.314		367.456		651.405	680.07	791.912	677.913	424.119	642.869	705.488	691.335	617.249	642.524	762.463	757.214	748.396	600.406	817.817	519.488	629.039	587.482	581.86	Transcription
1808	Q03677	ADI1	9890.76	8766.83	9361.95	9075.52	10494	10449.6	12169.4	13470.8	12430.9	14617.1	16286.3	15640.6	10095.8	15083.2	14460.4	16259.4	16455.5	16499.5	15948.9	13666.1	16364.4	12197.7	13348.2	10376.4	10122.9	8211.61	9890.73	Other
1809	Q03707	SRC1		480.53					533.171		573.708	452.586	344.064	320.612	341.381	346.346							438.761	245.556	241.843	285.537				Transcription
1810	Q03735	NAB6				600.16		751.687					1077.1			568.397							1743.23			1790.33	1289.99			Other
1811	Q03768	GIR2	9827.62	10409.6	10844.1	9596.64	9293.58	8083.67	10847.2	10948.6	10274.1	12162.8	12770.5	12684.4	8320.41	11910.9		10845.6	10748	11262.4	11393.6	11047.9	12136.7	11142.3	11158.5	10933.1	10000.6	8158.16	11506.9	Other
1812	Q03799	MRPS8		2619.75	2541.35	2967.22	3145.72	3046.2	5116.19	5322.77	4996.61	5818.61	5993.81	6523.88	3900.13	5640.58	5215.17	6405.69	6763.91	6737.22	6662.71	7600.54	7482.26	6377.79	7675.25	7544.09	6718.06	4875.88	7675.13	Mitochodria
1813	Q03973	HMO1	8572.06	8962.21	9685.83	9518	9323.66	9119.16	10346.4	11466.4	10174.1	11571.9	13956.1	12927.1	7878.7	12421.5	10991.4	11585.4	13242.8	11338.5	12066.8	14328.7	11503.2	17095	16704.6	15099.1	14955.9	12111.7	18064.1	Transcription
1814	Q04228	UBX2	718.378	699.085	423.353		621.073			795.027	477.56					616.785			798.591			422.654								ER
1815	Q04344	HNT1	108515	112200	113306	94797.1	93409.8	89890.4	89170.4	93340.6	87635.4	99911.6	109345	101253	66091.3	98082	95384.2	98149.9	99667.7	100952	84430.4	81675.8	88859.7	81335.1	83716	79300.2	71653.8	60365.8	83785.5	Other
1816	Q04493	GIM5	2077.94	2196.3	2127.83	2187.01	2236.58	2360.32	2812.26	3073.08	2853.56	2833.97	3729.78	3938.63	2313.97	2693.67	3141.79	3343.93	3617.08	2700.83	3395.55	3453.29	3076.76	3244.47	2975.56	3126.4	3027.76	2347.31	3430.72	Other
1817	Q04951	SCW10	2354.73	1879.78	2212.13	1327.6		1408.68	1411.52		1390.74		1616.31	1695.98		1566.29	1264.93	1359.37	1744.84	1415.15	1457.55		1489.15	1434.09	1311.01	1343.04	1394.77		1497.07	ER
1818	Q05580	HEL2																				821.356								Translation
1819	Q05788	PNP1	6238.39	6233.4	7147.3	4944.76	6710.32	6019.77	6336.93	5568.36	6149.12	6615.42	5629.22	8382.44	4805.8	6919.29	5589.02	6190.43	7535.24	5663.09	6796.5	7117.84	5697.42	7025	5785.59	6618.4	5435	4279.78	6963.66	Nucleotides
1820	Q05979	BNA5	6329.16	5061.23	6714.29	5106.45	4817.37	5597.89	5084.31	4881.74	4353.65	4973.29	5537.69	5543.16	3187.24	4365.11	3344.94	3934.54	4037.67	2482.65	3601.26	4511.83	3558.04		3636.74	4118.58	3144.64			Other
1821	Q06178	NMA1	4387.17	4394.13	4575.25	3621.72	3772.06	4038.41	3856.82	4442.79	3961.42	4358.79	5071.39	4390.45	2396.77	3995.24	3473.57	3930.76	4215.3	4080.57		3765	3731.17	3936.29	3786.83	4026.97	3782.49	2749.36	3211.53	Other
1822	Q06263	VTA1	3648.1	3814.54	4247.39	2593.27	2635.94	2985.2	2154.04	1844.47	2237.19	2800.12	1926.79	2806.66	1649.8	1906.3		1702.19	1490.95	1934.11	1890.6	1381.6	2060.29	1927.65	1722.17	1558.41	1459.46	1117.94	1983.37	Other
1823	Q06629	HDA2			199.426													445.365		307.109			358.012						340.763	Transcription
1824	Q06677	SWA2	1670.73		1456.22	1369.93	1078.02		1196.58	1767.5		1320.89	1318.57	1259.49	1020.09	1119.88		1000.9	1203.94		842.542	968.017					789.467			ER
1825	Q06696	VPS36			122.86		97.8048		120.521					69.9328	35.0271												52.837			Other
1826	Q07349	MRX9			383.56			455.113					81.3306																	Mitochodria
1827	Q07716	AIM6	3209.28	2989.68	3689.86	2316.78	3794.04	2686.22	3277.37	2613.87	3104.83	3470.57	881.279	3783.78	2048.02	1922.19	2459.38	1934.89	2339.59	2174.84	2690.73	1502.22	2018.59	2265.15	1310.88	1957.57	1308.27	570.914	1558.75	Other
1828	Q07834	YLL032C																				289.462			297.467					Other
[truncated: 993 more rows]
