# Supplementary material for: Proteome allocations change linearly with specific growth rate of Saccharomyces cerevisiae under glucose-limitation
Source: Research Square preprint supplement (doi:10.21203/rs.3.rs-464207/v1), 2021-05-18
Supplement: Supplementary file 5 [file 2-FluxTranscriptomeAndProteomeCorrelationData.xlsx]

## Sheet: Yeast_7_6
Abbreviation	Description	Reaction	GPR	Lower bound	Upper bound	Objective	Subsystem	References	KEGG ID
r_0001	(R)-lactate:ferricytochrome-c 2-oxidoreductase	(R)-lactate [cytoplasm] + 2 ferricytochrome c [mitochondrion] -> 2 ferrocytochrome c [mitochondrion] + pyruvate [cytoplasm]	(( YDL174C and YEL039C ) or ( YDL174C and YJR048W ) or ( YEL039C and YEL071W ) or ( YEL071W and YJR048W ))	0	Inf	0			R00197	[['YDL174C', 'YEL039C'], ['YDL174C', 'YJR048W'], ['YEL039C', 'YEL071W'], ['YEL071W', 'YJR048W']]
r_0002	(R)-lactate:ferricytochrome-c 2-oxidoreductase	(R)-lactate [mitochondrion] + 2 ferricytochrome c [mitochondrion] -> 2 ferrocytochrome c [mitochondrion] + pyruvate [mitochondrion]	(( YDL178W and YEL039C ) or ( YDL178W and YJR048W ))	0	Inf	0			R00197	[['YDL178W', 'YEL039C'], ['YDL178W', 'YJR048W']]
r_0003	(R,R)-butanediol dehydrogenase	(R,R)-2,3-butanediol [cytoplasm] + NAD [cytoplasm] <=> (R)-acetoin [cytoplasm] + H+ [cytoplasm] + NADH [cytoplasm]	YAL060W	-Inf	Inf	0		10938079	R02946	YAL060W
r_0004	(S)-lactate:ferricytochrome-c 2-oxidoreductase	(S)-lactate [cytoplasm] + 2 ferricytochrome c [mitochondrion] -> 2 ferrocytochrome c [mitochondrion] + pyruvate [cytoplasm]	(( YEL039C and YML054C ) or ( YJR048W and YML054C ))	0	Inf	0			R00196	[['YEL039C', 'YML054C'], ['YJR048W', 'YML054C']]
r_0005	1,3-beta-glucan synthase	UDP-D-glucose [cytoplasm] -> (1->3)-beta-D-glucan [cell envelope] + H+ [cytoplasm] + UDP [cytoplasm]	( YGR032W or YLR342W )	0	Inf	0		7649185	R03118	[['YGR032W', 'YLR342W']]
r_0006	1,6-beta-glucan synthase	UDP-D-glucose [cytoplasm] -> (1->6)-beta-D-glucan [cell envelope] + H+ [cytoplasm] + UDP [cytoplasm]	( YGR143W or YPR159W )	0	Inf	0		8321211		[['YGR143W', 'YPR159W']]
r_0007	1-(5-phosphoribosyl)-5-[(5-phosphoribosylamino)methylideneamino)imidazole-4-carboxamide isomerase	1-(5-phospho-D-ribosyl)-5-[(5-phospho-D-ribosylamino)methylideneamino]imidazole-4-carboxamide [cytoplasm] -> 5-[(5-phospho-1-deoxy-D-ribulos-1-ylamino)methylideneamino]-1-(5-phospho-D-ribosyl)imidazole-4-carboxamide [cytoplasm]	YIL020C	0	Inf	0			R04640	YIL020C
r_0012	1-pyrroline-5-carboxylate dehydrogenase	1-pyrroline-5-carboxylate [mitochondrion] + 2 H2O [mitochondrion] + NAD [mitochondrion] <=> H+ [mitochondrion] + L-glutamate [mitochondrion] + NADH [mitochondrion]	YHR037W	-Inf	Inf	0		387737		YHR037W
r_0013	2,3-diketo-5-methylthio-1-phosphopentane degradation reaction	5-(methylsulfanyl)-2,3-dioxopentyl phosphate [cytoplasm] + 3 H2O [cytoplasm] -> 4-methylthio-2-oxobutanoate [cytoplasm] + formate [cytoplasm] + 6 H+ [cytoplasm] + phosphate [cytoplasm]	( YEL038W and YMR009W )	0	Inf	0		14506228		['YEL038W', 'YMR009W']
r_0014	2,5-diamino-6-ribitylamino-4(3H)-pyrimidinone 5'-phosphate deaminase	2,5-diamino-6-(5-phosphono)ribitylamino-4(3H)-pyrimidinone [cytoplasm] + H+ [cytoplasm] + H2O [cytoplasm] -> 5-amino-6-(5-phosphoribitylamino)uracil [cytoplasm] + ammonium [cytoplasm]	YOL066C	0	Inf	0		9068650		YOL066C
r_0015	2,5-diamino-6-ribosylamino-4(3H)-pyrimidinone 5'-phosphate reductase (NADPH)	2,5-diamino-4-hydroxy-6-(5-phosphoribosylamino)pyrimidine [cytoplasm] + H+ [cytoplasm] + NADPH [cytoplasm] -> 2,5-diamino-6-(5-phosphono)ribitylamino-4(3H)-pyrimidinone [cytoplasm] + NADP(+) [cytoplasm]	YBR153W	0	Inf	0		9068650	R09376	YBR153W
r_0016	2-aceto-2-hydroxybutanoate synthase	2-oxobutanoate [mitochondrion] + H+ [mitochondrion] + pyruvate [mitochondrion] -> (S)-2-acetyl-2-hydroxybutanoate [mitochondrion] + carbon dioxide [mitochondrion]	(( YCL009C and YMR108W ) or YMR108W )	0	Inf	0		8972574	R08648	[['YCL009C', 'YMR108W'], ['YMR108W']]
r_0017	2-amino-4-hydroxy-6-hydroxymethyldihydropteridine diphosphokinase	2-amino-6-(hydroxymethyl)-7,8-dihydropteridin-4-ol [mitochondrion] + ATP [mitochondrion] -> (2-amino-4-hydroxy-7,8-dihydropteridin-6-yl)methyl trihydrogen diphosphate [mitochondrion] + AMP [mitochondrion] + H+ [mitochondrion]	YNL256W	0	Inf	0			R03503	YNL256W
r_0018	2-aminoadipate transaminase	2-oxoadipic acid [cytoplasm] + L-glutamate [cytoplasm] <=> 2-oxoglutarate [cytoplasm] + L-2-aminoadipate [cytoplasm]	( YER152C or YGL202W or YJL060W )	-Inf	Inf	0		10714900; 19342587	R01939	[['YER152C', 'YGL202W', 'YJL060W']]
r_0019	2-dehydropantoate 2-reductase	2-dehydropantoate [cytoplasm] + H+ [cytoplasm] + NADPH [cytoplasm] -> (R)-pantoate [cytoplasm] + NADP(+) [cytoplasm]	YHR063C	0	Inf	0			R02472	YHR063C
r_0020	2-deoxy-D-arabino-heptulosonate 7-phosphate synthetase	D-erythrose 4-phosphate [mitochondrion] + H2O [mitochondrion] + phosphoenolpyruvate [mitochondrion] -> 7-phospho-2-dehydro-3-deoxy-D-arabino-heptonic acid [mitochondrion] + phosphate [mitochondrion]	YDR035W	0	Inf	0			R01826	YDR035W
r_0021	2-hexaprenyl-6-methoxy-1,4-benzoquinone methyltransferase	2-hexaprenyl-6-methoxy-1,4-benzoquinone [mitochondrion] + S-adenosyl-L-methionine [mitochondrion] -> 2-hexaprenyl-6-methoxy-3-methyl-1,4-benzoquinone [mitochondrion] + H+ [mitochondrion] + S-adenosyl-L-homocysteine [mitochondrion]	( YDR204W and YGL119W and YGR255C and YLR201C and YML110C and YOL096C and YOR125C )	0	Inf	0		15792955	R04983	['YDR204W', 'YGL119W', 'YGR255C', 'YLR201C', 'YML110C', 'YOL096C', 'YOR125C']
r_0022	2-hexaprenyl-6-methoxyphenol monooxygenase	2-hexaprenyl-6-methoxyphenol [mitochondrion] + oxygen [mitochondrion] -> 2-hexaprenyl-6-methoxy-1,4-benzoquinone [mitochondrion] + H2O [mitochondrion]	( YDR204W and YGL119W and YGR255C and YLR201C and YML110C and YOL096C and YOR125C )	0	Inf	0		15792955	R04982	['YDR204W', 'YGL119W', 'YGR255C', 'YLR201C', 'YML110C', 'YOL096C', 'YOR125C']
r_0023	2-isopropylmalate hydratase	2-isopropylmaleic acid [cytoplasm] + H2O [cytoplasm] <=> 2-isopropylmalate [cytoplasm]	YGL009C	-Inf	Inf	0		3071717	R03968	YGL009C
r_0024	2-isopropylmalate synthase	3-methyl-2-oxobutanoate [cytoplasm] + acetyl-CoA [cytoplasm] + H2O [cytoplasm] -> 2-isopropylmalate [cytoplasm] + coenzyme A [cytoplasm] + H+ [cytoplasm]	( YNL104C or YOR108W )	0	Inf	0		6090272	R01213	[['YNL104C', 'YOR108W']]
r_0025	2-isopropylmalate synthase	3-methyl-2-oxobutanoate [mitochondrion] + acetyl-CoA [mitochondrion] + H2O [mitochondrion] -> 2-isopropylmalate [mitochondrion] + coenzyme A [mitochondrion] + H+ [mitochondrion]	YNL104C	0	Inf	0		6090272	R01213	YNL104C
r_0026	2-keto-4-methylthiobutyrate transamination	4-methylthio-2-oxobutanoate [cytoplasm] + L-glutamate [cytoplasm] -> 2-oxoglutarate [cytoplasm] + L-methionine [cytoplasm]		0	Inf	0		14506228	R07396	nan
r_0027	2-methylcitrate dehydratase	homocitrate [mitochondrion] <=> but-1-ene-1,2,4-tricarboxylic acid [mitochondrion] + H2O [mitochondrion]	YDR234W	-Inf	Inf	0		5908136	R03444	YDR234W
r_0028	2-methylcitrate synthase	H2O [mitochondrion] + oxaloacetate [mitochondrion] + propionyl-CoA [mitochondrion] -> 2-methylcitrate [mitochondrion] + coenzyme A [mitochondrion] + H+ [mitochondrion]	YPR001W	0	Inf	0		16332871	R00931	YPR001W
r_0029	2-oxo-4-methyl-3-carboxypentanoate decarboxylation	(2S)-2-isopropyl-3-oxosuccinate [cytoplasm] + H+ [cytoplasm] -> 4-methyl-2-oxopentanoate [cytoplasm] + carbon dioxide [cytoplasm]	YJR148W	0	Inf	0			R01652	YJR148W
r_0030	2-oxo-4-methyl-3-carboxypentanoate decarboxylation	(2S)-2-isopropyl-3-oxosuccinate [mitochondrion] + H+ [mitochondrion] -> 4-methyl-2-oxopentanoate [mitochondrion] + carbon dioxide [mitochondrion]	YHR208W	0	Inf	0			R01652	YHR208W
r_0032	3',5'-bisphosphate nucleotidase	adenosine 3',5'-bismonophosphate [cytoplasm] + H2O [cytoplasm] -> AMP [cytoplasm] + phosphate [cytoplasm]	YOL064C	0	Inf	0		7809627	R00188	YOL064C
r_0033	3',5'-cyclic-nucleotide phosphodiesterase	3',5'-cyclic AMP [cytoplasm] + H2O [cytoplasm] -> AMP [cytoplasm] + H+ [cytoplasm]	( YGL248W or YOR360C )	0	Inf	0			R00191	[['YGL248W', 'YOR360C']]
r_0034	3',5'-cyclic-nucleotide phosphodiesterase	3',5'-cyclic dAMP [cytoplasm] + H2O [cytoplasm] -> dAMP [cytoplasm] + H+ [cytoplasm]	YOR360C	0	Inf	0				YOR360C
r_0035	3',5'-cyclic-nucleotide phosphodiesterase	3',5'-cyclic IMP [cytoplasm] + H2O [cytoplasm] -> H+ [cytoplasm] + IMP [cytoplasm]	YOR360C	0	Inf	0				YOR360C
r_0036	3',5'-cyclic-nucleotide phosphodiesterase	3',5'-cyclic GMP [cytoplasm] + H2O [cytoplasm] -> GMP [cytoplasm] + H+ [cytoplasm]	YOR360C	0	Inf	0			R01234	YOR360C
r_0037	3',5'-cyclic-nucleotide phosphodiesterase	3',5'-cyclic CMP [cytoplasm] + H2O [cytoplasm] -> CMP [cytoplasm] + H+ [cytoplasm]	YOR360C	0	Inf	0				YOR360C
r_0038	3,4-dihydroxy-2-butanone-4-phosphate synthase	D-ribulose 5-phosphate [cytoplasm] -> 2-hydroxy-3-oxobutyl phosphate [cytoplasm] + formate [cytoplasm] + H+ [cytoplasm]	YDR487C	0	Inf	0		12595523	R07281	YDR487C
r_0039	3-dehydroquinate dehydratase	3-dehydroquinate [cytoplasm] -> 3-dehydroshikimate [cytoplasm] + H2O [cytoplasm]	YDR127W	0	Inf	0			R03084	YDR127W
r_0040	3-dehydroquinate synthase	7-phospho-2-dehydro-3-deoxy-D-arabino-heptonic acid [cytoplasm] -> 3-dehydroquinate [cytoplasm] + phosphate [cytoplasm]	YDR127W	0	Inf	0		6355828	R03083	YDR127W
r_0041	3-dehydrosphinganine reductase	3-ketosphinganine [endoplasmic reticulum] + 2 H+ [endoplasmic reticulum] + NADPH [endoplasmic reticulum] -> NADP(+) [endoplasmic reticulum] + sphinganine [endoplasmic reticulum]	YBR265W	0	Inf	0		18296751; 9804843	R02978	YBR265W
r_0042	3-deoxy-D-arabino-heptulosonate 7-phosphate synthetase	D-erythrose 4-phosphate [cytoplasm] + H2O [cytoplasm] + phosphoenolpyruvate [cytoplasm] -> 7-phospho-2-dehydro-3-deoxy-D-arabino-heptonic acid [cytoplasm] + phosphate [cytoplasm]	( YBR249C or YDR035W )	0	Inf	0		2880280	R01826	[['YBR249C', 'YDR035W']]
r_0043	3-hexaprenyl-4,5-dihydroxybenzoate hydroxylase	3-hexaprenyl-4-hydroxybenzoic acid [cytoplasm] + 0.5 oxygen [cytoplasm] -> 3-hexaprenyl-4,5-dihydroxybenzoic acid [cytoplasm]		0	Inf	0		15792955	R06865	nan
r_0044	3-hexaprenyl-4-hydroxy-5-methoxybenzoate decarboxylase	3-hexaprenyl-4-hydroxy-5-methoxybenzoic acid [mitochondrion] + H+ [mitochondrion] -> 2-hexaprenyl-6-methoxyphenol [mitochondrion] + carbon dioxide [mitochondrion]		0	Inf	0		15792955	R06866	nan
r_0045	3-hydroxy-L-kynurenine hydrolase	3-hydroxy-L-kynurenine [cytoplasm] + H2O [cytoplasm] -> 3-hydroxyanthranilate [cytoplasm] + L-alanine [cytoplasm]	YLR231C	0	Inf	0			R02668	YLR231C
r_0057	3-hydroxyacyl-CoA dehydrogenase (3-oxotetradecanoyl-CoA)	(S)-3-hydroxytetradecanoyl-CoA [peroxisome] + NAD [peroxisome] -> 3-oxotetradecanoyl-CoA [peroxisome] + H+ [peroxisome] + NADH [peroxisome]	YKR009C	0	Inf	0			R04739	YKR009C
r_0058	3-hydroxyanthranilate 3,4-dioxygenase	3-hydroxyanthranilate [cytoplasm] + oxygen [cytoplasm] -> 2-amino-3-carboxymuconate-6-semialdehyde [cytoplasm] + H+ [cytoplasm]	YJR025C	0	Inf	0		9539135		YJR025C
r_0059	3-isopropylmalate 3-methyltransferase	(2R,3S)-3-isopropylmalate [cytoplasm] + S-adenosyl-L-methionine [cytoplasm] -> 3-hydroxy-2-isopropyl-4-methoxy-4-oxobutanoate [cytoplasm] + S-adenosyl-L-homocysteine [cytoplasm]	YER175C	0	Inf	0		15147181		YER175C
r_0060	3-isopropylmalate dehydratase	(2R,3S)-3-isopropylmalate [cytoplasm] <=> 2-isopropylmaleic acid [cytoplasm] + H2O [cytoplasm]	YGL009C	-Inf	Inf	0		3071717	R04001	YGL009C
r_0061	3-isopropylmalate dehydrogenase	(2R,3S)-3-isopropylmalate [cytoplasm] + NAD [cytoplasm] -> (2S)-2-isopropyl-3-oxosuccinate [cytoplasm] + H+ [cytoplasm] + NADH [cytoplasm]	YCL018W	0	Inf	0		6297759	R04426	YCL018W
r_0062	3-methyl-2-oxobutanoate decarboxylase	3-methyl-2-oxobutanoate [cytoplasm] + H+ [cytoplasm] -> carbon dioxide [cytoplasm] + isobutyraldehyde [cytoplasm]	( YGR087C or YLR044C or YLR134W )	0	Inf	0		12902239		[['YGR087C', 'YLR044C', 'YLR134W']]
r_0063	3-methyl-2-oxobutanoate hydroxymethyltransferase	3-methyl-2-oxobutanoate [mitochondrion] + 5,10-methylenetetrahydrofolate [mitochondrion] + H2O [mitochondrion] -> 2-dehydropantoate [mitochondrion] + THF [mitochondrion]	YBR176W	0	Inf	0			R01226	YBR176W
r_0064	3-methyl-2-oxopentanoate decarboxylase	(S)-3-methyl-2-oxopentanoate [cytoplasm] + H+ [cytoplasm] -> 2-methylbutanal [cytoplasm] + carbon dioxide [cytoplasm]	( YDL080C or YGR087C or YLR044C or YLR134W )	0	Inf	0		12902239	R03894	[['YDL080C', 'YGR087C', 'YLR044C', 'YLR134W']]
r_0065	3-phosphoshikimate 1-carboxyvinyltransferase	3-phosphoshikimic acid [cytoplasm] + phosphoenolpyruvate [cytoplasm] -> 5-O-(1-carboxyvinyl)-3-phosphoshikimic acid [cytoplasm] + phosphate [cytoplasm]	YDR127W	0	Inf	0		6355828	R03460	YDR127W
r_0066	4-amino-4-deoxychorismate synthase	chorismate [cytoplasm] + L-glutamine [cytoplasm] -> 4-amino-4-deoxychorismate [cytoplasm] + L-glutamate [cytoplasm]	YNR033W	0	Inf	0			R01716	YNR033W
r_0067	4-aminobenzoate synthase	4-amino-4-deoxychorismate [cytoplasm] -> 4-aminobenzoate [cytoplasm] + H+ [cytoplasm] + pyruvate [cytoplasm]	YMR289W	0	Inf	0			R05553	YMR289W
r_0068	4-aminobutyrate transaminase	2-oxoglutarate [cytoplasm] + gamma-aminobutyrate [cytoplasm] -> L-glutamate [cytoplasm] + succinic semialdehyde [cytoplasm]	YGR019W	0	Inf	0		10590462	R01648	YGR019W
r_0069	4-hydroxy-L-threonine synthase	4-(phosphonooxy)-L-threonine [cytoplasm] + H2O [cytoplasm] -> 4-hydroxy-L-threonine [cytoplasm] + phosphate [cytoplasm]	YCR053W	0	Inf	0		8082795	R05086	YCR053W
r_0070	4-hydroxybenzoate formation	4-hydroxybenzoyl-CoA [mitochondrion] + H2O [mitochondrion] -> 4-hydroxybenzoate [mitochondrion] + coenzyme A [mitochondrion] + H+ [mitochondrion]		0	Inf	0		11583838	R01301	nan
r_0072	4-methyl-2-oxopentanoate decarboxylase	4-methyl-2-oxopentanoate [cytoplasm] + H+ [cytoplasm] -> 3-methylbutanal [cytoplasm] + carbon dioxide [cytoplasm]	YDL080C	0	Inf	0		12902239		YDL080C
r_0073	4PP-IP5 depyrophosphorylation to IP6	4-diphospho-1D-myo-inositol pentakisphosphate [cytoplasm] + H2O [cytoplasm] <=> 2 H+ [cytoplasm] + myo-inositol hexakisphosphate [cytoplasm] + phosphate [cytoplasm]	( YLR410W or YOR163W )	-Inf	Inf	0		17412958	R05779	[['YLR410W', 'YOR163W']]
r_0074	4PP-IP5 pyrophosphorylation to 4,5-PP2-IP4	4-diphospho-1D-myo-inositol pentakisphosphate [cytoplasm] + ATP [cytoplasm] + 2 H+ [cytoplasm] -> 4,5-bis(diphospho)-1D-myo-inositol tetrakisphosphate [cytoplasm] + ADP [cytoplasm] + H2O [cytoplasm]	YDR017C	0	Inf	0		17412958		YDR017C
r_0075	5'-methylthioadenosine phosphorylase	5'-S-methyl-5'-thioadenosine [cytoplasm] + phosphate [cytoplasm] -> adenine [cytoplasm] + S-methyl-5-thio-alpha-D-ribose 1-phosphate [cytoplasm]	YLR017W	0	Inf	0		14506228	R01402	YLR017W
r_0076	5'-nucleotidase (CMP)	CMP [cytoplasm] + H2O [cytoplasm] -> cytidine [cytoplasm] + phosphate [cytoplasm]	( YER037W or YGL224C )	0	Inf	0		11934891; 23670538	R00511	[['YER037W', 'YGL224C']]
r_0077	5'-nucleotidase (IMP)	H2O [cytoplasm] + IMP [cytoplasm] -> inosine [cytoplasm] + phosphate [cytoplasm]	YOR155C	0	Inf	0		12735798	R01126	YOR155C
r_0078	5'-nucleotidase (UMP)	H2O [cytoplasm] + UMP [cytoplasm] -> phosphate [cytoplasm] + uridine [cytoplasm]	( YER037W or YGL224C )	0	Inf	0		11934891; 23670538	R00963	[['YER037W', 'YGL224C']]
r_0079	5'-phosphoribosylformyl glycinamidine synthetase	5'-phosphoribosyl-N-formylglycineamide [cytoplasm] + ATP [cytoplasm] + H2O [cytoplasm] + L-glutamine [cytoplasm] -> 5'-phosphoribosyl-N-formylglycineamidine [cytoplasm] + ADP [cytoplasm] + H+ [cytoplasm] + L-glutamate [cytoplasm] + phosphate [cytoplasm]	YGR061C	0	Inf	0			R04463	YGR061C	c
r_0080	5,10-methylenetetrahydrofolate reductase (NADPH)	5,10-methylenetetrahydrofolate [cytoplasm] + 2 H+ [cytoplasm] + NADPH [cytoplasm] -> 5-methyltetrahydrofolate [cytoplasm] + NADP(+) [cytoplasm]	( YGL125W or YPL023C )	0	Inf	0		21623372	R01224	[['YGL125W', 'YPL023C']]
r_0081	5-aminolevulinate synthase	H+ [mitochondrion] + L-glycine [mitochondrion] + succinyl-CoA [mitochondrion] -> 5-aminolevulinate [mitochondrion] + carbon dioxide [mitochondrion] + coenzyme A [mitochondrion]	YDR232W	0	Inf	0			R00830	YDR232W
r_0082	5-diphosphoinositol-1,2,3,4,6-pentakisphosphate diphosphohydrolase	5-diphospho-1D-myo-inositol pentakisphosphate [cytoplasm] + H2O [cytoplasm] -> 2 H+ [cytoplasm] + myo-inositol hexakisphosphate [cytoplasm] + phosphate [cytoplasm]	YOR163W	0	Inf	0		10419486	R05779	YOR163W
r_0083	5-diphosphoinositol-1,2,3,4,6-pentakisphosphate synthase	ATP [cytoplasm] + H+ [cytoplasm] + myo-inositol hexakisphosphate [cytoplasm] -> 5-diphospho-1D-myo-inositol pentakisphosphate [cytoplasm] + ADP [cytoplasm]	YDR017C	0	Inf	0		11956213	R09087	YDR017C
r_0084	5-formethyltetrahydrofolate cyclo-ligase	5-formyltetrahydrofolic acid [cytoplasm] + ATP [cytoplasm] -> 5,10-methenyl-THF [cytoplasm] + ADP [cytoplasm] + phosphate [cytoplasm]	YER183C	0	Inf	0			R02301	YER183C
r_0085	5-methyltetrahydropteroyltriglutamate-homocysteine S-methyltransferase	5-methyltetrahydropteroyltri-L-glutamic acid [cytoplasm] + L-homocysteine [cytoplasm] -> L-methionine [cytoplasm] + tetrahydropteroyltri-L-glutamic acid [cytoplasm]	YER091C	0	Inf	0		3542720	R04405	YER091C
r_0086	5-methylthio-5-deoxy-D-ribulose 1-phosphate dehydratase	S-methyl-5-thio-D-ribulose 1-phosphate [cytoplasm] -> 5-(methylsulfanyl)-2,3-dioxopentyl phosphate [cytoplasm] + H2O [cytoplasm]		0	Inf	0		14506228	R07392	nan
r_0087	5-methylthioribose-1-phosphate isomerase	S-methyl-5-thio-alpha-D-ribose 1-phosphate [cytoplasm] <=> S-methyl-5-thio-D-ribulose 1-phosphate [cytoplasm]		-Inf	Inf	0		14506228	R04420	nan
r_0088	5PP-IP5 pyrophosphorylation to 4,5-PP2-IP4	5-diphospho-1D-myo-inositol pentakisphosphate [cytoplasm] + 2 H+ [cytoplasm] + phosphate [cytoplasm] <=> 4,5-bis(diphospho)-1D-myo-inositol tetrakisphosphate [cytoplasm] + H2O [cytoplasm]	YLR410W	-Inf	Inf	0		17412958		YLR410W
r_0089	5PP-IP5 pyrophosphorylation to 5,6-PP2-IP4	5-diphospho-1D-myo-inositol pentakisphosphate [cytoplasm] + 2 H+ [cytoplasm] + phosphate [cytoplasm] <=> 5,6-bis(diphospho)-1D-myo-inositol tetrakisphosphate [cytoplasm] + H2O [cytoplasm]	YLR410W	-Inf	Inf	0		17412958		YLR410W
r_0090	6-phosphofructo-2-kinase	ATP [cytoplasm] + D-fructose 6-phosphate [cytoplasm] -> ADP [cytoplasm] + beta-D-fructose 2,6-bisphosphate [cytoplasm] + H+ [cytoplasm]	( YIL107C or YOL136C )	0	Inf	0				[['YIL107C', 'YOL136C']]
r_0091	6-phosphogluconolactonase	6-O-phosphono-D-glucono-1,5-lactone [cytoplasm] + H2O [cytoplasm] -> 6-phospho-D-gluconate [cytoplasm] + H+ [cytoplasm]	( YGR248W or YHR163W )	0	Inf	0		14454532	R02035	[['YGR248W', 'YHR163W']]
r_0092	6PP-IP5 depyrophosphorylation to IP6	6-diphospho-1D-myo-inositol pentakisphosphate [cytoplasm] + H2O [cytoplasm] <=> 2 H+ [cytoplasm] + myo-inositol hexakisphosphate [cytoplasm] + phosphate [cytoplasm]	( YLR410W or YOR163W )	-Inf	Inf	0		17412958	R05779	[['YLR410W', 'YOR163W']]
r_0093	6PP-IP5 pyrophosphorylation to 5,6-PP2-IP4	6-diphospho-1D-myo-inositol pentakisphosphate [cytoplasm] + ATP [cytoplasm] + 2 H+ [cytoplasm] -> 5,6-bis(diphospho)-1D-myo-inositol tetrakisphosphate [cytoplasm] + ADP [cytoplasm] + H2O [cytoplasm]	YDR017C	0	Inf	0		17412958		YDR017C
r_0094	8-amino-7-oxononanoate synthase	L-alanine [cytoplasm] + pimeloyl-CoA [cytoplasm] -> 8-amino-7-oxononanoate [cytoplasm] + carbon dioxide [cytoplasm] + coenzyme A [cytoplasm] + 4 H+ [cytoplasm]		0	Inf	0		16269718	R03210	nan
r_0095	acetaldehyde condensation	2 acetaldehyde [cytoplasm] -> (R)-acetoin [cytoplasm]	( YGR087C or YLR044C or YLR134W )	0	Inf	0		12902239		[['YGR087C', 'YLR044C', 'YLR134W']]
r_0096	acetohydroxy acid isomeroreductase	2-acetyllactic acid [mitochondrion] + H+ [mitochondrion] + NADPH [mitochondrion] -> (R)-2,3-dihydroxy-3-methylbutanoate [mitochondrion] + NADP(+) [mitochondrion]	YLR355C	0	Inf	0		8972574		YLR355C
r_0097	acetolactate synthase	H+ [mitochondrion] + 2 pyruvate [mitochondrion] -> 2-acetyllactic acid [mitochondrion] + carbon dioxide [mitochondrion]	(( YCL009C and YMR108W ) or YMR108W )	0	Inf	0		8972574	R00006	[['YCL009C', 'YMR108W'], ['YMR108W']]
r_0099	acetyl-CoA ACP transacylase	acetyl-CoA [mitochondrion] + ACP1 [mitochondrion] <=> acetyl-ACP [mitochondrion] + coenzyme A [mitochondrion]	YKL192C	-Inf	Inf	0		15387819	R01624	YKL192C
r_0100	acetyl-CoA C-acyltransferase (palmitoyl-CoA)	3-oxooctadecanoyl-CoA [peroxisome] + coenzyme A [peroxisome] -> acetyl-CoA [peroxisome] + palmitoyl-CoA [peroxisome]	YIL160C	0	Inf	0				YIL160C
r_0101	acetyl-CoA C-acyltransferase (tetracosanoyl-CoA)	3-oxohexacosanoyl-CoA [peroxisome] + coenzyme A [peroxisome] -> acetyl-CoA [peroxisome] + tetracosanoyl-CoA [peroxisome]	YIL160C	0	Inf	0				YIL160C
r_0102	acetyl-CoA C-acyltransferase (myristoyl-CoA)	3-oxopalmitoyl-CoA [peroxisome] + coenzyme A [peroxisome] -> acetyl-CoA [peroxisome] + myristoyl-CoA [peroxisome]	YIL160C	0	Inf	0			R03991	YIL160C
r_0103	acetyl-CoA C-acetyltransferase	2 acetyl-CoA [cytoplasm] -> acetoacetyl-CoA [cytoplasm] + coenzyme A [cytoplasm]	YPL028W	0	Inf	0				YPL028W
r_0104	acetyl-CoA C-acetyltransferase	2 acetyl-CoA [mitochondrion] -> acetoacetyl-CoA [mitochondrion] + coenzyme A [mitochondrion]	YPL028W	0	Inf	0				YPL028W
r_0105	acetyl-CoA C-acyltransferase (lauroyl-CoA)	3-oxotetradecanoyl-CoA [peroxisome] + coenzyme A [peroxisome] -> acetyl-CoA [peroxisome] + lauroyl-CoA [peroxisome]	YIL160C	0	Inf	0			R03858	YIL160C
r_0106	acetyl-CoA C-acyltransferase (octanoyl-CoA)	3-oxodecanoyl-CoA [peroxisome] + coenzyme A [peroxisome] -> acetyl-CoA [peroxisome] + octanoyl-CoA [peroxisome]	YIL160C	0	Inf	0			R03778	YIL160C
r_0107	acetyl-CoA C-acyltransferase (decanoyl-CoA)	3-oxolauroyl-CoA [peroxisome] + coenzyme A [peroxisome] -> acetyl-CoA [peroxisome] + decanoyl-CoA [peroxisome]	YIL160C	0	Inf	0			R04742	YIL160C
r_0108	acetyl-Coa carboxylase	acetyl-CoA [mitochondrion] + ATP [mitochondrion] + bicarbonate [mitochondrion] -> ADP [mitochondrion] + H+ [mitochondrion] + malonyl-CoA [mitochondrion] + phosphate [mitochondrion]	YMR207C	0	Inf	0		14761959	R00742	YMR207C
r_0109	acetyl-CoA carboxylase, reaction	acetyl-CoA [cytoplasm] + ATP [cytoplasm] + bicarbonate [cytoplasm] -> ADP [cytoplasm] + H+ [cytoplasm] + malonyl-CoA [cytoplasm] + phosphate [cytoplasm]	( YDL141W and YNR016C )	0	Inf	0			R00742	['YDL141W', 'YNR016C']
r_0111	acetyl-CoA hydrolase	acetyl-CoA [mitochondrion] + H2O [mitochondrion] -> acetate [mitochondrion] + coenzyme A [mitochondrion] + H+ [mitochondrion]	YBL015W	0	Inf	0			R00227	YBL015W
r_0112	acetyl-CoA synthetase	acetate [cytoplasm] + ATP [cytoplasm] + coenzyme A [cytoplasm] -> acetyl-CoA [cytoplasm] + AMP [cytoplasm] + diphosphate [cytoplasm]	( YAL054C or YLR153C )	0	Inf	0		8910545	R00235	[['YAL054C', 'YLR153C']]
r_0113	acetyl-CoA synthetase	acetate [mitochondrion] + ATP [mitochondrion] + coenzyme A [mitochondrion] -> acetyl-CoA [mitochondrion] + AMP [mitochondrion] + diphosphate [mitochondrion]	YAL054C	0	Inf	0			R00235	YAL054C
r_0114	acetyl-CoA synthetase nuclear	acetate [nucleus] + ATP [nucleus] + coenzyme A [nucleus] -> acetyl-CoA [nucleus] + AMP [nucleus] + diphosphate [nucleus]	YLR153C	0	Inf	0		16857587	R00235	YLR153C
r_0115	acetylglutamate kinase	ATP [mitochondrion] + N-acetyl-L-glutamate [mitochondrion] -> ADP [mitochondrion] + N-acetyl-L-gamma-glutamyl phosphate [mitochondrion]	YER069W	0	Inf	0			R02649	YER069W
r_0116	acid phosphatase (secreted)	FMN [extracellular] + H2O [extracellular] -> phosphate [extracellular] + riboflavin [extracellular]	( YAR071W or YBR093C )	0	Inf	0		13405892	R00548	[['YAR071W', 'YBR093C']]
r_0117	aconitase	2-methylcitrate [mitochondrion] <=> (2S,3R)-3-hydroxybutane-1,2,3-tricarboxylic acid [mitochondrion]	YPR002W	-Inf	Inf	0		16332871		YPR002W
r_0118	acteylornithine transaminase	2-acetamido-5-oxopentanoate [mitochondrion] + L-glutamate [mitochondrion] -> 2-oxoglutarate [mitochondrion] + N(2)-acetyl-L-ornithine [mitochondrion]	YOL140W	0	Inf	0			R02283	YOL140W
r_0119	acyl carrier protein synthase	coenzyme A [mitochondrion] + H2O [mitochondrion] -> adenosine 3',5'-bismonophosphate [mitochondrion] + 2 H+ [mitochondrion] + pantetheine 4'-phosphate [mitochondrion]	YPL148C	0	Inf	0				YPL148C
r_0120	acyl-CoA oxidase (decanoyl-CoA)	decanoyl-CoA [peroxisome] + oxygen [peroxisome] -> hydrogen peroxide [peroxisome] + trans-dec-2-enoyl-CoA [peroxisome]	YGL205W	0	Inf	0				YGL205W
r_0121	acyl-CoA oxidase (dodecanoyl-CoA)	lauroyl-CoA [peroxisome] + oxygen [peroxisome] -> hydrogen peroxide [peroxisome] + trans-dodec-2-enoyl-CoA [peroxisome]	YGL205W	0	Inf	0				YGL205W
r_0122	acyl-CoA oxidase (hexacosanoyl-CoA)	hexacosanoyl-CoA [peroxisome] + oxygen [peroxisome] -> hydrogen peroxide [peroxisome] + trans-hexacos-2-enoyl-CoA [peroxisome]	YGL205W	0	Inf	0				YGL205W
r_0123	acyl-CoA oxidase (hexadecanoyl-CoA)	oxygen [peroxisome] + palmitoyl-CoA [peroxisome] -> hexadec-2-enoyl-CoA [peroxisome] + hydrogen peroxide [peroxisome]	YGL205W	0	Inf	0				YGL205W
r_0124	acyl-CoA oxidase (octadecanoyl-CoA)	oxygen [peroxisome] + stearoyl-CoA [peroxisome] -> hydrogen peroxide [peroxisome] + trans-octadec-2-enoyl-CoA [peroxisome]	YGL205W	0	Inf	0				YGL205W
r_0125	acyl-CoA oxidase (tetradecanoyl-CoA)	myristoyl-CoA [peroxisome] + oxygen [peroxisome] -> hydrogen peroxide [peroxisome] + trans-tetradec-2-enoyl-CoA [peroxisome]	YGL205W	0	Inf	0				YGL205W
r_0126	acyl-CoA:sterol acyltransferase (oleoyl-CoA:episterol), ER membrane	oleoyl-CoA [endoplasmic reticulum membrane] + episterol [endoplasmic reticulum membrane] <=> coenzyme A [endoplasmic reticulum membrane] + episteryl oleate [endoplasmic reticulum membrane]	YCR048W	-Inf	Inf	0		10672016		YCR048W
r_0127	acyl-CoA:sterol acyltransferase (oleoyl-CoA:ergosterol), ER membrane	oleoyl-CoA [endoplasmic reticulum membrane] + ergosterol [endoplasmic reticulum membrane] <=> coenzyme A [endoplasmic reticulum membrane] + ergosteryl oleate [endoplasmic reticulum membrane]	( YCR048W or YNR019W )	-Inf	Inf	0		10672016		[['YCR048W', 'YNR019W']]
r_0128	acyl-CoA:sterol acyltransferase (oleoyl-CoA:fecosterol), ER membrane	oleoyl-CoA [endoplasmic reticulum membrane] + fecosterol [endoplasmic reticulum membrane] <=> coenzyme A [endoplasmic reticulum membrane] + fecosteryl oleate [endoplasmic reticulum membrane]	YCR048W	-Inf	Inf	0		10672016		YCR048W
r_0129	acyl-CoA:sterol acyltransferase (oleoyl-CoA:lanosterol), ER membrane	oleoyl-CoA [endoplasmic reticulum membrane] + lanosterol [endoplasmic reticulum membrane] <=> coenzyme A [endoplasmic reticulum membrane] + lanosteryl oleate [endoplasmic reticulum membrane]	YCR048W	-Inf	Inf	0		10672016		YCR048W
r_0130	acyl-CoA:sterol acyltransferase (oleoyl-CoA:zymosterol), ER membrane	oleoyl-CoA [endoplasmic reticulum membrane] + zymosterol [endoplasmic reticulum membrane] <=> coenzyme A [endoplasmic reticulum membrane] + zymosteryl oleate [endoplasmic reticulum membrane]	YCR048W	-Inf	Inf	0		10672016		YCR048W
r_0131	acyl-CoA:sterol acyltransferase (palmitoleoyl-CoA:episterol), ER membrane	palmitoleoyl-CoA [endoplasmic reticulum membrane] + episterol [endoplasmic reticulum membrane] <=> coenzyme A [endoplasmic reticulum membrane] + episteryl palmitoleate [endoplasmic reticulum membrane]	YCR048W	-Inf	Inf	0		10672016		YCR048W
r_0132	acyl-CoA:sterol acyltransferase (palmitoleoyl-CoA:ergosterol), ER membrane	palmitoleoyl-CoA [endoplasmic reticulum membrane] + ergosterol [endoplasmic reticulum membrane] <=> coenzyme A [endoplasmic reticulum membrane] + ergosteryl palmitoleate [endoplasmic reticulum membrane]	( YCR048W or YNR019W )	-Inf	Inf	0		10672016		[['YCR048W', 'YNR019W']]
r_0133	acyl-CoA:sterol acyltransferase (palmitoleoyl-CoA:fecosterol), ER membrane	palmitoleoyl-CoA [endoplasmic reticulum membrane] + fecosterol [endoplasmic reticulum membrane] <=> coenzyme A [endoplasmic reticulum membrane] + fecosteryl palmitoleate [endoplasmic reticulum membrane]	YCR048W	-Inf	Inf	0		10672016		YCR048W
r_0134	acyl-CoA:sterol acyltransferase (palmitoleoyl-CoA:lanosterol), ER membrane	palmitoleoyl-CoA [endoplasmic reticulum membrane] + lanosterol [endoplasmic reticulum membrane] <=> coenzyme A [endoplasmic reticulum membrane] + lanosteryl palmitoleate [endoplasmic reticulum membrane]	YCR048W	-Inf	Inf	0		10672016		YCR048W
r_0135	acyl-CoA:sterol acyltransferase (palmitoleoyl-CoA:zymosterol), ER membrane	palmitoleoyl-CoA [endoplasmic reticulum membrane] + zymosterol [endoplasmic reticulum membrane] <=> coenzyme A [endoplasmic reticulum membrane] + zymosteryl palmitoleate [endoplasmic reticulum membrane]	YCR048W	-Inf	Inf	0		10672016		YCR048W
r_0137	acylation of GPI inositol at 2 position, GPI-anchor assembly, step 3	6-(alpha-D-glucosaminyl)-1-phosphatidyl-1D-myo-inositol [endoplasmic reticulum] + palmitoyl-CoA [endoplasmic reticulum] <=> 6-(alpha-D-glucosaminyl)-O-acyl-1-phosphatidyl-1D-myo-inositol [endoplasmic reticulum] + coenzyme A [endoplasmic reticulum]	YJL091C	-Inf	Inf	0		12714589		YJL091C
r_0138	adenine deaminase	adenine [cytoplasm] + H+ [cytoplasm] + H2O [cytoplasm] -> ammonium [cytoplasm] + hypoxanthine [cytoplasm]	YNL141W	0	Inf	0				YNL141W
r_0139	adenine phosphoribosyltransferase	adenine [cytoplasm] + PRPP [cytoplasm] -> AMP [cytoplasm] + diphosphate [cytoplasm]	YML022W	0	Inf	0		9864350	R00190	YML022W
r_0140	adenosine deaminase	adenosine [cytoplasm] + H+ [cytoplasm] + H2O [cytoplasm] -> ammonium [cytoplasm] + inosine [cytoplasm]	YNL141W	0	Inf	0				YNL141W
r_0142	adenosine kinase	adenosine [cytoplasm] + ATP [cytoplasm] -> ADP [cytoplasm] + AMP [cytoplasm] + H+ [cytoplasm]	YJR105W	0	Inf	0			R00185	YJR105W
r_0143	adenosine monophosphate deaminase	AMP [cytoplasm] + H+ [cytoplasm] + H2O [cytoplasm] -> ammonium [cytoplasm] + IMP [cytoplasm]	YML035C	0	Inf	0				YML035C
r_0144	adenosylhomocysteinase	H2O [cytoplasm] + S-adenosyl-L-homocysteine [cytoplasm] -> adenosine [cytoplasm] + L-homocysteine [cytoplasm]	YER043C	0	Inf	0		15556636	R00192	YER043C
r_0145	adenosylmethionine decarboxylase	H+ [cytoplasm] + S-adenosyl-L-methionine [cytoplasm] -> carbon dioxide [cytoplasm] + S-adenosylmethioninamine [cytoplasm]	YOL052C	0	Inf	0		3087344	R00178	YOL052C
r_0146	adenosylmethionine-8-amino-7-oxononanoate transaminase	8-amino-7-oxononanoate [cytoplasm] + S-adenosyl-L-methionine [cytoplasm] <=> 7,8-diaminononanoate [cytoplasm] + S-adenosyl-4-methylthio-2-oxobutanoate [cytoplasm]	YNR058W	-Inf	Inf	0			R03231	YNR058W
r_0147	adenylate cyclase	ATP [cytoplasm] -> 3',5'-cyclic AMP [cytoplasm] + diphosphate [cytoplasm]	YJL005W	0	Inf	0			R00089	YJL005W
r_0148	adenylate kinase	AMP [cytoplasm] + ATP [cytoplasm] -> 2 ADP [cytoplasm]	YDR226W	0	Inf	0			R00127	YDR226W
r_0149	adenylate kinase	AMP [mitochondrion] + ATP [mitochondrion] -> 2 ADP [mitochondrion]	YER170W	0	Inf	0			R00127	YER170W
r_0150	adenylate kinase (GTP)	AMP [mitochondrion] + GTP [mitochondrion] <=> ADP [mitochondrion] + GDP [mitochondrion]	YER170W	-Inf	Inf	0				YER170W
r_0151	adenylosuccinate lyase (AICAR)	5'-phosphoribosyl-4-(N-succinocarboxamide)-5-aminoimidazole [cytoplasm] -> AICAR [cytoplasm] + fumarate [cytoplasm]	YLR359W	0	Inf	0			R04559	YLR359W	c
r_0152	adenylosuccinate lyase	adenylo-succinate [cytoplasm] <=> AMP [cytoplasm] + fumarate [cytoplasm]	YLR359W	-Inf	Inf	0			R01083	YLR359W
r_0153	adenylosuccinate synthase	GTP [cytoplasm] + IMP [cytoplasm] + L-aspartate [cytoplasm] -> adenylo-succinate [cytoplasm] + GDP [cytoplasm] + 2 H+ [cytoplasm] + phosphate [cytoplasm]	YNL220W	0	Inf	0			R01135	YNL220W
r_0154	adenylyl-sulfate kinase	5'-adenylyl sulfate [cytoplasm] + ATP [cytoplasm] -> 3'-phospho-5'-adenylyl sulfate [cytoplasm] + ADP [cytoplasm] + H+ [cytoplasm]	YKL001C	0	Inf	0		1654509	R00509	YKL001C
r_0155	ADP-ribose 2,3-cyclic phosphodiesterase	2',3'-cyclic AMP [cytoplasm] + H+ [cytoplasm] + H2O [cytoplasm] -> adenosine 2'-phosphate [cytoplasm]	YGR247W	0	Inf	0		10734185		YGR247W
r_0156	alanine glyoxylate aminotransferase	glyoxylate [cytoplasm] + L-alanine [cytoplasm] -> L-glycine [cytoplasm] + pyruvate [cytoplasm]	YFL030W	0	Inf	0			R00369	YFL030W
r_0157	alanyl-tRNA synthetase	ATP [cytoplasm] + L-alanine [cytoplasm] + tRNA(Ala), cytoplasmic [cytoplasm] -> Ala-tRNA(Ala) [cytoplasm] + AMP [cytoplasm] + diphosphate [cytoplasm]	YOR335C	0	Inf	0		7761427	R03038	YOR335C
r_0158	alcohol acetyltransferase (2-methylbutanol)	2-methylbutanol [cytoplasm] + acetyl-CoA [cytoplasm] -> 2-methylbutyl acetate [cytoplasm] + coenzyme A [cytoplasm]	( YGR177C or YOR377W )	0	Inf	0		12957907		[['YGR177C', 'YOR377W']]
r_0159	alcohol acetyltransferase (ethanol)	acetyl-CoA [cytoplasm] + ethanol [cytoplasm] -> coenzyme A [cytoplasm] + ethyl acetate [cytoplasm]	( YGR177C or YOR377W )	0	Inf	0		12957907		[['YGR177C', 'YOR377W']]
r_0160	alcohol acetyltransferase (isoamyl alcohol)	acetyl-CoA [cytoplasm] + isoamylol [cytoplasm] -> coenzyme A [cytoplasm] + isoamyl acetate [cytoplasm]	( YGR177C or YOR377W )	0	Inf	0		12957907		[['YGR177C', 'YOR377W']]
r_0161	alcohol acetyltransferase (isobutyl alcohol)	acetyl-CoA [cytoplasm] + isobutanol [cytoplasm] -> coenzyme A [cytoplasm] + isobutyl acetate [cytoplasm]	( YGR177C or YOR377W )	0	Inf	0		12957907		[['YGR177C', 'YOR377W']]
r_0162	alcohol acetyltransferase (phenylethanol alcohol)	2-phenylethanol [cytoplasm] + acetyl-CoA [cytoplasm] -> coenzyme A [cytoplasm] + phenethyl acetate [cytoplasm]	( YGR177C or YOR377W )	0	Inf	0		12957907		[['YGR177C', 'YOR377W']]
r_0163	alcohol dehydrogenase (ethanol to acetaldehyde)	ethanol [cytoplasm] + NAD [cytoplasm] -> acetaldehyde [cytoplasm] + H+ [cytoplasm] + NADH [cytoplasm]	YMR303C	0	Inf	0		12702265	R00754	YMR303C
r_0164	alcohol dehydrogenase (glycerol, NADP)	D-glyceraldehyde [cytoplasm] + H+ [cytoplasm] + NADPH [cytoplasm] -> glycerol [cytoplasm] + NADP(+) [cytoplasm]	( YDR368W or YHR104W )	0	Inf	0		12210903	R01041	[['YDR368W', 'YHR104W']]
r_0165	mitochondrial alcohol dehydrogenase	acetaldehyde [mitochondrion] + H+ [mitochondrion] + NADH [mitochondrion] -> ethanol [mitochondrion] + NAD [mitochondrion]	( YGL256W or YMR083W )	0	Inf	0		12499363	R00754	[['YGL256W', 'YMR083W']]
r_0166	aldehyde dehydrogenase (2-methylbutanol, NAD)	2-methylbutanal [cytoplasm] + H+ [cytoplasm] + NADH [cytoplasm] -> 2-methylbutanol [cytoplasm] + NAD [cytoplasm]	( YBR145W or YDL168W or YOL086C )	0	Inf	0		12702265		[['YBR145W', 'YDL168W', 'YOL086C']]
r_0167	aldehyde dehydrogenase (2-methylbutanol, NAD)	2-methylbutanal [mitochondrion] + H+ [mitochondrion] + NADH [mitochondrion] -> 2-methylbutanol [mitochondrion] + NAD [mitochondrion]	( YGL256W or YMR083W )	0	Inf	0		12499363		[['YGL256W', 'YMR083W']]
r_0168	aldehyde dehydrogenase (2-methylbutanol, NADP)	2-methylbutanal [cytoplasm] + H+ [cytoplasm] + NADPH [cytoplasm] -> 2-methylbutanol [cytoplasm] + NADP(+) [cytoplasm]	( YCR105W or YDR368W or YMR318C )	0	Inf	0		12210903; 12423374		[['YCR105W', 'YDR368W', 'YMR318C']]
r_0169	aldehyde dehydrogenase (2-phenylethanol, NAD)	H+ [cytoplasm] + NADH [cytoplasm] + phenylacetaldehyde [cytoplasm] -> 2-phenylethanol [cytoplasm] + NAD [cytoplasm]	( YBR145W or YDL168W or YOL086C )	0	Inf	0		12702265	R02611	[['YBR145W', 'YDL168W', 'YOL086C']]
r_0170	aldehyde dehydrogenase (2-phenylethanol, NAD)	H+ [mitochondrion] + NADH [mitochondrion] + phenylacetaldehyde [mitochondrion] -> 2-phenylethanol [mitochondrion] + NAD [mitochondrion]	( YGL256W or YMR083W )	0	Inf	0		12499363	R02611	[['YGL256W', 'YMR083W']]
r_0171	aldehyde dehydrogenase (2-phenylethanol, NADP)	H+ [cytoplasm] + NADPH [cytoplasm] + phenylacetaldehyde [cytoplasm] -> 2-phenylethanol [cytoplasm] + NADP(+) [cytoplasm]	( YCR105W or YMR318C )	0	Inf	0		11742541; 12423374		[['YCR105W', 'YMR318C']]
r_0172	aldehyde dehydrogenase (3-aminopropanal, NAD)	3-aminopropanal [cytoplasm] + H2O [cytoplasm] + NAD [cytoplasm] -> beta-alanine [cytoplasm] + 2 H+ [cytoplasm] + NADH [cytoplasm]	( YMR169C or YMR170C )	0	Inf	0		12586697		[['YMR169C', 'YMR170C']]
r_0173	aldehyde dehydrogenase (acetaldehyde, NADP)	acetaldehyde [cytoplasm] + H2O [cytoplasm] + NADP(+) [cytoplasm] -> acetate [cytoplasm] + 2 H+ [cytoplasm] + NADPH [cytoplasm]	YPL061W	0	Inf	0		15256563	R00711	YPL061W
r_0174	aldehyde dehydrogenase (acetylaldehyde, NAD)	acetaldehyde [mitochondrion] + H2O [mitochondrion] + NAD [mitochondrion] -> acetate [mitochondrion] + 2 H+ [mitochondrion] + NADH [mitochondrion]	YOR374W	0	Inf	0		15256563	R00710	YOR374W
r_0175	aldehyde dehydrogenase (acetylaldehyde, NADP)	acetaldehyde [mitochondrion] + H2O [mitochondrion] + NADP(+) [mitochondrion] -> acetate [mitochondrion] + 2 H+ [mitochondrion] + NADPH [mitochondrion]	( YER073W or YOR374W )	0	Inf	0		15256563	R00711	[['YER073W', 'YOR374W']]
r_0176	aldehyde dehydrogenase (indole-3-acetaldehyde, NAD)	H2O [mitochondrion] + indol-3-ylacetaldehyde [mitochondrion] + NAD [mitochondrion] -> 2 H+ [mitochondrion] + indole-3-acetate [mitochondrion] + NADH [mitochondrion]	YOR374W	0	Inf	0			R02678	YOR374W
r_0177	aldehyde dehydrogenase (indole-3-acetaldehyde, NADP)	H2O [cytoplasm] + indol-3-ylacetaldehyde [cytoplasm] + NADP(+) [cytoplasm] -> 2 H+ [cytoplasm] + indole-3-acetate [cytoplasm] + NADPH [cytoplasm]	YPL061W	0	Inf	0				YPL061W
r_0178	aldehyde dehydrogenase (indole-3-acetaldehyde, NADP)	H2O [mitochondrion] + indol-3-ylacetaldehyde [mitochondrion] + NADP(+) [mitochondrion] -> 2 H+ [mitochondrion] + indole-3-acetate [mitochondrion] + NADPH [mitochondrion]	( YER073W or YOR374W )	0	Inf	0		9675847		[['YER073W', 'YOR374W']]
r_0179	aldehyde dehydrogenase (isoamyl alcohol, NAD)	3-methylbutanal [cytoplasm] + H+ [cytoplasm] + NADH [cytoplasm] -> isoamylol [cytoplasm] + NAD [cytoplasm]	( YBR145W or YDL168W or YOL086C )	0	Inf	0		12702265	R05685	[['YBR145W', 'YDL168W', 'YOL086C']]
r_0180	aldehyde dehydrogenase (isoamyl alcohol, NAD)	3-methylbutanal [mitochondrion] + H+ [mitochondrion] + NADH [mitochondrion] -> isoamylol [mitochondrion] + NAD [mitochondrion]	( YGL256W or YMR083W )	0	Inf	0		12499363	R05685	[['YGL256W', 'YMR083W']]
r_0181	aldehyde dehydrogenase (isoamyl alcohol, NADP)	3-methylbutanal [cytoplasm] + H+ [cytoplasm] + NADPH [cytoplasm] -> isoamylol [cytoplasm] + NADP(+) [cytoplasm]	( YCR105W or YMR318C )	0	Inf	0		11742541; 12423374	R05686	[['YCR105W', 'YMR318C']]
r_0182	aldehyde dehydrogenase (isobutyl alcohol, NAD)	H+ [cytoplasm] + isobutyraldehyde [cytoplasm] + NADH [cytoplasm] -> isobutanol [cytoplasm] + NAD [cytoplasm]	( YBR145W or YDL168W or YOL086C )	0	Inf	0		12702265		[['YBR145W', 'YDL168W', 'YOL086C']]
r_0183	aldehyde dehydrogenase (isobutyl alcohol, NAD)	H+ [mitochondrion] + isobutyraldehyde [mitochondrion] + NADH [mitochondrion] -> isobutanol [mitochondrion] + NAD [mitochondrion]	( YGL256W or YMR083W )	0	Inf	0		12499363		[['YGL256W', 'YMR083W']]
r_0184	aldehyde dehydrogenase (isobutyl alcohol, NADP)	H+ [cytoplasm] + isobutyraldehyde [cytoplasm] + NADPH [cytoplasm] -> isobutanol [cytoplasm] + NADP(+) [cytoplasm]	( YCR105W or YMR318C )	0	Inf	0		11742541; 12423374		[['YCR105W', 'YMR318C']]
r_0185	aldehyde dehydrogenase (phenylacetaldehyde, NAD)	H2O [cytoplasm] + NAD [cytoplasm] + phenylacetaldehyde [cytoplasm] -> 2 H+ [cytoplasm] + NADH [cytoplasm] + phenylacetic acid [cytoplasm]	( YMR169C or YMR170C )	0	Inf	0		8801420	R02536	[['YMR169C', 'YMR170C']]
r_0186	aldehyde dehydrogenase (tryptophol, NAD)	H+ [cytoplasm] + indol-3-ylacetaldehyde [cytoplasm] + NADH [cytoplasm] -> NAD [cytoplasm] + tryptophol [cytoplasm]	( YBR145W or YDL168W or YOL086C )	0	Inf	0		12702265	R02679	[['YBR145W', 'YDL168W', 'YOL086C']]
r_0187	aldehyde dehydrogenase (tryptophol, NAD)	H+ [mitochondrion] + indol-3-ylacetaldehyde [mitochondrion] + NADH [mitochondrion] -> NAD [mitochondrion] + tryptophol [mitochondrion]	( YGL256W or YMR083W )	0	Inf	0		12499363	R02679	[['YGL256W', 'YMR083W']]
r_0188	alkaline phosphatase (dihydroneopterin)	7,8-dihydroneopterin 3'-triphosphate [cytoplasm] + 3 H2O [cytoplasm] -> 7,8-dihydroneopterin [cytoplasm] + 2 H+ [cytoplasm] + 3 phosphate [cytoplasm]	YDR481C	0	Inf	0			R04620	YDR481C
r_0189	allantoate amidinohydrolase	allantoate [cytoplasm] + H2O [cytoplasm] <=> urea [cytoplasm] + ureidoglycolic acid [cytoplasm]	YIR029W	-Inf	Inf	0		4604238		YIR029W
r_0190	allantoinase, reaction	allantoin [cytoplasm] + H2O [cytoplasm] <=> allantoate [cytoplasm] + H+ [cytoplasm]	YIR027C	-Inf	Inf	0		4604238	R02424	YIR027C
r_0191	allophanate hydrolase	3 H+ [cytoplasm] + H2O [cytoplasm] + urea-1-carboxylic acid [cytoplasm] -> 2 ammonium [cytoplasm] + 2 carbon dioxide [cytoplasm]	YBR208C	0	Inf	0				YBR208C
r_0192	alpha 1,2-mannosyltransferase	beta-D-mannosyldiacetylchitobiosyldiphosphodolichol [Golgi] + GDP-alpha-D-mannose [Golgi] -> alpha-D-mannosyl-beta-D-mannosyldiacetylchitobiosyldiphosphodolichol [Golgi] + GDP [Golgi] + H+ [Golgi]	( YBR199W or YBR205W or YDR483W or YJL139C or YKR061W or YNL029C or YOR099W or YPL053C )	0	Inf	0		14752117; 21623372; 8631921; 9020857	R05002	[['YBR199W', 'YBR205W', 'YDR483W', 'YJL139C', 'YKR061W', 'YNL029C', 'YOR099W', 'YPL053C']]
r_0193	alpha,alpha-trehalase	H2O [vacuole] + trehalose [vacuole] -> 2 D-glucose [vacuole]	YPR026W	0	Inf	0				YPR026W
r_0194	alpha,alpha-trehalase	H2O [cytoplasm] + trehalose [cytoplasm] -> 2 D-glucose [cytoplasm]	YDR001C	0	Inf	0		8764988		YDR001C
r_0195	alpha,alpha-trehalose-phosphate synthase (UDP-forming)	D-glucose 6-phosphate [cytoplasm] + UDP-D-glucose [cytoplasm] -> alpha,alpha-trehalose 6-phosphate [cytoplasm] + H+ [cytoplasm] + UDP [cytoplasm]	(( YBR126C and YDR074W and YML100W ) or ( YBR126C and YDR074W and YMR261C ))	0	Inf	0		21623372	R00836	[['YBR126C', 'YDR074W', 'YML100W'], ['YBR126C', 'YDR074W', 'YMR261C']]
r_0198	alpha-glucosidase	H2O [cytoplasm] + maltose [cytoplasm] -> 2 D-glucose [cytoplasm]	( YBR299W or YGR287C or YGR292W or YIL172C or YJL216C or YJL221C )	0	Inf	0			R01555	[['YBR299W', 'YGR287C', 'YGR292W', 'YIL172C', 'YJL216C', 'YJL221C']]
r_0199	amidase	4-guanidinobutanamide [cytoplasm] + H2O [cytoplasm] -> 4-guanidinobutanoic acid [cytoplasm] + ammonium [cytoplasm]	YMR293C	0	Inf	0				YMR293C
r_0200	Aminoacetone:oxygen oxidoreductase(deaminating)(flavin-containing)	aminoacetone [cytoplasm] + H2O [cytoplasm] + oxygen [cytoplasm] -> ammonium [cytoplasm] + hydrogen peroxide [cytoplasm] + methylglyoxal [cytoplasm]		0	Inf	0		3086094		nan
r_0201	Aminobutyraldehyde dehydrogenase	4-aminobutanal [mitochondrion] + H2O [mitochondrion] + NAD [mitochondrion] -> gamma-aminobutyrate [mitochondrion] + 2 H+ [mitochondrion] + NADH [mitochondrion]	YOR374W	0	Inf	0			R02549	YOR374W
r_0202	anthranilate phosphoribosyltransferase	anthranilate [cytoplasm] + PRPP [cytoplasm] -> diphosphate [cytoplasm] + N-(5-phospho-beta-D-ribosyl)anthranilate [cytoplasm]	YDR354W	0	Inf	0			R01073	YDR354W
r_0203	anthranilate synthase	chorismate [cytoplasm] + L-glutamine [cytoplasm] -> anthranilate [cytoplasm] + H+ [cytoplasm] + L-glutamate [cytoplasm] + pyruvate [cytoplasm]	( YER090W and YKL211C )	0	Inf	0		8001582	R00986	['YER090W', 'YKL211C']
r_0204	Ap4A hydrolase	H2O [cytoplasm] + P(1),P(4)-bis(5'-adenosyl) tetraphosphate [cytoplasm] <=> 2 ADP [cytoplasm] + 2 H+ [cytoplasm]	YDR305C	-Inf	Inf	0			R00125	YDR305C
r_0205	arabinose reductase	H+ [cytoplasm] + L-arabinose [cytoplasm] + NADPH [cytoplasm] -> L-arabinitol [cytoplasm] + NADP(+) [cytoplasm]	YHR104W	0	Inf	0			R01759	YHR104W
r_0206	arginase	H2O [cytoplasm] + L-arginine [cytoplasm] -> ornithine [cytoplasm] + urea [cytoplasm]	YPL111W	0	Inf	0				YPL111W
r_0207	argininosuccinate lyase	(N(omega)-L-arginino)succinic acid [cytoplasm] <=> fumarate [cytoplasm] + L-arginine [cytoplasm]	YHR018C	-Inf	Inf	0			R01086	YHR018C
r_0208	argininosuccinate synthase	ATP [cytoplasm] + L-aspartate [cytoplasm] + L-citrulline [cytoplasm] <=> (N(omega)-L-arginino)succinic acid [cytoplasm] + AMP [cytoplasm] + diphosphate [cytoplasm] + H+ [cytoplasm]	YOL058W	-Inf	Inf	0		35347	R01954	YOL058W
r_0209	arginyl-tRNA synthetase	ATP [cytoplasm] + L-arginine [cytoplasm] + tRNA(Arg), cytoplasmic [cytoplasm] -> AMP [cytoplasm] + Arg-tRNA(Arg) [cytoplasm] + diphosphate [cytoplasm]	YDR341C	0	Inf	0			R03646	YDR341C
r_0210	arginyl-tRNA synthetase	ATP [mitochondrion] + L-arginine [mitochondrion] + tRNA(Arg), mitchondrial [mitochondrion] -> AMP [mitochondrion] + Arg-tRNA(Arg) [mitochondrion] + diphosphate [mitochondrion]	YHR091C	0	Inf	0			R03646	YHR091C
r_0211	asparagine synthase (glutamine-hydrolysing)	ATP [cytoplasm] + H2O [cytoplasm] + L-aspartate [cytoplasm] + L-glutamine [cytoplasm] -> AMP [cytoplasm] + diphosphate [cytoplasm] + H+ [cytoplasm] + L-asparagine [cytoplasm] + L-glutamate [cytoplasm]	( YGR124W or YPR145W )	0	Inf	0		9881155	R00578	[['YGR124W', 'YPR145W']]
r_0212	Asparaginyl-tRNA synthetase	ATP [cytoplasm] + L-asparagine [cytoplasm] + tRNA(Asn), cytoplasmic [cytoplasm] -> AMP [cytoplasm] + Asn-tRNA(Asn) [cytoplasm] + diphosphate [cytoplasm]	YHR019C	0	Inf	0		9605503	R03648	YHR019C
r_0213	asparaginyl-tRNA synthetase, miotchondrial	ATP [mitochondrion] + L-asparagine [mitochondrion] + tRNA(Asn), mitchondrial [mitochondrion] -> AMP [mitochondrion] + Asn-tRNA(Asn) [mitochondrion] + diphosphate [mitochondrion]	YCR024C	0	Inf	0		9605503	R03648	YCR024C
r_0214	aspartate carbamoyltransferase	carbamoyl phosphate [cytoplasm] + L-aspartate [cytoplasm] -> H+ [cytoplasm] + N-carbamoyl-L-aspartate [cytoplasm] + phosphate [cytoplasm]	YJL130C	0	Inf	0			R01397	YJL130C
r_0215	aspartate kinase	ATP [cytoplasm] + L-aspartate [cytoplasm] -> 4-phospho-L-aspartate [cytoplasm] + ADP [cytoplasm]	YER052C	0	Inf	0		9315655	R00480	YER052C
r_0216	aspartate transaminase	2-oxoglutarate [cytoplasm] + L-aspartate [cytoplasm] <=> L-glutamate [cytoplasm] + oxaloacetate [cytoplasm]	YLR027C	-Inf	Inf	0		1859361	R00355	YLR027C
r_0217	aspartate transaminase	L-glutamate [mitochondrion] + oxaloacetate [mitochondrion] -> 2-oxoglutarate [mitochondrion] + L-aspartate [mitochondrion]	YKL106W	0	Inf	0		1482685	R00355	YKL106W
r_0218	aspartate transaminase	2-oxoglutarate [peroxisome] + L-aspartate [peroxisome] <=> L-glutamate [peroxisome] + oxaloacetate [peroxisome]	YLR027C	-Inf	Inf	0		9288922	R00355	YLR027C
r_0219	aspartate-semialdehyde dehydrogenase	4-phospho-L-aspartate [cytoplasm] + H+ [cytoplasm] + NADPH [cytoplasm] -> L-aspartate 4-semialdehyde [cytoplasm] + NADP(+) [cytoplasm] + phosphate [cytoplasm]	YDR158W	0	Inf	0		2570346	R02291	YDR158W
r_0220	Aspartyl-tRNA synthetase	ATP [cytoplasm] + L-aspartate [cytoplasm] + tRNA(Asp), cytoplasmic [cytoplasm] -> AMP [cytoplasm] + Asp-tRNA(Asp) [cytoplasm] + diphosphate [cytoplasm]	YLL018C	0	Inf	0		3902099	R05577	YLL018C
r_0221	Aspartyl-tRNA synthetase	ATP [mitochondrion] + L-aspartate [mitochondrion] + tRNA(Asp), mitchondrial [mitochondrion] -> AMP [mitochondrion] + Asp-tRNA(Asp) [mitochondrion] + diphosphate [mitochondrion]	YPL104W	0	Inf	0		2668951	R05577	YPL104W
r_0222	ATP adenylyltransferase	ADP [cytoplasm] + ATP [cytoplasm] + H+ [cytoplasm] -> P(1),P(4)-bis(5'-adenosyl) tetraphosphate [cytoplasm] + phosphate [cytoplasm]	YDR530C	0	Inf	0			R00126	YDR530C
r_0223	ATP adenylyltransferase	ADP [cytoplasm] + GTP [cytoplasm] + H+ [cytoplasm] -> P1-(5'-adenosyl),P4-(5'-guanosyl) tetraphosphate [cytoplasm] + phosphate [cytoplasm]	YCL050C	0	Inf	0				YCL050C
r_0224	ATP adenylyltransferase	GDP [cytoplasm] + GTP [cytoplasm] + H+ [cytoplasm] -> P(1),P(4)-bis(5'-guanosyl) tetraphosphate [cytoplasm] + phosphate [cytoplasm]	YCL050C	0	Inf	0				YCL050C
r_0225	ATP phosphoribosyltransferase	ATP [cytoplasm] + PRPP [cytoplasm] -> 5-phosphoribosyl-ATP [cytoplasm] + diphosphate [cytoplasm]	YER055C	0	Inf	0			R01071	YER055C
r_0226	ATP synthase	ADP [mitochondrion] + 4 H+ [cytoplasm] + phosphate [mitochondrion] -> ATP [mitochondrion] + 3 H+ [mitochondrion] + H2O [mitochondrion]	(( Q0080 and Q0085 and Q0130 and YBL099W and YBR039W and YDL004W and YDR298C and YDR322C-A and YDR377W and YJR121W and YKL016C and YLR295C and YML081C-A and YPL078C and YPL271W ) or ( Q0080 and Q0085 and Q0130 and YBL099W and YBR039W and YDL004W and YDR298C and YDR377W and YJR121W and YKL016C and YLR295C and YML081C-A and YPL078C and YPL271W and YPR020W ))	0	Inf	0		6223276; 10576729		[['Q0080', 'Q0085', 'Q0130', 'YBL099W', 'YBR039W', 'YDL004W', 'YDR298C', 'YDR322C-A', 'YDR377W', 'YJR121W', 'YKL016C', 'YLR295C', 'YML081C-A', 'YPL078C', 'YPL271W'], ['Q0080', 'Q0085', 'Q0130', 'YBL099W', 'YBR039W', 'YDL004W', 'YDR298C', 'YDR377W', 'YJR121W', 'YKL016C', 'YLR295C', 'YML081C-A', 'YPL078C', 'YPL271W', 'YPR020W']]
r_0227	ATPase, cytosolic	ATP [cytoplasm] + H2O [cytoplasm] -> ADP [cytoplasm] + H+ [extracellular] + phosphate [cytoplasm]	(( YCR024C-A and YEL017C-A and YGL008C ) or ( YCR024C-A and YEL017C-A and YPL036W ) or YER005W )	0	Inf	0		10409709		[['YCR024C-A', 'YEL017C-A', 'YGL008C'], ['YCR024C-A', 'YEL017C-A', 'YPL036W'], ['YER005W']]
r_0228	beta-1,4 mannosyltransferase	GDP-alpha-D-mannose [cytoplasm] + N,N'-diacetylchitobiosyldiphosphodolichol [cytoplasm] -> beta-D-mannosyldiacetylchitobiosyldiphosphodolichol [cytoplasm] + GDP [cytoplasm]	YBR110W	0	Inf	0		6368538	R04502	YBR110W
r_0229	biotin synthase	dethiobiotin [cytoplasm] + polysulphur [cytoplasm] <=> biotin [cytoplasm] + 2 H+ [cytoplasm]	YGR286C	-Inf	Inf	0				YGR286C
r_0230	biotin-[acetyl-CoA-carboxylase] ligase	ATP [cytoplasm] + biotin [cytoplasm] + H+ [cytoplasm] -> biotinyl-5'-AMP [cytoplasm] + diphosphate [cytoplasm]	YDL141W	0	Inf	0		9688262	R01074	YDL141W
r_0231	C-14 sterol reductase	4,4-dimethyl-5alpha-cholesta-8,14,24-trien-3beta-ol [cytoplasm] + H+ [cytoplasm] + NADPH [cytoplasm] -> 14-demethyllanosterol [cytoplasm] + NADP(+) [cytoplasm]	YNL280C	0	Inf	0			R05639	YNL280C
r_0233	C-22 sterol desaturase (NADP)	ergosta-5,7,24(28)-trien-3beta-ol [cytoplasm] + H+ [cytoplasm] + NADPH [cytoplasm] + oxygen [cytoplasm] -> ergosta-5,7,22,24(28)-tetraen-3beta-ol [cytoplasm] + 2 H2O [cytoplasm] + NADP(+) [cytoplasm]	YMR015C	0	Inf	0				YMR015C
r_0234	C-3 sterol dehydrogenase	NADP(+) [cytoplasm] + zymosterol intermediate 1c [cytoplasm] -> carbon dioxide [cytoplasm] + H+ [cytoplasm] + NADPH [cytoplasm] + zymosterol intermediate 2 [cytoplasm]	YGL001C	0	Inf	0		22194828		YGL001C
r_0235	C-3 sterol dehydrogenase (4-methylzymosterol)	4beta-methylzymosterol-4alpha-carboxylic acid [cytoplasm] + NAD [cytoplasm] -> 3-dehydro-4-methylzymosterol [cytoplasm] + carbon dioxide [cytoplasm] + H+ [cytoplasm] + NADH [cytoplasm]	YGL001C	0	Inf	0				YGL001C
r_0236	C-3 sterol keto reductase (4-methylzymosterol)	3-dehydro-4-methylzymosterol [cytoplasm] + H+ [cytoplasm] + NADPH [cytoplasm] -> 4alpha-methylzymosterol [cytoplasm] + NADP(+) [cytoplasm]	YLR100W	0	Inf	0			R07495	YLR100W
r_0237	C-3 sterol keto reductase (zymosterol)	H+ [cytoplasm] + NADPH [cytoplasm] + zymosterol intermediate 2 [cytoplasm] -> NADP(+) [cytoplasm] + zymosterol [cytoplasm]	YLR100W	0	Inf	0				YLR100W
r_0238	C-4 methyl sterol oxidase	4alpha-methylzymosterol [cytoplasm] + H+ [cytoplasm] + NADPH [cytoplasm] + oxygen [cytoplasm] -> H2O [cytoplasm] + NADP(+) [cytoplasm] + zymosterol intermediate 1a [cytoplasm]	YGR060W	0	Inf	0				YGR060W
r_0239	C-4 methyl sterol oxidase	H+ [cytoplasm] + NADPH [cytoplasm] + oxygen [cytoplasm] + zymosterol intermediate 1a [cytoplasm] -> 2 H2O [cytoplasm] + NADP(+) [cytoplasm] + zymosterol intermediate 1b [cytoplasm]	YGR060W	0	Inf	0				YGR060W
r_0240	C-4 methyl sterol oxidase	H+ [cytoplasm] + NADPH [cytoplasm] + oxygen [cytoplasm] + zymosterol intermediate 1b [cytoplasm] -> H2O [cytoplasm] + NADP(+) [cytoplasm] + zymosterol intermediate 1c [cytoplasm]	YGR060W	0	Inf	0		22194828		YGR060W
r_0241	C-4 sterol methyl oxidase (4,4-dimethylzymosterol)	14-demethyllanosterol [cytoplasm] + 3 H+ [cytoplasm] + 3 NADPH [cytoplasm] + 3 oxygen [cytoplasm] -> 4beta-methylzymosterol-4alpha-carboxylic acid [cytoplasm] + 4 H2O [cytoplasm] + 3 NADP(+) [cytoplasm]	YGR060W	0	Inf	0			R07509	YGR060W
r_0242	C-5 sterol desaturase	episterol [cytoplasm] + H+ [cytoplasm] + NADPH [cytoplasm] + oxygen [cytoplasm] -> ergosta-5,7,24(28)-trien-3beta-ol [cytoplasm] + 2 H2O [cytoplasm] + NADP(+) [cytoplasm]	YLR056W	0	Inf	0				YLR056W
r_0243	C-8 sterol isomerase	fecosterol [cytoplasm] -> episterol [cytoplasm]	YMR202W	0	Inf	0			R07497	YMR202W
r_0244	C-s24 sterol reductase	ergosta-5,7,22,24(28)-tetraen-3beta-ol [endoplasmic reticulum] + H+ [endoplasmic reticulum] + NADPH [endoplasmic reticulum] -> ergosterol [endoplasmic reticulum] + NADP(+) [endoplasmic reticulum]	YGL012W	0	Inf	0			R05641	YGL012W
r_0249	CAAX farnesyltransferase	4-hydroxybenzoate [cytoplasm] + nonaprenyl diphosphate [cytoplasm] <=> diphosphate [cytoplasm] + 2 H+ [cytoplasm] + nonaprenyl 4-hydroxybenzoate [cytoplasm]	( YDL090C and YKL019W )	-Inf	Inf	0		1763050	R07273	['YDL090C', 'YKL019W']
r_0250	carbamoyl-phosphate synthase (glutamine-hydrolysing)	2 ATP [cytoplasm] + bicarbonate [cytoplasm] + H2O [cytoplasm] + L-glutamine [cytoplasm] -> 2 ADP [cytoplasm] + carbamoyl phosphate [cytoplasm] + 2 H+ [cytoplasm] + L-glutamate [cytoplasm] + phosphate [cytoplasm]	( YJL130C or ( YJR109C and YOR303W ))	0	Inf	0			R00575	[['YJL130C', 'YJR109C', 'YOR303W']]
r_0252	carnitine O-acetyltransferase	(R)-carnitine [cytoplasm] + acetyl-CoA [cytoplasm] -> coenzyme A [cytoplasm] + O-acetylcarnitine [cytoplasm]	( YAR035W or YER024W )	0	Inf	0		11329169		[['YAR035W', 'YER024W']]
r_0253	carnitine O-acetyltransferase	(R)-carnitine [peroxisome] + acetyl-CoA [peroxisome] -> coenzyme A [peroxisome] + O-acetylcarnitine [peroxisome]	YML042W	0	Inf	0				YML042W
r_0254	carnitine O-acetyltransferase	coenzyme A [mitochondrion] + O-acetylcarnitine [mitochondrion] -> (R)-carnitine [mitochondrion] + acetyl-CoA [mitochondrion]	YML042W	0	Inf	0				YML042W
r_0255	catalase	2 hydrogen peroxide [cytoplasm] -> 2 H2O [cytoplasm] + oxygen [cytoplasm]	YGR088W	0	Inf	0		3536508		YGR088W
r_0256	catalase	2 hydrogen peroxide [peroxisome] -> 2 H2O [peroxisome] + oxygen [peroxisome]	YDR256C	0	Inf	0		9931255		YDR256C
r_0259	ceramide-1 hydroxylase (24C)	ceramide-1 (C24) [endoplasmic reticulum] + H+ [endoplasmic reticulum] + NADPH [endoplasmic reticulum] + oxygen [endoplasmic reticulum] -> ceramide-2 (C24) [endoplasmic reticulum] + H2O [endoplasmic reticulum] + NADP(+) [endoplasmic reticulum]	YDR297W	0	Inf	0		18296751; 9368039		YDR297W
r_0260	ceramide-1 hydroxylase (24C)	ceramide-1 (C24) [endoplasmic reticulum] + H+ [endoplasmic reticulum] + NADPH [endoplasmic reticulum] + oxygen [endoplasmic reticulum] -> ceramide-2' (C24) [endoplasmic reticulum] + H2O [endoplasmic reticulum] + NADP(+) [endoplasmic reticulum]	YMR272C	0	Inf	0		18296751; 9368039		YMR272C
r_0261	ceramide-1 hydroxylase (26C)	ceramide-1 (C26) [endoplasmic reticulum] + H+ [endoplasmic reticulum] + NADPH [endoplasmic reticulum] + oxygen [endoplasmic reticulum] -> ceramide-2 (C26) [endoplasmic reticulum] + H2O [endoplasmic reticulum] + NADP(+) [endoplasmic reticulum]	YDR297W	0	Inf	0		18296751; 9368039		YDR297W
r_0262	ceramide-1 hydroxylase (26C)	ceramide-1 (C26) [endoplasmic reticulum] + H+ [endoplasmic reticulum] + NADPH [endoplasmic reticulum] + oxygen [endoplasmic reticulum] -> ceramide-2' (C26) [endoplasmic reticulum] + H2O [endoplasmic reticulum] + NADP(+) [endoplasmic reticulum]	YMR272C	0	Inf	0		18296751; 9368039		YMR272C
r_0263	ceramide-1 synthase (24C)	sphinganine [endoplasmic reticulum] + tetracosanoyl-CoA [endoplasmic reticulum] -> ceramide-1 (C24) [endoplasmic reticulum] + coenzyme A [endoplasmic reticulum] + H+ [endoplasmic reticulum]	(( YHL003C and YMR298W ) or ( YKL008C and YMR298W ))	0	Inf	0		11387200; 15692566; 18296751		[['YHL003C', 'YMR298W'], ['YKL008C', 'YMR298W']]
r_0264	ceramide-1 synthase (26C)	hexacosanoyl-CoA [endoplasmic reticulum] + sphinganine [endoplasmic reticulum] -> ceramide-1 (C26) [endoplasmic reticulum] + coenzyme A [endoplasmic reticulum] + H+ [endoplasmic reticulum]	(( YHL003C and YMR298W ) or ( YKL008C and YMR298W ))	0	Inf	0		11387200; 15692566; 18296751	R06517	[['YHL003C', 'YMR298W'], ['YKL008C', 'YMR298W']]
r_0265	ceramide-2 synthase (24C)	phytosphingosine [endoplasmic reticulum] + tetracosanoyl-CoA [endoplasmic reticulum] -> ceramide-2 (C24) [endoplasmic reticulum] + coenzyme A [endoplasmic reticulum] + H+ [endoplasmic reticulum]	(( YHL003C and YMR298W ) or ( YKL008C and YMR298W ))	0	Inf	0		11387200; 15692566; 18296751		[['YHL003C', 'YMR298W'], ['YKL008C', 'YMR298W']]
r_0266	ceramide-2 synthase (26C)	hexacosanoyl-CoA [endoplasmic reticulum] + phytosphingosine [endoplasmic reticulum] -> ceramide-2 (C26) [endoplasmic reticulum] + coenzyme A [endoplasmic reticulum] + H+ [endoplasmic reticulum]	(( YHL003C and YMR298W ) or ( YKL008C and YMR298W ))	0	Inf	0		11387200; 15692566; 18296751	R06527	[['YHL003C', 'YMR298W'], ['YKL008C', 'YMR298W']]
r_0267	ceramide-3 synthase (24C)	ceramide-2 (C24) [endoplasmic reticulum] + H+ [endoplasmic reticulum] + NADPH [endoplasmic reticulum] + oxygen [endoplasmic reticulum] -> ceramide-3 (C24) [endoplasmic reticulum] + H2O [endoplasmic reticulum] + NADP(+) [endoplasmic reticulum]	YMR272C	0	Inf	0		18296751; 9368039		YMR272C
r_0268	ceramide-3 synthase (26C)	ceramide-2 (C26) [endoplasmic reticulum] + H+ [endoplasmic reticulum] + NADPH [endoplasmic reticulum] + oxygen [endoplasmic reticulum] -> ceramide-3 (C26) [endoplasmic reticulum] + H2O [endoplasmic reticulum] + NADP(+) [endoplasmic reticulum]	YMR272C	0	Inf	0		18296751; 9368039		YMR272C
r_0269	ceramide-4 synthase (24C)	ceramide-3 (C24) [endoplasmic reticulum] + H+ [endoplasmic reticulum] + NADPH [endoplasmic reticulum] + oxygen [endoplasmic reticulum] -> ceramide-4 (C24) [endoplasmic reticulum] + H2O [endoplasmic reticulum] + NADP(+) [endoplasmic reticulum]	YMR272C	0	Inf	0		18296751; 9368039		YMR272C
r_0270	ceramide-4 synthase (26C)	ceramide-3 (C26) [endoplasmic reticulum] + H+ [endoplasmic reticulum] + NADPH [endoplasmic reticulum] + oxygen [endoplasmic reticulum] -> ceramide-4 (C26) [endoplasmic reticulum] + H2O [endoplasmic reticulum] + NADP(+) [endoplasmic reticulum]	YMR272C	0	Inf	0		18296751; 9368039		YMR272C
r_0271	chitin deacetylase	chitin [cytoplasm] + H2O [cytoplasm] -> acetate [cytoplasm] + chitosan [cell envelope] + H+ [cytoplasm]	( YLR307W or YLR308W )	0	Inf	0			R02333	[['YLR307W', 'YLR308W']]
r_0272	chitin synthase	UDP-N-acetyl-alpha-D-glucosamine [cytoplasm] -> chitin [cytoplasm] + H+ [cytoplasm] + UDP [cytoplasm]	( YBR023C or YBR038W or YNL192W )	0	Inf	0		16408321	R02335	[['YBR023C', 'YBR038W', 'YNL192W']]
r_0273	choline kinase	ATP [cytoplasm] + choline [cytoplasm] -> ADP [cytoplasm] + choline phosphate [cytoplasm] + H+ [cytoplasm]	YLR133W	0	Inf	0		10329685	R01021	YLR133W
r_0274	choline phosphate cytididyltransferase	choline phosphate [cytoplasm] + CTP [cytoplasm] + H+ [cytoplasm] -> CDP-choline [cytoplasm] + diphosphate [cytoplasm]	YGR202C	0	Inf	0			R01890	YGR202C
r_0278	chorismate mutase	chorismate [cytoplasm] -> prephenate [cytoplasm]	YPR060C	0	Inf	0		3027508	R01715	YPR060C
r_0279	chorismate synthase	5-O-(1-carboxyvinyl)-3-phosphoshikimic acid [cytoplasm] -> chorismate [cytoplasm] + phosphate [cytoplasm]	YGL148W	0	Inf	0		8971708	R01714	YGL148W
r_0280	cis-aconitate(3-) to isocitrate	cis-aconitate [mitochondrion] + H2O [mitochondrion] <=> isocitrate [mitochondrion]	YLR304C	-Inf	Inf	0		21623372	R01900	YLR304C
r_0281	cis-prenyltransferase step 01	farnesyl diphosphate [lipid particle] + isopentenyl diphosphate [lipid particle] -> diphosphate [lipid particle] + geranylgeranyl diphosphate [lipid particle]	( YBR002C or YMR101C )	0	Inf	0		12702274	R02061	[['YBR002C', 'YMR101C']]
r_0282	cis-prenyltransferase step 02	geranylgeranyl diphosphate [lipid particle] + isopentenyl diphosphate [lipid particle] -> diphosphate [lipid particle] + pentaprenyl diphosphate [lipid particle]	( YBR002C or YMR101C )	0	Inf	0		12702274	R07475	[['YBR002C', 'YMR101C']]
r_0283	cis-prenyltransferase step 03	isopentenyl diphosphate [lipid particle] + pentaprenyl diphosphate [lipid particle] -> diphosphate [lipid particle] + hexaprenyl diphosphate [lipid particle]	( YBR002C or YMR101C )	0	Inf	0		12702274	R05613	[['YBR002C', 'YMR101C']]
r_0284	cis-prenyltransferase step 04	hexaprenyl diphosphate [lipid particle] + isopentenyl diphosphate [lipid particle] -> diphosphate [lipid particle] + heptaprenyl diphosphate [lipid particle]	( YBR002C or YMR101C )	0	Inf	0		12702274	R05612	[['YBR002C', 'YMR101C']]
r_0285	cis-prenyltransferase step 05	heptaprenyl diphosphate [lipid particle] + isopentenyl diphosphate [lipid particle] -> diphosphate [lipid particle] + octaprenyl diphosphate [lipid particle]	( YBR002C or YMR101C )	0	Inf	0		12702274	R05611	[['YBR002C', 'YMR101C']]
r_0286	cis-prenyltransferase step 06	isopentenyl diphosphate [lipid particle] + octaprenyl diphosphate [lipid particle] -> diphosphate [lipid particle] + nonaprenyl diphosphate [lipid particle]	( YBR002C or YMR101C )	0	Inf	0		12702274	R07267	[['YBR002C', 'YMR101C']]
r_0287	cis-prenyltransferase step 07	isopentenyl diphosphate [lipid particle] + nonaprenyl diphosphate [lipid particle] -> decaprenyl diphosphate [lipid particle] + diphosphate [lipid particle]	( YBR002C or YMR101C )	0	Inf	0		12702274	R08747	[['YBR002C', 'YMR101C']]
r_0288	cis-prenyltransferase step 08	decaprenyl diphosphate [lipid particle] + isopentenyl diphosphate [lipid particle] -> diphosphate [lipid particle] + undecaprenyl diphosphate [lipid particle]	( YBR002C or YMR101C )	0	Inf	0		12702274		[['YBR002C', 'YMR101C']]
r_0289	cis-prenyltransferase step 09	isopentenyl diphosphate [lipid particle] + undecaprenyl diphosphate [lipid particle] -> diphosphate [lipid particle] + dodecaprenyl diphosphate [lipid particle]	( YBR002C or YMR101C )	0	Inf	0		12702274		[['YBR002C', 'YMR101C']]
r_0290	cis-prenyltransferase step 10	dodecaprenyl diphosphate [lipid particle] + isopentenyl diphosphate [lipid particle] -> diphosphate [lipid particle] + tridecaprenyl diphosphate [lipid particle]	( YBR002C or YMR101C )	0	Inf	0		12702274		[['YBR002C', 'YMR101C']]
r_0291	cis-prenyltransferase step 11	isopentenyl diphosphate [lipid particle] + tridecaprenyl diphosphate [lipid particle] -> diphosphate [lipid particle] + tetradecaprenyl diphosphate [lipid particle]	( YBR002C or YMR101C )	0	Inf	0		12702274		[['YBR002C', 'YMR101C']]
r_0292	cis-prenyltransferase step 12	isopentenyl diphosphate [lipid particle] + tetradecaprenyl diphosphate [lipid particle] -> diphosphate [lipid particle] + pentadecaprenyl diphosphate [lipid particle]	( YBR002C or YMR101C )	0	Inf	0		12702274		[['YBR002C', 'YMR101C']]
r_0293	cis-prenyltransferase step 13	isopentenyl diphosphate [lipid particle] + pentadecaprenyl diphosphate [lipid particle] -> diphosphate [lipid particle] + hexadecaprenyl diphosphate [lipid particle]	( YBR002C or YMR101C )	0	Inf	0		12702274		[['YBR002C', 'YMR101C']]
r_0294	cis-prenyltransferase step 14	hexadecaprenyl diphosphate [lipid particle] + isopentenyl diphosphate [lipid particle] <=> diphosphate [lipid particle] + heptadecaprenyl diphosphate [lipid particle]	( YBR002C or YMR101C )	-Inf	Inf	0		12702274		[['YBR002C', 'YMR101C']]
r_0295	cis-prenyltransferase step 15	heptadecaprenyl diphosphate [lipid particle] + isopentenyl diphosphate [lipid particle] <=> diphosphate [lipid particle] + octadecaprenyl diphosphate [lipid particle]	( YBR002C or YMR101C )	-Inf	Inf	0		12702274		[['YBR002C', 'YMR101C']]
r_0296	cis-prenyltransferase step 16	isopentenyl diphosphate [lipid particle] + octadecaprenyl diphosphate [lipid particle] -> diphosphate [lipid particle] + nonadecaprenyl diphosphate [lipid particle]	( YBR002C or YMR101C )	0	Inf	0		12702274		[['YBR002C', 'YMR101C']]
r_0297	cis-prenyltransferase step 17	isopentenyl diphosphate [lipid particle] + nonadecaprenyl diphosphate [lipid particle] -> diphosphate [lipid particle] + icosaprenyl diphosphate [lipid particle]	( YBR002C or YMR101C )	0	Inf	0		12702274		[['YBR002C', 'YMR101C']]
r_0298	cis-prenyltransferase step 18	icosaprenyl diphosphate [lipid particle] + isopentenyl diphosphate [lipid particle] -> diphosphate [lipid particle] + henicosaprenyl diphosphate [lipid particle]	( YBR002C or YMR101C )	0	Inf	0		12702274		[['YBR002C', 'YMR101C']]
r_0299	cis-prenyltransferase step 19	henicosaprenyl diphosphate [lipid particle] + isopentenyl diphosphate [lipid particle] -> diphosphate [lipid particle] + docosaprenyl diphosphate [lipid particle]	( YBR002C or YMR101C )	0	Inf	0		12702274		[['YBR002C', 'YMR101C']]
r_0300	citrate synthase	acetyl-CoA [mitochondrion] + H2O [mitochondrion] + oxaloacetate [mitochondrion] -> citrate [mitochondrion] + coenzyme A [mitochondrion] + H+ [mitochondrion]	( YNR001C or YPR001W )	0	Inf	0		9140965		[['YNR001C', 'YPR001W']]
r_0301	citrate synthase, peroxisomal	acetyl-CoA [peroxisome] + H2O [peroxisome] + oxaloacetate [peroxisome] -> citrate [peroxisome] + coenzyme A [peroxisome] + H+ [peroxisome]	YCR005C	0	Inf	0		10587442		YCR005C
r_0302	citrate to cis-aconitate(3-)	citrate [mitochondrion] <=> cis-aconitate [mitochondrion] + H2O [mitochondrion]	YLR304C	-Inf	Inf	0		21623372	R01325	YLR304C
r_0303	citrate to cis-aconitate(3-), cytoplasmic	citrate [cytoplasm] <=> cis-aconitate [cytoplasm] + H2O [cytoplasm]	YLR304C	-Inf	Inf	0		15975908	R01325	YLR304C
r_0304	coproporphyrinogen oxidase (O2 required)	coproporphyrinogen III [cytoplasm] + 2 H+ [cytoplasm] + oxygen [cytoplasm] -> 2 carbon dioxide [cytoplasm] + 2 H2O [cytoplasm] + protoporphyrinogen [cytoplasm]	YDR044W	0	Inf	0			R03220	YDR044W
r_0306	CTP synthase (glutamine)	ATP [cytoplasm] + H2O [cytoplasm] + L-glutamine [cytoplasm] + UTP [cytoplasm] -> ADP [cytoplasm] + CTP [cytoplasm] + 2 H+ [cytoplasm] + L-glutamate [cytoplasm] + phosphate [cytoplasm]	( YBL039C or YJR103W )	0	Inf	0			R00573	[['YBL039C', 'YJR103W']]
r_0307	CTP synthase (NH3)	ammonium [cytoplasm] + ATP [cytoplasm] + UTP [cytoplasm] -> ADP [cytoplasm] + CTP [cytoplasm] + 2 H+ [cytoplasm] + phosphate [cytoplasm]	( YBL039C or YJR103W )	0	Inf	0				[['YBL039C', 'YJR103W']]
r_0308	cystathionine b-lyase	H2O [cytoplasm] + L-cystathionine [cytoplasm] -> ammonium [cytoplasm] + L-homocysteine [cytoplasm] + pyruvate [cytoplasm]	YGL184C	0	Inf	0		10922376		YGL184C
r_0309	cystathionine beta-synthase	L-homocysteine [cytoplasm] + L-serine [cytoplasm] -> H2O [cytoplasm] + L-cystathionine [cytoplasm]	YGR155W	0	Inf	0		10766767	R01290	YGR155W
r_0310	cystathionine g-lyase	H2O [cytoplasm] + L-cystathionine [cytoplasm] -> 2-oxobutanoate [cytoplasm] + ammonium [cytoplasm] + L-cysteine [cytoplasm]	YAL012W	0	Inf	0		1577698		YAL012W
r_0311	cystathionine gamma-synthase	L-cysteine [cytoplasm] + O-acetyl-L-homoserine [cytoplasm] -> acetate [cytoplasm] + H+ [cytoplasm] + L-cystathionine [cytoplasm]	YJR130C	0	Inf	0		10821189	R03217	YJR130C
r_0312	cysteine synthase	hydrogen sulfide [cytoplasm] + O-acetyl-L-serine [cytoplasm] -> acetate [cytoplasm] + H+ [cytoplasm] + L-cysteine [cytoplasm]	YLR303W	0	Inf	0		21623372; 7765825	R00897	YLR303W
r_0313	cysteinyl-tRNA synthetase	ATP [cytoplasm] + L-cysteine [cytoplasm] + tRNA(Cys), cytoplasmic [cytoplasm] -> AMP [cytoplasm] + Cys-tRNA(Cys) [cytoplasm] + diphosphate [cytoplasm]	YNL247W	0	Inf	0		9523015	R03650	YNL247W
r_0314	cytidine deaminase	cytidine [cytoplasm] + H+ [cytoplasm] + H2O [cytoplasm] -> ammonium [cytoplasm] + uridine [cytoplasm]	YLR245C	0	Inf	0				YLR245C
r_0315	cytidine kinase (GTP)	cytidine [cytoplasm] + GTP [cytoplasm] -> CMP [cytoplasm] + GDP [cytoplasm] + H+ [cytoplasm]	YNR012W	0	Inf	0			R00517	YNR012W
r_0317	cytochrome P450 lanosterol 14-alpha-demethylase (NADP)	2 H+ [cytoplasm] + lanosterol [cytoplasm] + 3 NADPH [cytoplasm] + 3 oxygen [cytoplasm] -> 4,4-dimethyl-5alpha-cholesta-8,14,24-trien-3beta-ol [cytoplasm] + formate [cytoplasm] + 4 H2O [cytoplasm] + 3 NADP(+) [cytoplasm]	( YHR007C and YHR042W )	0	Inf	0		10622712	R05640	['YHR007C', 'YHR042W']
r_0318	cytosine deaminase	cytosine [cytoplasm] + H+ [cytoplasm] + H2O [cytoplasm] -> ammonium [cytoplasm] + uracil [cytoplasm]	YPR062W	0	Inf	0				YPR062W
r_0319	D-arabinono-1,4-lactone oxidase	D-arabinono-1,4-lactone [cytoplasm] + oxygen [cytoplasm] <=> dehydro-D-arabinono-1,4-lactone [cytoplasm] + hydrogen peroxide [cytoplasm]	YML086C	-Inf	Inf	0		10508108	R02715	YML086C
r_0320	D-arabinose 1-dehydrogenase (NAD)	D-arabinose [cytoplasm] + NAD [cytoplasm] -> D-arabinono-1,4-lactone [cytoplasm] + H+ [cytoplasm] + NADH [cytoplasm]	YMR041C	0	Inf	0		17097644	R01574	YMR041C
r_0321	D-arabinose 1-dehydrogenase (NADP)	D-arabinose [cytoplasm] + NADP(+) [cytoplasm] -> D-arabinono-1,4-lactone [cytoplasm] + H+ [cytoplasm] + NADPH [cytoplasm]	YBR149W	0	Inf	0			R01575	YBR149W
r_0322	D-fructose 1-phosphate D-glyceraldehyde-3-phosphate-lyase	D-fructose 1-phosphate [cytoplasm] <=> D-glyceraldehyde [cytoplasm] + dihydroxyacetone phosphate [cytoplasm]	YKL060C	-Inf	Inf	0			R02568	YKL060C
r_0323	D-sorbitol dehydrogenase (D-fructose producing)	D-glucitol [cytoplasm] + NAD [cytoplasm] -> D-fructose [cytoplasm] + H+ [cytoplasm] + NADH [cytoplasm]	YJR159W	0	Inf	0			R00875	YJR159W
r_0326	dCMP deaminase	dCMP [cytoplasm] + H+ [cytoplasm] + H2O [cytoplasm] <=> ammonium [cytoplasm] + dUMP [cytoplasm]	YHR144C	-Inf	Inf	0				YHR144C
r_0327	dCTP deaminase	dCTP [cytoplasm] + H+ [cytoplasm] + H2O [cytoplasm] -> ammonium [cytoplasm] + dUTP [cytoplasm]	YHR144C	0	Inf	0				YHR144C
r_0328	deoxyadenosine deaminase	2'-deoxyadenosine [cytoplasm] + H+ [cytoplasm] + H2O [cytoplasm] -> 2'-deoxyinosine [cytoplasm] + ammonium [cytoplasm]	YNL141W	0	Inf	0				YNL141W
r_0329	deoxycytidine deaminase	deoxycytidine [cytoplasm] + H+ [cytoplasm] + H2O [cytoplasm] -> 2'-deoxyuridine [cytoplasm] + ammonium [cytoplasm]	YLR245C	0	Inf	0				YLR245C
r_0330	deoxyguanylate kinase (dGMP:ATP)	ATP [cytoplasm] + dGMP [cytoplasm] <=> ADP [cytoplasm] + dGDP [cytoplasm]	YDR454C	-Inf	Inf	0			R02090	YDR454C
r_0331	deoxyhypusine synthase, cytosolic/mitochondrial	H2O [cytoplasm] + spermidine [cytoplasm] + ubiquinone-6 [mitochondrion] -> 4-aminobutanal [cytoplasm] + trimethylenediamine [cytoplasm] + ubiquinol-6 [mitochondrion]	YHR068W	0	Inf	0				YHR068W
r_0332	deoxyribokinase	2-deoxy-D-ribose [cytoplasm] + ATP [cytoplasm] -> 2-deoxy-D-ribose 5-phosphate [cytoplasm] + ADP [cytoplasm] + H+ [cytoplasm]	YCR036W	0	Inf	0			R02750	YCR036W
r_0334	dephospho-CoA kinase	3'-dephospho-CoA [mitochondrion] + ATP [mitochondrion] -> ADP [mitochondrion] + coenzyme A [mitochondrion] + H+ [mitochondrion]	YDR196C	0	Inf	0			R00130	YDR196C
r_0335	dethiobiotin synthase	7,8-diaminononanoate [cytoplasm] + ATP [cytoplasm] + carbon dioxide [cytoplasm] <=> ADP [cytoplasm] + dethiobiotin [cytoplasm] + 3 H+ [cytoplasm] + phosphate [cytoplasm]	YNR057C	-Inf	Inf	0			R03182	YNR057C
r_0340	dihydroceramidase	lignoceric acid [endoplasmic reticulum] + sphinganine [endoplasmic reticulum] <=> ceramide-1 (C24) [endoplasmic reticulum]	YPL087W	-Inf	Inf	0		10900202; 18296751		YPL087W
r_0341	dihydroceramidase	cerotic acid [endoplasmic reticulum] + sphinganine [endoplasmic reticulum] <=> ceramide-1 (C26) [endoplasmic reticulum]	YPL087W	-Inf	Inf	0		10900202; 18296751		YPL087W
r_0342	dihydroceramidase	ceramide-2 (C24) [endoplasmic reticulum] -> lignoceric acid [endoplasmic reticulum] + phytosphingosine [endoplasmic reticulum]	YPL087W	0	Inf	0		10900202; 18296751		YPL087W
r_0343	dihydroceramidase	ceramide-2 (C26) [endoplasmic reticulum] -> cerotic acid [endoplasmic reticulum] + phytosphingosine [endoplasmic reticulum]	YPL087W	0	Inf	0		10900202; 18296751		YPL087W
r_0344	dihydrofolate reductase	dihydrofolic acid [cytoplasm] + H+ [cytoplasm] + NADPH [cytoplasm] -> NADP(+) [cytoplasm] + THF [cytoplasm]	YOR236W	0	Inf	0			R00939	YOR236W
r_0345	dihydrofolate reductase	dihydrofolic acid [mitochondrion] + H+ [mitochondrion] + NADPH [mitochondrion] -> NADP(+) [mitochondrion] + THF [mitochondrion]	YOR236W	0	Inf	0			R00939	YOR236W
r_0346	dihydrofolate synthase	7,8-dihydropteroate [cytoplasm] + ATP [cytoplasm] + L-glutamate [cytoplasm] -> ADP [cytoplasm] + dihydrofolic acid [cytoplasm] + H+ [cytoplasm] + phosphate [cytoplasm]	YMR113W	0	Inf	0		11731153	R02237	YMR113W
r_0347	dihydroneopterin aldolase	7,8-dihydroneopterin [mitochondrion] -> 2-amino-6-(hydroxymethyl)-7,8-dihydropteridin-4-ol [mitochondrion] + glycolaldehyde [mitochondrion]	YNL256W	0	Inf	0			R03504	YNL256W
r_0348	dihydroneopterin monophosphate dephosphorylase	7,8-dihydroneopterin 3'-phosphate [cytoplasm] + H2O [cytoplasm] -> 7,8-dihydroneopterin [cytoplasm] + phosphate [cytoplasm]	YDL100C	0	Inf	0			R04621	YDL100C
r_0349	dihydroorotase	(S)-dihydroorotate [cytoplasm] + H2O [cytoplasm] <=> H+ [cytoplasm] + N-carbamoyl-L-aspartate [cytoplasm]	YLR420W	-Inf	Inf	0		2897615	R01993	YLR420W
r_0350	dihydropteroate synthase	2-amino-6-(hydroxymethyl)-7,8-dihydropteridin-4-ol [mitochondrion] + 4-aminobenzoate [mitochondrion] -> 7,8-dihydropteroate [mitochondrion] + H2O [mitochondrion]	YNL256W	0	Inf	0			R03066	YNL256W
r_0351	dihydropteroate synthase	(2-amino-4-hydroxy-7,8-dihydropteridin-6-yl)methyl trihydrogen diphosphate [mitochondrion] + 4-aminobenzoate [mitochondrion] -> 7,8-dihydropteroate [mitochondrion] + diphosphate [mitochondrion]	YNL256W	0	Inf	0			R03067	YNL256W
r_0352	dihydroxy-acid dehydratase (2,3-dihydroxy-3-methylbutanoate)	(R)-2,3-dihydroxy-3-methylbutanoate [mitochondrion] -> 3-methyl-2-oxobutanoate [mitochondrion] + H2O [mitochondrion]	YJR016C	0	Inf	0		14576278	R04441	YJR016C
r_0353	dihydroxy-acid dehydratase (2,3-dihydroxy-3-methylpentanoate)	(2R,3R)-2,3-dihydroxy-3-methylpentanoate [mitochondrion] -> (S)-3-methyl-2-oxopentanoate [mitochondrion] + H2O [mitochondrion]	YJR016C	0	Inf	0		14576278	R05070	YJR016C
r_0354	dihydroxyacetone kinase	ATP [cytoplasm] + glycerone [cytoplasm] -> ADP [cytoplasm] + dihydroxyacetone phosphate [cytoplasm] + H+ [cytoplasm]	( YFL053W or YML070W )	0	Inf	0			R01011	[['YFL053W', 'YML070W']]
r_0355	dimethylallyltranstransferase	isopentenyl diphosphate [cytoplasm] + prenyl diphosphate [cytoplasm] -> diphosphate [cytoplasm] + geranyl diphosphate [cytoplasm]	YJL167W	0	Inf	0			R01658	YJL167W
r_0356	diphosphoglyceromutase	1,3-bisphospho-D-glycerate [cytoplasm] <=> 2,3-bisphospho-D-glyceric acid [cytoplasm] + H+ [cytoplasm]	YKL152C	-Inf	Inf	0		6313356	R01662	YKL152C
r_0357	diphosphoinositol-1,3,4,6-tetrakisphosphate diphosphohydrolase	5,6-bis(diphospho)-1D-myo-inositol tetrakisphosphate [cytoplasm] + 3 H2O [cytoplasm] -> 6 H+ [cytoplasm] + myo-inositol 1,3,4,5,6-pentakisphosphate [cytoplasm] + 3 phosphate [cytoplasm]	YOR163W	0	Inf	0		10419486		YOR163W
r_0358	diphosphoinositol-1,3,4,6-tetrakisphosphate synthase	ATP [cytoplasm] + 5 H+ [cytoplasm] + myo-inositol 1,3,4,5,6-pentakisphosphate [cytoplasm] + 2 phosphate [cytoplasm] -> 5,6-bis(diphospho)-1D-myo-inositol tetrakisphosphate [cytoplasm] + ADP [cytoplasm] + 2 H2O [cytoplasm]	YDR017C	0	Inf	0		11956213		YDR017C
r_0359	diphthine synthase	2-(3-amino-3-carboxypropyl)-L-histidine [cytoplasm] + S-adenosyl-L-methionine [cytoplasm] -> 2-[3-carboxy-3-(methylammonio)propyl]-L-histidine [cytoplasm] + H+ [cytoplasm] + S-adenosyl-L-homocysteine [cytoplasm]	YLR172C	0	Inf	0		1508200	R04481	YLR172C
r_0360	dolichol kinase	CTP [cytoplasm] + dolichol [cytoplasm] -> CDP [cytoplasm] + dolichyl phosphate [cytoplasm] + H+ [cytoplasm]	YMR013C	0	Inf	0			R01018	YMR013C
r_0361	dolichyl-phosphate D-mannosyltransferase	dolichyl phosphate [cytoplasm] + GDP-alpha-D-mannose [cytoplasm] -> dolichyl D-mannosyl phosphate [endoplasmic reticulum] + GDP [cytoplasm]	YPR183W	0	Inf	0			R01009	YPR183W
r_0362	dolichyl-phosphate-mannose--protein mannosyltransferase	dolichyl D-mannosyl phosphate [endoplasmic reticulum] -> dolichyl phosphate [endoplasmic reticulum] + H+ [endoplasmic reticulum] + mannan [endoplasmic reticulum]	(( YAL023C and YDL095W ) or YDL093W or YJR143C or YOR321W )	0	Inf	0				[['YAL023C', 'YDL095W'], ['YDL093W'], ['YJR143C'], ['YOR321W']]
r_0363	dTMP kinase	ATP [cytoplasm] + dTMP [cytoplasm] -> ADP [cytoplasm] + dTDP [cytoplasm]	YJR057W	0	Inf	0			R02094	YJR057W
r_0364	dUTP diphosphatase	dUTP [cytoplasm] + H2O [cytoplasm] -> diphosphate [cytoplasm] + dUMP [cytoplasm] + H+ [cytoplasm]	YBR252W	0	Inf	0			R02100	YBR252W
r_0365	endopolygalacturonase	H2O [extracellular] + pectin [extracellular] -> D-galacturonate [extracellular]	YJR153W	0	Inf	0		10028181		YJR153W
r_0366	enolase	2-phospho-D-glyceric acid [cytoplasm] <=> H2O [cytoplasm] + phosphoenolpyruvate [cytoplasm]	( YGR254W or YHR174W )	-Inf	Inf	0		7520111	R00658	[['YGR254W', 'YHR174W']]
r_0368	ethanolamine kinase	ATP [cytoplasm] + ethanolamine [cytoplasm] -> ADP [cytoplasm] + H+ [cytoplasm] + O-phosphoethanolamine [cytoplasm]	( YDR147W or YLR133W )	0	Inf	0		9506987	R01468	[['YDR147W', 'YLR133W']]
r_0369	ethyl acetate-hydrolyzing esterase	ethyl acetate [cytoplasm] + H2O [cytoplasm] -> acetate [cytoplasm] + ethanol [cytoplasm] + H+ [cytoplasm]	YOR126C	0	Inf	0		10855721		YOR126C
r_0370	exo-1,3-beta-glucan glucohydrase	(1->3)-beta-D-glucan [extracellular] + H2O [extracellular] -> D-glucose [extracellular]	( YDR261C or YGR282C or YLR300W or YNR067C or YOR190W )	0	Inf	0		8458852	R00308	[['YDR261C', 'YGR282C', 'YLR300W', 'YNR067C', 'YOR190W']]
r_0373	farnesyltranstransferase	farnesyl diphosphate [cytoplasm] + isopentenyl diphosphate [cytoplasm] -> geranylgeranyl diphosphate [cytoplasm] + diphosphate [cytoplasm]	YPL069C	0	Inf	0		7665600	R02061	YPL069C
r_0399	fatty-acid--CoA ligase (decanoate)	ATP [peroxisome] + coenzyme A [peroxisome] + decanoate [peroxisome] <=> AMP [peroxisome] + decanoyl-CoA [peroxisome] + diphosphate [peroxisome]	YER015W	-Inf	Inf	0				YER015W
r_0400	fatty-acid--CoA ligase (dodecanoate)	ATP [peroxisome] + coenzyme A [peroxisome] + laurate [peroxisome] <=> AMP [peroxisome] + diphosphate [peroxisome] + lauroyl-CoA [peroxisome]	YER015W	-Inf	Inf	0				YER015W
r_0402	fatty-acid--CoA ligase (hexadecanoate)	ATP [peroxisome] + coenzyme A [peroxisome] + palmitate [peroxisome] <=> AMP [peroxisome] + diphosphate [peroxisome] + palmitoyl-CoA [peroxisome]	YER015W	-Inf	Inf	0			R01280	YER015W
r_0410	fatty-acid--CoA ligase (octanoate)	ATP [peroxisome] + coenzyme A [peroxisome] + octanoate [peroxisome] <=> AMP [peroxisome] + diphosphate [peroxisome] + octanoyl-CoA [peroxisome]	YER015W	-Inf	Inf	0				YER015W
r_0412	fatty-acid--CoA ligase (tetradecanoate)	ATP [peroxisome] + coenzyme A [peroxisome] + myristate [peroxisome] <=> AMP [peroxisome] + diphosphate [peroxisome] + myristoyl-CoA [peroxisome]	YER015W	-Inf	Inf	0				YER015W
r_0436	ferrochelatase	iron [mitochondrion] + protoporphyrin [mitochondrion] -> ferroheme b [mitochondrion] + 2 H+ [mitochondrion]	YOR176W	0	Inf	0			R00310	YOR176W
r_0437	ferrocytochrome-c:hydrogen-peroxide oxidoreductase	2 ferrocytochrome c [mitochondrion] + hydrogen peroxide [mitochondrion] -> 2 ferricytochrome c [mitochondrion] + 2 H2O [mitochondrion]	(( YEL039C and YKR066C ) or ( YJR048W and YKR066C ))	0	Inf	0			R00017	[['YEL039C', 'YKR066C'], ['YJR048W', 'YKR066C']]
r_0438	ferrocytochrome-c:oxygen oxidoreductase	4 ferrocytochrome c [mitochondrion] + 8 H+ [mitochondrion] + oxygen [mitochondrion] -> 4 ferricytochrome c [mitochondrion] + 4 H+ [cytoplasm] + 2 H2O [mitochondrion]	(( Q0045 and Q0250 and Q0275 and YDL067C and YEL039C and YGL187C and YGL191W and YHR051W and YIL111W and YLR038C and YLR395C and YMR256C ) or ( Q0045 and Q0250 and Q0275 and YDL067C and YEL039C and YGL187C and YGL191W and YHR051W and YLR038C and YLR395C and YMR256C and YNL052W ) or ( Q0045 and Q0250 and Q0275 and YDL067C and YGL187C and YGL191W and YHR051W and YIL111W and YJR048W and YLR038C and …	0	Inf	0		21964735	R00081	[['Q0045', 'Q0250', 'Q0275', 'YDL067C', 'YEL039C', 'YGL187C', 'YGL191W', 'YHR051W', 'YIL111W', 'YLR038C', 'YLR395C', 'YMR256C'], ['Q0045', 'Q0250', 'Q0275', 'YDL067C', 'YEL039C', 'YGL187C', 'YGL191W', 'YHR051W', 'YLR038C', 'YLR395C', 'YMR256C', 'YNL052W'], ['Q0045', 'Q0250', 'Q0275', 'YDL067C', 'YGL187C', 'YGL191W', 'YHR051W', 'YIL111W', 'YJR048W', 'YLR038C', 'YLR395C', 'YMR256C'], ['Q0045', 'Q02…
r_0439	ubiquinol:ferricytochrome c reductase	2 ferricytochrome c [mitochondrion] + 2 H+ [mitochondrion] + ubiquinol-6 [mitochondrion] -> 2 ferrocytochrome c [mitochondrion] + 4 H+ [cytoplasm] + ubiquinone-6 [mitochondrion]	(( Q0105 and YBL045C and YDR529C and YEL024W and YEL039C and YFR033C and YGR183C and YHR001W-A and YJL166W and YOR065W and YPR191W ) or ( Q0105 and YBL045C and YDR529C and YEL024W and YFR033C and YGR183C and YHR001W-A and YJL166W and YJR048W and YOR065W and YPR191W ))	0	Inf	0				[['Q0105', 'YBL045C', 'YDR529C', 'YEL024W', 'YEL039C', 'YFR033C', 'YGR183C', 'YHR001W-A', 'YJL166W', 'YOR065W', 'YPR191W'], ['Q0105', 'YBL045C', 'YDR529C', 'YEL024W', 'YFR033C', 'YGR183C', 'YHR001W-A', 'YJL166W', 'YJR048W', 'YOR065W', 'YPR191W']]
r_0440	FMN adenylyltransferase	ATP [cytoplasm] + FMN [cytoplasm] + H+ [cytoplasm] -> diphosphate [cytoplasm] + FAD [cytoplasm]	YDL045C	0	Inf	0			R00161	YDL045C
r_0441	FMN reductase	FMN [cytoplasm] + H+ [cytoplasm] + NADH [cytoplasm] -> FMNH2 [cytoplasm] + NAD [cytoplasm]	YLR011W	0	Inf	0		15184374	R05705	YLR011W
r_0442	FMN reductase	FMN [cytoplasm] + H+ [cytoplasm] + NADPH [cytoplasm] -> FMNH2 [cytoplasm] + NADP(+) [cytoplasm]	YLR011W	0	Inf	0		15184374	R05706	YLR011W
r_0443	formaldehyde dehydrogenase	formaldehyde [cytoplasm] + glutathione [cytoplasm] + NAD [cytoplasm] -> H+ [cytoplasm] + NADH [cytoplasm] + S-formylglutathione [cytoplasm]	YDL168W	0	Inf	0				YDL168W
r_0445	formate dehydrogenase	formate [cytoplasm] + NAD [cytoplasm] -> carbon dioxide [cytoplasm] + NADH [cytoplasm]	YOR388C	0	Inf	0			R00519	YOR388C
r_0446	formate-tetrahydrofolate ligase	ATP [cytoplasm] + formate [cytoplasm] + THF [cytoplasm] <=> 10-formyl-THF [cytoplasm] + ADP [cytoplasm] + phosphate [cytoplasm]	YGR204W	-Inf	Inf	0		10871621; 1916088; 8852837	R00943	YGR204W
r_0447	formate-tetrahydrofolate ligase	ATP [mitochondrion] + formate [mitochondrion] + THF [mitochondrion] <=> 10-formyl-THF [mitochondrion] + ADP [mitochondrion] + phosphate [mitochondrion]	YBR084W	-Inf	Inf	0		10871621; 1916088; 8852837	R00943	YBR084W
r_0448	fructose-2,6-bisphosphate 2-phosphatase	beta-D-fructose 2,6-bisphosphate [cytoplasm] + H2O [cytoplasm] -> D-fructose 6-phosphate [cytoplasm] + phosphate [cytoplasm]	YJL155C	0	Inf	0			R00763	YJL155C
r_0449	fructose-bisphosphatase	D-fructose 1,6-bisphosphate [cytoplasm] + H2O [cytoplasm] -> D-fructose 6-phosphate [cytoplasm] + phosphate [cytoplasm]	YLR377C	0	Inf	0			R00762	YLR377C
r_0450	fructose-bisphosphate aldolase	D-fructose 1,6-bisphosphate [cytoplasm] <=> dihydroxyacetone phosphate [cytoplasm] + glyceraldehyde 3-phosphate [cytoplasm]	YKL060C	-Inf	Inf	0		8435847		YKL060C
r_0451	fumarase	fumarate [mitochondrion] + H2O [mitochondrion] <=> (S)-malate [mitochondrion]	YPL262W	-Inf	Inf	0		9627400	R01082	YPL262W
r_0452	fumarase, cytoplasmic	fumarate [cytoplasm] + H2O [cytoplasm] <=> (S)-malate [cytoplasm]	YPL262W	-Inf	Inf	0		11585823; 20231875	R01082	YPL262W
r_0453	dihydoorotic acid dehydrogenase	(S)-dihydroorotate [cytoplasm] + fumarate [cytoplasm] -> orotate [cytoplasm] + succinate [cytoplasm]	YKL216W	0	Inf	0		1409592	R01867	YKL216W
r_0454	fumarate reductase	FADH2 [mitochondrion] + fumarate [mitochondrion] <=> FAD [mitochondrion] + succinate [mitochondrion]	YEL047C	-Inf	Inf	0		22672422; 8946166; 9587404	R00408	YEL047C
r_0455	soluble fumarate reductase	FADH2 [cytoplasm] + fumarate [cytoplasm] <=> FAD [cytoplasm] + succinate [cytoplasm]	YEL047C	-Inf	Inf	0		22672422	R00408	YEL047C
r_0457	g-glutamyltransferase	glutathione [cytoplasm] + L-alanine [cytoplasm] -> L-cysteinylglycine [cytoplasm] + L-gamma-glutamyl-L-alanine [cytoplasm]	YLR299W	0	Inf	0				YLR299W
r_0458	galactokinase	ATP [cytoplasm] + D-galactose [cytoplasm] -> ADP [cytoplasm] + alpha-D-galactose 1-phosphate [cytoplasm] + H+ [cytoplasm]	YBR020W	0	Inf	0			R01092	YBR020W
r_0459	galactose-1-phosphate uridylyltransferase	alpha-D-galactose 1-phosphate [cytoplasm] + H+ [cytoplasm] + UTP [cytoplasm] -> diphosphate [cytoplasm] + UDP-D-galactose [cytoplasm]	YBR018C	0	Inf	0			R00502	YBR018C
r_0460	gamma-glutamylcysteine synthetase	ATP [cytoplasm] + L-cysteine [cytoplasm] + L-glutamate [cytoplasm] -> ADP [cytoplasm] + H+ [cytoplasm] + L-gamma-glutamyl-L-cysteine [cytoplasm] + phosphate [cytoplasm]	YJL101C	0	Inf	0			R00894	YJL101C
r_0461	geranylgeranyltranstransferase	geranylgeranyl diphosphate [cytoplasm] + isopentenyl diphosphate [cytoplasm] -> diphosphate [cytoplasm] + pentaprenyl diphosphate [cytoplasm]		0	Inf	0		15792955	R07475	nan
r_0462	geranyltranstransferase	geranyl diphosphate [cytoplasm] + isopentenyl diphosphate [cytoplasm] -> farnesyl diphosphate [cytoplasm] + diphosphate [cytoplasm]	YJL167W	0	Inf	0			R02003	YJL167W
r_0463	glucan 1,4-alpha-glucosidase	glycogen [cytoplasm] + H2O [cytoplasm] -> D-glucose [cytoplasm]	YPR184W	0	Inf	0		11094287		YPR184W
r_0464	glucan 1,4-alpha-glucosidase, vacuole	glycogen [vacuole] + H2O [vacuole] -> D-glucose [vacuole]	YIL099W	0	Inf	0		11486014		YIL099W
r_0465	glucosamine-6-phosphate deaminase	alpha-D-glucosamine 6-phosphate [cytoplasm] + H2O [cytoplasm] -> ammonium [cytoplasm] + D-fructose 6-phosphate [cytoplasm]		0	Inf	0		369615		nan
r_0466	glucose 6-phosphate dehydrogenase	D-glucose 6-phosphate [cytoplasm] + NADP(+) [cytoplasm] -> 6-O-phosphono-D-glucono-1,5-lactone [cytoplasm] + H+ [cytoplasm] + NADPH [cytoplasm]	YNL241C	0	Inf	0		2269430	R00835	YNL241C
r_0467	glucose-6-phosphate isomerase	D-glucose 6-phosphate [cytoplasm] <=> D-fructose 6-phosphate [cytoplasm]	YBR196C	-Inf	Inf	0		8435847	R00771	YBR196C
r_0468	glutamate 5-kinase	ATP [cytoplasm] + L-glutamate [cytoplasm] -> ADP [cytoplasm] + L-gamma-glutamyl phosphate [cytoplasm]	YDR300C	0	Inf	0			R00239	YDR300C
r_0469	glutamate decarboxylase	H+ [cytoplasm] + L-glutamate [cytoplasm] -> carbon dioxide [cytoplasm] + gamma-aminobutyrate [cytoplasm]	YMR250W	0	Inf	0		11031268	R00261	YMR250W
r_0470	glutamate dehydrogenase (NAD)	H2O [cytoplasm] + L-glutamate [cytoplasm] + NAD [cytoplasm] -> 2-oxoglutarate [cytoplasm] + ammonium [cytoplasm] + H+ [cytoplasm] + NADH [cytoplasm]	YDL215C	0	Inf	0		14554197		YDL215C
r_0471	glutamate dehydrogenase (NADP)	2-oxoglutarate [cytoplasm] + ammonium [cytoplasm] + H+ [cytoplasm] + NADPH [cytoplasm] -> H2O [cytoplasm] + L-glutamate [cytoplasm] + NADP(+) [cytoplasm]	( YAL062W or YOR375C )	0	Inf	0				[['YAL062W', 'YOR375C']]
r_0472	glutamate synthase (NADH2)	2-oxoglutarate [cytoplasm] + H+ [cytoplasm] + L-glutamine [cytoplasm] + NADH [cytoplasm] -> 2 L-glutamate [cytoplasm] + NAD [cytoplasm]	YDL171C	0	Inf	0		9657994	R00093	YDL171C
r_0473	glutamate-5-semialdehyde dehydrogenase	H+ [cytoplasm] + L-gamma-glutamyl phosphate [cytoplasm] + NADPH [cytoplasm] -> L-glutamic 5-semialdehyde [cytoplasm] + NADP(+) [cytoplasm] + phosphate [cytoplasm]	YOR323C	0	Inf	0			R03313	YOR323C
r_0475	glutaminase	H2O [cytoplasm] + L-glutamine [cytoplasm] -> ammonium [cytoplasm] + L-glutamate [cytoplasm]		0	Inf	0		3309138		nan
r_0476	glutamine synthetase	ammonium [cytoplasm] + ATP [cytoplasm] + L-glutamate [cytoplasm] -> ADP [cytoplasm] + H+ [cytoplasm] + L-glutamine [cytoplasm] + phosphate [cytoplasm]	YPR035W	0	Inf	0		9611819		YPR035W
r_0477	glutamine-fructose-6-phosphate transaminase	D-fructose 6-phosphate [cytoplasm] + L-glutamine [cytoplasm] -> alpha-D-glucosamine 6-phosphate [cytoplasm] + L-glutamate [cytoplasm]	YKL104C	0	Inf	0		2656689	R00768	YKL104C
r_0478	glutaminyl-tRNA synthetase	ATP [cytoplasm] + L-glutamine [cytoplasm] + tRNA(Gln), cytoplasmic [cytoplasm] -> AMP [cytoplasm] + diphosphate [cytoplasm] + Gln-tRNA(Gln) [cytoplasm]	YOR168W	0	Inf	0		2991203	R03652	YOR168W
r_0479	glutamyl-tRNA synthetase	ATP [cytoplasm] + L-glutamate [cytoplasm] + tRNA(Glu), cytoplasmic [cytoplasm] -> AMP [cytoplasm] + diphosphate [cytoplasm] + Glu-tRNA(Glu) [cytoplasm]	YGL245W	0	Inf	0			R05578	YGL245W
r_0480	glutamyl-tRNA synthetase	ATP [mitochondrion] + L-glutamate [mitochondrion] + tRNA(Glu), mitchondrial [mitochondrion] -> AMP [mitochondrion] + diphosphate [mitochondrion] + Glu-tRNA(Glu) [mitochondrion]	YOL033W	0	Inf	0		7607232	R05578	YOL033W
r_0481	glutathione oxidoreductase	glutathione disulfide [cytoplasm] + H+ [cytoplasm] + NADPH [cytoplasm] -> 2 glutathione [cytoplasm] + NADP(+) [cytoplasm]	(( YCL035C and YPL091W ) or ( YDR098C and YPL091W ) or ( YDR513W and YPL091W ) or ( YER174C and YPL091W ))	0	Inf	0			R00115	[['YCL035C', 'YPL091W'], ['YDR098C', 'YPL091W'], ['YDR513W', 'YPL091W'], ['YER174C', 'YPL091W']]
r_0482	glutathione oxidoreductase	glutathione disulfide [mitochondrion] + H+ [mitochondrion] + NADPH [mitochondrion] -> 2 glutathione [mitochondrion] + NADP(+) [mitochondrion]	( YPL059W and YPL091W )	0	Inf	0		14672937	R00115	['YPL059W', 'YPL091W']
r_0483	glutathione peridoxase	2 glutathione [cytoplasm] + hydrogen peroxide [cytoplasm] <=> glutathione disulfide [cytoplasm] + 2 H2O [cytoplasm]	( YBR244W or YCL035C or YDR513W or YIR037W or YKL026C )	-Inf	Inf	0			R00274	[['YBR244W', 'YCL035C', 'YDR513W', 'YIR037W', 'YKL026C']]
r_0484	glutathione peroxidase, mitochondria	2 glutathione [mitochondrion] + hydrogen peroxide [mitochondrion] <=> glutathione disulfide [mitochondrion] + 2 H2O [mitochondrion]	YPL059W	-Inf	Inf	0		12138088	R00274	YPL059W
r_0485	glutathione synthetase	ATP [cytoplasm] + L-gamma-glutamyl-L-cysteine [cytoplasm] + L-glycine [cytoplasm] -> ADP [cytoplasm] + glutathione [cytoplasm] + H+ [cytoplasm] + phosphate [cytoplasm]	YOL049W	0	Inf	0			R00497	YOL049W
r_0486	glyceraldehyde-3-phosphate dehydrogenase	glyceraldehyde 3-phosphate [cytoplasm] + NAD [cytoplasm] + phosphate [cytoplasm] <=> 1,3-bisphospho-D-glycerate [cytoplasm] + H+ [cytoplasm] + NADH [cytoplasm]	( YGR192C or YJL052W or YJR009C )	-Inf	Inf	0		3905788		[['YGR192C', 'YJL052W', 'YJR009C']]
r_0487	glycerol dehydrogenase (NADP-dependent)	glycerol [cytoplasm] + NADP(+) [cytoplasm] -> glycerone [cytoplasm] + H+ [cytoplasm] + NADPH [cytoplasm]	YOR120W	0	Inf	0		11113971		YOR120W
r_0488	glycerol kinase	ATP [cytoplasm] + glycerol [cytoplasm] -> ADP [cytoplasm] + glycerol 3-phosphate [cytoplasm] + H+ [cytoplasm]	YHL032C	0	Inf	0			R00847	YHL032C
r_0489	glycerol-3-phosphatase	glycerol 3-phosphate [cytoplasm] + H2O [cytoplasm] -> glycerol [cytoplasm] + phosphate [cytoplasm]	( YER062C or YIL053W )	0	Inf	0			R00841	[['YER062C', 'YIL053W']]
r_0490	glycerol-3-phosphate dehydrogenase (fad)	FAD [mitochondrion] + glycerol 3-phosphate [mitochondrion] -> dihydroxyacetone phosphate [mitochondrion] + FADH2 [mitochondrion]	YIL155C	0	Inf	0			R00848	YIL155C
r_0491	glycerol-3-phosphate dehydrogenase (NAD)	dihydroxyacetone phosphate [cytoplasm] + H+ [cytoplasm] + NADH [cytoplasm] -> glycerol 3-phosphate [cytoplasm] + NAD [cytoplasm]	( YDL022W or YOL059W )	0	Inf	0		8196651	R00842	[['YDL022W', 'YOL059W']]
r_0492	glycerol-3-phosphate dehydrogenase (NAD)	dihydroxyacetone phosphate [mitochondrion] + H+ [mitochondrion] + NADH [mitochondrion] -> glycerol 3-phosphate [mitochondrion] + NAD [mitochondrion]	YOL059W	0	Inf	0			R00842	YOL059W
r_0497	glycerophosphodiester phosphodiesterase (glycerophosphocholine)	H2O [cytoplasm] + sn-glycero-3-phosphocholine [cytoplasm] -> choline [cytoplasm] + glycerol 3-phosphate [cytoplasm] + H+ [cytoplasm]	YPL110C	0	Inf	0		16141200	R01030	YPL110C
r_0499	glycinamide ribotide transformylase	10-formyl-THF [cytoplasm] + 5-phospho-ribosyl-glycineamide [cytoplasm] -> 5'-phosphoribosyl-N-formylglycineamide [cytoplasm] + H+ [cytoplasm] + THF [cytoplasm]	YDR408C	0	Inf	0			R04325	YDR408C
r_0500	glycine C-acetyltransferase	coenzyme A [cytoplasm] + L-2-amino-3-oxobutanoate [cytoplasm] -> acetyl-CoA [cytoplasm] + L-glycine [cytoplasm]		0	Inf	0		3086094	R00371	nan
r_0501	glycine cleavage system	L-glycine [mitochondrion] + NAD [mitochondrion] + THF [mitochondrion] -> 5,10-methylenetetrahydrofolate [mitochondrion] + ammonium [mitochondrion] + carbon dioxide [mitochondrion] + NADH [mitochondrion]	( YAL044C and YDR019C and YFL018C and YMR189W )	0	Inf	0				['YAL044C', 'YDR019C', 'YFL018C', 'YMR189W']
r_0502	glycine hydroxymethyltransferase	L-serine [cytoplasm] + THF [cytoplasm] <=> 5,10-methylenetetrahydrofolate [cytoplasm] + H2O [cytoplasm] + L-glycine [cytoplasm]	YLR058C	-Inf	Inf	0		8852837	R00945	YLR058C
r_0503	glycine hydroxymethyltransferase	L-serine [mitochondrion] + THF [mitochondrion] <=> 5,10-methylenetetrahydrofolate [mitochondrion] + H2O [mitochondrion] + L-glycine [mitochondrion]	YBR263W	-Inf	Inf	0		22672422; 8852837	R00945	YBR263W
r_0504	glycine-cleavage complex (lipoamide)	H+ [mitochondrion] + L-glycine [mitochondrion] + lipoamide [mitochondrion] -> carbon dioxide [mitochondrion] + S(8)-aminomethyldihydrolipoamide [mitochondrion]	( YAL044C and YDR019C and YFL018C and YMR189W )	0	Inf	0				['YAL044C', 'YDR019C', 'YFL018C', 'YMR189W']
r_0505	glycine-cleavage complex (lipoamide)	dihydrolipoamide [mitochondrion] + NAD [mitochondrion] -> H+ [mitochondrion] + lipoamide [mitochondrion] + NADH [mitochondrion]	(( YAL044C and YDR019C and YFL018C and YMR189W ) or ( YDR148C and YFL018C and YIL125W ))	0	Inf	0			R01698	[['YAL044C', 'YDR019C', 'YFL018C', 'YMR189W'], ['YDR148C', 'YFL018C', 'YIL125W']]
r_0506	glycine-cleavage complex (lipoylprotein)	H+ [mitochondrion] + L-glycine [mitochondrion] + lipoylprotein [mitochondrion] -> carbon dioxide [mitochondrion] + S(8)-aminomethyldihydrolipoylprotein [mitochondrion]	( YAL044C and YDR019C and YFL018C and YMR189W )	0	Inf	0			R03425	['YAL044C', 'YDR019C', 'YFL018C', 'YMR189W']
r_0507	glycine-cleavage complex (lipoylprotein)	S(8)-aminomethyldihydrolipoylprotein [mitochondrion] + THF [mitochondrion] -> 5,10-methylenetetrahydrofolate [mitochondrion] + ammonium [mitochondrion] + dihydrolipoylprotein [mitochondrion]	( YAL044C and YDR019C and YFL018C and YMR189W )	0	Inf	0				['YAL044C', 'YDR019C', 'YFL018C', 'YMR189W']
r_0508	glycine-cleavage complex (lipoylprotein)	dihydrolipoylprotein [mitochondrion] + NAD [mitochondrion] -> H+ [mitochondrion] + lipoylprotein [mitochondrion] + NADH [mitochondrion]	( YAL044C and YDR019C and YFL018C and YMR189W )	0	Inf	0			R03815	['YAL044C', 'YDR019C', 'YFL018C', 'YMR189W']
r_0509	glycine-cleavage system (lipoamide)	S(8)-aminomethyldihydrolipoamide [mitochondrion] + THF [mitochondrion] -> 5,10-methylenetetrahydrofolate [mitochondrion] + ammonium [mitochondrion] + dihydrolipoamide [mitochondrion]	( YAL044C and YDR019C and YFL018C and YMR189W )	0	Inf	0				['YAL044C', 'YDR019C', 'YFL018C', 'YMR189W']
r_0510	glycogen (starch) synthase	H2O [cytoplasm] + UDP-D-glucose [cytoplasm] -> glycogen [cytoplasm] + H+ [cytoplasm] + UDP [cytoplasm]	(( YFR015C and YJL137C ) or ( YFR015C and YKR058W ) or ( YJL137C and YLR258W ) or ( YKR058W and YLR258W ))	0	Inf	0		8900126		[['YFR015C', 'YJL137C'], ['YFR015C', 'YKR058W'], ['YJL137C', 'YLR258W'], ['YKR058W', 'YLR258W']]
r_0511	glycogen phosphorylase	glycogen [cytoplasm] + phosphate [cytoplasm] -> D-glucose 1-phosphate [cytoplasm]	YPR160W	0	Inf	0				YPR160W
r_0512	glycyl-tRNA synthetase	ATP [cytoplasm] + L-glycine [cytoplasm] + tRNA(Gly), cytoplasmic [cytoplasm] -> AMP [cytoplasm] + diphosphate [cytoplasm] + Gly-tRNA(Gly) [cytoplasm]	( YBR121C or YPR081C )	0	Inf	0		10874035	R03654	[['YBR121C', 'YPR081C']]
r_0514	GMP synthase	ATP [cytoplasm] + H2O [cytoplasm] + L-glutamine [cytoplasm] + xanthosine-5-phosphate [cytoplasm] -> AMP [cytoplasm] + diphosphate [cytoplasm] + GMP [cytoplasm] + 2 H+ [cytoplasm] + L-glutamate [cytoplasm]	YMR217W	0	Inf	0			R01231	YMR217W
r_0518	GPI-anchor assembly, step 2	6-(N-acetyl-alpha-D-glucosaminyl)-1-phosphatidyl-1D-myo-inositol [endoplasmic reticulum] + H2O [endoplasmic reticulum] <=> 6-(alpha-D-glucosaminyl)-1-phosphatidyl-1D-myo-inositol [endoplasmic reticulum] + acetate [endoplasmic reticulum] + H+ [endoplasmic reticulum]	YMR281W	-Inf	Inf	0		10085243	R03482	YMR281W
r_0519	GPI-anchor assembly, step 5	6-(alpha-D-glucosaminyl)-O-acyl-1-phosphatidyl-1D-myo-inositol [endoplasmic reticulum] + dolichyl D-mannosyl phosphate [endoplasmic reticulum] <=> 6-O-[alpha-D-mannosyl-(1->4)-alpha-D-glucosaminyl]-O-acyl-1-phosphatidyl-1D-myo-inositol [endoplasmic reticulum] + dolichyl phosphate [endoplasmic reticulum]	( YCL052C and YJR013W )	-Inf	Inf	0		11102867		['YCL052C', 'YJR013W']
r_0520	GPI-anchor assembly, step 6	6-O-[alpha-D-mannosyl-(1->4)-alpha-D-glucosaminyl]-O-acyl-1-phosphatidyl-1D-myo-inositol [endoplasmic reticulum] + phosphatidylethanolamine [endoplasmic reticulum] <=> 6-O-{2-O-[(2-aminoethyl)phosphoryl]-alpha-D-mannosyl-(1->4)-alpha-D-glucosaminyl}-O-acyl-1-phosphatidyl-1D-myo-inositol [endoplasmic reticulum]	YKL165C	-Inf	Inf	0		11102867		YKL165C
r_0521	GPI-anchor assembly, step 7	6-O-{2-O-[(2-aminoethyl)phosphoryl]-alpha-D-mannosyl-(1->4)-alpha-D-glucosaminyl}-O-acyl-1-phosphatidyl-1D-myo-inositol [endoplasmic reticulum] + dolichyl D-mannosyl phosphate [endoplasmic reticulum] <=> 6-O-{alpha-D-mannosyl-(1->6)-2-O-[(2-aminoethyl)phosphoryl]-alpha-D-mannosyl-(1->4)-alpha-D-glucosaminyl}-O-acyl-1-phosphatidyl-1D-myo-inositol [endoplasmic reticulum] + dolichyl phosphate [endop…	YBR004C	-Inf	Inf	0		15623507		YBR004C
r_0522	GPI-anchor assembly, step 8	6-O-{alpha-D-mannosyl-(1->6)-2-O-[(2-aminoethyl)phosphoryl]-alpha-D-mannosyl-(1->4)-alpha-D-glucosaminyl}-O-acyl-1-phosphatidyl-1D-myo-inositol [endoplasmic reticulum] + dolichyl D-mannosyl phosphate [endoplasmic reticulum] <=> 6-O-{alpha-D-mannosyl-(1->2)-alpha-D-mannosyl-(1->6)-2-O-[(2-aminoethyl)phosphoryl]-alpha-D-mannosyl-(1->4)-alpha-D-glucosaminyl}-O-acyl-1-phosphatidyl-1D-myo-inositol [en…	YGL142C	-Inf	Inf	0		11102867		YGL142C
r_0523	GPI-anchor assembly, step 9	6-O-{alpha-D-mannosyl-(1->2)-alpha-D-mannosyl-(1->6)-2-O-[(2-aminoethyl)phosphoryl]-alpha-D-mannosyl-(1->4)-alpha-D-glucosaminyl}-O-acyl-1-phosphatidyl-1D-myo-inositol [endoplasmic reticulum] + phosphatidylethanolamine [endoplasmic reticulum] <=> 6-[6-(2-aminoethylphosphoryl)-alpha-mannosyl-(1->6)-2-(2-aminoethylphosphoryl)-alpha-mannosyl-(1->6)-alpha-2-(2-aminoethylphosphoryl)mannosyl-(1->4)-alp…	( YDR302W or YLL031C )	-Inf	Inf	0		10793139		[['YDR302W', 'YLL031C']]
r_0524	GTP cyclohydrolase I	GTP [cytoplasm] + H2O [cytoplasm] -> 7,8-dihydroneopterin 3'-triphosphate [cytoplasm] + formate [cytoplasm] + H+ [cytoplasm]	YGR267C	0	Inf	0			R00424	YGR267C
r_0525	GTP cyclohydrolase II	GTP [cytoplasm] + 3 H2O [cytoplasm] -> 2,5-diamino-4-hydroxy-6-(5-phosphoribosylamino)pyrimidine [cytoplasm] + diphosphate [cytoplasm] + formate [cytoplasm] + 2 H+ [cytoplasm]	YBL033C	0	Inf	0			R00425	YBL033C
r_0526	guanine deaminase	guanine [cytoplasm] + H+ [cytoplasm] + H2O [cytoplasm] -> 9H-xanthine [cytoplasm] + ammonium [cytoplasm]	YDL238C	0	Inf	0		15565584		YDL238C
r_0527	guanine phosphoribosyltransferase	guanine [cytoplasm] + PRPP [cytoplasm] -> diphosphate [cytoplasm] + GMP [cytoplasm]	YDR399W	0	Inf	0			R01229	YDR399W
r_0528	guanylate kinase	ATP [cytoplasm] + GMP [cytoplasm] -> ADP [cytoplasm] + GDP [cytoplasm]	YDR454C	0	Inf	0			R00332	YDR454C
r_0529	guanylate kinase (GMP:dATP)	dATP [cytoplasm] + GMP [cytoplasm] <=> dADP [cytoplasm] + GDP [cytoplasm]	YDR454C	-Inf	Inf	0				YDR454C
r_0530	heme O monooxygenase	heme o [mitochondrion] + NADH [mitochondrion] + oxygen [mitochondrion] -> H2O [mitochondrion] + heme a [mitochondrion] + NAD [mitochondrion]	( YDR376W and YPL252C )	0	Inf	0		11788607		['YDR376W', 'YPL252C']
r_0531	Heme O synthase	farnesyl diphosphate [mitochondrion] + ferroheme b [mitochondrion] + H2O [mitochondrion] -> diphosphate [mitochondrion] + heme o [mitochondrion]	YPL172C	0	Inf	0		11788607	R07411	YPL172C
r_0532	hexaprenyldihydroxybenzoate methyltransferase	2-hexaprenyl-5-hydroxy-6-methoxy-3-methyl-1,4-benzoquinone [mitochondrion] + H+ [mitochondrion] + S-adenosyl-L-methionine [mitochondrion] -> S-adenosyl-L-homocysteine [mitochondrion] + ubiquinol-6 [mitochondrion]	( YDR204W and YGL119W and YGR255C and YLR201C and YML110C and YOL096C and YOR125C )	0	Inf	0				['YDR204W', 'YGL119W', 'YGR255C', 'YLR201C', 'YML110C', 'YOL096C', 'YOR125C']
r_0533	hexokinase (D-fructose:ATP)	ATP [cytoplasm] + D-fructose [cytoplasm] -> ADP [cytoplasm] + D-fructose 6-phosphate [cytoplasm] + H+ [cytoplasm]	( YFR053C or YGL253W )	0	Inf	0			R00760	[['YFR053C', 'YGL253W']]
r_0534	hexokinase (D-glucose:ATP)	ATP [cytoplasm] + D-glucose [cytoplasm] -> ADP [cytoplasm] + D-glucose 6-phosphate [cytoplasm] + H+ [cytoplasm]	( YCL040W or YFR053C or YGL253W )	0	Inf	0		6394965	R00299	[['YCL040W', 'YFR053C', 'YGL253W']]
r_0535	hexokinase (D-mannose:ATP)	ATP [cytoplasm] + D-mannose [cytoplasm] -> ADP [cytoplasm] + D-mannose 6-phosphate [cytoplasm] + H+ [cytoplasm]	( YFR053C or YGL253W )	0	Inf	0			R01326	[['YFR053C', 'YGL253W']]
r_0536	histidinol dehydrogenase	H2O [cytoplasm] + L-histidinol [cytoplasm] + 2 NAD [cytoplasm] -> 3 H+ [cytoplasm] + L-histidine [cytoplasm] + 2 NADH [cytoplasm]	YCL030C	0	Inf	0			R01158	YCL030C
r_0537	histidinol-phosphatase	H2O [cytoplasm] + L-histidinol phosphate [cytoplasm] -> L-histidinol [cytoplasm] + phosphate [cytoplasm]	YFR025C	0	Inf	0			R03013	YFR025C
r_0538	histidinol-phosphate transaminase	3-(imidazol-4-yl)-2-oxopropyl dihydrogen phosphate [cytoplasm] + L-glutamate [cytoplasm] -> 2-oxoglutarate [cytoplasm] + L-histidinol phosphate [cytoplasm]	YIL116W	0	Inf	0			R03243	YIL116W
r_0539	histidyl-tRNA synthetase	ATP [cytoplasm] + L-histidine [cytoplasm] + tRNA(His), cytoplasmic [cytoplasm] -> AMP [cytoplasm] + diphosphate [cytoplasm] + His-tRNA(His) [cytoplasm]	YPR033C	0	Inf	0		1459448	R03655	YPR033C
r_0540	histidyl-tRNA synthetase	ATP [mitochondrion] + L-histidine [mitochondrion] + tRNA(His), mitchondrial [mitochondrion] -> AMP [mitochondrion] + diphosphate [mitochondrion] + His-tRNA(His) [mitochondrion]	YPR033C	0	Inf	0		1459448	R03655	YPR033C
r_0541	hnRNP arginine N-methyltransferase	L-histidine [cytoplasm] + S-adenosyl-L-methionine [cytoplasm] -> H+ [cytoplasm] + N(pros)-methyl-L-histidine [cytoplasm] + S-adenosyl-L-homocysteine [cytoplasm]	YBR034C	0	Inf	0		8647869	R01159	YBR034C
r_0542	homoacontinate hydratase	but-1-ene-1,2,4-tricarboxylic acid [mitochondrion] + H2O [mitochondrion] <=> homoisocitrate [mitochondrion]	YDR234W	-Inf	Inf	0		2507177	R04371	YDR234W
r_0543	homocitrate synthase	2-oxoglutarate [nucleus] + acetyl-CoA [nucleus] + H2O [nucleus] -> coenzyme A [nucleus] + H+ [nucleus] + homocitrate [nucleus]	( YDL131W or YDL182W )	0	Inf	0			R00271	[['YDL131W', 'YDL182W']]
r_0544	homocysteine S-methyltransferase	L-homocysteine [cytoplasm] + S-adenosyl-L-methionine [cytoplasm] -> H+ [cytoplasm] + L-methionine [cytoplasm] + S-adenosyl-L-homocysteine [cytoplasm]	( YLL062C or YPL273W )	0	Inf	0		11013242	R00650	[['YLL062C', 'YPL273W']]
r_0545	homoisocitrate dehydrogenase	homoisocitrate [mitochondrion] + NAD [mitochondrion] -> 2-oxoadipic acid [mitochondrion] + carbon dioxide [mitochondrion] + H+ [mitochondrion] + NADH [mitochondrion]	YIL094C	0	Inf	0		10714900		YIL094C
r_0546	homoserine dehydrogenase (NADH)	H+ [cytoplasm] + L-aspartate 4-semialdehyde [cytoplasm] + NADH [cytoplasm] -> L-homoserine [cytoplasm] + NAD [cytoplasm]	YJR139C	0	Inf	0		8500624; 11341914	R01775	YJR139C
r_0547	homoserine dehydrogenase (NADP)	H+ [cytoplasm] + L-aspartate 4-semialdehyde [cytoplasm] + NADPH [cytoplasm] -> L-homoserine [cytoplasm] + NADP(+) [cytoplasm]	YJR139C	0	Inf	0		8500624	R01775	YJR139C
r_0548	homoserine kinase	ATP [cytoplasm] + L-homoserine [cytoplasm] -> ADP [cytoplasm] + H+ [cytoplasm] + O-phospho-L-homoserine [cytoplasm]	YHR025W	0	Inf	0		8973190	R01771	YHR025W
r_0549	homoserine O-trans-acetylase	acetyl-CoA [cytoplasm] + L-homoserine [cytoplasm] -> coenzyme A [cytoplasm] + O-acetyl-L-homoserine [cytoplasm]	YNL277W	0	Inf	0		16232856	R01776	YNL277W
r_0550	hydrogen peroxide reductase (thioredoxin)	hydrogen peroxide [cytoplasm] + TRX1 [cytoplasm] -> 2 H2O [cytoplasm] + TRX1 disulphide [cytoplasm]	(( YDR453C and YGR209C ) or ( YDR453C and YLR043C ))	0	Inf	0		15210711		[['YDR453C', 'YGR209C'], ['YDR453C', 'YLR043C']]
r_0551	hydrogen peroxide reductase (thioredoxin)	hydrogen peroxide [mitochondrion] + TRX1 [mitochondrion] -> 2 H2O [mitochondrion] + TRX1 disulphide [mitochondrion]	( YBL064C and YCR083W )	0	Inf	0		10821871		['YBL064C', 'YCR083W']
r_0552	hydrogen peroxide reductase (thioredoxin)	hydrogen peroxide [peroxisome] + TRX1 [peroxisome] -> 2 H2O [peroxisome] + TRX1 disulphide [peroxisome]	(( YGR209C and YLR109W ) or ( YLR043C and YLR109W ))	0	Inf	0		14640681		[['YGR209C', 'YLR109W'], ['YLR043C', 'YLR109W']]
r_0553	hydroxyacylglutathione hydrolase	(R)-S-lactoylglutathione [cytoplasm] + H2O [cytoplasm] -> (R)-lactate [cytoplasm] + glutathione [cytoplasm] + H+ [cytoplasm]	YDR272W	0	Inf	0			R01736	YDR272W
r_0554	hydroxyacylglutathione hydrolase	(R)-S-lactoylglutathione [mitochondrion] + H2O [mitochondrion] -> (R)-lactate [mitochondrion] + glutathione [mitochondrion] + H+ [mitochondrion]	YOR040W	0	Inf	0			R01736	YOR040W
r_0555	hydroxybenzoate octaprenyltransferase	4-hydroxybenzoate [mitochondrion] + hexaprenyl diphosphate [mitochondrion] -> 3-hexaprenyl-4-hydroxybenzoic acid [mitochondrion] + diphosphate [mitochondrion]	YNR041C	0	Inf	0			R05616	YNR041C
r_0556	hydroxyethylthiazole kinase	5-(2-hydroxyethyl)-4-methylthiazole [cytoplasm] + ATP [cytoplasm] -> 4-methyl-5-(2-phosphonooxyethyl)thiazole [cytoplasm] + ADP [cytoplasm] + H+ [cytoplasm]	YPL214C	0	Inf	0			R04448	YPL214C
r_0557	hydroxymethylbilane synthase	H2O [cytoplasm] + 4 porphobilinogen [cytoplasm] -> 4 ammonium [cytoplasm] + preuroporphyrinogen [cytoplasm]	YDL205C	0	Inf	0				YDL205C
r_0558	hydroxymethylglutaryl CoA reductase	3-hydroxy-3-methylglutaryl-CoA [cytoplasm] + 2 H+ [cytoplasm] + 2 NADPH [cytoplasm] -> (R)-mevalonate [cytoplasm] + coenzyme A [cytoplasm] + 2 NADP(+) [cytoplasm]	( YLR450W or YML075C )	0	Inf	0			R02082	[['YLR450W', 'YML075C']]
r_0559	hydroxymethylglutaryl CoA synthase	acetoacetyl-CoA [cytoplasm] + acetyl-CoA [cytoplasm] + H2O [cytoplasm] -> 3-hydroxy-3-methylglutaryl-CoA [cytoplasm] + coenzyme A [cytoplasm] + H+ [cytoplasm]	YML126C	0	Inf	0			R01978	YML126C
r_0560	hydroxymethylglutaryl CoA synthase	acetoacetyl-CoA [mitochondrion] + acetyl-CoA [mitochondrion] + H2O [mitochondrion] -> 3-hydroxy-3-methylglutaryl-CoA [mitochondrion] + coenzyme A [mitochondrion] + H+ [mitochondrion]	YML126C	0	Inf	0			R01978	YML126C
r_0561	hydroxymethylpyrimidine kinase (ATP)	4-amino-5-hydroxymethyl-2-methylpyrimidine [cytoplasm] + ATP [cytoplasm] -> 4-amino-2-methyl-5-phosphomethylpyrimidine [cytoplasm] + ADP [cytoplasm] + H+ [cytoplasm]	( YOL055C or YPL258C or YPR121W )	0	Inf	0			R03471	[['YOL055C', 'YPL258C', 'YPR121W']]
r_0562	hypoxanthine phosphoribosyltransferase (Hypoxanthine)	hypoxanthine [cytoplasm] + PRPP [cytoplasm] -> diphosphate [cytoplasm] + IMP [cytoplasm]	YDR399W	0	Inf	0			R01132	YDR399W
r_0563	Imidazole-glycerol-3-phosphate synthase	5-[(5-phospho-1-deoxy-D-ribulos-1-ylamino)methylideneamino]-1-(5-phospho-D-ribosyl)imidazole-4-carboxamide [cytoplasm] + L-glutamine [cytoplasm] -> AICAR [cytoplasm] + D-erythro-1-(imidazol-4-yl)glycerol 3-phosphate [cytoplasm] + H+ [cytoplasm] + L-glutamate [cytoplasm]	YBR248C	0	Inf	0			R04558	YBR248C
r_0564	imidazoleglycerol-phosphate dehydratase	D-erythro-1-(imidazol-4-yl)glycerol 3-phosphate [cytoplasm] -> 3-(imidazol-4-yl)-2-oxopropyl dihydrogen phosphate [cytoplasm] + H2O [cytoplasm]	YOR202W	0	Inf	0			R03457	YOR202W
r_0565	IMP dehydrogenase	H2O [cytoplasm] + IMP [cytoplasm] + NAD [cytoplasm] -> H+ [cytoplasm] + NADH [cytoplasm] + xanthosine-5-phosphate [cytoplasm]	( YHR216W or YLR432W or YML056C )	0	Inf	0		11003640	R01130	[['YHR216W', 'YLR432W', 'YML056C']]
r_0566	indole-3-glycerol-phosphate synthase	1-(2-carboxyphenylamino)-1-deoxy-D-ribulose 5-phosphate [cytoplasm] + H+ [cytoplasm] -> 1-C-(indol-3-yl)glycerol 3-phosphate [cytoplasm] + carbon dioxide [cytoplasm] + H2O [cytoplasm]	YKL211C	0	Inf	0		6323449	R03508	YKL211C
r_0567	indole-3-pyruvate decarboxylase	H+ [cytoplasm] + indole-3-pyruvate [cytoplasm] -> carbon dioxide [cytoplasm] + indol-3-ylacetaldehyde [cytoplasm]	( YGR087C or YLR044C or YLR134W )	0	Inf	0		12902239	R01974	[['YGR087C', 'YLR044C', 'YLR134W']]
r_0568	inorganic diphosphatase	diphosphate [cytoplasm] + H2O [cytoplasm] -> H+ [cytoplasm] + 2 phosphate [cytoplasm]	YBR011C	0	Inf	0		8224193		YBR011C
r_0569	inorganic diphosphatase	diphosphate [mitochondrion] + H2O [mitochondrion] -> H+ [mitochondrion] + 2 phosphate [mitochondrion]	YMR267W	0	Inf	0		1648084		YMR267W
r_0570	inosine monophosphate cyclohydrolase	phosphoribosyl-formamido-carboxamide [cytoplasm] <=> H2O [cytoplasm] + IMP [cytoplasm]	( YLR028C or YMR120C )	-Inf	Inf	0			R01127	[['YLR028C', 'YMR120C']]
r_0571	inositol-1,3,4,5,6-pentakisphosphate 2-kinase	ATP [nucleus] + H+ [nucleus] + myo-inositol 1,3,4,5,6-pentakisphosphate [nucleus] -> ADP [nucleus] + myo-inositol hexakisphosphate [nucleus]	YDR315C	0	Inf	0		10960485	R05202	YDR315C
r_0572	inositol-1,3,4,5-triphosphate 6-kinase, nucleus	1D-myo-inositol 1,3,4,5-tetrakisphosphate [nucleus] + ATP [nucleus] + H+ [nucleus] -> ADP [nucleus] + myo-inositol 1,3,4,5,6-pentakisphosphate [nucleus]	YDR173C	0	Inf	0		11956213		YDR173C
r_0573	inositol-1,4,5,6- tetrakisphosphate 3-kinase, nucleus	1D-myo-inositol 1,4,5,6-tetrakisphosphate [nucleus] + ATP [nucleus] + H+ [nucleus] -> ADP [nucleus] + myo-inositol 1,3,4,5,6-pentakisphosphate [nucleus]	YDR173C	0	Inf	0		11956213	R05801	YDR173C
r_0574	inositol-1,4,5-triphosphate 6-kinase, nucleus	1D-myo-inositol 1,4,5-trisphosphate [nucleus] + ATP [nucleus] + H+ [nucleus] -> 1D-myo-inositol 1,4,5,6-tetrakisphosphate [nucleus] + ADP [nucleus]	YDR173C	0	Inf	0		11956213	R05800	YDR173C
r_0575	inositol-1,4,5-trisphosphate 3-kinase, nucleus	1D-myo-inositol 1,4,5-trisphosphate [nucleus] + ATP [nucleus] + H+ [nucleus] -> 1D-myo-inositol 1,3,4,5-tetrakisphosphate [nucleus] + ADP [nucleus]	YDR173C	0	Inf	0		11956213	R03433	YDR173C
r_0596	IPS phospholipase C	H2O [endoplasmic reticulum] + mannosylinositol phosphorylceramide A (C24) [endoplasmic reticulum] -> ceramide-1 (C24) [endoplasmic reticulum] + mannose-1D-myo-inositol 1-phosphate [endoplasmic reticulum]	YER019W	0	Inf	0		11006294; 18296751		YER019W
r_0597	IPS phospholipase C	H2O [endoplasmic reticulum] + mannosylinositol phosphorylceramide A (C26) [endoplasmic reticulum] -> ceramide-1 (C26) [endoplasmic reticulum] + mannose-1D-myo-inositol 1-phosphate [endoplasmic reticulum]	YER019W	0	Inf	0		11006294; 18296751		YER019W
r_0598	IPS phospholipase C	H2O [endoplasmic reticulum] + mannosylinositol phosphorylceramide B' (C24) [endoplasmic reticulum] -> ceramide-2' (C24) [endoplasmic reticulum] + mannose-1D-myo-inositol 1-phosphate [endoplasmic reticulum]	YER019W	0	Inf	0		11006294; 18296751		YER019W
r_0599	IPS phospholipase C	H2O [endoplasmic reticulum] + mannosylinositol phosphorylceramide B' (C26) [endoplasmic reticulum] -> ceramide-2' (C26) [endoplasmic reticulum] + mannose-1D-myo-inositol 1-phosphate [endoplasmic reticulum]	YER019W	0	Inf	0		11006294; 18296751		YER019W
r_0600	IPS phospholipase C	H2O [endoplasmic reticulum] + mannosylinositol phosphorylceramide B (C24) [endoplasmic reticulum] -> ceramide-2 (C24) [endoplasmic reticulum] + mannose-1D-myo-inositol 1-phosphate [endoplasmic reticulum]	YER019W	0	Inf	0		11006294; 18296751		YER019W
r_0601	IPS phospholipase C	H2O [endoplasmic reticulum] + mannosylinositol phosphorylceramide B (C26) [endoplasmic reticulum] -> ceramide-2 (C26) [endoplasmic reticulum] + mannose-1D-myo-inositol 1-phosphate [endoplasmic reticulum]	YER019W	0	Inf	0		11006294; 18296751		YER019W
r_0602	IPS phospholipase C	H2O [endoplasmic reticulum] + mannosylinositol phosphorylceramide C (C24) [endoplasmic reticulum] -> ceramide-3 (C24) [endoplasmic reticulum] + mannose-1D-myo-inositol 1-phosphate [endoplasmic reticulum]	YER019W	0	Inf	0		11006294; 18296751		YER019W
r_0603	IPS phospholipase C	H2O [endoplasmic reticulum] + mannosylinositol phosphorylceramide C (C26) [endoplasmic reticulum] -> ceramide-3 (C26) [endoplasmic reticulum] + mannose-1D-myo-inositol 1-phosphate [endoplasmic reticulum]	YER019W	0	Inf	0		11006294; 18296751		YER019W
r_0604	IPS phospholipase C	H2O [endoplasmic reticulum] + mannosylinositol phosphorylceramide D (C24) [endoplasmic reticulum] -> ceramide-4 (C24) [endoplasmic reticulum] + mannose-1D-myo-inositol 1-phosphate [endoplasmic reticulum]	YER019W	0	Inf	0		11006294; 18296751		YER019W
r_0605	IPS phospholipase C	H2O [endoplasmic reticulum] + mannosylinositol phosphorylceramide D (C26) [endoplasmic reticulum] -> ceramide-4 (C26) [endoplasmic reticulum] + mannose-1D-myo-inositol 1-phosphate [endoplasmic reticulum]	YER019W	0	Inf	0		11006294; 18296751		YER019W
r_0606	IPS phospholipase C	H2O [endoplasmic reticulum] + inositol phosphomannosylinositol phosphoceramide A (C24) [endoplasmic reticulum] -> ceramide-1 (C24) [endoplasmic reticulum] + mannose-(1D-myo-inositol 1-phosphate)2 [endoplasmic reticulum]	YER019W	0	Inf	0		11006294; 18296751		YER019W
r_0607	IPS phospholipase C	H2O [endoplasmic reticulum] + inositol phosphomannosylinositol phosphoceramide A (C26) [endoplasmic reticulum] -> ceramide-1 (C26) [endoplasmic reticulum] + mannose-(1D-myo-inositol 1-phosphate)2 [endoplasmic reticulum]	YER019W	0	Inf	0		11006294; 18296751		YER019W
r_0608	IPS phospholipase C	H2O [endoplasmic reticulum] + inositol phosphomannosylinositol phosphoceramide B' (C24) [endoplasmic reticulum] -> ceramide-2' (C24) [endoplasmic reticulum] + mannose-(1D-myo-inositol 1-phosphate)2 [endoplasmic reticulum]	YER019W	0	Inf	0		11006294; 18296751		YER019W
r_0609	IPS phospholipase C	H2O [endoplasmic reticulum] + inositol phosphomannosylinositol phosphoceramide B' (C26) [endoplasmic reticulum] -> ceramide-2' (C26) [endoplasmic reticulum] + mannose-(1D-myo-inositol 1-phosphate)2 [endoplasmic reticulum]	YER019W	0	Inf	0		11006294; 18296751		YER019W
r_0610	IPS phospholipase C	H2O [endoplasmic reticulum] + inositol phosphomannosylinositol phosphoceramide B (C24) [endoplasmic reticulum] -> ceramide-2 (C24) [endoplasmic reticulum] + mannose-(1D-myo-inositol 1-phosphate)2 [endoplasmic reticulum]	YER019W	0	Inf	0		11006294; 18296751		YER019W
r_0611	IPS phospholipase C	H2O [endoplasmic reticulum] + inositol phosphomannosylinositol phosphoceramide B (C26) [endoplasmic reticulum] -> ceramide-2 (C26) [endoplasmic reticulum] + mannose-(1D-myo-inositol 1-phosphate)2 [endoplasmic reticulum]	YER019W	0	Inf	0		11006294; 18296751		YER019W
r_0612	IPS phospholipase C	H2O [endoplasmic reticulum] + inositol phosphomannosylinositol phosphoceramide C (C24) [endoplasmic reticulum] -> ceramide-3 (C24) [endoplasmic reticulum] + mannose-(1D-myo-inositol 1-phosphate)2 [endoplasmic reticulum]	YER019W	0	Inf	0		11006294; 18296751		YER019W
r_0613	IPS phospholipase C	H2O [endoplasmic reticulum] + inositol phosphomannosylinositol phosphoceramide C (C26) [endoplasmic reticulum] -> ceramide-3 (C26) [endoplasmic reticulum] + mannose-(1D-myo-inositol 1-phosphate)2 [endoplasmic reticulum]	YER019W	0	Inf	0		11006294; 18296751		YER019W
r_0614	IPS phospholipase C	H2O [endoplasmic reticulum] + inositol phosphomannosylinositol phosphoceramide D (C24) [endoplasmic reticulum] -> ceramide-4 (C24) [endoplasmic reticulum] + mannose-(1D-myo-inositol 1-phosphate)2 [endoplasmic reticulum]	YER019W	0	Inf	0		11006294; 18296751		YER019W
r_0615	IPS phospholipase C	H2O [endoplasmic reticulum] + inositol phosphomannosylinositol phosphoceramide D (C26) [endoplasmic reticulum] -> ceramide-4 (C26) [endoplasmic reticulum] + mannose-(1D-myo-inositol 1-phosphate)2 [endoplasmic reticulum]	YER019W	0	Inf	0		11006294; 18296751		YER019W
r_0616	IPS phospholipase C	H2O [mitochondrion] + inositol-P-ceramide A (C24) [mitochondrion] -> 1D-myo-inositol 3-phosphate [mitochondrion] + ceramide-1 (C24) [mitochondrion]	YER019W	0	Inf	0		17880915; 18296751		YER019W
r_0617	IPS phospholipase C	H2O [mitochondrion] + inositol-P-ceramide A (C26) [mitochondrion] -> 1D-myo-inositol 3-phosphate [mitochondrion] + ceramide-1 (C26) [mitochondrion]	YER019W	0	Inf	0		17880915; 18296751		YER019W
r_0618	IPS phospholipase C	H2O [mitochondrion] + inositol-P-ceramide B' (C24) [mitochondrion] -> 1D-myo-inositol 3-phosphate [mitochondrion] + ceramide-2' (C24) [mitochondrion]	YER019W	0	Inf	0		17880915; 18296751		YER019W
r_0619	IPS phospholipase C	H2O [mitochondrion] + inositol-P-ceramide B' (C26) [mitochondrion] -> 1D-myo-inositol 3-phosphate [mitochondrion] + ceramide-2' (C26) [mitochondrion]	YER019W	0	Inf	0		17880915; 18296751		YER019W
r_0620	IPS phospholipase C	H2O [mitochondrion] + inositol-P-ceramide B (C24) [mitochondrion] -> 1D-myo-inositol 3-phosphate [mitochondrion] + ceramide-2 (C24) [mitochondrion]	YER019W	0	Inf	0		17880915; 18296751		YER019W
r_0621	IPS phospholipase C	H2O [mitochondrion] + inositol-P-ceramide B (C26) [mitochondrion] -> 1D-myo-inositol 3-phosphate [mitochondrion] + ceramide-2 (C26) [mitochondrion]	YER019W	0	Inf	0		17880915; 18296751		YER019W
r_0622	IPS phospholipase C	H2O [mitochondrion] + inositol-P-ceramide C (C24) [mitochondrion] -> 1D-myo-inositol 3-phosphate [mitochondrion] + ceramide-3 (C24) [mitochondrion]	YER019W	0	Inf	0		17880915; 18296751		YER019W
r_0623	IPS phospholipase C	H2O [mitochondrion] + inositol-P-ceramide C (C26) [mitochondrion] -> 1D-myo-inositol 3-phosphate [mitochondrion] + ceramide-3 (C26) [mitochondrion]	YER019W	0	Inf	0		17880915; 18296751		YER019W
r_0624	IPS phospholipase C	H2O [mitochondrion] + inositol-P-ceramide D (C24) [mitochondrion] -> 1D-myo-inositol 3-phosphate [mitochondrion] + ceramide-4 (C24) [mitochondrion]	YER019W	0	Inf	0		17880915; 18296751		YER019W
r_0625	IPS phospholipase C	H2O [mitochondrion] + inositol-P-ceramide D (C26) [mitochondrion] -> 1D-myo-inositol 3-phosphate [mitochondrion] + ceramide-4 (C26) [mitochondrion]	YER019W	0	Inf	0		17880915; 18296751		YER019W
r_0626	IPS phospholipase C	H2O [mitochondrion] + mannosylinositol phosphorylceramide A (C24) [mitochondrion] -> ceramide-1 (C24) [mitochondrion] + mannose-1D-myo-inositol 1-phosphate [mitochondrion]	YER019W	0	Inf	0		17880915; 18296751		YER019W
r_0627	IPS phospholipase C	H2O [mitochondrion] + mannosylinositol phosphorylceramide A (C26) [mitochondrion] -> ceramide-1 (C26) [mitochondrion] + mannose-1D-myo-inositol 1-phosphate [mitochondrion]	YER019W	0	Inf	0		17880915; 18296751		YER019W
r_0628	IPS phospholipase C	H2O [mitochondrion] + mannosylinositol phosphorylceramide B' (C24) [mitochondrion] -> ceramide-2' (C24) [mitochondrion] + mannose-1D-myo-inositol 1-phosphate [mitochondrion]	YER019W	0	Inf	0		17880915; 18296751		YER019W
r_0629	IPS phospholipase C	H2O [mitochondrion] + mannosylinositol phosphorylceramide B' (C26) [mitochondrion] -> ceramide-2' (C26) [mitochondrion] + mannose-1D-myo-inositol 1-phosphate [mitochondrion]	YER019W	0	Inf	0		17880915; 18296751		YER019W
r_0630	IPS phospholipase C	H2O [mitochondrion] + mannosylinositol phosphorylceramide B (C24) [mitochondrion] -> ceramide-2 (C24) [mitochondrion] + mannose-1D-myo-inositol 1-phosphate [mitochondrion]	YER019W	0	Inf	0		17880915; 18296751		YER019W
r_0631	IPS phospholipase C	H2O [mitochondrion] + mannosylinositol phosphorylceramide B (C26) [mitochondrion] -> ceramide-2 (C26) [mitochondrion] + mannose-1D-myo-inositol 1-phosphate [mitochondrion]	YER019W	0	Inf	0		17880915; 18296751		YER019W
r_0632	IPS phospholipase C	H2O [mitochondrion] + mannosylinositol phosphorylceramide C (C24) [mitochondrion] -> ceramide-3 (C24) [mitochondrion] + mannose-1D-myo-inositol 1-phosphate [mitochondrion]	YER019W	0	Inf	0		17880915; 18296751		YER019W
r_0633	IPS phospholipase C	H2O [mitochondrion] + mannosylinositol phosphorylceramide C (C26) [mitochondrion] -> ceramide-3 (C26) [mitochondrion] + mannose-1D-myo-inositol 1-phosphate [mitochondrion]	YER019W	0	Inf	0		17880915; 18296751		YER019W
r_0634	IPS phospholipase C	H2O [mitochondrion] + mannosylinositol phosphorylceramide D (C24) [mitochondrion] -> ceramide-4 (C24) [mitochondrion] + mannose-1D-myo-inositol 1-phosphate [mitochondrion]	YER019W	0	Inf	0		17880915; 18296751		YER019W
r_0635	IPS phospholipase C	H2O [mitochondrion] + mannosylinositol phosphorylceramide D (C26) [mitochondrion] -> ceramide-4 (C26) [mitochondrion] + mannose-1D-myo-inositol 1-phosphate [mitochondrion]	YER019W	0	Inf	0		17880915; 18296751		YER019W
r_0636	IPS phospholipase C	H2O [mitochondrion] + inositol phosphomannosylinositol phosphoceramide A (C24) [mitochondrion] -> ceramide-1 (C24) [mitochondrion] + mannose-(1D-myo-inositol 1-phosphate)2 [mitochondrion]	YER019W	0	Inf	0		17880915; 18296751		YER019W
r_0637	IPS phospholipase C	H2O [mitochondrion] + inositol phosphomannosylinositol phosphoceramide A (C26) [mitochondrion] -> ceramide-1 (C26) [mitochondrion] + mannose-(1D-myo-inositol 1-phosphate)2 [mitochondrion]	YER019W	0	Inf	0		17880915; 18296751		YER019W
r_0638	IPS phospholipase C	H2O [mitochondrion] + inositol phosphomannosylinositol phosphoceramide B' (C24) [mitochondrion] -> ceramide-2' (C24) [mitochondrion] + mannose-(1D-myo-inositol 1-phosphate)2 [mitochondrion]	YER019W	0	Inf	0		17880915; 18296751		YER019W
r_0639	IPS phospholipase C	H2O [mitochondrion] + inositol phosphomannosylinositol phosphoceramide B' (C26) [mitochondrion] -> ceramide-2' (C26) [mitochondrion] + mannose-(1D-myo-inositol 1-phosphate)2 [mitochondrion]	YER019W	0	Inf	0		17880915; 18296751		YER019W
r_0640	IPS phospholipase C	H2O [mitochondrion] + inositol phosphomannosylinositol phosphoceramide B (C24) [mitochondrion] -> ceramide-2 (C24) [mitochondrion] + mannose-(1D-myo-inositol 1-phosphate)2 [mitochondrion]	YER019W	0	Inf	0		17880915; 18296751		YER019W
r_0641	IPS phospholipase C	H2O [mitochondrion] + inositol phosphomannosylinositol phosphoceramide B (C26) [mitochondrion] -> ceramide-2 (C26) [mitochondrion] + mannose-(1D-myo-inositol 1-phosphate)2 [mitochondrion]	YER019W	0	Inf	0		17880915; 18296751		YER019W
r_0642	IPS phospholipase C	H2O [mitochondrion] + inositol phosphomannosylinositol phosphoceramide C (C24) [mitochondrion] -> ceramide-3 (C24) [mitochondrion] + mannose-(1D-myo-inositol 1-phosphate)2 [mitochondrion]	YER019W	0	Inf	0		17880915; 18296751		YER019W
r_0643	IPS phospholipase C	H2O [mitochondrion] + inositol phosphomannosylinositol phosphoceramide C (C26) [mitochondrion] -> ceramide-3 (C26) [mitochondrion] + mannose-(1D-myo-inositol 1-phosphate)2 [mitochondrion]	YER019W	0	Inf	0		17880915; 18296751		YER019W
r_0644	IPS phospholipase C	H2O [mitochondrion] + inositol phosphomannosylinositol phosphoceramide D (C24) [mitochondrion] -> ceramide-4 (C24) [mitochondrion] + mannose-(1D-myo-inositol 1-phosphate)2 [mitochondrion]	YER019W	0	Inf	0		17880915; 18296751		YER019W
r_0645	IPS phospholipase C	H2O [mitochondrion] + inositol phosphomannosylinositol phosphoceramide D (C26) [mitochondrion] -> ceramide-4 (C26) [mitochondrion] + mannose-(1D-myo-inositol 1-phosphate)2 [mitochondrion]	YER019W	0	Inf	0		17880915; 18296751		YER019W
r_0646	IPS phospholipase C	H2O [endoplasmic reticulum] + inositol-P-ceramide A (C24) [endoplasmic reticulum] -> 1D-myo-inositol 1-phosphate [endoplasmic reticulum] + ceramide-1 (C24) [endoplasmic reticulum]	YER019W	0	Inf	0		11006294; 18296751		YER019W
r_0647	IPS phospholipase C	H2O [endoplasmic reticulum] + inositol-P-ceramide A (C26) [endoplasmic reticulum] -> 1D-myo-inositol 1-phosphate [endoplasmic reticulum] + ceramide-1 (C26) [endoplasmic reticulum]	YER019W	0	Inf	0		11006294; 18296751		YER019W
r_0648	IPS phospholipase C	H2O [endoplasmic reticulum] + inositol-P-ceramide B' (C24) [endoplasmic reticulum] -> 1D-myo-inositol 1-phosphate [endoplasmic reticulum] + ceramide-2' (C24) [endoplasmic reticulum]	YER019W	0	Inf	0		11006294; 18296751		YER019W
r_0649	IPS phospholipase C	H2O [endoplasmic reticulum] + inositol-P-ceramide B' (C26) [endoplasmic reticulum] -> 1D-myo-inositol 1-phosphate [endoplasmic reticulum] + ceramide-2' (C26) [endoplasmic reticulum]	YER019W	0	Inf	0		11006294; 18296751		YER019W
r_0650	IPS phospholipase C	H2O [endoplasmic reticulum] + inositol-P-ceramide B (C24) [endoplasmic reticulum] -> 1D-myo-inositol 1-phosphate [endoplasmic reticulum] + ceramide-2 (C24) [endoplasmic reticulum]	YER019W	0	Inf	0		11006294; 18296751		YER019W
r_0651	IPS phospholipase C	H2O [endoplasmic reticulum] + inositol-P-ceramide B (C26) [endoplasmic reticulum] -> 1D-myo-inositol 1-phosphate [endoplasmic reticulum] + ceramide-2 (C26) [endoplasmic reticulum]	YER019W	0	Inf	0		11006294; 18296751		YER019W
r_0652	IPS phospholipase C	H2O [endoplasmic reticulum] + inositol-P-ceramide C (C24) [endoplasmic reticulum] -> 1D-myo-inositol 1-phosphate [endoplasmic reticulum] + ceramide-3 (C24) [endoplasmic reticulum]	YER019W	0	Inf	0		11006294; 18296751		YER019W
r_0653	IPS phospholipase C	H2O [endoplasmic reticulum] + inositol-P-ceramide C (C26) [endoplasmic reticulum] -> 1D-myo-inositol 1-phosphate [endoplasmic reticulum] + ceramide-3 (C26) [endoplasmic reticulum]	YER019W	0	Inf	0		11006294; 18296751		YER019W
r_0654	IPS phospholipase C	H2O [endoplasmic reticulum] + inositol-P-ceramide D (C24) [endoplasmic reticulum] -> 1D-myo-inositol 1-phosphate [endoplasmic reticulum] + ceramide-4 (C24) [endoplasmic reticulum]	YER019W	0	Inf	0		11006294; 18296751		YER019W
r_0655	IPS phospholipase C	H2O [endoplasmic reticulum] + inositol-P-ceramide D (C26) [endoplasmic reticulum] -> 1D-myo-inositol 1-phosphate [endoplasmic reticulum] + ceramide-4 (C26) [endoplasmic reticulum]	YER019W	0	Inf	0		11006294; 18296751		YER019W
r_0656	isoamyl acetate-hydrolyzing esterase	H2O [cytoplasm] + isoamyl acetate [cytoplasm] -> acetate [cytoplasm] + H+ [cytoplasm] + isoamylol [cytoplasm]	YOR126C	0	Inf	0		10855721		YOR126C
r_0657	isobutyl acetate-hydrolyzing esterase	H2O [cytoplasm] + isobutyl acetate [cytoplasm] -> acetate [cytoplasm] + H+ [cytoplasm] + isobutanol [cytoplasm]	YOR126C	0	Inf	0		10855721		YOR126C
r_0658	isocitrate dehydrogenase (NAD+)	isocitrate [mitochondrion] + NAD [mitochondrion] -> 2-oxoglutarate [mitochondrion] + carbon dioxide [mitochondrion] + NADH [mitochondrion]	( YNL037C and YOR136W )	0	Inf	0		1644826	R00709	['YNL037C', 'YOR136W']
r_0659	isocitrate dehydrogenase (NADP)	isocitrate [cytoplasm] + NADP(+) [cytoplasm] <=> 2-oxoglutarate [cytoplasm] + carbon dioxide [cytoplasm] + NADPH [cytoplasm]	YLR174W	-Inf	Inf	0		9175438		YLR174W
r_0661	isocitrate dehydrogenase (NADP+), peroxisomal	isocitrate [peroxisome] + NADP(+) [peroxisome] -> 2-oxoglutarate [peroxisome] + carbon dioxide [peroxisome] + NADPH [peroxisome]	YNL009W	0	Inf	0		9175438	R00267	YNL009W
r_0662	isocitrate lyase	isocitrate [cytoplasm] -> glyoxylate [cytoplasm] + succinate [cytoplasm]	YER065C	0	Inf	0			R00479	YER065C
r_0663	isoleucine transaminase	2-oxoglutarate [cytoplasm] + L-isoleucine [cytoplasm] <=> (S)-3-methyl-2-oxopentanoate [cytoplasm] + L-glutamate [cytoplasm]	YJR148W	-Inf	Inf	0		8798704	R02199	YJR148W
r_0664	isoleucine transaminase	2-oxoglutarate [mitochondrion] + L-isoleucine [mitochondrion] <=> (S)-3-methyl-2-oxopentanoate [mitochondrion] + L-glutamate [mitochondrion]	YHR208W	-Inf	Inf	0		8798704	R02199	YHR208W
r_0665	isoleucyl-tRNA synthetase	ATP [cytoplasm] + L-isoleucine [cytoplasm] + tRNA(Ile), cytoplasmic [cytoplasm] -> AMP [cytoplasm] + diphosphate [cytoplasm] + Ile-tRNA(Ile) [cytoplasm]	YBL076C	0	Inf	0		7619074	R03656	YBL076C
r_0666	isoleucyl-tRNA synthetase	ATP [mitochondrion] + L-isoleucine [mitochondrion] + tRNA(Ile), mitchondrial [mitochondrion] -> AMP [mitochondrion] + diphosphate [mitochondrion] + Ile-tRNA(Ile) [mitochondrion]	YPL040C	0	Inf	0		7607232	R03656	YPL040C
r_0667	isopentenyl-diphosphate D-isomerase	isopentenyl diphosphate [cytoplasm] <=> prenyl diphosphate [cytoplasm]	YPL117C	-Inf	Inf	0			R01123	YPL117C
r_0668	itaconate-CoA ligase (ADP-forming)	ATP [mitochondrion] + coenzyme A [mitochondrion] + itaconate [mitochondrion] <=> ADP [mitochondrion] + itaconyl-CoA [mitochondrion] + phosphate [mitochondrion]	( YGR244C and YOR142W )	-Inf	Inf	0		9874242	R02404	['YGR244C', 'YOR142W']
r_0669	ketol-acid reductoisomerase (2-aceto-2-hydroxybutanoate)	(S)-2-acetyl-2-hydroxybutanoate [mitochondrion] + H+ [mitochondrion] + NADPH [mitochondrion] -> (2R,3R)-2,3-dihydroxy-3-methylpentanoate [mitochondrion] + NADP(+) [mitochondrion]	YLR355C	0	Inf	0		3027658		YLR355C
r_0670	kynureninase	H2O [cytoplasm] + L-kynurenine [cytoplasm] -> anthranilate [cytoplasm] + H+ [cytoplasm] + L-alanine [cytoplasm]	YLR231C	0	Inf	0		12062417	R00987	YLR231C
r_0671	kynurenine 3-monooxygenase	H+ [cytoplasm] + L-kynurenine [cytoplasm] + NADPH [cytoplasm] + oxygen [cytoplasm] -> 3-hydroxy-L-kynurenine [cytoplasm] + H2O [cytoplasm] + NADP(+) [cytoplasm]	YBL098W	0	Inf	0		12062417	R01960	YBL098W
r_0672	L-1-pyrroline-3-hydroxy-5-carboxylate dehydrogenase	1-pyrroline-3-hydroxy-5-carboxylic acid [mitochondrion] + 2 H2O [mitochondrion] + NAD [mitochondrion] <=> erythro-4-hydroxy-L-glutamic acid [mitochondrion] + H+ [mitochondrion] + NADH [mitochondrion]	YHR037W	-Inf	Inf	0			R04444	YHR037W
r_0673	L-4-hydroxyglutamate semialdehyde dehydrogenase	H2O [mitochondrion] + L-4-hydroxyglutamic semialdehyde [mitochondrion] + NAD [mitochondrion] <=> erythro-4-hydroxy-L-glutamic acid [mitochondrion] + 2 H+ [mitochondrion] + NADH [mitochondrion]	YHR037W	-Inf	Inf	0			R05051	YHR037W
r_0674	L-alanine transaminase	2-oxoglutarate [mitochondrion] + L-alanine [mitochondrion] <=> L-glutamate [mitochondrion] + pyruvate [mitochondrion]	YLR089C	-Inf	Inf	0			R00258	YLR089C
r_0675	L-allo-threonine aldolase	L-allothreonine [cytoplasm] -> acetaldehyde [cytoplasm] + L-glycine [cytoplasm]	YEL046C	0	Inf	0		9151955	R06171	YEL046C
r_0676	L-allo-threonine dehydrogenase	L-allothreonine [cytoplasm] + NADP(+) [cytoplasm] <=> H+ [cytoplasm] + L-2-amino-3-oxobutanoate [cytoplasm] + NADPH [cytoplasm]	YMR226C	-Inf	Inf	0		12535615		YMR226C
r_0678	L-aminoadipate-semialdehyde dehydrogenase (NADPH)	ATP [cytoplasm] + H+ [cytoplasm] + L-2-aminoadipate [cytoplasm] + NADPH [cytoplasm] -> AMP [cytoplasm] + diphosphate [cytoplasm] + L-allysine [cytoplasm] + NADP(+) [cytoplasm]	( YBR115C and YGL154C )	0	Inf	0		3928261		['YBR115C', 'YGL154C']
r_0679	L-asparaginase	H2O [cytoplasm] + L-asparagine [cytoplasm] -> ammonium [cytoplasm] + L-aspartate [cytoplasm]	YDR321W	0	Inf	0		8026756		YDR321W
r_0680	L-asparaginase	H2O [extracellular] + L-asparagine [extracellular] -> ammonium [extracellular] + L-aspartate [extracellular]	( YLR155C or YLR157C or YLR158C or YLR160C )	0	Inf	0		3042786		[['YLR155C', 'YLR157C', 'YLR158C', 'YLR160C']]
r_0681	L-erythro-4-hydroxyglutamate:2-oxoglutarate aminotransferase	2-oxoglutarate [cytoplasm] + erythro-4-hydroxy-L-glutamic acid [cytoplasm] -> 4-hydroxy-2-oxoglutarate [cytoplasm] + L-glutamate [cytoplasm]	YLR027C	0	Inf	0				YLR027C
r_0682	L-erythro-4-hydroxyglutamate:2-oxoglutarate aminotransferase	2-oxoglutarate [mitochondrion] + erythro-4-hydroxy-L-glutamic acid [mitochondrion] -> 4-hydroxy-2-oxoglutarate [mitochondrion] + L-glutamate [mitochondrion]	YKL106W	0	Inf	0				YKL106W
r_0683	L-erythro-4-hydroxyglutamate:2-oxoglutarate aminotransferase	2-oxoglutarate [peroxisome] + erythro-4-hydroxy-L-glutamic acid [peroxisome] -> 4-hydroxy-2-oxoglutarate [peroxisome] + L-glutamate [peroxisome]	YLR027C	0	Inf	0				YLR027C
r_0687	L-hydroxyproline reductase (NADP)	1-pyrroline-3-hydroxy-5-carboxylic acid [cytoplasm] + 2 H+ [cytoplasm] + NADPH [cytoplasm] -> L-proline [cytoplasm] + NADP(+) [cytoplasm]	YER023W	0	Inf	0			R03293	YER023W
r_0688	L-lactaldehyde:NADP+ 1-oxidoreductase	H+ [cytoplasm] + methylglyoxal [cytoplasm] + NADPH [cytoplasm] -> (S)-lactaldehyde [cytoplasm] + NADP(+) [cytoplasm]	( YHR104W or YOL151W )	0	Inf	0		12722185	R02260	[['YHR104W', 'YOL151W']]
r_0689	L-serine deaminase	L-serine [cytoplasm] -> ammonium [cytoplasm] + pyruvate [cytoplasm]	YCL064C	0	Inf	0		2194168		YCL064C
r_0690	L-serine dehydrogenase	L-serine [cytoplasm] + NADP(+) [cytoplasm] -> H+ [cytoplasm] + L-alpha-formylglycine [cytoplasm] + NADPH [cytoplasm]	YMR226C	0	Inf	0		12535615	R06126	YMR226C
r_0691	L-sorbitol dehydrogenase (L-sorbose-producing)	L-glucitol [cytoplasm] + NAD [cytoplasm] -> H+ [cytoplasm] + L-sorbose [cytoplasm] + NADH [cytoplasm]	YJR159W	0	Inf	0				YJR159W
r_0692	L-threonine deaminase	L-threonine [cytoplasm] -> 2-oxobutanoate [cytoplasm] + ammonium [cytoplasm]	YCL064C	0	Inf	0		1628804		YCL064C
r_0693	L-threonine deaminase	L-threonine [mitochondrion] -> 2-oxobutanoate [mitochondrion] + ammonium [mitochondrion]	YER086W	0	Inf	0		3289762		YER086W
r_0694	L-tryptophan:oxygen 2,3-oxidoreductase (decyclizing)	L-tryptophan [cytoplasm] + oxygen [cytoplasm] -> N-formyl-L-kynurenine [cytoplasm]	YJR078W	0	Inf	0		12062417	R00678	YJR078W
r_0695	L-tyrosine N-formyltransferase	10-formyl-THF [cytoplasm] + L-tyrosine [cytoplasm] -> H+ [cytoplasm] + N-formyl-L-tyrosine [cytoplasm] + THF [cytoplasm]	YDR403W	0	Inf	0		8706696		YDR403W
r_0696	lactaldehyde dehydrogenase	(S)-lactaldehyde [cytoplasm] + H2O [cytoplasm] + NAD [cytoplasm] -> (S)-lactate [cytoplasm] + 2 H+ [cytoplasm] + NADH [cytoplasm]		0	Inf	0		3908097	R01446	nan
r_0697	lactoylglutathione lyase	glutathione [cytoplasm] + methylglyoxal [cytoplasm] -> (R)-S-lactoylglutathione [cytoplasm]	YML004C	0	Inf	0			R02530	YML004C
r_0698	lanosterol synthase	(S)-2,3-epoxysqualene [cytoplasm] -> lanosterol [cytoplasm]	YHR072W	0	Inf	0			R03199	YHR072W
r_0699	leucine transaminase	2-oxoglutarate [cytoplasm] + L-leucine [cytoplasm] <=> 4-methyl-2-oxopentanoate [cytoplasm] + L-glutamate [cytoplasm]	YJR148W	-Inf	Inf	0		9748245	R01090	YJR148W
r_0700	leucine transaminase	2-oxoglutarate [mitochondrion] + L-leucine [mitochondrion] <=> 4-methyl-2-oxopentanoate [mitochondrion] + L-glutamate [mitochondrion]	YHR208W	-Inf	Inf	0		8798704	R01090	YHR208W
r_0701	leucyl-tRNA synthetase	ATP [cytoplasm] + L-leucine [cytoplasm] + tRNA(Leu), cytoplasmic [cytoplasm] -> AMP [cytoplasm] + diphosphate [cytoplasm] + Leu-tRNA(Leu) [cytoplasm]	YPL160W	0	Inf	0		9742237	R03657	YPL160W
r_0702	leucyl-tRNA synthetase	ATP [mitochondrion] + L-leucine [mitochondrion] + tRNA(Leu), mitchondrial [mitochondrion] -> AMP [mitochondrion] + diphosphate [mitochondrion] + Leu-tRNA(Leu) [mitochondrion]	YLR382C	0	Inf	0		1990003	R03657	YLR382C
r_0703	leukotriene A4 hydrolase	H2O [cytoplasm] + leukotriene A4 [cytoplasm] <=> (5S,6S)-di-HETE [cytoplasm]	YNL045W	-Inf	Inf	0		11601994		YNL045W
r_0704	leukotriene A4 hydrolase	H2O [nucleus] + leukotriene A4 [nucleus] <=> (5S,6S)-di-HETE [nucleus]	YNL045W	-Inf	Inf	0		11601994		YNL045W
r_0705	leukotriene A4 hydrolase	H2O [cytoplasm] + leukotriene A4 [cytoplasm] <=> Delta(6)-trans,Delta(8)-cis-leukotriene B4 [cytoplasm]	YNL045W	-Inf	Inf	0		11601994		YNL045W
r_0706	leukotriene A4 hydrolase	H2O [nucleus] + leukotriene A4 [nucleus] <=> Delta(6)-trans,Delta(8)-cis-leukotriene B4 [nucleus]	YNL045W	-Inf	Inf	0		11601994		YNL045W
r_0707	leukotriene A4 hydrolase	H2O [cytoplasm] + leukotriene A4 [cytoplasm] <=> leukotriene B4 [cytoplasm]	YNL045W	-Inf	Inf	0		11601994	R03057	YNL045W
r_0708	leukotriene A4 hydrolase	H2O [nucleus] + leukotriene A4 [nucleus] <=> leukotriene B4 [nucleus]	YNL045W	-Inf	Inf	0		11601994	R03057	YNL045W
r_0711	lysyl-tRNA synthetase	ATP [cytoplasm] + L-lysine [cytoplasm] + tRNA(Lys), cytoplasmic [cytoplasm] -> AMP [cytoplasm] + diphosphate [cytoplasm] + Lys-tRNA(Lys) [cytoplasm]	YDR037W	0	Inf	0		2903861	R03658	YDR037W
r_0712	lysyl-tRNA synthetase	ATP [mitochondrion] + L-lysine [mitochondrion] + tRNA(Lys), mitchondrial [mitochondrion] -> AMP [mitochondrion] + diphosphate [mitochondrion] + Lys-tRNA(Lys) [mitochondrion]	YNL073W	0	Inf	0		2016746	R03658	YNL073W
r_0713	malate dehydrogenase	(S)-malate [mitochondrion] + NAD [mitochondrion] <=> H+ [mitochondrion] + NADH [mitochondrion] + oxaloacetate [mitochondrion]	YKL085W	-Inf	Inf	0		9175438	R00342	YKL085W
r_0714	malate dehydrogenase, cytoplasmic	(S)-malate [cytoplasm] + NAD [cytoplasm] <=> H+ [cytoplasm] + NADH [cytoplasm] + oxaloacetate [cytoplasm]	YOL126C	-Inf	Inf	0		11914276	R00342	YOL126C
r_0715	malate dehydrogenase, peroxisomal	(S)-malate [peroxisome] + NAD [peroxisome] <=> H+ [peroxisome] + NADH [peroxisome] + oxaloacetate [peroxisome]	YDL078C	-Inf	Inf	0		9175438	R00342	YDL078C
r_0716	malate synthase	acetyl-CoA [cytoplasm] + glyoxylate [cytoplasm] + H2O [cytoplasm] -> (S)-malate [cytoplasm] + coenzyme A [cytoplasm] + H+ [cytoplasm]	( YIR031C or YNL117W )	0	Inf	0			R00472	[['YIR031C', 'YNL117W']]
r_0717	malate synthase	acetyl-CoA [peroxisome] + glyoxylate [peroxisome] + H2O [peroxisome] -> (S)-malate [peroxisome] + coenzyme A [peroxisome] + H+ [peroxisome]	YNL117W	0	Inf	0		11846793	R00472	YNL117W
r_0718	malic enzyme (NAD)	(S)-malate [mitochondrion] + NAD [mitochondrion] -> carbon dioxide [mitochondrion] + NADH [mitochondrion] + pyruvate [mitochondrion]	YKL029C	0	Inf	0		9603875; 15491864; 22851014	R00214	YKL029C
r_0719	malic enzyme (NADP)	(S)-malate [mitochondrion] + NADP(+) [mitochondrion] -> carbon dioxide [mitochondrion] + NADPH [mitochondrion] + pyruvate [mitochondrion]	YKL029C	0	Inf	0		9603875; 15491864; 22851014	R00214	YKL029C
r_0721	malonyl-CoA-ACP transacylase	malonyl-CoA [mitochondrion] + ACP1 [mitochondrion] <=> carboxyacetyl-ACP [mitochondrion] + coenzyme A [mitochondrion]	( YKL192C and YOR221C )	-Inf	Inf	0		15387819	R01626	['YKL192C', 'YOR221C']
r_0722	mannose-1-phosphate guanylyltransferase	D-mannose 1-phosphate [cytoplasm] + GTP [cytoplasm] + H+ [cytoplasm] -> diphosphate [cytoplasm] + GDP-alpha-D-mannose [cytoplasm]	YDL055C	0	Inf	0			R00885	YDL055C
r_0723	mannose-6-phosphate isomerase	D-mannose 6-phosphate [cytoplasm] <=> D-fructose 6-phosphate [cytoplasm]	YER003C	-Inf	Inf	0			R00772	YER003C
r_0724	methenyltetrahydrifikate cyclohydrolase	5,10-methenyl-THF [mitochondrion] + H2O [mitochondrion] <=> 10-formyl-THF [mitochondrion] + H+ [mitochondrion]	YBR084W	-Inf	Inf	0			R01655	YBR084W
r_0725	methenyltetrahydrofolate cyclohydrolase	5,10-methenyl-THF [cytoplasm] + H2O [cytoplasm] <=> 10-formyl-THF [cytoplasm] + H+ [cytoplasm]	YGR204W	-Inf	Inf	0			R01655	YGR204W
r_0726	methionine adenosyltransferase	ATP [cytoplasm] + H2O [cytoplasm] + L-methionine [cytoplasm] -> diphosphate [cytoplasm] + phosphate [cytoplasm] + S-adenosyl-L-methionine [cytoplasm]	( YDR502C or YLR180W )	0	Inf	0		194884	R00177	[['YDR502C', 'YLR180W']]
r_0727	methionine synthase	5-methyltetrahydrofolate [cytoplasm] + L-homocysteine [cytoplasm] -> H+ [cytoplasm] + L-methionine [cytoplasm] + THF [cytoplasm]	YER091C	0	Inf	0		16083849	R00946	YER091C
r_0728	methionyl-tRNA formyltransferase	10-formyl-THF [mitochondrion] + Met-tRNA(Met) [mitochondrion] -> fMet-tRNA(fMet) [mitochondrion] + H+ [mitochondrion] + THF [mitochondrion]	YBL013W	0	Inf	0			R03940	YBL013W
r_0729	methionyl-tRNA synthetase	ATP [cytoplasm] + L-methionine [cytoplasm] + tRNA(Met), cytoplasmic [cytoplasm] -> AMP [cytoplasm] + diphosphate [cytoplasm] + Met-tRNA(Met) [cytoplasm]	YGR264C	0	Inf	0		6304034	R03659	YGR264C
r_0730	methionyl-tRNA synthetase	ATP [mitochondrion] + L-methionine [mitochondrion] + tRNA(Met), mitchondrial [mitochondrion] -> AMP [mitochondrion] + diphosphate [mitochondrion] + Met-tRNA(Met) [mitochondrion]	YGR171C	0	Inf	0		2645139	R03659	YGR171C
r_0731	methylenetetrahydrofolate dehydrogenase (NAD)	5,10-methylenetetrahydrofolate [cytoplasm] + NAD [cytoplasm] -> 5,10-methenyl-THF [cytoplasm] + NADH [cytoplasm]	YKR080W	0	Inf	0			R01218	YKR080W
r_0732	methylenetetrahydrofolate dehydrogenase (NADP)	5,10-methylenetetrahydrofolate [cytoplasm] + NADP(+) [cytoplasm] <=> 5,10-methenyl-THF [cytoplasm] + NADPH [cytoplasm]	YGR204W	-Inf	Inf	0			R01220	YGR204W
r_0733	methylenetetrahydrofolate dehydrogenase (NADP)	5,10-methylenetetrahydrofolate [mitochondrion] + NADP(+) [mitochondrion] <=> 5,10-methenyl-THF [mitochondrion] + NADPH [mitochondrion]	YBR084W	-Inf	Inf	0		10871621; 1916088; 8852837	R01220	YBR084W
r_0734	methylisocitrate lyase	(2S,3R)-3-hydroxybutane-1,2,3-tricarboxylic acid [mitochondrion] -> pyruvate [mitochondrion] + succinate [mitochondrion]	YPR006C	0	Inf	0		16332871	R00409	YPR006C
r_0735	mevalonate kinase (atp)	(R)-mevalonate [cytoplasm] + ATP [cytoplasm] -> (R)-5-phosphomevalonic acid [cytoplasm] + ADP [cytoplasm] + H+ [cytoplasm]	YMR208W	0	Inf	0			R02245	YMR208W
r_0736	mevalonate kinase (ctp)	(R)-mevalonate [cytoplasm] + CTP [cytoplasm] -> (R)-5-phosphomevalonic acid [cytoplasm] + CDP [cytoplasm] + H+ [cytoplasm]	YMR208W	0	Inf	0				YMR208W
r_0737	mevalonate kinase (gtp)	(R)-mevalonate [cytoplasm] + GTP [cytoplasm] -> (R)-5-phosphomevalonic acid [cytoplasm] + GDP [cytoplasm] + H+ [cytoplasm]	YMR208W	0	Inf	0				YMR208W
r_0738	mevalonate kinase (UTP)	(R)-mevalonate [cytoplasm] + UTP [cytoplasm] -> (R)-5-phosphomevalonic acid [cytoplasm] + H+ [cytoplasm] + UDP [cytoplasm]	YMR208W	0	Inf	0				YMR208W
r_0739	mevalonate pyrophoshate decarboxylase	(R)-5-diphosphomevalonic acid [cytoplasm] + ATP [cytoplasm] -> ADP [cytoplasm] + carbon dioxide [cytoplasm] + isopentenyl diphosphate [cytoplasm] + phosphate [cytoplasm]	YNR043W	0	Inf	0			R01121	YNR043W
r_0747	MIPC synthase	GDP-alpha-D-mannose [Golgi] + inositol-P-ceramide A (C24) [Golgi] -> GDP [Golgi] + mannosylinositol phosphorylceramide A (C24) [Golgi]	(( YBR036C and YBR161W ) or ( YBR036C and YPL057C ))	0	Inf	0		12954640; 18296751		[['YBR036C', 'YBR161W'], ['YBR036C', 'YPL057C']]
r_0748	MIPC synthase	GDP-alpha-D-mannose [Golgi] + inositol-P-ceramide A (C26) [Golgi] -> GDP [Golgi] + mannosylinositol phosphorylceramide A (C26) [Golgi]	(( YBR036C and YBR161W ) or ( YBR036C and YPL057C ))	0	Inf	0		12954640; 18296751		[['YBR036C', 'YBR161W'], ['YBR036C', 'YPL057C']]
r_0749	MIPC synthase	GDP-alpha-D-mannose [Golgi] + inositol-P-ceramide B' (C24) [Golgi] -> GDP [Golgi] + mannosylinositol phosphorylceramide B' (C24) [Golgi]	(( YBR036C and YBR161W ) or ( YBR036C and YPL057C ))	0	Inf	0		12954640; 18296751		[['YBR036C', 'YBR161W'], ['YBR036C', 'YPL057C']]
r_0750	MIPC synthase	GDP-alpha-D-mannose [Golgi] + inositol-P-ceramide B' (C26) [Golgi] -> GDP [Golgi] + mannosylinositol phosphorylceramide B' (C26) [Golgi]	(( YBR036C and YBR161W ) or ( YBR036C and YPL057C ))	0	Inf	0		12954640; 18296751		[['YBR036C', 'YBR161W'], ['YBR036C', 'YPL057C']]
r_0751	MIPC synthase	GDP-alpha-D-mannose [Golgi] + inositol-P-ceramide B (C24) [Golgi] -> GDP [Golgi] + mannosylinositol phosphorylceramide B (C24) [Golgi]	(( YBR036C and YBR161W ) or ( YBR036C and YPL057C ))	0	Inf	0		12954640; 18296751		[['YBR036C', 'YBR161W'], ['YBR036C', 'YPL057C']]
r_0752	MIPC synthase	GDP-alpha-D-mannose [Golgi] + inositol-P-ceramide B (C26) [Golgi] -> GDP [Golgi] + mannosylinositol phosphorylceramide B (C26) [Golgi]	(( YBR036C and YBR161W ) or ( YBR036C and YPL057C ))	0	Inf	0		12954640; 18296751		[['YBR036C', 'YBR161W'], ['YBR036C', 'YPL057C']]
r_0753	MIPC synthase	GDP-alpha-D-mannose [Golgi] + inositol-P-ceramide C (C24) [Golgi] -> GDP [Golgi] + mannosylinositol phosphorylceramide C (C24) [Golgi]	(( YBR036C and YBR161W ) or ( YBR036C and YPL057C ))	0	Inf	0		12954640; 18296751		[['YBR036C', 'YBR161W'], ['YBR036C', 'YPL057C']]
r_0754	MIPC synthase	GDP-alpha-D-mannose [Golgi] + inositol-P-ceramide C (C26) [Golgi] -> GDP [Golgi] + mannosylinositol phosphorylceramide C (C26) [Golgi]	(( YBR036C and YBR161W ) or ( YBR036C and YPL057C ))	0	Inf	0		12954640; 18296751		[['YBR036C', 'YBR161W'], ['YBR036C', 'YPL057C']]
r_0755	MIPC synthase	GDP-alpha-D-mannose [Golgi] + inositol-P-ceramide D (C24) [Golgi] -> GDP [Golgi] + mannosylinositol phosphorylceramide D (C24) [Golgi]	(( YBR036C and YBR161W ) or ( YBR036C and YPL057C ))	0	Inf	0		12954640; 18296751		[['YBR036C', 'YBR161W'], ['YBR036C', 'YPL057C']]
r_0756	MIPC synthase	GDP-alpha-D-mannose [Golgi] + inositol-P-ceramide D (C26) [Golgi] -> GDP [Golgi] + mannosylinositol phosphorylceramide D (C26) [Golgi]	(( YBR036C and YBR161W ) or ( YBR036C and YPL057C ))	0	Inf	0		12954640; 18296751		[['YBR036C', 'YBR161W'], ['YBR036C', 'YPL057C']]
r_0757	myo-inositol 1-phosphatase	1D-myo-inositol 1-phosphate [cytoplasm] + H2O [cytoplasm] -> myo-inositol [cytoplasm] + phosphate [cytoplasm]	( YDR287W or YHR046C )	0	Inf	0		10844654	R01185	[['YDR287W', 'YHR046C']]
r_0758	myo-inositol-1-phosphate synthase	D-glucose 6-phosphate [cytoplasm] -> 1D-myo-inositol 1-phosphate [cytoplasm]	YJL153C	0	Inf	0				YJL153C
r_0759	N-acetyl-g-glutamyl-phosphate reductase	H+ [mitochondrion] + N-acetyl-L-gamma-glutamyl phosphate [mitochondrion] + NADPH [mitochondrion] -> 2-acetamido-5-oxopentanoate [mitochondrion] + NADP(+) [mitochondrion] + phosphate [mitochondrion]	YER069W	0	Inf	0			R03443	YER069W
r_0760	N-acetylglucosamine-6-phosphate synthase	acetyl-CoA [cytoplasm] + alpha-D-glucosamine 6-phosphate [cytoplasm] <=> coenzyme A [cytoplasm] + H+ [cytoplasm] + N-acetyl-D-glucosamine 6-phosphate [cytoplasm]	YFL017C	-Inf	Inf	0		9867860	R02058	YFL017C
r_0761	N-acteylglutamate synthase	acetyl-CoA [mitochondrion] + L-glutamate [mitochondrion] -> coenzyme A [mitochondrion] + H+ [mitochondrion] + N-acetyl-L-glutamate [mitochondrion]	( YJL071W or YMR062C )	0	Inf	0			R00259	[['YJL071W', 'YMR062C']]
r_0762	N-formyl-L-kynurenine amidohydrolase	H2O [cytoplasm] + N-formyl-L-kynurenine [cytoplasm] -> formate [cytoplasm] + H+ [cytoplasm] + L-kynurenine [cytoplasm]	YDR428C	0	Inf	0		18205391	R01959	YDR428C
r_0763	N-formyltyrosine oxidase	H+ [cytoplasm] + 2 N-formyl-L-tyrosine [cytoplasm] + NADPH [cytoplasm] -> N,N'-diformyldityrosine [cytoplasm] + NADP(+) [cytoplasm]	( YDR402C and YDR403W )	0	Inf	0		8706696		['YDR402C', 'YDR403W']
r_0764	NAD diphosphatase	H2O [peroxisome] + NAD [peroxisome] -> AMP [peroxisome] + 2 H+ [peroxisome] + NMN [peroxisome]	YGL067W	0	Inf	0				YGL067W
r_0765	NAD kinase	ATP [cytoplasm] + NAD [cytoplasm] -> ADP [cytoplasm] + H+ [cytoplasm] + NADP(+) [cytoplasm]	( YEL041W or YJR049C )	0	Inf	0		15978040	R00104	[['YEL041W', 'YJR049C']]
r_0766	NAD kinase	ATP [mitochondrion] + NAD [mitochondrion] -> ADP [mitochondrion] + H+ [mitochondrion] + NADP(+) [mitochondrion]	( YEL041W or YJR049C or YPL188W )	0	Inf	0		15978040	R00104	[['YEL041W', 'YJR049C', 'YPL188W']]
r_0767	NAD nucleosidase nuclear	H2O [nucleus] + NAD [nucleus] -> ADP-ribose [nucleus] + H+ [nucleus] + nicotinamide [nucleus]	( YDL042C or YDR191W or YOL068C or YOR025W or YPL015C )	0	Inf	0		17482543	R00102	[['YDL042C', 'YDR191W', 'YOL068C', 'YOR025W', 'YPL015C']]
r_0768	NAD synthase	ATP [cytoplasm] + deamido-NAD(+) [cytoplasm] + H2O [cytoplasm] + L-glutamine [cytoplasm] -> AMP [cytoplasm] + diphosphate [cytoplasm] + H+ [cytoplasm] + L-glutamate [cytoplasm] + NAD [cytoplasm]	YHR074W	0	Inf	0		12771147		YHR074W
r_0769	NAD synthase	ATP [nucleus] + deamido-NAD(+) [nucleus] + H2O [nucleus] + L-glutamine [nucleus] <=> AMP [nucleus] + diphosphate [nucleus] + H+ [nucleus] + L-glutamate [nucleus] + NAD [nucleus]	YHR074W	-Inf	Inf	0		12771147		YHR074W
r_0770	NADH dehydrogenase, cytosolic/mitochondrial	H+ [cytoplasm] + NADH [cytoplasm] + ubiquinone-6 [mitochondrion] -> NAD [cytoplasm] + ubiquinol-6 [mitochondrion]	( YDL085W or YMR145C )	0	Inf	0		9733747		[['YDL085W', 'YMR145C']]
r_0771	NADH kinase	ATP [cytoplasm] + NADH [cytoplasm] -> ADP [cytoplasm] + H+ [cytoplasm] + NADPH [cytoplasm]	( YEL041W or YJR049C )	0	Inf	0		15978040	R00105	[['YEL041W', 'YJR049C']]
r_0772	NADH kinase mitochondrial	ATP [mitochondrion] + NADH [mitochondrion] -> ADP [mitochondrion] + H+ [mitochondrion] + NADPH [mitochondrion]	( YEL041W or YJR049C or YPL188W )	0	Inf	0		15978040	R00105	[['YEL041W', 'YJR049C', 'YPL188W']]
r_0773	NADH:ubiquinone oxidoreductase	H+ [mitochondrion] + NADH [mitochondrion] + ubiquinone-6 [mitochondrion] -> NAD [mitochondrion] + ubiquinol-6 [mitochondrion]	YML120C	0	Inf	0				YML120C
r_0774	NAPRtase	H+ [cytoplasm] + nicotinate [cytoplasm] + PRPP [cytoplasm] -> diphosphate [cytoplasm] + nicotinic acid D-ribonucleotide [cytoplasm]	YOR209C	0	Inf	0			R01724	YOR209C
r_0775	NAPRtase	H+ [mitochondrion] + nicotinate [mitochondrion] + PRPP [mitochondrion] -> diphosphate [mitochondrion] + nicotinic acid D-ribonucleotide [mitochondrion]	YOR209C	0	Inf	0			R01724	YOR209C
r_0781	nicotinamidase	H2O [cytoplasm] + nicotinamide [cytoplasm] -> ammonium [cytoplasm] + nicotinate [cytoplasm]	YGL037C	0	Inf	0				YGL037C
r_0782	nicotinamide N-methyltransferase	nicotinamide [cytoplasm] + S-adenosyl-L-methionine [cytoplasm] -> 1-methylnicotinamide [cytoplasm] + S-adenosyl-L-homocysteine [cytoplasm]	YLR285W	0	Inf	0		12736687	R01269	YLR285W
r_0783	nicotinamide-nucleotide adenylyltransferase	ATP [cytoplasm] + H+ [cytoplasm] + NMN [cytoplasm] -> diphosphate [cytoplasm] + NAD [cytoplasm]	YLR328W	0	Inf	0		15078171	R00137	YLR328W
r_0784	nicotinamide-nucleotide adenylyltransferase	ATP [nucleus] + H+ [nucleus] + NMN [nucleus] -> diphosphate [nucleus] + NAD [nucleus]	( YGR010W or YLR328W )	0	Inf	0		15078171	R00137	[['YGR010W', 'YLR328W']]
r_0785	nicotinate-nucleotide adenylyltransferase	ATP [cytoplasm] + H+ [cytoplasm] + nicotinic acid D-ribonucleotide [cytoplasm] -> deamido-NAD(+) [cytoplasm] + diphosphate [cytoplasm]	( YGR010W or YLR328W )	0	Inf	0		15078171	R03005	[['YGR010W', 'YLR328W']]
r_0786	nicotinate-nucleotide diphosphorylase (carboxylating)	2 H+ [cytoplasm] + PRPP [cytoplasm] + quinolinate [cytoplasm] -> carbon dioxide [cytoplasm] + diphosphate [cytoplasm] + nicotinic acid D-ribonucleotide [cytoplasm]	YFR047C	0	Inf	0			R03348	YFR047C
r_0787	nicotinate-nucleotide diphosphorylase (carboxylating)	2 H+ [mitochondrion] + PRPP [mitochondrion] + quinolinate [mitochondrion] -> carbon dioxide [mitochondrion] + diphosphate [mitochondrion] + nicotinic acid D-ribonucleotide [mitochondrion]	YFR047C	0	Inf	0			R03348	YFR047C
r_0788	nucleoside diphosphatase	ADP [cytoplasm] + H2O [cytoplasm] -> AMP [cytoplasm] + H+ [cytoplasm] + phosphate [cytoplasm]	YER005W	0	Inf	0		10409709	R00122	YER005W
r_0789	nucleoside diphosphatase	GDP [cytoplasm] + H2O [cytoplasm] -> GMP [cytoplasm] + H+ [cytoplasm] + phosphate [cytoplasm]	YER005W	0	Inf	0		10409709	R00328	YER005W
r_0790	nucleoside diphosphatase	H2O [cytoplasm] + UDP [cytoplasm] -> H+ [cytoplasm] + phosphate [cytoplasm] + UMP [cytoplasm]	YER005W	0	Inf	0		10409709	R00155	YER005W
r_0791	nucleoside diphosphatase	H2O [Golgi] + UDP [Golgi] -> H+ [Golgi] + phosphate [Golgi] + UMP [Golgi]	YEL042W	0	Inf	0			R00155	YEL042W
r_0792	nucleoside diphosphatase	CDP [cytoplasm] + H2O [cytoplasm] -> CMP [cytoplasm] + H+ [cytoplasm] + phosphate [cytoplasm]	YER005W	0	Inf	0			R00514	YER005W
r_0793	nucleoside diphosphatase	H2O [cytoplasm] + IDP [cytoplasm] -> H+ [cytoplasm] + IMP [cytoplasm] + phosphate [cytoplasm]	YER005W	0	Inf	0			R00961	YER005W
r_0795	nucleoside diphosphate kinase	ATP [cytoplasm] + CDP [cytoplasm] -> ADP [cytoplasm] + CTP [cytoplasm]	YKL067W	0	Inf	0			R00570	YKL067W
r_0796	nucleoside diphosphate kinase	ATP [cytoplasm] + dADP [cytoplasm] -> ADP [cytoplasm] + dATP [cytoplasm]	YKL067W	0	Inf	0			R01137	YKL067W
r_0797	nucleoside diphosphate kinase	ATP [cytoplasm] + dCDP [cytoplasm] -> ADP [cytoplasm] + dCTP [cytoplasm]	YKL067W	0	Inf	0			R02326	YKL067W
r_0798	nucleoside diphosphate kinase	ATP [cytoplasm] + dGDP [cytoplasm] -> ADP [cytoplasm] + dGTP [cytoplasm]	YKL067W	0	Inf	0			R01857	YKL067W
r_0799	nucleoside diphosphate kinase	ATP [cytoplasm] + dTDP [cytoplasm] -> ADP [cytoplasm] + dTTP [cytoplasm]	YKL067W	0	Inf	0			R02093	YKL067W
r_0800	nucleoside diphosphate kinase	ATP [cytoplasm] + GDP [cytoplasm] -> ADP [cytoplasm] + GTP [cytoplasm]	YKL067W	0	Inf	0			R00330	YKL067W
r_0801	nucleoside diphosphate kinase	ATP [cytoplasm] + IDP [cytoplasm] -> ADP [cytoplasm] + ITP [cytoplasm]	YKL067W	0	Inf	0			R00722	YKL067W
r_0802	nucleoside diphosphate kinase	ATP [cytoplasm] + dIDP [cytoplasm] <=> ADP [cytoplasm] + dITP [cytoplasm]	YKL067W	-Inf	Inf	0			R03530	YKL067W
r_0803	nucleoside diphosphate kinase	ATP [cytoplasm] + dUDP [cytoplasm] <=> ADP [cytoplasm] + dUTP [cytoplasm]	YKL067W	-Inf	Inf	0			R02331	YKL067W
r_0804	nucleoside triphosphatase	GTP [cytoplasm] + H2O [cytoplasm] -> GDP [cytoplasm] + H+ [cytoplasm] + phosphate [cytoplasm]	YER005W	0	Inf	0		10409709		YER005W
r_0805	nucleoside triphosphatase	H2O [cytoplasm] + UTP [cytoplasm] -> H+ [cytoplasm] + phosphate [cytoplasm] + UDP [cytoplasm]	YER005W	0	Inf	0		10409709	R00159	YER005W
r_0806	nucleoside triphosphatase	CTP [cytoplasm] + H2O [cytoplasm] -> CDP [cytoplasm] + H+ [cytoplasm] + phosphate [cytoplasm]	YER005W	0	Inf	0			R00569	YER005W
r_0807	nucleoside triphosphatase	H2O [cytoplasm] + ITP [cytoplasm] -> H+ [cytoplasm] + IDP [cytoplasm] + phosphate [cytoplasm]	YER005W	0	Inf	0				YER005W
r_0810	nucleoside-diphosphatase (GDP), Golgi	GDP [Golgi] + H2O [Golgi] -> GMP [Golgi] + H+ [Golgi] + phosphate [Golgi]	YEL042W	0	Inf	0			R00328	YEL042W
r_0811	nucleoside-diphosphate kinase (ATP:UDP)	ATP [cytoplasm] + UDP [cytoplasm] -> ADP [cytoplasm] + UTP [cytoplasm]	YKL067W	0	Inf	0			R00156	YKL067W
r_0812	O-acetylhomoserine (thiol)-lyase	methanethiol [cytoplasm] + O-acetyl-L-homoserine [cytoplasm] -> acetate [cytoplasm] + H+ [cytoplasm] + L-methionine [cytoplasm]	YLR303W	0	Inf	0		15042590	R00651	YLR303W
r_0813	O-acetylhomoserine (thiol)-lyase	hydrogen sulfide [cytoplasm] + O-acetyl-L-homoserine [cytoplasm] -> acetate [cytoplasm] + H+ [cytoplasm] + L-homocysteine [cytoplasm]	YLR303W	0	Inf	0		15042590	R01287	YLR303W
r_0815	O-succinylhomoserine lyase (L-cysteine)	L-cysteine [cytoplasm] + O-succinyl-L-homoserine [cytoplasm] <=> H+ [cytoplasm] + L-cystathionine [cytoplasm] + succinate [cytoplasm]	YAL012W	-Inf	Inf	0		8511969	R03260	YAL012W
r_0816	ornithine carbamoyltransferase	carbamoyl phosphate [cytoplasm] + ornithine [cytoplasm] -> H+ [cytoplasm] + L-citrulline [cytoplasm] + phosphate [cytoplasm]	YJL088W	0	Inf	0				YJL088W
r_0817	ornithine decarboxylase	H+ [cytoplasm] + ornithine [cytoplasm] -> carbon dioxide [cytoplasm] + putrescine [cytoplasm]	YKL184W	0	Inf	0				YKL184W
r_0818	ornithine transacetylase	L-glutamate [mitochondrion] + N(2)-acetyl-L-ornithine [mitochondrion] -> N-acetyl-L-glutamate [mitochondrion] + ornithine [mitochondrion]	YMR062C	0	Inf	0				YMR062C
r_0819	ornithine transaminase	2-oxoglutarate [cytoplasm] + ornithine [cytoplasm] -> L-glutamate [cytoplasm] + L-glutamic 5-semialdehyde [cytoplasm]	YLR438W	0	Inf	0				YLR438W
r_0820	orotate phosphoribosyltransferase	diphosphate [cytoplasm] + orotidine 5'-(dihydrogen phosphate) [cytoplasm] <=> orotate [cytoplasm] + PRPP [cytoplasm]	( YML106W or YMR271C )	-Inf	Inf	0			R01870	[['YML106W', 'YMR271C']]
r_0821	orotidine-5'-phosphate decarboxylase	H+ [cytoplasm] + orotidine 5'-(dihydrogen phosphate) [cytoplasm] -> carbon dioxide [cytoplasm] + UMP [cytoplasm]	YEL021W	0	Inf	0			R00965	YEL021W
r_0831	oxoglutarate dehydrogenase (dihydrolipoamide S-succinyltransferase)	coenzyme A [mitochondrion] + S(8)-succinyldihydrolipoamide [mitochondrion] -> dihydrolipoamide [mitochondrion] + succinyl-CoA [mitochondrion]	( YDR148C and YFL018C and YIL125W )	0	Inf	0		2178788		['YDR148C', 'YFL018C', 'YIL125W']
r_0832	oxoglutarate dehydrogenase (lipoamide)	2-oxoglutarate [mitochondrion] + H+ [mitochondrion] + lipoamide [mitochondrion] -> carbon dioxide [mitochondrion] + S(8)-succinyldihydrolipoamide [mitochondrion]	( YDR148C and YFL018C and YIL125W )	0	Inf	0		10224250		['YDR148C', 'YFL018C', 'YIL125W']
r_0841	pantetheine-phosphate adenylyltransferase	ATP [cytoplasm] + H+ [cytoplasm] + pantetheine 4'-phosphate [cytoplasm] -> 3'-dephospho-CoA [cytoplasm] + diphosphate [cytoplasm]	YGR277C	0	Inf	0		19266201	R03035	YGR277C
r_0842	pantothenate kinase	(R)-pantothenate [cytoplasm] + ATP [cytoplasm] -> (R)-4'-phosphopantothenic acid [cytoplasm] + ADP [cytoplasm] + H+ [cytoplasm]	YDR531W	0	Inf	0			R03018	YDR531W
r_0843	pantothenate synthase	(R)-pantoate [cytoplasm] + ATP [cytoplasm] + beta-alanine [cytoplasm] -> (R)-pantothenate [cytoplasm] + AMP [cytoplasm] + diphosphate [cytoplasm] + H+ [cytoplasm]	YIL145C	0	Inf	0			R02473	YIL145C
r_0844	peroxisomal acyl-CoA thioesterase	decanoyl-CoA [peroxisome] + H2O [peroxisome] -> coenzyme A [peroxisome] + decanoate [peroxisome] + H+ [peroxisome]	YJR019C	0	Inf	0		10092594		YJR019C
r_0845	peroxisomal acyl-CoA thioesterase	H2O [peroxisome] + lauroyl-CoA [peroxisome] -> coenzyme A [peroxisome] + H+ [peroxisome] + laurate [peroxisome]	YJR019C	0	Inf	0		10092594		YJR019C
r_0847	peroxisomal acyl-CoA thioesterase	H2O [peroxisome] + palmitoyl-CoA [peroxisome] -> coenzyme A [peroxisome] + H+ [peroxisome] + palmitate [peroxisome]	YJR019C	0	Inf	0		10092594	R01274	YJR019C
r_0848	peroxisomal acyl-CoA thioesterase	H2O [peroxisome] + myristoyl-CoA [peroxisome] -> coenzyme A [peroxisome] + H+ [peroxisome] + myristate [peroxisome]	YJR019C	0	Inf	0		10092594		YJR019C
r_0849	peroxisomal acyl-CoA thioesterase	H2O [peroxisome] + stearoyl-CoA [peroxisome] -> coenzyme A [peroxisome] + H+ [peroxisome] + stearate [peroxisome]	YJR019C	0	Inf	0		10092594	R08174	YJR019C
r_0850	peroxisomal acyl-CoA thioesterase	H2O [peroxisome] + octanoyl-CoA [peroxisome] -> coenzyme A [peroxisome] + H+ [peroxisome] + octanoate [peroxisome]	YJR019C	0	Inf	0		10092594		YJR019C
r_0851	phenylalanine transaminase	2-oxoglutarate [cytoplasm] + L-phenylalanine [cytoplasm] <=> keto-phenylpyruvate [cytoplasm] + L-glutamate [cytoplasm]	YGL202W	-Inf	Inf	0		9491082; 9491083	R00694	YGL202W
r_0852	phenylalanyl-tRNA synthetase	ATP [cytoplasm] + L-phenylalanine [cytoplasm] + tRNA(Phe), cytoplasmic [cytoplasm] -> AMP [cytoplasm] + diphosphate [cytoplasm] + Phe-tRNA(Phe) [cytoplasm]	( YFL022C and YLR060W )	0	Inf	0		3049607	R03660	['YFL022C', 'YLR060W']
r_0853	phenylalanyl-tRNA synthetase	ATP [mitochondrion] + L-phenylalanine [mitochondrion] + tRNA(Phe), mitchondrial [mitochondrion] -> AMP [mitochondrion] + diphosphate [mitochondrion] + Phe-tRNA(Phe) [mitochondrion]	YPR047W	0	Inf	0		3029120	R03660	YPR047W
r_0854	phenylpyruvate decarboxylase	H+ [cytoplasm] + keto-phenylpyruvate [cytoplasm] -> carbon dioxide [cytoplasm] + phenylacetaldehyde [cytoplasm]	YDR380W	0	Inf	0		12902239	R01377	YDR380W
r_0855	phopshoribosylaminoimidazole synthetase	5'-phosphoribosyl-N-formylglycineamidine [cytoplasm] + ATP [cytoplasm] -> 5'-phosphoribosyl-5-aminoimidazole [cytoplasm] + ADP [cytoplasm] + 2 H+ [cytoplasm] + phosphate [cytoplasm]	YGL234W	0	Inf	0			R04208	YGL234W	c
r_0882	phosphoacetylglucosamine mutase	N-acetyl-D-glucosamine 6-phosphate [cytoplasm] <=> N-acetyl-alpha-D-glucosamine 1-phosphate [cytoplasm]	YEL058W	-Inf	Inf	0		8174553	R08193	YEL058W
r_0883	phosphoadenylyl-sulfate reductase (thioredoxin)	3'-phospho-5'-adenylyl sulfate [cytoplasm] + TRX1 [cytoplasm] -> adenosine 3',5'-bismonophosphate [cytoplasm] + 2 H+ [cytoplasm] + sulphite [cytoplasm] + TRX1 disulphide [cytoplasm]	(( YGR209C and YPR167C ) or ( YLR043C and YPR167C ))	0	Inf	0		2203779		[['YGR209C', 'YPR167C'], ['YLR043C', 'YPR167C']]
r_0884	phosphoenolpyruvate carboxykinase	ATP [cytoplasm] + oxaloacetate [cytoplasm] -> ADP [cytoplasm] + carbon dioxide [cytoplasm] + phosphoenolpyruvate [cytoplasm]	YKR097W	0	Inf	0			R00341	YKR097W
r_0885	phosphoethanolamine cytidyltransferase	CTP [cytoplasm] + H+ [cytoplasm] + O-phosphoethanolamine [cytoplasm] -> CDP-ethanolamine [cytoplasm] + diphosphate [cytoplasm]	YGR007W	0	Inf	0			R02038	YGR007W
r_0886	phosphofructokinase	ATP [cytoplasm] + D-fructose 6-phosphate [cytoplasm] -> ADP [cytoplasm] + D-fructose 1,6-bisphosphate [cytoplasm] + H+ [cytoplasm]	( YGR240C and YMR205C )	0	Inf	0		3007939	R00756	['YGR240C', 'YMR205C']
r_0887	phosphofructokinase (s7p)	ATP [cytoplasm] + sedoheptulose 7-phosphate [cytoplasm] -> ADP [cytoplasm] + H+ [cytoplasm] + sedoheptulose 1,7-bisphosphate [cytoplasm]	( YGR240C and YMR205C )	0	Inf	0			R01843	['YGR240C', 'YMR205C']
r_0888	phosphoglucomutase	D-glucose 6-phosphate [cytoplasm] <=> D-glucose 1-phosphate [cytoplasm]	( YKL127W or YMR105C )	-Inf	Inf	0		18042468; 8119301	R08639	[['YKL127W', 'YMR105C']]
r_0889	phosphogluconate dehydrogenase	6-phospho-D-gluconate [cytoplasm] + NADP(+) [cytoplasm] -> carbon dioxide [cytoplasm] + D-ribulose 5-phosphate [cytoplasm] + NADPH [cytoplasm]	( YGR256W or YHR183W )	0	Inf	0		24626	R01528	[['YGR256W', 'YHR183W']]
r_0890	phosphoglucosamine mutase	alpha-D-glucosamine 1-phosphate [cytoplasm] <=> alpha-D-glucosamine 6-phosphate [cytoplasm]	YEL058W	-Inf	Inf	0		8174553	R02060	YEL058W
r_0891	phosphoglycerate dehydrogenase	3-phosphoglycerate [cytoplasm] + NAD [cytoplasm] -> 3-phospho-hydroxypyruvate [cytoplasm] + H+ [cytoplasm] + NADH [cytoplasm]	( YER081W or YIL074C )	0	Inf	0		12525494	R01513	[['YER081W', 'YIL074C']]
r_0892	phosphoglycerate kinase	1,3-bisphospho-D-glycerate [cytoplasm] + ADP [cytoplasm] <=> 3-phosphoglycerate [cytoplasm] + ATP [cytoplasm]	YCR012W	-Inf	Inf	0		6347186	R01512	YCR012W
r_0893	phosphoglycerate mutase	3-phosphoglycerate [cytoplasm] <=> 2-phospho-D-glyceric acid [cytoplasm]	YKL152C	-Inf	Inf	0		3033435	R01518	YKL152C
r_0902	phosphomannomutase	D-mannose 1-phosphate [cytoplasm] <=> D-mannose 6-phosphate [cytoplasm]	YFL045C	-Inf	Inf	0			R01818	YFL045C
r_0903	phosphomethylpyrimidine kinase	4-amino-2-methyl-5-phosphomethylpyrimidine [cytoplasm] + ATP [cytoplasm] -> 4-amino-2-methyl-5-diphosphomethylpyrimidine [cytoplasm] + ADP [cytoplasm]	( YOL055C or YPL258C or YPR121W )	0	Inf	0		10383756	R04509	[['YOL055C', 'YPL258C', 'YPR121W']]
r_0904	phosphomevalonate kinase	(R)-5-phosphomevalonic acid [cytoplasm] + ATP [cytoplasm] -> (R)-5-diphosphomevalonic acid [cytoplasm] + ADP [cytoplasm]	YMR220W	0	Inf	0			R03245	YMR220W
r_0905	phosphopantothenate-cysteine ligase	(R)-4'-phosphopantothenic acid [cytoplasm] + CTP [cytoplasm] + L-cysteine [cytoplasm] -> CMP [cytoplasm] + diphosphate [cytoplasm] + H+ [cytoplasm] + N-[(R)-4-phosphonopantothenoyl]-L-cysteine [cytoplasm]	YIL083C	0	Inf	0			R04231	YIL083C
r_0906	phosphopantothenoylcysteine decarboxylase	H+ [cytoplasm] + N-[(R)-4-phosphonopantothenoyl]-L-cysteine [cytoplasm] -> carbon dioxide [cytoplasm] + pantetheine 4'-phosphate [cytoplasm]	(( YKL088W and YKR072C and YOR054C ) or ( YKL088W and YKR072C ) or ( YKL088W and YOR054C ) or YKL088W )	0	Inf	0			R03269	[['YKL088W', 'YKR072C', 'YOR054C'], ['YKL088W', 'YKR072C'], ['YKL088W', 'YOR054C'], ['YKL088W']]
r_0907	phosphopentomutase	alpha-D-ribose 1-phosphate [cytoplasm] <=> ribose-5-phosphate [cytoplasm]	( YKL127W or YMR105C or YMR278W )	-Inf	Inf	0				[['YKL127W', 'YMR105C', 'YMR278W']]
r_0908	phosphoribosyl amino imidazolesuccinocarbozamide synthetase	ATP [cytoplasm] + L-aspartate [cytoplasm] + phosphoribosyl-carboxy-aminoimidazole [cytoplasm] -> 5'-phosphoribosyl-4-(N-succinocarboxamide)-5-aminoimidazole [cytoplasm] + ADP [cytoplasm] + H+ [cytoplasm] + phosphate [cytoplasm]	YAR015W	0	Inf	0			R04591	YAR015W	c
r_0909	phosphoribosyl-AMP cyclohydrolase	1-(5-phosphoribosyl)-5'-AMP [cytoplasm] + H2O [cytoplasm] -> 1-(5-phospho-D-ribosyl)-5-[(5-phospho-D-ribosylamino)methylideneamino]imidazole-4-carboxamide [cytoplasm]	YCL030C	0	Inf	0		7049842	R04037	YCL030C
r_0910	phosphoribosyl-ATP pyrophosphatase	5-phosphoribosyl-ATP [cytoplasm] + H2O [cytoplasm] -> 1-(5-phosphoribosyl)-5'-AMP [cytoplasm] + diphosphate [cytoplasm] + H+ [cytoplasm]	YCL030C	0	Inf	0			R04035	YCL030C
r_0911	phosphoribosylaminoimidazole-carboxylase	5'-phosphoribosyl-5-aminoimidazole [cytoplasm] + ATP [cytoplasm] + carbon dioxide [cytoplasm] + H2O [cytoplasm] -> ADP [cytoplasm] + H+ [cytoplasm] + phosphate [cytoplasm] + phosphoribosyl-carboxy-aminoimidazole [cytoplasm]	YOR128C	0	Inf	0			R04209	YOR128C
r_0912	phosphoribosylaminoimidazolecarboxamide formyltransferase	10-formyl-THF [cytoplasm] + AICAR [cytoplasm] <=> phosphoribosyl-formamido-carboxamide [cytoplasm] + THF [cytoplasm]	( YLR028C or YMR120C )	-Inf	Inf	0			R04560	[['YLR028C', 'YMR120C']]
r_0913	phosphoribosylanthranilate isomerase	N-(5-phospho-beta-D-ribosyl)anthranilate [cytoplasm] -> 1-(2-carboxyphenylamino)-1-deoxy-D-ribulose 5-phosphate [cytoplasm]	YDR007W	0	Inf	0		348687	R03509	YDR007W
r_0914	phosphoribosylglycinamidine synthetase	5-phosphoribosylamine [cytoplasm] + ATP [cytoplasm] + L-glycine [cytoplasm] -> 5-phospho-ribosyl-glycineamide [cytoplasm] + ADP [cytoplasm] + H+ [cytoplasm] + phosphate [cytoplasm]	YGL234W	0	Inf	0			R04144	YGL234W	c
r_0915	phosphoribosylpyrophosphate amidotransferase	H2O [cytoplasm] + L-glutamine [cytoplasm] + PRPP [cytoplasm] -> 5-phosphoribosylamine [cytoplasm] + diphosphate [cytoplasm] + L-glutamate [cytoplasm]	YMR300C	0	Inf	0			R01072	YMR300C	c
r_0916	phosphoribosylpyrophosphate synthetase	ATP [cytoplasm] + ribose-5-phosphate [cytoplasm] -> AMP [cytoplasm] + H+ [cytoplasm] + PRPP [cytoplasm]	(( YBL068W and YOL061W ) or ( YER099C and YOL061W ) or ( YHL011C and YKL181W ))	0	Inf	0		10212224		[['YBL068W', 'YOL061W'], ['YER099C', 'YOL061W'], ['YHL011C', 'YKL181W']]
r_0917	phosphoserine phosphatase (L-serine)	3-phospho-serine [cytoplasm] + H2O [cytoplasm] -> L-serine [cytoplasm] + phosphate [cytoplasm]	YGR208W	0	Inf	0		1326413	R00582	YGR208W
r_0918	phosphoserine transaminase	3-phospho-hydroxypyruvate [cytoplasm] + L-glutamate [cytoplasm] -> 2-oxoglutarate [cytoplasm] + 3-phospho-serine [cytoplasm]	YOR184W	0	Inf	0		8017107	R04173	YOR184W
r_0919	phytoceramidase	lignoceric acid [endoplasmic reticulum] + phytosphingosine [endoplasmic reticulum] -> ceramide-2 (C24) [endoplasmic reticulum]	YBR183W	0	Inf	0		10702247; 18296751		YBR183W
r_0920	phytoceramidase	cerotic acid [endoplasmic reticulum] + phytosphingosine [endoplasmic reticulum] -> ceramide-2 (C26) [endoplasmic reticulum]	YDR402C	0	Inf	0			R06527	YDR402C
r_0921	Phytosphingosine phosphate lyase	phytosphingosine 1-phosphate [endoplasmic reticulum] -> 2-hydroxyhexadecanal [endoplasmic reticulum] + O-phosphoethanolamine [endoplasmic reticulum]	YDR294C	0	Inf	0		18296751; 9334171		YDR294C
r_0922	phytosphingosine synthesis	H+ [endoplasmic reticulum] + NADPH [endoplasmic reticulum] + oxygen [endoplasmic reticulum] + sphinganine [endoplasmic reticulum] -> H2O [endoplasmic reticulum] + NADP(+) [endoplasmic reticulum] + phytosphingosine [endoplasmic reticulum]	YDR297W	0	Inf	0		18296751; 9368039	R06525	YDR297W
r_0929	polyamine oxidase	H2O [cytoplasm] + N(1)-acetylspermidine [cytoplasm] + oxygen [cytoplasm] -> 3-aminopropanal [cytoplasm] + hydrogen peroxide [cytoplasm] + N-acetylputrescine [cytoplasm]	YMR020W	0	Inf	0		12670477		YMR020W
r_0935	porphobilinogen synthase	2 5-aminolevulinate [cytoplasm] -> H+ [cytoplasm] + 2 H2O [cytoplasm] + porphobilinogen [cytoplasm]	YGL040C	0	Inf	0			R00036	YGL040C
r_0936	poylamine oxidase	H2O [cytoplasm] + N(1)-acetylspermine [cytoplasm] + oxygen [cytoplasm] -> 3-aminopropanal [cytoplasm] + hydrogen peroxide [cytoplasm] + N(1)-acetylspermidine [cytoplasm]	YMR020W	0	Inf	0		12670477		YMR020W
r_0937	poylamine oxidase	H2O [cytoplasm] + oxygen [cytoplasm] + spermine [cytoplasm] -> 3-aminopropanal [cytoplasm] + hydrogen peroxide [cytoplasm] + spermidine [cytoplasm]	YMR020W	0	Inf	0		12670477		YMR020W
r_0938	prephenate dehydratase	H+ [cytoplasm] + prephenate [cytoplasm] -> carbon dioxide [cytoplasm] + H2O [cytoplasm] + keto-phenylpyruvate [cytoplasm]	YNL316C	0	Inf	0		7502583	R01373	YNL316C
r_0939	prephenate dehydrogenase (NADP)	NADP(+) [cytoplasm] + prephenate [cytoplasm] -> 3-(4-hydroxyphenyl)pyruvate [cytoplasm] + carbon dioxide [cytoplasm] + NADPH [cytoplasm]	YBR166C	0	Inf	0		2697638	R01730	YBR166C
r_0940	proline oxidase (NAD)	FAD [mitochondrion] + L-proline [mitochondrion] -> 1-pyrroline-5-carboxylate [mitochondrion] + FADH2 [mitochondrion]	YLR142W	0	Inf	0				YLR142W
r_0941	prolyl-tRNA synthetase	ATP [cytoplasm] + L-proline [cytoplasm] + tRNA(Pro), cytoplasmic [cytoplasm] -> AMP [cytoplasm] + diphosphate [cytoplasm] + H+ [cytoplasm] + Pro-tRNA(Pro) [cytoplasm]	YHR020W	0	Inf	0			R03661	YHR020W
r_0942	protoporphyrinogen oxidase	3 oxygen [mitochondrion] + 2 protoporphyrinogen [mitochondrion] -> 6 H2O [mitochondrion] + 2 protoporphyrin [mitochondrion]	YER014W	0	Inf	0			R03222	YER014W
r_0943	purine-nucleoside phosphorylase	nicotinamide ribose [cytoplasm] + phosphate [cytoplasm] -> alpha-D-ribose 1-phosphate [cytoplasm] + H+ [cytoplasm] + nicotinamide [cytoplasm]	( YDR400W and YLR017W and YLR209C )	0	Inf	0		17482543		['YDR400W', 'YLR017W', 'YLR209C']
r_0949	guanosine phosphorylase	guanosine [cytoplasm] + phosphate [cytoplasm] <=> alpha-D-ribose 1-phosphate [cytoplasm] + guanine [cytoplasm]	YLR209C	-Inf	Inf	0		23670538		YLR209C
r_0950	guanosine phosphorylase	guanosine [mitochondrion] + phosphate [mitochondrion] <=> alpha-D-ribose 1-phosphate [mitochondrion] + guanine [mitochondrion]	YLR209C	-Inf	Inf	0		23670538		YLR209C
r_0951	inosine phosphorylase	inosine [cytoplasm] + phosphate [cytoplasm] <=> alpha-D-ribose 1-phosphate [cytoplasm] + hypoxanthine [cytoplasm]	YLR209C	-Inf	Inf	0		23670538		YLR209C
r_0953	pyridoxal oxidase	ammonium [cytoplasm] + 2 H2O [cytoplasm] + 0.5 oxygen [cytoplasm] + pyridoxal [cytoplasm] -> 2 hydrogen peroxide [cytoplasm] + pyridoxamine [cytoplasm]	YBR035C	0	Inf	0				YBR035C
r_0954	pyridoxamine 5'-phosphate oxidase	H2O [cytoplasm] + oxygen [cytoplasm] + pyridoxamine 5'-phosphate [cytoplasm] -> ammonium [cytoplasm] + hydrogen peroxide [cytoplasm] + pyridoxal 5'-phosphate [cytoplasm]	YBR035C	0	Inf	0				YBR035C
r_0955	pyridoxine 5'-phosphate oxidase	oxygen [cytoplasm] + pyridoxine 5'-phosphate [cytoplasm] <=> hydrogen peroxide [cytoplasm] + pyridoxal 5'-phosphate [cytoplasm]	YBR035C	-Inf	Inf	0			R00278	YBR035C
r_0956	pyridoxine oxidase	oxygen [cytoplasm] + pyridoxine [cytoplasm] -> hydrogen peroxide [cytoplasm] + pyridoxal [cytoplasm]	YBR035C	0	Inf	0			R01711	YBR035C
r_0957	pyrroline-5-carboxylate reductase	1-pyrroline-5-carboxylate [cytoplasm] + 2 H+ [cytoplasm] + NADPH [cytoplasm] -> L-proline [cytoplasm] + NADP(+) [cytoplasm]	YER023W	0	Inf	0				YER023W
r_0958	pyruvate carboxylase	ATP [cytoplasm] + bicarbonate [cytoplasm] + pyruvate [cytoplasm] -> ADP [cytoplasm] + H+ [cytoplasm] + oxaloacetate [cytoplasm] + phosphate [cytoplasm]	( YBR218C or YGL062W )	0	Inf	0			R00344	[['YBR218C', 'YGL062W']]
r_0959	pyruvate decarboxylase	H+ [cytoplasm] + pyruvate [cytoplasm] -> acetaldehyde [cytoplasm] + carbon dioxide [cytoplasm]	( YGR087C or YLR044C or YLR134W )	0	Inf	0			R00224	[['YGR087C', 'YLR044C', 'YLR134W']]
r_0960	pyruvate decarboxylase (acetoin-forming)	acetaldehyde [cytoplasm] + H+ [cytoplasm] + pyruvate [cytoplasm] -> (R)-acetoin [cytoplasm] + carbon dioxide [cytoplasm]	( YGR087C or YLR044C or YLR134W )	0	Inf	0		12902239		[['YGR087C', 'YLR044C', 'YLR134W']]
r_0961	pyruvate dehydrogenase	coenzyme A [mitochondrion] + NAD [mitochondrion] + pyruvate [mitochondrion] -> acetyl-CoA [mitochondrion] + carbon dioxide [mitochondrion] + NADH [mitochondrion]	( YBR221C and YER178W and YFL018C and YGR193C and YNL071W )	0	Inf	0		8433986	R00209	['YBR221C', 'YER178W', 'YFL018C', 'YGR193C', 'YNL071W']
r_0962	pyruvate kinase	ADP [cytoplasm] + H+ [cytoplasm] + phosphoenolpyruvate [cytoplasm] -> ATP [cytoplasm] + pyruvate [cytoplasm]	( YAL038W or YOR347C )	0	Inf	0		6185493	R00200	[['YAL038W', 'YOR347C']]
r_0963	quinone oxidoreductase	2-hexaprenyl-6-methoxy-3-methyl-1,4-benzoquinone [mitochondrion] + H+ [mitochondrion] + NADH [mitochondrion] + oxygen [mitochondrion] -> 2-hexaprenyl-5-hydroxy-6-methoxy-3-methyl-1,4-benzoquinone [mitochondrion] + H2O [mitochondrion] + NAD [mitochondrion]	( YDR204W and YGL119W and YGR255C and YLR201C and YML110C and YOL096C and YOR125C )	0	Inf	0				['YDR204W', 'YGL119W', 'YGR255C', 'YLR201C', 'YML110C', 'YOL096C', 'YOR125C']
r_0965	riboflavin kinase	ATP [cytoplasm] + riboflavin [cytoplasm] -> ADP [cytoplasm] + FMN [cytoplasm] + H+ [cytoplasm]	YDR236C	0	Inf	0			R00549	YDR236C
r_0966	riboflavin kinase	ATP [mitochondrion] + riboflavin [mitochondrion] -> ADP [mitochondrion] + FMN [mitochondrion] + H+ [mitochondrion]	YDR236C	0	Inf	0			R00549	YDR236C
r_0967	riboflavin synthase	2-hydroxy-3-oxobutyl phosphate [cytoplasm] + 5-amino-6-(D-ribitylamino)uracil [cytoplasm] -> 6,7-dimethyl-8-(1-D-ribityl)lumazine [cytoplasm] + 2 H2O [cytoplasm] + phosphate [cytoplasm]	YOL143C	0	Inf	0			R04457	YOL143C
r_0968	riboflavin synthase	2 6,7-dimethyl-8-(1-D-ribityl)lumazine [cytoplasm] -> 5-amino-6-(D-ribitylamino)uracil [cytoplasm] + riboflavin [cytoplasm]	YBR256C	0	Inf	0			R00066	YBR256C
r_0969	ribokinase	ATP [cytoplasm] + D-ribose [cytoplasm] -> ADP [cytoplasm] + H+ [cytoplasm] + ribose-5-phosphate [cytoplasm]	YCR036W	0	Inf	0		1964349		YCR036W
r_0970	ribonucleoside-triphosphate reductase (ATP)	ATP [cytoplasm] + TRX1 [cytoplasm] -> dATP [cytoplasm] + H2O [cytoplasm] + TRX1 disulphide [cytoplasm]	YGR209C	0	Inf	0			R02014	YGR209C
r_0971	ribonucleoside-triphosphate reductase (CTP)	CTP [cytoplasm] + TRX1 [cytoplasm] -> dCTP [cytoplasm] + H2O [cytoplasm] + TRX1 disulphide [cytoplasm]	YGR209C	0	Inf	0			R02022	YGR209C
r_0972	ribonucleoside-triphosphate reductase (GTP)	GTP [cytoplasm] + TRX1 [cytoplasm] -> dGTP [cytoplasm] + H2O [cytoplasm] + TRX1 disulphide [cytoplasm]	YGR209C	0	Inf	0			R02020	YGR209C
r_0973	ribonucleoside-triphosphate reductase (UTP)	UTP [cytoplasm] + TRX1 [cytoplasm] -> dUTP [cytoplasm] + H2O [cytoplasm] + TRX1 disulphide [cytoplasm]	YGR209C	0	Inf	0			R02023	YGR209C
r_0974	ribonucleotide reductase	ADP [cytoplasm] + TRX1 [cytoplasm] -> dADP [cytoplasm] + H2O [cytoplasm] + TRX1 disulphide [cytoplasm]	( YER070W or YGR180C or YIL066C or YJL026W )	0	Inf	0			R02017	[['YER070W', 'YGR180C', 'YIL066C', 'YJL026W']]
r_0975	ribonucleotide reductase	ADP [nucleus] + TRX1 [nucleus] -> dADP [nucleus] + H2O [nucleus] + TRX1 disulphide [nucleus]	( YER070W or YGR180C or YIL066C or YJL026W )	0	Inf	0			R02017	[['YER070W', 'YGR180C', 'YIL066C', 'YJL026W']]
r_0976	ribonucleotide reductase	CDP [cytoplasm] + TRX1 [cytoplasm] -> dCDP [cytoplasm] + H2O [cytoplasm] + TRX1 disulphide [cytoplasm]	( YER070W or YGR180C or YIL066C or YJL026W )	0	Inf	0			R02024	[['YER070W', 'YGR180C', 'YIL066C', 'YJL026W']]
r_0977	ribonucleotide reductase	CDP [nucleus] + TRX1 [nucleus] -> dCDP [nucleus] + H2O [nucleus] + TRX1 disulphide [nucleus]	( YER070W or YGR180C or YIL066C or YJL026W )	0	Inf	0			R02024	[['YER070W', 'YGR180C', 'YIL066C', 'YJL026W']]
r_0978	ribonucleotide reductase	GDP [cytoplasm] + TRX1 [cytoplasm] -> dGDP [cytoplasm] + H2O [cytoplasm] + TRX1 disulphide [cytoplasm]	( YER070W or YGR180C or YIL066C or YJL026W )	0	Inf	0			R02019	[['YER070W', 'YGR180C', 'YIL066C', 'YJL026W']]
r_0979	ribonucleotide reductase	GDP [nucleus] + TRX1 [nucleus] -> dGDP [nucleus] + H2O [nucleus] + TRX1 disulphide [nucleus]	( YER070W or YGR180C or YIL066C or YJL026W )	0	Inf	0			R02019	[['YER070W', 'YGR180C', 'YIL066C', 'YJL026W']]
r_0982	ribose-5-phosphate isomerase	D-ribulose 5-phosphate [cytoplasm] <=> ribose-5-phosphate [cytoplasm]	YOR095C	-Inf	Inf	0		9763699		YOR095C
r_0983	ribosylnicotinamide kinase	ATP [cytoplasm] + nicotinamide ribose [cytoplasm] -> ADP [cytoplasm] + H+ [cytoplasm] + NMN [cytoplasm]	YNL129W	0	Inf	0		15137942	R02324	YNL129W
r_0984	ribulose 5-phosphate 3-epimerase	D-ribulose 5-phosphate [cytoplasm] <=> D-xylulose 5-phosphate [cytoplasm]	YJL121C	-Inf	Inf	0		9032985	R01529	YJL121C
r_0985	S-adenosyl-L-methionine:3-hexaprenyl-4,5-dihydroxylate O-methyltransferase	3-hexaprenyl-4,5-dihydroxybenzoic acid [mitochondrion] + S-adenosyl-L-methionine [mitochondrion] -> 3-hexaprenyl-4-hydroxy-5-methoxybenzoic acid [mitochondrion] + H+ [mitochondrion] + S-adenosyl-L-homocysteine [mitochondrion]	( YDR204W and YGL119W and YGR255C and YLR201C and YML110C and YOL096C and YOR125C )	0	Inf	0		15792955	R04711	['YDR204W', 'YGL119W', 'YGR255C', 'YLR201C', 'YML110C', 'YOL096C', 'YOR125C']
r_0986	S-adenosyl-methionine delta-24-sterol-c-methyltransferase	S-adenosyl-L-methionine [cytoplasm] + zymosterol [cytoplasm] -> fecosterol [cytoplasm] + H+ [cytoplasm] + S-adenosyl-L-homocysteine [cytoplasm]	YML008C	0	Inf	0			R04427	YML008C
r_0987	S-formylglutathione hydralase	H2O [cytoplasm] + S-formylglutathione [cytoplasm] <=> formate [cytoplasm] + glutathione [cytoplasm] + H+ [cytoplasm]	YJL068C	-Inf	Inf	0			R00527	YJL068C
r_0988	saccharopine dehydrogenase (NAD, L-lysine forming)	H2O [cytoplasm] + L-saccharopine [cytoplasm] + NAD [cytoplasm] -> 2-oxoglutarate [cytoplasm] + H+ [cytoplasm] + L-lysine [cytoplasm] + NADH [cytoplasm]	YIR034C	0	Inf	0		3928261	R00715	YIR034C
r_0989	saccharopine dehydrogenase (NADP, L-glutamate forming)	H+ [cytoplasm] + L-allysine [cytoplasm] + L-glutamate [cytoplasm] + NADPH [cytoplasm] -> H2O [cytoplasm] + L-saccharopine [cytoplasm] + NADP(+) [cytoplasm]	YNR050C	0	Inf	0		3123231	R02315	YNR050C
r_0990	sedoheptulose 1,7-bisphosphate D-glyceraldehyde-3-phosphate-lyase	sedoheptulose 1,7-bisphosphate [cytoplasm] <=> D-erythrose 4-phosphate [cytoplasm] + dihydroxyacetone phosphate [cytoplasm]	YKL060C	-Inf	Inf	0			R01829	YKL060C
r_0992	serine O-acetyltransferase	acetyl-CoA [cytoplasm] + L-serine [cytoplasm] -> coenzyme A [cytoplasm] + O-acetyl-L-serine [cytoplasm]		0	Inf	0		8335636	R00586	nan
r_0993	serine palmitotransferase	L-serine [endoplasmic reticulum] + palmitoyl-CoA [endoplasmic reticulum] -> 3-ketosphinganine [endoplasmic reticulum] + carbon dioxide [endoplasmic reticulum] + coenzyme A [endoplasmic reticulum]	(( YBR058C-A and YDR062W and YMR296C ) or ( YDR062W and YMR296C ))	0	Inf	0		10713067; 18296751; 2066332; 8058731	R01281	[['YBR058C-A', 'YDR062W', 'YMR296C'], ['YDR062W', 'YMR296C']]
r_0995	seryl-tRNA synthetase	ATP [cytoplasm] + L-serine [cytoplasm] + tRNA(Ser), cytoplasmic [cytoplasm] -> AMP [cytoplasm] + diphosphate [cytoplasm] + Ser-tRNA(Ser) [cytoplasm]	( YDR023W or YHR011W )	0	Inf	0		3031581	R03662	[['YDR023W', 'YHR011W']]
r_0996	shikimate dehydrogenase	3-dehydroshikimate [cytoplasm] + H+ [cytoplasm] + NADPH [cytoplasm] -> NADP(+) [cytoplasm] + shikimate [cytoplasm]	YDR127W	0	Inf	0		6355828	R02413	YDR127W
r_0997	shikimate kinase	ATP [cytoplasm] + shikimate [cytoplasm] -> 3-phosphoshikimic acid [cytoplasm] + ADP [cytoplasm] + H+ [cytoplasm]	YDR127W	0	Inf	0		6355828	R02412	YDR127W
r_0998	sirohydrochlorin dehydrogenase	NAD [cytoplasm] + precorrin-2 [cytoplasm] -> H+ [cytoplasm] + NADH [cytoplasm] + sirohydrochlorin [cytoplasm]	YBR213W	0	Inf	0		11980703		YBR213W
r_0999	sirohydrochlorin ferrochetalase	iron [cytoplasm] + sirohydrochlorin [cytoplasm] -> 3 H+ [cytoplasm] + siroheme [cytoplasm]	YBR213W	0	Inf	0		11980703	R02864	YBR213W
r_1000	fumarate reductase (FMN)	FMNH2 [cytoplasm] + fumarate [cytoplasm] <=> FMN [cytoplasm] + succinate [cytoplasm]	YEL047C	-Inf	Inf	0		22672422; 12393208	R00408	YEL047C
r_1001	spermidine synthase	putrescine [cytoplasm] + S-adenosylmethioninamine [cytoplasm] -> 5'-S-methyl-5'-thioadenosine [cytoplasm] + H+ [cytoplasm] + spermidine [cytoplasm]	YPR069C	0	Inf	0			R01920	YPR069C
r_1002	spermine synthase	S-adenosylmethioninamine [cytoplasm] + spermidine [cytoplasm] -> 5'-S-methyl-5'-thioadenosine [cytoplasm] + H+ [cytoplasm] + spermine [cytoplasm]	YLR146C	0	Inf	0			R02869	YLR146C
r_1003	sphinganine phosphate lyase	sphinganine 1-phosphate [endoplasmic reticulum] -> hexadecanal [endoplasmic reticulum] + O-phosphoethanolamine [endoplasmic reticulum]	YDR294C	0	Inf	0		18296751; 9334171	R02464	YDR294C
r_1004	sphingoid base-phosphate phosphatase (phytosphingosine 1-phosphate)	H2O [endoplasmic reticulum] + phytosphingosine 1-phosphate [endoplasmic reticulum] -> phosphate [endoplasmic reticulum] + phytosphingosine [endoplasmic reticulum]	( YJL134W or YKR053C )	0	Inf	0		18296751; 9353337; 9419344		[['YJL134W', 'YKR053C']]
r_1005	sphingoid base-phosphate phosphatase (sphinganine 1-phosphatase)	H2O [endoplasmic reticulum] + sphinganine 1-phosphate [endoplasmic reticulum] -> phosphate [endoplasmic reticulum] + sphinganine [endoplasmic reticulum]	( YJL134W or YKR053C )	0	Inf	0		18296751; 9353337; 9419344	R06520	[['YJL134W', 'YKR053C']]
r_1006	sphingolipid long chain base kinase (phytosphingosine)	ATP [endoplasmic reticulum] + phytosphingosine [endoplasmic reticulum] -> ADP [endoplasmic reticulum] + H+ [endoplasmic reticulum] + phytosphingosine 1-phosphate [endoplasmic reticulum]	( YLR260W or YOR171C )	0	Inf	0		18296751; 9677363		[['YLR260W', 'YOR171C']]
r_1007	sphingolipid long chain base kinase (sphinganine)	ATP [endoplasmic reticulum] + sphinganine [endoplasmic reticulum] -> ADP [endoplasmic reticulum] + H+ [endoplasmic reticulum] + sphinganine 1-phosphate [endoplasmic reticulum]	( YLR260W or YOR171C )	0	Inf	0		18296751; 9677363	R02976	[['YLR260W', 'YOR171C']]
r_1008	spontaneous cis-aconitate(3-) to trans-aconitate	cis-aconitate [mitochondrion] <=> trans-aconitate [mitochondrion]		-Inf	Inf	0		11329290	R02244	nan
r_1009	spontaneous cis-aconitate(3-) to trans-aconitate	cis-aconitate [cytoplasm] <=> trans-aconitate [cytoplasm]		-Inf	Inf	0		11329290	R02244	nan
r_1010	squalene epoxidase (NAD)	H+ [endoplasmic reticulum] + NADH [endoplasmic reticulum] + oxygen [endoplasmic reticulum] + squalene [endoplasmic reticulum] -> (S)-2,3-epoxysqualene [endoplasmic reticulum] + H2O [endoplasmic reticulum] + NAD [endoplasmic reticulum]	YGR175C	0	Inf	0		10622712		YGR175C
r_1011	squalene epoxidase (NADP)	H+ [endoplasmic reticulum] + NADPH [endoplasmic reticulum] + oxygen [endoplasmic reticulum] + squalene [endoplasmic reticulum] -> (S)-2,3-epoxysqualene [endoplasmic reticulum] + H2O [endoplasmic reticulum] + NADP(+) [endoplasmic reticulum]	YGR175C	0	Inf	0		10622712	R02874	YGR175C
r_1012	squalene synthase	2 farnesyl diphosphate [cytoplasm] + H+ [cytoplasm] + NADPH [cytoplasm] -> 2 diphosphate [cytoplasm] + NADP(+) [cytoplasm] + squalene [cytoplasm]	YHR190W	0	Inf	0			R06223	YHR190W
r_1021	succinate dehydrogenase (ubiquinone-6)	succinate [mitochondrion] + ubiquinone-6 [mitochondrion] <=> fumarate [mitochondrion] + ubiquinol-6 [mitochondrion]	(( YDR178W and YJL045W and YKL141W and YLL041C ) or ( YDR178W and YKL141W and YKL148C and YLL041C ))	-Inf	Inf	0		9929002		[['YDR178W', 'YJL045W', 'YKL141W', 'YLL041C'], ['YDR178W', 'YKL141W', 'YKL148C', 'YLL041C']]
r_1022	succinate-CoA ligase (ADP-forming)	ADP [mitochondrion] + phosphate [mitochondrion] + succinyl-CoA [mitochondrion] -> ATP [mitochondrion] + coenzyme A [mitochondrion] + succinate [mitochondrion]	( YGR244C and YOR142W )	0	Inf	0		9874242	R00405	['YGR244C', 'YOR142W']
r_1023	succinate-semialdehyde dehydrogenase (NADP)	H2O [cytoplasm] + NADP(+) [cytoplasm] + succinic semialdehyde [cytoplasm] -> 2 H+ [cytoplasm] + NADPH [cytoplasm] + succinate [cytoplasm]	YBR006W	0	Inf	0		11031268	R00714	YBR006W
r_1024	sucrose hydrolyzing enxyme	H2O [extracellular] + sucrose [extracellular] -> D-fructose [extracellular] + D-glucose [extracellular]	YIL162W	0	Inf	0			R00801	YIL162W
r_1025	sulfate adenylyltransferase	ATP [cytoplasm] + H+ [cytoplasm] + sulphate [cytoplasm] -> 5'-adenylyl sulfate [cytoplasm] + diphosphate [cytoplasm]	YJR010W	0	Inf	0		197388	R00529	YJR010W
r_1026	sulfate adenylyltransferase (ADP)	ADP [cytoplasm] + H+ [cytoplasm] + sulphate [cytoplasm] -> 5'-adenylyl sulfate [cytoplasm] + phosphate [cytoplasm]	YCL050C	0	Inf	0		2556364	R00530	YCL050C
r_1027	sulfite reductase (NADPH2)	5 H+ [cytoplasm] + 3 NADPH [cytoplasm] + sulphite [cytoplasm] -> 3 H2O [cytoplasm] + hydrogen sulfide [cytoplasm] + 3 NADP(+) [cytoplasm]	( YFR030W and YJR137C )	0	Inf	0				['YFR030W', 'YJR137C']
r_1029	taurine dioxygenase	2-oxoglutarate [cytoplasm] + oxygen [cytoplasm] + taurine [cytoplasm] -> aminoacetaldehyde [cytoplasm] + carbon dioxide [cytoplasm] + H+ [cytoplasm] + succinate [cytoplasm] + sulphite [cytoplasm]	YLL057C	0	Inf	0		10482536		YLL057C
r_1030	tetrahydrofolate aminomethyltransferase	5,10-methenyl-THF [mitochondrion] + H2O [mitochondrion] -> 5-formyltetrahydrofolic acid [mitochondrion] + H+ [mitochondrion]	( YAL044C and YDR019C and YFL018C and YMR189W )	0	Inf	0				['YAL044C', 'YDR019C', 'YFL018C', 'YMR189W']
r_1031	tetrahydrofolate:L-glutamate gamma-ligase (ADP-forming)	ATP [cytoplasm] + L-glutamate [cytoplasm] + THF [cytoplasm] <=> 5,6,7,8-tetrahydrofolyl-L-glutamic acid [cytoplasm] + ADP [cytoplasm] + H+ [cytoplasm] + phosphate [cytoplasm]	( YKL132C or YOR241W )	-Inf	Inf	0		10799479; 21190580	R00942	[['YKL132C', 'YOR241W']]
r_1032	thiamin diphosphatase	2 H2O [extracellular] + TDP [extracellular] -> H+ [extracellular] + 2 phosphate [extracellular] + thiamine [extracellular]	YBR092C	0	Inf	0				YBR092C
r_1033	thiamin phosphatase	H2O [extracellular] + TMP [extracellular] -> phosphate [extracellular] + thiamine [extracellular]	YBR092C	0	Inf	0			R02135	YBR092C
r_1034	thiamine diphosphokinase	ATP [cytoplasm] + thiamine [cytoplasm] -> AMP [cytoplasm] + H+ [cytoplasm] + TDP [cytoplasm]	YOR143C	0	Inf	0			R00619	YOR143C
r_1035	thiamine-diphosphate kinase	ATP [cytoplasm] + TDP [cytoplasm] -> ADP [cytoplasm] + TTP [cytoplasm]	YOR143C	0	Inf	0			R00616	YOR143C
r_1036	thiamine-phosphate diphosphorylase	4-amino-2-methyl-5-diphosphomethylpyrimidine [cytoplasm] + 4-methyl-5-(2-phosphonooxyethyl)thiazole [cytoplasm] + H+ [cytoplasm] -> diphosphate [cytoplasm] + TMP [cytoplasm]	YPL214C	0	Inf	0			R03223	YPL214C
r_1037	thioredoxin	hydrogen peroxide [nucleus] + TRX1 [nucleus] -> 2 H2O [nucleus] + TRX1 disulphide [nucleus]	(( YGR209C and YIL010W ) or ( YIL010W and YLR043C ))	0	Inf	0		12730197		[['YGR209C', 'YIL010W'], ['YIL010W', 'YLR043C']]
r_1038	thioredoxin reductase (NADPH)	H+ [cytoplasm] + NADPH [cytoplasm] + TRX1 disulphide [cytoplasm] -> NADP(+) [cytoplasm] + TRX1 [cytoplasm]	(( YDR353W and YGR209C ) or ( YDR353W and YLR043C ) or YDR353W )	0	Inf	0			R02016	[['YDR353W', 'YGR209C'], ['YDR353W', 'YLR043C'], ['YDR353W']]
r_1039	thioredoxin reductase (NADPH)	H+ [mitochondrion] + NADPH [mitochondrion] + TRX1 disulphide [mitochondrion] -> NADP(+) [mitochondrion] + TRX1 [mitochondrion]	(( YCR083W and YHR106W ) or ( YCR083W and YPL091W ))	0	Inf	0		15701801	R02016	[['YCR083W', 'YHR106W'], ['YCR083W', 'YPL091W']]
r_1040	threonine aldolase	L-threonine [cytoplasm] -> acetaldehyde [cytoplasm] + L-glycine [cytoplasm]	YEL046C	0	Inf	0		9151955	R00751	YEL046C
r_1041	threonine synthase	H2O [cytoplasm] + O-phospho-L-homoserine [cytoplasm] -> L-threonine [cytoplasm] + phosphate [cytoplasm]	YCR053W	0	Inf	0		8082795	R01466	YCR053W
r_1042	threonyl-tRNA synthetase	ATP [cytoplasm] + L-threonine [cytoplasm] + tRNA(Thr), cytoplasmic [cytoplasm] -> AMP [cytoplasm] + diphosphate [cytoplasm] + Thr-tRNA(Thr) [cytoplasm]	YIL078W	0	Inf	0		2995918	R03663	YIL078W
r_1043	threonyl-tRNA synthetase	ATP [mitochondrion] + L-threonine [mitochondrion] + tRNA(Thr), mitchondrial [mitochondrion] -> AMP [mitochondrion] + diphosphate [mitochondrion] + Thr-tRNA(Thr) [mitochondrion]	YKL194C	0	Inf	0		2999113	R03663	YKL194C
r_1045	thymidylate synthase	5,10-methylenetetrahydrofolate [cytoplasm] + dUMP [cytoplasm] -> dihydrofolic acid [cytoplasm] + dTMP [cytoplasm]	YOR074C	0	Inf	0			R02101	YOR074C
r_1046	trans-aconitate 3-methyltransferase	S-adenosyl-L-methionine [cytoplasm] + trans-aconitate [cytoplasm] -> (2E)-3-(methoxycarbonyl)pent-2-enedioic acid [cytoplasm] + S-adenosyl-L-homocysteine [cytoplasm]	YER175C	0	Inf	0		15147181	R05763	YER175C
r_1047	trans-pentaprenyltranstransferase	isopentenyl diphosphate [mitochondrion] + pentaprenyl diphosphate [mitochondrion] -> diphosphate [mitochondrion] + hexaprenyl diphosphate [mitochondrion]	YBR003W	0	Inf	0		2198286	R05613	YBR003W
r_1048	transaldolase	glyceraldehyde 3-phosphate [cytoplasm] + sedoheptulose 7-phosphate [cytoplasm] <=> D-erythrose 4-phosphate [cytoplasm] + D-fructose 6-phosphate [cytoplasm]	YLR354C	-Inf	Inf	0		8300619		YLR354C
r_1049	transketolase 1	D-xylulose 5-phosphate [cytoplasm] + ribose-5-phosphate [cytoplasm] <=> glyceraldehyde 3-phosphate [cytoplasm] + sedoheptulose 7-phosphate [cytoplasm]	( YBR117C or YPR074C )	-Inf	Inf	0		8268320		[['YBR117C', 'YPR074C']]
r_1050	transketolase 2	D-erythrose 4-phosphate [cytoplasm] + D-xylulose 5-phosphate [cytoplasm] <=> D-fructose 6-phosphate [cytoplasm] + glyceraldehyde 3-phosphate [cytoplasm]	( YBR117C or YPR074C )	-Inf	Inf	0				[['YBR117C', 'YPR074C']]
r_1051	trehalose-phosphatase	alpha,alpha-trehalose 6-phosphate [cytoplasm] + H2O [cytoplasm] -> phosphate [cytoplasm] + trehalose [cytoplasm]	(( YBR126C and YDR074W and YML100W ) or ( YBR126C and YDR074W and YMR261C ))	0	Inf	0		21623372	R02778	[['YBR126C', 'YDR074W', 'YML100W'], ['YBR126C', 'YDR074W', 'YMR261C']]
r_1054	triose-phosphate isomerase	dihydroxyacetone phosphate [cytoplasm] <=> glyceraldehyde 3-phosphate [cytoplasm]	YDR050C	-Inf	Inf	0		6759603		YDR050C
r_1055	tryptophan synthase (indoleglycerol phosphate)	1-C-(indol-3-yl)glycerol 3-phosphate [cytoplasm] + L-serine [cytoplasm] -> glyceraldehyde 3-phosphate [cytoplasm] + H2O [cytoplasm] + L-tryptophan [cytoplasm]	YGL026C	0	Inf	0		6342605		YGL026C
r_1056	tryptophan transaminase	2-oxoglutarate [cytoplasm] + L-tryptophan [cytoplasm] -> indole-3-pyruvate [cytoplasm] + L-glutamate [cytoplasm]	YGL202W	0	Inf	0		9491082; 9491083	R00684	YGL202W
r_1057	tryptophanyl-tRNA synthetase	ATP [cytoplasm] + L-tryptophan [cytoplasm] + tRNA(Trp), cytoplasmic [cytoplasm] -> AMP [cytoplasm] + diphosphate [cytoplasm] + Trp-tRNA(Trp) [cytoplasm]	YOL097C	0	Inf	0		9046085	R03664	YOL097C
r_1058	tryptophanyl-tRNA synthetase	ATP [mitochondrion] + L-tryptophan [mitochondrion] + tRNA(Trp), mitchondrial [mitochondrion] -> AMP [mitochondrion] + diphosphate [mitochondrion] + Trp-tRNA(Trp) [mitochondrion]	YDR268W	0	Inf	0		2999114	R03664	YDR268W
r_1063	tyrosine transaminase	3-(4-hydroxyphenyl)pyruvate [cytoplasm] + L-glutamate [cytoplasm] <=> 2-oxoglutarate [cytoplasm] + L-tyrosine [cytoplasm]	YGL202W	-Inf	Inf	0		9491082; 9491083	R00734	YGL202W
r_1065	tyrosine transaminase	3-(4-hydroxyphenyl)pyruvate [peroxisome] + L-glutamate [peroxisome] -> 2-oxoglutarate [peroxisome] + L-tyrosine [peroxisome]	YLR027C	0	Inf	0			R00734	YLR027C
r_1066	tyrosyl-tRNA synthetase	ATP [cytoplasm] + L-tyrosine [cytoplasm] + tRNA(Tyr), cytoplasmic [cytoplasm] -> AMP [cytoplasm] + diphosphate [cytoplasm] + Tyr-tRNA(Tyr) [cytoplasm]	YGR185C	0	Inf	0		8509419	R02918	YGR185C
r_1067	tyrosyl-tRNA synthetase	ATP [mitochondrion] + L-tyrosine [mitochondrion] + tRNA(Tyr), mitchondrial [mitochondrion] -> AMP [mitochondrion] + diphosphate [mitochondrion] + Tyr-tRNA(Tyr) [mitochondrion]	YPL097W	0	Inf	0		3315228	R02918	YPL097W
r_1068	UDP-glucose:ergosterol glucosyltransferase	ergosterol [cytoplasm] + UDP-D-glucose [cytoplasm] -> ergosterol 3-beta-D-glucoside [cytoplasm] + H+ [cytoplasm] + UDP [cytoplasm]	YLR189C	0	Inf	0		10224056		YLR189C
r_1069	UDP-N-acetylglucosamine diphosphorylase	H+ [cytoplasm] + N-acetyl-alpha-D-glucosamine 1-phosphate [cytoplasm] + UTP [cytoplasm] <=> diphosphate [cytoplasm] + UDP-N-acetyl-alpha-D-glucosamine [cytoplasm]	YDL103C	-Inf	Inf	0		16408321	R00416	YDL103C
r_1070	UDPglucose 4-epimerase	UDP-D-glucose [cytoplasm] <=> UDP-D-galactose [cytoplasm]	YBR019C	-Inf	Inf	0				YBR019C
r_1071	UDPglucose--hexose-1-phosphate uridylyltransferase	alpha-D-galactose 1-phosphate [cytoplasm] + UDP-D-glucose [cytoplasm] <=> D-glucose 1-phosphate [cytoplasm] + UDP-D-galactose [cytoplasm]	YBR018C	-Inf	Inf	0			R00955	YBR018C
r_1072	UMP kinase	ATP [cytoplasm] + UMP [cytoplasm] -> ADP [cytoplasm] + UDP [cytoplasm]	YKL024C	0	Inf	0			R00158	YKL024C
r_1073	UMP kinase	ATP [nucleus] + UMP [nucleus] -> ADP [nucleus] + UDP [nucleus]	YKL024C	0	Inf	0			R00158	YKL024C
r_1074	uracil phosphoribosyltransferase	PRPP [cytoplasm] + uracil [cytoplasm] -> diphosphate [cytoplasm] + UMP [cytoplasm]	YHR128W	0	Inf	0			R00966	YHR128W
r_1075	urea carboxylase	ATP [cytoplasm] + bicarbonate [cytoplasm] + urea [cytoplasm] -> ADP [cytoplasm] + H+ [cytoplasm] + phosphate [cytoplasm] + urea-1-carboxylic acid [cytoplasm]	YBR208C	0	Inf	0			R00774	YBR208C
r_1076	ureidoglycolate hydrolase	2 H+ [cytoplasm] + H2O [cytoplasm] + ureidoglycolic acid [cytoplasm] -> 2 ammonium [cytoplasm] + carbon dioxide [cytoplasm] + glyoxylate [cytoplasm]	YIR032C	0	Inf	0		1776360		YIR032C
r_1077	uridine kinase (ATP:uridine)	ATP [cytoplasm] + uridine [cytoplasm] -> ADP [cytoplasm] + H+ [cytoplasm] + UMP [cytoplasm]	YNR012W	0	Inf	0			R00964	YNR012W
r_1078	uridine kinase (GTP:uridine)	GTP [cytoplasm] + uridine [cytoplasm] -> GDP [cytoplasm] + H+ [cytoplasm] + UMP [cytoplasm]	YNR012W	0	Inf	0			R00968	YNR012W
r_1079	uridylate kinase (dUMP)	ATP [cytoplasm] + dUMP [cytoplasm] -> ADP [cytoplasm] + dUDP [cytoplasm]	YKL024C	0	Inf	0			R02098	YKL024C
r_1080	uridylate kinase (dUMP)	ATP [nucleus] + dUMP [nucleus] -> ADP [nucleus] + dUDP [nucleus]	YKL024C	0	Inf	0			R02098	YKL024C
r_1081	uroporphyrinogen decarboxylase (uroporphyrinogen III)	4 H+ [cytoplasm] + uroporphyrinogen III [cytoplasm] -> 4 carbon dioxide [cytoplasm] + coproporphyrinogen III [cytoplasm]	YDR047W	0	Inf	0			R03197	YDR047W
r_1082	uroporphyrinogen methyltransferase	2 S-adenosyl-L-methionine [cytoplasm] + uroporphyrinogen III [cytoplasm] -> H+ [cytoplasm] + precorrin-2 [cytoplasm] + 2 S-adenosyl-L-homocysteine [cytoplasm]	YKR069W	0	Inf	0			R03194	YKR069W
r_1083	uroporphyrinogen-III synthase	preuroporphyrinogen [cytoplasm] -> H2O [cytoplasm] + uroporphyrinogen III [cytoplasm]	YOR278W	0	Inf	0			R03165	YOR278W
r_1084	UTP-glucose-1-phosphate uridylyltransferase	D-glucose 1-phosphate [cytoplasm] + H+ [cytoplasm] + UTP [cytoplasm] <=> diphosphate [cytoplasm] + UDP-D-glucose [cytoplasm]	YKL035W	-Inf	Inf	0		7588797	R00289	YKL035W
r_1087	valine transaminase	2-oxoglutarate [cytoplasm] + L-valine [cytoplasm] <=> 3-methyl-2-oxobutanoate [cytoplasm] + L-glutamate [cytoplasm]	YJR148W	-Inf	Inf	0		9748245	R01214	YJR148W
r_1088	valine transaminase, mitochondiral	2-oxoglutarate [mitochondrion] + L-valine [mitochondrion] <=> 3-methyl-2-oxobutanoate [mitochondrion] + L-glutamate [mitochondrion]	YHR208W	-Inf	Inf	0		9748245	R01214	YHR208W
r_1089	valyl-tRNA synthetase	ATP [cytoplasm] + L-valine [cytoplasm] + tRNA(Val), cytoplasmic [cytoplasm] -> AMP [cytoplasm] + diphosphate [cytoplasm] + Val-tRNA(Val) [cytoplasm]	YGR094W	0	Inf	0		3294828	R03665	YGR094W
r_1090	valyl-tRNA synthetase	ATP [mitochondrion] + L-valine [mitochondrion] + tRNA(Val), mitchondrial [mitochondrion] -> AMP [mitochondrion] + diphosphate [mitochondrion] + Val-tRNA(Val) [mitochondrion]	YGR094W	0	Inf	0		3294828	R03665	YGR094W
r_1091	xanthine phosphoribosyltransferase	9H-xanthine [cytoplasm] + PRPP [cytoplasm] -> diphosphate [cytoplasm] + xanthosine-5-phosphate [cytoplasm]	YJR133W	0	Inf	0			R02142	YJR133W
r_1092	xylitol dehydrogenase (D-xyulose-forming)	NAD [cytoplasm] + xylitol [cytoplasm] -> D-xylulose [cytoplasm] + H+ [cytoplasm] + NADH [cytoplasm]	YLR070C	0	Inf	0			R01896	YLR070C
r_1093	xylose reductase	D-xylose [cytoplasm] + H+ [cytoplasm] + NADPH [cytoplasm] -> NADP(+) [cytoplasm] + xylitol [cytoplasm]	YHR104W	0	Inf	0			R01431	YHR104W
r_1094	xylulokinase	ATP [cytoplasm] + D-xylulose [cytoplasm] -> ADP [cytoplasm] + D-xylulose 5-phosphate [cytoplasm] + H+ [cytoplasm]	YGR194C	0	Inf	0			R01639	YGR194C
r_1095	yUMP synthetase	ribose-5-phosphate [cytoplasm] + uracil [cytoplasm] <=> H2O [cytoplasm] + pseudouridine 5'-phosphate [cytoplasm]	( YFL001W or YGL063W or YNL292W or YPL212C )	-Inf	Inf	0				[['YFL001W', 'YGL063W', 'YNL292W', 'YPL212C']]
r_1619	5'-nucleotidase (GMP)	GMP [cytoplasm] + H2O [cytoplasm] -> guanosine [cytoplasm] + phosphate [cytoplasm]	YER037W	0	Inf	0		23670538		YER037W
r_1838	homocitrate synthase	2-oxoglutarate [mitochondrion] + acetyl-CoA [mitochondrion] + H2O [mitochondrion] -> coenzyme A [mitochondrion] + H+ [mitochondrion] + homocitrate [mitochondrion]	( YDL131W or YDL182W )	0	Inf	0				[['YDL131W', 'YDL182W']]
r_2029	pyridoxine kinase	ATP [cytoplasm] + pyridoxine [cytoplasm] -> ADP [cytoplasm] + H+ [cytoplasm] + pyridoxine 5'-phosphate [cytoplasm]	YEL029C	0	Inf	0				YEL029C
r_2112	kynurenine aminotransferase	L-kynurenine [cytoplasm] + pyruvate [cytoplasm] <=> L-alanine [cytoplasm] + kynurenic acid [cytoplasm]	YJL060W	-Inf	Inf	0		18205391	R01959	YJL060W
r_2113	spontaneous kynurenic acid to quinaldic acid	kynurenic acid [cytoplasm] -> quinaldic acid [cytoplasm]		0	Inf	0		18205391		nan
r_2114	spontaneous 2-amino-3-carboxymuconate-6-semialdehyde to quinolinate	2-amino-3-carboxymuconate-6-semialdehyde [cytoplasm] -> H2O [cytoplasm] + quinolinate [cytoplasm]		0	Inf	0		18205391		nan
r_2115	alcohol dehydrogenase, (acetaldehyde to ethanol)	acetaldehyde [cytoplasm] + H+ [cytoplasm] + NADH [cytoplasm] -> ethanol [cytoplasm] + NAD [cytoplasm]	( YBR145W or YOL086C )	0	Inf	0		12499363	R00754	[['YBR145W', 'YOL086C']]
r_2116	acetaldehyde dehydrogenase	acetaldehyde [cytoplasm] + H2O [cytoplasm] + NAD [cytoplasm] -> acetate [cytoplasm] + H+ [cytoplasm] + NADH [cytoplasm]	YMR170C	0	Inf	0			R00711	YMR170C
r_2117	phenylalanine transaminase	L-phenylalanine [cytoplasm] + pyruvate [cytoplasm] <=> keto-phenylpyruvate [cytoplasm] + L-alanine [cytoplasm]	YHR137W	-Inf	Inf	0		9491082; 9491083	R00694	YHR137W
r_2118	tryptophan transaminase	keto-phenylpyruvate [cytoplasm] + L-tryptophan [cytoplasm] -> indole-3-pyruvate [cytoplasm] + L-phenylalanine [cytoplasm]	YHR137W	0	Inf	0		9491082; 9491083	R00684	YHR137W
r_2119	tyrosine transaminase	3-(4-hydroxyphenyl)pyruvate [cytoplasm] + L-alanine [cytoplasm] <=> L-tyrosine [cytoplasm] + pyruvate [cytoplasm]	YHR137W	-Inf	Inf	0		9491082; 9491083	R00734	YHR137W
r_2126	sedoheptulose bisphosphatase	sedoheptulose 1,7-bisphosphate [cytoplasm] -> phosphate [cytoplasm] + sedoheptulose 7-phosphate [cytoplasm]	YKR043C	0	Inf	0		21663798; 22672422	R01845	YKR043C
r_2131	isocitrate dehydrogenase	isocitrate [mitochondrion] + NADP(+) [mitochondrion] -> 2-oxoglutarate [mitochondrion] + carbon dioxide [mitochondrion] + NADPH [mitochondrion]	YDL066W	0	Inf	0		1989987; 8099357	R00267	YDL066W
r_2140	fatty-acyl-CoA synthase (n-C16:0CoA)	acetyl-CoA [cytoplasm] + 21 H+ [cytoplasm] + 7 malonyl-CoA [cytoplasm] + 14 NADPH [cytoplasm] -> 7 carbon dioxide [cytoplasm] + 7 coenzyme A [cytoplasm] + 7 H2O [cytoplasm] + 14 NADP(+) [cytoplasm] + palmitoyl-CoA [cytoplasm]	( YKL182W and YPL231W )	0	Inf	0		22345606		['YKL182W', 'YPL231W']
r_2141	fatty-acyl-CoA synthase (n-C18:0CoA)	acetyl-CoA [cytoplasm] + 24 H+ [cytoplasm] + 8 malonyl-CoA [cytoplasm] + 16 NADPH [cytoplasm] -> 8 carbon dioxide [cytoplasm] + 8 coenzyme A [cytoplasm] + 8 H2O [cytoplasm] + 16 NADP(+) [cytoplasm] + stearoyl-CoA [cytoplasm]	( YKL182W and YPL231W )	0	Inf	0		22345606		['YKL182W', 'YPL231W']
r_2142	B-ketoacyl-ACP synthase (acetoacetyl-ACP)	acetyl-ACP [mitochondrion] + carboxyacetyl-ACP [mitochondrion] + H+ [mitochondrion] -> carbon dioxide [mitochondrion] + ACP1 [mitochondrion] + acetoacetyl-ACP [mitochondrion]	( YER061C and YKL192C )	0	Inf	0		8412701		['YER061C', 'YKL192C']
r_2143	B-ketoacyl-ACP synthase (3-oxo-hexanoyl-ACP)	carboxyacetyl-ACP [mitochondrion] + H+ [mitochondrion] + butanoyl-ACP [mitochondrion] -> carbon dioxide [mitochondrion] + ACP1 [mitochondrion] + 3-oxo-hexanoyl-ACP [mitochondrion]	( YER061C and YKL192C )	0	Inf	0		8412701		['YER061C', 'YKL192C']
r_2144	B-ketoacyl-ACP synthase (3-oxo-octanoyl-ACP)	carboxyacetyl-ACP [mitochondrion] + H+ [mitochondrion] + hexanoyl-ACP [mitochondrion] -> carbon dioxide [mitochondrion] + ACP1 [mitochondrion] + 3-oxo-octanoyl-ACP [mitochondrion]	( YER061C and YKL192C )	0	Inf	0		8412701		['YER061C', 'YKL192C']
r_2145	3-oxoacyl-ACP reductase (3-hydroxybutanoyl-ACP)	H+ [mitochondrion] + NADPH [mitochondrion] + acetoacetyl-ACP [mitochondrion] -> NADP(+) [mitochondrion] + 3-hydroxybutanoyl-ACP [mitochondrion]	YKL055C	0	Inf	0		9388293		YKL055C
r_2146	3-oxoacyl-ACP reductase (3-hydroxyhexanoyl-ACP)	H+ [mitochondrion] + NADPH [mitochondrion] + 3-oxo-hexanoyl-ACP [mitochondrion] -> NADP(+) [mitochondrion] + 3-hydroxyhexanoyl-ACP [mitochondrion]	YKL055C	0	Inf	0		9388293		YKL055C
r_2147	3-oxoacyl-ACP reductase (3-hydroxyoctanoyl-ACP)	H+ [mitochondrion] + NADPH [mitochondrion] + 3-oxo-octanoyl-ACP [mitochondrion] -> NADP(+) [mitochondrion] + 3-hydroxyoctanoyl-ACP [mitochondrion]	YKL055C	0	Inf	0		9388293		YKL055C
r_2148	3-hydroxyacyl-thioester dehydratase (trans-but-2-enoyl-ACP)	3-hydroxybutanoyl-ACP [mitochondrion] <=> H2O [mitochondrion] + trans-but-2-enoyl-ACP [mitochondrion]	YHR067W	-Inf	Inf	0		15387819		YHR067W
r_2149	3-hydroxyacyl-thioester dehydratase (trans-hex-2-enoyl-ACP)	3-hydroxyhexanoyl-ACP [mitochondrion] <=> H2O [mitochondrion] + trans-hex-2-enoyl-ACP [mitochondrion]	YHR067W	-Inf	Inf	0		15387819		YHR067W
r_2150	3-hydroxyacyl-thioester dehydratase (trans-oct-2-enoyl-ACP)	3-hydroxyoctanoyl-ACP [mitochondrion] <=> H2O [mitochondrion] + trans-oct-2-enoyl-ACP [mitochondrion]	YHR067W	-Inf	Inf	0		15387819		YHR067W
r_2151	enoyl-ACP reductase (butanoyl-ACP)	H+ [mitochondrion] + NADPH [mitochondrion] + trans-but-2-enoyl-ACP [mitochondrion] -> NADP(+) [mitochondrion] + butanoyl-ACP [mitochondrion]	YBR026C	0	Inf	0		11509667		YBR026C
r_2152	enoyl-ACP reductase (hexanoyl-ACP)	H+ [mitochondrion] + NADPH [mitochondrion] + trans-hex-2-enoyl-ACP [mitochondrion] -> NADP(+) [mitochondrion] + hexanoyl-ACP [mitochondrion]	YBR026C	0	Inf	0		11509667		YBR026C
r_2153	enoyl-ACP reductase (octanoyl-ACP)	H+ [mitochondrion] + NADPH [mitochondrion] + trans-oct-2-enoyl-ACP [mitochondrion] -> NADP(+) [mitochondrion] + octanoyl-ACP [mitochondrion]	YBR026C	0	Inf	0		11509667		YBR026C
r_2154	elongase I (3-oxotetradecanoyl-CoA)	lauroyl-CoA [endoplasmic reticulum membrane] + malonyl-CoA [endoplasmic reticulum membrane] + H+ [endoplasmic reticulum membrane] -> carbon dioxide [endoplasmic reticulum membrane] + coenzyme A [endoplasmic reticulum membrane] + 3-oxotetradecanoyl-CoA [endoplasmic reticulum membrane]	YJL196C	0	Inf	0		22345606		YJL196C
r_2155	elongase I (3-oxopalmitoyl-CoA)	malonyl-CoA [endoplasmic reticulum membrane] + H+ [endoplasmic reticulum membrane] + myristoyl-CoA [endoplasmic reticulum membrane] -> carbon dioxide [endoplasmic reticulum membrane] + coenzyme A [endoplasmic reticulum membrane] + 3-oxopalmitoyl-CoA [endoplasmic reticulum membrane]	YJL196C	0	Inf	0		22345606		YJL196C
r_2156	elongase II (3-oxooctadecanoyl-CoA)	malonyl-CoA [endoplasmic reticulum membrane] + H+ [endoplasmic reticulum membrane] + palmitoyl-CoA [endoplasmic reticulum membrane] -> carbon dioxide [endoplasmic reticulum membrane] + coenzyme A [endoplasmic reticulum membrane] + 3-oxooctadecanoyl-CoA [endoplasmic reticulum membrane]	YCR034W	0	Inf	0		22345606		YCR034W
r_2157	elongase II or III (3-oxoicosanoyl-CoA)	malonyl-CoA [endoplasmic reticulum membrane] + H+ [endoplasmic reticulum membrane] + stearoyl-CoA [endoplasmic reticulum membrane] -> carbon dioxide [endoplasmic reticulum membrane] + coenzyme A [endoplasmic reticulum membrane] + 3-oxoicosanoyl-CoA [endoplasmic reticulum membrane]	( YCR034W or YLR372W )	0	Inf	0		22345606		[['YCR034W', 'YLR372W']]
r_2158	elongase II or III (3-oxodocosanoyl-CoA)	malonyl-CoA [endoplasmic reticulum membrane] + H+ [endoplasmic reticulum membrane] + icosanoyl-CoA [endoplasmic reticulum membrane] -> carbon dioxide [endoplasmic reticulum membrane] + coenzyme A [endoplasmic reticulum membrane] + 3-oxodocosanoyl-CoA [endoplasmic reticulum membrane]	( YCR034W or YLR372W )	0	Inf	0		22345606		[['YCR034W', 'YLR372W']]
r_2159	elongase II or III (3-oxotetracosanoyl-CoA)	malonyl-CoA [endoplasmic reticulum membrane] + H+ [endoplasmic reticulum membrane] + docosanoyl-CoA [endoplasmic reticulum membrane] -> carbon dioxide [endoplasmic reticulum membrane] + coenzyme A [endoplasmic reticulum membrane] + 3-oxotetracosanoyl-CoA [endoplasmic reticulum membrane]	( YCR034W or YLR372W )	0	Inf	0		22345606		[['YCR034W', 'YLR372W']]
r_2160	elongase III (3-oxohexacosanoyl-CoA)	malonyl-CoA [endoplasmic reticulum membrane] + H+ [endoplasmic reticulum membrane] + tetracosanoyl-CoA [endoplasmic reticulum membrane] -> carbon dioxide [endoplasmic reticulum membrane] + coenzyme A [endoplasmic reticulum membrane] + 3-oxohexacosanoyl-CoA [endoplasmic reticulum membrane]	YLR372W	0	Inf	0		22345606		YLR372W
r_2161	B-ketoacyl-CoA reductase ((S)-3-hydroxytetradecanoyl-CoA)	H+ [endoplasmic reticulum membrane] + 3-oxotetradecanoyl-CoA [endoplasmic reticulum membrane] + NADPH [endoplasmic reticulum membrane] -> NADP(+) [endoplasmic reticulum membrane] + (S)-3-hydroxytetradecanoyl-CoA [endoplasmic reticulum membrane]	YBR159W	0	Inf	0		22345606		YBR159W
r_2162	B-ketoacyl-CoA reductase ((S)-3-hydroxypalmitoyl-CoA)	H+ [endoplasmic reticulum membrane] + 3-oxopalmitoyl-CoA [endoplasmic reticulum membrane] + NADPH [endoplasmic reticulum membrane] -> NADP(+) [endoplasmic reticulum membrane] + (S)-3-hydroxypalmitoyl-CoA [endoplasmic reticulum membrane]	YBR159W	0	Inf	0		22345606		YBR159W
r_2163	B-ketoacyl-CoA reductase (3-hydroxyoctadecanoyl-CoA)	H+ [endoplasmic reticulum membrane] + 3-oxooctadecanoyl-CoA [endoplasmic reticulum membrane] + NADPH [endoplasmic reticulum membrane] -> NADP(+) [endoplasmic reticulum membrane] + 3-hydroxyoctadecanoyl-CoA [endoplasmic reticulum membrane]	YBR159W	0	Inf	0		22345606		YBR159W
r_2164	B-ketoacyl-CoA reductase (3-hydroxyicosanoyl-CoA)	H+ [endoplasmic reticulum membrane] + 3-oxoicosanoyl-CoA [endoplasmic reticulum membrane] + NADPH [endoplasmic reticulum membrane] -> NADP(+) [endoplasmic reticulum membrane] + 3-hydroxyicosanoyl-CoA [endoplasmic reticulum membrane]	YBR159W	0	Inf	0		22345606		YBR159W
r_2165	B-ketoacyl-CoA reductase (3-hydroxydocosanoyl-CoA)	H+ [endoplasmic reticulum membrane] + 3-oxodocosanoyl-CoA [endoplasmic reticulum membrane] + NADPH [endoplasmic reticulum membrane] -> NADP(+) [endoplasmic reticulum membrane] + 3-hydroxydocosanoyl-CoA [endoplasmic reticulum membrane]	YBR159W	0	Inf	0		22345606		YBR159W
r_2166	B-ketoacyl-CoA reductase (3-hydroxytetracosanoyl-CoA)	H+ [endoplasmic reticulum membrane] + 3-oxotetracosanoyl-CoA [endoplasmic reticulum membrane] + NADPH [endoplasmic reticulum membrane] -> NADP(+) [endoplasmic reticulum membrane] + 3-hydroxytetracosanoyl-CoA [endoplasmic reticulum membrane]	YBR159W	0	Inf	0		22345606		YBR159W
r_2167	B-ketoacyl-CoA reductase ((S)-3-hydroxyhexacosanoyl-CoA)	H+ [endoplasmic reticulum membrane] + 3-oxohexacosanoyl-CoA [endoplasmic reticulum membrane] + NADPH [endoplasmic reticulum membrane] -> NADP(+) [endoplasmic reticulum membrane] + (S)-3-hydroxyhexacosanoyl-CoA [endoplasmic reticulum membrane]	YBR159W	0	Inf	0		22345606		YBR159W
r_2168	B-hydroxyacyl-CoA dehydratase (trans-tetradec-2-enoyl-CoA)	(S)-3-hydroxytetradecanoyl-CoA [endoplasmic reticulum membrane] <=> H2O [endoplasmic reticulum membrane] + trans-tetradec-2-enoyl-CoA [endoplasmic reticulum membrane]	YJL097W	-Inf	Inf	0		22345606		YJL097W
r_2169	B-hydroxyacyl-CoA dehydratase (trans-hexadec-2-enoyl-CoA)	(S)-3-hydroxypalmitoyl-CoA [endoplasmic reticulum membrane] <=> H2O [endoplasmic reticulum membrane] + trans-hexadec-2-enoyl-CoA [endoplasmic reticulum membrane]	YJL097W	-Inf	Inf	0		22345606		YJL097W
r_2170	B-hydroxyacyl-CoA dehydratase (trans-octadec-2-enoyl-CoA)	3-hydroxyoctadecanoyl-CoA [endoplasmic reticulum membrane] <=> H2O [endoplasmic reticulum membrane] + trans-octadec-2-enoyl-CoA [endoplasmic reticulum membrane]	YJL097W	-Inf	Inf	0		22345606		YJL097W
r_2171	B-hydroxyacyl-CoA dehydratase (trans-icos-2-enoyl-CoA)	3-hydroxyicosanoyl-CoA [endoplasmic reticulum membrane] <=> H2O [endoplasmic reticulum membrane] + trans-icos-2-enoyl-CoA [endoplasmic reticulum membrane]	YJL097W	-Inf	Inf	0		22345606		YJL097W
r_2172	B-hydroxyacyl-CoA dehydratase (trans-docos-2-enoyl-CoA)	3-hydroxydocosanoyl-CoA [endoplasmic reticulum membrane] <=> H2O [endoplasmic reticulum membrane] + trans-docos-2-enoyl-CoA [endoplasmic reticulum membrane]	YJL097W	-Inf	Inf	0		22345606		YJL097W
r_2173	B-hydroxyacyl-CoA dehydratase (trans-tetracos-2-enoyl-CoA)	3-hydroxytetracosanoyl-CoA [endoplasmic reticulum membrane] <=> H2O [endoplasmic reticulum membrane] + trans-tetracos-2-enoyl-CoA [endoplasmic reticulum membrane]	YJL097W	-Inf	Inf	0		22345606		YJL097W
r_2174	B-hydroxyacyl-CoA dehydratase (trans-hexacos-2-enoyl-CoA)	(S)-3-hydroxyhexacosanoyl-CoA [endoplasmic reticulum membrane] <=> H2O [endoplasmic reticulum membrane] + trans-hexacos-2-enoyl-CoA [endoplasmic reticulum membrane]	YJL097W	-Inf	Inf	0		22345606		YJL097W
r_2175	trans-2-enoyl-CoA reductase (n-C14:0CoA)	H+ [endoplasmic reticulum membrane] + NADPH [endoplasmic reticulum membrane] + trans-tetradec-2-enoyl-CoA [endoplasmic reticulum membrane] -> myristoyl-CoA [endoplasmic reticulum membrane] + NADP(+) [endoplasmic reticulum membrane]	YDL015C	0	Inf	0		22345606		YDL015C
r_2176	trans-2-enoyl-CoA reductase (n-C16:0CoA)	H+ [endoplasmic reticulum membrane] + NADPH [endoplasmic reticulum membrane] + trans-hexadec-2-enoyl-CoA [endoplasmic reticulum membrane] -> palmitoyl-CoA [endoplasmic reticulum membrane] + NADP(+) [endoplasmic reticulum membrane]	YDL015C	0	Inf	0		22345606		YDL015C
r_2177	trans-2-enoyl-CoA reductase (n-C18:0CoA)	H+ [endoplasmic reticulum membrane] + NADPH [endoplasmic reticulum membrane] + trans-octadec-2-enoyl-CoA [endoplasmic reticulum membrane] -> stearoyl-CoA [endoplasmic reticulum membrane] + NADP(+) [endoplasmic reticulum membrane]	YDL015C	0	Inf	0		22345606		YDL015C
r_2178	trans-2-enoyl-CoA reductase (n-C20:0CoA)	H+ [endoplasmic reticulum membrane] + NADPH [endoplasmic reticulum membrane] + trans-icos-2-enoyl-CoA [endoplasmic reticulum membrane] -> icosanoyl-CoA [endoplasmic reticulum membrane] + NADP(+) [endoplasmic reticulum membrane]	YDL015C	0	Inf	0		22345606		YDL015C
r_2179	trans-2-enoyl-CoA reductase (n-C22:0CoA)	H+ [endoplasmic reticulum membrane] + NADPH [endoplasmic reticulum membrane] + trans-docos-2-enoyl-CoA [endoplasmic reticulum membrane] -> docosanoyl-CoA [endoplasmic reticulum membrane] + NADP(+) [endoplasmic reticulum membrane]	YDL015C	0	Inf	0		22345606		YDL015C
r_2180	trans-2-enoyl-CoA reductase (n-C24:0CoA)	H+ [endoplasmic reticulum membrane] + NADPH [endoplasmic reticulum membrane] + trans-tetracos-2-enoyl-CoA [endoplasmic reticulum membrane] -> tetracosanoyl-CoA [endoplasmic reticulum membrane] + NADP(+) [endoplasmic reticulum membrane]	YDL015C	0	Inf	0		22345606		YDL015C
r_2181	trans-2-enoyl-CoA reductase (n-C26:0CoA)	H+ [endoplasmic reticulum membrane] + NADPH [endoplasmic reticulum membrane] + trans-hexacos-2-enoyl-CoA [endoplasmic reticulum membrane] -> NADP(+) [endoplasmic reticulum membrane] + hexacosanoyl-CoA [endoplasmic reticulum membrane]	YDL015C	0	Inf	0		22345606		YDL015C
r_2182	palmitoyl-CoA desaturase (n-C16:0CoA -> n-C16:1CoA), ER membrane	H+ [endoplasmic reticulum membrane] + palmitoyl-CoA [endoplasmic reticulum membrane] + oxygen [endoplasmic reticulum membrane] + NADH [endoplasmic reticulum membrane] -> 2 H2O [endoplasmic reticulum membrane] + palmitoleoyl-CoA [endoplasmic reticulum membrane] + NAD [endoplasmic reticulum membrane]	YGL055W	0	Inf	0		22345606		YGL055W
r_2183	stearoyl-CoA desaturase (n-C18:0CoA -> n-C18:1CoA), ER membrane	H+ [endoplasmic reticulum membrane] + stearoyl-CoA [endoplasmic reticulum membrane] + oxygen [endoplasmic reticulum membrane] + NADH [endoplasmic reticulum membrane] -> 2 H2O [endoplasmic reticulum membrane] + NAD [endoplasmic reticulum membrane] + oleoyl-CoA [endoplasmic reticulum membrane]	YGL055W	0	Inf	0		22345606		YGL055W
r_2194	fatty-acid--CoA ligase (dodecanoate), ER membrane	coenzyme A [endoplasmic reticulum membrane] + ATP [endoplasmic reticulum membrane] + laurate [endoplasmic reticulum membrane] <=> lauroyl-CoA [endoplasmic reticulum membrane] + AMP [endoplasmic reticulum membrane] + diphosphate [endoplasmic reticulum membrane]	YOR317W	-Inf	Inf	0		22345606		YOR317W
r_2195	fatty-acid--CoA ligase (tetradecanoate), ER membrane	coenzyme A [endoplasmic reticulum membrane] + ATP [endoplasmic reticulum membrane] + myristate [endoplasmic reticulum membrane] <=> myristoyl-CoA [endoplasmic reticulum membrane] + AMP [endoplasmic reticulum membrane] + diphosphate [endoplasmic reticulum membrane]	( YMR246W or YOR317W )	-Inf	Inf	0		22345606		[['YMR246W', 'YOR317W']]
r_2196	fatty-acid--CoA ligase (hexadecanoate), ER membrane	coenzyme A [endoplasmic reticulum membrane] + ATP [endoplasmic reticulum membrane] + palmitate [endoplasmic reticulum membrane] <=> palmitoyl-CoA [endoplasmic reticulum membrane] + AMP [endoplasmic reticulum membrane] + diphosphate [endoplasmic reticulum membrane]	( YMR246W or YOR317W )	-Inf	Inf	0		22345606		[['YMR246W', 'YOR317W']]
r_2197	fatty-acid--CoA ligase (hexadecenoate), ER membrane	coenzyme A [endoplasmic reticulum membrane] + ATP [endoplasmic reticulum membrane] + palmitoleate [endoplasmic reticulum membrane] <=> palmitoleoyl-CoA [endoplasmic reticulum membrane] + AMP [endoplasmic reticulum membrane] + diphosphate [endoplasmic reticulum membrane]	( YMR246W or YOR317W )	-Inf	Inf	0		22345606		[['YMR246W', 'YOR317W']]
r_2198	fatty-acid--CoA ligase (octadecanoate), ER membrane	coenzyme A [endoplasmic reticulum membrane] + ATP [endoplasmic reticulum membrane] + stearate [endoplasmic reticulum membrane] <=> stearoyl-CoA [endoplasmic reticulum membrane] + AMP [endoplasmic reticulum membrane] + diphosphate [endoplasmic reticulum membrane]	( YMR246W or YOR317W )	-Inf	Inf	0		22345606		[['YMR246W', 'YOR317W']]
r_2199	fatty-acid--CoA ligase (octadecenoate), ER membrane	coenzyme A [endoplasmic reticulum membrane] + ATP [endoplasmic reticulum membrane] + oleate [endoplasmic reticulum membrane] <=> oleoyl-CoA [endoplasmic reticulum membrane] + AMP [endoplasmic reticulum membrane] + diphosphate [endoplasmic reticulum membrane]	( YMR246W or YOR317W )	-Inf	Inf	0		22345606		[['YMR246W', 'YOR317W']]
r_2200	fatty-acid--CoA ligase (dodecanoate), lipid particle	coenzyme A [lipid particle] + ATP [lipid particle] + laurate [lipid particle] <=> diphosphate [lipid particle] + AMP [lipid particle] + lauroyl-CoA [lipid particle]	YOR317W	-Inf	Inf	0		22345606		YOR317W
r_2201	fatty-acid--CoA ligase (tetradecanoate), lipid particle	coenzyme A [lipid particle] + ATP [lipid particle] + myristate [lipid particle] <=> diphosphate [lipid particle] + AMP [lipid particle] + myristoyl-CoA [lipid particle]	( YMR246W or YOR317W )	-Inf	Inf	0		22345606		[['YMR246W', 'YOR317W']]
r_2202	fatty-acid--CoA ligase (hexadecanoate), lipid particle	coenzyme A [lipid particle] + ATP [lipid particle] + palmitate [lipid particle] <=> diphosphate [lipid particle] + AMP [lipid particle] + palmitoyl-CoA [lipid particle]	( YMR246W or YOR317W )	-Inf	Inf	0		22345606		[['YMR246W', 'YOR317W']]
r_2203	fatty-acid--CoA ligase (hexadecenoate), lipid particle	coenzyme A [lipid particle] + ATP [lipid particle] + palmitoleate [lipid particle] <=> diphosphate [lipid particle] + AMP [lipid particle] + palmitoleoyl-CoA [lipid particle]	( YMR246W or YOR317W )	-Inf	Inf	0		22345606		[['YMR246W', 'YOR317W']]
r_2204	fatty-acid--CoA ligase (octadecanoate), lipid particle	coenzyme A [lipid particle] + ATP [lipid particle] + stearate [lipid particle] <=> diphosphate [lipid particle] + AMP [lipid particle] + stearoyl-CoA [lipid particle]	( YMR246W or YOR317W )	-Inf	Inf	0		22345606		[['YMR246W', 'YOR317W']]
r_2205	fatty-acid--CoA ligase (octadecenoate), lipid particle	coenzyme A [lipid particle] + ATP [lipid particle] + oleate [lipid particle] <=> diphosphate [lipid particle] + AMP [lipid particle] + oleoyl-CoA [lipid particle]	( YMR246W or YOR317W )	-Inf	Inf	0		22345606		[['YMR246W', 'YOR317W']]
r_2206	fatty-acid--CoA ligase (hexadecenoate), peroxisome	ATP [peroxisome] + coenzyme A [peroxisome] + palmitoleate [peroxisome] <=> AMP [peroxisome] + diphosphate [peroxisome] + palmitoleoyl-CoA [peroxisome]	YER015W	-Inf	Inf	0		22345606		YER015W
r_2207	fatty-acid--CoA ligase (octadecanoate), peroxisome	ATP [peroxisome] + coenzyme A [peroxisome] + stearate [peroxisome] <=> AMP [peroxisome] + diphosphate [peroxisome] + stearoyl-CoA [peroxisome]	YER015W	-Inf	Inf	0		22345606		YER015W
r_2208	fatty-acid--CoA ligase (octadecenoate), peroxisome	ATP [peroxisome] + coenzyme A [peroxisome] + oleate [peroxisome] <=> AMP [peroxisome] + diphosphate [peroxisome] + oleoyl-CoA [peroxisome]	YER015W	-Inf	Inf	0		22345606		YER015W
r_2209	fatty-acid--CoA ligase (arachidate), cell envelope	ATP [cell envelope] + coenzyme A [cell envelope] + arachidate [cell envelope] <=> AMP [cell envelope] + diphosphate [cell envelope] + icosanoyl-CoA [cell envelope]	YIL009W	-Inf	Inf	0		22345606		YIL009W
r_2210	fatty-acid--CoA ligase (behenate), cell envelope	ATP [cell envelope] + coenzyme A [cell envelope] + behenate [cell envelope] <=> AMP [cell envelope] + diphosphate [cell envelope] + docosanoyl-CoA [cell envelope]	YIL009W	-Inf	Inf	0		22345606		YIL009W
r_2211	fatty-acid--CoA ligase (lignoceric acid), cell envelope	ATP [cell envelope] + coenzyme A [cell envelope] + lignoceric acid [cell envelope] <=> AMP [cell envelope] + diphosphate [cell envelope] + tetracosanoyl-CoA [cell envelope]	YIL009W	-Inf	Inf	0		22345606		YIL009W
r_2212	fatty-acid--CoA ligase (cerotic acid), cell envelope	ATP [cell envelope] + coenzyme A [cell envelope] + cerotic acid [cell envelope] <=> AMP [cell envelope] + diphosphate [cell envelope] + hexacosanoyl-CoA [cell envelope]	YIL009W	-Inf	Inf	0		22345606		YIL009W
r_2213	fatty-acid--CoA ligase (behenate), ER membrane	coenzyme A [endoplasmic reticulum membrane] + ATP [endoplasmic reticulum membrane] + behenate [endoplasmic reticulum membrane] <=> docosanoyl-CoA [endoplasmic reticulum membrane] + AMP [endoplasmic reticulum membrane] + diphosphate [endoplasmic reticulum membrane]	YBR041W	-Inf	Inf	0		22345606		YBR041W
r_2214	fatty-acid--CoA ligase (lignoceric acid), ER membrane	coenzyme A [endoplasmic reticulum membrane] + ATP [endoplasmic reticulum membrane] + lignoceric acid [endoplasmic reticulum membrane] <=> tetracosanoyl-CoA [endoplasmic reticulum membrane] + AMP [endoplasmic reticulum membrane] + diphosphate [endoplasmic reticulum membrane]	YBR041W	-Inf	Inf	0		22345606		YBR041W
r_2215	fatty-acid--CoA ligase (cerotic acid), ER membrane	coenzyme A [endoplasmic reticulum membrane] + ATP [endoplasmic reticulum membrane] + cerotic acid [endoplasmic reticulum membrane] <=> hexacosanoyl-CoA [endoplasmic reticulum membrane] + AMP [endoplasmic reticulum membrane] + diphosphate [endoplasmic reticulum membrane]	YBR041W	-Inf	Inf	0		22345606		YBR041W
r_2216	fatty-acid--CoA ligase (behenate), lipid particle	coenzyme A [lipid particle] + ATP [lipid particle] + behenate [lipid particle] <=> diphosphate [lipid particle] + AMP [lipid particle] + docosanoyl-CoA [lipid particle]	YBR041W	-Inf	Inf	0		22345606		YBR041W
r_2217	fatty-acid--CoA ligase (lignoceric acid), lipid particle	coenzyme A [lipid particle] + ATP [lipid particle] + lignoceric acid [lipid particle] <=> diphosphate [lipid particle] + AMP [lipid particle] + tetracosanoyl-CoA [lipid particle]	YBR041W	-Inf	Inf	0		22345606		YBR041W
r_2218	fatty-acid--CoA ligase (cerotic acid), lipid particle	coenzyme A [lipid particle] + ATP [lipid particle] + cerotic acid [lipid particle] <=> diphosphate [lipid particle] + AMP [lipid particle] + hexacosanoyl-CoA [lipid particle]	YBR041W	-Inf	Inf	0		22345606		YBR041W
r_2232	peroxisomal acyl-CoA thioesterase (4:0)	H2O [peroxisome] + butanoyl-CoA [peroxisome] -> coenzyme A [peroxisome] + H+ [peroxisome] + butyrate [peroxisome]	YJR019C	0	Inf	0		16490786		YJR019C
r_2233	peroxisomal acyl-CoA thioesterase (6:0)	H2O [peroxisome] + hexanoyl-CoA [peroxisome] -> coenzyme A [peroxisome] + H+ [peroxisome] + hexanoate [peroxisome]	YJR019C	0	Inf	0		16490786		YJR019C
r_2234	peroxisomal acyl-CoA thioesterase (16:1)	H2O [peroxisome] + palmitoleoyl-CoA [peroxisome] -> coenzyme A [peroxisome] + H+ [peroxisome] + palmitoleate [peroxisome]	YJR019C	0	Inf	0		16490786		YJR019C
r_2235	peroxisomal acyl-CoA thioesterase (18:1)	H2O [peroxisome] + oleoyl-CoA [peroxisome] -> coenzyme A [peroxisome] + H+ [peroxisome] + oleate [peroxisome]	YJR019C	0	Inf	0		16490786		YJR019C
r_2236	acyl-CoA oxidase (butanoyl-CoA)	oxygen [peroxisome] + butanoyl-CoA [peroxisome] -> hydrogen peroxide [peroxisome] + trans-but-2-enoyl-CoA [peroxisome]	YGL205W	0	Inf	0		12697341		YGL205W
r_2237	acyl-CoA oxidase (hexanoyl-CoA)	oxygen [peroxisome] + hexanoyl-CoA [peroxisome] -> hydrogen peroxide [peroxisome] + trans-hex-2-enoyl-CoA [peroxisome]	YGL205W	0	Inf	0		12697341		YGL205W
r_2238	acyl-CoA oxidase (octanoyl-CoA)	octanoyl-CoA [peroxisome] + oxygen [peroxisome] -> hydrogen peroxide [peroxisome] + trans-oct-2-enoyl-CoA [peroxisome]	YGL205W	0	Inf	0		12697341		YGL205W
r_2239	acyl-CoA oxidase (icosanoyl-CoA)	oxygen [peroxisome] + icosanoyl-CoA [peroxisome] -> hydrogen peroxide [peroxisome] + trans-icos-2-enoyl-CoA [peroxisome]	YGL205W	0	Inf	0		12697341		YGL205W
r_2240	acyl-CoA oxidase (docosanoyl-CoA)	oxygen [peroxisome] + docosanoyl-CoA [peroxisome] -> hydrogen peroxide [peroxisome] + trans-docos-2-enoyl-CoA [peroxisome]	YGL205W	0	Inf	0		12697341		YGL205W
r_2241	acyl-CoA oxidase (tetracosanoyl-CoA)	oxygen [peroxisome] + tetracosanoyl-CoA [peroxisome] -> hydrogen peroxide [peroxisome] + trans-tetracos-2-enoyl-CoA [peroxisome]	YGL205W	0	Inf	0		12697341		YGL205W
r_2242	acyl-CoA oxidase (palmitoleoyl-CoA)	oxygen [peroxisome] + palmitoleoyl-CoA [peroxisome] -> hydrogen peroxide [peroxisome] + trans-2,cis-9-hexadecadienoyl-CoA [peroxisome]	YGL205W	0	Inf	0		12697341		YGL205W
r_2243	acyl-CoA oxidase (cis-tetradec-7-enoyl-CoA)	oxygen [peroxisome] + cis-tetradec-7-enoyl-CoA [peroxisome] -> hydrogen peroxide [peroxisome] + trans-2,cis-7-tetradecadienoyl-CoA [peroxisome]	YGL205W	0	Inf	0		12697341		YGL205W
r_2244	acyl-CoA oxidase (cis-dodec-5-enoyl-CoA)	oxygen [peroxisome] + cis-dodec-5-enoyl-CoA [peroxisome] -> hydrogen peroxide [peroxisome] + trans-2,cis-5-dodecadienoyl-CoA [peroxisome]	YGL205W	0	Inf	0		12697341		YGL205W
r_2245	acyl-CoA oxidase (oleoyl-CoA)	oleoyl-CoA [peroxisome] + oxygen [peroxisome] -> hydrogen peroxide [peroxisome] + trans-2,cis-9-octadecadienoyl-CoA [peroxisome]	YGL205W	0	Inf	0		12697341		YGL205W
r_2246	acyl-CoA oxidase (cis-hexadec-7-enoyl-CoA)	oxygen [peroxisome] + cis-hexadec-7-enoyl-CoA [peroxisome] -> hydrogen peroxide [peroxisome] + trans-2,cis-7-hexadecadienoyl-CoA [peroxisome]	YGL205W	0	Inf	0		12697341		YGL205W
r_2247	acyl-CoA oxidase (cis-tetradec-5-enoyl-CoA)	oxygen [peroxisome] + cis-tetradec-5-enoyl-CoA [peroxisome] -> hydrogen peroxide [peroxisome] + trans-2,cis-5-tetradecadienoyl-CoA [peroxisome]	YGL205W	0	Inf	0		12697341		YGL205W
r_2248	2-enoyl-CoA hydratase (3-hydroxydecanoyl-CoA)	H2O [peroxisome] + trans-dec-2-enoyl-CoA [peroxisome] -> (R)-3-hydroxydecanoyl-CoA [peroxisome]	YKR009C	0	Inf	0		12697341		YKR009C
r_2249	2-enoyl-CoA hydratase (3-hydroxydodecanoyl-CoA)	H2O [peroxisome] + trans-dodec-2-enoyl-CoA [peroxisome] -> (R)-3-hydroxylauroyl-CoA [peroxisome]	YKR009C	0	Inf	0		12697341		YKR009C
r_2250	2-enoyl-CoA hydratase (3-hydroxytetradecanoyl-CoA)	H2O [peroxisome] + trans-tetradec-2-enoyl-CoA [peroxisome] -> (S)-3-hydroxytetradecanoyl-CoA [peroxisome]	YKR009C	0	Inf	0		12697341		YKR009C
r_2251	2-enoyl-CoA hydratase (3-hydroxyhexadecanoyl-CoA)	H2O [peroxisome] + hexadec-2-enoyl-CoA [peroxisome] -> (S)-3-hydroxypalmitoyl-CoA [peroxisome]	YKR009C	0	Inf	0		12697341		YKR009C
r_2252	2-enoyl-CoA hydratase (3-hydroxyoctadecanoyl-CoA)	H2O [peroxisome] + trans-octadec-2-enoyl-CoA [peroxisome] -> 3-hydroxyoctadecanoyl-CoA [peroxisome]	YKR009C	0	Inf	0		12697341		YKR009C
r_2253	2-enoyl-CoA hydratase (3-hydroxyhexacosanoyl-CoA)	H2O [peroxisome] + trans-hexacos-2-enoyl-CoA [peroxisome] -> (S)-3-hydroxyhexacosanoyl-CoA [peroxisome]	YKR009C	0	Inf	0		12697341		YKR009C
r_2254	2-enoyl-CoA hydratase (3-hydroxybutanoyl-CoA)	H2O [peroxisome] + trans-but-2-enoyl-CoA [peroxisome] -> (R)-3-hydroxybutanoyl-CoA [peroxisome]	YKR009C	0	Inf	0		12697341		YKR009C
r_2255	2-enoyl-CoA hydratase (3-hydroxyhexanoyl-CoA)	H2O [peroxisome] + trans-hex-2-enoyl-CoA [peroxisome] -> (R)-3-hydroxyhexanoyl-CoA [peroxisome]	YKR009C	0	Inf	0		12697341		YKR009C
r_2256	2-enoyl-CoA hydratase (3-hydroxyoctanoyl-CoA)	H2O [peroxisome] + trans-oct-2-enoyl-CoA [peroxisome] -> (R)-3-hydroxyoctanoyl-CoA [peroxisome]	YKR009C	0	Inf	0		12697341		YKR009C
r_2257	2-enoyl-CoA hydratase (3-hydroxyicosanoyl-CoA)	H2O [peroxisome] + trans-icos-2-enoyl-CoA [peroxisome] -> (R)-3-hydroxyicosanoyl-CoA [peroxisome]	YKR009C	0	Inf	0		12697341		YKR009C
r_2258	2-enoyl-CoA hydratase (3-hydroxydocosanoyl-CoA)	H2O [peroxisome] + trans-docos-2-enoyl-CoA [peroxisome] -> (R)-3-hydroxydocosanoyl-CoA [peroxisome]	YKR009C	0	Inf	0		12697341		YKR009C
r_2259	2-enoyl-CoA hydratase (3-hydroxytetracosanoyl-CoA)	H2O [peroxisome] + trans-tetracos-2-enoyl-CoA [peroxisome] -> (R)-3-hydroxytetracosanoyl-CoA [peroxisome]	YKR009C	0	Inf	0		12697341		YKR009C
r_2260	2-enoyl-CoA hydratase (3-hydroxy-cis-hexadec-9-enoyl-CoA)	H2O [peroxisome] + trans-2,cis-9-hexadecadienoyl-CoA [peroxisome] -> (R)-3-hydroxy-cis-hexadec-9-enoyl-CoA [peroxisome]	YKR009C	0	Inf	0		12697341		YKR009C
r_2261	2-enoyl-CoA hydratase (3-hydroxy-cis-tetradec-7-enoyl-CoA)	H2O [peroxisome] + trans-2,cis-7-tetradecadienoyl-CoA [peroxisome] -> (R)-3-hydroxy-cis-tetradec-7-enoyl-CoA [peroxisome]	YKR009C	0	Inf	0		12697341		YKR009C
r_2262	2-enoyl-CoA hydratase (3-hydroxy-cis-dodec-5-enoyl-CoA)	H2O [peroxisome] + trans-2,cis-5-dodecadienoyl-CoA [peroxisome] -> (R)-3-hydroxy-cis-dodec-5-enoyl-CoA [peroxisome]	YKR009C	0	Inf	0		12697341		YKR009C
r_2263	2-enoyl-CoA hydratase (3-hydroxy-cis-octadec-9-enoyl-CoA)	H2O [peroxisome] + trans-2,cis-9-octadecadienoyl-CoA [peroxisome] -> (R)-3-hydroxy-cis-octadec-9-enoyl-CoA [peroxisome]	YKR009C	0	Inf	0		12697341		YKR009C
r_2264	2-enoyl-CoA hydratase (3-hydroxy-cis-hexadec-7-enoyl-CoA)	H2O [peroxisome] + trans-2,cis-7-hexadecadienoyl-CoA [peroxisome] -> (R)-3-hydroxy-cis-hexadec-7-enoyl-CoA [peroxisome]	YKR009C	0	Inf	0		12697341		YKR009C
r_2265	2-enoyl-CoA hydratase (3-hydroxy-cis-tetradec-5-enoyl-CoA)	H2O [peroxisome] + trans-2,cis-5-tetradecadienoyl-CoA [peroxisome] -> (R)-3-hydroxy-cis-tetradec-5-enoyl-CoA [peroxisome]	YKR009C	0	Inf	0		12697341		YKR009C
r_2266	3-hydroxyacyl-CoA dehydrogenase (3-oxodecanoyl-CoA)	(R)-3-hydroxydecanoyl-CoA [peroxisome] + NAD [peroxisome] -> 3-oxodecanoyl-CoA [peroxisome] + H+ [peroxisome] + NADH [peroxisome]	YKR009C	0	Inf	0		12697341		YKR009C
r_2267	3-hydroxyacyl-CoA dehydrogenase (3-oxododecanoyl-CoA)	(R)-3-hydroxylauroyl-CoA [peroxisome] + NAD [peroxisome] -> 3-oxolauroyl-CoA [peroxisome] + H+ [peroxisome] + NADH [peroxisome]	YKR009C	0	Inf	0		12697341		YKR009C
r_2268	3-hydroxyacyl-CoA dehydrogenase (3-oxohexadecanoyl-CoA)	(S)-3-hydroxypalmitoyl-CoA [peroxisome] + NAD [peroxisome] -> 3-oxopalmitoyl-CoA [peroxisome] + H+ [peroxisome] + NADH [peroxisome]	YKR009C	0	Inf	0		12697341		YKR009C
r_2269	3-hydroxyacyl-CoA dehydrogenase (3-oxooctadecanoyl-CoA)	3-hydroxyoctadecanoyl-CoA [peroxisome] + NAD [peroxisome] -> 3-oxooctadecanoyl-CoA [peroxisome] + H+ [peroxisome] + NADH [peroxisome]	YKR009C	0	Inf	0		12697341		YKR009C
r_2270	3-hydroxyacyl-CoA dehydrogenase (3-oxohexacosanoyl-CoA)	(S)-3-hydroxyhexacosanoyl-CoA [peroxisome] + NAD [peroxisome] -> 3-oxohexacosanoyl-CoA [peroxisome] + H+ [peroxisome] + NADH [peroxisome]	YKR009C	0	Inf	0		12697341		YKR009C
r_2271	3-hydroxyacyl-CoA dehydrogenase (3-oxobutanoyl-CoA)	NAD [peroxisome] + (R)-3-hydroxybutanoyl-CoA [peroxisome] -> H+ [peroxisome] + NADH [peroxisome] + acetoacetyl-CoA [peroxisome]	YKR009C	0	Inf	0		12697341		YKR009C
r_2272	3-hydroxyacyl-CoA dehydrogenase (3-oxohexanoyl-CoA)	NAD [peroxisome] + (R)-3-hydroxyhexanoyl-CoA [peroxisome] -> H+ [peroxisome] + NADH [peroxisome] + 3-oxohexanoyl-CoA [peroxisome]	YKR009C	0	Inf	0		12697341		YKR009C
r_2273	3-hydroxyacyl-CoA dehydrogenase (3-oxooctanoyl-CoA)	NAD [peroxisome] + (R)-3-hydroxyoctanoyl-CoA [peroxisome] -> H+ [peroxisome] + NADH [peroxisome] + 3-oxooctanoyl-CoA [peroxisome]	YKR009C	0	Inf	0		12697341		YKR009C
r_2274	3-hydroxyacyl-CoA dehydrogenase (3-oxoicosanoyl-CoA)	NAD [peroxisome] + (R)-3-hydroxyicosanoyl-CoA [peroxisome] -> H+ [peroxisome] + NADH [peroxisome] + 3-oxoicosanoyl-CoA [peroxisome]	YKR009C	0	Inf	0		12697341		YKR009C
r_2275	3-hydroxyacyl-CoA dehydrogenase (3-oxodocosanoyl-CoA)	NAD [peroxisome] + (R)-3-hydroxydocosanoyl-CoA [peroxisome] -> H+ [peroxisome] + NADH [peroxisome] + 3-oxodocosanoyl-CoA [peroxisome]	YKR009C	0	Inf	0		12697341		YKR009C
r_2276	3-hydroxyacyl-CoA dehydrogenase (3-oxotetracosanoyl-CoA)	NAD [peroxisome] + (R)-3-hydroxytetracosanoyl-CoA [peroxisome] -> H+ [peroxisome] + NADH [peroxisome] + 3-oxotetracosanoyl-CoA [peroxisome]	YKR009C	0	Inf	0		12697341		YKR009C
r_2277	3-hydroxyacyl-CoA dehydrogenase (3-oxo-cis-hexadec-9-enoyl-CoA)	NAD [peroxisome] + (R)-3-hydroxy-cis-hexadec-9-enoyl-CoA [peroxisome] -> H+ [peroxisome] + NADH [peroxisome] + 3-oxo-cis-hexadec-9-enoyl-CoA [peroxisome]	YKR009C	0	Inf	0		12697341		YKR009C
r_2278	3-hydroxyacyl-CoA dehydrogenase (3-oxo-cis-tetradec-7-enoyl-CoA)	NAD [peroxisome] + (R)-3-hydroxy-cis-tetradec-7-enoyl-CoA [peroxisome] -> H+ [peroxisome] + NADH [peroxisome] + 3-oxo-cis-tetradec-7-enoyl-CoA [peroxisome]	YKR009C	0	Inf	0		12697341		YKR009C
r_2279	3-hydroxyacyl-CoA dehydrogenase (3-oxo-cis-dodec-5-enoyl-CoA)	NAD [peroxisome] + (R)-3-hydroxy-cis-dodec-5-enoyl-CoA [peroxisome] -> H+ [peroxisome] + NADH [peroxisome] + 3-oxo-cis-dodec-5-enoyl-CoA [peroxisome]	YKR009C	0	Inf	0		12697341		YKR009C
r_2280	3-hydroxyacyl-CoA dehydrogenase (3-oxo-cis-octadec-9-enoyl-CoA)	NAD [peroxisome] + (R)-3-hydroxy-cis-octadec-9-enoyl-CoA [peroxisome] -> H+ [peroxisome] + NADH [peroxisome] + 3-oxo-cis-octadec-9-enoyl-CoA [peroxisome]	YKR009C	0	Inf	0		12697341		YKR009C
r_2281	3-hydroxyacyl-CoA dehydrogenase (3-oxo-cis-hexadec-7-enoyl-CoA)	NAD [peroxisome] + (R)-3-hydroxy-cis-hexadec-7-enoyl-CoA [peroxisome] -> H+ [peroxisome] + NADH [peroxisome] + 3-oxo-cis-hexadec-7-enoyl-CoA [peroxisome]	YKR009C	0	Inf	0		12697341		YKR009C
r_2282	3-hydroxyacyl-CoA dehydrogenase (3-oxo-cis-tetradec-5-enoyl-CoA)	NAD [peroxisome] + (R)-3-hydroxy-cis-tetradec-5-enoyl-CoA [peroxisome] -> H+ [peroxisome] + NADH [peroxisome] + 3-oxo-cis-tetradec-5-enoyl-CoA [peroxisome]	YKR009C	0	Inf	0		12697341		YKR009C
r_2283	acetyl-CoA C-acyltransferase (acetyl-CoA)	coenzyme A [peroxisome] + acetoacetyl-CoA [peroxisome] -> 2 acetyl-CoA [peroxisome]	YIL160C	0	Inf	0		12697341		YIL160C
r_2284	acetyl-CoA C-acyltransferase (butanoyl-CoA)	coenzyme A [peroxisome] + 3-oxohexanoyl-CoA [peroxisome] -> acetyl-CoA [peroxisome] + butanoyl-CoA [peroxisome]	YIL160C	0	Inf	0		12697341		YIL160C
r_2285	acetyl-CoA C-acyltransferase (hexanoyl-CoA)	coenzyme A [peroxisome] + 3-oxooctanoyl-CoA [peroxisome] -> acetyl-CoA [peroxisome] + hexanoyl-CoA [peroxisome]	YIL160C	0	Inf	0		12697341		YIL160C
r_2286	acetyl-CoA C-acyltransferase (stearoyl-CoA)	coenzyme A [peroxisome] + 3-oxoicosanoyl-CoA [peroxisome] -> acetyl-CoA [peroxisome] + stearoyl-CoA [peroxisome]	YIL160C	0	Inf	0		12697341		YIL160C
r_2287	acetyl-CoA C-acyltransferase (icosanoyl-CoA)	coenzyme A [peroxisome] + 3-oxodocosanoyl-CoA [peroxisome] -> acetyl-CoA [peroxisome] + icosanoyl-CoA [peroxisome]	YIL160C	0	Inf	0		12697341		YIL160C
r_2288	acetyl-CoA C-acyltransferase (docosanoyl-CoA)	coenzyme A [peroxisome] + 3-oxotetracosanoyl-CoA [peroxisome] -> acetyl-CoA [peroxisome] + docosanoyl-CoA [peroxisome]	YIL160C	0	Inf	0		12697341		YIL160C
r_2289	acetyl-CoA C-acyltransferase (cis-tetradec-7-enoyl-CoA)	coenzyme A [peroxisome] + 3-oxo-cis-hexadec-9-enoyl-CoA [peroxisome] -> acetyl-CoA [peroxisome] + cis-tetradec-7-enoyl-CoA [peroxisome]	YIL160C	0	Inf	0		12697341		YIL160C
r_2290	acetyl-CoA C-acyltransferase (cis-dodec-5-enoyl-CoA)	coenzyme A [peroxisome] + 3-oxo-cis-tetradec-7-enoyl-CoA [peroxisome] -> acetyl-CoA [peroxisome] + cis-dodec-5-enoyl-CoA [peroxisome]	YIL160C	0	Inf	0		12697341		YIL160C
r_2291	acetyl-CoA C-acyltransferase (cis-dec-3-enoyl-CoA)	coenzyme A [peroxisome] + 3-oxo-cis-dodec-5-enoyl-CoA [peroxisome] -> acetyl-CoA [peroxisome] + cis-dec-3-enoyl-CoA [peroxisome]	YIL160C	0	Inf	0		12697341		YIL160C
r_2292	acetyl-CoA C-acyltransferase (cis-hexadec-7-enoyl-CoA)	coenzyme A [peroxisome] + 3-oxo-cis-octadec-9-enoyl-CoA [peroxisome] -> acetyl-CoA [peroxisome] + cis-hexadec-7-enoyl-CoA [peroxisome]	YIL160C	0	Inf	0		12697341		YIL160C
r_2293	acetyl-CoA C-acyltransferase (cis-tetradec-5-enoyl-CoA)	coenzyme A [peroxisome] + 3-oxo-cis-hexadec-7-enoyl-CoA [peroxisome] -> acetyl-CoA [peroxisome] + cis-tetradec-5-enoyl-CoA [peroxisome]	YIL160C	0	Inf	0		12697341		YIL160C
r_2294	acetyl-CoA C-acyltransferase (cis-dodec-3-enoyl-CoA)	coenzyme A [peroxisome] + 3-oxo-cis-tetradec-5-enoyl-CoA [peroxisome] -> acetyl-CoA [peroxisome] + cis-dodec-3-enoyl-CoA [peroxisome]	YIL160C	0	Inf	0		12697341		YIL160C
r_2295	delta3,delta2-enoyl-CoA isomerase (cis-dec-3-enoyl-CoA)	cis-dec-3-enoyl-CoA [peroxisome] -> trans-dec-2-enoyl-CoA [peroxisome]	YLR284C	0	Inf	0		12697341		YLR284C
r_2296	delta3,delta2-enoyl-CoA isomerase (trans-2,cis-5-dodecadienoyl-CoA)	trans-2,cis-5-dodecadienoyl-CoA [peroxisome] -> trans-3,cis-5-dodecadienoyl-CoA [peroxisome]	YLR284C	0	Inf	0		12697341		YLR284C
r_2297	delta3,delta2-enoyl-CoA isomerase (trans-dodec-3-enoyl-CoA)	trans-dodec-3-enoyl-CoA [peroxisome] -> trans-dodec-2-enoyl-CoA [peroxisome]	YLR284C	0	Inf	0		12697341		YLR284C
r_2298	delta3,delta2-enoyl-CoA isomerase (cis-dodec-3-enoyl-CoA)	cis-dodec-3-enoyl-CoA [peroxisome] -> trans-dodec-2-enoyl-CoA [peroxisome]	YLR284C	0	Inf	0		12697341		YLR284C
r_2299	delta3,delta2-enoyl-CoA isomerase (trans-2,cis-5-tetradecadienoyl-CoA)	trans-2,cis-5-tetradecadienoyl-CoA [peroxisome] -> trans-3,cis-5-tetradecadienoyl-CoA [peroxisome]	YLR284C	0	Inf	0		12697341		YLR284C
r_2300	delta3,delta2-enoyl-CoA isomerase (trans-tetradec-3-enoyl-CoA)	trans-tetradec-3-enoyl-CoA [peroxisome] -> trans-tetradec-2-enoyl-CoA [peroxisome]	YLR284C	0	Inf	0		12697341		YLR284C
r_2301	delta(3,5)-delta(2,4)-dienoyl-CoA isomerase (trans-3,cis-5-dodecadienoyl-CoA)	trans-3,cis-5-dodecadienoyl-CoA [peroxisome] -> trans-2,trans-4-dodecadienoyl-CoA [peroxisome]	YOR180C	0	Inf	0		12697341		YOR180C
r_2302	delta(3,5)-delta(2,4)-dienoyl-CoA isomerase (trans-3,cis-5-tetradecadienoyl-CoA)	trans-3,cis-5-tetradecadienoyl-CoA [peroxisome] -> trans-2,trans-4-tetradecadienoyl-CoA [peroxisome]	YOR180C	0	Inf	0		12697341		YOR180C
r_2303	2,4-dienoyl-CoA reductase (trans-2,trans-4-dodecadienoyl-CoA)	H+ [peroxisome] + NADPH [peroxisome] + trans-2,trans-4-dodecadienoyl-CoA [peroxisome] -> NADP(+) [peroxisome] + trans-dodec-3-enoyl-CoA [peroxisome]	YNL202W	0	Inf	0		12697341		YNL202W
r_2304	2,4-dienoyl-CoA reductase (trans-2,trans-4-tetradecadienoyl-CoA)	H+ [peroxisome] + NADPH [peroxisome] + trans-2,trans-4-tetradecadienoyl-CoA [peroxisome] -> NADP(+) [peroxisome] + trans-tetradec-3-enoyl-CoA [peroxisome]	YNL202W	0	Inf	0		12697341		YNL202W
r_2305	cis-aconitate(3-) to isocitrate	cis-aconitate [cytoplasm] + H2O [cytoplasm] <=> isocitrate [cytoplasm]	YLR304C	-Inf	Inf	0		15975908		YLR304C
r_2308	glycerol-3-phosphate acyltransferase (16:0), ER membrane	palmitoyl-CoA [endoplasmic reticulum membrane] + glycerol 3-phosphate [endoplasmic reticulum membrane] -> coenzyme A [endoplasmic reticulum membrane] + 1-acyl-sn-glycerol 3-phosphate (16:0) [endoplasmic reticulum membrane]	( YBL011W or YKR067W )	0	Inf	0		22345606		[['YBL011W', 'YKR067W']]
r_2309	glycerol-3-phosphate acyltransferase (16:1), ER membrane	palmitoleoyl-CoA [endoplasmic reticulum membrane] + glycerol 3-phosphate [endoplasmic reticulum membrane] -> coenzyme A [endoplasmic reticulum membrane] + 1-acyl-sn-glycerol 3-phosphate (16:1) [endoplasmic reticulum membrane]	( YBL011W or YKR067W )	0	Inf	0		22345606		[['YBL011W', 'YKR067W']]
r_2310	glycerol-3-phosphate acyltransferase (18:0), ER membrane	stearoyl-CoA [endoplasmic reticulum membrane] + glycerol 3-phosphate [endoplasmic reticulum membrane] -> coenzyme A [endoplasmic reticulum membrane] + 1-acyl-sn-glycerol 3-phosphate (18:0) [endoplasmic reticulum membrane]	YKR067W	0	Inf	0		22345606		YKR067W
r_2311	glycerol-3-phosphate acyltransferase (18:1), ER membrane	oleoyl-CoA [endoplasmic reticulum membrane] + glycerol 3-phosphate [endoplasmic reticulum membrane] -> coenzyme A [endoplasmic reticulum membrane] + 1-acyl-sn-glycerol 3-phosphate (18:1) [endoplasmic reticulum membrane]	YKR067W	0	Inf	0		22345606		YKR067W
r_2312	dihydroxyacetone phosphate acyltransferase (16:0), ER membrane	palmitoyl-CoA [endoplasmic reticulum membrane] + dihydroxyacetone phosphate [endoplasmic reticulum membrane] -> coenzyme A [endoplasmic reticulum membrane] + acylglycerone phosphate (16:0) [endoplasmic reticulum membrane]	( YBL011W or YKR067W )	0	Inf	0		22345606		[['YBL011W', 'YKR067W']]
r_2313	dihydroxyacetone phosphate acyltransferase (16:1), ER membrane	palmitoleoyl-CoA [endoplasmic reticulum membrane] + dihydroxyacetone phosphate [endoplasmic reticulum membrane] -> coenzyme A [endoplasmic reticulum membrane] + acylglycerone phosphate (16:1) [endoplasmic reticulum membrane]	( YBL011W or YKR067W )	0	Inf	0		22345606		[['YBL011W', 'YKR067W']]
r_2314	dihydroxyacetone phosphate acyltransferase (18:0), ER membrane	stearoyl-CoA [endoplasmic reticulum membrane] + dihydroxyacetone phosphate [endoplasmic reticulum membrane] -> coenzyme A [endoplasmic reticulum membrane] + acylglycerone phosphate (18:0) [endoplasmic reticulum membrane]	YKR067W	0	Inf	0		22345606		YKR067W
r_2315	dihydroxyacetone phosphate acyltransferase (18:1), ER membrane	oleoyl-CoA [endoplasmic reticulum membrane] + dihydroxyacetone phosphate [endoplasmic reticulum membrane] -> coenzyme A [endoplasmic reticulum membrane] + acylglycerone phosphate (18:1) [endoplasmic reticulum membrane]	YKR067W	0	Inf	0		22345606		YKR067W
r_2316	glycerol-3-phosphate acyltransferase (16:0), lipid particle	glycerol 3-phosphate [lipid particle] + palmitoyl-CoA [lipid particle] -> coenzyme A [lipid particle] + 1-acyl-sn-glycerol 3-phosphate (16:0) [lipid particle]	YKR067W	0	Inf	0		22345606		YKR067W
r_2317	glycerol-3-phosphate acyltransferase (16:1), lipid particle	glycerol 3-phosphate [lipid particle] + palmitoleoyl-CoA [lipid particle] -> coenzyme A [lipid particle] + 1-acyl-sn-glycerol 3-phosphate (16:1) [lipid particle]	YKR067W	0	Inf	0		22345606		YKR067W
r_2318	glycerol-3-phosphate acyltransferase (18:0), lipid particle	glycerol 3-phosphate [lipid particle] + stearoyl-CoA [lipid particle] -> coenzyme A [lipid particle] + 1-acyl-sn-glycerol 3-phosphate (18:0) [lipid particle]	YKR067W	0	Inf	0		22345606		YKR067W
r_2319	glycerol-3-phosphate acyltransferase (18:1), lipid particle	glycerol 3-phosphate [lipid particle] + oleoyl-CoA [lipid particle] -> coenzyme A [lipid particle] + 1-acyl-sn-glycerol 3-phosphate (18:1) [lipid particle]	YKR067W	0	Inf	0		22345606		YKR067W
r_2320	dihydroxyacetone phosphate acyltransferase (16:0), lipid particle	dihydroxyacetone phosphate [lipid particle] + palmitoyl-CoA [lipid particle] -> coenzyme A [lipid particle] + acylglycerone phosphate (16:0) [lipid particle]	YKR067W	0	Inf	0		22345606		YKR067W
r_2321	dihydroxyacetone phosphate acyltransferase (16:1), lipid particle	dihydroxyacetone phosphate [lipid particle] + palmitoleoyl-CoA [lipid particle] -> coenzyme A [lipid particle] + acylglycerone phosphate (16:1) [lipid particle]	YKR067W	0	Inf	0		22345606		YKR067W
r_2322	dihydroxyacetone phosphate acyltransferase (18:0), lipid particle	dihydroxyacetone phosphate [lipid particle] + stearoyl-CoA [lipid particle] -> coenzyme A [lipid particle] + acylglycerone phosphate (18:0) [lipid particle]	YKR067W	0	Inf	0		22345606		YKR067W
r_2323	dihydroxyacetone phosphate acyltransferase (18:1), lipid particle	dihydroxyacetone phosphate [lipid particle] + oleoyl-CoA [lipid particle] -> coenzyme A [lipid particle] + acylglycerone phosphate (18:1) [lipid particle]	YKR067W	0	Inf	0		22345606		YKR067W
r_2324	acyl dhap reductase (16:0), ER membrane	H+ [endoplasmic reticulum membrane] + NADPH [endoplasmic reticulum membrane] + acylglycerone phosphate (16:0) [endoplasmic reticulum membrane] -> NADP(+) [endoplasmic reticulum membrane] + 1-acyl-sn-glycerol 3-phosphate (16:0) [endoplasmic reticulum membrane]	YIL124W	0	Inf	0		22345606		YIL124W
r_2325	acyl dhap reductase (16:1), ER membrane	H+ [endoplasmic reticulum membrane] + NADPH [endoplasmic reticulum membrane] + acylglycerone phosphate (16:1) [endoplasmic reticulum membrane] -> NADP(+) [endoplasmic reticulum membrane] + 1-acyl-sn-glycerol 3-phosphate (16:1) [endoplasmic reticulum membrane]	YIL124W	0	Inf	0		22345606		YIL124W
r_2326	acyl dhap reductase (18:0), ER membrane	H+ [endoplasmic reticulum membrane] + NADPH [endoplasmic reticulum membrane] + acylglycerone phosphate (18:0) [endoplasmic reticulum membrane] -> NADP(+) [endoplasmic reticulum membrane] + 1-acyl-sn-glycerol 3-phosphate (18:0) [endoplasmic reticulum membrane]	YIL124W	0	Inf	0		22345606		YIL124W
r_2327	acyl dhap reductase (18:1), ER membrane	H+ [endoplasmic reticulum membrane] + NADPH [endoplasmic reticulum membrane] + acylglycerone phosphate (18:1) [endoplasmic reticulum membrane] -> NADP(+) [endoplasmic reticulum membrane] + 1-acyl-sn-glycerol 3-phosphate (18:1) [endoplasmic reticulum membrane]	YIL124W	0	Inf	0		22345606		YIL124W
r_2328	acyl dhap reductase (16:0), lipid particle	H+ [lipid particle] + acylglycerone phosphate (16:0) [lipid particle] + NADPH [lipid particle] -> 1-acyl-sn-glycerol 3-phosphate (16:0) [lipid particle] + NADP(+) [lipid particle]	YIL124W	0	Inf	0		22345606		YIL124W
r_2329	acyl dhap reductase (16:1), lipid particle	H+ [lipid particle] + acylglycerone phosphate (16:1) [lipid particle] + NADPH [lipid particle] -> 1-acyl-sn-glycerol 3-phosphate (16:1) [lipid particle] + NADP(+) [lipid particle]	YIL124W	0	Inf	0		22345606		YIL124W
r_2330	acyl dhap reductase (18:0), lipid particle	H+ [lipid particle] + acylglycerone phosphate (18:0) [lipid particle] + NADPH [lipid particle] -> 1-acyl-sn-glycerol 3-phosphate (18:0) [lipid particle] + NADP(+) [lipid particle]	YIL124W	0	Inf	0		22345606		YIL124W
r_2331	acyl dhap reductase (18:1), lipid particle	H+ [lipid particle] + acylglycerone phosphate (18:1) [lipid particle] + NADPH [lipid particle] -> 1-acyl-sn-glycerol 3-phosphate (18:1) [lipid particle] + NADP(+) [lipid particle]	YIL124W	0	Inf	0		22345606		YIL124W
r_2332	1-acyl-sn-glycerol-3-phosphate acyltransferase (1-16:0, 2-16:1), ER membrane	palmitoleoyl-CoA [endoplasmic reticulum membrane] + 1-acyl-sn-glycerol 3-phosphate (16:0) [endoplasmic reticulum membrane] -> coenzyme A [endoplasmic reticulum membrane] + phosphatidate (1-16:0, 2-16:1) [endoplasmic reticulum membrane]	YOR175C	0	Inf	0		22345606		YOR175C
r_2333	1-acyl-sn-glycerol-3-phosphate acyltransferase (1-16:0, 2-18:1), ER membrane	oleoyl-CoA [endoplasmic reticulum membrane] + 1-acyl-sn-glycerol 3-phosphate (16:0) [endoplasmic reticulum membrane] -> coenzyme A [endoplasmic reticulum membrane] + phosphatidate (1-16:0, 2-18:1) [endoplasmic reticulum membrane]	( YDL052C or YOR175C )	0	Inf	0		22345606		[['YDL052C', 'YOR175C']]
r_2334	1-acyl-sn-glycerol-3-phosphate acyltransferase (1-16:1, 2-16:1), ER membrane	palmitoleoyl-CoA [endoplasmic reticulum membrane] + 1-acyl-sn-glycerol 3-phosphate (16:1) [endoplasmic reticulum membrane] -> coenzyme A [endoplasmic reticulum membrane] + phosphatidate (1-16:1, 2-16:1) [endoplasmic reticulum membrane]	YOR175C	0	Inf	0		22345606		YOR175C
r_2335	1-acyl-sn-glycerol-3-phosphate acyltransferase (1-16:1, 2-18:1), ER membrane	oleoyl-CoA [endoplasmic reticulum membrane] + 1-acyl-sn-glycerol 3-phosphate (16:1) [endoplasmic reticulum membrane] -> coenzyme A [endoplasmic reticulum membrane] + phosphatidate (1-16:1, 2-18:1) [endoplasmic reticulum membrane]	( YDL052C or YOR175C )	0	Inf	0		22345606		[['YDL052C', 'YOR175C']]
r_2336	1-acyl-sn-glycerol-3-phosphate acyltransferase (1-18:0, 2-16:1), ER membrane	palmitoleoyl-CoA [endoplasmic reticulum membrane] + 1-acyl-sn-glycerol 3-phosphate (18:0) [endoplasmic reticulum membrane] -> coenzyme A [endoplasmic reticulum membrane] + phosphatidate (1-18:0, 2-16:1) [endoplasmic reticulum membrane]	YOR175C	0	Inf	0		22345606		YOR175C
r_2337	1-acyl-sn-glycerol-3-phosphate acyltransferase (1-18:0, 2-18:1), ER membrane	oleoyl-CoA [endoplasmic reticulum membrane] + 1-acyl-sn-glycerol 3-phosphate (18:0) [endoplasmic reticulum membrane] -> coenzyme A [endoplasmic reticulum membrane] + phosphatidate (1-18:0, 2-18:1) [endoplasmic reticulum membrane]	( YDL052C or YOR175C )	0	Inf	0		22345606		[['YDL052C', 'YOR175C']]
r_2338	1-acyl-sn-glycerol-3-phosphate acyltransferase (1-18:1, 2-16:1), ER membrane	palmitoleoyl-CoA [endoplasmic reticulum membrane] + 1-acyl-sn-glycerol 3-phosphate (18:1) [endoplasmic reticulum membrane] -> coenzyme A [endoplasmic reticulum membrane] + phosphatidate (1-18:1, 2-16:1) [endoplasmic reticulum membrane]	YOR175C	0	Inf	0		22345606		YOR175C
r_2339	1-acyl-sn-glycerol-3-phosphate acyltransferase (1-18:1, 2-18:1), ER membrane	oleoyl-CoA [endoplasmic reticulum membrane] + 1-acyl-sn-glycerol 3-phosphate (18:1) [endoplasmic reticulum membrane] -> coenzyme A [endoplasmic reticulum membrane] + phosphatidate (1-18:1, 2-18:1) [endoplasmic reticulum membrane]	( YDL052C or YOR175C )	0	Inf	0		22345606		[['YDL052C', 'YOR175C']]
r_2340	1-acyl-sn-glycerol-3-phosphate acyltransferase (1-16:0, 2-18:1), lipid particle	oleoyl-CoA [lipid particle] + 1-acyl-sn-glycerol 3-phosphate (16:0) [lipid particle] -> coenzyme A [lipid particle] + phosphatidate (1-16:0, 2-18:1) [lipid particle]	( YDL052C or YKR089C or YOR081C )	0	Inf	0		22345606		[['YDL052C', 'YKR089C', 'YOR081C']]
r_2341	1-acyl-sn-glycerol-3-phosphate acyltransferase (1-16:1, 2-18:1), lipid particle	oleoyl-CoA [lipid particle] + 1-acyl-sn-glycerol 3-phosphate (16:1) [lipid particle] -> coenzyme A [lipid particle] + phosphatidate (1-16:1, 2-18:1) [lipid particle]	( YDL052C or YKR089C or YOR081C )	0	Inf	0		22345606		[['YDL052C', 'YKR089C', 'YOR081C']]
r_2342	1-acyl-sn-glycerol-3-phosphate acyltransferase (1-18:0, 2-18:1), lipid particle	oleoyl-CoA [lipid particle] + 1-acyl-sn-glycerol 3-phosphate (18:0) [lipid particle] -> coenzyme A [lipid particle] + phosphatidate (1-18:0, 2-18:1) [lipid particle]	( YDL052C or YKR089C or YOR081C )	0	Inf	0		22345606		[['YDL052C', 'YKR089C', 'YOR081C']]
r_2343	1-acyl-sn-glycerol-3-phosphate acyltransferase (1-18:1, 2-18:1), lipid particle	oleoyl-CoA [lipid particle] + 1-acyl-sn-glycerol 3-phosphate (18:1) [lipid particle] -> coenzyme A [lipid particle] + phosphatidate (1-18:1, 2-18:1) [lipid particle]	( YDL052C or YKR089C or YOR081C )	0	Inf	0		22345606		[['YDL052C', 'YKR089C', 'YOR081C']]
r_2344	PA phosphatase (1-16:0, 2-16:1), ER membrane	H2O [endoplasmic reticulum membrane] + phosphatidate (1-16:0, 2-16:1) [endoplasmic reticulum membrane] -> phosphate [endoplasmic reticulum membrane] + diglyceride (1-16:0, 2-16:1) [endoplasmic reticulum membrane]	YMR165C	0	Inf	0		22345606		YMR165C
r_2345	PA phosphatase (1-16:0, 2-18:1), ER membrane	H2O [endoplasmic reticulum membrane] + phosphatidate (1-16:0, 2-18:1) [endoplasmic reticulum membrane] -> phosphate [endoplasmic reticulum membrane] + diglyceride (1-16:0, 2-18:1) [endoplasmic reticulum membrane]	YMR165C	0	Inf	0		22345606		YMR165C
r_2346	PA phosphatase (1-16:1, 2-16:1), ER membrane	H2O [endoplasmic reticulum membrane] + phosphatidate (1-16:1, 2-16:1) [endoplasmic reticulum membrane] -> phosphate [endoplasmic reticulum membrane] + diglyceride (1-16:1, 2-16:1) [endoplasmic reticulum membrane]	YMR165C	0	Inf	0		22345606		YMR165C
r_2347	PA phosphatase (1-16:1, 2-18:1), ER membrane	H2O [endoplasmic reticulum membrane] + phosphatidate (1-16:1, 2-18:1) [endoplasmic reticulum membrane] -> phosphate [endoplasmic reticulum membrane] + diglyceride (1-16:1, 2-18:1) [endoplasmic reticulum membrane]	YMR165C	0	Inf	0		22345606		YMR165C
r_2348	PA phosphatase (1-18:0, 2-16:1), ER membrane	H2O [endoplasmic reticulum membrane] + phosphatidate (1-18:0, 2-16:1) [endoplasmic reticulum membrane] -> phosphate [endoplasmic reticulum membrane] + diglyceride (1-18:0, 2-16:1) [endoplasmic reticulum membrane]	YMR165C	0	Inf	0		22345606		YMR165C
r_2349	PA phosphatase (1-18:0, 2-18:1), ER membrane	H2O [endoplasmic reticulum membrane] + phosphatidate (1-18:0, 2-18:1) [endoplasmic reticulum membrane] -> phosphate [endoplasmic reticulum membrane] + diglyceride (1-18:0, 2-18:1) [endoplasmic reticulum membrane]	YMR165C	0	Inf	0		22345606		YMR165C
r_2350	PA phosphatase (1-18:1, 2-16:1), ER membrane	H2O [endoplasmic reticulum membrane] + phosphatidate (1-18:1, 2-16:1) [endoplasmic reticulum membrane] -> phosphate [endoplasmic reticulum membrane] + diglyceride (1-18:1, 2-16:1) [endoplasmic reticulum membrane]	YMR165C	0	Inf	0		22345606		YMR165C
r_2351	PA phosphatase (1-18:1, 2-18:1), ER membrane	H2O [endoplasmic reticulum membrane] + phosphatidate (1-18:1, 2-18:1) [endoplasmic reticulum membrane] -> phosphate [endoplasmic reticulum membrane] + diglyceride (1-18:1, 2-18:1) [endoplasmic reticulum membrane]	YMR165C	0	Inf	0		22345606		YMR165C
r_2352	PA phosphatase (1-16:0, 2-16:1), vacuolar membrane	phosphatidate (1-16:0, 2-16:1) [vacuolar membrane] + H2O [vacuolar membrane] -> phosphate [vacuolar membrane] + diglyceride (1-16:0, 2-16:1) [vacuolar membrane]	YDR284C	0	Inf	0		22345606		YDR284C
r_2353	PA phosphatase (1-16:0, 2-18:1), vacuolar membrane	H2O [vacuolar membrane] + phosphatidate (1-16:0, 2-18:1) [vacuolar membrane] -> phosphate [vacuolar membrane] + diglyceride (1-16:0, 2-18:1) [vacuolar membrane]	YDR284C	0	Inf	0		22345606		YDR284C
r_2354	PA phosphatase (1-16:1, 2-16:1), vacuolar membrane	H2O [vacuolar membrane] + phosphatidate (1-16:1, 2-16:1) [vacuolar membrane] -> phosphate [vacuolar membrane] + diglyceride (1-16:1, 2-16:1) [vacuolar membrane]	YDR284C	0	Inf	0		22345606		YDR284C
r_2355	PA phosphatase (1-16:1, 2-18:1), vacuolar membrane	H2O [vacuolar membrane] + phosphatidate (1-16:1, 2-18:1) [vacuolar membrane] -> phosphate [vacuolar membrane] + diglyceride (1-16:1, 2-18:1) [vacuolar membrane]	YDR284C	0	Inf	0		22345606		YDR284C
r_2356	PA phosphatase (1-18:0, 2-16:1), vacuolar membrane	H2O [vacuolar membrane] + phosphatidate (1-18:0, 2-16:1) [vacuolar membrane] -> phosphate [vacuolar membrane] + diglyceride (1-18:0, 2-16:1) [vacuolar membrane]	YDR284C	0	Inf	0		22345606		YDR284C
r_2357	PA phosphatase (1-18:0, 2-18:1), vacuolar membrane	H2O [vacuolar membrane] + phosphatidate (1-18:0, 2-18:1) [vacuolar membrane] -> phosphate [vacuolar membrane] + diglyceride (1-18:0, 2-18:1) [vacuolar membrane]	YDR284C	0	Inf	0		22345606		YDR284C
r_2358	PA phosphatase (1-18:1, 2-16:1), vacuolar membrane	H2O [vacuolar membrane] + phosphatidate (1-18:1, 2-16:1) [vacuolar membrane] -> phosphate [vacuolar membrane] + diglyceride (1-18:1, 2-16:1) [vacuolar membrane]	YDR284C	0	Inf	0		22345606		YDR284C
r_2359	PA phosphatase (1-18:1, 2-18:1), vacuolar membrane	H2O [vacuolar membrane] + phosphatidate (1-18:1, 2-18:1) [vacuolar membrane] -> phosphate [vacuolar membrane] + diglyceride (1-18:1, 2-18:1) [vacuolar membrane]	YDR284C	0	Inf	0		22345606		YDR284C
r_2360	PA phosphatase (1-16:0, 2-16:1), Golgi membrane	phosphatidate (1-16:0, 2-16:1) [Golgi membrane] + H2O [Golgi membrane] -> phosphate [Golgi membrane] + diglyceride (1-16:0, 2-16:1) [Golgi membrane]	YDR503C	0	Inf	0		22345606		YDR503C
r_2361	PA phosphatase (1-16:0, 2-18:1), Golgi membrane	H2O [Golgi membrane] + phosphatidate (1-16:0, 2-18:1) [Golgi membrane] -> phosphate [Golgi membrane] + diglyceride (1-16:0, 2-18:1) [Golgi membrane]	YDR503C	0	Inf	0		22345606		YDR503C
r_2362	PA phosphatase (1-16:1, 2-16:1), Golgi membrane	H2O [Golgi membrane] + phosphatidate (1-16:1, 2-16:1) [Golgi membrane] -> phosphate [Golgi membrane] + diglyceride (1-16:1, 2-16:1) [Golgi membrane]	YDR503C	0	Inf	0		22345606		YDR503C
r_2363	PA phosphatase (1-16:1, 2-18:1), Golgi membrane	H2O [Golgi membrane] + phosphatidate (1-16:1, 2-18:1) [Golgi membrane] -> phosphate [Golgi membrane] + diglyceride (1-16:1, 2-18:1) [Golgi membrane]	YDR503C	0	Inf	0		22345606		YDR503C
r_2364	PA phosphatase (1-18:0, 2-16:1), Golgi membrane	H2O [Golgi membrane] + phosphatidate (1-18:0, 2-16:1) [Golgi membrane] -> phosphate [Golgi membrane] + diglyceride (1-18:0, 2-16:1) [Golgi membrane]	YDR503C	0	Inf	0		22345606		YDR503C
r_2365	PA phosphatase (1-18:0, 2-18:1), Golgi membrane	H2O [Golgi membrane] + phosphatidate (1-18:0, 2-18:1) [Golgi membrane] -> phosphate [Golgi membrane] + diglyceride (1-18:0, 2-18:1) [Golgi membrane]	YDR503C	0	Inf	0		22345606		YDR503C
r_2366	PA phosphatase (1-18:1, 2-16:1), Golgi membrane	H2O [Golgi membrane] + phosphatidate (1-18:1, 2-16:1) [Golgi membrane] -> phosphate [Golgi membrane] + diglyceride (1-18:1, 2-16:1) [Golgi membrane]	YDR503C	0	Inf	0		22345606		YDR503C
r_2367	PA phosphatase (1-18:1, 2-18:1), Golgi membrane	H2O [Golgi membrane] + phosphatidate (1-18:1, 2-18:1) [Golgi membrane] -> phosphate [Golgi membrane] + diglyceride (1-18:1, 2-18:1) [Golgi membrane]	YDR503C	0	Inf	0		22345606		YDR503C
r_2368	diacylglycerol acyltransferase (1-16:0, 2-16:1, 3-16:0), ER membrane	palmitoyl-CoA [endoplasmic reticulum membrane] + diglyceride (1-16:0, 2-16:1) [endoplasmic reticulum membrane] -> coenzyme A [endoplasmic reticulum membrane] + triglyceride (1-16:0, 2-16:1, 3-16:0) [endoplasmic reticulum membrane]	( YCR048W or YNR019W or YOR245C )	0	Inf	0		22345606		[['YCR048W', 'YNR019W', 'YOR245C']]
r_2369	diacylglycerol acyltransferase (1-16:0, 2-18:1, 3-16:0), ER membrane	palmitoyl-CoA [endoplasmic reticulum membrane] + diglyceride (1-16:0, 2-18:1) [endoplasmic reticulum membrane] -> coenzyme A [endoplasmic reticulum membrane] + triglyceride (1-16:0, 2-18:1, 3-16:0) [endoplasmic reticulum membrane]	( YCR048W or YNR019W or YOR245C )	0	Inf	0		22345606		[['YCR048W', 'YNR019W', 'YOR245C']]
r_2370	diacylglycerol acyltransferase (1-16:1, 2-16:1, 3-16:0), ER membrane	palmitoyl-CoA [endoplasmic reticulum membrane] + diglyceride (1-16:1, 2-16:1) [endoplasmic reticulum membrane] -> coenzyme A [endoplasmic reticulum membrane] + triglyceride (1-16:1, 2-16:1, 3-16:0) [endoplasmic reticulum membrane]	( YCR048W or YNR019W or YOR245C )	0	Inf	0		22345606		[['YCR048W', 'YNR019W', 'YOR245C']]
r_2371	diacylglycerol acyltransferase (1-16:1, 2-18:1, 3-16:0), ER membrane	palmitoyl-CoA [endoplasmic reticulum membrane] + diglyceride (1-16:1, 2-18:1) [endoplasmic reticulum membrane] -> coenzyme A [endoplasmic reticulum membrane] + triglyceride (1-16:1, 2-18:1, 3-16:0) [endoplasmic reticulum membrane]	( YCR048W or YNR019W or YOR245C )	0	Inf	0		22345606		[['YCR048W', 'YNR019W', 'YOR245C']]
r_2372	diacylglycerol acyltransferase (1-18:0, 2-16:1, 3-16:0), ER membrane	palmitoyl-CoA [endoplasmic reticulum membrane] + diglyceride (1-18:0, 2-16:1) [endoplasmic reticulum membrane] -> coenzyme A [endoplasmic reticulum membrane] + triglyceride (1-18:0, 2-16:1, 3-16:0) [endoplasmic reticulum membrane]	( YCR048W or YNR019W or YOR245C )	0	Inf	0		22345606		[['YCR048W', 'YNR019W', 'YOR245C']]
r_2373	diacylglycerol acyltransferase (1-18:0, 2-18:1, 3-16:0), ER membrane	palmitoyl-CoA [endoplasmic reticulum membrane] + diglyceride (1-18:0, 2-18:1) [endoplasmic reticulum membrane] -> coenzyme A [endoplasmic reticulum membrane] + triglyceride (1-18:0, 2-18:1, 3-16:0) [endoplasmic reticulum membrane]	( YCR048W or YNR019W or YOR245C )	0	Inf	0		22345606		[['YCR048W', 'YNR019W', 'YOR245C']]
r_2374	diacylglycerol acyltransferase (1-18:1, 2-16:1, 3-16:0), ER membrane	palmitoyl-CoA [endoplasmic reticulum membrane] + diglyceride (1-18:1, 2-16:1) [endoplasmic reticulum membrane] -> coenzyme A [endoplasmic reticulum membrane] + triglyceride (1-18:1, 2-16:1, 3-16:0) [endoplasmic reticulum membrane]	( YCR048W or YNR019W or YOR245C )	0	Inf	0		22345606		[['YCR048W', 'YNR019W', 'YOR245C']]
r_2375	diacylglycerol acyltransferase (1-18:1, 2-18:1, 3-16:0), ER membrane	palmitoyl-CoA [endoplasmic reticulum membrane] + diglyceride (1-18:1, 2-18:1) [endoplasmic reticulum membrane] -> coenzyme A [endoplasmic reticulum membrane] + triglyceride (1-18:1, 2-18:1, 3-16:0) [endoplasmic reticulum membrane]	( YCR048W or YNR019W or YOR245C )	0	Inf	0		22345606		[['YCR048W', 'YNR019W', 'YOR245C']]
r_2376	diacylglycerol acyltransferase (1-16:0, 2-16:1, 3-16:1), ER membrane	palmitoleoyl-CoA [endoplasmic reticulum membrane] + diglyceride (1-16:0, 2-16:1) [endoplasmic reticulum membrane] -> coenzyme A [endoplasmic reticulum membrane] + triglyceride (1-16:0, 2-16:1, 3-16:1) [endoplasmic reticulum membrane]	( YCR048W or YNR019W or YOR245C )	0	Inf	0		22345606		[['YCR048W', 'YNR019W', 'YOR245C']]
r_2377	diacylglycerol acyltransferase (1-16:0, 2-18:1, 3-16:1), ER membrane	palmitoleoyl-CoA [endoplasmic reticulum membrane] + diglyceride (1-16:0, 2-18:1) [endoplasmic reticulum membrane] -> coenzyme A [endoplasmic reticulum membrane] + triglyceride (1-16:0, 2-18:1, 3-16:1) [endoplasmic reticulum membrane]	( YCR048W or YNR019W or YOR245C )	0	Inf	0		22345606		[['YCR048W', 'YNR019W', 'YOR245C']]
r_2378	diacylglycerol acyltransferase (1-16:1, 2-16:1, 3-16:1), ER membrane	palmitoleoyl-CoA [endoplasmic reticulum membrane] + diglyceride (1-16:1, 2-16:1) [endoplasmic reticulum membrane] -> coenzyme A [endoplasmic reticulum membrane] + triglyceride (1-16:1, 2-16:1, 3-16:1) [endoplasmic reticulum membrane]	( YCR048W or YNR019W or YOR245C )	0	Inf	0		22345606		[['YCR048W', 'YNR019W', 'YOR245C']]
r_2379	diacylglycerol acyltransferase (1-16:1, 2-18:1, 3-16:1), ER membrane	palmitoleoyl-CoA [endoplasmic reticulum membrane] + diglyceride (1-16:1, 2-18:1) [endoplasmic reticulum membrane] -> coenzyme A [endoplasmic reticulum membrane] + triglyceride (1-16:1, 2-18:1, 3-16:1) [endoplasmic reticulum membrane]	( YCR048W or YNR019W or YOR245C )	0	Inf	0		22345606		[['YCR048W', 'YNR019W', 'YOR245C']]
r_2380	diacylglycerol acyltransferase (1-18:0, 2-16:1, 3-16:1), ER membrane	palmitoleoyl-CoA [endoplasmic reticulum membrane] + diglyceride (1-18:0, 2-16:1) [endoplasmic reticulum membrane] -> coenzyme A [endoplasmic reticulum membrane] + triglyceride (1-18:0, 2-16:1, 3-16:1) [endoplasmic reticulum membrane]	( YCR048W or YNR019W or YOR245C )	0	Inf	0		22345606		[['YCR048W', 'YNR019W', 'YOR245C']]
r_2381	diacylglycerol acyltransferase (1-18:0, 2-18:1, 3-16:1), ER membrane	palmitoleoyl-CoA [endoplasmic reticulum membrane] + diglyceride (1-18:0, 2-18:1) [endoplasmic reticulum membrane] -> coenzyme A [endoplasmic reticulum membrane] + triglyceride (1-18:0, 2-18:1, 3-16:1) [endoplasmic reticulum membrane]	( YCR048W or YNR019W or YOR245C )	0	Inf	0		22345606		[['YCR048W', 'YNR019W', 'YOR245C']]
r_2382	diacylglycerol acyltransferase (1-18:1, 2-16:1, 3-16:1), ER membrane	palmitoleoyl-CoA [endoplasmic reticulum membrane] + diglyceride (1-18:1, 2-16:1) [endoplasmic reticulum membrane] -> coenzyme A [endoplasmic reticulum membrane] + triglyceride (1-18:1, 2-16:1, 3-16:1) [endoplasmic reticulum membrane]	( YCR048W or YNR019W or YOR245C )	0	Inf	0		22345606		[['YCR048W', 'YNR019W', 'YOR245C']]
r_2383	diacylglycerol acyltransferase (1-18:1, 2-18:1, 3-16:1), ER membrane	palmitoleoyl-CoA [endoplasmic reticulum membrane] + diglyceride (1-18:1, 2-18:1) [endoplasmic reticulum membrane] -> coenzyme A [endoplasmic reticulum membrane] + triglyceride (1-18:1, 2-18:1, 3-16:1) [endoplasmic reticulum membrane]	( YCR048W or YNR019W or YOR245C )	0	Inf	0		22345606		[['YCR048W', 'YNR019W', 'YOR245C']]
r_2384	diacylglycerol acyltransferase (1-16:0, 2-16:1, 3-18:0), ER membrane	stearoyl-CoA [endoplasmic reticulum membrane] + diglyceride (1-16:0, 2-16:1) [endoplasmic reticulum membrane] -> coenzyme A [endoplasmic reticulum membrane] + triglyceride (1-16:0, 2-16:1, 3-18:0) [endoplasmic reticulum membrane]	( YCR048W or YNR019W or YOR245C )	0	Inf	0		22345606		[['YCR048W', 'YNR019W', 'YOR245C']]
r_2385	diacylglycerol acyltransferase (1-16:0, 2-18:1, 3-18:0), ER membrane	stearoyl-CoA [endoplasmic reticulum membrane] + diglyceride (1-16:0, 2-18:1) [endoplasmic reticulum membrane] -> coenzyme A [endoplasmic reticulum membrane] + triglyceride (1-16:0, 2-18:1, 3-18:0) [endoplasmic reticulum membrane]	( YCR048W or YNR019W or YOR245C )	0	Inf	0		22345606		[['YCR048W', 'YNR019W', 'YOR245C']]
r_2386	diacylglycerol acyltransferase (1-16:1, 2-16:1, 3-18:0), ER membrane	stearoyl-CoA [endoplasmic reticulum membrane] + diglyceride (1-16:1, 2-16:1) [endoplasmic reticulum membrane] -> coenzyme A [endoplasmic reticulum membrane] + triglyceride (1-16:1, 2-16:1, 3-18:0) [endoplasmic reticulum membrane]	( YCR048W or YNR019W or YOR245C )	0	Inf	0		22345606		[['YCR048W', 'YNR019W', 'YOR245C']]
r_2387	diacylglycerol acyltransferase (1-16:1, 2-18:1, 3-18:0), ER membrane	stearoyl-CoA [endoplasmic reticulum membrane] + diglyceride (1-16:1, 2-18:1) [endoplasmic reticulum membrane] -> coenzyme A [endoplasmic reticulum membrane] + triglyceride (1-16:1, 2-18:1, 3-18:0) [endoplasmic reticulum membrane]	( YCR048W or YNR019W or YOR245C )	0	Inf	0		22345606		[['YCR048W', 'YNR019W', 'YOR245C']]
r_2388	diacylglycerol acyltransferase (1-18:0, 2-16:1, 3-18:0), ER membrane	stearoyl-CoA [endoplasmic reticulum membrane] + diglyceride (1-18:0, 2-16:1) [endoplasmic reticulum membrane] -> coenzyme A [endoplasmic reticulum membrane] + triglyceride (1-18:0, 2-16:1, 3-18:0) [endoplasmic reticulum membrane]	( YCR048W or YNR019W or YOR245C )	0	Inf	0		22345606		[['YCR048W', 'YNR019W', 'YOR245C']]
r_2389	diacylglycerol acyltransferase (1-18:0, 2-18:1, 3-18:0), ER membrane	stearoyl-CoA [endoplasmic reticulum membrane] + diglyceride (1-18:0, 2-18:1) [endoplasmic reticulum membrane] -> coenzyme A [endoplasmic reticulum membrane] + triglyceride (1-18:0, 2-18:1, 3-18:0) [endoplasmic reticulum membrane]	( YCR048W or YNR019W or YOR245C )	0	Inf	0		22345606		[['YCR048W', 'YNR019W', 'YOR245C']]
r_2390	diacylglycerol acyltransferase (1-18:1, 2-16:1, 3-18:0), ER membrane	stearoyl-CoA [endoplasmic reticulum membrane] + diglyceride (1-18:1, 2-16:1) [endoplasmic reticulum membrane] -> coenzyme A [endoplasmic reticulum membrane] + triglyceride (1-18:1, 2-16:1, 3-18:0) [endoplasmic reticulum membrane]	( YCR048W or YNR019W or YOR245C )	0	Inf	0		22345606		[['YCR048W', 'YNR019W', 'YOR245C']]
r_2391	diacylglycerol acyltransferase (1-18:1, 2-18:1, 3-18:0), ER membrane	stearoyl-CoA [endoplasmic reticulum membrane] + diglyceride (1-18:1, 2-18:1) [endoplasmic reticulum membrane] -> coenzyme A [endoplasmic reticulum membrane] + triglyceride (1-18:1, 2-18:1, 3-18:0) [endoplasmic reticulum membrane]	( YCR048W or YNR019W or YOR245C )	0	Inf	0		22345606		[['YCR048W', 'YNR019W', 'YOR245C']]
r_2392	diacylglycerol acyltransferase (1-16:0, 2-16:1, 3-18:1), ER membrane	oleoyl-CoA [endoplasmic reticulum membrane] + diglyceride (1-16:0, 2-16:1) [endoplasmic reticulum membrane] -> coenzyme A [endoplasmic reticulum membrane] + triglyceride (1-16:0, 2-16:1, 3-18:1) [endoplasmic reticulum membrane]	( YCR048W or YNR019W or YOR245C )	0	Inf	0		22345606		[['YCR048W', 'YNR019W', 'YOR245C']]
r_2393	diacylglycerol acyltransferase (1-16:0, 2-18:1, 3-18:1), ER membrane	oleoyl-CoA [endoplasmic reticulum membrane] + diglyceride (1-16:0, 2-18:1) [endoplasmic reticulum membrane] -> coenzyme A [endoplasmic reticulum membrane] + triglyceride (1-16:0, 2-18:1, 3-18:1) [endoplasmic reticulum membrane]	( YCR048W or YNR019W or YOR245C )	0	Inf	0		22345606		[['YCR048W', 'YNR019W', 'YOR245C']]
r_2394	diacylglycerol acyltransferase (1-16:1, 2-16:1, 3-18:1), ER membrane	oleoyl-CoA [endoplasmic reticulum membrane] + diglyceride (1-16:1, 2-16:1) [endoplasmic reticulum membrane] -> coenzyme A [endoplasmic reticulum membrane] + triglyceride (1-16:1, 2-16:1, 3-18:1) [endoplasmic reticulum membrane]	( YCR048W or YNR019W or YOR245C )	0	Inf	0		22345606		[['YCR048W', 'YNR019W', 'YOR245C']]
r_2395	diacylglycerol acyltransferase (1-16:1, 2-18:1, 3-18:1), ER membrane	oleoyl-CoA [endoplasmic reticulum membrane] + diglyceride (1-16:1, 2-18:1) [endoplasmic reticulum membrane] -> coenzyme A [endoplasmic reticulum membrane] + triglyceride (1-16:1, 2-18:1, 3-18:1) [endoplasmic reticulum membrane]	( YCR048W or YNR019W or YOR245C )	0	Inf	0		22345606		[['YCR048W', 'YNR019W', 'YOR245C']]
r_2396	diacylglycerol acyltransferase (1-18:0, 2-16:1, 3-18:1), ER membrane	oleoyl-CoA [endoplasmic reticulum membrane] + diglyceride (1-18:0, 2-16:1) [endoplasmic reticulum membrane] -> coenzyme A [endoplasmic reticulum membrane] + triglyceride (1-18:0, 2-16:1, 3-18:1) [endoplasmic reticulum membrane]	( YCR048W or YNR019W or YOR245C )	0	Inf	0		22345606		[['YCR048W', 'YNR019W', 'YOR245C']]
r_2397	diacylglycerol acyltransferase (1-18:0, 2-18:1, 3-18:1), ER membrane	oleoyl-CoA [endoplasmic reticulum membrane] + diglyceride (1-18:0, 2-18:1) [endoplasmic reticulum membrane] -> coenzyme A [endoplasmic reticulum membrane] + triglyceride (1-18:0, 2-18:1, 3-18:1) [endoplasmic reticulum membrane]	( YCR048W or YNR019W or YOR245C )	0	Inf	0		22345606		[['YCR048W', 'YNR019W', 'YOR245C']]
r_2398	diacylglycerol acyltransferase (1-18:1, 2-16:1, 3-18:1), ER membrane	oleoyl-CoA [endoplasmic reticulum membrane] + diglyceride (1-18:1, 2-16:1) [endoplasmic reticulum membrane] -> coenzyme A [endoplasmic reticulum membrane] + triglyceride (1-18:1, 2-16:1, 3-18:1) [endoplasmic reticulum membrane]	( YCR048W or YNR019W or YOR245C )	0	Inf	0		22345606		[['YCR048W', 'YNR019W', 'YOR245C']]
r_2399	diacylglycerol acyltransferase (1-18:1, 2-18:1, 3-18:1), ER membrane	oleoyl-CoA [endoplasmic reticulum membrane] + diglyceride (1-18:1, 2-18:1) [endoplasmic reticulum membrane] -> coenzyme A [endoplasmic reticulum membrane] + triglyceride (1-18:1, 2-18:1, 3-18:1) [endoplasmic reticulum membrane]	( YCR048W or YNR019W or YOR245C )	0	Inf	0		22345606		[['YCR048W', 'YNR019W', 'YOR245C']]
r_2400	diacylglycerol acyltransferase (1-16:0, 2-16:1, 3-16:0), lipid particle	palmitoyl-CoA [lipid particle] + diglyceride (1-16:0, 2-16:1) [lipid particle] -> coenzyme A [lipid particle] + triglyceride (1-16:0, 2-16:1, 3-16:0) [lipid particle]	YOR245C	0	Inf	0		22345606		YOR245C
r_2401	diacylglycerol acyltransferase (1-16:0, 2-18:1, 3-16:0), lipid particle	palmitoyl-CoA [lipid particle] + diglyceride (1-16:0, 2-18:1) [lipid particle] -> coenzyme A [lipid particle] + triglyceride (1-16:0, 2-18:1, 3-16:0) [lipid particle]	YOR245C	0	Inf	0		22345606		YOR245C
r_2402	diacylglycerol acyltransferase (1-16:1, 2-16:1, 3-16:0), lipid particle	palmitoyl-CoA [lipid particle] + diglyceride (1-16:1, 2-16:1) [lipid particle] -> coenzyme A [lipid particle] + triglyceride (1-16:1, 2-16:1, 3-16:0) [lipid particle]	YOR245C	0	Inf	0		22345606		YOR245C
r_2403	diacylglycerol acyltransferase (1-16:1, 2-18:1, 3-16:0), lipid particle	palmitoyl-CoA [lipid particle] + diglyceride (1-16:1, 2-18:1) [lipid particle] -> coenzyme A [lipid particle] + triglyceride (1-16:1, 2-18:1, 3-16:0) [lipid particle]	YOR245C	0	Inf	0		22345606		YOR245C
r_2404	diacylglycerol acyltransferase (1-18:0, 2-16:1, 3-16:0), lipid particle	palmitoyl-CoA [lipid particle] + diglyceride (1-18:0, 2-16:1) [lipid particle] -> coenzyme A [lipid particle] + triglyceride (1-18:0, 2-16:1, 3-16:0) [lipid particle]	YOR245C	0	Inf	0		22345606		YOR245C
r_2405	diacylglycerol acyltransferase (1-18:0, 2-18:1, 3-16:0), lipid particle	palmitoyl-CoA [lipid particle] + diglyceride (1-18:0, 2-18:1) [lipid particle] -> coenzyme A [lipid particle] + triglyceride (1-18:0, 2-18:1, 3-16:0) [lipid particle]	YOR245C	0	Inf	0		22345606		YOR245C
r_2406	diacylglycerol acyltransferase (1-18:1, 2-16:1, 3-16:0), lipid particle	palmitoyl-CoA [lipid particle] + diglyceride (1-18:1, 2-16:1) [lipid particle] -> coenzyme A [lipid particle] + triglyceride (1-18:1, 2-16:1, 3-16:0) [lipid particle]	YOR245C	0	Inf	0		22345606		YOR245C
r_2407	diacylglycerol acyltransferase (1-18:1, 2-18:1, 3-16:0), lipid particle	palmitoyl-CoA [lipid particle] + diglyceride (1-18:1, 2-18:1) [lipid particle] -> coenzyme A [lipid particle] + triglyceride (1-18:1, 2-18:1, 3-16:0) [lipid particle]	YOR245C	0	Inf	0		22345606		YOR245C
r_2408	diacylglycerol acyltransferase (1-16:0, 2-16:1, 3-16:1), lipid particle	palmitoleoyl-CoA [lipid particle] + diglyceride (1-16:0, 2-16:1) [lipid particle] -> coenzyme A [lipid particle] + triglyceride (1-16:0, 2-16:1, 3-16:1) [lipid particle]	YOR245C	0	Inf	0		22345606		YOR245C
r_2409	diacylglycerol acyltransferase (1-16:0, 2-18:1, 3-16:1), lipid particle	palmitoleoyl-CoA [lipid particle] + diglyceride (1-16:0, 2-18:1) [lipid particle] -> coenzyme A [lipid particle] + triglyceride (1-16:0, 2-18:1, 3-16:1) [lipid particle]	YOR245C	0	Inf	0		22345606		YOR245C
r_2410	diacylglycerol acyltransferase (1-16:1, 2-16:1, 3-16:1), lipid particle	palmitoleoyl-CoA [lipid particle] + diglyceride (1-16:1, 2-16:1) [lipid particle] -> coenzyme A [lipid particle] + triglyceride (1-16:1, 2-16:1, 3-16:1) [lipid particle]	YOR245C	0	Inf	0		22345606		YOR245C
r_2411	diacylglycerol acyltransferase (1-16:1, 2-18:1, 3-16:1), lipid particle	palmitoleoyl-CoA [lipid particle] + diglyceride (1-16:1, 2-18:1) [lipid particle] -> coenzyme A [lipid particle] + triglyceride (1-16:1, 2-18:1, 3-16:1) [lipid particle]	YOR245C	0	Inf	0		22345606		YOR245C
r_2412	diacylglycerol acyltransferase (1-18:0, 2-16:1, 3-16:1), lipid particle	palmitoleoyl-CoA [lipid particle] + diglyceride (1-18:0, 2-16:1) [lipid particle] -> coenzyme A [lipid particle] + triglyceride (1-18:0, 2-16:1, 3-16:1) [lipid particle]	YOR245C	0	Inf	0		22345606		YOR245C
r_2413	diacylglycerol acyltransferase (1-18:0, 2-18:1, 3-16:1), lipid particle	palmitoleoyl-CoA [lipid particle] + diglyceride (1-18:0, 2-18:1) [lipid particle] -> coenzyme A [lipid particle] + triglyceride (1-18:0, 2-18:1, 3-16:1) [lipid particle]	YOR245C	0	Inf	0		22345606		YOR245C
r_2414	diacylglycerol acyltransferase (1-18:1, 2-16:1, 3-16:1), lipid particle	palmitoleoyl-CoA [lipid particle] + diglyceride (1-18:1, 2-16:1) [lipid particle] -> coenzyme A [lipid particle] + triglyceride (1-18:1, 2-16:1, 3-16:1) [lipid particle]	YOR245C	0	Inf	0		22345606		YOR245C
r_2415	diacylglycerol acyltransferase (1-18:1, 2-18:1, 3-16:1), lipid particle	palmitoleoyl-CoA [lipid particle] + diglyceride (1-18:1, 2-18:1) [lipid particle] -> coenzyme A [lipid particle] + triglyceride (1-18:1, 2-18:1, 3-16:1) [lipid particle]	YOR245C	0	Inf	0		22345606		YOR245C
r_2416	diacylglycerol acyltransferase (1-16:0, 2-16:1, 3-18:0), lipid particle	stearoyl-CoA [lipid particle] + diglyceride (1-16:0, 2-16:1) [lipid particle] -> coenzyme A [lipid particle] + triglyceride (1-16:0, 2-16:1, 3-18:0) [lipid particle]	YOR245C	0	Inf	0		22345606		YOR245C
r_2417	diacylglycerol acyltransferase (1-16:0, 2-18:1, 3-18:0), lipid particle	stearoyl-CoA [lipid particle] + diglyceride (1-16:0, 2-18:1) [lipid particle] -> coenzyme A [lipid particle] + triglyceride (1-16:0, 2-18:1, 3-18:0) [lipid particle]	YOR245C	0	Inf	0		22345606		YOR245C
r_2418	diacylglycerol acyltransferase (1-16:1, 2-16:1, 3-18:0), lipid particle	stearoyl-CoA [lipid particle] + diglyceride (1-16:1, 2-16:1) [lipid particle] -> coenzyme A [lipid particle] + triglyceride (1-16:1, 2-16:1, 3-18:0) [lipid particle]	YOR245C	0	Inf	0		22345606		YOR245C
r_2419	diacylglycerol acyltransferase (1-16:1, 2-18:1, 3-18:0), lipid particle	stearoyl-CoA [lipid particle] + diglyceride (1-16:1, 2-18:1) [lipid particle] -> coenzyme A [lipid particle] + triglyceride (1-16:1, 2-18:1, 3-18:0) [lipid particle]	YOR245C	0	Inf	0		22345606		YOR245C
r_2420	diacylglycerol acyltransferase (1-18:0, 2-16:1, 3-18:0), lipid particle	stearoyl-CoA [lipid particle] + diglyceride (1-18:0, 2-16:1) [lipid particle] -> coenzyme A [lipid particle] + triglyceride (1-18:0, 2-16:1, 3-18:0) [lipid particle]	YOR245C	0	Inf	0		22345606		YOR245C
r_2421	diacylglycerol acyltransferase (1-18:0, 2-18:1, 3-18:0), lipid particle	stearoyl-CoA [lipid particle] + diglyceride (1-18:0, 2-18:1) [lipid particle] -> coenzyme A [lipid particle] + triglyceride (1-18:0, 2-18:1, 3-18:0) [lipid particle]	YOR245C	0	Inf	0		22345606		YOR245C
r_2422	diacylglycerol acyltransferase (1-18:1, 2-16:1, 3-18:0), lipid particle	stearoyl-CoA [lipid particle] + diglyceride (1-18:1, 2-16:1) [lipid particle] -> coenzyme A [lipid particle] + triglyceride (1-18:1, 2-16:1, 3-18:0) [lipid particle]	YOR245C	0	Inf	0		22345606		YOR245C
r_2423	diacylglycerol acyltransferase (1-18:1, 2-18:1, 3-18:0), lipid particle	stearoyl-CoA [lipid particle] + diglyceride (1-18:1, 2-18:1) [lipid particle] -> coenzyme A [lipid particle] + triglyceride (1-18:1, 2-18:1, 3-18:0) [lipid particle]	YOR245C	0	Inf	0		22345606		YOR245C
r_2424	diacylglycerol acyltransferase (1-16:0, 2-16:1, 3-18:1), lipid particle	oleoyl-CoA [lipid particle] + diglyceride (1-16:0, 2-16:1) [lipid particle] -> coenzyme A [lipid particle] + triglyceride (1-16:0, 2-16:1, 3-18:1) [lipid particle]	YOR245C	0	Inf	0		22345606		YOR245C
r_2425	diacylglycerol acyltransferase (1-16:0, 2-18:1, 3-18:1), lipid particle	oleoyl-CoA [lipid particle] + diglyceride (1-16:0, 2-18:1) [lipid particle] -> coenzyme A [lipid particle] + triglyceride (1-16:0, 2-18:1, 3-18:1) [lipid particle]	YOR245C	0	Inf	0		22345606		YOR245C
r_2426	diacylglycerol acyltransferase (1-16:1, 2-16:1, 3-18:1), lipid particle	oleoyl-CoA [lipid particle] + diglyceride (1-16:1, 2-16:1) [lipid particle] -> coenzyme A [lipid particle] + triglyceride (1-16:1, 2-16:1, 3-18:1) [lipid particle]	YOR245C	0	Inf	0		22345606		YOR245C
r_2427	diacylglycerol acyltransferase (1-16:1, 2-18:1, 3-18:1), lipid particle	oleoyl-CoA [lipid particle] + diglyceride (1-16:1, 2-18:1) [lipid particle] -> coenzyme A [lipid particle] + triglyceride (1-16:1, 2-18:1, 3-18:1) [lipid particle]	YOR245C	0	Inf	0		22345606		YOR245C
r_2428	diacylglycerol acyltransferase (1-18:0, 2-16:1, 3-18:1), lipid particle	oleoyl-CoA [lipid particle] + diglyceride (1-18:0, 2-16:1) [lipid particle] -> coenzyme A [lipid particle] + triglyceride (1-18:0, 2-16:1, 3-18:1) [lipid particle]	YOR245C	0	Inf	0		22345606		YOR245C
r_2429	diacylglycerol acyltransferase (1-18:0, 2-18:1, 3-18:1), lipid particle	oleoyl-CoA [lipid particle] + diglyceride (1-18:0, 2-18:1) [lipid particle] -> coenzyme A [lipid particle] + triglyceride (1-18:0, 2-18:1, 3-18:1) [lipid particle]	YOR245C	0	Inf	0		22345606		YOR245C
r_2430	diacylglycerol acyltransferase (1-18:1, 2-16:1, 3-18:1), lipid particle	oleoyl-CoA [lipid particle] + diglyceride (1-18:1, 2-16:1) [lipid particle] -> coenzyme A [lipid particle] + triglyceride (1-18:1, 2-16:1, 3-18:1) [lipid particle]	YOR245C	0	Inf	0		22345606		YOR245C
r_2431	diacylglycerol acyltransferase (1-18:1, 2-18:1, 3-18:1), lipid particle	oleoyl-CoA [lipid particle] + diglyceride (1-18:1, 2-18:1) [lipid particle] -> coenzyme A [lipid particle] + triglyceride (1-18:1, 2-18:1, 3-18:1) [lipid particle]	YOR245C	0	Inf	0		22345606		YOR245C
r_2432	CDP-diacylglycerol synthase (1-16:0, 2-16:1), ER membrane	H+ [endoplasmic reticulum membrane] + phosphatidate (1-16:0, 2-16:1) [endoplasmic reticulum membrane] + CTP [endoplasmic reticulum membrane] <=> diphosphate [endoplasmic reticulum membrane] + CDP-diacylglycerol (1-16:0, 2-16:1) [endoplasmic reticulum membrane]	YBR029C	-Inf	Inf	0		22345606		YBR029C
r_2433	CDP-diacylglycerol synthase (1-16:1, 2-16:1), ER membrane	H+ [endoplasmic reticulum membrane] + phosphatidate (1-16:1, 2-16:1) [endoplasmic reticulum membrane] + CTP [endoplasmic reticulum membrane] <=> diphosphate [endoplasmic reticulum membrane] + CDP-diacylglycerol (1-16:1, 2-16:1) [endoplasmic reticulum membrane]	YBR029C	-Inf	Inf	0		22345606		YBR029C
r_2434	CDP-diacylglycerol synthase (1-18:0, 2-16:1), ER membrane	H+ [endoplasmic reticulum membrane] + phosphatidate (1-18:0, 2-16:1) [endoplasmic reticulum membrane] + CTP [endoplasmic reticulum membrane] <=> diphosphate [endoplasmic reticulum membrane] + CDP-diacylglycerol (1-18:0, 2-16:1) [endoplasmic reticulum membrane]	YBR029C	-Inf	Inf	0		22345606		YBR029C
r_2435	CDP-diacylglycerol synthase (1-18:1, 2-16:1), ER membrane	H+ [endoplasmic reticulum membrane] + phosphatidate (1-18:1, 2-16:1) [endoplasmic reticulum membrane] + CTP [endoplasmic reticulum membrane] <=> diphosphate [endoplasmic reticulum membrane] + CDP-diacylglycerol (1-18:1, 2-16:1) [endoplasmic reticulum membrane]	YBR029C	-Inf	Inf	0		22345606		YBR029C
r_2436	CDP-diacylglycerol synthase (1-16:0, 2-18:1), ER membrane	H+ [endoplasmic reticulum membrane] + phosphatidate (1-16:0, 2-18:1) [endoplasmic reticulum membrane] + CTP [endoplasmic reticulum membrane] <=> diphosphate [endoplasmic reticulum membrane] + CDP-diacylglycerol (1-16:0, 2-18:1) [endoplasmic reticulum membrane]	YBR029C	-Inf	Inf	0		22345606		YBR029C
r_2437	CDP-diacylglycerol synthase (1-16:1, 2-18:1), ER membrane	H+ [endoplasmic reticulum membrane] + phosphatidate (1-16:1, 2-18:1) [endoplasmic reticulum membrane] + CTP [endoplasmic reticulum membrane] <=> diphosphate [endoplasmic reticulum membrane] + CDP-diacylglycerol (1-16:1, 2-18:1) [endoplasmic reticulum membrane]	YBR029C	-Inf	Inf	0		22345606		YBR029C
r_2438	CDP-diacylglycerol synthase (1-18:0, 2-18:1), ER membrane	H+ [endoplasmic reticulum membrane] + phosphatidate (1-18:0, 2-18:1) [endoplasmic reticulum membrane] + CTP [endoplasmic reticulum membrane] <=> diphosphate [endoplasmic reticulum membrane] + CDP-diacylglycerol (1-18:0, 2-18:1) [endoplasmic reticulum membrane]	YBR029C	-Inf	Inf	0		22345606		YBR029C
r_2439	CDP-diacylglycerol synthase (1-18:1, 2-18:1), ER membrane	H+ [endoplasmic reticulum membrane] + phosphatidate (1-18:1, 2-18:1) [endoplasmic reticulum membrane] + CTP [endoplasmic reticulum membrane] <=> diphosphate [endoplasmic reticulum membrane] + CDP-diacylglycerol (1-18:1, 2-18:1) [endoplasmic reticulum membrane]	YBR029C	-Inf	Inf	0		22345606		YBR029C
r_2440	CDP-diacylglycerol synthase (1-16:0, 2-16:1), mitochondrial membrane	phosphatidate (1-16:0, 2-16:1) [mitochondrial membrane] + CTP [mitochondrial membrane] + H+ [mitochondrial membrane] <=> diphosphate [mitochondrial membrane] + CDP-diacylglycerol (1-16:0, 2-16:1) [mitochondrial membrane]	YBR029C	-Inf	Inf	0		22345606		YBR029C
r_2441	CDP-diacylglycerol synthase (1-16:1, 2-16:1), mitochondrial membrane	CTP [mitochondrial membrane] + H+ [mitochondrial membrane] + phosphatidate (1-16:1, 2-16:1) [mitochondrial membrane] <=> diphosphate [mitochondrial membrane] + CDP-diacylglycerol (1-16:1, 2-16:1) [mitochondrial membrane]	YBR029C	-Inf	Inf	0		22345606		YBR029C
r_2442	CDP-diacylglycerol synthase (1-18:0, 2-16:1), mitochondrial membrane	CTP [mitochondrial membrane] + H+ [mitochondrial membrane] + phosphatidate (1-18:0, 2-16:1) [mitochondrial membrane] <=> diphosphate [mitochondrial membrane] + CDP-diacylglycerol (1-18:0, 2-16:1) [mitochondrial membrane]	YBR029C	-Inf	Inf	0		22345606		YBR029C
r_2443	CDP-diacylglycerol synthase (1-18:1, 2-16:1), mitochondrial membrane	CTP [mitochondrial membrane] + H+ [mitochondrial membrane] + phosphatidate (1-18:1, 2-16:1) [mitochondrial membrane] <=> diphosphate [mitochondrial membrane] + CDP-diacylglycerol (1-18:1, 2-16:1) [mitochondrial membrane]	YBR029C	-Inf	Inf	0		22345606		YBR029C
r_2444	CDP-diacylglycerol synthase (1-16:0, 2-18:1), mitochondrial membrane	CTP [mitochondrial membrane] + H+ [mitochondrial membrane] + phosphatidate (1-16:0, 2-18:1) [mitochondrial membrane] <=> diphosphate [mitochondrial membrane] + CDP-diacylglycerol (1-16:0, 2-18:1) [mitochondrial membrane]	YBR029C	-Inf	Inf	0		22345606		YBR029C
r_2445	CDP-diacylglycerol synthase (1-16:1, 2-18:1), mitochondrial membrane	CTP [mitochondrial membrane] + H+ [mitochondrial membrane] + phosphatidate (1-16:1, 2-18:1) [mitochondrial membrane] <=> diphosphate [mitochondrial membrane] + CDP-diacylglycerol (1-16:1, 2-18:1) [mitochondrial membrane]	YBR029C	-Inf	Inf	0		22345606		YBR029C
r_2446	PS synthase (1-16:0, 2-16:1), ER membrane	CDP-diacylglycerol (1-16:0, 2-16:1) [endoplasmic reticulum membrane] + L-serine [endoplasmic reticulum membrane] -> H+ [endoplasmic reticulum membrane] + CMP [endoplasmic reticulum membrane] + phosphatidyl-L-serine (1-16:0, 2-16:1) [endoplasmic reticulum membrane]	YER026C	0	Inf	0		22345606		YER026C
r_2447	PS synthase (1-16:1, 2-16:1), ER membrane	CDP-diacylglycerol (1-16:1, 2-16:1) [endoplasmic reticulum membrane] + L-serine [endoplasmic reticulum membrane] -> H+ [endoplasmic reticulum membrane] + CMP [endoplasmic reticulum membrane] + phosphatidyl-L-serine (1-16:1, 2-16:1) [endoplasmic reticulum membrane]	YER026C	0	Inf	0		22345606		YER026C
r_2448	PS synthase (1-18:0, 2-16:1), ER membrane	CDP-diacylglycerol (1-18:0, 2-16:1) [endoplasmic reticulum membrane] + L-serine [endoplasmic reticulum membrane] -> H+ [endoplasmic reticulum membrane] + CMP [endoplasmic reticulum membrane] + phosphatidyl-L-serine (1-18:0, 2-16:1) [endoplasmic reticulum membrane]	YER026C	0	Inf	0		22345606		YER026C
r_2449	PS synthase (1-18:1, 2-16:1), ER membrane	CDP-diacylglycerol (1-18:1, 2-16:1) [endoplasmic reticulum membrane] + L-serine [endoplasmic reticulum membrane] -> H+ [endoplasmic reticulum membrane] + CMP [endoplasmic reticulum membrane] + phosphatidyl-L-serine (1-18:1, 2-16:1) [endoplasmic reticulum membrane]	YER026C	0	Inf	0		22345606		YER026C
r_2450	PS synthase (1-16:0, 2-18:1), ER membrane	CDP-diacylglycerol (1-16:0, 2-18:1) [endoplasmic reticulum membrane] + L-serine [endoplasmic reticulum membrane] -> H+ [endoplasmic reticulum membrane] + CMP [endoplasmic reticulum membrane] + phosphatidyl-L-serine (1-16:0, 2-18:1) [endoplasmic reticulum membrane]	YER026C	0	Inf	0		22345606		YER026C
r_2451	PS synthase (1-16:1, 2-18:1), ER membrane	CDP-diacylglycerol (1-16:1, 2-18:1) [endoplasmic reticulum membrane] + L-serine [endoplasmic reticulum membrane] -> H+ [endoplasmic reticulum membrane] + CMP [endoplasmic reticulum membrane] + phosphatidyl-L-serine (1-16:1, 2-18:1) [endoplasmic reticulum membrane]	YER026C	0	Inf	0		22345606		YER026C
r_2452	PS synthase (1-18:0, 2-18:1), ER membrane	CDP-diacylglycerol (1-18:0, 2-18:1) [endoplasmic reticulum membrane] + L-serine [endoplasmic reticulum membrane] -> H+ [endoplasmic reticulum membrane] + CMP [endoplasmic reticulum membrane] + phosphatidyl-L-serine (1-18:0, 2-18:1) [endoplasmic reticulum membrane]	YER026C	0	Inf	0		22345606		YER026C
r_2453	PS synthase (1-18:1, 2-18:1), ER membrane	CDP-diacylglycerol (1-18:1, 2-18:1) [endoplasmic reticulum membrane] + L-serine [endoplasmic reticulum membrane] -> H+ [endoplasmic reticulum membrane] + CMP [endoplasmic reticulum membrane] + phosphatidyl-L-serine (1-18:1, 2-18:1) [endoplasmic reticulum membrane]	YER026C	0	Inf	0		22345606		YER026C
r_2454	PI synthase (1-16:0, 2-16:1), ER membrane	CDP-diacylglycerol (1-16:0, 2-16:1) [endoplasmic reticulum membrane] + myo-inositol [endoplasmic reticulum membrane] -> H+ [endoplasmic reticulum membrane] + CMP [endoplasmic reticulum membrane] + 1-phosphatidyl-1D-myo-inositol (1-16:0, 2-16:1) [endoplasmic reticulum membrane]	YPR113W	0	Inf	0		22345606		YPR113W
r_2455	PI synthase (1-16:1, 2-16:1), ER membrane	CDP-diacylglycerol (1-16:1, 2-16:1) [endoplasmic reticulum membrane] + myo-inositol [endoplasmic reticulum membrane] -> H+ [endoplasmic reticulum membrane] + CMP [endoplasmic reticulum membrane] + 1-phosphatidyl-1D-myo-inositol (1-16:1, 2-16:1) [endoplasmic reticulum membrane]	YPR113W	0	Inf	0		22345606		YPR113W
r_2456	PI synthase (1-18:0, 2-16:1), ER membrane	CDP-diacylglycerol (1-18:0, 2-16:1) [endoplasmic reticulum membrane] + myo-inositol [endoplasmic reticulum membrane] -> H+ [endoplasmic reticulum membrane] + CMP [endoplasmic reticulum membrane] + 1-phosphatidyl-1D-myo-inositol (1-18:0, 2-16:1) [endoplasmic reticulum membrane]	YPR113W	0	Inf	0		22345606		YPR113W
r_2457	PI synthase (1-18:1, 2-16:1), ER membrane	CDP-diacylglycerol (1-18:1, 2-16:1) [endoplasmic reticulum membrane] + myo-inositol [endoplasmic reticulum membrane] -> H+ [endoplasmic reticulum membrane] + CMP [endoplasmic reticulum membrane] + 1-phosphatidyl-1D-myo-inositol (1-18:1, 2-16:1) [endoplasmic reticulum membrane]	YPR113W	0	Inf	0		22345606		YPR113W
r_2458	PI synthase (1-16:0, 2-18:1), ER membrane	CDP-diacylglycerol (1-16:0, 2-18:1) [endoplasmic reticulum membrane] + myo-inositol [endoplasmic reticulum membrane] -> H+ [endoplasmic reticulum membrane] + CMP [endoplasmic reticulum membrane] + 1-phosphatidyl-1D-myo-inositol (1-16:0, 2-18:1) [endoplasmic reticulum membrane]	YPR113W	0	Inf	0		22345606		YPR113W
r_2459	PI synthase (1-16:1, 2-18:1), ER membrane	CDP-diacylglycerol (1-16:1, 2-18:1) [endoplasmic reticulum membrane] + myo-inositol [endoplasmic reticulum membrane] -> H+ [endoplasmic reticulum membrane] + CMP [endoplasmic reticulum membrane] + 1-phosphatidyl-1D-myo-inositol (1-16:1, 2-18:1) [endoplasmic reticulum membrane]	YPR113W	0	Inf	0		22345606		YPR113W
r_2460	PI synthase (1-18:0, 2-18:1), ER membrane	CDP-diacylglycerol (1-18:0, 2-18:1) [endoplasmic reticulum membrane] + myo-inositol [endoplasmic reticulum membrane] -> H+ [endoplasmic reticulum membrane] + CMP [endoplasmic reticulum membrane] + 1-phosphatidyl-1D-myo-inositol (1-18:0, 2-18:1) [endoplasmic reticulum membrane]	YPR113W	0	Inf	0		22345606		YPR113W
r_2461	PI synthase (1-18:1, 2-18:1), ER membrane	CDP-diacylglycerol (1-18:1, 2-18:1) [endoplasmic reticulum membrane] + myo-inositol [endoplasmic reticulum membrane] -> H+ [endoplasmic reticulum membrane] + CMP [endoplasmic reticulum membrane] + 1-phosphatidyl-1D-myo-inositol (1-18:1, 2-18:1) [endoplasmic reticulum membrane]	YPR113W	0	Inf	0		22345606		YPR113W
r_2462	lysoPI acyltransferase (1-18:0, 2-16:1), ER membrane	stearoyl-CoA [endoplasmic reticulum membrane] + sn-2-acyl-1-lysophosphatidylinositol (16:1) [endoplasmic reticulum membrane] <=> coenzyme A [endoplasmic reticulum membrane] + 1-phosphatidyl-1D-myo-inositol (1-18:0, 2-16:1) [endoplasmic reticulum membrane]	YBR042C	-Inf	Inf	0		22345606		YBR042C
r_2463	lysoPI acyltransferase (1-18:0, 2-18:1), ER membrane	stearoyl-CoA [endoplasmic reticulum membrane] + sn-2-acyl-1-lysophosphatidylinositol (18:1) [endoplasmic reticulum membrane] <=> coenzyme A [endoplasmic reticulum membrane] + 1-phosphatidyl-1D-myo-inositol (1-18:0, 2-18:1) [endoplasmic reticulum membrane]	YBR042C	-Inf	Inf	0		22345606		YBR042C
r_2464	PS decarboxylase (1-16:0, 2-16:1), mitochondrial membrane	H+ [mitochondrial membrane] + phosphatidyl-L-serine (1-16:0, 2-16:1) [mitochondrial membrane] -> carbon dioxide [mitochondrial membrane] + phosphatidylethanolamine (1-16:0, 2-16:1) [mitochondrial membrane]	YNL169C	0	Inf	0		22345606		YNL169C
r_2465	PS decarboxylase (1-16:1, 2-16:1), mitochondrial membrane	H+ [mitochondrial membrane] + phosphatidyl-L-serine (1-16:1, 2-16:1) [mitochondrial membrane] -> carbon dioxide [mitochondrial membrane] + phosphatidylethanolamine (1-16:1, 2-16:1) [mitochondrial membrane]	YNL169C	0	Inf	0		22345606		YNL169C
r_2466	PS decarboxylase (1-18:0, 2-16:1), mitochondrial membrane	H+ [mitochondrial membrane] + phosphatidyl-L-serine (1-18:0, 2-16:1) [mitochondrial membrane] -> carbon dioxide [mitochondrial membrane] + phosphatidylethanolamine (1-18:0, 2-16:1) [mitochondrial membrane]	YNL169C	0	Inf	0		22345606		YNL169C
r_2467	PS decarboxylase (1-18:1, 2-16:1), mitochondrial membrane	H+ [mitochondrial membrane] + phosphatidyl-L-serine (1-18:1, 2-16:1) [mitochondrial membrane] -> carbon dioxide [mitochondrial membrane] + phosphatidylethanolamine (1-18:1, 2-16:1) [mitochondrial membrane]	YNL169C	0	Inf	0		22345606		YNL169C
r_2468	PS decarboxylase (1-16:0, 2-18:1), mitochondrial membrane	H+ [mitochondrial membrane] + phosphatidyl-L-serine (1-16:0, 2-18:1) [mitochondrial membrane] -> carbon dioxide [mitochondrial membrane] + phosphatidylethanolamine (1-16:0, 2-18:1) [mitochondrial membrane]	YNL169C	0	Inf	0		22345606		YNL169C
r_2469	PS decarboxylase (1-16:1, 2-18:1), mitochondrial membrane	H+ [mitochondrial membrane] + phosphatidyl-L-serine (1-16:1, 2-18:1) [mitochondrial membrane] -> carbon dioxide [mitochondrial membrane] + phosphatidylethanolamine (1-16:1, 2-18:1) [mitochondrial membrane]	YNL169C	0	Inf	0		22345606		YNL169C
r_2470	PS decarboxylase (1-18:0, 2-18:1), mitochondrial membrane	H+ [mitochondrial membrane] + phosphatidyl-L-serine (1-18:0, 2-18:1) [mitochondrial membrane] -> carbon dioxide [mitochondrial membrane] + phosphatidylethanolamine (1-18:0, 2-18:1) [mitochondrial membrane]	YNL169C	0	Inf	0		22345606		YNL169C
r_2471	PS decarboxylase (1-18:1, 2-18:1), mitochondrial membrane	H+ [mitochondrial membrane] + phosphatidyl-L-serine (1-18:1, 2-18:1) [mitochondrial membrane] -> carbon dioxide [mitochondrial membrane] + phosphatidylethanolamine (1-18:1, 2-18:1) [mitochondrial membrane]	YNL169C	0	Inf	0		22345606		YNL169C
r_2472	PS decarboxylase (1-16:0, 2-16:1), Golgi membrane	phosphatidyl-L-serine (1-16:0, 2-16:1) [Golgi membrane] + H+ [Golgi membrane] -> carbon dioxide [Golgi membrane] + phosphatidylethanolamine (1-16:0, 2-16:1) [Golgi membrane]	YGR170W	0	Inf	0		22345606		YGR170W
r_2473	PS decarboxylase (1-16:1, 2-16:1), Golgi membrane	H+ [Golgi membrane] + phosphatidyl-L-serine (1-16:1, 2-16:1) [Golgi membrane] -> carbon dioxide [Golgi membrane] + phosphatidylethanolamine (1-16:1, 2-16:1) [Golgi membrane]	YGR170W	0	Inf	0		22345606		YGR170W
r_2474	PS decarboxylase (1-18:0, 2-16:1), Golgi membrane	H+ [Golgi membrane] + phosphatidyl-L-serine (1-18:0, 2-16:1) [Golgi membrane] -> carbon dioxide [Golgi membrane] + phosphatidylethanolamine (1-18:0, 2-16:1) [Golgi membrane]	YGR170W	0	Inf	0		22345606		YGR170W
r_2475	PS decarboxylase (1-18:1, 2-16:1), Golgi membrane	H+ [Golgi membrane] + phosphatidyl-L-serine (1-18:1, 2-16:1) [Golgi membrane] -> carbon dioxide [Golgi membrane] + phosphatidylethanolamine (1-18:1, 2-16:1) [Golgi membrane]	YGR170W	0	Inf	0		22345606		YGR170W
r_2476	PS decarboxylase (1-16:0, 2-18:1), Golgi membrane	H+ [Golgi membrane] + phosphatidyl-L-serine (1-16:0, 2-18:1) [Golgi membrane] -> carbon dioxide [Golgi membrane] + phosphatidylethanolamine (1-16:0, 2-18:1) [Golgi membrane]	YGR170W	0	Inf	0		22345606		YGR170W
r_2477	PS decarboxylase (1-16:1, 2-18:1), Golgi membrane	H+ [Golgi membrane] + phosphatidyl-L-serine (1-16:1, 2-18:1) [Golgi membrane] -> carbon dioxide [Golgi membrane] + phosphatidylethanolamine (1-16:1, 2-18:1) [Golgi membrane]	YGR170W	0	Inf	0		22345606		YGR170W
r_2478	PS decarboxylase (1-18:0, 2-18:1), Golgi membrane	H+ [Golgi membrane] + phosphatidyl-L-serine (1-18:0, 2-18:1) [Golgi membrane] -> carbon dioxide [Golgi membrane] + phosphatidylethanolamine (1-18:0, 2-18:1) [Golgi membrane]	YGR170W	0	Inf	0		22345606		YGR170W
r_2479	PS decarboxylase (1-18:1, 2-18:1), Golgi membrane	H+ [Golgi membrane] + phosphatidyl-L-serine (1-18:1, 2-18:1) [Golgi membrane] -> carbon dioxide [Golgi membrane] + phosphatidylethanolamine (1-18:1, 2-18:1) [Golgi membrane]	YGR170W	0	Inf	0		22345606		YGR170W
r_2480	PS decarboxylase (1-16:0, 2-16:1), vacuolar membrane	phosphatidyl-L-serine (1-16:0, 2-16:1) [vacuolar membrane] + H+ [vacuolar membrane] -> carbon dioxide [vacuolar membrane] + phosphatidylethanolamine (1-16:0, 2-16:1) [vacuolar membrane]	YGR170W	0	Inf	0		22345606		YGR170W
r_2481	PS decarboxylase (1-16:1, 2-16:1), vacuolar membrane	H+ [vacuolar membrane] + phosphatidyl-L-serine (1-16:1, 2-16:1) [vacuolar membrane] -> carbon dioxide [vacuolar membrane] + phosphatidylethanolamine (1-16:1, 2-16:1) [vacuolar membrane]	YGR170W	0	Inf	0		22345606		YGR170W
r_2482	PS decarboxylase (1-18:0, 2-16:1), vacuolar membrane	H+ [vacuolar membrane] + phosphatidyl-L-serine (1-18:0, 2-16:1) [vacuolar membrane] -> carbon dioxide [vacuolar membrane] + phosphatidylethanolamine (1-18:0, 2-16:1) [vacuolar membrane]	YGR170W	0	Inf	0		22345606		YGR170W
r_2483	PS decarboxylase (1-18:1, 2-16:1), vacuolar membrane	H+ [vacuolar membrane] + phosphatidyl-L-serine (1-18:1, 2-16:1) [vacuolar membrane] -> carbon dioxide [vacuolar membrane] + phosphatidylethanolamine (1-18:1, 2-16:1) [vacuolar membrane]	YGR170W	0	Inf	0		22345606		YGR170W
r_2484	PS decarboxylase (1-16:0, 2-18:1), vacuolar membrane	H+ [vacuolar membrane] + phosphatidyl-L-serine (1-16:0, 2-18:1) [vacuolar membrane] -> carbon dioxide [vacuolar membrane] + phosphatidylethanolamine (1-16:0, 2-18:1) [vacuolar membrane]	YGR170W	0	Inf	0		22345606		YGR170W
r_2485	PS decarboxylase (1-16:1, 2-18:1), vacuolar membrane	H+ [vacuolar membrane] + phosphatidyl-L-serine (1-16:1, 2-18:1) [vacuolar membrane] -> carbon dioxide [vacuolar membrane] + phosphatidylethanolamine (1-16:1, 2-18:1) [vacuolar membrane]	YGR170W	0	Inf	0		22345606		YGR170W
r_2486	PS decarboxylase (1-18:0, 2-18:1), vacuolar membrane	H+ [vacuolar membrane] + phosphatidyl-L-serine (1-18:0, 2-18:1) [vacuolar membrane] -> carbon dioxide [vacuolar membrane] + phosphatidylethanolamine (1-18:0, 2-18:1) [vacuolar membrane]	YGR170W	0	Inf	0		22345606		YGR170W
r_2487	PS decarboxylase (1-18:1, 2-18:1), vacuolar membrane	H+ [vacuolar membrane] + phosphatidyl-L-serine (1-18:1, 2-18:1) [vacuolar membrane] -> carbon dioxide [vacuolar membrane] + phosphatidylethanolamine (1-18:1, 2-18:1) [vacuolar membrane]	YGR170W	0	Inf	0		22345606		YGR170W
r_2488	PE methyltransferase (1-16:0, 2-16:1), ER membrane	phosphatidylethanolamine (1-16:0, 2-16:1) [endoplasmic reticulum membrane] + S-adenosyl-L-methionine [endoplasmic reticulum membrane] -> H+ [endoplasmic reticulum membrane] + S-adenosyl-L-homocysteine [endoplasmic reticulum membrane] + phosphatidyl-N-methylethanolamine (1-16:0, 2-16:1) [endoplasmic reticulum membrane]	( YGR157W or YJR073C )	0	Inf	0		22345606		[['YGR157W', 'YJR073C']]
r_2489	PE methyltransferase (1-16:1, 2-16:1), ER membrane	S-adenosyl-L-methionine [endoplasmic reticulum membrane] + phosphatidylethanolamine (1-16:1, 2-16:1) [endoplasmic reticulum membrane] -> H+ [endoplasmic reticulum membrane] + S-adenosyl-L-homocysteine [endoplasmic reticulum membrane] + phosphatidyl-N-methylethanolamine (1-16:1, 2-16:1) [endoplasmic reticulum membrane]	( YGR157W or YJR073C )	0	Inf	0		22345606		[['YGR157W', 'YJR073C']]
r_2490	PE methyltransferase (1-18:0, 2-16:1), ER membrane	S-adenosyl-L-methionine [endoplasmic reticulum membrane] + phosphatidylethanolamine (1-18:0, 2-16:1) [endoplasmic reticulum membrane] -> H+ [endoplasmic reticulum membrane] + S-adenosyl-L-homocysteine [endoplasmic reticulum membrane] + phosphatidyl-N-methylethanolamine (1-18:0, 2-16:1) [endoplasmic reticulum membrane]	( YGR157W or YJR073C )	0	Inf	0		22345606		[['YGR157W', 'YJR073C']]
r_2491	PE methyltransferase (1-18:1, 2-16:1), ER membrane	S-adenosyl-L-methionine [endoplasmic reticulum membrane] + phosphatidylethanolamine (1-18:1, 2-16:1) [endoplasmic reticulum membrane] -> H+ [endoplasmic reticulum membrane] + S-adenosyl-L-homocysteine [endoplasmic reticulum membrane] + phosphatidyl-N-methylethanolamine (1-18:1, 2-16:1) [endoplasmic reticulum membrane]	( YGR157W or YJR073C )	0	Inf	0		22345606		[['YGR157W', 'YJR073C']]
r_2492	PE methyltransferase (1-16:0, 2-18:1), ER membrane	S-adenosyl-L-methionine [endoplasmic reticulum membrane] + phosphatidylethanolamine (1-16:0, 2-18:1) [endoplasmic reticulum membrane] -> H+ [endoplasmic reticulum membrane] + S-adenosyl-L-homocysteine [endoplasmic reticulum membrane] + phosphatidyl-N-methylethanolamine (1-16:0, 2-18:1) [endoplasmic reticulum membrane]	( YGR157W or YJR073C )	0	Inf	0		22345606		[['YGR157W', 'YJR073C']]
r_2493	PE methyltransferase (1-16:1, 2-18:1), ER membrane	S-adenosyl-L-methionine [endoplasmic reticulum membrane] + phosphatidylethanolamine (1-16:1, 2-18:1) [endoplasmic reticulum membrane] -> H+ [endoplasmic reticulum membrane] + S-adenosyl-L-homocysteine [endoplasmic reticulum membrane] + phosphatidyl-N-methylethanolamine (1-16:1, 2-18:1) [endoplasmic reticulum membrane]	( YGR157W or YJR073C )	0	Inf	0		22345606		[['YGR157W', 'YJR073C']]
r_2494	PE methyltransferase (1-18:0, 2-18:1), ER membrane	S-adenosyl-L-methionine [endoplasmic reticulum membrane] + phosphatidylethanolamine (1-18:0, 2-18:1) [endoplasmic reticulum membrane] -> H+ [endoplasmic reticulum membrane] + S-adenosyl-L-homocysteine [endoplasmic reticulum membrane] + phosphatidyl-N-methylethanolamine (1-18:0, 2-18:1) [endoplasmic reticulum membrane]	( YGR157W or YJR073C )	0	Inf	0		22345606		[['YGR157W', 'YJR073C']]
r_2495	PE methyltransferase (1-18:1, 2-18:1), ER membrane	S-adenosyl-L-methionine [endoplasmic reticulum membrane] + phosphatidylethanolamine (1-18:1, 2-18:1) [endoplasmic reticulum membrane] -> H+ [endoplasmic reticulum membrane] + S-adenosyl-L-homocysteine [endoplasmic reticulum membrane] + phosphatidyl-N-methylethanolamine (1-18:1, 2-18:1) [endoplasmic reticulum membrane]	( YGR157W or YJR073C )	0	Inf	0		22345606		[['YGR157W', 'YJR073C']]
r_2496	phosphatidyl-N-methylethanolamine methyltransferase (1-16:0, 2-16:1), ER membrane	S-adenosyl-L-methionine [endoplasmic reticulum membrane] + phosphatidyl-N-methylethanolamine (1-16:0, 2-16:1) [endoplasmic reticulum membrane] -> H+ [endoplasmic reticulum membrane] + S-adenosyl-L-homocysteine [endoplasmic reticulum membrane] + phosphatidyl-N,N-dimethylethanolamine (1-16:0, 2-16:1) [endoplasmic reticulum membrane]	YJR073C	0	Inf	0		22345606		YJR073C
r_2497	phosphatidyl-N-methylethanolamine methyltransferase (1-16:1, 2-16:1), ER membrane	S-adenosyl-L-methionine [endoplasmic reticulum membrane] + phosphatidyl-N-methylethanolamine (1-16:1, 2-16:1) [endoplasmic reticulum membrane] -> H+ [endoplasmic reticulum membrane] + S-adenosyl-L-homocysteine [endoplasmic reticulum membrane] + phosphatidyl-N,N-dimethylethanolamine (1-16:1, 2-16:1) [endoplasmic reticulum membrane]	YJR073C	0	Inf	0		22345606		YJR073C
r_2498	phosphatidyl-N-methylethanolamine methyltransferase (1-18:0, 2-16:1), ER membrane	S-adenosyl-L-methionine [endoplasmic reticulum membrane] + phosphatidyl-N-methylethanolamine (1-18:0, 2-16:1) [endoplasmic reticulum membrane] -> H+ [endoplasmic reticulum membrane] + S-adenosyl-L-homocysteine [endoplasmic reticulum membrane] + phosphatidyl-N,N-dimethylethanolamine (1-18:0, 2-16:1) [endoplasmic reticulum membrane]	YJR073C	0	Inf	0		22345606		YJR073C
r_2499	phosphatidyl-N-methylethanolamine methyltransferase (1-18:1, 2-16:1), ER membrane	S-adenosyl-L-methionine [endoplasmic reticulum membrane] + phosphatidyl-N-methylethanolamine (1-18:1, 2-16:1) [endoplasmic reticulum membrane] -> H+ [endoplasmic reticulum membrane] + S-adenosyl-L-homocysteine [endoplasmic reticulum membrane] + phosphatidyl-N,N-dimethylethanolamine (1-18:1, 2-16:1) [endoplasmic reticulum membrane]	YJR073C	0	Inf	0		22345606		YJR073C
r_2500	phosphatidyl-N-methylethanolamine methyltransferase (1-16:0, 2-18:1), ER membrane	S-adenosyl-L-methionine [endoplasmic reticulum membrane] + phosphatidyl-N-methylethanolamine (1-16:0, 2-18:1) [endoplasmic reticulum membrane] -> H+ [endoplasmic reticulum membrane] + S-adenosyl-L-homocysteine [endoplasmic reticulum membrane] + phosphatidyl-N,N-dimethylethanolamine (1-16:0, 2-18:1) [endoplasmic reticulum membrane]	YJR073C	0	Inf	0		22345606		YJR073C
r_2501	phosphatidyl-N-methylethanolamine methyltransferase (1-16:1, 2-18:1), ER membrane	S-adenosyl-L-methionine [endoplasmic reticulum membrane] + phosphatidyl-N-methylethanolamine (1-16:1, 2-18:1) [endoplasmic reticulum membrane] -> H+ [endoplasmic reticulum membrane] + S-adenosyl-L-homocysteine [endoplasmic reticulum membrane] + phosphatidyl-N,N-dimethylethanolamine (1-16:1, 2-18:1) [endoplasmic reticulum membrane]	YJR073C	0	Inf	0		22345606		YJR073C
r_2502	phosphatidyl-N-methylethanolamine methyltransferase (1-18:0, 2-18:1), ER membrane	S-adenosyl-L-methionine [endoplasmic reticulum membrane] + phosphatidyl-N-methylethanolamine (1-18:0, 2-18:1) [endoplasmic reticulum membrane] -> H+ [endoplasmic reticulum membrane] + S-adenosyl-L-homocysteine [endoplasmic reticulum membrane] + phosphatidyl-N,N-dimethylethanolamine (1-18:0, 2-18:1) [endoplasmic reticulum membrane]	YJR073C	0	Inf	0		22345606		YJR073C
r_2503	phosphatidyl-N-methylethanolamine methyltransferase (1-18:1, 2-18:1), ER membrane	S-adenosyl-L-methionine [endoplasmic reticulum membrane] + phosphatidyl-N-methylethanolamine (1-18:1, 2-18:1) [endoplasmic reticulum membrane] -> H+ [endoplasmic reticulum membrane] + S-adenosyl-L-homocysteine [endoplasmic reticulum membrane] + phosphatidyl-N,N-dimethylethanolamine (1-18:1, 2-18:1) [endoplasmic reticulum membrane]	YJR073C	0	Inf	0		22345606		YJR073C
r_2504	phosphatidyl-N,N-dimethylethanolamine methyltransferase (1-16:0, 2-16:1), ER membrane	S-adenosyl-L-methionine [endoplasmic reticulum membrane] + phosphatidyl-N,N-dimethylethanolamine (1-16:0, 2-16:1) [endoplasmic reticulum membrane] -> H+ [endoplasmic reticulum membrane] + S-adenosyl-L-homocysteine [endoplasmic reticulum membrane] + phosphatidylcholine (1-16:0, 2-16:1) [endoplasmic reticulum membrane]	YJR073C	0	Inf	0		22345606		YJR073C
r_2505	phosphatidyl-N,N-dimethylethanolamine methyltransferase (1-16:1, 2-16:1), ER membrane	S-adenosyl-L-methionine [endoplasmic reticulum membrane] + phosphatidyl-N,N-dimethylethanolamine (1-16:1, 2-16:1) [endoplasmic reticulum membrane] -> H+ [endoplasmic reticulum membrane] + S-adenosyl-L-homocysteine [endoplasmic reticulum membrane] + phosphatidylcholine (1-16:1, 2-16:1) [endoplasmic reticulum membrane]	YJR073C	0	Inf	0		22345606		YJR073C
r_2506	phosphatidyl-N,N-dimethylethanolamine methyltransferase (1-18:0, 2-16:1), ER membrane	S-adenosyl-L-methionine [endoplasmic reticulum membrane] + phosphatidyl-N,N-dimethylethanolamine (1-18:0, 2-16:1) [endoplasmic reticulum membrane] -> H+ [endoplasmic reticulum membrane] + S-adenosyl-L-homocysteine [endoplasmic reticulum membrane] + phosphatidylcholine (1-18:0, 2-16:1) [endoplasmic reticulum membrane]	YJR073C	0	Inf	0		22345606		YJR073C
r_2507	phosphatidyl-N,N-dimethylethanolamine methyltransferase (1-18:1, 2-16:1), ER membrane	S-adenosyl-L-methionine [endoplasmic reticulum membrane] + phosphatidyl-N,N-dimethylethanolamine (1-18:1, 2-16:1) [endoplasmic reticulum membrane] -> H+ [endoplasmic reticulum membrane] + S-adenosyl-L-homocysteine [endoplasmic reticulum membrane] + phosphatidylcholine (1-18:1, 2-16:1) [endoplasmic reticulum membrane]	YJR073C	0	Inf	0		22345606		YJR073C
r_2508	phosphatidyl-N,N-dimethylethanolamine methyltransferase (1-16:0, 2-18:1), ER membrane	S-adenosyl-L-methionine [endoplasmic reticulum membrane] + phosphatidyl-N,N-dimethylethanolamine (1-16:0, 2-18:1) [endoplasmic reticulum membrane] -> H+ [endoplasmic reticulum membrane] + S-adenosyl-L-homocysteine [endoplasmic reticulum membrane] + phosphatidylcholine (1-16:0, 2-18:1) [endoplasmic reticulum membrane]	YJR073C	0	Inf	0		22345606		YJR073C
r_2509	phosphatidyl-N,N-dimethylethanolamine methyltransferase (1-16:1, 2-18:1), ER membrane	S-adenosyl-L-methionine [endoplasmic reticulum membrane] + phosphatidyl-N,N-dimethylethanolamine (1-16:1, 2-18:1) [endoplasmic reticulum membrane] -> H+ [endoplasmic reticulum membrane] + S-adenosyl-L-homocysteine [endoplasmic reticulum membrane] + phosphatidylcholine (1-16:1, 2-18:1) [endoplasmic reticulum membrane]	YJR073C	0	Inf	0		22345606		YJR073C
r_2510	phosphatidyl-N,N-dimethylethanolamine methyltransferase (1-18:0, 2-18:1), ER membrane	S-adenosyl-L-methionine [endoplasmic reticulum membrane] + phosphatidyl-N,N-dimethylethanolamine (1-18:0, 2-18:1) [endoplasmic reticulum membrane] -> H+ [endoplasmic reticulum membrane] + S-adenosyl-L-homocysteine [endoplasmic reticulum membrane] + phosphatidylcholine (1-18:0, 2-18:1) [endoplasmic reticulum membrane]	YJR073C	0	Inf	0		22345606		YJR073C
r_2511	phosphatidyl-N,N-dimethylethanolamine methyltransferase (1-18:1, 2-18:1), ER membrane	S-adenosyl-L-methionine [endoplasmic reticulum membrane] + phosphatidyl-N,N-dimethylethanolamine (1-18:1, 2-18:1) [endoplasmic reticulum membrane] -> H+ [endoplasmic reticulum membrane] + S-adenosyl-L-homocysteine [endoplasmic reticulum membrane] + phosphatidylcholine (1-18:1, 2-18:1) [endoplasmic reticulum membrane]	YJR073C	0	Inf	0		22345606		YJR073C
r_2512	DAG kinase (1-16:0, 2-16:1), ER membrane	diglyceride (1-16:0, 2-16:1) [endoplasmic reticulum membrane] + CTP [endoplasmic reticulum membrane] -> H+ [endoplasmic reticulum membrane] + phosphatidate (1-16:0, 2-16:1) [endoplasmic reticulum membrane] + CDP [endoplasmic reticulum membrane]	YOR311C	0	Inf	0		22345606		YOR311C
r_2513	DAG kinase (1-16:1, 2-16:1), ER membrane	diglyceride (1-16:1, 2-16:1) [endoplasmic reticulum membrane] + CTP [endoplasmic reticulum membrane] -> H+ [endoplasmic reticulum membrane] + phosphatidate (1-16:1, 2-16:1) [endoplasmic reticulum membrane] + CDP [endoplasmic reticulum membrane]	YOR311C	0	Inf	0		22345606		YOR311C
r_2514	DAG kinase (1-18:0, 2-16:1), ER membrane	diglyceride (1-18:0, 2-16:1) [endoplasmic reticulum membrane] + CTP [endoplasmic reticulum membrane] -> H+ [endoplasmic reticulum membrane] + phosphatidate (1-18:0, 2-16:1) [endoplasmic reticulum membrane] + CDP [endoplasmic reticulum membrane]	YOR311C	0	Inf	0		22345606		YOR311C
r_2515	DAG kinase (1-18:1, 2-16:1), ER membrane	diglyceride (1-18:1, 2-16:1) [endoplasmic reticulum membrane] + CTP [endoplasmic reticulum membrane] -> H+ [endoplasmic reticulum membrane] + phosphatidate (1-18:1, 2-16:1) [endoplasmic reticulum membrane] + CDP [endoplasmic reticulum membrane]	YOR311C	0	Inf	0		22345606		YOR311C
r_2516	DAG kinase (1-16:0, 2-18:1), ER membrane	diglyceride (1-16:0, 2-18:1) [endoplasmic reticulum membrane] + CTP [endoplasmic reticulum membrane] -> H+ [endoplasmic reticulum membrane] + phosphatidate (1-16:0, 2-18:1) [endoplasmic reticulum membrane] + CDP [endoplasmic reticulum membrane]	YOR311C	0	Inf	0		22345606		YOR311C
r_2517	DAG kinase (1-16:1, 2-18:1), ER membrane	diglyceride (1-16:1, 2-18:1) [endoplasmic reticulum membrane] + CTP [endoplasmic reticulum membrane] -> H+ [endoplasmic reticulum membrane] + phosphatidate (1-16:1, 2-18:1) [endoplasmic reticulum membrane] + CDP [endoplasmic reticulum membrane]	YOR311C	0	Inf	0		22345606		YOR311C
r_2518	DAG kinase (1-18:0, 2-18:1), ER membrane	diglyceride (1-18:0, 2-18:1) [endoplasmic reticulum membrane] + CTP [endoplasmic reticulum membrane] -> H+ [endoplasmic reticulum membrane] + phosphatidate (1-18:0, 2-18:1) [endoplasmic reticulum membrane] + CDP [endoplasmic reticulum membrane]	YOR311C	0	Inf	0		22345606		YOR311C
r_2519	DAG kinase (1-18:1, 2-18:1), ER membrane	diglyceride (1-18:1, 2-18:1) [endoplasmic reticulum membrane] + CTP [endoplasmic reticulum membrane] -> H+ [endoplasmic reticulum membrane] + phosphatidate (1-18:1, 2-18:1) [endoplasmic reticulum membrane] + CDP [endoplasmic reticulum membrane]	YOR311C	0	Inf	0		22345606		YOR311C
r_2520	ethanolaminephosphotransferase (1-16:0, 2-16:1), ER membrane	diglyceride (1-16:0, 2-16:1) [endoplasmic reticulum membrane] + CDP-ethanolamine [endoplasmic reticulum membrane] -> H+ [endoplasmic reticulum membrane] + CMP [endoplasmic reticulum membrane] + phosphatidylethanolamine (1-16:0, 2-16:1) [endoplasmic reticulum membrane]	YHR123W	0	Inf	0		22345606		YHR123W
r_2521	ethanolaminephosphotransferase (1-16:1, 2-16:1), ER membrane	diglyceride (1-16:1, 2-16:1) [endoplasmic reticulum membrane] + CDP-ethanolamine [endoplasmic reticulum membrane] -> H+ [endoplasmic reticulum membrane] + CMP [endoplasmic reticulum membrane] + phosphatidylethanolamine (1-16:1, 2-16:1) [endoplasmic reticulum membrane]	YHR123W	0	Inf	0		22345606		YHR123W
r_2522	ethanolaminephosphotransferase (1-18:0, 2-16:1), ER membrane	diglyceride (1-18:0, 2-16:1) [endoplasmic reticulum membrane] + CDP-ethanolamine [endoplasmic reticulum membrane] -> H+ [endoplasmic reticulum membrane] + CMP [endoplasmic reticulum membrane] + phosphatidylethanolamine (1-18:0, 2-16:1) [endoplasmic reticulum membrane]	YHR123W	0	Inf	0		22345606		YHR123W
r_2523	ethanolaminephosphotransferase (1-18:1, 2-16:1), ER membrane	diglyceride (1-18:1, 2-16:1) [endoplasmic reticulum membrane] + CDP-ethanolamine [endoplasmic reticulum membrane] -> H+ [endoplasmic reticulum membrane] + CMP [endoplasmic reticulum membrane] + phosphatidylethanolamine (1-18:1, 2-16:1) [endoplasmic reticulum membrane]	YHR123W	0	Inf	0		22345606		YHR123W
r_2524	ethanolaminephosphotransferase (1-16:0, 2-18:1), ER membrane	diglyceride (1-16:0, 2-18:1) [endoplasmic reticulum membrane] + CDP-ethanolamine [endoplasmic reticulum membrane] -> H+ [endoplasmic reticulum membrane] + CMP [endoplasmic reticulum membrane] + phosphatidylethanolamine (1-16:0, 2-18:1) [endoplasmic reticulum membrane]	YHR123W	0	Inf	0		22345606		YHR123W
r_2525	ethanolaminephosphotransferase (1-16:1, 2-18:1), ER membrane	diglyceride (1-16:1, 2-18:1) [endoplasmic reticulum membrane] + CDP-ethanolamine [endoplasmic reticulum membrane] -> H+ [endoplasmic reticulum membrane] + CMP [endoplasmic reticulum membrane] + phosphatidylethanolamine (1-16:1, 2-18:1) [endoplasmic reticulum membrane]	YHR123W	0	Inf	0		22345606		YHR123W
r_2526	ethanolaminephosphotransferase (1-18:0, 2-18:1), ER membrane	diglyceride (1-18:0, 2-18:1) [endoplasmic reticulum membrane] + CDP-ethanolamine [endoplasmic reticulum membrane] -> H+ [endoplasmic reticulum membrane] + CMP [endoplasmic reticulum membrane] + phosphatidylethanolamine (1-18:0, 2-18:1) [endoplasmic reticulum membrane]	YHR123W	0	Inf	0		22345606		YHR123W
r_2527	ethanolaminephosphotransferase (1-18:1, 2-18:1), ER membrane	diglyceride (1-18:1, 2-18:1) [endoplasmic reticulum membrane] + CDP-ethanolamine [endoplasmic reticulum membrane] -> H+ [endoplasmic reticulum membrane] + CMP [endoplasmic reticulum membrane] + phosphatidylethanolamine (1-18:1, 2-18:1) [endoplasmic reticulum membrane]	YHR123W	0	Inf	0		22345606		YHR123W
r_2528	cholinephosphotransferase (1-16:0, 2-16:1), ER membrane	diglyceride (1-16:0, 2-16:1) [endoplasmic reticulum membrane] + CDP-choline [endoplasmic reticulum membrane] -> H+ [endoplasmic reticulum membrane] + CMP [endoplasmic reticulum membrane] + phosphatidylcholine (1-16:0, 2-16:1) [endoplasmic reticulum membrane]	( YHR123W or YNL130C )	0	Inf	0		22345606		[['YHR123W', 'YNL130C']]
r_2529	cholinephosphotransferase (1-16:1, 2-16:1), ER membrane	diglyceride (1-16:1, 2-16:1) [endoplasmic reticulum membrane] + CDP-choline [endoplasmic reticulum membrane] -> H+ [endoplasmic reticulum membrane] + CMP [endoplasmic reticulum membrane] + phosphatidylcholine (1-16:1, 2-16:1) [endoplasmic reticulum membrane]	( YHR123W or YNL130C )	0	Inf	0		22345606		[['YHR123W', 'YNL130C']]
r_2530	cholinephosphotransferase (1-18:0, 2-16:1), ER membrane	diglyceride (1-18:0, 2-16:1) [endoplasmic reticulum membrane] + CDP-choline [endoplasmic reticulum membrane] -> H+ [endoplasmic reticulum membrane] + CMP [endoplasmic reticulum membrane] + phosphatidylcholine (1-18:0, 2-16:1) [endoplasmic reticulum membrane]	( YHR123W or YNL130C )	0	Inf	0		22345606		[['YHR123W', 'YNL130C']]
r_2531	cholinephosphotransferase (1-18:1, 2-16:1), ER membrane	diglyceride (1-18:1, 2-16:1) [endoplasmic reticulum membrane] + CDP-choline [endoplasmic reticulum membrane] -> H+ [endoplasmic reticulum membrane] + CMP [endoplasmic reticulum membrane] + phosphatidylcholine (1-18:1, 2-16:1) [endoplasmic reticulum membrane]	( YHR123W or YNL130C )	0	Inf	0		22345606		[['YHR123W', 'YNL130C']]
r_2532	cholinephosphotransferase (1-16:0, 2-18:1), ER membrane	diglyceride (1-16:0, 2-18:1) [endoplasmic reticulum membrane] + CDP-choline [endoplasmic reticulum membrane] -> H+ [endoplasmic reticulum membrane] + CMP [endoplasmic reticulum membrane] + phosphatidylcholine (1-16:0, 2-18:1) [endoplasmic reticulum membrane]	( YHR123W or YNL130C )	0	Inf	0		22345606		[['YHR123W', 'YNL130C']]
r_2533	cholinephosphotransferase (1-16:1, 2-18:1), ER membrane	diglyceride (1-16:1, 2-18:1) [endoplasmic reticulum membrane] + CDP-choline [endoplasmic reticulum membrane] -> H+ [endoplasmic reticulum membrane] + CMP [endoplasmic reticulum membrane] + phosphatidylcholine (1-16:1, 2-18:1) [endoplasmic reticulum membrane]	( YHR123W or YNL130C )	0	Inf	0		22345606		[['YHR123W', 'YNL130C']]
r_2534	cholinephosphotransferase (1-18:0, 2-18:1), ER membrane	diglyceride (1-18:0, 2-18:1) [endoplasmic reticulum membrane] + CDP-choline [endoplasmic reticulum membrane] -> H+ [endoplasmic reticulum membrane] + CMP [endoplasmic reticulum membrane] + phosphatidylcholine (1-18:0, 2-18:1) [endoplasmic reticulum membrane]	( YHR123W or YNL130C )	0	Inf	0		22345606		[['YHR123W', 'YNL130C']]
r_2535	cholinephosphotransferase (1-18:1, 2-18:1), ER membrane	diglyceride (1-18:1, 2-18:1) [endoplasmic reticulum membrane] + CDP-choline [endoplasmic reticulum membrane] -> H+ [endoplasmic reticulum membrane] + CMP [endoplasmic reticulum membrane] + phosphatidylcholine (1-18:1, 2-18:1) [endoplasmic reticulum membrane]	( YHR123W or YNL130C )	0	Inf	0		22345606		[['YHR123W', 'YNL130C']]
r_2536	phosphatidylglycerolphosphate synthase (1-16:0, 2-16:1), mitochondrial membrane	CDP-diacylglycerol (1-16:0, 2-16:1) [mitochondrial membrane] + glycerol 3-phosphate [mitochondrial membrane] -> H+ [mitochondrial membrane] + CMP [mitochondrial membrane] + 3-(3-sn-phosphatidyl)-sn-glycerol 1-phosphate (1-16:0, 2-16:1) [mitochondrial membrane]	YCL004W	0	Inf	0		22345606		YCL004W
r_2537	phosphatidylglycerolphosphate synthase (1-16:1, 2-16:1), mitochondrial membrane	CDP-diacylglycerol (1-16:1, 2-16:1) [mitochondrial membrane] + glycerol 3-phosphate [mitochondrial membrane] -> H+ [mitochondrial membrane] + CMP [mitochondrial membrane] + 3-(3-sn-phosphatidyl)-sn-glycerol 1-phosphate (1-16:1, 2-16:1) [mitochondrial membrane]	YCL004W	0	Inf	0		22345606		YCL004W
r_2538	phosphatidylglycerolphosphate synthase (1-18:0, 2-16:1), mitochondrial membrane	CDP-diacylglycerol (1-18:0, 2-16:1) [mitochondrial membrane] + glycerol 3-phosphate [mitochondrial membrane] -> H+ [mitochondrial membrane] + CMP [mitochondrial membrane] + 3-(3-sn-phosphatidyl)-sn-glycerol 1-phosphate (1-18:0, 2-16:1) [mitochondrial membrane]	YCL004W	0	Inf	0		22345606		YCL004W
r_2539	phosphatidylglycerolphosphate synthase (1-18:1, 2-16:1), mitochondrial membrane	CDP-diacylglycerol (1-18:1, 2-16:1) [mitochondrial membrane] + glycerol 3-phosphate [mitochondrial membrane] -> H+ [mitochondrial membrane] + CMP [mitochondrial membrane] + 3-(3-sn-phosphatidyl)-sn-glycerol 1-phosphate (1-18:1, 2-16:1) [mitochondrial membrane]	YCL004W	0	Inf	0		22345606		YCL004W
r_2540	phosphatidylglycerolphosphate synthase (1-16:0, 2-18:1), mitochondrial membrane	CDP-diacylglycerol (1-16:0, 2-18:1) [mitochondrial membrane] + glycerol 3-phosphate [mitochondrial membrane] -> H+ [mitochondrial membrane] + CMP [mitochondrial membrane] + 3-(3-sn-phosphatidyl)-sn-glycerol 1-phosphate (1-16:0, 2-18:1) [mitochondrial membrane]	YCL004W	0	Inf	0		22345606		YCL004W
r_2541	phosphatidylglycerolphosphate synthase (1-16:1, 2-18:1), mitochondrial membrane	CDP-diacylglycerol (1-16:1, 2-18:1) [mitochondrial membrane] + glycerol 3-phosphate [mitochondrial membrane] -> H+ [mitochondrial membrane] + CMP [mitochondrial membrane] + 3-(3-sn-phosphatidyl)-sn-glycerol 1-phosphate (1-16:1, 2-18:1) [mitochondrial membrane]	YCL004W	0	Inf	0		22345606		YCL004W
r_2542	PGP phosphatase (1-16:0, 2-16:1), mitochondrial membrane	3-(3-sn-phosphatidyl)-sn-glycerol 1-phosphate (1-16:0, 2-16:1) [mitochondrial membrane] + H2O [mitochondrial membrane] -> phosphatidylglycerol (1-16:0, 2-16:1) [mitochondrial membrane] + phosphate [mitochondrial membrane]	YHR100C	0	Inf	0		22345606		YHR100C
r_2543	PGP phosphatase (1-16:1, 2-16:1), mitochondrial membrane	3-(3-sn-phosphatidyl)-sn-glycerol 1-phosphate (1-16:1, 2-16:1) [mitochondrial membrane] + H2O [mitochondrial membrane] -> phosphate [mitochondrial membrane] + phosphatidylglycerol (1-16:1, 2-16:1) [mitochondrial membrane]	YHR100C	0	Inf	0		22345606		YHR100C
r_2544	PGP phosphatase (1-18:0, 2-16:1), mitochondrial membrane	3-(3-sn-phosphatidyl)-sn-glycerol 1-phosphate (1-18:0, 2-16:1) [mitochondrial membrane] + H2O [mitochondrial membrane] -> phosphate [mitochondrial membrane] + phosphatidylglycerol (1-18:0, 2-16:1) [mitochondrial membrane]	YHR100C	0	Inf	0		22345606		YHR100C
r_2545	PGP phosphatase (1-18:1, 2-16:1), mitochondrial membrane	3-(3-sn-phosphatidyl)-sn-glycerol 1-phosphate (1-18:1, 2-16:1) [mitochondrial membrane] + H2O [mitochondrial membrane] -> phosphate [mitochondrial membrane] + phosphatidylglycerol (1-18:1, 2-16:1) [mitochondrial membrane]	YHR100C	0	Inf	0		22345606		YHR100C
r_2546	PGP phosphatase (1-16:0, 2-18:1), mitochondrial membrane	3-(3-sn-phosphatidyl)-sn-glycerol 1-phosphate (1-16:0, 2-18:1) [mitochondrial membrane] + H2O [mitochondrial membrane] -> phosphate [mitochondrial membrane] + phosphatidylglycerol (1-16:0, 2-18:1) [mitochondrial membrane]	YHR100C	0	Inf	0		22345606		YHR100C
r_2547	PGP phosphatase (1-16:1, 2-18:1), mitochondrial membrane	3-(3-sn-phosphatidyl)-sn-glycerol 1-phosphate (1-16:1, 2-18:1) [mitochondrial membrane] + H2O [mitochondrial membrane] -> phosphate [mitochondrial membrane] + phosphatidylglycerol (1-16:1, 2-18:1) [mitochondrial membrane]	YHR100C	0	Inf	0		22345606		YHR100C
r_2548	CL synthase (1-16:0, 2-16:1, 3-16:0, 4-16:1), mitochondrial membrane	CDP-diacylglycerol (1-16:0, 2-16:1) [mitochondrial membrane] + phosphatidylglycerol (1-16:0, 2-16:1) [mitochondrial membrane] -> H+ [mitochondrial membrane] + CMP [mitochondrial membrane] + cardiolipin (1-16:0, 2-16:1, 3-16:0, 4-16:1) [mitochondrial membrane]	YDL142C	0	Inf	0		22345606		YDL142C
r_2549	CL synthase (1-16:0, 2-16:1, 3-16:1, 4-16:1), mitochondrial membrane	CDP-diacylglycerol (1-16:0, 2-16:1) [mitochondrial membrane] + phosphatidylglycerol (1-16:1, 2-16:1) [mitochondrial membrane] -> H+ [mitochondrial membrane] + CMP [mitochondrial membrane] + cardiolipin (1-16:0, 2-16:1, 3-16:1, 4-16:1) [mitochondrial membrane]	YDL142C	0	Inf	0		22345606		YDL142C
r_2550	CL synthase (1-16:0, 2-16:1, 3-18:0, 4-16:1), mitochondrial membrane	CDP-diacylglycerol (1-16:0, 2-16:1) [mitochondrial membrane] + phosphatidylglycerol (1-18:0, 2-16:1) [mitochondrial membrane] -> H+ [mitochondrial membrane] + CMP [mitochondrial membrane] + cardiolipin (1-16:0, 2-16:1, 3-18:0, 4-16:1) [mitochondrial membrane]	YDL142C	0	Inf	0		22345606		YDL142C
r_2551	CL synthase (1-16:0, 2-16:1, 3-18:1, 4-16:1), mitochondrial membrane	CDP-diacylglycerol (1-16:0, 2-16:1) [mitochondrial membrane] + phosphatidylglycerol (1-18:1, 2-16:1) [mitochondrial membrane] -> H+ [mitochondrial membrane] + CMP [mitochondrial membrane] + cardiolipin (1-16:0, 2-16:1, 3-18:1, 4-16:1) [mitochondrial membrane]	YDL142C	0	Inf	0		22345606		YDL142C
r_2552	CL synthase (1-16:0, 2-16:1, 3-16:0, 4-18:1), mitochondrial membrane	CDP-diacylglycerol (1-16:0, 2-16:1) [mitochondrial membrane] + phosphatidylglycerol (1-16:0, 2-18:1) [mitochondrial membrane] -> H+ [mitochondrial membrane] + CMP [mitochondrial membrane] + cardiolipin (1-16:0, 2-16:1, 3-16:0, 4-18:1) [mitochondrial membrane]	YDL142C	0	Inf	0		22345606		YDL142C
r_2553	CL synthase (1-16:0, 2-16:1, 3-16:1, 4-18:1), mitochondrial membrane	CDP-diacylglycerol (1-16:0, 2-16:1) [mitochondrial membrane] + phosphatidylglycerol (1-16:1, 2-18:1) [mitochondrial membrane] -> H+ [mitochondrial membrane] + CMP [mitochondrial membrane] + cardiolipin (1-16:0, 2-16:1, 3-16:1, 4-18:1) [mitochondrial membrane]	YDL142C	0	Inf	0		22345606		YDL142C
r_2554	CL synthase (1-16:1, 2-16:1, 3-16:0, 4-16:1), mitochondrial membrane	CDP-diacylglycerol (1-16:1, 2-16:1) [mitochondrial membrane] + phosphatidylglycerol (1-16:0, 2-16:1) [mitochondrial membrane] -> H+ [mitochondrial membrane] + CMP [mitochondrial membrane] + cardiolipin (1-16:1, 2-16:1, 3-16:0, 4-16:1) [mitochondrial membrane]	YDL142C	0	Inf	0		22345606		YDL142C
r_2555	CL synthase (1-16:1, 2-16:1, 3-16:1, 4-16:1), mitochondrial membrane	CDP-diacylglycerol (1-16:1, 2-16:1) [mitochondrial membrane] + phosphatidylglycerol (1-16:1, 2-16:1) [mitochondrial membrane] -> H+ [mitochondrial membrane] + CMP [mitochondrial membrane] + cardiolipin (1-16:1, 2-16:1, 3-16:1, 4-16:1) [mitochondrial membrane]	YDL142C	0	Inf	0		22345606		YDL142C
r_2556	CL synthase (1-16:1, 2-16:1, 3-18:0, 4-16:1), mitochondrial membrane	CDP-diacylglycerol (1-16:1, 2-16:1) [mitochondrial membrane] + phosphatidylglycerol (1-18:0, 2-16:1) [mitochondrial membrane] -> H+ [mitochondrial membrane] + CMP [mitochondrial membrane] + cardiolipin (1-16:1, 2-16:1, 3-18:0, 4-16:1) [mitochondrial membrane]	YDL142C	0	Inf	0		22345606		YDL142C
r_2557	CL synthase (1-16:1, 2-16:1, 3-18:1, 4-16:1), mitochondrial membrane	CDP-diacylglycerol (1-16:1, 2-16:1) [mitochondrial membrane] + phosphatidylglycerol (1-18:1, 2-16:1) [mitochondrial membrane] -> H+ [mitochondrial membrane] + CMP [mitochondrial membrane] + cardiolipin (1-16:1, 2-16:1, 3-18:1, 4-16:1) [mitochondrial membrane]	YDL142C	0	Inf	0		22345606		YDL142C
r_2558	CL synthase (1-16:1, 2-16:1, 3-16:0, 4-18:1), mitochondrial membrane	CDP-diacylglycerol (1-16:1, 2-16:1) [mitochondrial membrane] + phosphatidylglycerol (1-16:0, 2-18:1) [mitochondrial membrane] -> H+ [mitochondrial membrane] + CMP [mitochondrial membrane] + cardiolipin (1-16:1, 2-16:1, 3-16:0, 4-18:1) [mitochondrial membrane]	YDL142C	0	Inf	0		22345606		YDL142C
r_2559	CL synthase (1-16:1, 2-16:1, 3-16:1, 4-18:1), mitochondrial membrane	CDP-diacylglycerol (1-16:1, 2-16:1) [mitochondrial membrane] + phosphatidylglycerol (1-16:1, 2-18:1) [mitochondrial membrane] -> H+ [mitochondrial membrane] + CMP [mitochondrial membrane] + cardiolipin (1-16:1, 2-16:1, 3-16:1, 4-18:1) [mitochondrial membrane]	YDL142C	0	Inf	0		22345606		YDL142C
r_2560	CL synthase (1-18:0, 2-16:1, 3-16:0, 4-16:1), mitochondrial membrane	CDP-diacylglycerol (1-18:0, 2-16:1) [mitochondrial membrane] + phosphatidylglycerol (1-16:0, 2-16:1) [mitochondrial membrane] -> H+ [mitochondrial membrane] + CMP [mitochondrial membrane] + cardiolipin (1-18:0, 2-16:1, 3-16:0, 4-16:1) [mitochondrial membrane]	YDL142C	0	Inf	0		22345606		YDL142C
r_2561	CL synthase (1-18:0, 2-16:1, 3-16:1, 4-16:1), mitochondrial membrane	CDP-diacylglycerol (1-18:0, 2-16:1) [mitochondrial membrane] + phosphatidylglycerol (1-16:1, 2-16:1) [mitochondrial membrane] -> H+ [mitochondrial membrane] + CMP [mitochondrial membrane] + cardiolipin (1-18:0, 2-16:1, 3-16:1, 4-16:1) [mitochondrial membrane]	YDL142C	0	Inf	0		22345606		YDL142C
r_2562	CL synthase (1-18:0, 2-16:1, 3-18:0, 4-16:1), mitochondrial membrane	CDP-diacylglycerol (1-18:0, 2-16:1) [mitochondrial membrane] + phosphatidylglycerol (1-18:0, 2-16:1) [mitochondrial membrane] -> H+ [mitochondrial membrane] + CMP [mitochondrial membrane] + cardiolipin (1-18:0, 2-16:1, 3-18:0, 4-16:1) [mitochondrial membrane]	YDL142C	0	Inf	0		22345606		YDL142C
r_2563	CL synthase (1-18:0, 2-16:1, 3-18:1, 4-16:1), mitochondrial membrane	CDP-diacylglycerol (1-18:0, 2-16:1) [mitochondrial membrane] + phosphatidylglycerol (1-18:1, 2-16:1) [mitochondrial membrane] -> H+ [mitochondrial membrane] + CMP [mitochondrial membrane] + cardiolipin (1-18:0, 2-16:1, 3-18:1, 4-16:1) [mitochondrial membrane]	YDL142C	0	Inf	0		22345606		YDL142C
r_2564	CL synthase (1-18:0, 2-16:1, 3-16:0, 4-18:1), mitochondrial membrane	CDP-diacylglycerol (1-18:0, 2-16:1) [mitochondrial membrane] + phosphatidylglycerol (1-16:0, 2-18:1) [mitochondrial membrane] -> H+ [mitochondrial membrane] + CMP [mitochondrial membrane] + cardiolipin (1-18:0, 2-16:1, 3-16:0, 4-18:1) [mitochondrial membrane]	YDL142C	0	Inf	0		22345606		YDL142C
r_2565	CL synthase (1-18:0, 2-16:1, 3-16:1, 4-18:1), mitochondrial membrane	CDP-diacylglycerol (1-18:0, 2-16:1) [mitochondrial membrane] + phosphatidylglycerol (1-16:1, 2-18:1) [mitochondrial membrane] -> H+ [mitochondrial membrane] + CMP [mitochondrial membrane] + cardiolipin (1-18:0, 2-16:1, 3-16:1, 4-18:1) [mitochondrial membrane]	YDL142C	0	Inf	0		22345606		YDL142C
r_2566	CL synthase (1-18:1, 2-16:1, 3-16:0, 4-16:1), mitochondrial membrane	CDP-diacylglycerol (1-18:1, 2-16:1) [mitochondrial membrane] + phosphatidylglycerol (1-16:0, 2-16:1) [mitochondrial membrane] -> H+ [mitochondrial membrane] + CMP [mitochondrial membrane] + cardiolipin (1-18:1, 2-16:1, 3-16:0, 4-16:1) [mitochondrial membrane]	YDL142C	0	Inf	0		22345606		YDL142C
r_2567	CL synthase (1-18:1, 2-16:1, 3-16:1, 4-16:1), mitochondrial membrane	CDP-diacylglycerol (1-18:1, 2-16:1) [mitochondrial membrane] + phosphatidylglycerol (1-16:1, 2-16:1) [mitochondrial membrane] -> H+ [mitochondrial membrane] + CMP [mitochondrial membrane] + cardiolipin (1-18:1, 2-16:1, 3-16:1, 4-16:1) [mitochondrial membrane]	YDL142C	0	Inf	0		22345606		YDL142C
r_2568	CL synthase (1-18:1, 2-16:1, 3-18:0, 4-16:1), mitochondrial membrane	CDP-diacylglycerol (1-18:1, 2-16:1) [mitochondrial membrane] + phosphatidylglycerol (1-18:0, 2-16:1) [mitochondrial membrane] -> H+ [mitochondrial membrane] + CMP [mitochondrial membrane] + cardiolipin (1-18:1, 2-16:1, 3-18:0, 4-16:1) [mitochondrial membrane]	YDL142C	0	Inf	0		22345606		YDL142C
r_2569	CL synthase (1-18:1, 2-16:1, 3-18:1, 4-16:1), mitochondrial membrane	CDP-diacylglycerol (1-18:1, 2-16:1) [mitochondrial membrane] + phosphatidylglycerol (1-18:1, 2-16:1) [mitochondrial membrane] -> H+ [mitochondrial membrane] + CMP [mitochondrial membrane] + cardiolipin (1-18:1, 2-16:1, 3-18:1, 4-16:1) [mitochondrial membrane]	YDL142C	0	Inf	0		22345606		YDL142C
r_2570	CL synthase (1-18:1, 2-16:1, 3-16:0, 4-18:1), mitochondrial membrane	CDP-diacylglycerol (1-18:1, 2-16:1) [mitochondrial membrane] + phosphatidylglycerol (1-16:0, 2-18:1) [mitochondrial membrane] -> H+ [mitochondrial membrane] + CMP [mitochondrial membrane] + cardiolipin (1-18:1, 2-16:1, 3-16:0, 4-18:1) [mitochondrial membrane]	YDL142C	0	Inf	0		22345606		YDL142C
r_2571	CL synthase (1-18:1, 2-16:1, 3-16:1, 4-18:1), mitochondrial membrane	CDP-diacylglycerol (1-18:1, 2-16:1) [mitochondrial membrane] + phosphatidylglycerol (1-16:1, 2-18:1) [mitochondrial membrane] -> H+ [mitochondrial membrane] + CMP [mitochondrial membrane] + cardiolipin (1-18:1, 2-16:1, 3-16:1, 4-18:1) [mitochondrial membrane]	YDL142C	0	Inf	0		22345606		YDL142C
r_2572	CL synthase (1-16:0, 2-18:1, 3-16:0, 4-16:1), mitochondrial membrane	CDP-diacylglycerol (1-16:0, 2-18:1) [mitochondrial membrane] + phosphatidylglycerol (1-16:0, 2-16:1) [mitochondrial membrane] -> H+ [mitochondrial membrane] + CMP [mitochondrial membrane] + cardiolipin (1-16:0, 2-18:1, 3-16:0, 4-16:1) [mitochondrial membrane]	YDL142C	0	Inf	0		22345606		YDL142C
r_2573	CL synthase (1-16:0, 2-18:1, 3-16:1, 4-16:1), mitochondrial membrane	CDP-diacylglycerol (1-16:0, 2-18:1) [mitochondrial membrane] + phosphatidylglycerol (1-16:1, 2-16:1) [mitochondrial membrane] -> H+ [mitochondrial membrane] + CMP [mitochondrial membrane] + cardiolipin (1-16:0, 2-18:1, 3-16:1, 4-16:1) [mitochondrial membrane]	YDL142C	0	Inf	0		22345606		YDL142C
r_2574	CL synthase (1-16:0, 2-18:1, 3-18:0, 4-16:1), mitochondrial membrane	CDP-diacylglycerol (1-16:0, 2-18:1) [mitochondrial membrane] + phosphatidylglycerol (1-18:0, 2-16:1) [mitochondrial membrane] -> H+ [mitochondrial membrane] + CMP [mitochondrial membrane] + cardiolipin (1-16:0, 2-18:1, 3-18:0, 4-16:1) [mitochondrial membrane]	YDL142C	0	Inf	0		22345606		YDL142C
r_2575	CL synthase (1-16:0, 2-18:1, 3-18:1, 4-16:1), mitochondrial membrane	CDP-diacylglycerol (1-16:0, 2-18:1) [mitochondrial membrane] + phosphatidylglycerol (1-18:1, 2-16:1) [mitochondrial membrane] -> H+ [mitochondrial membrane] + CMP [mitochondrial membrane] + cardiolipin (1-16:0, 2-18:1, 3-18:1, 4-16:1) [mitochondrial membrane]	YDL142C	0	Inf	0		22345606		YDL142C
r_2576	CL synthase (1-16:0, 2-18:1, 3-16:0, 4-18:1), mitochondrial membrane	CDP-diacylglycerol (1-16:0, 2-18:1) [mitochondrial membrane] + phosphatidylglycerol (1-16:0, 2-18:1) [mitochondrial membrane] -> H+ [mitochondrial membrane] + CMP [mitochondrial membrane] + cardiolipin (1-16:0, 2-18:1, 3-16:0, 4-18:1) [mitochondrial membrane]	YDL142C	0	Inf	0		22345606		YDL142C
r_2577	CL synthase (1-16:0, 2-18:1, 3-16:1, 4-18:1), mitochondrial membrane	CDP-diacylglycerol (1-16:0, 2-18:1) [mitochondrial membrane] + phosphatidylglycerol (1-16:1, 2-18:1) [mitochondrial membrane] -> H+ [mitochondrial membrane] + CMP [mitochondrial membrane] + cardiolipin (1-16:0, 2-18:1, 3-16:1, 4-18:1) [mitochondrial membrane]	YDL142C	0	Inf	0		22345606		YDL142C
r_2578	CL synthase (1-16:1, 2-18:1, 3-16:0, 4-16:1), mitochondrial membrane	CDP-diacylglycerol (1-16:1, 2-18:1) [mitochondrial membrane] + phosphatidylglycerol (1-16:0, 2-16:1) [mitochondrial membrane] -> H+ [mitochondrial membrane] + CMP [mitochondrial membrane] + cardiolipin (1-16:1, 2-18:1, 3-16:0, 4-16:1) [mitochondrial membrane]	YDL142C	0	Inf	0		22345606		YDL142C
r_2579	CL synthase (1-16:1, 2-18:1, 3-16:1, 4-16:1), mitochondrial membrane	CDP-diacylglycerol (1-16:1, 2-18:1) [mitochondrial membrane] + phosphatidylglycerol (1-16:1, 2-16:1) [mitochondrial membrane] -> H+ [mitochondrial membrane] + CMP [mitochondrial membrane] + cardiolipin (1-16:1, 2-18:1, 3-16:1, 4-16:1) [mitochondrial membrane]	YDL142C	0	Inf	0		22345606		YDL142C
r_2580	CL synthase (1-16:1, 2-18:1, 3-18:0, 4-16:1), mitochondrial membrane	CDP-diacylglycerol (1-16:1, 2-18:1) [mitochondrial membrane] + phosphatidylglycerol (1-18:0, 2-16:1) [mitochondrial membrane] -> H+ [mitochondrial membrane] + CMP [mitochondrial membrane] + cardiolipin (1-16:1, 2-18:1, 3-18:0, 4-16:1) [mitochondrial membrane]	YDL142C	0	Inf	0		22345606		YDL142C
r_2581	CL synthase (1-16:1, 2-18:1, 3-18:1, 4-16:1), mitochondrial membrane	CDP-diacylglycerol (1-16:1, 2-18:1) [mitochondrial membrane] + phosphatidylglycerol (1-18:1, 2-16:1) [mitochondrial membrane] -> H+ [mitochondrial membrane] + CMP [mitochondrial membrane] + cardiolipin (1-16:1, 2-18:1, 3-18:1, 4-16:1) [mitochondrial membrane]	YDL142C	0	Inf	0		22345606		YDL142C
r_2582	CL synthase (1-16:1, 2-18:1, 3-16:0, 4-18:1), mitochondrial membrane	CDP-diacylglycerol (1-16:1, 2-18:1) [mitochondrial membrane] + phosphatidylglycerol (1-16:0, 2-18:1) [mitochondrial membrane] -> H+ [mitochondrial membrane] + CMP [mitochondrial membrane] + cardiolipin (1-16:1, 2-18:1, 3-16:0, 4-18:1) [mitochondrial membrane]	YDL142C	0	Inf	0		22345606		YDL142C
r_2583	CL synthase (1-16:1, 2-18:1, 3-16:1, 4-18:1), mitochondrial membrane	CDP-diacylglycerol (1-16:1, 2-18:1) [mitochondrial membrane] + phosphatidylglycerol (1-16:1, 2-18:1) [mitochondrial membrane] -> H+ [mitochondrial membrane] + CMP [mitochondrial membrane] + cardiolipin (1-16:1, 2-18:1, 3-16:1, 4-18:1) [mitochondrial membrane]	YDL142C	0	Inf	0		22345606		YDL142C
r_2584	CL (1-16:0, 2-16:1, 3-16:0, 4-16:1) phospholipase (1-position), mitochondrial membrane	H2O [mitochondrial membrane] + cardiolipin (1-16:0, 2-16:1, 3-16:0, 4-16:1) [mitochondrial membrane] -> H+ [mitochondrial membrane] + monolysocardiolipin (2-16:1, 3-16:0, 4-16:1) [mitochondrial membrane] + palmitate [mitochondrial membrane]	YGR110W	0	Inf	0		22345606		YGR110W
r_2585	CL (1-16:0, 2-16:1, 3-16:1, 4-16:1) phospholipase (1-position), mitochondrial membrane	H2O [mitochondrial membrane] + cardiolipin (1-16:0, 2-16:1, 3-16:1, 4-16:1) [mitochondrial membrane] -> H+ [mitochondrial membrane] + palmitate [mitochondrial membrane] + monolysocardiolipin (2-16:1, 3-16:1, 4-16:1) [mitochondrial membrane]	YGR110W	0	Inf	0		22345606		YGR110W
r_2586	CL (1-16:0, 2-16:1, 3-18:0, 4-16:1) phospholipase (1-position), mitochondrial membrane	H2O [mitochondrial membrane] + cardiolipin (1-16:0, 2-16:1, 3-18:0, 4-16:1) [mitochondrial membrane] -> H+ [mitochondrial membrane] + palmitate [mitochondrial membrane] + monolysocardiolipin (2-16:1, 3-18:0, 4-16:1) [mitochondrial membrane]	YGR110W	0	Inf	0		22345606		YGR110W
r_2587	CL (1-16:0, 2-16:1, 3-18:1, 4-16:1) phospholipase (1-position), mitochondrial membrane	H2O [mitochondrial membrane] + cardiolipin (1-16:0, 2-16:1, 3-18:1, 4-16:1) [mitochondrial membrane] -> H+ [mitochondrial membrane] + palmitate [mitochondrial membrane] + monolysocardiolipin (2-16:1, 3-18:1, 4-16:1) [mitochondrial membrane]	YGR110W	0	Inf	0		22345606		YGR110W
r_2588	CL (1-16:0, 2-16:1, 3-16:0, 4-18:1) phospholipase (1-position), mitochondrial membrane	H2O [mitochondrial membrane] + cardiolipin (1-16:0, 2-16:1, 3-16:0, 4-18:1) [mitochondrial membrane] -> H+ [mitochondrial membrane] + palmitate [mitochondrial membrane] + monolysocardiolipin (2-16:1, 3-16:0, 4-18:1) [mitochondrial membrane]	YGR110W	0	Inf	0		22345606		YGR110W
r_2589	CL (1-16:0, 2-16:1, 3-16:1, 4-18:1) phospholipase (1-position), mitochondrial membrane	H2O [mitochondrial membrane] + cardiolipin (1-16:0, 2-16:1, 3-16:1, 4-18:1) [mitochondrial membrane] -> H+ [mitochondrial membrane] + palmitate [mitochondrial membrane] + monolysocardiolipin (2-16:1, 3-16:1, 4-18:1) [mitochondrial membrane]	YGR110W	0	Inf	0		22345606		YGR110W
r_2590	CL (1-18:0, 2-16:1, 3-16:0, 4-16:1) phospholipase (1-position), mitochondrial membrane	H2O [mitochondrial membrane] + cardiolipin (1-18:0, 2-16:1, 3-16:0, 4-16:1) [mitochondrial membrane] -> H+ [mitochondrial membrane] + monolysocardiolipin (2-16:1, 3-16:0, 4-16:1) [mitochondrial membrane] + stearate [mitochondrial membrane]	YGR110W	0	Inf	0		22345606		YGR110W
r_2591	CL (1-18:0, 2-16:1, 3-16:1, 4-16:1) phospholipase (1-position), mitochondrial membrane	H2O [mitochondrial membrane] + cardiolipin (1-18:0, 2-16:1, 3-16:1, 4-16:1) [mitochondrial membrane] -> H+ [mitochondrial membrane] + monolysocardiolipin (2-16:1, 3-16:1, 4-16:1) [mitochondrial membrane] + stearate [mitochondrial membrane]	YGR110W	0	Inf	0		22345606		YGR110W
r_2592	CL (1-18:0, 2-16:1, 3-18:0, 4-16:1) phospholipase (1-position), mitochondrial membrane	H2O [mitochondrial membrane] + cardiolipin (1-18:0, 2-16:1, 3-18:0, 4-16:1) [mitochondrial membrane] -> H+ [mitochondrial membrane] + monolysocardiolipin (2-16:1, 3-18:0, 4-16:1) [mitochondrial membrane] + stearate [mitochondrial membrane]	YGR110W	0	Inf	0		22345606		YGR110W
r_2593	CL (1-18:0, 2-16:1, 3-18:1, 4-16:1) phospholipase (1-position), mitochondrial membrane	H2O [mitochondrial membrane] + cardiolipin (1-18:0, 2-16:1, 3-18:1, 4-16:1) [mitochondrial membrane] -> H+ [mitochondrial membrane] + monolysocardiolipin (2-16:1, 3-18:1, 4-16:1) [mitochondrial membrane] + stearate [mitochondrial membrane]	YGR110W	0	Inf	0		22345606		YGR110W
r_2594	CL (1-18:0, 2-16:1, 3-16:0, 4-18:1) phospholipase (1-position), mitochondrial membrane	H2O [mitochondrial membrane] + cardiolipin (1-18:0, 2-16:1, 3-16:0, 4-18:1) [mitochondrial membrane] -> H+ [mitochondrial membrane] + monolysocardiolipin (2-16:1, 3-16:0, 4-18:1) [mitochondrial membrane] + stearate [mitochondrial membrane]	YGR110W	0	Inf	0		22345606		YGR110W
r_2595	CL (1-18:0, 2-16:1, 3-16:1, 4-18:1) phospholipase (1-position), mitochondrial membrane	H2O [mitochondrial membrane] + cardiolipin (1-18:0, 2-16:1, 3-16:1, 4-18:1) [mitochondrial membrane] -> H+ [mitochondrial membrane] + monolysocardiolipin (2-16:1, 3-16:1, 4-18:1) [mitochondrial membrane] + stearate [mitochondrial membrane]	YGR110W	0	Inf	0		22345606		YGR110W
r_2596	CL (1-16:0, 2-18:1, 3-16:0, 4-16:1) phospholipase (1-position), mitochondrial membrane	H2O [mitochondrial membrane] + cardiolipin (1-16:0, 2-18:1, 3-16:0, 4-16:1) [mitochondrial membrane] -> H+ [mitochondrial membrane] + palmitate [mitochondrial membrane] + monolysocardiolipin (2-18:1, 3-16:0, 4-16:1) [mitochondrial membrane]	YGR110W	0	Inf	0		22345606		YGR110W
r_2597	CL (1-16:0, 2-18:1, 3-16:1, 4-16:1) phospholipase (1-position), mitochondrial membrane	H2O [mitochondrial membrane] + cardiolipin (1-16:0, 2-18:1, 3-16:1, 4-16:1) [mitochondrial membrane] -> H+ [mitochondrial membrane] + palmitate [mitochondrial membrane] + monolysocardiolipin (2-18:1, 3-16:1, 4-16:1) [mitochondrial membrane]	YGR110W	0	Inf	0		22345606		YGR110W
r_2598	CL (1-16:0, 2-18:1, 3-18:0, 4-16:1) phospholipase (1-position), mitochondrial membrane	H2O [mitochondrial membrane] + cardiolipin (1-16:0, 2-18:1, 3-18:0, 4-16:1) [mitochondrial membrane] -> H+ [mitochondrial membrane] + palmitate [mitochondrial membrane] + monolysocardiolipin (2-18:1, 3-18:0, 4-16:1) [mitochondrial membrane]	YGR110W	0	Inf	0		22345606		YGR110W
r_2599	CL (1-16:0, 2-18:1, 3-18:1, 4-16:1) phospholipase (1-position), mitochondrial membrane	H2O [mitochondrial membrane] + cardiolipin (1-16:0, 2-18:1, 3-18:1, 4-16:1) [mitochondrial membrane] -> H+ [mitochondrial membrane] + palmitate [mitochondrial membrane] + monolysocardiolipin (2-18:1, 3-18:1, 4-16:1) [mitochondrial membrane]	YGR110W	0	Inf	0		22345606		YGR110W
r_2600	CL (1-16:0, 2-18:1, 3-16:0, 4-18:1) phospholipase (1-position), mitochondrial membrane	H2O [mitochondrial membrane] + cardiolipin (1-16:0, 2-18:1, 3-16:0, 4-18:1) [mitochondrial membrane] -> H+ [mitochondrial membrane] + palmitate [mitochondrial membrane] + monolysocardiolipin (2-18:1, 3-16:0, 4-18:1) [mitochondrial membrane]	YGR110W	0	Inf	0		22345606		YGR110W
r_2601	CL (1-16:0, 2-18:1, 3-16:1, 4-18:1) phospholipase (1-position), mitochondrial membrane	H2O [mitochondrial membrane] + cardiolipin (1-16:0, 2-18:1, 3-16:1, 4-18:1) [mitochondrial membrane] -> H+ [mitochondrial membrane] + palmitate [mitochondrial membrane] + monolysocardiolipin (2-18:1, 3-16:1, 4-18:1) [mitochondrial membrane]	YGR110W	0	Inf	0		22345606		YGR110W
r_2602	CL (1-16:0, 2-16:1, 3-16:0, 4-16:1) phospholipase (3-position), mitochondrial membrane	H2O [mitochondrial membrane] + cardiolipin (1-16:0, 2-16:1, 3-16:0, 4-16:1) [mitochondrial membrane] -> H+ [mitochondrial membrane] + palmitate [mitochondrial membrane] + monolysocardiolipin (1-16:0, 2-16:1, 4-16:1) [mitochondrial membrane]	YGR110W	0	Inf	0		22345606		YGR110W
r_2603	CL (1-16:0, 2-16:1, 3-18:0, 4-16:1) phospholipase (3-position), mitochondrial membrane	H2O [mitochondrial membrane] + cardiolipin (1-16:0, 2-16:1, 3-18:0, 4-16:1) [mitochondrial membrane] -> H+ [mitochondrial membrane] + stearate [mitochondrial membrane] + monolysocardiolipin (1-16:0, 2-16:1, 4-16:1) [mitochondrial membrane]	YGR110W	0	Inf	0		22345606		YGR110W
r_2604	CL (1-16:0, 2-16:1, 3-16:0, 4-18:1) phospholipase (3-position), mitochondrial membrane	H2O [mitochondrial membrane] + cardiolipin (1-16:0, 2-16:1, 3-16:0, 4-18:1) [mitochondrial membrane] -> H+ [mitochondrial membrane] + palmitate [mitochondrial membrane] + monolysocardiolipin (1-16:0, 2-16:1, 4-18:1) [mitochondrial membrane]	YGR110W	0	Inf	0		22345606		YGR110W
r_2605	CL (1-16:1, 2-16:1, 3-16:0, 4-16:1) phospholipase (3-position), mitochondrial membrane	H2O [mitochondrial membrane] + cardiolipin (1-16:1, 2-16:1, 3-16:0, 4-16:1) [mitochondrial membrane] -> H+ [mitochondrial membrane] + palmitate [mitochondrial membrane] + monolysocardiolipin (1-16:1, 2-16:1, 4-16:1) [mitochondrial membrane]	YGR110W	0	Inf	0		22345606		YGR110W
r_2606	CL (1-16:1, 2-16:1, 3-18:0, 4-16:1) phospholipase (3-position), mitochondrial membrane	H2O [mitochondrial membrane] + cardiolipin (1-16:1, 2-16:1, 3-18:0, 4-16:1) [mitochondrial membrane] -> H+ [mitochondrial membrane] + stearate [mitochondrial membrane] + monolysocardiolipin (1-16:1, 2-16:1, 4-16:1) [mitochondrial membrane]	YGR110W	0	Inf	0		22345606		YGR110W
r_2607	CL (1-16:1, 2-16:1, 3-16:0, 4-18:1) phospholipase (3-position), mitochondrial membrane	H2O [mitochondrial membrane] + cardiolipin (1-16:1, 2-16:1, 3-16:0, 4-18:1) [mitochondrial membrane] -> H+ [mitochondrial membrane] + palmitate [mitochondrial membrane] + monolysocardiolipin (1-16:1, 2-16:1, 4-18:1) [mitochondrial membrane]	YGR110W	0	Inf	0		22345606		YGR110W
r_2608	CL (1-18:0, 2-16:1, 3-16:0, 4-16:1) phospholipase (3-position), mitochondrial membrane	H2O [mitochondrial membrane] + cardiolipin (1-18:0, 2-16:1, 3-16:0, 4-16:1) [mitochondrial membrane] -> H+ [mitochondrial membrane] + palmitate [mitochondrial membrane] + monolysocardiolipin (1-18:0, 2-16:1, 4-16:1) [mitochondrial membrane]	YGR110W	0	Inf	0		22345606		YGR110W
r_2609	CL (1-18:0, 2-16:1, 3-18:0, 4-16:1) phospholipase (3-position), mitochondrial membrane	H2O [mitochondrial membrane] + cardiolipin (1-18:0, 2-16:1, 3-18:0, 4-16:1) [mitochondrial membrane] -> H+ [mitochondrial membrane] + stearate [mitochondrial membrane] + monolysocardiolipin (1-18:0, 2-16:1, 4-16:1) [mitochondrial membrane]	YGR110W	0	Inf	0		22345606		YGR110W
r_2610	CL (1-18:0, 2-16:1, 3-16:0, 4-18:1) phospholipase (3-position), mitochondrial membrane	H2O [mitochondrial membrane] + cardiolipin (1-18:0, 2-16:1, 3-16:0, 4-18:1) [mitochondrial membrane] -> H+ [mitochondrial membrane] + palmitate [mitochondrial membrane] + monolysocardiolipin (1-18:0, 2-16:1, 4-18:1) [mitochondrial membrane]	YGR110W	0	Inf	0		22345606		YGR110W
r_2611	CL (1-18:1, 2-16:1, 3-16:0, 4-16:1) phospholipase (3-position), mitochondrial membrane	H2O [mitochondrial membrane] + cardiolipin (1-18:1, 2-16:1, 3-16:0, 4-16:1) [mitochondrial membrane] -> H+ [mitochondrial membrane] + palmitate [mitochondrial membrane] + monolysocardiolipin (1-18:1, 2-16:1, 4-16:1) [mitochondrial membrane]	YGR110W	0	Inf	0		22345606		YGR110W
r_2612	CL (1-18:1, 2-16:1, 3-18:0, 4-16:1) phospholipase (3-position), mitochondrial membrane	H2O [mitochondrial membrane] + cardiolipin (1-18:1, 2-16:1, 3-18:0, 4-16:1) [mitochondrial membrane] -> H+ [mitochondrial membrane] + stearate [mitochondrial membrane] + monolysocardiolipin (1-18:1, 2-16:1, 4-16:1) [mitochondrial membrane]	YGR110W	0	Inf	0		22345606		YGR110W
r_2613	CL (1-18:1, 2-16:1, 3-16:0, 4-18:1) phospholipase (3-position), mitochondrial membrane	H2O [mitochondrial membrane] + cardiolipin (1-18:1, 2-16:1, 3-16:0, 4-18:1) [mitochondrial membrane] -> H+ [mitochondrial membrane] + palmitate [mitochondrial membrane] + monolysocardiolipin (1-18:1, 2-16:1, 4-18:1) [mitochondrial membrane]	YGR110W	0	Inf	0		22345606		YGR110W
r_2614	CL (1-16:0, 2-18:1, 3-16:0, 4-16:1) phospholipase (3-position), mitochondrial membrane	H2O [mitochondrial membrane] + cardiolipin (1-16:0, 2-18:1, 3-16:0, 4-16:1) [mitochondrial membrane] -> H+ [mitochondrial membrane] + palmitate [mitochondrial membrane] + monolysocardiolipin (1-16:0, 2-18:1, 4-16:1) [mitochondrial membrane]	YGR110W	0	Inf	0		22345606		YGR110W
r_2615	CL (1-16:0, 2-18:1, 3-18:0, 4-16:1) phospholipase (3-position), mitochondrial membrane	H2O [mitochondrial membrane] + cardiolipin (1-16:0, 2-18:1, 3-18:0, 4-16:1) [mitochondrial membrane] -> H+ [mitochondrial membrane] + stearate [mitochondrial membrane] + monolysocardiolipin (1-16:0, 2-18:1, 4-16:1) [mitochondrial membrane]	YGR110W	0	Inf	0		22345606		YGR110W
r_2616	CL (1-16:0, 2-18:1, 3-16:0, 4-18:1) phospholipase (3-position), mitochondrial membrane	H2O [mitochondrial membrane] + cardiolipin (1-16:0, 2-18:1, 3-16:0, 4-18:1) [mitochondrial membrane] -> H+ [mitochondrial membrane] + palmitate [mitochondrial membrane] + monolysocardiolipin (1-16:0, 2-18:1, 4-18:1) [mitochondrial membrane]	YGR110W	0	Inf	0		22345606		YGR110W
r_2617	CL (1-16:1, 2-18:1, 3-16:0, 4-16:1) phospholipase (3-position), mitochondrial membrane	H2O [mitochondrial membrane] + cardiolipin (1-16:1, 2-18:1, 3-16:0, 4-16:1) [mitochondrial membrane] -> H+ [mitochondrial membrane] + palmitate [mitochondrial membrane] + monolysocardiolipin (1-16:1, 2-18:1, 4-16:1) [mitochondrial membrane]	YGR110W	0	Inf	0		22345606		YGR110W
r_2618	CL (1-16:1, 2-18:1, 3-18:0, 4-16:1) phospholipase (3-position), mitochondrial membrane	H2O [mitochondrial membrane] + cardiolipin (1-16:1, 2-18:1, 3-18:0, 4-16:1) [mitochondrial membrane] -> H+ [mitochondrial membrane] + stearate [mitochondrial membrane] + monolysocardiolipin (1-16:1, 2-18:1, 4-16:1) [mitochondrial membrane]	YGR110W	0	Inf	0		22345606		YGR110W
r_2619	CL (1-16:1, 2-18:1, 3-16:0, 4-18:1) phospholipase (3-position), mitochondrial membrane	H2O [mitochondrial membrane] + cardiolipin (1-16:1, 2-18:1, 3-16:0, 4-18:1) [mitochondrial membrane] -> H+ [mitochondrial membrane] + palmitate [mitochondrial membrane] + monolysocardiolipin (1-16:1, 2-18:1, 4-18:1) [mitochondrial membrane]	YGR110W	0	Inf	0		22345606		YGR110W
r_2620	MLCL (2-16:1, 3-16:0, 4-16:1):PC (1-16:0, 2-16:1) acyltransferase, mitochondrial membrane	monolysocardiolipin (2-16:1, 3-16:0, 4-16:1) [mitochondrial membrane] + phosphatidylcholine (1-16:0, 2-16:1) [mitochondrial membrane] <=> cardiolipin (1-16:1, 2-16:1, 3-16:0, 4-16:1) [mitochondrial membrane] + 1-acylglycerophosphocholine (16:0) [mitochondrial membrane]	YPR140W	-Inf	Inf	0		22345606		YPR140W
r_2621	MLCL (2-16:1, 3-16:0, 4-16:1):PC (1-16:1, 2-16:1) acyltransferase, mitochondrial membrane	monolysocardiolipin (2-16:1, 3-16:0, 4-16:1) [mitochondrial membrane] + phosphatidylcholine (1-16:1, 2-16:1) [mitochondrial membrane] <=> cardiolipin (1-16:1, 2-16:1, 3-16:0, 4-16:1) [mitochondrial membrane] + 1-acylglycerophosphocholine (16:1) [mitochondrial membrane]	YPR140W	-Inf	Inf	0		22345606		YPR140W
r_2622	MLCL (2-16:1, 3-16:0, 4-16:1):PC (1-18:0, 2-16:1) acyltransferase, mitochondrial membrane	monolysocardiolipin (2-16:1, 3-16:0, 4-16:1) [mitochondrial membrane] + phosphatidylcholine (1-18:0, 2-16:1) [mitochondrial membrane] <=> cardiolipin (1-16:1, 2-16:1, 3-16:0, 4-16:1) [mitochondrial membrane] + 1-acylglycerophosphocholine (18:0) [mitochondrial membrane]	YPR140W	-Inf	Inf	0		22345606		YPR140W
r_2623	MLCL (2-16:1, 3-16:0, 4-16:1):PC (1-18:1, 2-16:1) acyltransferase, mitochondrial membrane	monolysocardiolipin (2-16:1, 3-16:0, 4-16:1) [mitochondrial membrane] + phosphatidylcholine (1-18:1, 2-16:1) [mitochondrial membrane] <=> cardiolipin (1-16:1, 2-16:1, 3-16:0, 4-16:1) [mitochondrial membrane] + 1-acylglycerophosphocholine (18:1) [mitochondrial membrane]	YPR140W	-Inf	Inf	0		22345606		YPR140W
r_2624	MLCL (2-16:1, 3-16:0, 4-16:1):PC (1-16:0, 2-18:1) acyltransferase, mitochondrial membrane	monolysocardiolipin (2-16:1, 3-16:0, 4-16:1) [mitochondrial membrane] + phosphatidylcholine (1-16:0, 2-18:1) [mitochondrial membrane] <=> cardiolipin (1-18:1, 2-16:1, 3-16:0, 4-16:1) [mitochondrial membrane] + 1-acylglycerophosphocholine (16:0) [mitochondrial membrane]	YPR140W	-Inf	Inf	0		22345606		YPR140W
r_2625	MLCL (2-16:1, 3-16:0, 4-16:1):PC (1-16:1, 2-18:1) acyltransferase, mitochondrial membrane	monolysocardiolipin (2-16:1, 3-16:0, 4-16:1) [mitochondrial membrane] + phosphatidylcholine (1-16:1, 2-18:1) [mitochondrial membrane] <=> cardiolipin (1-18:1, 2-16:1, 3-16:0, 4-16:1) [mitochondrial membrane] + 1-acylglycerophosphocholine (16:1) [mitochondrial membrane]	YPR140W	-Inf	Inf	0		22345606		YPR140W
r_2626	MLCL (2-16:1, 3-16:0, 4-16:1):PC (1-18:0, 2-18:1) acyltransferase, mitochondrial membrane	monolysocardiolipin (2-16:1, 3-16:0, 4-16:1) [mitochondrial membrane] + phosphatidylcholine (1-18:0, 2-18:1) [mitochondrial membrane] <=> cardiolipin (1-18:1, 2-16:1, 3-16:0, 4-16:1) [mitochondrial membrane] + 1-acylglycerophosphocholine (18:0) [mitochondrial membrane]	YPR140W	-Inf	Inf	0		22345606		YPR140W
r_2627	MLCL (2-16:1, 3-16:0, 4-16:1):PC (1-18:1, 2-18:1) acyltransferase, mitochondrial membrane	monolysocardiolipin (2-16:1, 3-16:0, 4-16:1) [mitochondrial membrane] + phosphatidylcholine (1-18:1, 2-18:1) [mitochondrial membrane] <=> cardiolipin (1-18:1, 2-16:1, 3-16:0, 4-16:1) [mitochondrial membrane] + 1-acylglycerophosphocholine (18:1) [mitochondrial membrane]	YPR140W	-Inf	Inf	0		22345606		YPR140W
r_2628	MLCL (2-16:1, 3-16:1, 4-16:1):PC (1-16:0, 2-16:1) acyltransferase, mitochondrial membrane	monolysocardiolipin (2-16:1, 3-16:1, 4-16:1) [mitochondrial membrane] + phosphatidylcholine (1-16:0, 2-16:1) [mitochondrial membrane] <=> cardiolipin (1-16:1, 2-16:1, 3-16:1, 4-16:1) [mitochondrial membrane] + 1-acylglycerophosphocholine (16:0) [mitochondrial membrane]	YPR140W	-Inf	Inf	0		22345606		YPR140W
r_2629	MLCL (2-16:1, 3-16:1, 4-16:1):PC (1-16:1, 2-16:1) acyltransferase, mitochondrial membrane	monolysocardiolipin (2-16:1, 3-16:1, 4-16:1) [mitochondrial membrane] + phosphatidylcholine (1-16:1, 2-16:1) [mitochondrial membrane] <=> cardiolipin (1-16:1, 2-16:1, 3-16:1, 4-16:1) [mitochondrial membrane] + 1-acylglycerophosphocholine (16:1) [mitochondrial membrane]	YPR140W	-Inf	Inf	0		22345606		YPR140W
r_2630	MLCL (2-16:1, 3-16:1, 4-16:1):PC (1-18:0, 2-16:1) acyltransferase, mitochondrial membrane	monolysocardiolipin (2-16:1, 3-16:1, 4-16:1) [mitochondrial membrane] + phosphatidylcholine (1-18:0, 2-16:1) [mitochondrial membrane] <=> cardiolipin (1-16:1, 2-16:1, 3-16:1, 4-16:1) [mitochondrial membrane] + 1-acylglycerophosphocholine (18:0) [mitochondrial membrane]	YPR140W	-Inf	Inf	0		22345606		YPR140W
r_2631	MLCL (2-16:1, 3-16:1, 4-16:1):PC (1-18:1, 2-16:1) acyltransferase, mitochondrial membrane	monolysocardiolipin (2-16:1, 3-16:1, 4-16:1) [mitochondrial membrane] + phosphatidylcholine (1-18:1, 2-16:1) [mitochondrial membrane] <=> cardiolipin (1-16:1, 2-16:1, 3-16:1, 4-16:1) [mitochondrial membrane] + 1-acylglycerophosphocholine (18:1) [mitochondrial membrane]	YPR140W	-Inf	Inf	0		22345606		YPR140W
r_2632	MLCL (2-16:1, 3-16:1, 4-16:1):PC (1-16:0, 2-18:1) acyltransferase, mitochondrial membrane	monolysocardiolipin (2-16:1, 3-16:1, 4-16:1) [mitochondrial membrane] + phosphatidylcholine (1-16:0, 2-18:1) [mitochondrial membrane] <=> cardiolipin (1-18:1, 2-16:1, 3-16:1, 4-16:1) [mitochondrial membrane] + 1-acylglycerophosphocholine (16:0) [mitochondrial membrane]	YPR140W	-Inf	Inf	0		22345606		YPR140W
r_2633	MLCL (2-16:1, 3-16:1, 4-16:1):PC (1-16:1, 2-18:1) acyltransferase, mitochondrial membrane	monolysocardiolipin (2-16:1, 3-16:1, 4-16:1) [mitochondrial membrane] + phosphatidylcholine (1-16:1, 2-18:1) [mitochondrial membrane] <=> cardiolipin (1-18:1, 2-16:1, 3-16:1, 4-16:1) [mitochondrial membrane] + 1-acylglycerophosphocholine (16:1) [mitochondrial membrane]	YPR140W	-Inf	Inf	0		22345606		YPR140W
r_2634	MLCL (2-16:1, 3-16:1, 4-16:1):PC (1-18:0, 2-18:1) acyltransferase, mitochondrial membrane	monolysocardiolipin (2-16:1, 3-16:1, 4-16:1) [mitochondrial membrane] + phosphatidylcholine (1-18:0, 2-18:1) [mitochondrial membrane] <=> cardiolipin (1-18:1, 2-16:1, 3-16:1, 4-16:1) [mitochondrial membrane] + 1-acylglycerophosphocholine (18:0) [mitochondrial membrane]	YPR140W	-Inf	Inf	0		22345606		YPR140W
r_2635	MLCL (2-16:1, 3-16:1, 4-16:1):PC (1-18:1, 2-18:1) acyltransferase, mitochondrial membrane	monolysocardiolipin (2-16:1, 3-16:1, 4-16:1) [mitochondrial membrane] + phosphatidylcholine (1-18:1, 2-18:1) [mitochondrial membrane] <=> cardiolipin (1-18:1, 2-16:1, 3-16:1, 4-16:1) [mitochondrial membrane] + 1-acylglycerophosphocholine (18:1) [mitochondrial membrane]	YPR140W	-Inf	Inf	0		22345606		YPR140W
r_2636	MLCL (2-16:1, 3-18:0, 4-16:1):PC (1-16:0, 2-16:1) acyltransferase, mitochondrial membrane	monolysocardiolipin (2-16:1, 3-18:0, 4-16:1) [mitochondrial membrane] + phosphatidylcholine (1-16:0, 2-16:1) [mitochondrial membrane] <=> cardiolipin (1-16:1, 2-16:1, 3-18:0, 4-16:1) [mitochondrial membrane] + 1-acylglycerophosphocholine (16:0) [mitochondrial membrane]	YPR140W	-Inf	Inf	0		22345606		YPR140W
r_2637	MLCL (2-16:1, 3-18:0, 4-16:1):PC (1-16:1, 2-16:1) acyltransferase, mitochondrial membrane	monolysocardiolipin (2-16:1, 3-18:0, 4-16:1) [mitochondrial membrane] + phosphatidylcholine (1-16:1, 2-16:1) [mitochondrial membrane] <=> cardiolipin (1-16:1, 2-16:1, 3-18:0, 4-16:1) [mitochondrial membrane] + 1-acylglycerophosphocholine (16:1) [mitochondrial membrane]	YPR140W	-Inf	Inf	0		22345606		YPR140W
r_2638	MLCL (2-16:1, 3-18:0, 4-16:1):PC (1-18:0, 2-16:1) acyltransferase, mitochondrial membrane	monolysocardiolipin (2-16:1, 3-18:0, 4-16:1) [mitochondrial membrane] + phosphatidylcholine (1-18:0, 2-16:1) [mitochondrial membrane] <=> cardiolipin (1-16:1, 2-16:1, 3-18:0, 4-16:1) [mitochondrial membrane] + 1-acylglycerophosphocholine (18:0) [mitochondrial membrane]	YPR140W	-Inf	Inf	0		22345606		YPR140W
r_2639	MLCL (2-16:1, 3-18:0, 4-16:1):PC (1-18:1, 2-16:1) acyltransferase, mitochondrial membrane	monolysocardiolipin (2-16:1, 3-18:0, 4-16:1) [mitochondrial membrane] + phosphatidylcholine (1-18:1, 2-16:1) [mitochondrial membrane] <=> cardiolipin (1-16:1, 2-16:1, 3-18:0, 4-16:1) [mitochondrial membrane] + 1-acylglycerophosphocholine (18:1) [mitochondrial membrane]	YPR140W	-Inf	Inf	0		22345606		YPR140W
r_2640	MLCL (2-16:1, 3-18:0, 4-16:1):PC (1-16:0, 2-18:1) acyltransferase, mitochondrial membrane	monolysocardiolipin (2-16:1, 3-18:0, 4-16:1) [mitochondrial membrane] + phosphatidylcholine (1-16:0, 2-18:1) [mitochondrial membrane] <=> cardiolipin (1-18:1, 2-16:1, 3-18:0, 4-16:1) [mitochondrial membrane] + 1-acylglycerophosphocholine (16:0) [mitochondrial membrane]	YPR140W	-Inf	Inf	0		22345606		YPR140W
r_2641	MLCL (2-16:1, 3-18:0, 4-16:1):PC (1-16:1, 2-18:1) acyltransferase, mitochondrial membrane	monolysocardiolipin (2-16:1, 3-18:0, 4-16:1) [mitochondrial membrane] + phosphatidylcholine (1-16:1, 2-18:1) [mitochondrial membrane] <=> cardiolipin (1-18:1, 2-16:1, 3-18:0, 4-16:1) [mitochondrial membrane] + 1-acylglycerophosphocholine (16:1) [mitochondrial membrane]	YPR140W	-Inf	Inf	0		22345606		YPR140W
r_2642	MLCL (2-16:1, 3-18:0, 4-16:1):PC (1-18:0, 2-18:1) acyltransferase, mitochondrial membrane	monolysocardiolipin (2-16:1, 3-18:0, 4-16:1) [mitochondrial membrane] + phosphatidylcholine (1-18:0, 2-18:1) [mitochondrial membrane] <=> cardiolipin (1-18:1, 2-16:1, 3-18:0, 4-16:1) [mitochondrial membrane] + 1-acylglycerophosphocholine (18:0) [mitochondrial membrane]	YPR140W	-Inf	Inf	0		22345606		YPR140W
r_2643	MLCL (2-16:1, 3-18:0, 4-16:1):PC (1-18:1, 2-18:1) acyltransferase, mitochondrial membrane	monolysocardiolipin (2-16:1, 3-18:0, 4-16:1) [mitochondrial membrane] + phosphatidylcholine (1-18:1, 2-18:1) [mitochondrial membrane] <=> cardiolipin (1-18:1, 2-16:1, 3-18:0, 4-16:1) [mitochondrial membrane] + 1-acylglycerophosphocholine (18:1) [mitochondrial membrane]	YPR140W	-Inf	Inf	0		22345606		YPR140W
r_2644	MLCL (2-16:1, 3-18:1, 4-16:1):PC (1-16:0, 2-16:1) acyltransferase, mitochondrial membrane	monolysocardiolipin (2-16:1, 3-18:1, 4-16:1) [mitochondrial membrane] + phosphatidylcholine (1-16:0, 2-16:1) [mitochondrial membrane] <=> cardiolipin (1-16:1, 2-16:1, 3-18:1, 4-16:1) [mitochondrial membrane] + 1-acylglycerophosphocholine (16:0) [mitochondrial membrane]	YPR140W	-Inf	Inf	0		22345606		YPR140W
r_2645	MLCL (2-16:1, 3-18:1, 4-16:1):PC (1-16:1, 2-16:1) acyltransferase, mitochondrial membrane	monolysocardiolipin (2-16:1, 3-18:1, 4-16:1) [mitochondrial membrane] + phosphatidylcholine (1-16:1, 2-16:1) [mitochondrial membrane] <=> cardiolipin (1-16:1, 2-16:1, 3-18:1, 4-16:1) [mitochondrial membrane] + 1-acylglycerophosphocholine (16:1) [mitochondrial membrane]	YPR140W	-Inf	Inf	0		22345606		YPR140W
r_2646	MLCL (2-16:1, 3-18:1, 4-16:1):PC (1-18:0, 2-16:1) acyltransferase, mitochondrial membrane	monolysocardiolipin (2-16:1, 3-18:1, 4-16:1) [mitochondrial membrane] + phosphatidylcholine (1-18:0, 2-16:1) [mitochondrial membrane] <=> cardiolipin (1-16:1, 2-16:1, 3-18:1, 4-16:1) [mitochondrial membrane] + 1-acylglycerophosphocholine (18:0) [mitochondrial membrane]	YPR140W	-Inf	Inf	0		22345606		YPR140W
r_2647	MLCL (2-16:1, 3-18:1, 4-16:1):PC (1-18:1, 2-16:1) acyltransferase, mitochondrial membrane	monolysocardiolipin (2-16:1, 3-18:1, 4-16:1) [mitochondrial membrane] + phosphatidylcholine (1-18:1, 2-16:1) [mitochondrial membrane] <=> cardiolipin (1-16:1, 2-16:1, 3-18:1, 4-16:1) [mitochondrial membrane] + 1-acylglycerophosphocholine (18:1) [mitochondrial membrane]	YPR140W	-Inf	Inf	0		22345606		YPR140W
r_2648	MLCL (2-16:1, 3-18:1, 4-16:1):PC (1-16:0, 2-18:1) acyltransferase, mitochondrial membrane	monolysocardiolipin (2-16:1, 3-18:1, 4-16:1) [mitochondrial membrane] + phosphatidylcholine (1-16:0, 2-18:1) [mitochondrial membrane] <=> cardiolipin (1-18:1, 2-16:1, 3-18:1, 4-16:1) [mitochondrial membrane] + 1-acylglycerophosphocholine (16:0) [mitochondrial membrane]	YPR140W	-Inf	Inf	0		22345606		YPR140W
r_2649	MLCL (2-16:1, 3-18:1, 4-16:1):PC (1-16:1, 2-18:1) acyltransferase, mitochondrial membrane	monolysocardiolipin (2-16:1, 3-18:1, 4-16:1) [mitochondrial membrane] + phosphatidylcholine (1-16:1, 2-18:1) [mitochondrial membrane] <=> cardiolipin (1-18:1, 2-16:1, 3-18:1, 4-16:1) [mitochondrial membrane] + 1-acylglycerophosphocholine (16:1) [mitochondrial membrane]	YPR140W	-Inf	Inf	0		22345606		YPR140W
r_2650	MLCL (2-16:1, 3-18:1, 4-16:1):PC (1-18:0, 2-18:1) acyltransferase, mitochondrial membrane	monolysocardiolipin (2-16:1, 3-18:1, 4-16:1) [mitochondrial membrane] + phosphatidylcholine (1-18:0, 2-18:1) [mitochondrial membrane] <=> cardiolipin (1-18:1, 2-16:1, 3-18:1, 4-16:1) [mitochondrial membrane] + 1-acylglycerophosphocholine (18:0) [mitochondrial membrane]	YPR140W	-Inf	Inf	0		22345606		YPR140W
r_2651	MLCL (2-16:1, 3-18:1, 4-16:1):PC (1-18:1, 2-18:1) acyltransferase, mitochondrial membrane	monolysocardiolipin (2-16:1, 3-18:1, 4-16:1) [mitochondrial membrane] + phosphatidylcholine (1-18:1, 2-18:1) [mitochondrial membrane] <=> cardiolipin (1-18:1, 2-16:1, 3-18:1, 4-16:1) [mitochondrial membrane] + 1-acylglycerophosphocholine (18:1) [mitochondrial membrane]	YPR140W	-Inf	Inf	0		22345606		YPR140W
r_2652	MLCL (2-16:1, 3-16:0, 4-18:1):PC (1-16:0, 2-16:1) acyltransferase, mitochondrial membrane	monolysocardiolipin (2-16:1, 3-16:0, 4-18:1) [mitochondrial membrane] + phosphatidylcholine (1-16:0, 2-16:1) [mitochondrial membrane] <=> cardiolipin (1-16:1, 2-16:1, 3-16:0, 4-18:1) [mitochondrial membrane] + 1-acylglycerophosphocholine (16:0) [mitochondrial membrane]	YPR140W	-Inf	Inf	0		22345606		YPR140W
r_2653	MLCL (2-16:1, 3-16:0, 4-18:1):PC (1-16:1, 2-16:1) acyltransferase, mitochondrial membrane	monolysocardiolipin (2-16:1, 3-16:0, 4-18:1) [mitochondrial membrane] + phosphatidylcholine (1-16:1, 2-16:1) [mitochondrial membrane] <=> cardiolipin (1-16:1, 2-16:1, 3-16:0, 4-18:1) [mitochondrial membrane] + 1-acylglycerophosphocholine (16:1) [mitochondrial membrane]	YPR140W	-Inf	Inf	0		22345606		YPR140W
r_2654	MLCL (2-16:1, 3-16:0, 4-18:1):PC (1-18:0, 2-16:1) acyltransferase, mitochondrial membrane	monolysocardiolipin (2-16:1, 3-16:0, 4-18:1) [mitochondrial membrane] + phosphatidylcholine (1-18:0, 2-16:1) [mitochondrial membrane] <=> cardiolipin (1-16:1, 2-16:1, 3-16:0, 4-18:1) [mitochondrial membrane] + 1-acylglycerophosphocholine (18:0) [mitochondrial membrane]	YPR140W	-Inf	Inf	0		22345606		YPR140W
r_2655	MLCL (2-16:1, 3-16:0, 4-18:1):PC (1-18:1, 2-16:1) acyltransferase, mitochondrial membrane	monolysocardiolipin (2-16:1, 3-16:0, 4-18:1) [mitochondrial membrane] + phosphatidylcholine (1-18:1, 2-16:1) [mitochondrial membrane] <=> cardiolipin (1-16:1, 2-16:1, 3-16:0, 4-18:1) [mitochondrial membrane] + 1-acylglycerophosphocholine (18:1) [mitochondrial membrane]	YPR140W	-Inf	Inf	0		22345606		YPR140W
r_2656	MLCL (2-16:1, 3-16:0, 4-18:1):PC (1-16:0, 2-18:1) acyltransferase, mitochondrial membrane	monolysocardiolipin (2-16:1, 3-16:0, 4-18:1) [mitochondrial membrane] + phosphatidylcholine (1-16:0, 2-18:1) [mitochondrial membrane] <=> cardiolipin (1-18:1, 2-16:1, 3-16:0, 4-18:1) [mitochondrial membrane] + 1-acylglycerophosphocholine (16:0) [mitochondrial membrane]	YPR140W	-Inf	Inf	0		22345606		YPR140W
r_2657	MLCL (2-16:1, 3-16:0, 4-18:1):PC (1-16:1, 2-18:1) acyltransferase, mitochondrial membrane	monolysocardiolipin (2-16:1, 3-16:0, 4-18:1) [mitochondrial membrane] + phosphatidylcholine (1-16:1, 2-18:1) [mitochondrial membrane] <=> cardiolipin (1-18:1, 2-16:1, 3-16:0, 4-18:1) [mitochondrial membrane] + 1-acylglycerophosphocholine (16:1) [mitochondrial membrane]	YPR140W	-Inf	Inf	0		22345606		YPR140W
r_2658	MLCL (2-16:1, 3-16:0, 4-18:1):PC (1-18:0, 2-18:1) acyltransferase, mitochondrial membrane	monolysocardiolipin (2-16:1, 3-16:0, 4-18:1) [mitochondrial membrane] + phosphatidylcholine (1-18:0, 2-18:1) [mitochondrial membrane] <=> cardiolipin (1-18:1, 2-16:1, 3-16:0, 4-18:1) [mitochondrial membrane] + 1-acylglycerophosphocholine (18:0) [mitochondrial membrane]	YPR140W	-Inf	Inf	0		22345606		YPR140W
r_2659	MLCL (2-16:1, 3-16:0, 4-18:1):PC (1-18:1, 2-18:1) acyltransferase, mitochondrial membrane	monolysocardiolipin (2-16:1, 3-16:0, 4-18:1) [mitochondrial membrane] + phosphatidylcholine (1-18:1, 2-18:1) [mitochondrial membrane] <=> cardiolipin (1-18:1, 2-16:1, 3-16:0, 4-18:1) [mitochondrial membrane] + 1-acylglycerophosphocholine (18:1) [mitochondrial membrane]	YPR140W	-Inf	Inf	0		22345606		YPR140W
r_2660	MLCL (2-16:1, 3-16:1, 4-18:1):PC (1-16:0, 2-16:1) acyltransferase, mitochondrial membrane	monolysocardiolipin (2-16:1, 3-16:1, 4-18:1) [mitochondrial membrane] + phosphatidylcholine (1-16:0, 2-16:1) [mitochondrial membrane] <=> cardiolipin (1-16:1, 2-16:1, 3-16:1, 4-18:1) [mitochondrial membrane] + 1-acylglycerophosphocholine (16:0) [mitochondrial membrane]	YPR140W	-Inf	Inf	0		22345606		YPR140W
r_2661	MLCL (2-16:1, 3-16:1, 4-18:1):PC (1-16:1, 2-16:1) acyltransferase, mitochondrial membrane	monolysocardiolipin (2-16:1, 3-16:1, 4-18:1) [mitochondrial membrane] + phosphatidylcholine (1-16:1, 2-16:1) [mitochondrial membrane] <=> cardiolipin (1-16:1, 2-16:1, 3-16:1, 4-18:1) [mitochondrial membrane] + 1-acylglycerophosphocholine (16:1) [mitochondrial membrane]	YPR140W	-Inf	Inf	0		22345606		YPR140W
r_2662	MLCL (2-16:1, 3-16:1, 4-18:1):PC (1-18:0, 2-16:1) acyltransferase, mitochondrial membrane	monolysocardiolipin (2-16:1, 3-16:1, 4-18:1) [mitochondrial membrane] + phosphatidylcholine (1-18:0, 2-16:1) [mitochondrial membrane] <=> cardiolipin (1-16:1, 2-16:1, 3-16:1, 4-18:1) [mitochondrial membrane] + 1-acylglycerophosphocholine (18:0) [mitochondrial membrane]	YPR140W	-Inf	Inf	0		22345606		YPR140W
r_2663	MLCL (2-16:1, 3-16:1, 4-18:1):PC (1-18:1, 2-16:1) acyltransferase, mitochondrial membrane	monolysocardiolipin (2-16:1, 3-16:1, 4-18:1) [mitochondrial membrane] + phosphatidylcholine (1-18:1, 2-16:1) [mitochondrial membrane] <=> cardiolipin (1-16:1, 2-16:1, 3-16:1, 4-18:1) [mitochondrial membrane] + 1-acylglycerophosphocholine (18:1) [mitochondrial membrane]	YPR140W	-Inf	Inf	0		22345606		YPR140W
r_2664	MLCL (2-16:1, 3-16:1, 4-18:1):PC (1-16:0, 2-18:1) acyltransferase, mitochondrial membrane	monolysocardiolipin (2-16:1, 3-16:1, 4-18:1) [mitochondrial membrane] + phosphatidylcholine (1-16:0, 2-18:1) [mitochondrial membrane] <=> cardiolipin (1-18:1, 2-16:1, 3-16:1, 4-18:1) [mitochondrial membrane] + 1-acylglycerophosphocholine (16:0) [mitochondrial membrane]	YPR140W	-Inf	Inf	0		22345606		YPR140W
r_2665	MLCL (2-16:1, 3-16:1, 4-18:1):PC (1-16:1, 2-18:1) acyltransferase, mitochondrial membrane	monolysocardiolipin (2-16:1, 3-16:1, 4-18:1) [mitochondrial membrane] + phosphatidylcholine (1-16:1, 2-18:1) [mitochondrial membrane] <=> cardiolipin (1-18:1, 2-16:1, 3-16:1, 4-18:1) [mitochondrial membrane] + 1-acylglycerophosphocholine (16:1) [mitochondrial membrane]	YPR140W	-Inf	Inf	0		22345606		YPR140W
r_2666	MLCL (2-16:1, 3-16:1, 4-18:1):PC (1-18:0, 2-18:1) acyltransferase, mitochondrial membrane	monolysocardiolipin (2-16:1, 3-16:1, 4-18:1) [mitochondrial membrane] + phosphatidylcholine (1-18:0, 2-18:1) [mitochondrial membrane] <=> cardiolipin (1-18:1, 2-16:1, 3-16:1, 4-18:1) [mitochondrial membrane] + 1-acylglycerophosphocholine (18:0) [mitochondrial membrane]	YPR140W	-Inf	Inf	0		22345606		YPR140W
r_2667	MLCL (2-16:1, 3-16:1, 4-18:1):PC (1-18:1, 2-18:1) acyltransferase, mitochondrial membrane	monolysocardiolipin (2-16:1, 3-16:1, 4-18:1) [mitochondrial membrane] + phosphatidylcholine (1-18:1, 2-18:1) [mitochondrial membrane] <=> cardiolipin (1-18:1, 2-16:1, 3-16:1, 4-18:1) [mitochondrial membrane] + 1-acylglycerophosphocholine (18:1) [mitochondrial membrane]	YPR140W	-Inf	Inf	0		22345606		YPR140W
r_2668	MLCL (2-18:1, 3-16:0, 4-16:1):PC (1-16:0, 2-16:1) acyltransferase, mitochondrial membrane	monolysocardiolipin (2-18:1, 3-16:0, 4-16:1) [mitochondrial membrane] + phosphatidylcholine (1-16:0, 2-16:1) [mitochondrial membrane] <=> cardiolipin (1-16:1, 2-18:1, 3-16:0, 4-16:1) [mitochondrial membrane] + 1-acylglycerophosphocholine (16:0) [mitochondrial membrane]	YPR140W	-Inf	Inf	0		22345606		YPR140W
r_2669	MLCL (2-18:1, 3-16:0, 4-16:1):PC (1-16:1, 2-16:1) acyltransferase, mitochondrial membrane	monolysocardiolipin (2-18:1, 3-16:0, 4-16:1) [mitochondrial membrane] + phosphatidylcholine (1-16:1, 2-16:1) [mitochondrial membrane] <=> cardiolipin (1-16:1, 2-18:1, 3-16:0, 4-16:1) [mitochondrial membrane] + 1-acylglycerophosphocholine (16:1) [mitochondrial membrane]	YPR140W	-Inf	Inf	0		22345606		YPR140W
r_2670	MLCL (2-18:1, 3-16:0, 4-16:1):PC (1-18:0, 2-16:1) acyltransferase, mitochondrial membrane	monolysocardiolipin (2-18:1, 3-16:0, 4-16:1) [mitochondrial membrane] + phosphatidylcholine (1-18:0, 2-16:1) [mitochondrial membrane] <=> cardiolipin (1-16:1, 2-18:1, 3-16:0, 4-16:1) [mitochondrial membrane] + 1-acylglycerophosphocholine (18:0) [mitochondrial membrane]	YPR140W	-Inf	Inf	0		22345606		YPR140W
r_2671	MLCL (2-18:1, 3-16:0, 4-16:1):PC (1-18:1, 2-16:1) acyltransferase, mitochondrial membrane	monolysocardiolipin (2-18:1, 3-16:0, 4-16:1) [mitochondrial membrane] + phosphatidylcholine (1-18:1, 2-16:1) [mitochondrial membrane] <=> cardiolipin (1-16:1, 2-18:1, 3-16:0, 4-16:1) [mitochondrial membrane] + 1-acylglycerophosphocholine (18:1) [mitochondrial membrane]	YPR140W	-Inf	Inf	0		22345606		YPR140W
r_2672	MLCL (2-18:1, 3-16:0, 4-16:1):PC (1-16:0, 2-18:1) acyltransferase, mitochondrial membrane	monolysocardiolipin (2-18:1, 3-16:0, 4-16:1) [mitochondrial membrane] + phosphatidylcholine (1-16:0, 2-18:1) [mitochondrial membrane] <=> 1-acylglycerophosphocholine (16:0) [mitochondrial membrane] + cardiolipin (1-18:1, 2-18:1, 3-16:0, 4-16:1) [mitochondrial membrane]	YPR140W	-Inf	Inf	0		22345606		YPR140W
r_2673	MLCL (2-18:1, 3-16:0, 4-16:1):PC (1-16:1, 2-18:1) acyltransferase, mitochondrial membrane	monolysocardiolipin (2-18:1, 3-16:0, 4-16:1) [mitochondrial membrane] + phosphatidylcholine (1-16:1, 2-18:1) [mitochondrial membrane] <=> 1-acylglycerophosphocholine (16:1) [mitochondrial membrane] + cardiolipin (1-18:1, 2-18:1, 3-16:0, 4-16:1) [mitochondrial membrane]	YPR140W	-Inf	Inf	0		22345606		YPR140W
r_2674	MLCL (2-18:1, 3-16:0, 4-16:1):PC (1-18:0, 2-18:1) acyltransferase, mitochondrial membrane	monolysocardiolipin (2-18:1, 3-16:0, 4-16:1) [mitochondrial membrane] + phosphatidylcholine (1-18:0, 2-18:1) [mitochondrial membrane] <=> 1-acylglycerophosphocholine (18:0) [mitochondrial membrane] + cardiolipin (1-18:1, 2-18:1, 3-16:0, 4-16:1) [mitochondrial membrane]	YPR140W	-Inf	Inf	0		22345606		YPR140W
r_2675	MLCL (2-18:1, 3-16:0, 4-16:1):PC (1-18:1, 2-18:1) acyltransferase, mitochondrial membrane	monolysocardiolipin (2-18:1, 3-16:0, 4-16:1) [mitochondrial membrane] + phosphatidylcholine (1-18:1, 2-18:1) [mitochondrial membrane] <=> 1-acylglycerophosphocholine (18:1) [mitochondrial membrane] + cardiolipin (1-18:1, 2-18:1, 3-16:0, 4-16:1) [mitochondrial membrane]	YPR140W	-Inf	Inf	0		22345606		YPR140W
r_2676	MLCL (2-18:1, 3-16:1, 4-16:1):PC (1-16:0, 2-16:1) acyltransferase, mitochondrial membrane	monolysocardiolipin (2-18:1, 3-16:1, 4-16:1) [mitochondrial membrane] + phosphatidylcholine (1-16:0, 2-16:1) [mitochondrial membrane] <=> cardiolipin (1-16:1, 2-18:1, 3-16:1, 4-16:1) [mitochondrial membrane] + 1-acylglycerophosphocholine (16:0) [mitochondrial membrane]	YPR140W	-Inf	Inf	0		22345606		YPR140W
r_2677	MLCL (2-18:1, 3-16:1, 4-16:1):PC (1-16:1, 2-16:1) acyltransferase, mitochondrial membrane	monolysocardiolipin (2-18:1, 3-16:1, 4-16:1) [mitochondrial membrane] + phosphatidylcholine (1-16:1, 2-16:1) [mitochondrial membrane] <=> cardiolipin (1-16:1, 2-18:1, 3-16:1, 4-16:1) [mitochondrial membrane] + 1-acylglycerophosphocholine (16:1) [mitochondrial membrane]	YPR140W	-Inf	Inf	0		22345606		YPR140W
r_2678	MLCL (2-18:1, 3-16:1, 4-16:1):PC (1-18:0, 2-16:1) acyltransferase, mitochondrial membrane	monolysocardiolipin (2-18:1, 3-16:1, 4-16:1) [mitochondrial membrane] + phosphatidylcholine (1-18:0, 2-16:1) [mitochondrial membrane] <=> cardiolipin (1-16:1, 2-18:1, 3-16:1, 4-16:1) [mitochondrial membrane] + 1-acylglycerophosphocholine (18:0) [mitochondrial membrane]	YPR140W	-Inf	Inf	0		22345606		YPR140W
r_2679	MLCL (2-18:1, 3-16:1, 4-16:1):PC (1-18:1, 2-16:1) acyltransferase, mitochondrial membrane	monolysocardiolipin (2-18:1, 3-16:1, 4-16:1) [mitochondrial membrane] + phosphatidylcholine (1-18:1, 2-16:1) [mitochondrial membrane] <=> cardiolipin (1-16:1, 2-18:1, 3-16:1, 4-16:1) [mitochondrial membrane] + 1-acylglycerophosphocholine (18:1) [mitochondrial membrane]	YPR140W	-Inf	Inf	0		22345606		YPR140W
r_2680	MLCL (2-18:1, 3-16:1, 4-16:1):PC (1-16:0, 2-18:1) acyltransferase, mitochondrial membrane	monolysocardiolipin (2-18:1, 3-16:1, 4-16:1) [mitochondrial membrane] + phosphatidylcholine (1-16:0, 2-18:1) [mitochondrial membrane] <=> 1-acylglycerophosphocholine (16:0) [mitochondrial membrane] + cardiolipin (1-18:1, 2-18:1, 3-16:1, 4-16:1) [mitochondrial membrane]	YPR140W	-Inf	Inf	0		22345606		YPR140W
r_2681	MLCL (2-18:1, 3-16:1, 4-16:1):PC (1-16:1, 2-18:1) acyltransferase, mitochondrial membrane	monolysocardiolipin (2-18:1, 3-16:1, 4-16:1) [mitochondrial membrane] + phosphatidylcholine (1-16:1, 2-18:1) [mitochondrial membrane] <=> 1-acylglycerophosphocholine (16:1) [mitochondrial membrane] + cardiolipin (1-18:1, 2-18:1, 3-16:1, 4-16:1) [mitochondrial membrane]	YPR140W	-Inf	Inf	0		22345606		YPR140W
r_2682	MLCL (2-18:1, 3-16:1, 4-16:1):PC (1-18:0, 2-18:1) acyltransferase, mitochondrial membrane	monolysocardiolipin (2-18:1, 3-16:1, 4-16:1) [mitochondrial membrane] + phosphatidylcholine (1-18:0, 2-18:1) [mitochondrial membrane] <=> 1-acylglycerophosphocholine (18:0) [mitochondrial membrane] + cardiolipin (1-18:1, 2-18:1, 3-16:1, 4-16:1) [mitochondrial membrane]	YPR140W	-Inf	Inf	0		22345606		YPR140W
r_2683	MLCL (2-18:1, 3-16:1, 4-16:1):PC (1-18:1, 2-18:1) acyltransferase, mitochondrial membrane	monolysocardiolipin (2-18:1, 3-16:1, 4-16:1) [mitochondrial membrane] + phosphatidylcholine (1-18:1, 2-18:1) [mitochondrial membrane] <=> 1-acylglycerophosphocholine (18:1) [mitochondrial membrane] + cardiolipin (1-18:1, 2-18:1, 3-16:1, 4-16:1) [mitochondrial membrane]	YPR140W	-Inf	Inf	0		22345606		YPR140W
r_2684	MLCL (2-18:1, 3-18:0, 4-16:1):PC (1-16:0, 2-16:1) acyltransferase, mitochondrial membrane	monolysocardiolipin (2-18:1, 3-18:0, 4-16:1) [mitochondrial membrane] + phosphatidylcholine (1-16:0, 2-16:1) [mitochondrial membrane] <=> cardiolipin (1-16:1, 2-18:1, 3-18:0, 4-16:1) [mitochondrial membrane] + 1-acylglycerophosphocholine (16:0) [mitochondrial membrane]	YPR140W	-Inf	Inf	0		22345606		YPR140W
r_2685	MLCL (2-18:1, 3-18:0, 4-16:1):PC (1-16:1, 2-16:1) acyltransferase, mitochondrial membrane	monolysocardiolipin (2-18:1, 3-18:0, 4-16:1) [mitochondrial membrane] + phosphatidylcholine (1-16:1, 2-16:1) [mitochondrial membrane] <=> cardiolipin (1-16:1, 2-18:1, 3-18:0, 4-16:1) [mitochondrial membrane] + 1-acylglycerophosphocholine (16:1) [mitochondrial membrane]	YPR140W	-Inf	Inf	0		22345606		YPR140W
r_2686	MLCL (2-18:1, 3-18:0, 4-16:1):PC (1-18:0, 2-16:1) acyltransferase, mitochondrial membrane	monolysocardiolipin (2-18:1, 3-18:0, 4-16:1) [mitochondrial membrane] + phosphatidylcholine (1-18:0, 2-16:1) [mitochondrial membrane] <=> cardiolipin (1-16:1, 2-18:1, 3-18:0, 4-16:1) [mitochondrial membrane] + 1-acylglycerophosphocholine (18:0) [mitochondrial membrane]	YPR140W	-Inf	Inf	0		22345606		YPR140W
r_2687	MLCL (2-18:1, 3-18:0, 4-16:1):PC (1-18:1, 2-16:1) acyltransferase, mitochondrial membrane	monolysocardiolipin (2-18:1, 3-18:0, 4-16:1) [mitochondrial membrane] + phosphatidylcholine (1-18:1, 2-16:1) [mitochondrial membrane] <=> cardiolipin (1-16:1, 2-18:1, 3-18:0, 4-16:1) [mitochondrial membrane] + 1-acylglycerophosphocholine (18:1) [mitochondrial membrane]	YPR140W	-Inf	Inf	0		22345606		YPR140W
r_2688	MLCL (2-18:1, 3-18:0, 4-16:1):PC (1-16:0, 2-18:1) acyltransferase, mitochondrial membrane	monolysocardiolipin (2-18:1, 3-18:0, 4-16:1) [mitochondrial membrane] + phosphatidylcholine (1-16:0, 2-18:1) [mitochondrial membrane] <=> 1-acylglycerophosphocholine (16:0) [mitochondrial membrane] + cardiolipin (1-18:1, 2-18:1, 3-18:0, 4-16:1) [mitochondrial membrane]	YPR140W	-Inf	Inf	0		22345606		YPR140W
r_2689	MLCL (2-18:1, 3-18:0, 4-16:1):PC (1-16:1, 2-18:1) acyltransferase, mitochondrial membrane	monolysocardiolipin (2-18:1, 3-18:0, 4-16:1) [mitochondrial membrane] + phosphatidylcholine (1-16:1, 2-18:1) [mitochondrial membrane] <=> 1-acylglycerophosphocholine (16:1) [mitochondrial membrane] + cardiolipin (1-18:1, 2-18:1, 3-18:0, 4-16:1) [mitochondrial membrane]	YPR140W	-Inf	Inf	0		22345606		YPR140W
r_2690	MLCL (2-18:1, 3-18:0, 4-16:1):PC (1-18:0, 2-18:1) acyltransferase, mitochondrial membrane	monolysocardiolipin (2-18:1, 3-18:0, 4-16:1) [mitochondrial membrane] + phosphatidylcholine (1-18:0, 2-18:1) [mitochondrial membrane] <=> 1-acylglycerophosphocholine (18:0) [mitochondrial membrane] + cardiolipin (1-18:1, 2-18:1, 3-18:0, 4-16:1) [mitochondrial membrane]	YPR140W	-Inf	Inf	0		22345606		YPR140W
r_2691	MLCL (2-18:1, 3-18:0, 4-16:1):PC (1-18:1, 2-18:1) acyltransferase, mitochondrial membrane	monolysocardiolipin (2-18:1, 3-18:0, 4-16:1) [mitochondrial membrane] + phosphatidylcholine (1-18:1, 2-18:1) [mitochondrial membrane] <=> 1-acylglycerophosphocholine (18:1) [mitochondrial membrane] + cardiolipin (1-18:1, 2-18:1, 3-18:0, 4-16:1) [mitochondrial membrane]	YPR140W	-Inf	Inf	0		22345606		YPR140W
r_2692	MLCL (2-18:1, 3-18:1, 4-16:1):PC (1-16:0, 2-16:1) acyltransferase, mitochondrial membrane	monolysocardiolipin (2-18:1, 3-18:1, 4-16:1) [mitochondrial membrane] + phosphatidylcholine (1-16:0, 2-16:1) [mitochondrial membrane] <=> cardiolipin (1-16:1, 2-18:1, 3-18:1, 4-16:1) [mitochondrial membrane] + 1-acylglycerophosphocholine (16:0) [mitochondrial membrane]	YPR140W	-Inf	Inf	0		22345606		YPR140W
r_2693	MLCL (2-18:1, 3-18:1, 4-16:1):PC (1-16:1, 2-16:1) acyltransferase, mitochondrial membrane	monolysocardiolipin (2-18:1, 3-18:1, 4-16:1) [mitochondrial membrane] + phosphatidylcholine (1-16:1, 2-16:1) [mitochondrial membrane] <=> cardiolipin (1-16:1, 2-18:1, 3-18:1, 4-16:1) [mitochondrial membrane] + 1-acylglycerophosphocholine (16:1) [mitochondrial membrane]	YPR140W	-Inf	Inf	0		22345606		YPR140W
r_2694	MLCL (2-18:1, 3-18:1, 4-16:1):PC (1-18:0, 2-16:1) acyltransferase, mitochondrial membrane	monolysocardiolipin (2-18:1, 3-18:1, 4-16:1) [mitochondrial membrane] + phosphatidylcholine (1-18:0, 2-16:1) [mitochondrial membrane] <=> cardiolipin (1-16:1, 2-18:1, 3-18:1, 4-16:1) [mitochondrial membrane] + 1-acylglycerophosphocholine (18:0) [mitochondrial membrane]	YPR140W	-Inf	Inf	0		22345606		YPR140W
r_2695	MLCL (2-18:1, 3-18:1, 4-16:1):PC (1-18:1, 2-16:1) acyltransferase, mitochondrial membrane	monolysocardiolipin (2-18:1, 3-18:1, 4-16:1) [mitochondrial membrane] + phosphatidylcholine (1-18:1, 2-16:1) [mitochondrial membrane] <=> cardiolipin (1-16:1, 2-18:1, 3-18:1, 4-16:1) [mitochondrial membrane] + 1-acylglycerophosphocholine (18:1) [mitochondrial membrane]	YPR140W	-Inf	Inf	0		22345606		YPR140W
r_2696	MLCL (2-18:1, 3-18:1, 4-16:1):PC (1-16:0, 2-18:1) acyltransferase, mitochondrial membrane	monolysocardiolipin (2-18:1, 3-18:1, 4-16:1) [mitochondrial membrane] + phosphatidylcholine (1-16:0, 2-18:1) [mitochondrial membrane] <=> 1-acylglycerophosphocholine (16:0) [mitochondrial membrane] + cardiolipin (1-18:1, 2-18:1, 3-18:1, 4-16:1) [mitochondrial membrane]	YPR140W	-Inf	Inf	0		22345606		YPR140W
r_2697	MLCL (2-18:1, 3-18:1, 4-16:1):PC (1-16:1, 2-18:1) acyltransferase, mitochondrial membrane	monolysocardiolipin (2-18:1, 3-18:1, 4-16:1) [mitochondrial membrane] + phosphatidylcholine (1-16:1, 2-18:1) [mitochondrial membrane] <=> 1-acylglycerophosphocholine (16:1) [mitochondrial membrane] + cardiolipin (1-18:1, 2-18:1, 3-18:1, 4-16:1) [mitochondrial membrane]	YPR140W	-Inf	Inf	0		22345606		YPR140W
r_2698	MLCL (2-18:1, 3-18:1, 4-16:1):PC (1-18:0, 2-18:1) acyltransferase, mitochondrial membrane	monolysocardiolipin (2-18:1, 3-18:1, 4-16:1) [mitochondrial membrane] + phosphatidylcholine (1-18:0, 2-18:1) [mitochondrial membrane] <=> 1-acylglycerophosphocholine (18:0) [mitochondrial membrane] + cardiolipin (1-18:1, 2-18:1, 3-18:1, 4-16:1) [mitochondrial membrane]	YPR140W	-Inf	Inf	0		22345606		YPR140W
r_2699	MLCL (2-18:1, 3-18:1, 4-16:1):PC (1-18:1, 2-18:1) acyltransferase, mitochondrial membrane	monolysocardiolipin (2-18:1, 3-18:1, 4-16:1) [mitochondrial membrane] + phosphatidylcholine (1-18:1, 2-18:1) [mitochondrial membrane] <=> 1-acylglycerophosphocholine (18:1) [mitochondrial membrane] + cardiolipin (1-18:1, 2-18:1, 3-18:1, 4-16:1) [mitochondrial membrane]	YPR140W	-Inf	Inf	0		22345606		YPR140W
r_2700	MLCL (2-18:1, 3-16:0, 4-18:1):PC (1-16:0, 2-16:1) acyltransferase, mitochondrial membrane	monolysocardiolipin (2-18:1, 3-16:0, 4-18:1) [mitochondrial membrane] + phosphatidylcholine (1-16:0, 2-16:1) [mitochondrial membrane] <=> cardiolipin (1-16:1, 2-18:1, 3-16:0, 4-18:1) [mitochondrial membrane] + 1-acylglycerophosphocholine (16:0) [mitochondrial membrane]	YPR140W	-Inf	Inf	0		22345606		YPR140W
r_2701	MLCL (2-18:1, 3-16:0, 4-18:1):PC (1-16:1, 2-16:1) acyltransferase, mitochondrial membrane	monolysocardiolipin (2-18:1, 3-16:0, 4-18:1) [mitochondrial membrane] + phosphatidylcholine (1-16:1, 2-16:1) [mitochondrial membrane] <=> cardiolipin (1-16:1, 2-18:1, 3-16:0, 4-18:1) [mitochondrial membrane] + 1-acylglycerophosphocholine (16:1) [mitochondrial membrane]	YPR140W	-Inf	Inf	0		22345606		YPR140W
r_2702	MLCL (2-18:1, 3-16:0, 4-18:1):PC (1-18:0, 2-16:1) acyltransferase, mitochondrial membrane	monolysocardiolipin (2-18:1, 3-16:0, 4-18:1) [mitochondrial membrane] + phosphatidylcholine (1-18:0, 2-16:1) [mitochondrial membrane] <=> cardiolipin (1-16:1, 2-18:1, 3-16:0, 4-18:1) [mitochondrial membrane] + 1-acylglycerophosphocholine (18:0) [mitochondrial membrane]	YPR140W	-Inf	Inf	0		22345606		YPR140W
r_2703	MLCL (2-18:1, 3-16:0, 4-18:1):PC (1-18:1, 2-16:1) acyltransferase, mitochondrial membrane	monolysocardiolipin (2-18:1, 3-16:0, 4-18:1) [mitochondrial membrane] + phosphatidylcholine (1-18:1, 2-16:1) [mitochondrial membrane] <=> cardiolipin (1-16:1, 2-18:1, 3-16:0, 4-18:1) [mitochondrial membrane] + 1-acylglycerophosphocholine (18:1) [mitochondrial membrane]	YPR140W	-Inf	Inf	0		22345606		YPR140W
r_2704	MLCL (2-18:1, 3-16:0, 4-18:1):PC (1-16:0, 2-18:1) acyltransferase, mitochondrial membrane	monolysocardiolipin (2-18:1, 3-16:0, 4-18:1) [mitochondrial membrane] + phosphatidylcholine (1-16:0, 2-18:1) [mitochondrial membrane] <=> 1-acylglycerophosphocholine (16:0) [mitochondrial membrane] + cardiolipin (1-18:1, 2-18:1, 3-16:0, 4-18:1) [mitochondrial membrane]	YPR140W	-Inf	Inf	0		22345606		YPR140W
r_2705	MLCL (2-18:1, 3-16:0, 4-18:1):PC (1-16:1, 2-18:1) acyltransferase, mitochondrial membrane	monolysocardiolipin (2-18:1, 3-16:0, 4-18:1) [mitochondrial membrane] + phosphatidylcholine (1-16:1, 2-18:1) [mitochondrial membrane] <=> 1-acylglycerophosphocholine (16:1) [mitochondrial membrane] + cardiolipin (1-18:1, 2-18:1, 3-16:0, 4-18:1) [mitochondrial membrane]	YPR140W	-Inf	Inf	0		22345606		YPR140W
r_2706	MLCL (2-18:1, 3-16:0, 4-18:1):PC (1-18:0, 2-18:1) acyltransferase, mitochondrial membrane	monolysocardiolipin (2-18:1, 3-16:0, 4-18:1) [mitochondrial membrane] + phosphatidylcholine (1-18:0, 2-18:1) [mitochondrial membrane] <=> 1-acylglycerophosphocholine (18:0) [mitochondrial membrane] + cardiolipin (1-18:1, 2-18:1, 3-16:0, 4-18:1) [mitochondrial membrane]	YPR140W	-Inf	Inf	0		22345606		YPR140W
r_2707	MLCL (2-18:1, 3-16:0, 4-18:1):PC (1-18:1, 2-18:1) acyltransferase, mitochondrial membrane	monolysocardiolipin (2-18:1, 3-16:0, 4-18:1) [mitochondrial membrane] + phosphatidylcholine (1-18:1, 2-18:1) [mitochondrial membrane] <=> 1-acylglycerophosphocholine (18:1) [mitochondrial membrane] + cardiolipin (1-18:1, 2-18:1, 3-16:0, 4-18:1) [mitochondrial membrane]	YPR140W	-Inf	Inf	0		22345606		YPR140W
r_2708	MLCL (2-18:1, 3-16:1, 4-18:1):PC (1-16:0, 2-16:1) acyltransferase, mitochondrial membrane	monolysocardiolipin (2-18:1, 3-16:1, 4-18:1) [mitochondrial membrane] + phosphatidylcholine (1-16:0, 2-16:1) [mitochondrial membrane] <=> cardiolipin (1-16:1, 2-18:1, 3-16:1, 4-18:1) [mitochondrial membrane] + 1-acylglycerophosphocholine (16:0) [mitochondrial membrane]	YPR140W	-Inf	Inf	0		22345606		YPR140W
r_2709	MLCL (2-18:1, 3-16:1, 4-18:1):PC (1-16:1, 2-16:1) acyltransferase, mitochondrial membrane	monolysocardiolipin (2-18:1, 3-16:1, 4-18:1) [mitochondrial membrane] + phosphatidylcholine (1-16:1, 2-16:1) [mitochondrial membrane] <=> cardiolipin (1-16:1, 2-18:1, 3-16:1, 4-18:1) [mitochondrial membrane] + 1-acylglycerophosphocholine (16:1) [mitochondrial membrane]	YPR140W	-Inf	Inf	0		22345606		YPR140W
r_2710	MLCL (2-18:1, 3-16:1, 4-18:1):PC (1-18:0, 2-16:1) acyltransferase, mitochondrial membrane	monolysocardiolipin (2-18:1, 3-16:1, 4-18:1) [mitochondrial membrane] + phosphatidylcholine (1-18:0, 2-16:1) [mitochondrial membrane] <=> cardiolipin (1-16:1, 2-18:1, 3-16:1, 4-18:1) [mitochondrial membrane] + 1-acylglycerophosphocholine (18:0) [mitochondrial membrane]	YPR140W	-Inf	Inf	0		22345606		YPR140W
r_2711	MLCL (2-18:1, 3-16:1, 4-18:1):PC (1-18:1, 2-16:1) acyltransferase, mitochondrial membrane	monolysocardiolipin (2-18:1, 3-16:1, 4-18:1) [mitochondrial membrane] + phosphatidylcholine (1-18:1, 2-16:1) [mitochondrial membrane] <=> cardiolipin (1-16:1, 2-18:1, 3-16:1, 4-18:1) [mitochondrial membrane] + 1-acylglycerophosphocholine (18:1) [mitochondrial membrane]	YPR140W	-Inf	Inf	0		22345606		YPR140W
r_2712	MLCL (2-18:1, 3-16:1, 4-18:1):PC (1-16:0, 2-18:1) acyltransferase, mitochondrial membrane	monolysocardiolipin (2-18:1, 3-16:1, 4-18:1) [mitochondrial membrane] + phosphatidylcholine (1-16:0, 2-18:1) [mitochondrial membrane] <=> 1-acylglycerophosphocholine (16:0) [mitochondrial membrane] + cardiolipin (1-18:1, 2-18:1, 3-16:1, 4-18:1) [mitochondrial membrane]	YPR140W	-Inf	Inf	0		22345606		YPR140W
r_2713	MLCL (2-18:1, 3-16:1, 4-18:1):PC (1-16:1, 2-18:1) acyltransferase, mitochondrial membrane	monolysocardiolipin (2-18:1, 3-16:1, 4-18:1) [mitochondrial membrane] + phosphatidylcholine (1-16:1, 2-18:1) [mitochondrial membrane] <=> 1-acylglycerophosphocholine (16:1) [mitochondrial membrane] + cardiolipin (1-18:1, 2-18:1, 3-16:1, 4-18:1) [mitochondrial membrane]	YPR140W	-Inf	Inf	0		22345606		YPR140W
r_2714	MLCL (2-18:1, 3-16:1, 4-18:1):PC (1-18:0, 2-18:1) acyltransferase, mitochondrial membrane	monolysocardiolipin (2-18:1, 3-16:1, 4-18:1) [mitochondrial membrane] + phosphatidylcholine (1-18:0, 2-18:1) [mitochondrial membrane] <=> 1-acylglycerophosphocholine (18:0) [mitochondrial membrane] + cardiolipin (1-18:1, 2-18:1, 3-16:1, 4-18:1) [mitochondrial membrane]	YPR140W	-Inf	Inf	0		22345606		YPR140W
r_2715	MLCL (2-18:1, 3-16:1, 4-18:1):PC (1-18:1, 2-18:1) acyltransferase, mitochondrial membrane	monolysocardiolipin (2-18:1, 3-16:1, 4-18:1) [mitochondrial membrane] + phosphatidylcholine (1-18:1, 2-18:1) [mitochondrial membrane] <=> 1-acylglycerophosphocholine (18:1) [mitochondrial membrane] + cardiolipin (1-18:1, 2-18:1, 3-16:1, 4-18:1) [mitochondrial membrane]	YPR140W	-Inf	Inf	0		22345606		YPR140W
r_2716	MLCL (1-16:0, 2-16:1, 4-16:1):PC (1-16:0, 2-16:1) acyltransferase, mitochondrial membrane	monolysocardiolipin (1-16:0, 2-16:1, 4-16:1) [mitochondrial membrane] + phosphatidylcholine (1-16:0, 2-16:1) [mitochondrial membrane] <=> cardiolipin (1-16:0, 2-16:1, 3-16:1, 4-16:1) [mitochondrial membrane] + 1-acylglycerophosphocholine (16:0) [mitochondrial membrane]	YPR140W	-Inf	Inf	0		22345606		YPR140W
r_2717	MLCL (1-16:0, 2-16:1, 4-16:1):PC (1-16:1, 2-16:1) acyltransferase, mitochondrial membrane	monolysocardiolipin (1-16:0, 2-16:1, 4-16:1) [mitochondrial membrane] + phosphatidylcholine (1-16:1, 2-16:1) [mitochondrial membrane] <=> cardiolipin (1-16:0, 2-16:1, 3-16:1, 4-16:1) [mitochondrial membrane] + 1-acylglycerophosphocholine (16:1) [mitochondrial membrane]	YPR140W	-Inf	Inf	0		22345606		YPR140W
r_2718	MLCL (1-16:0, 2-16:1, 4-16:1):PC (1-18:0, 2-16:1) acyltransferase, mitochondrial membrane	monolysocardiolipin (1-16:0, 2-16:1, 4-16:1) [mitochondrial membrane] + phosphatidylcholine (1-18:0, 2-16:1) [mitochondrial membrane] <=> cardiolipin (1-16:0, 2-16:1, 3-16:1, 4-16:1) [mitochondrial membrane] + 1-acylglycerophosphocholine (18:0) [mitochondrial membrane]	YPR140W	-Inf	Inf	0		22345606		YPR140W
r_2719	MLCL (1-16:0, 2-16:1, 4-16:1):PC (1-18:1, 2-16:1) acyltransferase, mitochondrial membrane	monolysocardiolipin (1-16:0, 2-16:1, 4-16:1) [mitochondrial membrane] + phosphatidylcholine (1-18:1, 2-16:1) [mitochondrial membrane] <=> cardiolipin (1-16:0, 2-16:1, 3-16:1, 4-16:1) [mitochondrial membrane] + 1-acylglycerophosphocholine (18:1) [mitochondrial membrane]	YPR140W	-Inf	Inf	0		22345606		YPR140W
r_2720	MLCL (1-16:0, 2-16:1, 4-16:1):PC (1-16:0, 2-18:1) acyltransferase, mitochondrial membrane	monolysocardiolipin (1-16:0, 2-16:1, 4-16:1) [mitochondrial membrane] + phosphatidylcholine (1-16:0, 2-18:1) [mitochondrial membrane] <=> cardiolipin (1-16:0, 2-16:1, 3-18:1, 4-16:1) [mitochondrial membrane] + 1-acylglycerophosphocholine (16:0) [mitochondrial membrane]	YPR140W	-Inf	Inf	0		22345606		YPR140W
r_2721	MLCL (1-16:0, 2-16:1, 4-16:1):PC (1-16:1, 2-18:1) acyltransferase, mitochondrial membrane	monolysocardiolipin (1-16:0, 2-16:1, 4-16:1) [mitochondrial membrane] + phosphatidylcholine (1-16:1, 2-18:1) [mitochondrial membrane] <=> cardiolipin (1-16:0, 2-16:1, 3-18:1, 4-16:1) [mitochondrial membrane] + 1-acylglycerophosphocholine (16:1) [mitochondrial membrane]	YPR140W	-Inf	Inf	0		22345606		YPR140W
r_2722	MLCL (1-16:0, 2-16:1, 4-16:1):PC (1-18:0, 2-18:1) acyltransferase, mitochondrial membrane	monolysocardiolipin (1-16:0, 2-16:1, 4-16:1) [mitochondrial membrane] + phosphatidylcholine (1-18:0, 2-18:1) [mitochondrial membrane] <=> cardiolipin (1-16:0, 2-16:1, 3-18:1, 4-16:1) [mitochondrial membrane] + 1-acylglycerophosphocholine (18:0) [mitochondrial membrane]	YPR140W	-Inf	Inf	0		22345606		YPR140W
r_2723	MLCL (1-16:0, 2-16:1, 4-16:1):PC (1-18:1, 2-18:1) acyltransferase, mitochondrial membrane	monolysocardiolipin (1-16:0, 2-16:1, 4-16:1) [mitochondrial membrane] + phosphatidylcholine (1-18:1, 2-18:1) [mitochondrial membrane] <=> cardiolipin (1-16:0, 2-16:1, 3-18:1, 4-16:1) [mitochondrial membrane] + 1-acylglycerophosphocholine (18:1) [mitochondrial membrane]	YPR140W	-Inf	Inf	0		22345606		YPR140W
r_2724	MLCL (1-16:0, 2-16:1, 4-18:1):PC (1-16:0, 2-16:1) acyltransferase, mitochondrial membrane	monolysocardiolipin (1-16:0, 2-16:1, 4-18:1) [mitochondrial membrane] + phosphatidylcholine (1-16:0, 2-16:1) [mitochondrial membrane] <=> cardiolipin (1-16:0, 2-16:1, 3-16:1, 4-18:1) [mitochondrial membrane] + 1-acylglycerophosphocholine (16:0) [mitochondrial membrane]	YPR140W	-Inf	Inf	0		22345606		YPR140W
r_2725	MLCL (1-16:0, 2-16:1, 4-18:1):PC (1-16:1, 2-16:1) acyltransferase, mitochondrial membrane	monolysocardiolipin (1-16:0, 2-16:1, 4-18:1) [mitochondrial membrane] + phosphatidylcholine (1-16:1, 2-16:1) [mitochondrial membrane] <=> cardiolipin (1-16:0, 2-16:1, 3-16:1, 4-18:1) [mitochondrial membrane] + 1-acylglycerophosphocholine (16:1) [mitochondrial membrane]	YPR140W	-Inf	Inf	0		22345606		YPR140W
r_2726	MLCL (1-16:0, 2-16:1, 4-18:1):PC (1-18:0, 2-16:1) acyltransferase, mitochondrial membrane	monolysocardiolipin (1-16:0, 2-16:1, 4-18:1) [mitochondrial membrane] + phosphatidylcholine (1-18:0, 2-16:1) [mitochondrial membrane] <=> cardiolipin (1-16:0, 2-16:1, 3-16:1, 4-18:1) [mitochondrial membrane] + 1-acylglycerophosphocholine (18:0) [mitochondrial membrane]	YPR140W	-Inf	Inf	0		22345606		YPR140W
r_2727	MLCL (1-16:0, 2-16:1, 4-18:1):PC (1-18:1, 2-16:1) acyltransferase, mitochondrial membrane	monolysocardiolipin (1-16:0, 2-16:1, 4-18:1) [mitochondrial membrane] + phosphatidylcholine (1-18:1, 2-16:1) [mitochondrial membrane] <=> cardiolipin (1-16:0, 2-16:1, 3-16:1, 4-18:1) [mitochondrial membrane] + 1-acylglycerophosphocholine (18:1) [mitochondrial membrane]	YPR140W	-Inf	Inf	0		22345606		YPR140W
r_2728	MLCL (1-16:0, 2-16:1, 4-18:1):PC (1-16:0, 2-18:1) acyltransferase, mitochondrial membrane	monolysocardiolipin (1-16:0, 2-16:1, 4-18:1) [mitochondrial membrane] + phosphatidylcholine (1-16:0, 2-18:1) [mitochondrial membrane] <=> 1-acylglycerophosphocholine (16:0) [mitochondrial membrane] + cardiolipin (1-16:0, 2-16:1, 3-18:1, 4-18:1) [mitochondrial membrane]	YPR140W	-Inf	Inf	0		22345606		YPR140W
r_2729	MLCL (1-16:0, 2-16:1, 4-18:1):PC (1-16:1, 2-18:1) acyltransferase, mitochondrial membrane	monolysocardiolipin (1-16:0, 2-16:1, 4-18:1) [mitochondrial membrane] + phosphatidylcholine (1-16:1, 2-18:1) [mitochondrial membrane] <=> 1-acylglycerophosphocholine (16:1) [mitochondrial membrane] + cardiolipin (1-16:0, 2-16:1, 3-18:1, 4-18:1) [mitochondrial membrane]	YPR140W	-Inf	Inf	0		22345606		YPR140W
r_2730	MLCL (1-16:0, 2-16:1, 4-18:1):PC (1-18:0, 2-18:1) acyltransferase, mitochondrial membrane	monolysocardiolipin (1-16:0, 2-16:1, 4-18:1) [mitochondrial membrane] + phosphatidylcholine (1-18:0, 2-18:1) [mitochondrial membrane] <=> 1-acylglycerophosphocholine (18:0) [mitochondrial membrane] + cardiolipin (1-16:0, 2-16:1, 3-18:1, 4-18:1) [mitochondrial membrane]	YPR140W	-Inf	Inf	0		22345606		YPR140W
r_2731	MLCL (1-16:0, 2-16:1, 4-18:1):PC (1-18:1, 2-18:1) acyltransferase, mitochondrial membrane	monolysocardiolipin (1-16:0, 2-16:1, 4-18:1) [mitochondrial membrane] + phosphatidylcholine (1-18:1, 2-18:1) [mitochondrial membrane] <=> 1-acylglycerophosphocholine (18:1) [mitochondrial membrane] + cardiolipin (1-16:0, 2-16:1, 3-18:1, 4-18:1) [mitochondrial membrane]	YPR140W	-Inf	Inf	0		22345606		YPR140W
r_2732	MLCL (1-16:1, 2-16:1, 4-16:1):PC (1-16:0, 2-16:1) acyltransferase, mitochondrial membrane	monolysocardiolipin (1-16:1, 2-16:1, 4-16:1) [mitochondrial membrane] + phosphatidylcholine (1-16:0, 2-16:1) [mitochondrial membrane] <=> cardiolipin (1-16:1, 2-16:1, 3-16:1, 4-16:1) [mitochondrial membrane] + 1-acylglycerophosphocholine (16:0) [mitochondrial membrane]	YPR140W	-Inf	Inf	0		22345606		YPR140W
r_2733	MLCL (1-16:1, 2-16:1, 4-16:1):PC (1-16:1, 2-16:1) acyltransferase, mitochondrial membrane	monolysocardiolipin (1-16:1, 2-16:1, 4-16:1) [mitochondrial membrane] + phosphatidylcholine (1-16:1, 2-16:1) [mitochondrial membrane] <=> cardiolipin (1-16:1, 2-16:1, 3-16:1, 4-16:1) [mitochondrial membrane] + 1-acylglycerophosphocholine (16:1) [mitochondrial membrane]	YPR140W	-Inf	Inf	0		22345606		YPR140W
r_2734	MLCL (1-16:1, 2-16:1, 4-16:1):PC (1-18:0, 2-16:1) acyltransferase, mitochondrial membrane	monolysocardiolipin (1-16:1, 2-16:1, 4-16:1) [mitochondrial membrane] + phosphatidylcholine (1-18:0, 2-16:1) [mitochondrial membrane] <=> cardiolipin (1-16:1, 2-16:1, 3-16:1, 4-16:1) [mitochondrial membrane] + 1-acylglycerophosphocholine (18:0) [mitochondrial membrane]	YPR140W	-Inf	Inf	0		22345606		YPR140W
r_2735	MLCL (1-16:1, 2-16:1, 4-16:1):PC (1-18:1, 2-16:1) acyltransferase, mitochondrial membrane	monolysocardiolipin (1-16:1, 2-16:1, 4-16:1) [mitochondrial membrane] + phosphatidylcholine (1-18:1, 2-16:1) [mitochondrial membrane] <=> cardiolipin (1-16:1, 2-16:1, 3-16:1, 4-16:1) [mitochondrial membrane] + 1-acylglycerophosphocholine (18:1) [mitochondrial membrane]	YPR140W	-Inf	Inf	0		22345606		YPR140W
r_2736	MLCL (1-16:1, 2-16:1, 4-16:1):PC (1-16:0, 2-18:1) acyltransferase, mitochondrial membrane	monolysocardiolipin (1-16:1, 2-16:1, 4-16:1) [mitochondrial membrane] + phosphatidylcholine (1-16:0, 2-18:1) [mitochondrial membrane] <=> cardiolipin (1-16:1, 2-16:1, 3-18:1, 4-16:1) [mitochondrial membrane] + 1-acylglycerophosphocholine (16:0) [mitochondrial membrane]	YPR140W	-Inf	Inf	0		22345606		YPR140W
r_2737	MLCL (1-16:1, 2-16:1, 4-16:1):PC (1-16:1, 2-18:1) acyltransferase, mitochondrial membrane	monolysocardiolipin (1-16:1, 2-16:1, 4-16:1) [mitochondrial membrane] + phosphatidylcholine (1-16:1, 2-18:1) [mitochondrial membrane] <=> cardiolipin (1-16:1, 2-16:1, 3-18:1, 4-16:1) [mitochondrial membrane] + 1-acylglycerophosphocholine (16:1) [mitochondrial membrane]	YPR140W	-Inf	Inf	0		22345606		YPR140W
r_2738	MLCL (1-16:1, 2-16:1, 4-16:1):PC (1-18:0, 2-18:1) acyltransferase, mitochondrial membrane	monolysocardiolipin (1-16:1, 2-16:1, 4-16:1) [mitochondrial membrane] + phosphatidylcholine (1-18:0, 2-18:1) [mitochondrial membrane] <=> cardiolipin (1-16:1, 2-16:1, 3-18:1, 4-16:1) [mitochondrial membrane] + 1-acylglycerophosphocholine (18:0) [mitochondrial membrane]	YPR140W	-Inf	Inf	0		22345606		YPR140W
r_2739	MLCL (1-16:1, 2-16:1, 4-16:1):PC (1-18:1, 2-18:1) acyltransferase, mitochondrial membrane	monolysocardiolipin (1-16:1, 2-16:1, 4-16:1) [mitochondrial membrane] + phosphatidylcholine (1-18:1, 2-18:1) [mitochondrial membrane] <=> cardiolipin (1-16:1, 2-16:1, 3-18:1, 4-16:1) [mitochondrial membrane] + 1-acylglycerophosphocholine (18:1) [mitochondrial membrane]	YPR140W	-Inf	Inf	0		22345606		YPR140W
r_2740	MLCL (1-16:1, 2-16:1, 4-18:1):PC (1-16:0, 2-16:1) acyltransferase, mitochondrial membrane	monolysocardiolipin (1-16:1, 2-16:1, 4-18:1) [mitochondrial membrane] + phosphatidylcholine (1-16:0, 2-16:1) [mitochondrial membrane] <=> cardiolipin (1-16:1, 2-16:1, 3-16:1, 4-18:1) [mitochondrial membrane] + 1-acylglycerophosphocholine (16:0) [mitochondrial membrane]	YPR140W	-Inf	Inf	0		22345606		YPR140W
r_2741	MLCL (1-16:1, 2-16:1, 4-18:1):PC (1-16:1, 2-16:1) acyltransferase, mitochondrial membrane	monolysocardiolipin (1-16:1, 2-16:1, 4-18:1) [mitochondrial membrane] + phosphatidylcholine (1-16:1, 2-16:1) [mitochondrial membrane] <=> cardiolipin (1-16:1, 2-16:1, 3-16:1, 4-18:1) [mitochondrial membrane] + 1-acylglycerophosphocholine (16:1) [mitochondrial membrane]	YPR140W	-Inf	Inf	0		22345606		YPR140W
r_2742	MLCL (1-16:1, 2-16:1, 4-18:1):PC (1-18:0, 2-16:1) acyltransferase, mitochondrial membrane	monolysocardiolipin (1-16:1, 2-16:1, 4-18:1) [mitochondrial membrane] + phosphatidylcholine (1-18:0, 2-16:1) [mitochondrial membrane] <=> cardiolipin (1-16:1, 2-16:1, 3-16:1, 4-18:1) [mitochondrial membrane] + 1-acylglycerophosphocholine (18:0) [mitochondrial membrane]	YPR140W	-Inf	Inf	0		22345606		YPR140W
r_2743	MLCL (1-16:1, 2-16:1, 4-18:1):PC (1-18:1, 2-16:1) acyltransferase, mitochondrial membrane	monolysocardiolipin (1-16:1, 2-16:1, 4-18:1) [mitochondrial membrane] + phosphatidylcholine (1-18:1, 2-16:1) [mitochondrial membrane] <=> cardiolipin (1-16:1, 2-16:1, 3-16:1, 4-18:1) [mitochondrial membrane] + 1-acylglycerophosphocholine (18:1) [mitochondrial membrane]	YPR140W	-Inf	Inf	0		22345606		YPR140W
r_2744	MLCL (1-16:1, 2-16:1, 4-18:1):PC (1-16:0, 2-18:1) acyltransferase, mitochondrial membrane	monolysocardiolipin (1-16:1, 2-16:1, 4-18:1) [mitochondrial membrane] + phosphatidylcholine (1-16:0, 2-18:1) [mitochondrial membrane] <=> 1-acylglycerophosphocholine (16:0) [mitochondrial membrane] + cardiolipin (1-16:1, 2-16:1, 3-18:1, 4-18:1) [mitochondrial membrane]	YPR140W	-Inf	Inf	0		22345606		YPR140W
r_2745	MLCL (1-16:1, 2-16:1, 4-18:1):PC (1-16:1, 2-18:1) acyltransferase, mitochondrial membrane	monolysocardiolipin (1-16:1, 2-16:1, 4-18:1) [mitochondrial membrane] + phosphatidylcholine (1-16:1, 2-18:1) [mitochondrial membrane] <=> 1-acylglycerophosphocholine (16:1) [mitochondrial membrane] + cardiolipin (1-16:1, 2-16:1, 3-18:1, 4-18:1) [mitochondrial membrane]	YPR140W	-Inf	Inf	0		22345606		YPR140W
r_2746	MLCL (1-16:1, 2-16:1, 4-18:1):PC (1-18:0, 2-18:1) acyltransferase, mitochondrial membrane	monolysocardiolipin (1-16:1, 2-16:1, 4-18:1) [mitochondrial membrane] + phosphatidylcholine (1-18:0, 2-18:1) [mitochondrial membrane] <=> 1-acylglycerophosphocholine (18:0) [mitochondrial membrane] + cardiolipin (1-16:1, 2-16:1, 3-18:1, 4-18:1) [mitochondrial membrane]	YPR140W	-Inf	Inf	0		22345606		YPR140W
r_2747	MLCL (1-16:1, 2-16:1, 4-18:1):PC (1-18:1, 2-18:1) acyltransferase, mitochondrial membrane	monolysocardiolipin (1-16:1, 2-16:1, 4-18:1) [mitochondrial membrane] + phosphatidylcholine (1-18:1, 2-18:1) [mitochondrial membrane] <=> 1-acylglycerophosphocholine (18:1) [mitochondrial membrane] + cardiolipin (1-16:1, 2-16:1, 3-18:1, 4-18:1) [mitochondrial membrane]	YPR140W	-Inf	Inf	0		22345606		YPR140W
r_2748	MLCL (1-18:0, 2-16:1, 4-16:1):PC (1-16:0, 2-16:1) acyltransferase, mitochondrial membrane	monolysocardiolipin (1-18:0, 2-16:1, 4-16:1) [mitochondrial membrane] + phosphatidylcholine (1-16:0, 2-16:1) [mitochondrial membrane] <=> cardiolipin (1-18:0, 2-16:1, 3-16:1, 4-16:1) [mitochondrial membrane] + 1-acylglycerophosphocholine (16:0) [mitochondrial membrane]	YPR140W	-Inf	Inf	0		22345606		YPR140W
r_2749	MLCL (1-18:0, 2-16:1, 4-16:1):PC (1-16:1, 2-16:1) acyltransferase, mitochondrial membrane	monolysocardiolipin (1-18:0, 2-16:1, 4-16:1) [mitochondrial membrane] + phosphatidylcholine (1-16:1, 2-16:1) [mitochondrial membrane] <=> cardiolipin (1-18:0, 2-16:1, 3-16:1, 4-16:1) [mitochondrial membrane] + 1-acylglycerophosphocholine (16:1) [mitochondrial membrane]	YPR140W	-Inf	Inf	0		22345606		YPR140W
r_2750	MLCL (1-18:0, 2-16:1, 4-16:1):PC (1-18:0, 2-16:1) acyltransferase, mitochondrial membrane	monolysocardiolipin (1-18:0, 2-16:1, 4-16:1) [mitochondrial membrane] + phosphatidylcholine (1-18:0, 2-16:1) [mitochondrial membrane] <=> cardiolipin (1-18:0, 2-16:1, 3-16:1, 4-16:1) [mitochondrial membrane] + 1-acylglycerophosphocholine (18:0) [mitochondrial membrane]	YPR140W	-Inf	Inf	0		22345606		YPR140W
r_2751	MLCL (1-18:0, 2-16:1, 4-16:1):PC (1-18:1, 2-16:1) acyltransferase, mitochondrial membrane	monolysocardiolipin (1-18:0, 2-16:1, 4-16:1) [mitochondrial membrane] + phosphatidylcholine (1-18:1, 2-16:1) [mitochondrial membrane] <=> cardiolipin (1-18:0, 2-16:1, 3-16:1, 4-16:1) [mitochondrial membrane] + 1-acylglycerophosphocholine (18:1) [mitochondrial membrane]	YPR140W	-Inf	Inf	0		22345606		YPR140W
r_2752	MLCL (1-18:0, 2-16:1, 4-16:1):PC (1-16:0, 2-18:1) acyltransferase, mitochondrial membrane	monolysocardiolipin (1-18:0, 2-16:1, 4-16:1) [mitochondrial membrane] + phosphatidylcholine (1-16:0, 2-18:1) [mitochondrial membrane] <=> cardiolipin (1-18:0, 2-16:1, 3-18:1, 4-16:1) [mitochondrial membrane] + 1-acylglycerophosphocholine (16:0) [mitochondrial membrane]	YPR140W	-Inf	Inf	0		22345606		YPR140W
r_2753	MLCL (1-18:0, 2-16:1, 4-16:1):PC (1-16:1, 2-18:1) acyltransferase, mitochondrial membrane	monolysocardiolipin (1-18:0, 2-16:1, 4-16:1) [mitochondrial membrane] + phosphatidylcholine (1-16:1, 2-18:1) [mitochondrial membrane] <=> cardiolipin (1-18:0, 2-16:1, 3-18:1, 4-16:1) [mitochondrial membrane] + 1-acylglycerophosphocholine (16:1) [mitochondrial membrane]	YPR140W	-Inf	Inf	0		22345606		YPR140W
r_2754	MLCL (1-18:0, 2-16:1, 4-16:1):PC (1-18:0, 2-18:1) acyltransferase, mitochondrial membrane	monolysocardiolipin (1-18:0, 2-16:1, 4-16:1) [mitochondrial membrane] + phosphatidylcholine (1-18:0, 2-18:1) [mitochondrial membrane] <=> cardiolipin (1-18:0, 2-16:1, 3-18:1, 4-16:1) [mitochondrial membrane] + 1-acylglycerophosphocholine (18:0) [mitochondrial membrane]	YPR140W	-Inf	Inf	0		22345606		YPR140W
r_2755	MLCL (1-18:0, 2-16:1, 4-16:1):PC (1-18:1, 2-18:1) acyltransferase, mitochondrial membrane	monolysocardiolipin (1-18:0, 2-16:1, 4-16:1) [mitochondrial membrane] + phosphatidylcholine (1-18:1, 2-18:1) [mitochondrial membrane] <=> cardiolipin (1-18:0, 2-16:1, 3-18:1, 4-16:1) [mitochondrial membrane] + 1-acylglycerophosphocholine (18:1) [mitochondrial membrane]	YPR140W	-Inf	Inf	0		22345606		YPR140W
r_2756	MLCL (1-18:0, 2-16:1, 4-18:1):PC (1-16:0, 2-16:1) acyltransferase, mitochondrial membrane	monolysocardiolipin (1-18:0, 2-16:1, 4-18:1) [mitochondrial membrane] + phosphatidylcholine (1-16:0, 2-16:1) [mitochondrial membrane] <=> cardiolipin (1-18:0, 2-16:1, 3-16:1, 4-18:1) [mitochondrial membrane] + 1-acylglycerophosphocholine (16:0) [mitochondrial membrane]	YPR140W	-Inf	Inf	0		22345606		YPR140W
[truncated: 2,045 more rows]

## Sheet: EnzymeNameConversion
GeneName	EnzymeOrderId
[truncated: 3,058 more rows]

[truncated: 3 more sheets: Enzyme, mRNA, Fluxes]
